# Supplementary material for: Postdiagnosis body fatness, weight change and breast cancer prognosis: Global Cancer Update Program (CUP global) systematic literature review and meta‐analysis
Source: PubMed Central journal article supplement — Int J Cancer. 2022 Oct 24;152(4):572–99. doi: 10.1002/ijc.34322 (PMC10092239; doi:10.1002/ijc.34322), 2022-10-24
Supplement: IJC-152-572-s001.pdf [file IJC-152-572-s001.pdf]

## **SUPPORTING INFORMATION**

### **Post-diagnosis body fatness, weight change and breast cancer prognosis: Global Cancer Update Programme (CUP Global) systematic literature review and meta-analysis**

Doris S M Chan, Rita Vieira, Leila Abar, Dagfinn Aune, Katia Balducci, Margarita Cariolou, Darren C Greenwood, Georgios Markozannes, Neesha Nanu, Nerea Becerra-Tomás, Edward L Giovannucci, Marc J Gunter, Alan A Jackson, Ellen Kampman, Vivien Lund, Kate Allen, Nigel T Brockton, Helen Croker, Daphne Katsikioti, Deirdre McGinley-Gieser, Panagiota Mitrou, Martin Wiseman, Amanda J Cross, Elio Riboli, Steven K Clinton, Anne McTiernan, Teresa Norat, Konstantinos K Tsilidis

## Contents

|                                                                                                                                                                      |    |
|----------------------------------------------------------------------------------------------------------------------------------------------------------------------|----|
| Supplementary Text 1 Materials and Methods .....                                                                                                                     | 4  |
| Supplementary Figure S1 Linear and non-linear dose-response meta-analyses of post-diagnosis body mass index and breast cancer recurrence .....                       | 13 |
| Supplementary Figure S2 Linear and nonlinear dose-response meta-analyses of post-diagnosis body mass index and second primary breast cancer .....                    | 14 |
| Supplementary Figure S3 Linear dose-response meta-analyses of post-diagnosis body mass index and non-breast cancer related mortality .....                           | 15 |
| Supplementary Figure S4 Linear dose-response meta-analyses of post-diagnosis body mass index and cardiovascular mortality .....                                      | 15 |
| Supplementary Figure S5 Forest plot for the comparison of the highest versus lowest category of post-diagnosis BMI and all-cause mortality .....                     | 16 |
| Supplementary Figure S6 Forest plot for the comparison of the highest versus lowest category of post-diagnosis BMI and breast cancer-specific mortality .....        | 17 |
| Supplementary Figure S7 Forest plot for the comparison of the highest versus lowest category of post-diagnosis BMI and breast cancer recurrence .....                | 18 |
| Supplementary Figure S8 Linear and non-linear dose-response meta-analyses of post-diagnosis waist circumference and all-cause mortality .....                        | 19 |
| Supplementary Figure S9 Linear dose-response meta-analysis of post-diagnosis waist circumference and breast cancer-specific mortality .....                          | 20 |
| Supplementary Figure S10 Linear and non-linear dose-response meta-analyses of post-diagnosis waist-hip-ratio and all-cause mortality .....                           | 21 |
| Supplementary Figure S11 Linear and non-linear dose-response meta-analyses of post-diagnosis waist-hip-ratio and breast cancer-specific mortality .....              | 22 |
| Supplementary Figure S12 Relative risk of all-cause mortality per 10 cm increase of post-diagnosis waist circumference by BMI adjustment .....                       | 23 |
| Supplementary Figure S13 Relative risk of all-cause mortality per 0.1 increase of post-diagnosis waist-hip-ratio by BMI adjustment .....                             | 24 |
| Supplementary Figure S14 Relative risk of breast cancer-specific mortality per 0.1 increase of post-diagnosis waist-hip-ratio by BMI adjustment .....                | 24 |
| Supplementary Figure S15 Forest plot for the comparison of the highest versus lowest category of post-diagnosis waist circumference and breast cancer outcomes ..... | 25 |
| Supplementary Figure S16 Relative risk (95% CI) of all-cause mortality by categorical comparison of pre- to post-diagnosis weight change .....                       | 26 |
| Supplementary Figure S17 Relative risk (95% CI) of breast cancer-specific mortality by categorical comparison of pre- to post-diagnosis weight change .....          | 27 |
| Supplementary Figure S18 Forest plot for post-diagnosis weight change and breast cancer outcomes .....                                                               | 28 |

|                                                                                                                                                                                                                       |     |
|-----------------------------------------------------------------------------------------------------------------------------------------------------------------------------------------------------------------------|-----|
| Supplementary Figure S19 Forest plot for post-diagnosis BMI change and breast cancer outcomes .                                                                                                                       | 29  |
| Supplementary Figure S20 Forest plot for breast cancer recurrence by categorical comparison of pre- to post-diagnosis weight change .....                                                                             | 30  |
| Supplementary Figure S21 Funnel plot of A. all studies B. all but three small studies included in the dose response meta-analysis of post-diagnosis body mass index and risk of breast cancer-specific mortality..... | 31  |
| Supplementary Table S1 PRISMA 2009 Checklist .....                                                                                                                                                                    | 32  |
| Supplementary Table S2 Grading criteria for evidence on diet, nutrition, physical activity and survival in women with breast cancer .....                                                                             | 35  |
| Supplementary Table S3 Publications included in or excluded from the specific systematic reviews and meta-analyses and reasons of exclusion .....                                                                     | 36  |
| Supplementary Table S4 Description of studies included in or excluded from the descriptive review or meta-analysis of body mass index.....                                                                            | 41  |
| Supplementary Table S5 Description of studies included in or excluded from the descriptive review or meta-analysis of waist circumference (WC).....                                                                   | 215 |
| Supplementary Table S6 Description of studies included in or excluded from the descriptive review or meta-analysis of waist-to-hip ratio (WHR) .....                                                                  | 221 |
| Supplementary Table S7 Description of studies included in or excluded from the descriptive review or meta-analysis of weight change .....                                                                             | 228 |
| Supplementary Table S8 Description of studies included in or excluded from the descriptive review of BMI change .....                                                                                                 | 261 |
| REFERENCES .....                                                                                                                                                                                                      | 276 |

## **Supplementary Text 1 Materials and Methods**

This systematic literature review and meta-analysis was conducted as part of the on-going Global Cancer Update Programme (CUP Global), formally known as the WCRF/AICR Continuous Update Project (CUP)<sup>18</sup>, which aims to update the evidence for cancer prevention recommendations<sup>5</sup>. The peer-reviewed protocol is available online<sup>19</sup>. The complete search strategies are shown below\*. The PRISMA checklist is available in Supplementary Table S1.

### **Literature search**

PubMed and Embase databases were searched for relevant peer-reviewed publications of any languages through 31<sup>st</sup> October 2021, using a search strategy that comprises the index terms and text words for the anthropometric factors and breast cancer outcomes. Relevant systematic literature reviews were searched in the Cochrane Database of Systematic Reviews. The reference lists of published meta-analyses, reviews and pooled projects were screened for any additional publications.

### **Study selection**

Inclusion criteria were 1) Randomised controlled trials (RCTs) with at least six months of follow-up and/or intervention duration, longitudinal observational studies, and pooled analyses of individual data of these studies; 2) With at least 100 women diagnosed with first primary breast cancer during adulthood; 3) Reported results on post-diagnosis body mass index (BMI) (measure of general obesity), waist circumference or waist-hip-ratio (measures of abdominal obesity), and changes in weight or BMI in relation to breast cancer outcomes (all-cause mortality, breast cancer-specific mortality; breast cancer recurrence, any second primary cancers, non-breast cancer-related mortality, cardiovascular mortality).

Exclusion criteria were 1) Case report and ecologic, cross-sectional and case-control studies; 2) Articles published as comments, reviews, news or conference abstracts; 3) Articles from non-peer reviewed journals.

In the case of multiple publications from the same study or from studies of overlapping populations, the publication with the largest number of deaths or recurrent events was selected for meta-analysis. Pre-diagnosis or combined pre- and post-diagnosis associations were not meta-analysed in the current review. The studies were not excluded based on study quality.

### **Data extraction**

The following variables were extracted into the CUP Global database: first author and publication year; study name, location, design, size, length of follow-up and those lost to follow-up; age,

menopausal status, year of diagnosis or treatment, disease characteristics, and cancer treatment of the participants; assessment method and definition of post-diagnosis exposure factors and breast cancer outcomes; exposure categories; numbers of outcome events and total participants per exposure category; estimates of relative risk (RR) or hazard ratios (HR) with their 95% confidence intervals (CI) or P-values; and covariate adjustment in the analysis.

Authors of the publications were not contacted for any missing information. Study selection and data extraction was conducted by the CUP Global team and at least 10% of the work was checked by a second reviewer. Any disagreements were resolved by consensus.

The quality of individual studies was not graded using a specific tool. Instead, relevant study characteristics that could be used to explore potential sources of bias were included into the CUP Global database. For all the included studies, information on potential for selection bias, information bias of exposure and outcome assessment, and residual confounding by cancer stage and treatment was retrieved after identifying the most likely influential sources of bias in cancer survival studies<sup>20, 21</sup>. The potential impact of measurement error, length of follow-up and loss to follow-up, and adjustment for confounding factors was tested in subgroup meta-analyses and meta-regression analyses. Details on how the study authors addressed the potential biases were also included. In the Expert Panel meeting, whether the studies had serious quality issues were discussed when judging the evidence for each exposure-outcome association.

### **Evidence synthesis**

When at least three (additional) studies were identified in the updated search, a linear dose-response meta-analysis was conducted (or updated if reviewed previously with evidence up to 30<sup>th</sup> June 2012<sup>5</sup>) if the studies reported sufficient information for analysis, otherwise the studies were descriptively synthesised. Forest plots for the RR estimates comparing the highest with lowest exposure category were presented to aid results interpretation.

The definitions for “recurrence/relapse-free survival”, “breast cancer recurrence”, “disease-free survival”, “event-free survival”, “progression-free survival”, or “additional breast cancer events” varied between the studies, which could include local, regional and/or distant recurrence (metastasis), second primary breast cancer, any primary cancers, breast cancer-related death, and/or any causes of death. All such studies were reviewed under “recurrence”. When more than one “recurrence” outcomes were reported in a study, the outcome with the highest number of events, most often including any death (disease-free survival) was selected. For BMI, the number of studies allowed additional analysis by recurrence type (locoregional or distant recurrence), and whether non breast cancer-related deaths or any causes of death were included in the definition.

### **Statistical methods for meta-analysis**

The summary relative risk (RR) estimates and their 95% confidence intervals (CIs) were calculated using inverse variance DerSimonian-Laird random-effects model that account for both within-study and between-study variation<sup>22</sup>.

The RR estimates per exposure increment unit were pooled in a dose-response meta-analysis either with estimates provided in the original publications or estimated by us from category-specific risk estimates in the study using the generalised weighted least-squares regression model<sup>23, 24</sup>.

Dose-response meta-analysis was conducted as it accounts for the different exposure levels in the included studies, and the presence of a plausible biological gradient in the association provides confidence on a causal relationship.

The required information for the estimation included RR estimates, and the 95% CIs of the estimates, numbers of events and total participants (missing in 0%-57% of the included studies across the present analyses), for at least three exposure categories with known mean or median values (not reported in the majority of the included studies). Standard imputations were conducted to calculate the required information when missing<sup>25, 26</sup>. Mid-point was assigned to each closed-ended exposure range and the width of the adjacent range was used to estimate the mid-point for an open-ended exposure category. The study was excluded from the analysis if imputation could not be done. When only RR estimates by subgroup of participants were reported, these were pooled in a fixed-effect model to calculate an overall study estimate before pooling with other studies. Post-hoc analyses showed that the summary RR estimates did not materially changed after the studies requiring imputations were excluded from the analyses of associations that received a strong-probable grade in the present review.

In the linear dose-response meta-analysis of BMI, underweight breast cancer survivors (BMI <18.5 kg/m<sup>2</sup> or as defined by studies) were excluded to avoid possible impact on the risk estimation. Pre- to post-diagnosis ( $\geq 1$  year) weight change was grouped into moderate (5-10%), or high (>10%) weight loss or gain, following previous analyses<sup>27, 28</sup>. The RR estimates for the weight change groups were pooled in categorical meta-analyses comparing with the stable weight group ( $\pm 5\%$  weight or as defined by studies).

Multivariable adjusted estimates were selected for the meta-analyses. Between-study heterogeneity was assessed by the Cochran's Q test and I<sup>2</sup> statistic<sup>29</sup>, with 30% and 50% as cut-points for low, moderate and high proportion of heterogeneity. In addition, forest plots were visually inspected for consistency of associations, noting the direction and size of the RR estimates, and overlapping of the CIs across included studies, as part of evidence grading. Pre-defined subgroup meta-analyses and random-effects meta-regression analyses were conducted to explore potential heterogeneity sources<sup>30</sup>. The factors investigated were: disease characteristics (menopausal status, hormone

receptor or molecular subtype, invasiveness, nodal status, cancer stage); study type and geographic location; exposure timing respective to cancer treatment; length and loss of follow-up; outcome definition (breast cancer recurrence) and number of events; and aspects of risk of bias (see above). Potential influence from changes of cancer regimens over time on the associations was examined by grouping the studies according to the period when women were diagnosed or treated for breast cancer before 2000 or after 2000 (when doxorubicin or cyclophosphamide use became more common<sup>31</sup>, and before 2005 or after 2005 (when anthracycline use started to decline and taxane<sup>32</sup>, and human epidermal growth factor receptor 2 (HER2) targeted therapy - trastuzumab<sup>33</sup> use concurrently increased).

The Egger's test and visual inspection of the funnel plots were conducted to examine publication bias such as small study bias, when there were more than ten studies<sup>34</sup>. Influence of single studies on the summary RR estimate was examined by leave-one-out analysis, where each study was omitted in turn from the meta-analysis<sup>35</sup>.

Restricted cubic spline regression analysis, with three knots placed at the 10<sup>th</sup>, 50<sup>th</sup>, and 90<sup>th</sup> percentiles of the distribution of the exposure, was conducted and pooled in random-effects meta-analysis to explore the shape of the association when five or more studies with data from at least three exposure categories, including the underweight group if presented, were available<sup>36,37</sup>. The difference between the linear and non-linear models was tested using a likelihood ratio test<sup>38</sup>.

Stata 13.1 (StataCorp, College Station, TX, USA) was used for all statistical analysis.

### **Evidence grading**

An independent Expert Panel (EG, MG, AJ, EK, VL, SC, AMcT) graded the quality of the evidence into strong (subgrades evaluating likelihood of causality: convincing, probable, or substantial effect on risk unlikely) or limited (subgrades evaluating likelihood of causality: limited-suggestive or limited-no conclusion) level, using pre-defined grading criteria to assess the quantity, consistency, magnitude and precision of the summary estimates, existence of a dose-response, study design and risk of bias, generalisability and mechanistic plausibility of the results (Supplementary Table S1).

### **\*Search terms used for PubMed**

#### **a. Searching for mortality, survival, recurrence, second cancer**

1. Recurrence [MeSH Terms] OR "Neoplasm Recurrence, Local" [MeSH Terms] OR "Disease Progression"[MeSH Terms] OR "Disease-Free Survival"[MeSH Terms] OR Mortality[MeSH Terms] OR Mortality [Subheading] OR "Survival Analysis" [MeSH Terms] OR recurrence [tiab] OR recurrences [tiab] OR relapse [tiab] OR relapses [tiab] OR survivor [tiab] OR survivors [tiab] OR progression [tiab] OR survival [tiab] OR mortality [tiab] OR death [tiab] OR second cancer [tiab]

## **b. Searching for studies on breast cancer**

(Search terms are those tested in the SLR for the WCRF/AICR Second Expert Report and the CUP)

2. Breast Neoplasms [MeSH Terms]
3. Breast AND (cancer\* OR neoplasm\* OR tumor\* OR tumor\* OR carcinoma\* OR adenocarcinoma\*)
4. mammary AND (cancer\* OR neoplasm\* OR tumor\* OR tumor\* OR carcinoma\* OR adenocarcinoma\*)
5. #2 OR #3 OR #4

## **c. Search for all studies relating to diet, body fatness and physical activity**

6. diet therapy[MeSH Terms] OR nutrition[MeSH Terms]
7. diet[tiab] OR diets[tiab] OR dietetic[tiab] OR dietary[tiab] OR eating[tiab] OR intake[tiab] OR nutrient\*[tiab] OR nutrition[tiab] OR vegetarian\*[tiab] OR vegan\*[tiab] OR "seventh day adventist"[tiab] OR macrobiotic[tiab]
8. "food and beverages" [MeSH Terms]
9. food\*[tiab] OR cereal\*[tiab] OR grain\*[tiab] OR granary[tiab] OR wholegrain[tiab] OR wholewheat[tiab] OR roots[tiab] OR plantain\*[tiab] OR tuber[tiab] OR tubers[tiab] OR vegetable\*[tiab] OR fruit\*[tiab] OR pulses[tiab] OR beans[tiab] OR lentils[tiab] OR chickpeas[tiab] OR legume\*[tiab] OR soy[tiab] OR soya[tiab] OR nut[tiab] OR nuts[tiab] OR peanut\*[tiab] OR groundnut\*[tiab] OR (seeds[tiab] AND (diet\*[tiab] OR food\*[tiab])) OR meat[tiab] OR beef[tiab] OR pork[tiab] OR lamb[tiab] OR poultry[tiab] OR chicken[tiab] OR turkey[tiab] OR duck[tiab] OR (fish[tiab] AND (diet\*[tiab] OR food\*[tiab])) OR ((fat[tiab] OR fats[tiab] OR fatty[tiab]) AND (diet\*[tiab] OR food\*[tiab] OR adipose[tiab] OR blood[tiab] OR serum[tiab] OR plasma[tiab])) OR egg[tiab] OR eggs[tiab] OR bread[tiab] OR (oils[tiab] AND (diet\*[tiab] OR food\*[tiab] OR adipose[tiab] OR blood[tiab] OR serum[tiab] OR plasma[tiab])) OR shellfish[tiab] OR seafood[tiab] OR sugar[tiab] OR syrup[tiab] OR dairy[tiab] OR milk[tiab] OR herbs[tiab] OR spices[tiab] OR chilli[tiab] OR chillis[tiab] OR pepper\*[tiab] OR condiments[tiab] OR tomato\*[tiab]
10. fluid intake[tiab] OR water[tiab] OR drinks[tiab] OR drinking[tiab] OR tea[tiab] OR coffee[tiab] OR caffeine[tiab] OR juice[tiab] OR beer[tiab] OR spirits[tiab] OR liquor[tiab] OR wine[tiab] OR alcohol[tiab] OR alcoholic[tiab] OR beverage\*[tiab] OR (ethanol[tiab] AND (drink\*[tiab] OR intake[tiab] OR consumption[tiab])) OR yerba mate[tiab] OR ilex paraguariensis[tiab]
11. pesticides[MeSH Terms] OR fertilizers[MeSH Terms] OR "veterinary drugs"[MeSH Terms]
12. pesticide\*[tiab] OR herbicide\*[tiab] OR DDT[tiab] OR fertiliser\*[tiab] OR fertilizer\*[tiab] OR organic[tiab] OR contaminants[tiab] OR contaminate\*[tiab] OR veterinary drug\*[tiab] OR polychlorinated dibenzofuran\*[tiab] OR PCDF\*[tiab] OR polychlorinated dibenzodioxin\*[tiab] OR PCDD\*[tiab] OR polychlorinated biphenyl\*[tiab] OR PCB\*[tiab] OR cadmium[tiab] OR arsenic[tiab] OR chlorinated hydrocarbon\*[tiab] OR microbial contamination\*[tiab]
13. food preservation[MeSH Terms]
14. (mycotoxin\*[tiab] OR aflatoxin\*[tiab] OR pickled[tiab] OR bottled[tiab] OR bottling[tiab] OR canned[tiab] OR canning[tiab] OR vacuum pack\*[tiab] OR refrigerate\*[tiab] OR refrigeration[tiab] OR cured[tiab] OR smoked[tiab] OR preserved[tiab] OR preservatives[tiab] OR nitrosamine[tiab] OR hydrogenation[tiab] OR fortified[tiab] OR additive\*[tiab] OR colouring\*[tiab] OR coloring\*[tiab] OR flavouring\*[tiab] OR flavoring\*[tiab] OR nitrates[tiab] OR nitrites[tiab] OR solvent[tiab] OR solvents[tiab] OR ferment\*[tiab] OR processed[tiab] OR antioxidant\*[tiab] OR genetic modif\*[tiab] OR genetically modif\*[tiab] OR vinyl chloride[tiab] OR packaging[tiab] OR labelling[tiab] OR phthalates[tiab]) AND (diet\*[tiab] OR food\*[tiab] OR adipose[tiab] OR blood[tiab] OR serum[tiab] OR plasma[tiab])



15. cookery[MeSH Terms]

16. cooking[tiab] OR cooked[tiab] OR grill[tiab] OR grilled[tiab] OR fried[tiab] OR fry[tiab] OR roast[tiab] OR bake[tiab] OR baked[tiab] OR stewing[tiab] OR stewed[tiab] OR casserol\*[tiab] OR broil[tiab] OR broiled[tiab] OR boiled[tiab] OR ((microwave[tiab] OR microwaved[tiab] OR re-heating[tiab] OR reheating[tiab] OR heating[tiab] OR re-heated[tiab] OR heated[tiab]) AND (diet\*[tiab] OR food\*[tiab])) OR poach[tiab] OR poached[tiab] OR steamed[tiab] OR barbecue\*[tiab] OR chargrill\*[tiab] OR heterocyclic amines[tiab] OR polycyclic aromatic hydrocarbons[tiab]

17. ((carbohydrates[MeSH Terms] OR proteins[MeSH Terms]) AND (diet\*[tiab] OR food\*[tiab])) OR sweetening agents[MeSH Terms]

18. (salt[tiab] OR salting[tiab] OR salted[tiab] OR fiber[tiab] OR fibre[tiab] OR polysaccharide\*[tiab] OR starch[tiab] OR starchy[tiab] OR carbohydrate\*[tiab] OR lipid\*[tiab] OR linoleic acid\*[tiab] OR sterols[tiab] OR stanols[tiab] OR sugar\*[tiab] OR sweetener\*[tiab] OR saccharin\*[tiab] OR aspartame[tiab] OR acesulfame[tiab] OR cyclamates[tiab] OR maltose[tiab] OR mannitol[tiab] OR sorbitol[tiab] OR sucrose[tiab] OR xylitol[tiab] OR cholesterol[tiab] OR protein[tiab] OR proteins[tiab] OR hydrogenated dietary oils[tiab] OR hydrogenated lard[tiab] OR hydrogenated oils[tiab]) AND (diet\*[tiab] OR food\*[tiab] OR adipose[tiab] OR blood[tiab] OR serum[tiab] OR plasma[tiab])

19. vitamins[MeSH Terms]

20. supplements[tiab] OR supplement[tiab] OR vitamin\*[tiab] OR retinol[tiab] OR carotenoid\*[tiab] OR tocopherol[tiab] OR folate\*[tiab] OR folic acid[tiab] OR methionine[tiab] OR riboflavin[tiab] OR thiamine[tiab] OR niacin[tiab] OR pyridoxine[tiab] OR cobalamin[tiab] OR mineral\*[tiab] OR (sodium[tiab] AND (diet\*[tiab] OR food\*[tiab])) OR iron[tiab] OR ((calcium[tiab] AND (diet\*[tiab] OR food\*[tiab] OR supplement\*[tiab])) OR selenium[tiab] OR (iodine[tiab] AND (diet\*[tiab] OR food\*[tiab] OR supplement\*[tiab] OR deficiency)) OR magnesium[tiab] OR potassium[tiab] OR zinc[tiab] OR copper[tiab] OR phosphorus[tiab] OR manganese[tiab] OR chromium[tiab] OR phytochemical[tiab] OR allium[tiab] OR isothiocyanate\*[tiab] OR glucosinolate\*[tiab] OR indoles[tiab] OR polyphenol\*[tiab] OR phytestrogen\*[tiab] OR genistein[tiab] OR saponin\*[tiab] OR coumarin\*[tiab] OR lycopene[tiab]

21. physical fitness[MeSH Terms] OR physical exertion[MeSH Terms] OR physical endurance[MeSH Terms] OR walking[MeSH Terms] OR exercise[MeSH Terms] OR muscle stretching exercises[MeSH Terms] OR tai ji[MeSH Terms] OR yoga[MeSH Terms] OR sedentary lifestyle[MeSH Terms]

22. recreational activit\*[tiab] OR household activit\*[tiab] OR occupational activit\*[tiab] OR physical activit\*[tiab] OR physical inactivit\*[tiab] OR exercise[tiab] OR exercising[tiab] OR energy intake[tiab] OR energy expenditure[tiab] OR energy

balance[tiab] OR energy density[tiab] OR sedentar\*[tiab] OR standing[tiab] OR sitting[tiab] OR television[tiab] OR aerobic activities[tiab] OR aerobic activity[tiab] OR cardiovascular activities[tiab] OR cardiovascular activity[tiab] OR endurance activities[tiab] OR endurance activity[tiab] OR resistance training[tiab] OR strength training[tiab] OR physical conditioning[tiab] OR functional training[tiab] OR leisure-time physical activity[tiab] OR lifestyle activities[tiab] OR lifestyle activity[tiab] OR qi gong[tiab] OR tai chi[tiab] OR tai ji[tiab] OR yoga[tiab] OR free living activities[tiab] OR free living activity[tiab] OR walk[tiab] OR walking[tiab]

23. body weight[MeSH Terms] OR anthropometry[MeSH Terms] OR body composition[MeSH Terms] OR body constitution[MeSH Terms] OR body size[MeSH Terms] OR body size[tiab]

24. weight loss[tiab] OR weight gain[tiab] OR anthropometry[tiab] OR birth weight[tiab] OR birthweight[tiab] OR birth-weight[tiab] OR child development[tiab] OR height[tiab] OR body composition[tiab] OR body mass index[tiab] OR BMI[tiab] OR obesity[tiab] OR obese[tiab] OR overweight[tiab] OR over-weight[tiab] OR over weight[tiab] OR skinfold measurement\*[tiab] OR skinfold thickness[tiab] OR DEXA[tiab] OR bio-impedence[tiab] OR waist circumference[tiab] OR hip circumference[tiab] OR waist hip ratio\*[tiab]

25. #6 OR #7 OR #8 OR #9 OR #10 OR #11 OR #12 OR #13 OR #14 OR #15 OR #16 OR #17 OR #18 OR #19 OR #20 OR #21 OR #22 OR #23 OR #24

**d. Limiting to human studies:**

26. animal [MeSH Terms] NOT human [MeSH Terms]

27. #25 NOT #26

**e. Combining the searches for each cancer**

(a) AND (b) AND (c) AND (d)

i.e. #1 AND #5 AND #27

**\*Search terms used for OVID Embase**

**a. Searching for mortality, survival, recurrence, second cancer**

- 1 \*Recurrent disease/
- 2 \*Disease exacerbation/
- 3 Disease free survival/
- 4 mortality/ or all-cause mortality/ or cancer mortality/ or cardiovascular mortality/ or mortality rate/ or premature mortality/
- 5 Survival analysis/
- 6 Relapse/
- 7 Survivor/
- 8 Second cancer/
- 9 (recur\$ or local recurrence or progression or relap\$ or prognos\$ or surviv\$ or mortality or death or (second\$ adj5 primar\$)).ab,ti.
- 10 1 or 2 or 3 or 4 or 5 or 6 or 7 or 8 or 9

**b. Searching for studies on breast cancer**

- 11 breast tumor/
- 12 (breast and (cancer\$ or neoplasm\$ or tumour\$ or tumor\$ or carcinoma\$ or adenocarcinoma\$)).tw,kw.
- 13 (mammary and (cancer\$ or neoplasm\$ or tumour\$ or tumor\$ or carcinoma\$ or adenocarcinoma\$)).tw,kw.
- 14 11 or 12 or 13

**c. Search for all studies relating to diet, body fatness and physical activity**

- 15 Diet therapy/
- 16 Nutrition/
- 17 (diet or diets or dietetic\$ or dietary or eating or intake or nutrient\$ or nutrition or vegetarian\$ or vegan\$ or (seventh adj1 day adj1 adventist) or macrobiotic).ab,ti.
- 18 15 or 16 or 17
- 19 Food/
- 20 (food\$ or cereal\$ or grain\$ or granary or wholegrain or wholewheat or roots or plantain\$ or tuber or tubers or vegetable\$ or fruit\$ or pulses or beans or lentils or chickpeas or legume\$ or soy or soya or nut or nuts or peanut\$ or groundnut\$ or (seeds and (diet\$ or food\$))).ab,ti.
- 21 (meat or beef or pork or lamb or poultry or chicken or turkey or duck or (fish and (diet\$ or food\$)) or ((fat or fats or fatty) and (diet\$ or food\$ or adipose or blood or serum or plasma)) or egg or eggs or bread or (oils and (diet\$ or food\$ or adipose or blood or serum or plasma)) or shellfish or seafood or sugar or syrup or dairy or milk or herbs or spices or chilli or chillis or pepper\$ or condiments or tomato\$).ab,ti.
- 22 19 or 20 or 21

- 23 Beverage/  
 24 (fluid intake or water or drinks or drinking or tea or coffee or caffeine or juice or beer or spirits or liquor or wine or alcohol or alcoholic or beverage\$ or (ethanol and (drink\$ or intake or consumption)) or yerba mate or ilex or paraguariensis).ab,ti.  
 25 23 or 24  
 26 \*Pesticide/  
 27 \*Fertilizer/  
 28 \*Veterinary drug/  
 29 (pesticide\$ or herbicide\$ or DDT or fertiliser\$ or fertilizer\$ or organic or contaminants or contaminate\$ or veterinary drug\$ or polychlorinated dibenzofuran\$ or PCDF\$ or polychlorinated dibenzodioxin\$ or PCDD\$ or polychlorinated biphenyl\$ or PCB\$ or cadmium or arsenic or chlorinated hydrocarbon\$ or microbial contamination\$).ab,ti.  
 30 26 or 27 or 28 or 29  
 31 Food Preservation/  
 32 ((mycotoxin\$ or aflatoxin\$ or pickled or bottled or bottling or canned or canning or vacuum pack\$ or refrigerate\$ or refrigeration or cured or smoked or preserved or preservatives or nitrosamine or hydrogenation or fortified or additive\$ or colouring\$ or coloring\$ or flavouring\$ or flavoring\$ or nitrates or nitrites or solvent or solvents or ferment\$ or processed or antioxidant\$ or genetic modif\$ or genetically modif\$ or vinyl chloride or packaging or labelling or phthalates) and (diet\$ or food\$ or adipose or blood or serum or plasma)).ab,ti.  
 33 31 or 32  
 34 Cooking/  
 35 (cooking or cooked or grill or grilled or fried or fry or roast or bake or baked or stewing or stewed or casserol\$ or broil or broiled or boiled or (microwave or microwaved or re-heating or reheating or heating or re-heated or heated and (diet\$ or food\$)) or poach or poached or steamed or barbecue\$ or chargrill\$ or heterocyclic amines or polycyclic aromatic hydrocarbons).ab,ti.  
 36 34 or 35  
 37 Carbohydrate/ and ((diet\$ or food\$).ab,ti.)  
 38 Protein/ and ((diet\$ or food\$).ab,ti.)  
 39 Sweetening agent/  
 40 ((salt or salting or salted or fiber or fibre or polysaccharide\$ or starch or starchy or carbohydrate\$ or lipid\$ or linoleic acid\$ or sterols or stanols or sugar\$ or sweetener\$ or saccharin\$ or aspartame or acesulfame or cyclamates or maltose or mannitol or sorbitol or sucrose or xylitol or cholesterol or hydrogenated dietary oils or hydrogenated lard or hydrogenated oils or protein\$) and (diet\$ or food\$ or adipose or blood or serum or plasma)).ab,ti.  
 41 37 or 38 or 39 or 40  
 42 Vitamins/  
 43 Vitamin D/ or (supplements or supplement or vitamin\$ or retinol or carotenoid\$ or tocopherol or folate\$ or folic acid or methionine or riboflavin or thiamine or niacin or pyridoxine or cobalamin or mineral\$ or (sodium and (diet\$ or food\$)) or iron or (calcium and (diet\$ or food\$ or supplement\$)) or selenium or (iodine and (diet\$ or food\$ or supplement\$ or deficiency)) or magnesium or potassium or zinc or copper or phosphorus or manganese or chromium or phytochemical or allium or isothiocyanate\$ or glucosinolate\$ or indoles or polyphenol\$ or phytoestrogen\$ or genistein or saponin\$ or coumarin\$ or lycopene).ab,ti.  
 44 42 or 43  
 45 \*Fitness/  
 46 Exercise/  
 47 \*Endurance/  
 48 Walking/  
 49 Stretching exercise/  
 50 Tai Chi/  
 51 Qigong/  
 52 Yoga/  
 53 Sedentary lifestyle/  
 54 (physical fitness or physical exertion or physical endurance or muscle stretching exercise\$ or recreational activit\$ or household activit\$ or occupational activit\$ or physical activit\$ or physical inactivit\$ or exercise\$ or exercising or energy intake or energy expenditure or energy balance or energy density or sedentar\$ or standing or sitting or television viewing or aerobic activit\$ or cardiovascular activit\$ or endurance activit\$ or resistance training or strength training or physical conditioning or functional training or leisure time physical activit\$ or lifestyle activit\$ or qigong or tai chi or tai ji or yoga or free living activit\$ or walk or walking).ab,ti.

- 55 45 or 46 or 47 or 48 or 49 or 50 or 51 or 52 or 53 or 54
- 56 Body weight/
- 57 Anthropometry/
- 58 Body Composition/
- 59 Body Constitution/
- 60 Body size/
- 61 (weight or weight loss or weight gain or anthropometry or birth weight or birthweight or birth weight or child development or height or body composition or fat distribution or body mass or BMI or obesity or obese or overweight or over weight or skinfold measurement\$ or skinfold thickness or DEXA or bio-impedence or waist circumference or hip circumference or waist hip ratio\$ or body size).ab,ti.
- 62 56 or 57 or 58 or 59 or 60 or 61
- 63 18 or 22 or 25 or 30 or 33 or 36 or 41 or 44 or 55 or 62
- 64 exp animal/
- 65 exp human/
- 66 64 not 65
- 67 63 not 66

**d. Combined**

- 68 10 and 14 and 67

## Supplementary Figure S1 Linear and non-linear dose-response meta-analyses of post-diagnosis body mass index and breast cancer recurrence

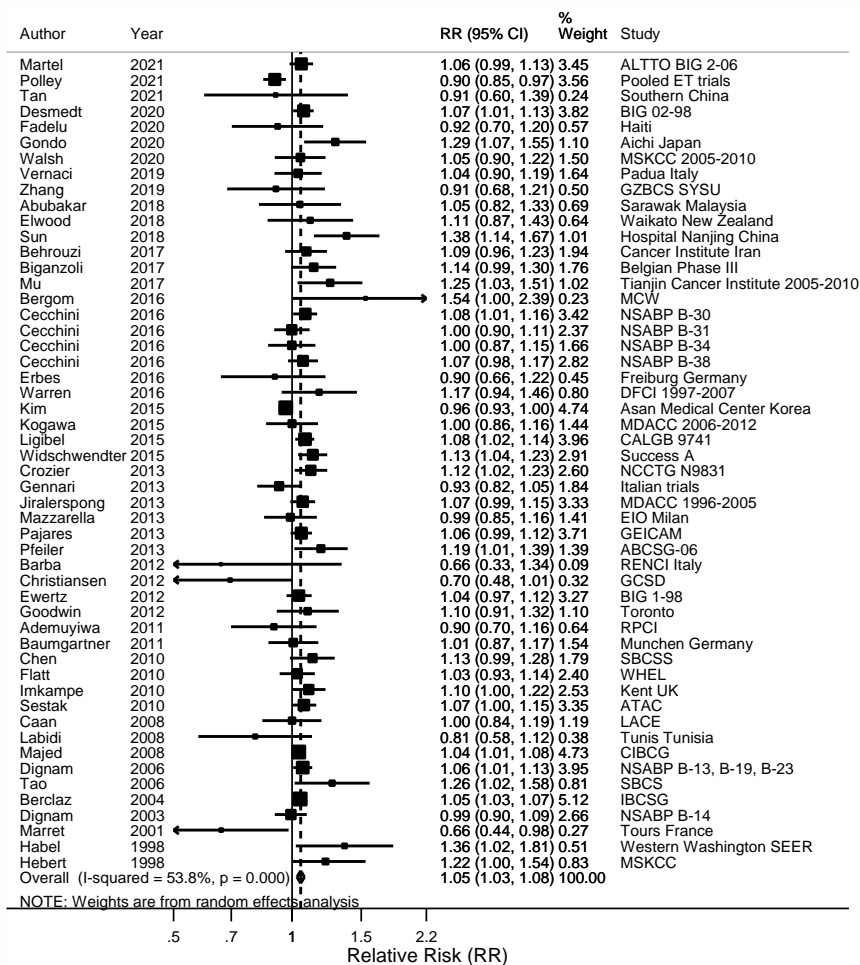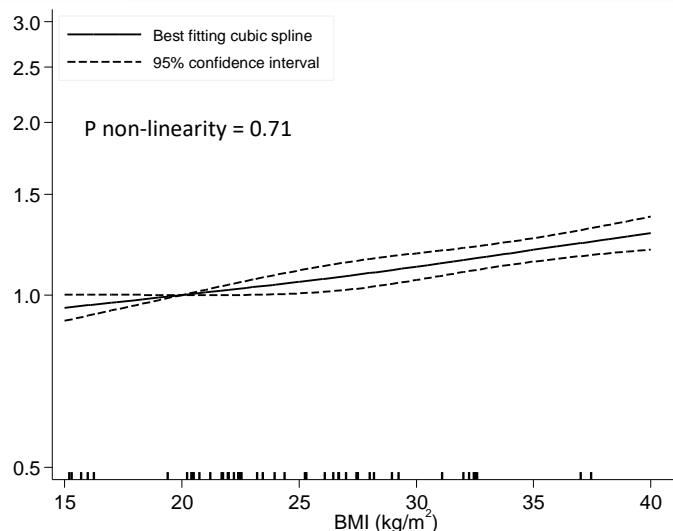

| BMI (kg/m <sup>2</sup> ) | RR estimates (95% CI) |
|--------------------------|-----------------------|
| 16                       | 0.96 (0.92-1.00)      |
| 18                       | 0.98 (0.96-1.00)      |
| 20                       | 1.00                  |
| 22                       | 1.02 (1.00-1.04)      |
| 25                       | 1.05 (1.01-1.10)      |
| 27                       | 1.08 (1.02-1.14)      |
| 30                       | 1.12 (1.06-1.18)      |
| 32                       | 1.15 (1.10-1.21)      |
| 35                       | 1.20 (1.14-1.26)      |
| 37                       | 1.23 (1.17-1.30)      |

Figure legend: Forest plot shows the linear dose-response results (per 5 kg/m<sup>2</sup>) from the inverse variance DerSimonian-Laird random-effects model. Diamond represents the summary relative risk (RR) estimate and its width as the 95% confidence interval (CI). Each square and the horizontal line across the square represents the RR estimate and its 95% CI of the individual study. Non-linear curve was estimated using restricted cubic spline regression with three knots at 10th, 50th and 90<sup>th</sup> percentiles of distribution of the exposure and pooled in random-effects meta-analysis. The table shows the estimated RRs and 95% CIs for selected BMI values comparing to BMI at 20 kg/m<sup>2</sup> as reference.

## Supplementary Figure S2 Linear and nonlinear dose-response meta-analyses of post-diagnosis body mass index and second primary breast cancer

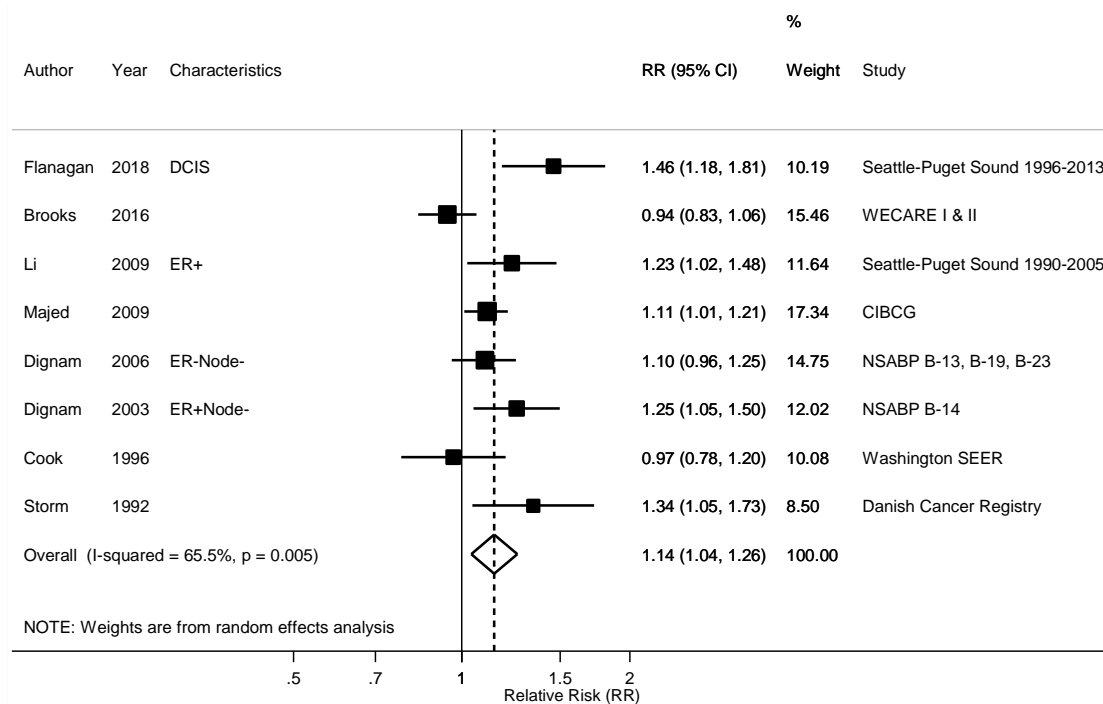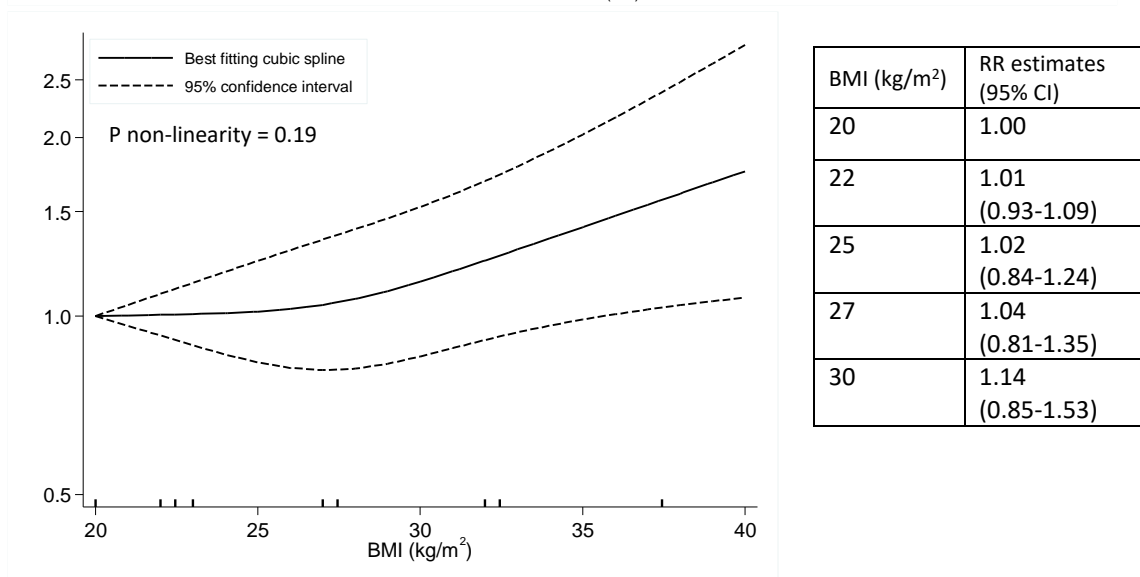

Figure legend: Forest plot shows the linear dose-response results (per 5 kg/m<sup>2</sup>) from the inverse variance DerSimonian-Laird random-effects model. Diamond represents the summary relative risk (RR) estimate and its width as the 95% confidence interval (CI). Each square and the horizontal line across the square represents the RR estimate and its 95% CI of the individual study. Non-linear curve was estimated using restricted cubic spline regression with three knots at 10<sup>th</sup>, 50<sup>th</sup> and 90<sup>th</sup> percentiles of distribution of the exposure and pooled in random-effects meta-analysis. The table shows the estimated RRs and 95% CIs for selected BMI values comparing to BMI at 20 kg/m<sup>2</sup> as reference. DCIS, ductal carcinoma in situ; ER, oestrogen receptor.

**Supplementary Figure S3 Linear dose-response meta-analyses of post-diagnosis body mass index and non-breast cancer related mortality**

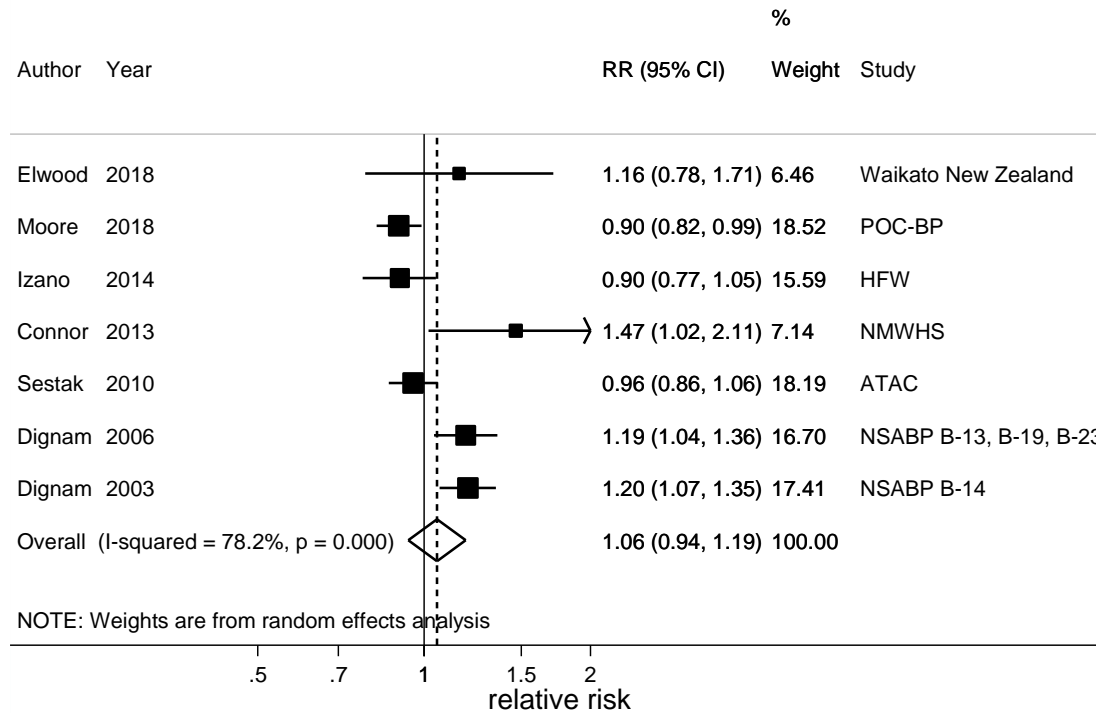

**Supplementary Figure S4 Linear dose-response meta-analyses of post-diagnosis body mass index and cardiovascular mortality**

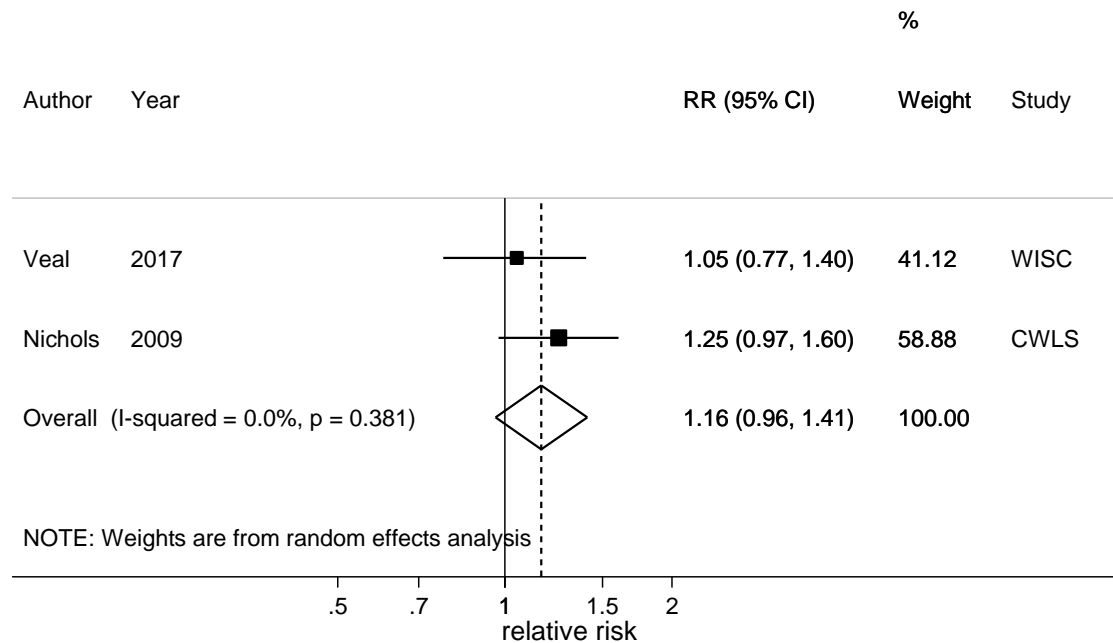

Figure legend: Forest plot shows the linear dose-response results (per 5 kg/m<sup>2</sup>) from the inverse variance DerSimonian-Laird random-effects model. Diamond represents the summary relative risk (RR) estimate and its width as the 95% confidence interval (CI). Each square and the horizontal line across the square represents the RR estimate and its 95% CI of the individual study.





## Supplementary Figure S6 Forest plot for the comparison of the highest versus lowest category of post-diagnosis BMI and breast cancer-specific mortality

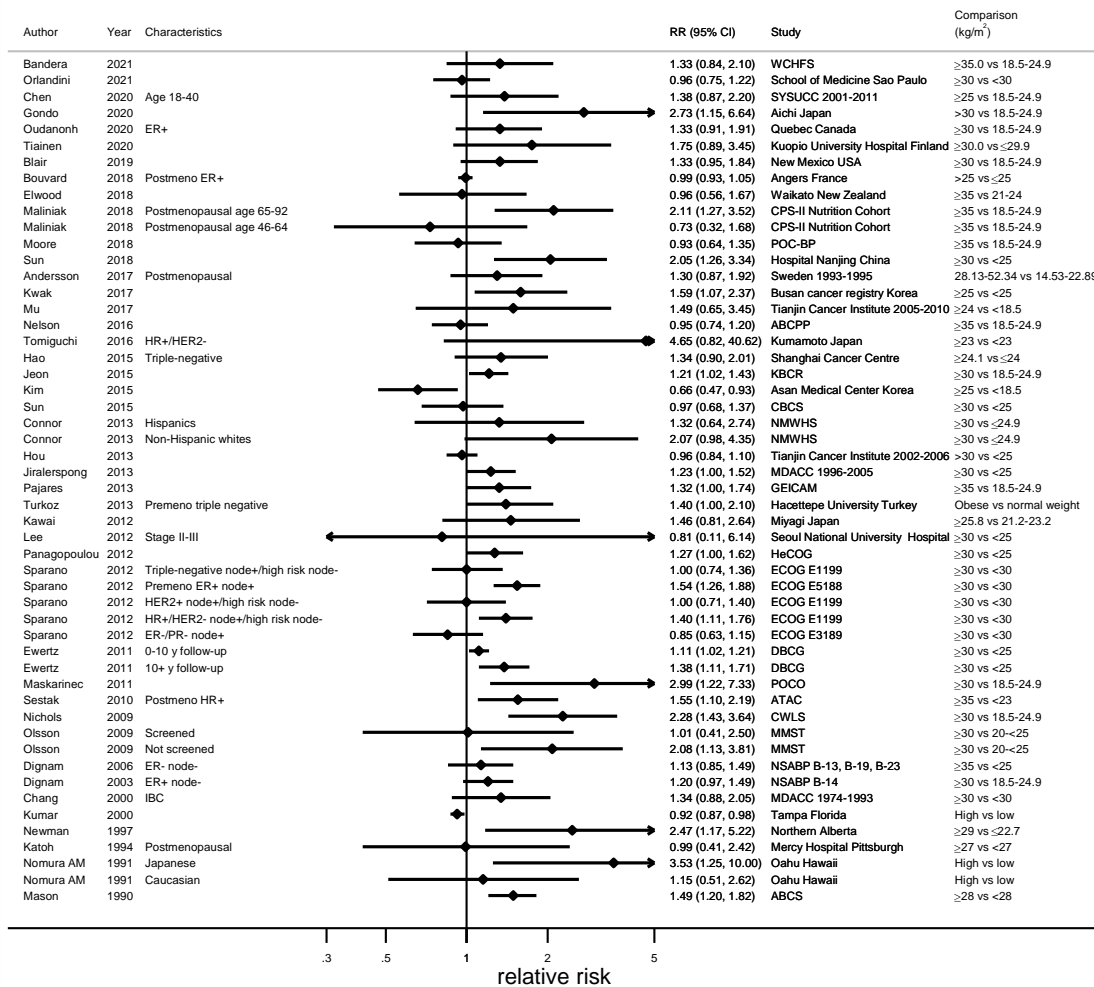

Figure legend: Forest plot shows the results for the highest versus lowest BMI categories. Each diamond and the horizontal line across the diamond represents the relative risk (RR) estimate and its 95% confidence interval (CI) of the individual study. A total of 43 publications were included. 16 publications (34% of the reviewed publications) were not available in the dose-response meta-analysis<sup>83, 150, 159, 167, 174, 179, 180, 188, 192, 203, 205, 206, 223, 227, 232, 243</sup>. ER, oestrogen receptor; HER2, human epidermal growth factor receptor 2; HR, hormone receptor; IBC, inflammatory breast cancer; Premeno, premenopausal women; Postmeno, postmenopausal women.



**Supplementary Figure S8 Linear and non-linear dose-response meta-analyses of post-diagnosis waist circumference and all-cause mortality**

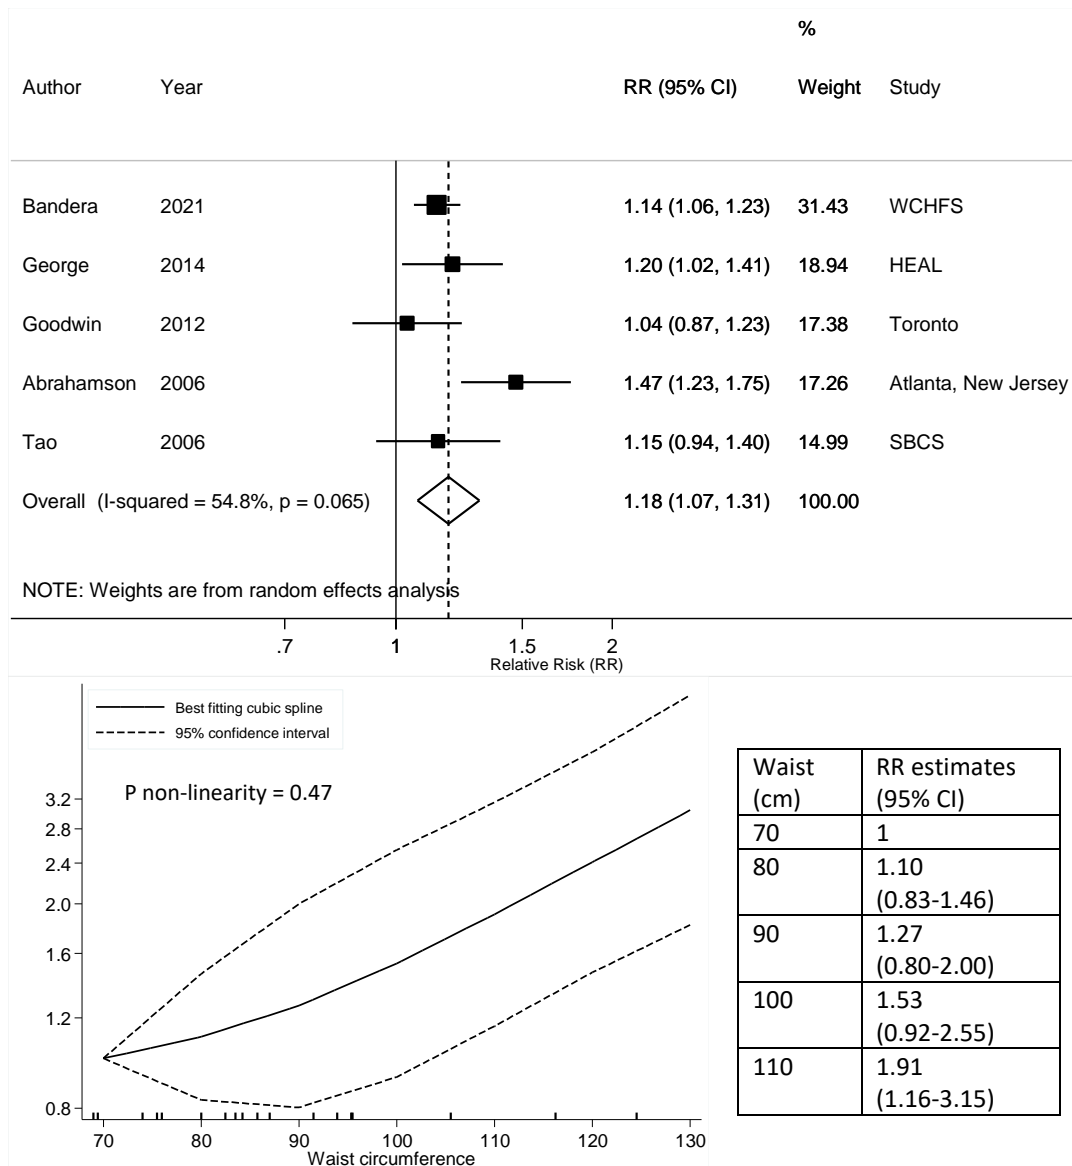

Figure legend: Forest plot shows the linear dose-response results (per 10 cm) from the inverse variance DerSimonian-Laird random-effects model. Diamond represents the summary relative risk (RR) estimate and its width as the 95% confidence interval (CI). Each square and the horizontal line across the square represents the RR estimate and its 95% CI of the individual study. Non-linear curve was estimated using restricted cubic spline regression with three knots at 10th, 50th and 90th percentiles of distribution of the exposure and pooled in random-effects meta-analysis. The estimated RRs and 95% CIs for selected waist circumference values comparing to 70 cm as reference are presented in the table.

**Supplementary Figure S9 Linear dose-response meta-analysis of post-diagnosis waist circumference and breast cancer-specific mortality**

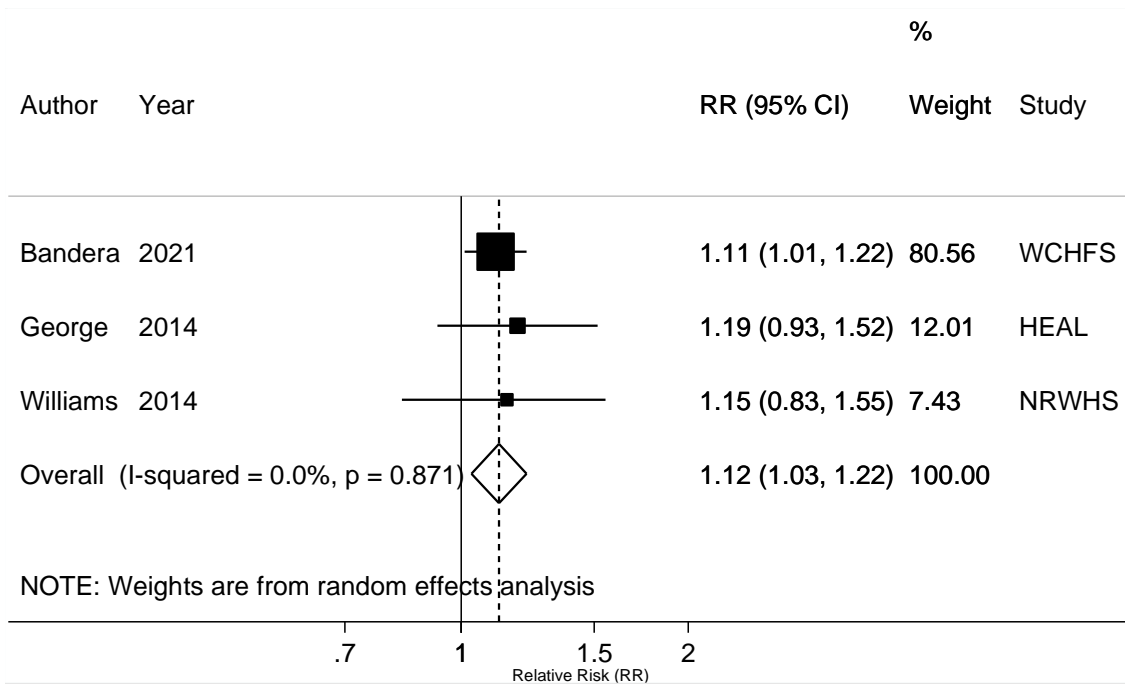

Figure legend: Forest plot shows the linear dose-response results (per 10 cm) from the inverse variance DerSimonian-Laird random-effects model. Diamond represents the summary relative risk (RR) estimate and its width as the 95% confidence interval (CI). Each square and the horizontal line across the square represents the RR estimate and its 95% CI of the individual study. Bandera, 2021<sup>118</sup> and Williams, 2014<sup>117</sup> did not adjust for BMI. George, 2014<sup>71</sup> was adjusted for BMI.

**Supplementary Figure S10 Linear and non-linear dose-response meta-analyses of post-diagnosis waist-hip-ratio and all-cause mortality**

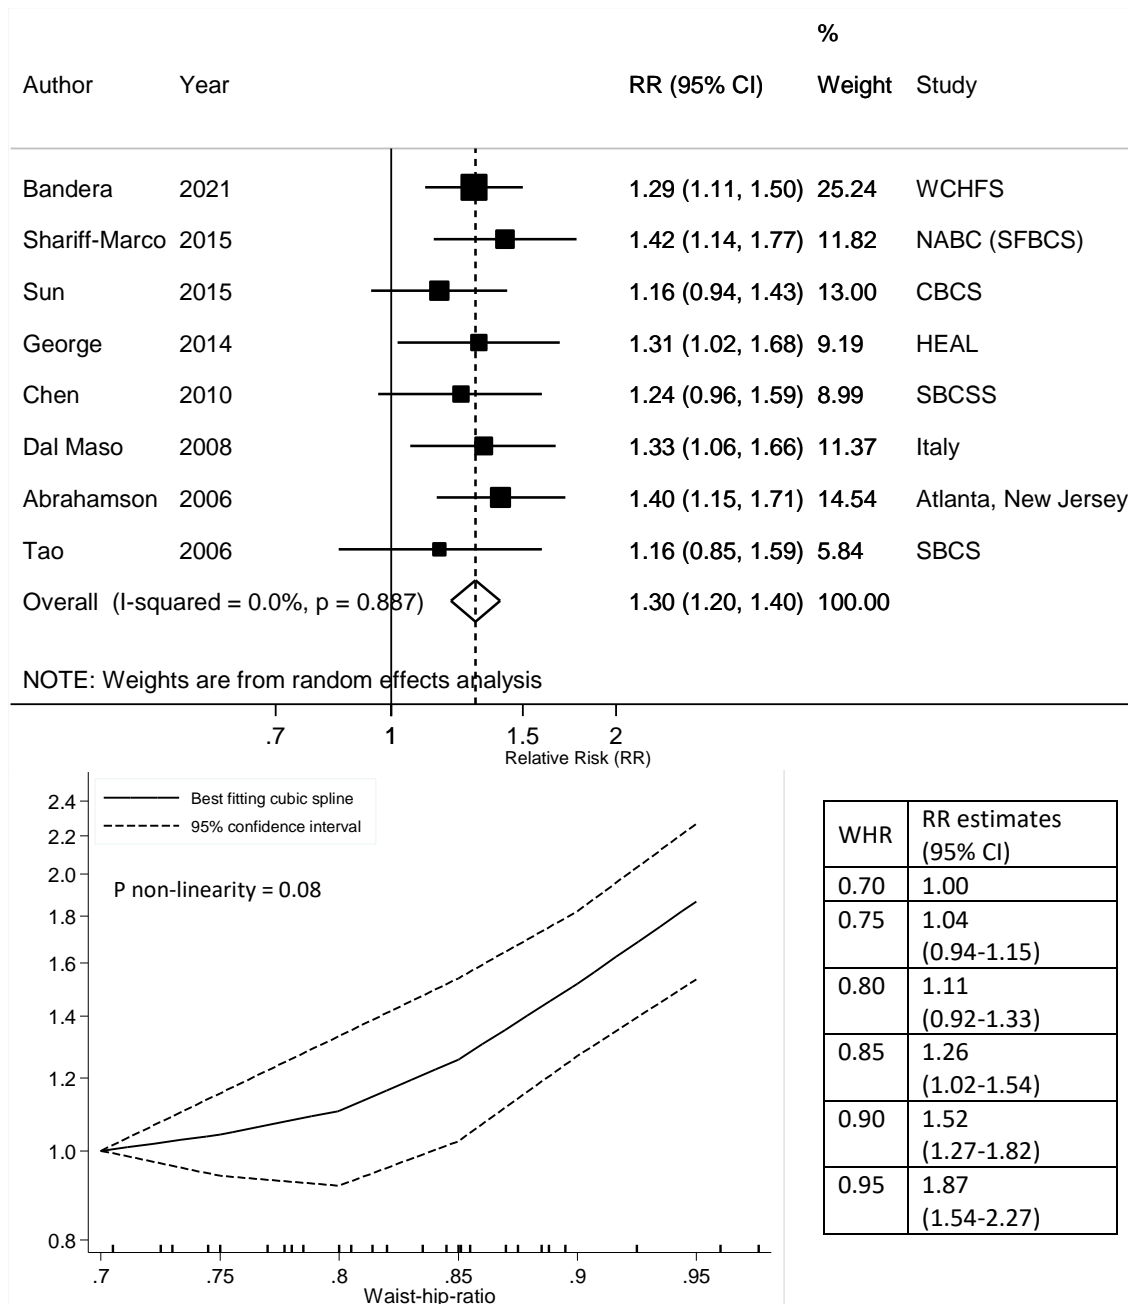

Figure legend: Forest plot shows the linear dose-response results (per 0.1 unit) from the inverse variance DerSimonian-Laird random-effects model. Diamond represents the summary relative risk (RR) estimate and its width as the 95% confidence interval (CI). Each square and the horizontal line across the square represents the RR estimate and its 95% CI of the individual study. Non-linear curve was estimated using restricted cubic spline regression with three knots at 10th, 50th and 90th percentiles of distribution of the exposure and pooled in random-effects meta-analysis. The table shows the estimated RRs and 95% CIs for selected waist-to-hip ratio values comparing to 0.7 unit as reference.

**Supplementary Figure S11 Linear and non-linear dose-response meta-analyses of post-diagnosis waist-hip-ratio and breast cancer-specific mortality**

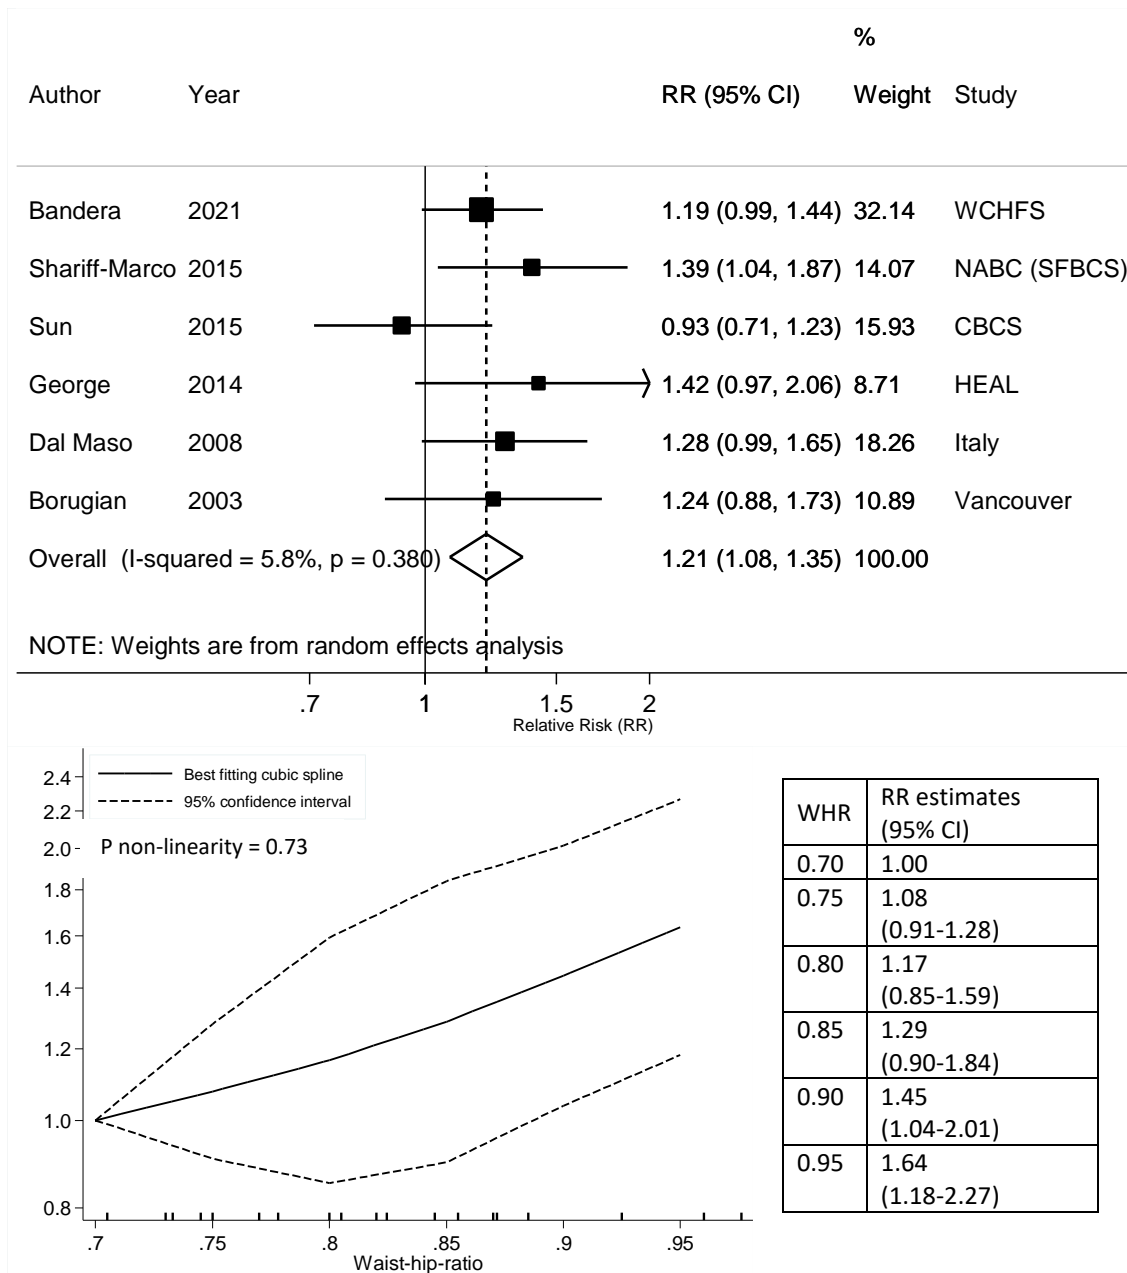

Figure legend: Forest plot shows the linear dose-response results (per 0.1 unit) from the inverse variance DerSimonian-Laird random-effects model. Diamond represents the summary relative risk (RR) estimate and its width as the 95% confidence interval (CI). Each square and the horizontal line across the square represents the RR estimate and its 95% CI of the individual study. Non-linear curve was estimated using restricted cubic spline regression with three knots at 10th, 50th and 90th percentiles of distribution of the exposure and pooled in random-effects meta-analysis. The table shows the estimated RRs and 95% CIs for selected waist-to-hip ratio values comparing to 0.7 unit as reference.

**Supplementary Figure S12 Relative risk of all-cause mortality per 10 cm increase of post-diagnosis waist circumference by BMI adjustment**

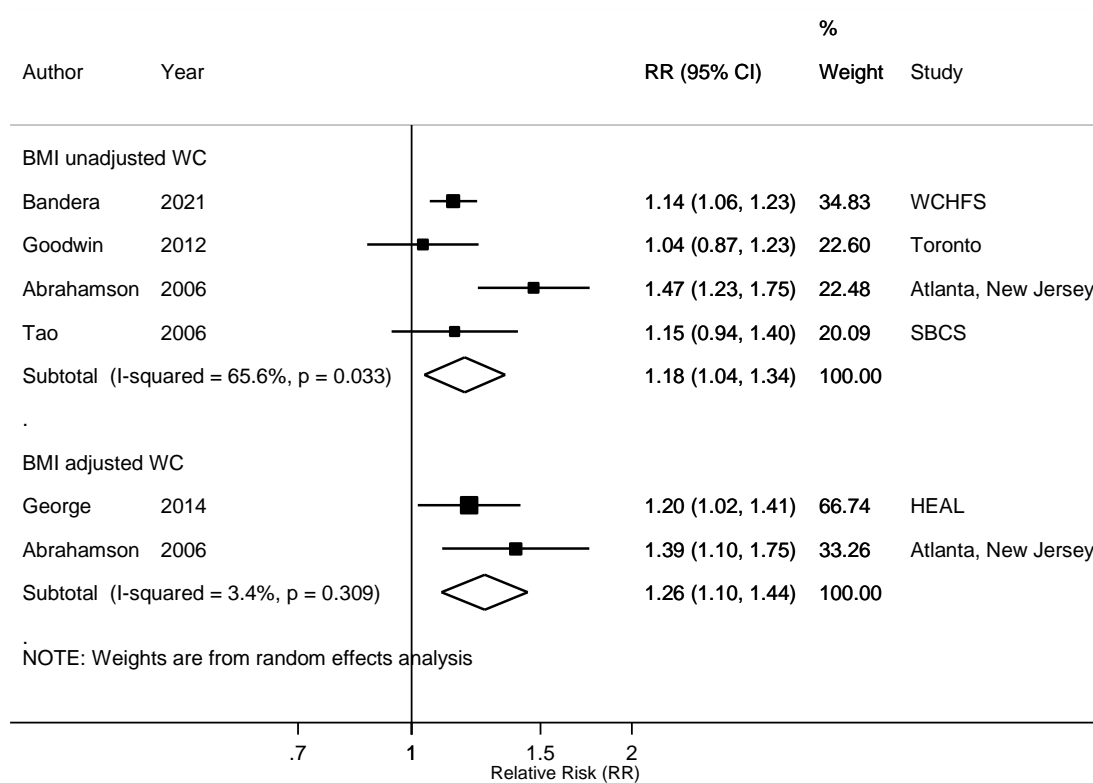

Figure legend: Forest plot shows the linear dose-response results (per 10 cm) by BMI adjustment from the inverse variance DerSimonian-Laird random-effects model. Diamond represents the summary relative risk (RR) estimate and its width as the 95% confidence interval (CI). Each square and the horizontal line across the square represents the RR estimate and its 95% CI of the individual study.

**Supplementary Figure S13 Relative risk of all-cause mortality per 0.1 increase of post-diagnosis waist-hip-ratio by BMI adjustment**

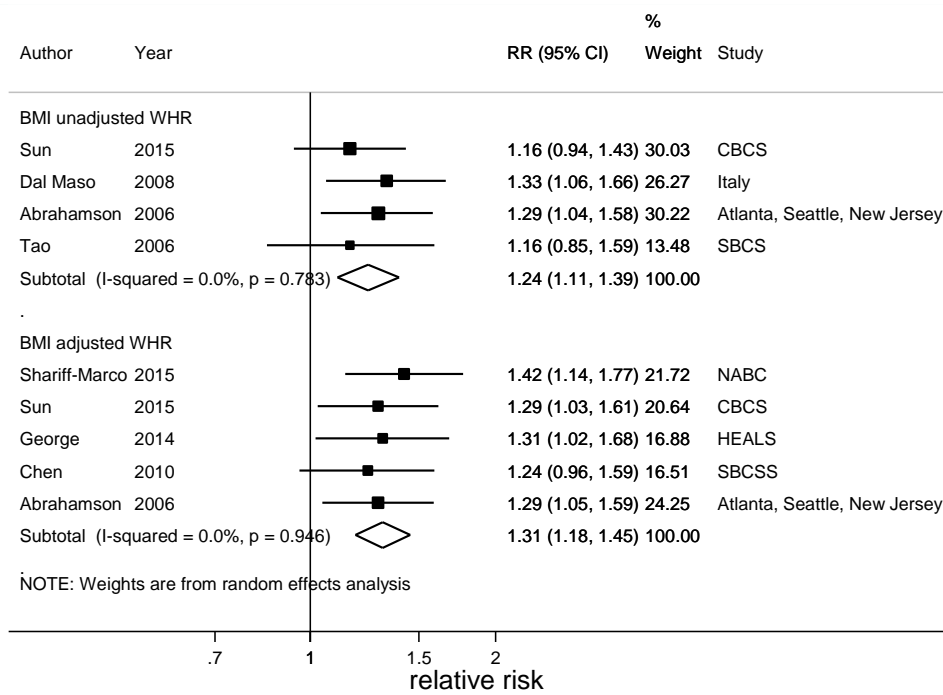

**Supplementary Figure S14 Relative risk of breast cancer-specific mortality per 0.1 increase of post-diagnosis waist-hip-ratio by BMI adjustment**

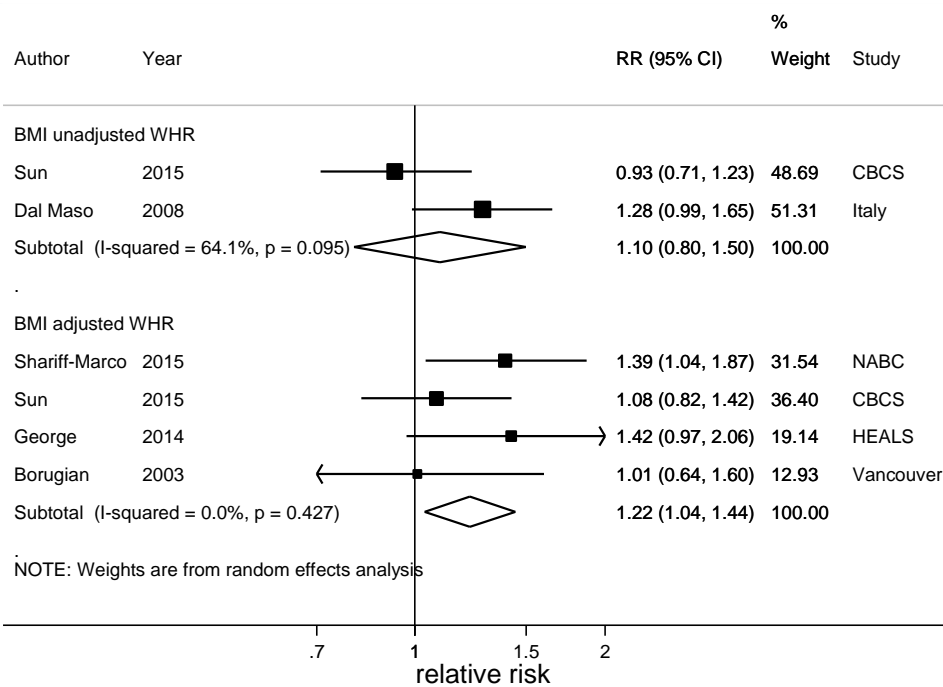

Figure legend: Forest plot shows the linear dose-response results (per 0.1 unit) by BMI adjustment from the inverse variance DerSimonian-Laird random-effects model. Diamond represents the summary relative risk (RR) estimate and its width as the 95% confidence interval (CI). Each square and the horizontal line across the square represents the RR estimate and its 95% CI of the individual study.



### Supplementary Figure S15 Forest plot for the comparison of the highest versus lowest category of post-diagnosis waist circumference and breast cancer outcomes

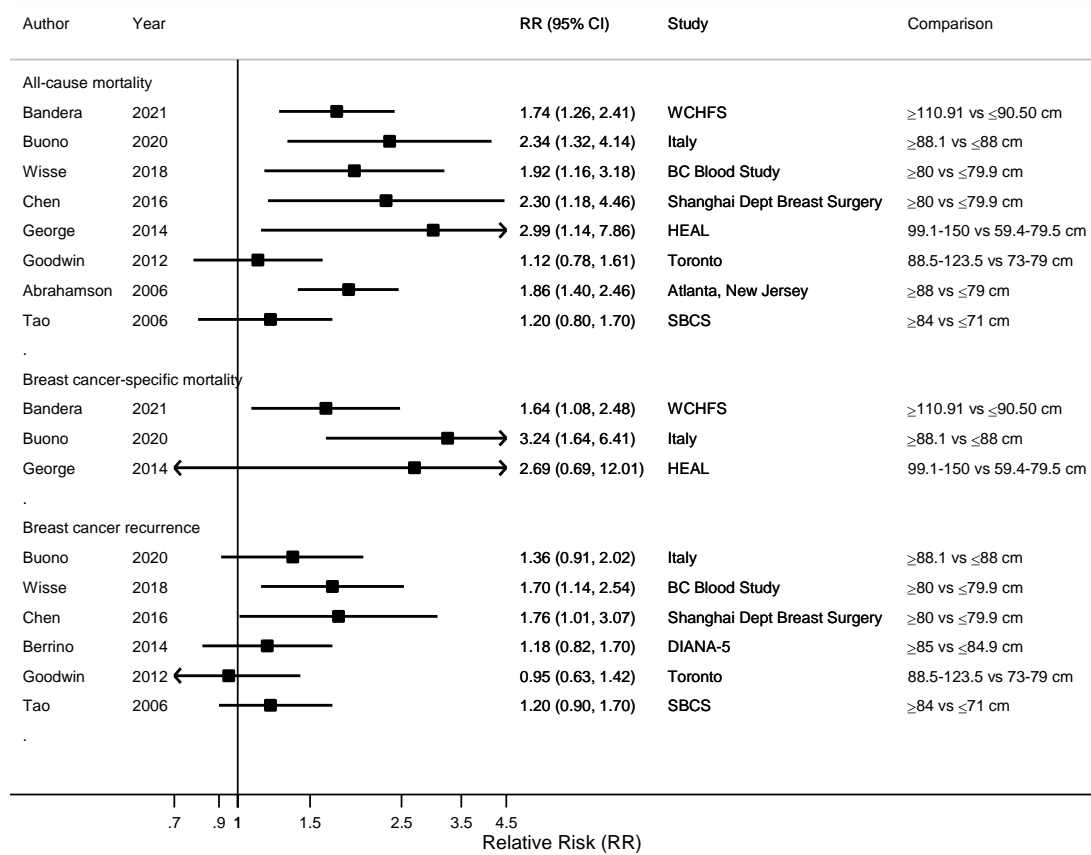

Figure legend: Forest plot shows the results for the highest versus lowest waist circumference categories. Each square and the horizontal line across the square represents the relative risk (RR) estimate and its 95% confidence interval (CI) for the breast cancer outcome investigated in the individual study.

The results were not adjusted for BMI in Bandera, 2021<sup>118</sup>, Buono, 2020<sup>255</sup>, Wisse, 2018<sup>207</sup>, Chen, 2016<sup>151</sup>, Berino, 2014<sup>143</sup>, Goodwin, 2012<sup>72</sup>, Abrahamson, 2006<sup>39</sup>, and Tao, 2006<sup>112</sup>. The results were adjusted for BMI in George, 2014<sup>71</sup>.

Wisse, 2018<sup>207</sup> (RR ≥80 vs < 80 cm 1.34, 95% CI: 0.70-2.54 for all-cause mortality and 1.45, 95% CI: 0.89-2.38 for breast cancer recurrence) and Abrahamson, 2006<sup>39</sup> (RR ≥88 vs < 80 cm 1.75, 95% CI: 1.20-2.55 for all-cause mortality) further reported BMI adjusted results. In addition, Williams, 2014<sup>117</sup> reported BMI unadjusted dose-response results for breast cancer-specific mortality (RR 1.01, 95% CI: 0.98 - 1.05 per 1 cm).

**Supplementary Figure S16 Relative risk (95% CI) of all-cause mortality by categorical comparison of pre- to post-diagnosis weight change**

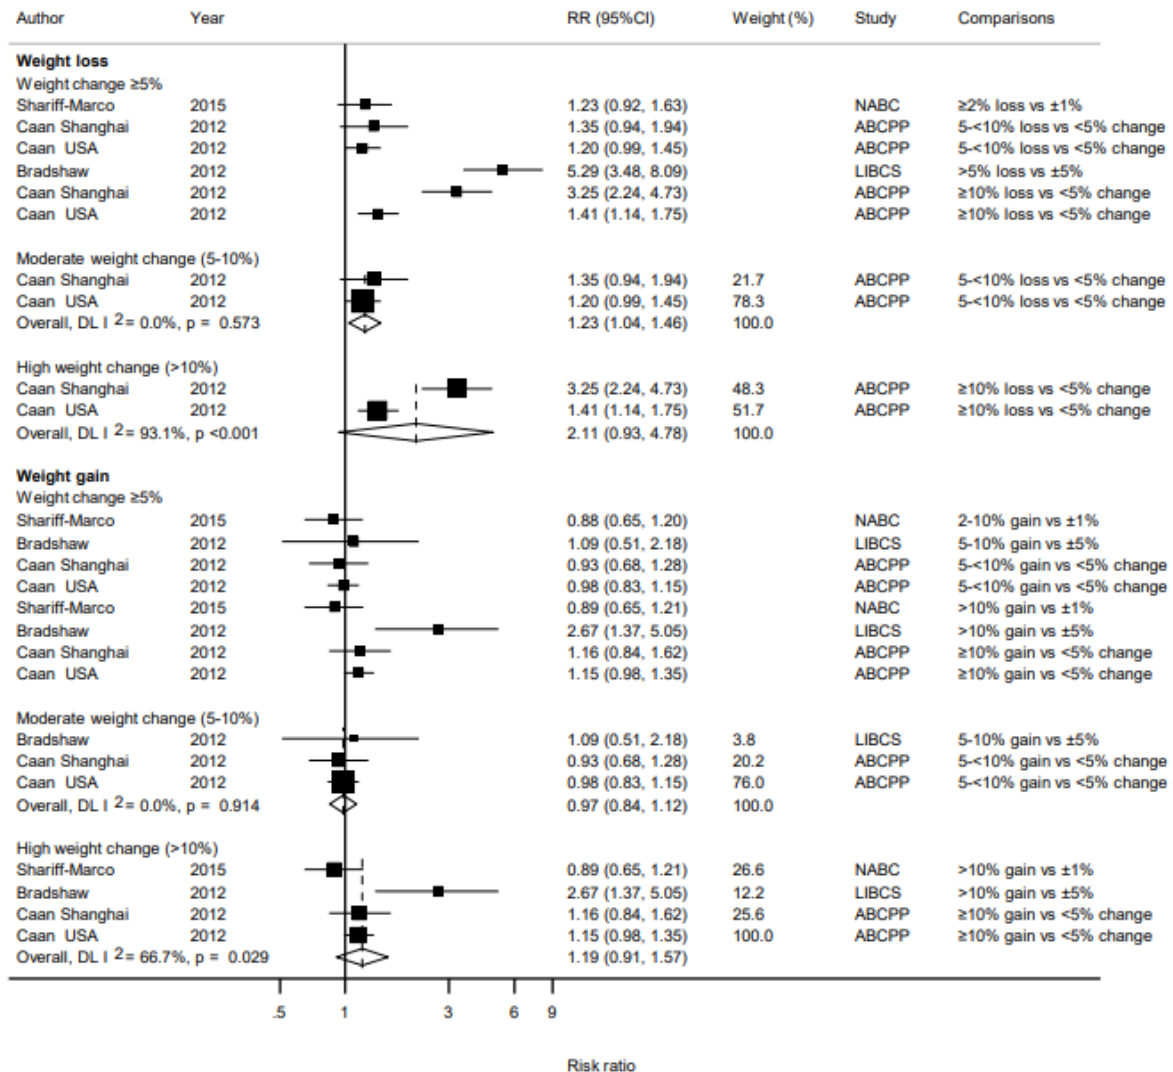

Figure legend: Forest plot shows the results for relative weight change (%) comparing to stable weight, with each square and the horizontal line across the square representing the relative risk (RR) estimate and its 95% confidence interval (CI) of the individual study. The upper panel shows all the results for weight loss. The middle panel shows all the results for weight gain. The results for comparable weight change categories were then pooled in inverse variance DerSimonian-Laird random-effects meta-analyses, with the diamonds representing the summary RR estimates and their width as the 95% CIs.

**Supplementary Figure S17 Relative risk (95% CI) of breast cancer-specific mortality by categorical comparison of pre- to post-diagnosis weight change**

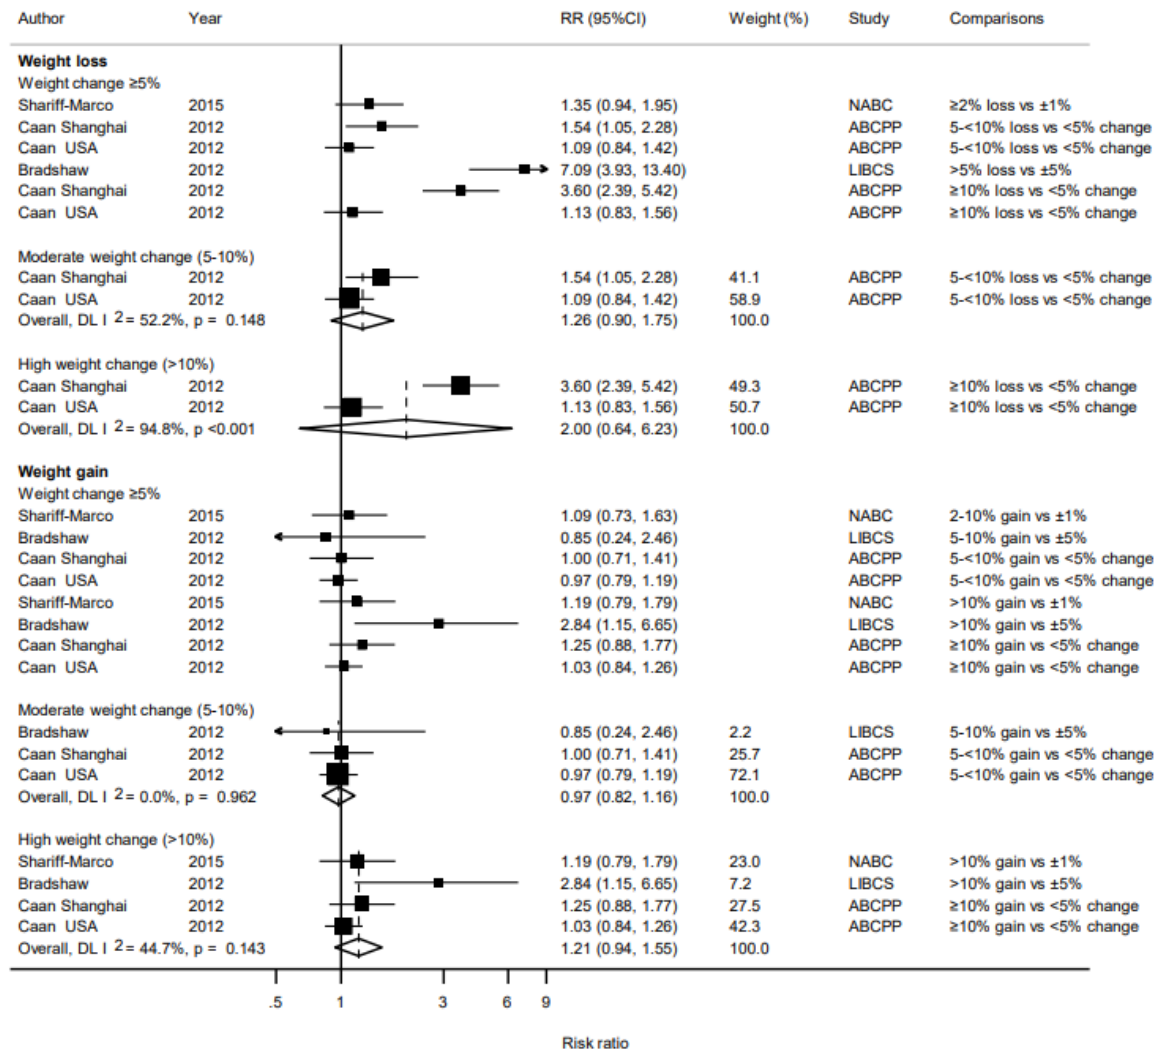

Figure legend: Forest plot shows the results for relative weight change (%) comparing to stable weight, with each square and its horizontal line across the square representing the relative risk (RR) estimate and its 95% confidence interval (CI) of the individual study. The upper panel shows all the results for weight loss. The middle panel shows all the results for weight gain. The results for comparable weight change categories were then pooled in inverse variance DerSimonian-Laird random-effects meta-analyses, with the diamonds representing the summary RR estimates and their width as the 95% CIs.

## Supplementary Figure S18 Forest plot for post-diagnosis weight change and breast cancer outcomes

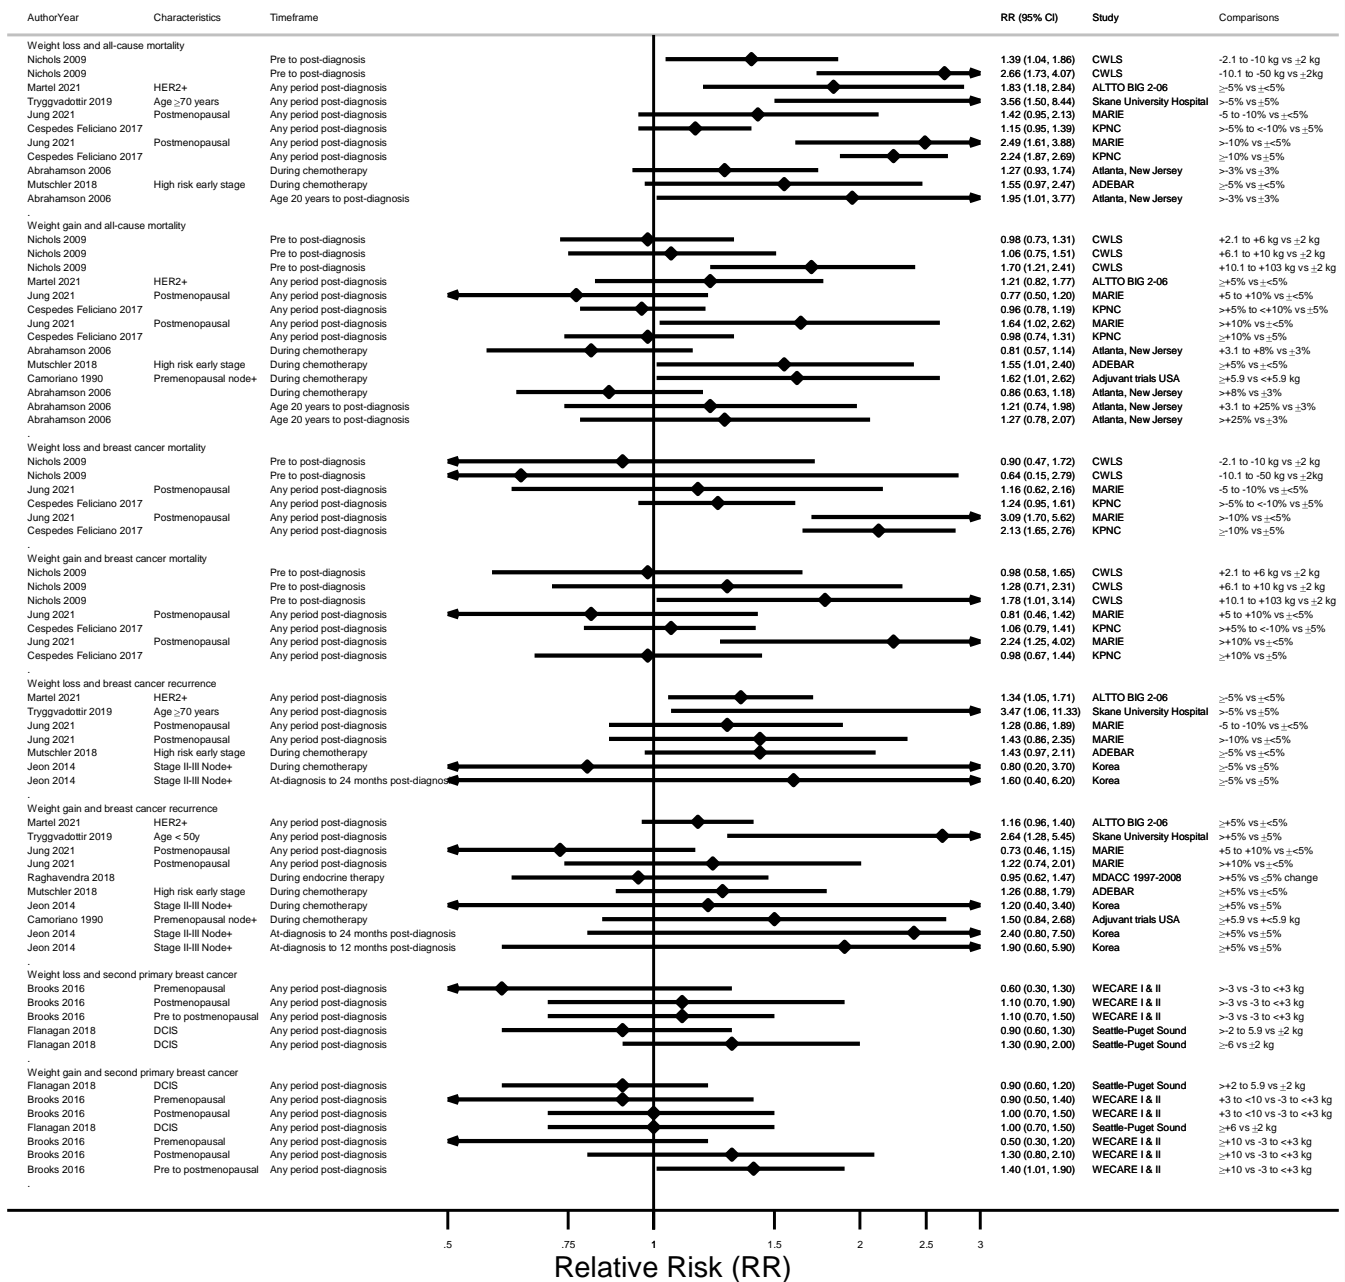

Figure legend: Forest plot shows the results for absolute (kg) or relative weight change (%) comparing to stable weight during any period post-diagnosis or specifically during cancer treatment, with each diamond and the horizontal line across the diamond representing the relative risk (RR) estimate and its 95% confidence interval (CI) of the individual study.

Two studies reporting results on pre- to post-diagnosis weight change but were not compatible with the other studies on the topic (Supplementary figures 16 and 17)<sup>39, 100</sup> are also presented. One additional study reported results on weight variation (>5 vs <5% change) from before to after chemotherapy (HRs = 2.11, 95% CI 1.21-3.66 for all-cause mortality and 2.28, 1.29-4.03 for disease-free survival)<sup>204</sup>. DCIS, ductal carcinoma in situ; HER2, human epidermal growth factor receptor 2.

## Supplementary Figure S19 Forest plot for post-diagnosis BMI change and breast cancer outcomes

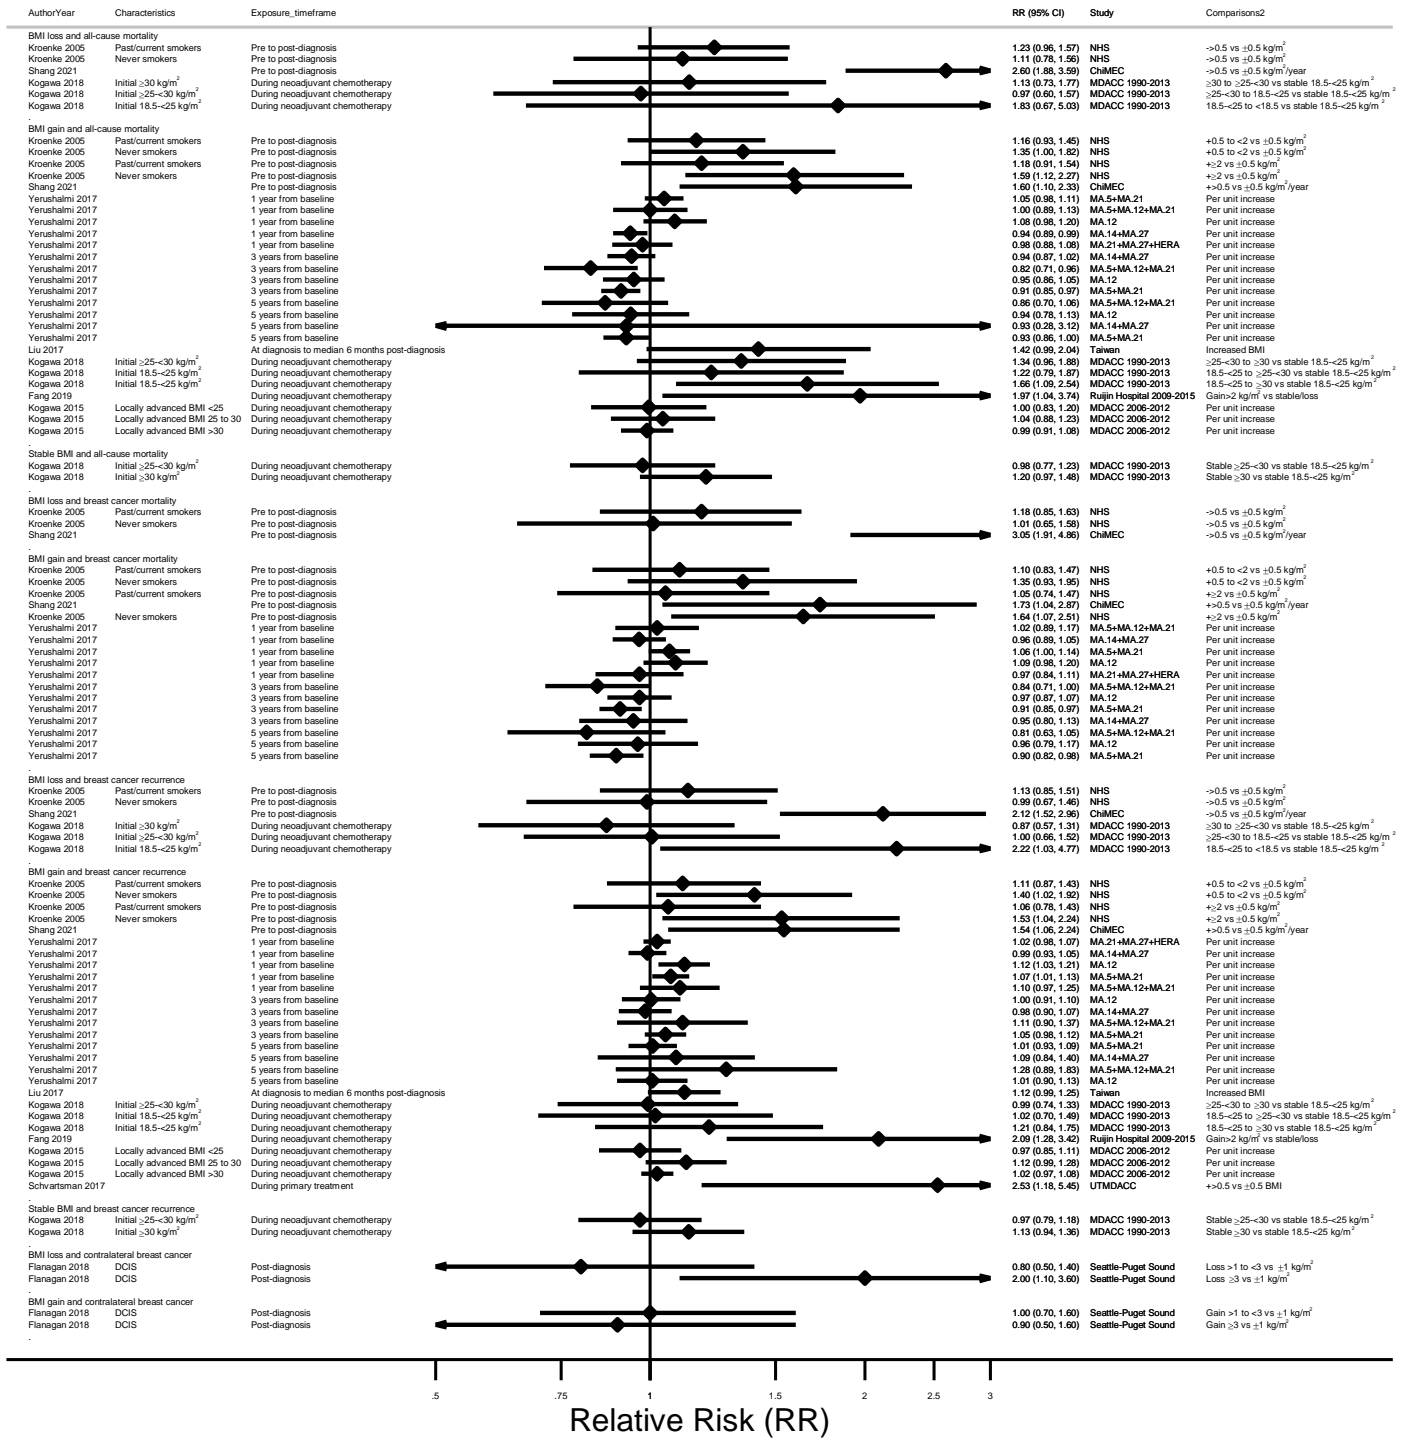

Figure legend: Forest plot shows the results for BMI change from before diagnosis to one or more years after diagnosis (pre- to post-diagnosis), during any period post-diagnosis, or specifically during cancer treatment, with each diamond and the horizontal line across the diamond representing the relative risk (RR) estimate and its 95% confidence interval (CI) of the individual study.

All results, including the results for categorical comparison for different BMI change (kg/m<sup>2</sup>) versus stable BMI reported in seven studies<sup>132, 177, 178, 200, 225, 236, 254</sup> and the dose-response results (per unit increase) for BMI change at 1, 3, or 5 years<sup>211</sup> or by initial BMI status<sup>84</sup> reported in two studies without categorical comparison are displayed. One additional study reported results on BMI variation (>5.71 vs ≤5.71% change) after cancer treatment (HR 1.018, 95% CI: 1.002-1.034 for risk of recurrence)<sup>160</sup>. DCIS, ductal carcinoma in situ.

**Supplementary Figure S20 Forest plot for breast cancer recurrence by categorical comparison of pre- to post-diagnosis weight change**

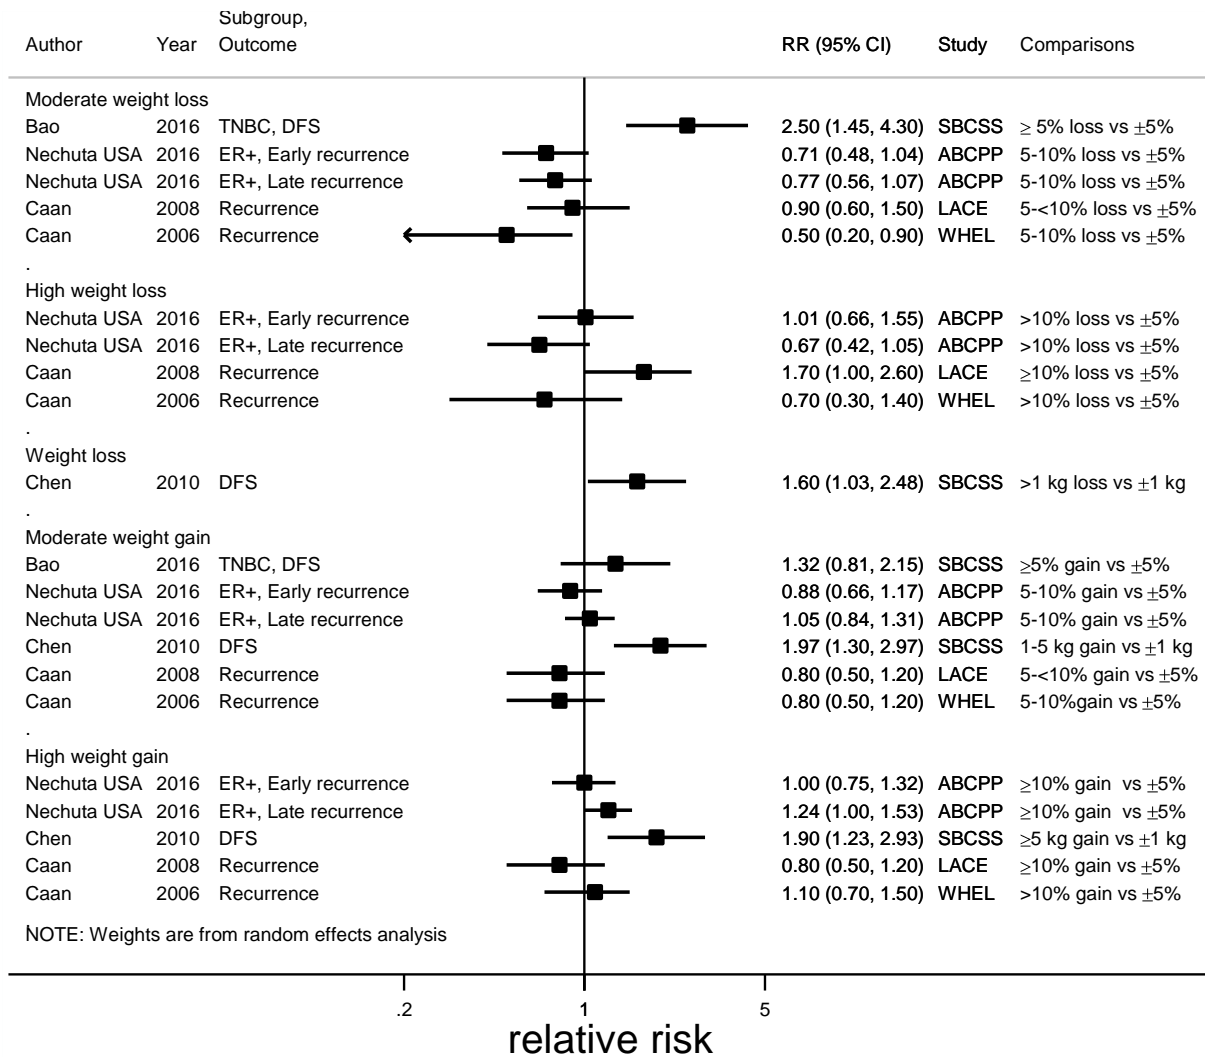

Figure legend: Forest plot shows the results for pre- to post-diagnosis absolute (kg) or relative weight change (%) comparing to stable weight, with each square and the horizontal line across the square representing the relative risk (RR) estimate and its 95% confidence interval (CI) of the individual study. DFS, disease-free survival; ER, oestrogen receptor; TNBC, triple-negative breast cancer.

**Supplementary Figure S21 Funnel plot of A. all studies B. all but three small studies included in the dose response meta-analysis of post-diagnosis body mass index and risk of breast cancer-specific mortality**

A. All studies

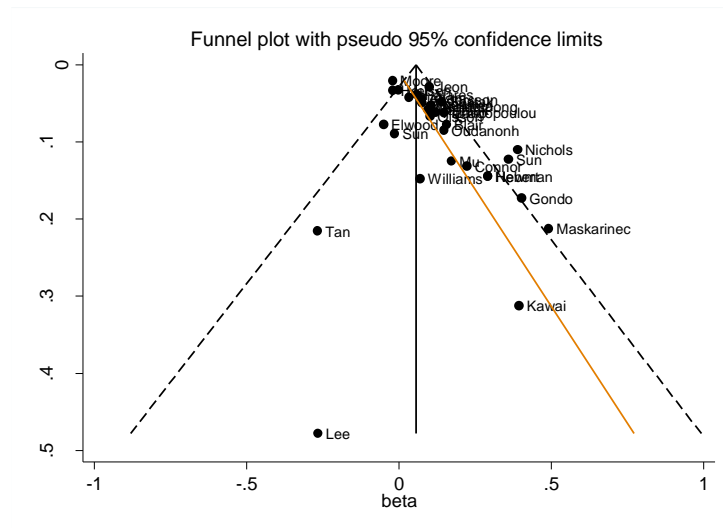

P Egger's test = 0.001

B. Excluded three small studies (Lee, 2012<sup>86</sup>, Kawai, 2012<sup>82</sup>, and Maskarinec, 2011<sup>93</sup>) from the funnel plot for clarity.

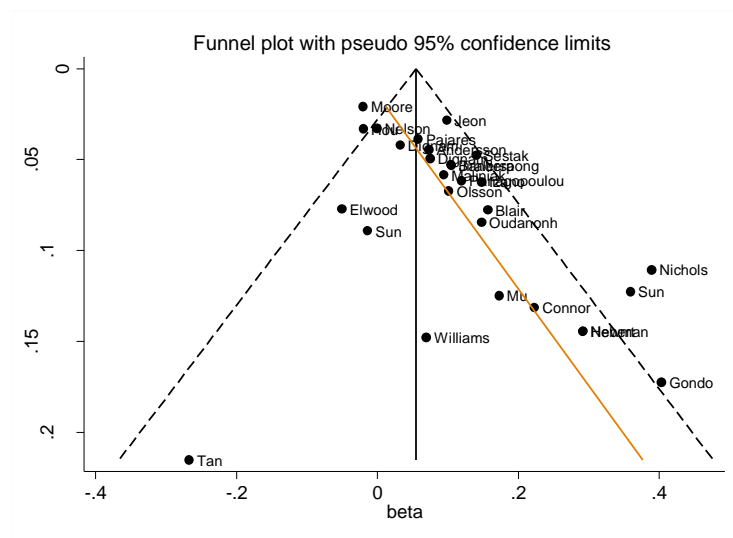

Figure legend: Each point represents the logarithm of relative risk estimate (RR) (x-axis) against its standard error as measure of study size (y-axis). Solid vertical line is the summary estimate of  $\ln(\text{RR})$  from the fixed effect meta-analysis. Dashed lines are the 95% confidence limits around  $\ln(\text{RR})$ . Orange line shows the regression test for funnel-plot asymmetry proposed by Egger et al.

Supplementary Table S1 PRISMA 2009 Checklist

| Section/topic             | # | Checklist item                                                                                                                                                                                                                                                                                              | Reported on page #    |
|---------------------------|---|-------------------------------------------------------------------------------------------------------------------------------------------------------------------------------------------------------------------------------------------------------------------------------------------------------------|-----------------------|
| <b>TITLE</b>              |   |                                                                                                                                                                                                                                                                                                             |                       |
| Title                     | 1 | Identify the report as a systematic review, meta-analysis, or both.                                                                                                                                                                                                                                         | 1                     |
| <b>ABSTRACT</b>           |   |                                                                                                                                                                                                                                                                                                             |                       |
| Structured summary        | 2 | Provide a structured summary including, as applicable: background; objectives; data sources; study eligibility criteria, participants, and interventions; study appraisal and synthesis methods; results; limitations; conclusions and implications of key findings; systematic review registration number. | 3                     |
| <b>INTRODUCTION</b>       |   |                                                                                                                                                                                                                                                                                                             |                       |
| Rationale                 | 3 | Describe the rationale for the review in the context of what is already known.                                                                                                                                                                                                                              | 4                     |
| Objectives                | 4 | Provide an explicit statement of questions being addressed with reference to participants, interventions, comparisons, outcomes, and study design (PICOS).                                                                                                                                                  | 4                     |
| <b>METHODS</b>            |   |                                                                                                                                                                                                                                                                                                             |                       |
| Protocol and registration | 5 | Indicate if a review protocol exists, if and where it can be accessed (e.g., Web address), and, if available, provide registration information including registration number.                                                                                                                               | 4 Protocol is online  |
| Eligibility criteria      | 6 | Specify study characteristics (e.g., PICOS, length of follow-up) and report characteristics (e.g., years considered, language, publication status) used as criteria for eligibility, giving rationale.                                                                                                      | 5, supplementary text |
| Information sources       | 7 | Describe all information sources (e.g., databases with dates of coverage, contact with study authors to identify additional studies) in the search and date last searched.                                                                                                                                  | 5, supplementary text |
| Search                    | 8 | Present full electronic search strategy for at least one database, including any limits used, such that it could be repeated.                                                                                                                                                                               | Supplementary text    |



| Section/topic                      | #  | Checklist item                                                                                                                                                                                                         | Reported on page #      |
|------------------------------------|----|------------------------------------------------------------------------------------------------------------------------------------------------------------------------------------------------------------------------|-------------------------|
| Study selection                    | 9  | State the process for selecting studies (i.e., screening, eligibility, included in systematic review, and, if applicable, included in the meta-analysis).                                                              | 5, supplementary text   |
| Data collection process            | 10 | Describe method of data extraction from reports (e.g., piloted forms, independently, in duplicate) and any processes for obtaining and confirming data from investigators.                                             | 5, supplementary text   |
| Data items                         | 11 | List and define all variables for which data were sought (e.g., PICOS, funding sources) and any assumptions and simplifications made.                                                                                  | Supplementary text      |
| Risk of bias in individual studies | 12 | Describe methods used for assessing risk of bias of individual studies (including specification of whether this was done at the study or outcome level), and how this information is to be used in any data synthesis. | 5, supplementary text   |
| Summary measures                   | 13 | State the principal summary measures (e.g., risk ratio, difference in means).                                                                                                                                          | 5-6, supplementary text |
| Synthesis of results               | 14 | Describe the methods of handling data and combining results of studies, if done, including measures of consistency (e.g., $I^2$ ) for each meta-analysis.                                                              | 6, supplementary text   |
| Risk of bias across studies        | 15 | Specify any assessment of risk of bias that may affect the cumulative evidence (e.g., publication bias, selective reporting within studies).                                                                           | 6, supplementary text   |
| Additional analyses                | 16 | Describe methods of additional analyses (e.g., sensitivity or subgroup analyses, meta-regression), if done, indicating which were pre-specified.                                                                       | 6, supplementary text   |
| <b>RESULTS</b>                     |    |                                                                                                                                                                                                                        |                         |

| Section/topic                 | #  | Checklist item                                                                                                                                                                                           | Reported on page #                      |
|-------------------------------|----|----------------------------------------------------------------------------------------------------------------------------------------------------------------------------------------------------------|-----------------------------------------|
| Study selection               | 17 | Give numbers of studies screened, assessed for eligibility, and included in the review, with reasons for exclusions at each stage, ideally with a flow diagram.                                          | 7, figure 1                             |
| Study characteristics         | 18 | For each study, present characteristics for which data were extracted (e.g., study size, PICOS, follow-up period) and provide the citations.                                                             | Supplementary tables 4-8                |
| Risk of bias within studies   | 19 | Present data on risk of bias of each study and, if available, any outcome level assessment (see item 12).                                                                                                | Overall quality discussed 13-14         |
| Results of individual studies | 20 | For all outcomes considered (benefits or harms), present, for each study: (a) simple summary data for each intervention group (b) effect estimates and confidence intervals, ideally with a forest plot. | Figures 2-3, supplementary figures 1-20 |
| Synthesis of results          | 21 | Present results of each meta-analysis done, including confidence intervals and measures of consistency.                                                                                                  | 7-11                                    |
| Risk of bias across studies   | 22 | Present results of any assessment of risk of bias across studies (see Item 15).                                                                                                                          | 11                                      |
| Additional analysis           | 23 | Give results of additional analyses, if done (e.g., sensitivity or subgroup analyses, meta-regression [see Item 16]).                                                                                    | 8-9, table 2,3                          |
| <b>DISCUSSION</b>             |    |                                                                                                                                                                                                          |                                         |
| Summary of evidence           | 24 | Summarize the main findings including the strength of evidence for each main outcome; consider their relevance to key groups (e.g., healthcare providers, users, and policy makers).                     | 11-14, table 1                          |
| Limitations                   | 25 | Discuss limitations at study and outcome level (e.g., risk of bias), and at review-level (e.g., incomplete retrieval of identified research, reporting bias).                                            | 12-14                                   |
| Conclusions                   | 26 | Provide a general interpretation of the results in the context of other evidence, and implications for future research.                                                                                  | 15                                      |
| <b>FUNDING</b>                |    |                                                                                                                                                                                                          |                                         |
| Funding                       | 27 | Describe sources of funding for the systematic review and other support (e.g., supply of data); role of funders for the systematic review.                                                               | 16-17                                   |

**Supplementary Table S2 Grading criteria for evidence on diet, nutrition, physical activity and survival in women with breast cancer**

| Evidence grades                                                                                                                                                                                                                                                                                                                                                                                                                                                                                                                                                                                                                                                                                                                                                                                                                                                                                                                                                                                                                                                                                                                                                                                                                                                                         |                                     | GRADING CRITERIA FOR EVIDENCE ON DIET, NUTRITION, PHYSICAL ACTIVITY AND SURVIVAL IN WOMEN WITH BREAST CANCER                                                                                                                                                                                                                                                        | Het  | PB | Mec          |
|-----------------------------------------------------------------------------------------------------------------------------------------------------------------------------------------------------------------------------------------------------------------------------------------------------------------------------------------------------------------------------------------------------------------------------------------------------------------------------------------------------------------------------------------------------------------------------------------------------------------------------------------------------------------------------------------------------------------------------------------------------------------------------------------------------------------------------------------------------------------------------------------------------------------------------------------------------------------------------------------------------------------------------------------------------------------------------------------------------------------------------------------------------------------------------------------------------------------------------------------------------------------------------------------|-------------------------------------|---------------------------------------------------------------------------------------------------------------------------------------------------------------------------------------------------------------------------------------------------------------------------------------------------------------------------------------------------------------------|------|----|--------------|
| Strong evidence                                                                                                                                                                                                                                                                                                                                                                                                                                                                                                                                                                                                                                                                                                                                                                                                                                                                                                                                                                                                                                                                                                                                                                                                                                                                         | Convincing                          | Evidence of an effect from a meta-analysis of RCTs or at least two well-designed independent RCTs                                                                                                                                                                                                                                                                   | No   | No | Desirable    |
|                                                                                                                                                                                                                                                                                                                                                                                                                                                                                                                                                                                                                                                                                                                                                                                                                                                                                                                                                                                                                                                                                                                                                                                                                                                                                         | Probable                            | Evidence of an effect from a meta-analysis of RCTs or two well-designed RCTs                                                                                                                                                                                                                                                                                        | Some | No | Desirable    |
|                                                                                                                                                                                                                                                                                                                                                                                                                                                                                                                                                                                                                                                                                                                                                                                                                                                                                                                                                                                                                                                                                                                                                                                                                                                                                         |                                     | OR Evidence of an effect from one well-designed RCT and one well-designed cohort study                                                                                                                                                                                                                                                                              | No   | No | Required     |
|                                                                                                                                                                                                                                                                                                                                                                                                                                                                                                                                                                                                                                                                                                                                                                                                                                                                                                                                                                                                                                                                                                                                                                                                                                                                                         |                                     | OR Evidence from at least one well-designed pooled analysis of follow-up studies                                                                                                                                                                                                                                                                                    | No   | No | Required     |
|                                                                                                                                                                                                                                                                                                                                                                                                                                                                                                                                                                                                                                                                                                                                                                                                                                                                                                                                                                                                                                                                                                                                                                                                                                                                                         |                                     | OR Evidence from at least two independent well-designed follow-up studies                                                                                                                                                                                                                                                                                           | No   | No | Required     |
| Limited evidence                                                                                                                                                                                                                                                                                                                                                                                                                                                                                                                                                                                                                                                                                                                                                                                                                                                                                                                                                                                                                                                                                                                                                                                                                                                                        | Limited suggestive                  | Evidence from a meta-analysis of RCTs or at least two well-designed RCTs but the confidence interval may include the null                                                                                                                                                                                                                                           | Some | No | Not required |
|                                                                                                                                                                                                                                                                                                                                                                                                                                                                                                                                                                                                                                                                                                                                                                                                                                                                                                                                                                                                                                                                                                                                                                                                                                                                                         |                                     | OR Evidence from one well-designed RCT but the confidence interval may include the null                                                                                                                                                                                                                                                                             | No   | No | Required     |
|                                                                                                                                                                                                                                                                                                                                                                                                                                                                                                                                                                                                                                                                                                                                                                                                                                                                                                                                                                                                                                                                                                                                                                                                                                                                                         |                                     | OR Evidence of an effect from a pooled analysis of follow-up studies                                                                                                                                                                                                                                                                                                | Some | No | Not required |
|                                                                                                                                                                                                                                                                                                                                                                                                                                                                                                                                                                                                                                                                                                                                                                                                                                                                                                                                                                                                                                                                                                                                                                                                                                                                                         |                                     | OR Evidence from a pooled analysis of follow-up studies but the confidence interval may include the null                                                                                                                                                                                                                                                            | Some | No | Required     |
|                                                                                                                                                                                                                                                                                                                                                                                                                                                                                                                                                                                                                                                                                                                                                                                                                                                                                                                                                                                                                                                                                                                                                                                                                                                                                         |                                     | OR Evidence of an effect from at least one follow-up study                                                                                                                                                                                                                                                                                                          | No   | No | Required     |
|                                                                                                                                                                                                                                                                                                                                                                                                                                                                                                                                                                                                                                                                                                                                                                                                                                                                                                                                                                                                                                                                                                                                                                                                                                                                                         |                                     | OR Evidence of an effect from at least two follow-up studies                                                                                                                                                                                                                                                                                                        | No   | No | Not required |
|                                                                                                                                                                                                                                                                                                                                                                                                                                                                                                                                                                                                                                                                                                                                                                                                                                                                                                                                                                                                                                                                                                                                                                                                                                                                                         |                                     | OR Evidence from at least two follow-up studies but the confidence interval may include the null                                                                                                                                                                                                                                                                    | Some | No | Required     |
|                                                                                                                                                                                                                                                                                                                                                                                                                                                                                                                                                                                                                                                                                                                                                                                                                                                                                                                                                                                                                                                                                                                                                                                                                                                                                         | Limited – no conclusion             | Any of the following reasons:<br>- Too few studies available<br>- Inconsistency of direction of effect<br>- Poor quality of studies                                                                                                                                                                                                                                 | -    | -  | -            |
| Strong evidence                                                                                                                                                                                                                                                                                                                                                                                                                                                                                                                                                                                                                                                                                                                                                                                                                                                                                                                                                                                                                                                                                                                                                                                                                                                                         | Substantial effect on risk unlikely | Evidence of the absence of an effect (a summary estimate close to 1.0) from any of the following:<br>a) A meta-analysis of RCTs<br>b) At least two well-designed independent RCTs<br>c) A well-designed pooled analysis of follow-up studies<br>d) At least two well-designed follow-up studies<br>- Absence of a dose response relationship (in follow-up studies) | No   | -  | Absence      |
| <p><b>Het:</b> Substantial unexplained heterogeneity or some unexplained heterogeneity<br/> <b>PB:</b> Publication bias<br/> <b>Mec:</b> Strong and plausible mechanistic evidence is required, desirable but not required, not required, or absent<br/> <b>Special upgrading factors:</b><br/> - Presence of a plausible biological gradient ('dose response') in the association. Such a gradient need not be linear or even in the same direction across the different levels of exposure, so long as this can be explained plausibly.<br/> - A particularly large summary effect size (a relative risk of 2.0 or more, or 0.5 or less, depending on the unit of exposure), after appropriate control for confounders.<br/> - Evidence from appropriately controlled experiments demonstrating one or more plausible and specific mechanisms.<br/> - All plausible known residual confounders or biases including reverse causation would reduce a demonstrated effect, or suggest a spurious effect when results show no effect. Special considerations important for evidence for breast cancer survivors including the following potential confounding variables – the type of tumour, type of treatment, amount of treatment received, and the dissemination of the disease.</p> |                                     |                                                                                                                                                                                                                                                                                                                                                                     |      |    |              |

**Supplementary Table S3 Publications included in or excluded from the specific systematic reviews and meta-analyses and reasons of exclusion**

| Publications identified                                        | Publications descriptively reviewed or included in the meta-analyses                                                                                                                                                                                                                                                                                                                                                                                                                                                                                                                                                                                                                                                                                                                                                                                                                        | Publications excluded from the systematic reviews and meta-analyses and reasons of exclusion                                                                                                                                                                                                                                                                                                                                                                                                                                                                                                                                                                                                                                                                                                                                                                                                                                                                                                                                                                                                                                                                                                                                                                                          |
|----------------------------------------------------------------|---------------------------------------------------------------------------------------------------------------------------------------------------------------------------------------------------------------------------------------------------------------------------------------------------------------------------------------------------------------------------------------------------------------------------------------------------------------------------------------------------------------------------------------------------------------------------------------------------------------------------------------------------------------------------------------------------------------------------------------------------------------------------------------------------------------------------------------------------------------------------------------------|---------------------------------------------------------------------------------------------------------------------------------------------------------------------------------------------------------------------------------------------------------------------------------------------------------------------------------------------------------------------------------------------------------------------------------------------------------------------------------------------------------------------------------------------------------------------------------------------------------------------------------------------------------------------------------------------------------------------------------------------------------------------------------------------------------------------------------------------------------------------------------------------------------------------------------------------------------------------------------------------------------------------------------------------------------------------------------------------------------------------------------------------------------------------------------------------------------------------------------------------------------------------------------------|
| <b>Post-diagnosis BMI and all-cause mortality</b>              |                                                                                                                                                                                                                                                                                                                                                                                                                                                                                                                                                                                                                                                                                                                                                                                                                                                                                             |                                                                                                                                                                                                                                                                                                                                                                                                                                                                                                                                                                                                                                                                                                                                                                                                                                                                                                                                                                                                                                                                                                                                                                                                                                                                                       |
| 219 publications                                               | <p>121 publications were reviewed:</p> <ul style="list-style-type: none"> <li>- 57 publications were included in the dose-response meta-analyses<sup>27, 39-46, 53-55, 57, 62-68, 70, 72, 78-82, 84, 85, 88, 89, 91, 93-95, 97, 98, 100, 102, 104, 105, 109, 111-114, 116, 118, 120, 123, 125-127, 129, 130, 135</sup>, including 1 publication<sup>80</sup> in non-linear and 4 publications<sup>27, 42, 61, 62</sup> in subgroup analyses only.</li> <li>- 64 publications did not have enough data to be included in the dose-response meta-analyses<sup>139, 140, 142, 145, 147, 148, 151, 153-157, 159, 161-168, 170, 173, 176, 177, 181, 182, 184, 185, 187, 189-191, 193, 194, 197, 199, 202-204, 207, 209, 213, 219-221, 223, 224, 228-235, 239, 242-244, 248, 250-252</sup>, including 4 publications<sup>165, 168, 190, 199</sup> suitable for subgroup analyses only.</li> </ul> | <p>98 publications:</p> <ul style="list-style-type: none"> <li>- 22 publications superseded by publications from the same or overlapping studies<sup>51, 69, 90, 152, 214, 262, 266, 283, 288, 291, 292, 299, 320, 327, 335, 339, 350, 354, 377, 392, 393, 396</sup></li> <li>-28 publications reported unadjusted relative risk (RR) estimates only<sup>119, 158, 183, 200, 206, 226, 236, 261, 290, 293, 297, 314, 316, 317, 329, 330, 348, 352, 355-357, 366, 368, 376, 379, 381, 382, 391</sup></li> <li>-38 publications did not report a RR estimate or 95% confidence interval<sup>141, 246, 258, 260, 267, 270, 276, 277, 285, 286, 289, 300, 302, 305, 306, 308, 310, 315, 319, 321, 325, 331, 332, 336, 345, 353, 359, 361-363, 369, 370, 375, 380, 389, 394, 395, 400</sup></li> <li>-In 1 new publication, the results appeared erroneous and could not be used in the meta-analyses<sup>372</sup>.</li> <li>-1 publication reported incompatible increment unit<sup>211</sup></li> <li>-2 publications with &lt;100 study participants<sup>341, 349</sup></li> <li>-4 publications examined interaction effect or joint exposures<sup>218, 269, 340, 371</sup></li> <li>-2 publication examined combined pre- and post-diagnosis exposures<sup>225, 301</sup></li> </ul> |
| <b>Post-diagnosis BMI and breast cancer-specific mortality</b> |                                                                                                                                                                                                                                                                                                                                                                                                                                                                                                                                                                                                                                                                                                                                                                                                                                                                                             |                                                                                                                                                                                                                                                                                                                                                                                                                                                                                                                                                                                                                                                                                                                                                                                                                                                                                                                                                                                                                                                                                                                                                                                                                                                                                       |
| 71 publications                                                | <p>51 publications were reviewed:</p> <ul style="list-style-type: none"> <li>- 33 publications were included in the dose-response meta-analyses<sup>51, 57, 63-65, 74, 75, 77-79, 82, 86, 91, 93, 95, 96, 98-103, 106, 109, 110, 117, 118, 122, 125, 126, 128, 134, 137</sup>, including 2 publications in subgroup analysis only<sup>51, 134</sup>.</li> <li>-18 publications did not have enough data to be included in the dose-response meta-analyses<sup>83, 150, 153, 159, 167, 168, 174, 179, 180, 188, 192, 203, 205, 206, 223, 227, 232, 243</sup>; including 2 publications suitable for subgroup analyses only<sup>153, 168</sup>.</li> </ul>                                                                                                                                                                                                                                    | <p>20 publications:</p> <ul style="list-style-type: none"> <li>- 2 publications superseded by publications from the same or overlapping studies<sup>189, 339</sup></li> <li>- 6 publications reported unadjusted relative risk (RR) estimates only<sup>89, 261, 326, 348, 356, 383</sup></li> <li>- 5 publications did not report a RR estimate or 95% confidence interval<sup>183, 281, 282, 306, 369</sup></li> <li>- 1 publication reported incompatible increment unit<sup>211</sup></li> <li>- 1 new publication examined joint exposure<sup>218</sup></li> <li>- 5 publications examined combined pre- and post-diagnosis exposures<sup>225, 278, 294, 301, 413</sup></li> </ul>                                                                                                                                                                                                                                                                                                                                                                                                                                                                                                                                                                                                |
| <b>Post-diagnosis BMI and breast cancer recurrence</b>         |                                                                                                                                                                                                                                                                                                                                                                                                                                                                                                                                                                                                                                                                                                                                                                                                                                                                                             |                                                                                                                                                                                                                                                                                                                                                                                                                                                                                                                                                                                                                                                                                                                                                                                                                                                                                                                                                                                                                                                                                                                                                                                                                                                                                       |
| 244 publications                                               | <p>130 publications were reviewed:</p> <ul style="list-style-type: none"> <li>- 55 publications were included in the dose-response meta-analyses<sup>27, 40-46, 48, 51, 54-56, 59, 62-66, 68-70, 72-74, 76, 79, 83-85, 88, 89, 92, 94, 96, 102, 104, 106, 110, 112, 115, 116, 119-125, 127, 130, 131, 133, 136</sup>, including 3 publications<sup>27, 119, 133</sup> in non-linear and 3 publications<sup>42, 61, 62</sup> in subgroup analyses only.</li> <li>- 75 publications did not have enough data to be included in the dose-response meta-analyses<sup>111, 129, 139, 141, 144, 145, 151, 152, 155-159, 161, 162, 164, 165, 169, 170,</sup></li> </ul>                                                                                                                                                                                                                            | <p>114 publications:</p> <ul style="list-style-type: none"> <li>-30 publications superseded by publications from the same or overlapping studies<sup>90, 146, 148, 214, 227, 240, 266, 274, 280, 283, 291, 292, 296, 298, 299, 303, 307, 327, 333, 339, 350, 354, 377, 386-388, 390, 392, 393, 396</sup></li> <li>-32 publications reported unadjusted relative risk (RR) estimates only<sup>86, 160, 172, 200, 206, 232, 261, 290, 293, 295, 297, 314, 316, 317, 323, 329, 337, 348, 352, 357, 359, 364, 366, 373, 374, 376, 379, 381-384, 398</sup></li> </ul>                                                                                                                                                                                                                                                                                                                                                                                                                                                                                                                                                                                                                                                                                                                      |

| Publications identified                                                | Publications descriptively reviewed or included in the meta-analyses                                                                                                                                                                                                              | Publications excluded from the systematic reviews and meta-analyses and reasons of exclusion                                                                                                                                                                                                                                                                                                                                                                                                                                                                                                                                                                                                                                   |
|------------------------------------------------------------------------|-----------------------------------------------------------------------------------------------------------------------------------------------------------------------------------------------------------------------------------------------------------------------------------|--------------------------------------------------------------------------------------------------------------------------------------------------------------------------------------------------------------------------------------------------------------------------------------------------------------------------------------------------------------------------------------------------------------------------------------------------------------------------------------------------------------------------------------------------------------------------------------------------------------------------------------------------------------------------------------------------------------------------------|
|                                                                        | 173, 174, 176, 177, 181, 183-185, 187, 189-191, 193, 194, 196, 199, 201-205, 207, 208, 210, 212, 213, 215-217, 219-224, 226, 228-230, 233, 234, 236-239, 241-243, 245-251, 253, including 5 publications suitable for subgroup analysis only <sup>129, 165, 190, 199, 229</sup> . | <p>-38 publications did not report a RR estimate or 95% confidence interval<sup>260, 265, 268, 272, 277, 284, 286, 289, 300, 311, 313, 318, 319, 321, 328, 331, 332, 336, 338, 343, 344, 346, 351, 353, 358, 361, 362, 365, 367, 369, 370, 375, 380, 385, 389, 394, 395, 400</sup></p> <p>-1 publication reported incompatible increment unit<sup>211</sup></p> <p>- 6 publications examined interaction effect<sup>218, 269, 271, 371, 378, 397</sup></p> <p>-4 publications examined combined pre- and post-diagnosis exposures<sup>225, 278, 301, 360</sup></p> <p>-Results in 2 publications appeared erroneous<sup>113, 372</sup></p> <p>-1 publication included male and female breast cancer patients<sup>259</sup></p> |
| <b>Post-diagnosis BMI and second primary breast cancer</b>             |                                                                                                                                                                                                                                                                                   |                                                                                                                                                                                                                                                                                                                                                                                                                                                                                                                                                                                                                                                                                                                                |
| 16 publications                                                        | 10 publications were reviewed:<br>- 8 publications were included in the dose-response meta-analysis <sup>58, 63, 64, 87, 90, 108, 132, 138</sup> .<br>- 2 publications did not have enough data to be included in the dose-response meta-analysis <sup>171, 186</sup> .           | 6 publications:<br>-2 publications superseded by another publication from the same study <sup>89, 275</sup><br>-2 publications reported insufficient results <sup>343, 399</sup><br>-1 publication on DCIS survivors, investigating BMI and any second breast cancer (secondary breast and second primary breast cancers) as outcome <sup>312</sup><br>- 1 publication examined combined pre- and post-diagnosis exposures <sup>412</sup>                                                                                                                                                                                                                                                                                      |
| <b>Post-diagnosis BMI and non-breast cancer-related mortality</b>      |                                                                                                                                                                                                                                                                                   |                                                                                                                                                                                                                                                                                                                                                                                                                                                                                                                                                                                                                                                                                                                                |
| 10 publications                                                        | 8 publications were reviewed:<br>- 7 publications were included in the dose-response meta-analysis <sup>57, 63-65, 77, 95, 106</sup> .<br>- 1 publication did not have enough data to be included in the dose-response meta-analysis <sup>159</sup> .                             | 2 publications:<br>-1 publication reported unadjusted relative risk (RR) estimates only <sup>342</sup><br>-1 publication reported insufficient results <sup>279</sup>                                                                                                                                                                                                                                                                                                                                                                                                                                                                                                                                                          |
| <b>Post-diagnosis BMI and cardiovascular mortality</b>                 |                                                                                                                                                                                                                                                                                   |                                                                                                                                                                                                                                                                                                                                                                                                                                                                                                                                                                                                                                                                                                                                |
| 2 publications                                                         | 2 publications were included in the dose-response meta-analysis <sup>100, 114</sup>                                                                                                                                                                                               | -                                                                                                                                                                                                                                                                                                                                                                                                                                                                                                                                                                                                                                                                                                                              |
| <b>Post-diagnosis waist circumference (WC) and all-cause mortality</b> |                                                                                                                                                                                                                                                                                   |                                                                                                                                                                                                                                                                                                                                                                                                                                                                                                                                                                                                                                                                                                                                |
| 9 publications                                                         | 8 publications were reviewed:<br>-5 publications were included in the dose-response meta-analyses <sup>39, 71, 72, 112, 118</sup><br>-3 publications (1 new) did not have enough data to be included in the dose-response meta-analyses <sup>151, 207, 255</sup>                  | -1 publication examined combined pre- and post-diagnosis exposures <sup>304</sup>                                                                                                                                                                                                                                                                                                                                                                                                                                                                                                                                                                                                                                              |
| <b>Post-diagnosis WC and breast cancer-specific mortality</b>          |                                                                                                                                                                                                                                                                                   |                                                                                                                                                                                                                                                                                                                                                                                                                                                                                                                                                                                                                                                                                                                                |
| 5 publications                                                         | 4 publications were reviewed:<br>-3 publications were included in the dose-response meta-analysis <sup>71, 117, 118</sup><br>-1 publication did not have enough data to be included in the dose-response meta-analysis <sup>255</sup>                                             | -1 publication examined combined pre- and post-diagnosis exposures <sup>304</sup>                                                                                                                                                                                                                                                                                                                                                                                                                                                                                                                                                                                                                                              |
| <b>Post-diagnosis WC and breast cancer recurrence</b>                  |                                                                                                                                                                                                                                                                                   |                                                                                                                                                                                                                                                                                                                                                                                                                                                                                                                                                                                                                                                                                                                                |
| 7 publications                                                         | 6 publications were reviewed <sup>72, 112, 143, 151, 207, 255</sup> .                                                                                                                                                                                                             | -1 publication conducted log-rank test only <sup>311</sup>                                                                                                                                                                                                                                                                                                                                                                                                                                                                                                                                                                                                                                                                     |

| Publications identified                                                                                                       | Publications descriptively reviewed or included in the meta-analyses                                                                                                                                                                                                                                                                                                                                                                                                                                                                                                                                                                                                                                                                                                                                                                                                                                                                                                                | Publications excluded from the systematic reviews and meta-analyses and reasons of exclusion                                                                                                                                                                                                                                                                                                                                                                                                                                                                                                                                                                                      |
|-------------------------------------------------------------------------------------------------------------------------------|-------------------------------------------------------------------------------------------------------------------------------------------------------------------------------------------------------------------------------------------------------------------------------------------------------------------------------------------------------------------------------------------------------------------------------------------------------------------------------------------------------------------------------------------------------------------------------------------------------------------------------------------------------------------------------------------------------------------------------------------------------------------------------------------------------------------------------------------------------------------------------------------------------------------------------------------------------------------------------------|-----------------------------------------------------------------------------------------------------------------------------------------------------------------------------------------------------------------------------------------------------------------------------------------------------------------------------------------------------------------------------------------------------------------------------------------------------------------------------------------------------------------------------------------------------------------------------------------------------------------------------------------------------------------------------------|
|                                                                                                                               | Dose-response meta-analysis was not conducted as only two studies have sufficient data to allow the analysis <sup>72, 112</sup> .                                                                                                                                                                                                                                                                                                                                                                                                                                                                                                                                                                                                                                                                                                                                                                                                                                                   |                                                                                                                                                                                                                                                                                                                                                                                                                                                                                                                                                                                                                                                                                   |
| <b>Post-diagnosis waist-to-hip ratio (WHR) and all-cause mortality</b>                                                        |                                                                                                                                                                                                                                                                                                                                                                                                                                                                                                                                                                                                                                                                                                                                                                                                                                                                                                                                                                                     |                                                                                                                                                                                                                                                                                                                                                                                                                                                                                                                                                                                                                                                                                   |
| 14 publications                                                                                                               | 9 publications were reviewed:<br>8 publications were included in the dose-response meta-analyses <sup>39, 55, 60, 71, 107, 109, 112, 118</sup> .<br>1 publication did not have enough data to be included in the dose-response meta-analyses <sup>240</sup>                                                                                                                                                                                                                                                                                                                                                                                                                                                                                                                                                                                                                                                                                                                         | 5 publications:<br>-2 publications <sup>42, 214</sup> were from the same study that was already included in the meta-analysis <sup>55</sup><br>-2 publications < 100 study participants <sup>263, 264</sup><br>-1 publication examined combined pre- and post-diagnosis exposures <sup>304</sup>                                                                                                                                                                                                                                                                                                                                                                                  |
| <b>Post-diagnosis WHR and breast cancer-specific mortality</b>                                                                |                                                                                                                                                                                                                                                                                                                                                                                                                                                                                                                                                                                                                                                                                                                                                                                                                                                                                                                                                                                     |                                                                                                                                                                                                                                                                                                                                                                                                                                                                                                                                                                                                                                                                                   |
| 7 publications                                                                                                                | 6 publications were included in the dose-response meta-analyses <sup>49, 60, 71, 107, 109, 118</sup> .                                                                                                                                                                                                                                                                                                                                                                                                                                                                                                                                                                                                                                                                                                                                                                                                                                                                              | 1 publication examined combined pre- and post-diagnosis exposures <sup>304</sup>                                                                                                                                                                                                                                                                                                                                                                                                                                                                                                                                                                                                  |
| <b>Post-diagnosis WHR and breast cancer recurrence</b>                                                                        |                                                                                                                                                                                                                                                                                                                                                                                                                                                                                                                                                                                                                                                                                                                                                                                                                                                                                                                                                                                     |                                                                                                                                                                                                                                                                                                                                                                                                                                                                                                                                                                                                                                                                                   |
| 9 publications                                                                                                                | 5 publications:<br>- 4 publications (2 studies) on waist-hip-ratio <sup>42, 55, 112, 214</sup> and 1 publication on change in waist-hip-ratio <sup>240</sup> were reviewed.                                                                                                                                                                                                                                                                                                                                                                                                                                                                                                                                                                                                                                                                                                                                                                                                         | 4 publications<br>- 1 publication conducted log-rank test only <sup>311</sup><br>-2 publications < 100 study participants <sup>263, 264</sup><br>-1 publication examined interaction effect <sup>397</sup>                                                                                                                                                                                                                                                                                                                                                                                                                                                                        |
| <b>Post-diagnosis weight change and all-cause mortality</b>                                                                   |                                                                                                                                                                                                                                                                                                                                                                                                                                                                                                                                                                                                                                                                                                                                                                                                                                                                                                                                                                                     |                                                                                                                                                                                                                                                                                                                                                                                                                                                                                                                                                                                                                                                                                   |
| 24 publications<br>27, 39, 42, 50-52, 55, 100, 107, 120, 147, 149, 181, 191, 204, 218, 240, 256, 273, 395, 406, 407, 409, 411 | 11 publications were reviewed*:<br>Overall, 16 publications were reviewed:<br><i>8 pre- to post-diagnosis weight change:</i><br>- 3 publications were meta-analysed <sup>50, 52, 107</sup><br>- 2 publications, one investigated weight change from aged 20 years to study baseline <sup>39</sup> and one assessed absolute pre- to post-diagnosis weight change instead of percentage weight change <sup>100</sup> were reviewed<br>- 1 publication examined late outcomes was reviewed <sup>27</sup> .<br>-2 publications included women with specific breast cancer subtypes were reviewed <sup>42, 51</sup><br><i>5 any period post-diagnosis weight change publications:</i><br>-1 RCT <sup>256</sup><br>- 4 publications (from observational studies) <sup>120, 149, 218, 240</sup><br><i>4 publications on weight change/variation during or from before to after cancer treatment</i> <sup>39, 147, 191, 204</sup><br>*One study reported on two time periods <sup>39</sup> | Overall, 8 publications were excluded*:<br><i>3 pre- to post-diagnosis weight change</i><br>- 2 publications superseded by other publications of the same or overlapping studies <sup>55, 273</sup><br>- 1 publication did not report a RR estimate or 95% confidence interval <sup>411</sup><br><i>2 any period post-diagnosis weight change</i> publications did not report a RR estimate or 95% confidence interval <sup>406, 409</sup><br><i>4 weight change during or from before to after cancer treatment</i> publications did not report a RR estimate or 95% confidence interval <sup>181, 395, 407, 409</sup><br>*One study reported on two time periods <sup>409</sup> |
| <b>Post-diagnosis weight change and breast cancer-specific mortality</b>                                                      |                                                                                                                                                                                                                                                                                                                                                                                                                                                                                                                                                                                                                                                                                                                                                                                                                                                                                                                                                                                     |                                                                                                                                                                                                                                                                                                                                                                                                                                                                                                                                                                                                                                                                                   |
| 8 publications                                                                                                                | Overall, 6 publications were reviewed:                                                                                                                                                                                                                                                                                                                                                                                                                                                                                                                                                                                                                                                                                                                                                                                                                                                                                                                                              | Overall, 2 publications were excluded:                                                                                                                                                                                                                                                                                                                                                                                                                                                                                                                                                                                                                                            |

| Publications identified                                                                                                    | Publications descriptively reviewed or included in the meta-analyses                                                                                                                                                                                                                                                                                                                                                                                                                                            | Publications excluded from the systematic reviews and meta-analyses and reasons of exclusion                                                                                                                                                                                                                                                                                                                                                                                                                                                                                                                                                                                                                                                                                                               |
|----------------------------------------------------------------------------------------------------------------------------|-----------------------------------------------------------------------------------------------------------------------------------------------------------------------------------------------------------------------------------------------------------------------------------------------------------------------------------------------------------------------------------------------------------------------------------------------------------------------------------------------------------------|------------------------------------------------------------------------------------------------------------------------------------------------------------------------------------------------------------------------------------------------------------------------------------------------------------------------------------------------------------------------------------------------------------------------------------------------------------------------------------------------------------------------------------------------------------------------------------------------------------------------------------------------------------------------------------------------------------------------------------------------------------------------------------------------------------|
| 50, 52, 100, 107, 149, 218, 273, 410                                                                                       | <p><i>4 pre- to post-diagnosis weight change:</i></p> <ul style="list-style-type: none"> <li>- 3 publications were meta-analysed<sup>50, 52, 107</sup></li> <li>- 1 publication assessed absolute pre- to post-diagnosis weight change instead of percentage weight change was reviewed<sup>100</sup></li> </ul> <p>2 publications on any period post-diagnosis weight change were reviewed<sup>149, 218</sup></p> <p><i>0 publication on weight change during or from before to after cancer treatment</i></p> | <p><i>1 pre- to post-diagnosis weight change</i> publication was superseded by another publication of the same study<sup>273</sup>.</p> <p><i>1 any period post-diagnosis weight change</i> publication did not report a RR estimate or 95% confidence interval<sup>410</sup></p> <p><i>0 publication on weight change during or from before to after cancer treatment</i></p>                                                                                                                                                                                                                                                                                                                                                                                                                             |
| <b>Post-diagnosis weight change and breast cancer recurrence</b>                                                           |                                                                                                                                                                                                                                                                                                                                                                                                                                                                                                                 |                                                                                                                                                                                                                                                                                                                                                                                                                                                                                                                                                                                                                                                                                                                                                                                                            |
| 24 publications<br>27, 42, 51, 55, 120, 124, 146, 147, 172, 181, 191, 204, 218, 238, 240, 256, 257, 309, 365, 395, 407-410 | <p>Overall, 14 publications were reviewed:</p> <p><i>5 pre- to post-diagnosis weight change</i> publications<sup>27, 42, 51, 55, 146</sup></p> <p><i>5 any period post-diagnosis weight change:</i></p> <ul style="list-style-type: none"> <li>-1 RCT<sup>256</sup></li> <li>-4 publications (from observational studies)<sup>120, 172, 218, 240</sup></li> </ul> <p><i>4 publications on weight change during or from before to after cancer treatment</i><sup>147, 191, 204, 257</sup></p>                    | <p>Overall, 10 publications were excluded:</p> <p><i>0 pre- to post-diagnosis weight change</i> publication</p> <p><i>3 any period post-diagnosis weight change</i> publications did not report a RR estimate or 95% confidence interval<sup>408-410</sup></p> <p><i>8 weight change during or from before to after cancer treatment:</i></p> <ul style="list-style-type: none"> <li>-1 publication on weight gain during chemotherapy and breast cancer recurrence &lt;100 study participants<sup>309</sup></li> <li>- 1 publication reported unadjusted relative risk (RR) estimates only<sup>365</sup></li> <li>- 6 publications did not report a RR estimate or 95% confidence interval<sup>124, 181, 238, 395, 407, 409</sup></li> </ul> <p>*One study reported on two time periods<sup>409</sup></p> |
| <b>Post-diagnosis weight change and second primary breast cancer</b>                                                       |                                                                                                                                                                                                                                                                                                                                                                                                                                                                                                                 |                                                                                                                                                                                                                                                                                                                                                                                                                                                                                                                                                                                                                                                                                                                                                                                                            |
| 3 publications<br>132, 138, 275                                                                                            | <p>Overall, 2 publications were reviewed:</p> <p>0 pre- to post-diagnosis weight change publication</p> <p>2 any period post-diagnosis weight change publications were reviewed<sup>132, 138</sup></p> <p>0 weight change during or from before to after cancer treatment publication</p>                                                                                                                                                                                                                       | <p>1 post-diagnosis weight change publication was superseded by another publication of the same study<sup>275</sup></p>                                                                                                                                                                                                                                                                                                                                                                                                                                                                                                                                                                                                                                                                                    |
| <b>Post-diagnosis BMI change and all-cause mortality</b>                                                                   |                                                                                                                                                                                                                                                                                                                                                                                                                                                                                                                 |                                                                                                                                                                                                                                                                                                                                                                                                                                                                                                                                                                                                                                                                                                                                                                                                            |
| 8 publications<br>84, 177, 178, 200, 211, 225, 236, 254                                                                    | <p>Overall, 7 publications were reviewed:</p> <p><i>2 pre- to post-diagnosis BMI change</i> publications<sup>178, 225</sup>.</p> <p>1 publication on any period post-diagnosis BMI gain<sup>211</sup>.</p> <p><i>4 publications on BMI change during or from before to after cancer treatment</i><sup>84, 177, 236, 254</sup>.</p>                                                                                                                                                                              | <p>1 publication reported unadjusted relative risk (RR) estimates with BMI change during treatment<sup>200</sup></p>                                                                                                                                                                                                                                                                                                                                                                                                                                                                                                                                                                                                                                                                                       |
| <b>Post-diagnosis BMI change and breast cancer-specific mortality</b>                                                      |                                                                                                                                                                                                                                                                                                                                                                                                                                                                                                                 |                                                                                                                                                                                                                                                                                                                                                                                                                                                                                                                                                                                                                                                                                                                                                                                                            |

| Publications identified                                              | Publications descriptively reviewed or included in the meta-analyses                                                                                                                                                                                                                                                                | Publications excluded from the systematic reviews and meta-analyses and reasons of exclusion                                                                                                              |
|----------------------------------------------------------------------|-------------------------------------------------------------------------------------------------------------------------------------------------------------------------------------------------------------------------------------------------------------------------------------------------------------------------------------|-----------------------------------------------------------------------------------------------------------------------------------------------------------------------------------------------------------|
| 3 publications<br>178, 211, 225                                      | Overall, 3 publications were reviewed:<br><i>2 pre- to post-diagnosis BMI change publications</i> <sup>178, 225</sup><br>1 publication on any period post-diagnosis BMI gain <sup>211</sup><br><i>0 publication on BMI change during or from before to after cancer treatment</i>                                                   | -                                                                                                                                                                                                         |
| <b>Post-diagnosis BMI change and breast cancer recurrence</b>        |                                                                                                                                                                                                                                                                                                                                     |                                                                                                                                                                                                           |
| 9 publications <sup>84, 160, 177, 178, 200, 211, 225, 236, 254</sup> | Overall, 9 publications were reviewed:<br><i>2 pre- to post-diagnosis BMI change publications</i> <sup>178, 225</sup><br>1 publication on any period post-diagnosis BMI gain <sup>211</sup><br><i>6 publications on BMI change/variation during or from before to after cancer treatment</i> <sup>84, 160, 177, 200, 236, 254</sup> |                                                                                                                                                                                                           |
| <b>Post-diagnosis BMI change and second primary cancers</b>          |                                                                                                                                                                                                                                                                                                                                     |                                                                                                                                                                                                           |
| 2 publications<br>132, 312                                           | 1 publication on any period post-diagnosis BMI change was reviewed <sup>132</sup>                                                                                                                                                                                                                                                   | 1 publication on DCIS survivors, investigating pre- to post-diagnosis BMI change and any second breast cancer (secondary breast and second primary breast cancers) as outcome was excluded <sup>312</sup> |



**Supplementary Table S4 Description of studies included in or excluded from the descriptive review or meta-analysis of body mass index**

| Author, year, study name, country, WCRF Code                              | Study description                                                                                                  | Time of diagnosis and follow-up                             | Disease characteristics treatment                                                                                                                                                                                                 | Exposure assessment | Outcome (events)                                                                                                                                                                                                                                                 | Contrast                          | RR (95% CI)                                                                                                                                                                                 | Covariates                             |
|---------------------------------------------------------------------------|--------------------------------------------------------------------------------------------------------------------|-------------------------------------------------------------|-----------------------------------------------------------------------------------------------------------------------------------------------------------------------------------------------------------------------------------|---------------------|------------------------------------------------------------------------------------------------------------------------------------------------------------------------------------------------------------------------------------------------------------------|-----------------------------------|---------------------------------------------------------------------------------------------------------------------------------------------------------------------------------------------|----------------------------------------|
| Almeida NR, 2021 <sup>215</sup> , Brazil<br><br>BMI – Included, review    | Female, Retrospective Cohort of Cancer Survivors (n=866) Menopause 63.7%                                           | Diagnosed:2011-2015 (surgery) follow Up: Median 50.4 months | Luminal 69.2%, her/lumina HER 18%, triple-negative 12.6%. Nononcplastic breast-conserving surgery 88.7%, oncplastic breast-conerving surgery 11.3%. Mammoplasty 89.8%. Neoadjuvant chemotherapy 88.8%                             | Medical records     | Local recurrence                                                                                                                                                                                                                                                 | >=25 vs <25 kg/m <sup>2</sup>     | 0.44(0.20-0.94)<br>P=0.035                                                                                                                                                                  | Age at surgery, surgery, tumor subtype |
| Anwar SL, 2021 <sup>216</sup> , Indonesia<br><br>BMI – Included, review   | Female, Retrospective Cohort of Cancer Survivors (n=1081) mean age:50.9 Premenopausal 28.3%, post-menopausal 71.7% | Diagnosed:2014-2018 (surgery)                               | Nonmetastatic breast cancer patients. Stage I 1.2%, II 32.9%, III 65.9%. Neo-/Adjuvant chemotherapy 91.5%. Adjuvant endocrine therapy with tamoxifen 29.5%. Adjuvant radiotherapy 73.6%. Mastectomy 90.2%, BCT 9.2%, Biopsy 0.6%. | Measured            | Recurrence (n=66)<br>Locoregional progression<br>Premenopausal Recurrence<br>Postmenopausal Recurrence<br>Luminal a Recurrence<br>Luminal b Recurrence<br>HER2-enriched Recurrence<br>Triple-negative Recurrence<br>Luminal Recurrence<br>Non-luminal Recurrence | >27.7 vs <=27.7 kg/m <sup>2</sup> | 1.01(0.74-1.40)<br>0.89 (0.68-1.20)<br>0.63(0.31-1.26)<br>1.23(0.85-1.78)<br>1.15(0.73-1.80)<br>1.41(0.54-3.65)<br>0.73(0.29-1.82)<br>0.80(0.42-1.52)<br>1.19(0.79-1.79)<br>0.77(0.46-1.31) | Multivariable adjusted                 |
| Ballinger TJ, 2021 <sup>353</sup> , BRE12-158 trial<br><br>BMI - Excluded | Female, Secondary analysis of clinical trials (n=172)                                                              | Diagnosed:2014-2018 follow Up: Median 17.2 months           | Triple-negative breast cancer                                                                                                                                                                                                     | Measured            | Overall survival (n=41)                                                                                                                                                                                                                                          | Per 1 kg/m <sup>2</sup>           | 0.77(0.46-1.31)<br>Ptrend=0.343                                                                                                                                                             | Stage, ctDna, nodal status             |

|                                                                                                                                                                     |                                                                                                                             |                                                                  |                                                                                                                                                                                                                                                               |                 |                                                     |                                      |                               |                                                                   |
|---------------------------------------------------------------------------------------------------------------------------------------------------------------------|-----------------------------------------------------------------------------------------------------------------------------|------------------------------------------------------------------|---------------------------------------------------------------------------------------------------------------------------------------------------------------------------------------------------------------------------------------------------------------|-----------------|-----------------------------------------------------|--------------------------------------|-------------------------------|-------------------------------------------------------------------|
|                                                                                                                                                                     |                                                                                                                             |                                                                  |                                                                                                                                                                                                                                                               |                 | Overall survival (n=41)                             | ≥30 vs <30 kg/m <sup>2</sup>         | 0.94; Ptrend=0.86             | Stage, ctDna, nodal status                                        |
|                                                                                                                                                                     |                                                                                                                             |                                                                  |                                                                                                                                                                                                                                                               |                 | Disease free survival (n=61)                        |                                      | 0.98; Ptrend=0.93             |                                                                   |
|                                                                                                                                                                     |                                                                                                                             |                                                                  |                                                                                                                                                                                                                                                               |                 | Distant disease-free survival (n=55)                |                                      | 0.87; Ptrend=0.62             |                                                                   |
| Bandera EV, 2021 <sup>118</sup> , Women's Circle of Health Study and the Women's Circle of Health Follow-Up Study (WCHFS), USA<br><br>BMI – Included, meta-analysis | Female, Population-based cohort Study (n=1891) mean age:54.5<br>Pre-menopausal 39%, post-menopausal 61%<br>African-American | Diagnosed:2005 - February 2020<br>follow Up:<br>Median 5.9 years | Ductal carcinoma in situ or invasive breast cancer. Stage 0 18%, I 36%, II 32%, III 10%, IV 2%. ER positive 70%, negative 27%, missing 3%. No surgery 3%, lumpectomy 51%, mastectomy 46%.<br>Chemotherapy 55%.<br>Radiotherapy 68%.<br>Endocrine therapy 64%. | Measured        | All-cause mortality (n=286)                         | ≥35.0 vs 18.5-24.9 kg/m <sup>2</sup> | 1.26(0.89-1.79) P trend=0.12  | Age, income, smoking, tumor stage, tumor subtype, type of surgery |
|                                                                                                                                                                     |                                                                                                                             |                                                                  |                                                                                                                                                                                                                                                               |                 | Premenopausal All-cause mortality (n=105)           |                                      | 1.33(0.75-2.37) P trend=0.11  |                                                                   |
|                                                                                                                                                                     |                                                                                                                             |                                                                  |                                                                                                                                                                                                                                                               |                 | Postmenopausal All-cause mortality (n=181)          |                                      | 1.26(0.80-1.99) P trend=0.11  |                                                                   |
|                                                                                                                                                                     |                                                                                                                             |                                                                  |                                                                                                                                                                                                                                                               |                 | ER positive All-cause mortality (n=176)             |                                      | 1.20(0.76-1.90) P trend=0.12  |                                                                   |
|                                                                                                                                                                     |                                                                                                                             |                                                                  |                                                                                                                                                                                                                                                               |                 | ER negative All-cause mortality (n=106)             |                                      | 1.34(0.75-2.42) P trend=0.11  |                                                                   |
|                                                                                                                                                                     |                                                                                                                             |                                                                  |                                                                                                                                                                                                                                                               |                 | Breast cancer-specific mortality (n=175)            |                                      | 1.33(0.84-2.10) P trend=0.12  |                                                                   |
|                                                                                                                                                                     |                                                                                                                             |                                                                  |                                                                                                                                                                                                                                                               |                 | ER positive Breast cancer-specific mortality (n=96) |                                      | 1.12(0.60-2.08) P trend=0.12  |                                                                   |
|                                                                                                                                                                     |                                                                                                                             |                                                                  |                                                                                                                                                                                                                                                               |                 | ER negative Breast cancer-specific mortality (n=76) |                                      | 1.51(0.73-3.09) P trend=0.11  |                                                                   |
| Behrouzi B, 2021 <sup>354</sup> , Iran<br><br>BMI - Excluded                                                                                                        | Female, Retrospective Cohort of Cancer Survivors (n=217)<br>Mean age:53.32.                                                 | Diagnosed:2003-2014(treatment)<br>follow Up:<br>Median 60 months | Breast cancer. TNM stage (n): I 35, IIA 55, IIB 46, IIIA 44, IIIB 14, IIIC 17. ER (n): Negative 65, Positive 151. PR (n): Negative 79, Positive 137. HER2 (n): Negative                                                                                       | Medical records | Overall survival (n=37)                             | Per 1 kg/m <sup>2</sup>              | 1.08(1.03-1.14) P trend=0.002 | Age, anti-diabetic medication use, TNM stage                      |

|                                                                                                                  |                                                                                                                    |                                                                                                                                |                                                                                                                                                                                                                                                   |                                                                                              |                                                                                                                    |                                      |                                                  |                                                                                                                                                                                                          |
|------------------------------------------------------------------------------------------------------------------|--------------------------------------------------------------------------------------------------------------------|--------------------------------------------------------------------------------------------------------------------------------|---------------------------------------------------------------------------------------------------------------------------------------------------------------------------------------------------------------------------------------------------|----------------------------------------------------------------------------------------------|--------------------------------------------------------------------------------------------------------------------|--------------------------------------|--------------------------------------------------|----------------------------------------------------------------------------------------------------------------------------------------------------------------------------------------------------------|
|                                                                                                                  |                                                                                                                    |                                                                                                                                | 170, Positive 45. Subtype (n): Luminal-A 131, Luminal-B 19, Triple-Negative 39, HER2type 26. (n): 148 Metformin, 69 Other antidiabetic drugs. All received chemotherapy and/or hormonal therapy. Chemotherapy (n): 196 Adjuvant, 21 Neo-adjuvant. |                                                                                              | 5-year recurrence-free survival (n=63)                                                                             |                                      | 1.05(1.01-1.10) P trend=0.02                     |                                                                                                                                                                                                          |
| Cárdenas-Cárdenas E, 2021 <sup>217</sup> , Mexico<br><br>BMI – Included, review                                  | Female, Retrospective Cohort of Cancer Survivors (n=220) age range: 49-70 years                                    | Diagnosed:2013-2017 follow Up: Median 30.7 months                                                                              | Breast cancer. Stages I-III                                                                                                                                                                                                                       | Measured                                                                                     | Recurrence free survival (n=8)                                                                                     | ≥30.0 vs 18.5-24.9 kg/m <sup>2</sup> | 2.10(0.74-6.13) P=0.160                          | Age, histological grade, hormone receptor status, number of lymph nodes, treatment, tumor size                                                                                                           |
| Feigelson, 2021 <sup>412</sup> , Kaiser Permanente Breast Cancer Survivors Cohort (KPBCSC)<br><br>BMI – Excluded | Retrospective Cohort of Cancer Survivors (n=6,481) Mean age 61.2 years White 82.2%, Black 3.4% Other/unknown 14.3% | Diagnosed: 2000-2014 (Colorado); 1990-2008 (Washington) Follow-up 88 months Study entry from 1 year post-diagnosis (47,691 PY) | Invasive primary breast cancer Stage I 62%, II 32.6%, III 5.4% ER+ 80%, ER- 16.85, PR+ 69.3% PR- 26.4% Radiation 70.8%, chemotherapy 38.2% Hormonal therapy 68.4%                                                                                 | Registry and medical records BMI within 2 years prior through 1 year after initial diagnosis | Second primary breast cancer (n=333)                                                                               | Per 5 kg/m <sup>2</sup>              | 1.11 (1.02-1.21)                                 | Study site, race and ethnicity, age, comorbidity index, receipt of radiation, receipt of chemotherapy, receipt of hormonal therapy, ER and PR status, stage, and year of initial breast cancer diagnosis |
| Franzoi MA, 2021 <sup>238</sup> , MONARCH 2 AND MONARCH 3 trials, Multi-country<br><br>BMI – Included, review    | Female, Secondary analysis of clinical trials (n=1138)                                                             |                                                                                                                                | Advanced ER-positive, HER2-negative breast cancer 757 patients received abemaciclib + endocrine therapy and 381 only endocrine therapy                                                                                                            | Measured                                                                                     | Abemaciclib + endocrine therapy Progression-free survival<br>Placebo + endocrine therapy Progression-free survival | >=25 vs <25 kg/m <sup>2</sup>        | 1.00(0.81-1.25) P=0.98<br>0.80(0.62-1.04) P=0.09 | Age, ECOG performance, endocrine therapy, menopausal status, number of metastatic sites, other factors                                                                                                   |

|                                                                                                                     |                                                                                                      |                                                             |                                                                                                                                                                                                                                                                                         |                 |                           |                                      |                                                                                                                      |            |
|---------------------------------------------------------------------------------------------------------------------|------------------------------------------------------------------------------------------------------|-------------------------------------------------------------|-----------------------------------------------------------------------------------------------------------------------------------------------------------------------------------------------------------------------------------------------------------------------------------------|-----------------|---------------------------|--------------------------------------|----------------------------------------------------------------------------------------------------------------------|------------|
| Iwase T, 2021 <sup>355</sup> , USA<br>BMI - Excluded                                                                | Female, Retrospective Cohort of Cancer Survivors (n=198) mean age:49 Pre-menopausal 57% Multi-ethnic | Diagnosed:2007-2015 (treatment) follow Up: Median 4.7 years | Breast cancer stage III; ER+/HER2- 58%, ER+/HER2+ 17%, ER-/HER2+ 8%, triple-negative 17%; T3/T4 68%, N3 48% Neoadjuvant chemotherapy                                                                                                                                                    | Measured        | Overall survival          | ≥30.0 vs 18.5-24.9 kg/m <sup>2</sup> | 1.19(0.55-2.59) P=0.66                                                                                               | Unadjusted |
| Jeon YW, 2021 <sup>356</sup> , Korea<br>BMI - Excluded                                                              | Female, Retrospective Cohort of Cancer Survivors (n=479) mean age:51                                 | Diagnosed:2005-2015 (treatment) follow Up: Median 79 months | Breast cancer stage I 30.5%, II 49.5%, III 20.0%; luminal cancer 49.5%, HER2-expressive 31.1%, triple-negative 19.4% Surgery and adjuvant chemotherapy 100%; breast conservation 71%, mastectomy 28%; adriamycin-based chemotherapy 86.4%                                               | Measured        | Overall survival          | Obese vs Underweight                 | 0.99(0.34-2.93) P trend=0.877                                                                                        | Unadjusted |
|                                                                                                                     |                                                                                                      |                                                             |                                                                                                                                                                                                                                                                                         |                 | Breast cancer survival    |                                      | 1.21(0.27-5.46) P trend=0.96                                                                                         |            |
| Jung AY, 2021 <sup>218</sup> , Mammary Carcinoma Risk Factor Investigation (MARIE) study, Germany<br>BMI - Excluded | Female, Population-based Cohort Study (n=2216) mean age:62.9                                         | Diagnosed:2002-2005                                         | Invasive breast cancer. Grade low/moderate 69.1%, high 21.7%. HER2 positive 16.5%, negative 69.9%. Mastectomy 2.6%, mastectomy + axilla 23.5%, breast conserving 8.6%, breast conserving + axilla 65.3%. Chemotherapy 45.6%. Radiotherapy 80%. Tamoxifen/aromatase inhibitor use 80.9%. | Self-reported   | All-cause mortality       |                                      | "There was no evidence for associations between follow-up weight and subsequent prognosis according to baseline BMI" |            |
|                                                                                                                     |                                                                                                      |                                                             |                                                                                                                                                                                                                                                                                         |                 | Cancer specific mortality |                                      |                                                                                                                      |            |
|                                                                                                                     |                                                                                                      |                                                             |                                                                                                                                                                                                                                                                                         |                 | Recurrence-free survival  |                                      |                                                                                                                      |            |
| Kennard K, 2021 <sup>357</sup> , USA<br>BMI - Excluded                                                              | Female, Retrospective Cohort of Cancer Survivors (n=177) mean age:59.9                               | Diagnosed:2007-2013 follow Up: Minimum 5 years              | Triple negative breast cancer. Pathological stage 1 46.9%, 2 45.8%, 3 7.3%. Neoadjuvant therapy 7.3%.                                                                                                                                                                                   | Medical records | Overall survival (n=33)   | >=30 vs <25 kg/m <sup>2</sup>        | 0.45(0.18-1.12) P=0.088                                                                                              | Unadjusted |

|                                                                                                              |                                                                         |                                                                 |                                                                                                                                                                                                                                                                                                                                                                        |                 |                               |                         |                            |                                                                                                                                                              |
|--------------------------------------------------------------------------------------------------------------|-------------------------------------------------------------------------|-----------------------------------------------------------------|------------------------------------------------------------------------------------------------------------------------------------------------------------------------------------------------------------------------------------------------------------------------------------------------------------------------------------------------------------------------|-----------------|-------------------------------|-------------------------|----------------------------|--------------------------------------------------------------------------------------------------------------------------------------------------------------|
|                                                                                                              | Multi-ethnic                                                            |                                                                 | Neoadjuvant and adjuvant chemotherapy 7.3%, neoadjuvant chemotherapy only 0%, adjuvant chemotherapy only 67.2%, unknown 4%.                                                                                                                                                                                                                                            |                 | Disease free survival (n=33)  |                         | 0.46(0.20-1.07)<br>P=0.071 |                                                                                                                                                              |
| Kim SW, 2021 <sup>358</sup> , Korea<br><br>BMI - Excluded                                                    | Female, Secondary analysis of clinical trials (n=907)                   | Diagnosed:2007-2012 (surgery)<br>follow Up:<br>Median 72 months | Pathologically stage T1-2 and N0-1 Breast-conserving surgery 721 participants, total mastectomy 186 participants. 878 participants received systemic treatment, 196 participants adjuvant chemotherapy alone , 234 participants adjuvant hormone therapy alone and 448 participants both treatments. Radiotherapy 701 participants.                                    | Medical records | Local recurrence (n=29)       | >=30 vs <25 kg/m^2      | Log-rank test P=0.756      |                                                                                                                                                              |
| Ko SM, 2021 <sup>119</sup> , Korea<br><br>BMI – Excluded (mortality)<br>Included, meta-analysis (recurrence) | Female, Retrospective Cohort of Cancer Survivors (n=1225) mean age:51.4 | Diagnosed:2009-2015 follow Up:<br>Median 70 months              | Histologic grade low 20.7%, intermediate 50.4%, high 28.5%. ER negative 29%, positive 71%. PR negative 38.6%, positive 61.3%. HER2 negative 71.2%, positive 25% Total mastectomy 45.4%, breast conserving surgery 54.6%. Anxillary surgery SLNB 82.2%, ALND 17.8%. Endocrine therapy 68.7%, not performed 30.9%, unknown 0.4%. Chemotherapy 60.2%. Radiotherapy 59.3%. | Measured        | Overall survival (n=14)       | ≥23 vs 18.5-22.9 kg/m^2 | 0.55(0.18-1.68)            | Unadjusted                                                                                                                                                   |
|                                                                                                              |                                                                         |                                                                 |                                                                                                                                                                                                                                                                                                                                                                        |                 | Disease free survival (n=138) |                         | 1.98(1.34-2.92)            | Age, WBC count, Histological grade, Estrogen receptor status, Progesterone receptor status, HER2 status , Ki-67, Tumor size, Positive lymph node involvement |

|                                                                                                                      |                                                                                                                                              |                                |                                                                                                                                                                                                                                                                                                                                                                                                                           |                 |                                      |                                        |                                                                                                                                                                                             |                                                                   |
|----------------------------------------------------------------------------------------------------------------------|----------------------------------------------------------------------------------------------------------------------------------------------|--------------------------------|---------------------------------------------------------------------------------------------------------------------------------------------------------------------------------------------------------------------------------------------------------------------------------------------------------------------------------------------------------------------------------------------------------------------------|-----------------|--------------------------------------|----------------------------------------|---------------------------------------------------------------------------------------------------------------------------------------------------------------------------------------------|-------------------------------------------------------------------|
|                                                                                                                      |                                                                                                                                              |                                | Anti-HER2 therapy<br>19.2%.                                                                                                                                                                                                                                                                                                                                                                                               |                 |                                      |                                        |                                                                                                                                                                                             |                                                                   |
| Kreklau A, 2021 <sup>359</sup> , Germany<br><br>BMI - Excluded                                                       | Female, Retrospective Cohort of Cancer Survivors (n=635) mean age:60.8, Premenopausal (n=92), perimenopausal (n=73), postmenopausal (n=470). | Diagnosed:2004=2010            | Non-metastatic breast cancer. Grade (n): 112 G1, 341 G2, 180 G3. Estrogen receptor (n): 520 Positive, 113 Negative. Progesterone receptor (n): 463 Positive, 170 Negative. HER2 status (n): 99 Positive, 532 Negative. Triple negative (n): 75. (n): 92 hormone replacement therapy. Adjuvant Chemotherapy (n): 324 Yes, 204 No. Adjuvant radiation (n): 455 Yes, 83 No. Adjuvant endocrine therapy (n): 511 Yes, 117 No. | Measured        | Overall survival                     |                                        | OS was increased in patients with intermediate BMI (25-30 kg/m <sup>2</sup> ) as compared to patients with low (<25 kg/m <sup>2</sup> ) and high BMI (>30 kg/m <sup>2</sup> ), respectively |                                                                   |
|                                                                                                                      |                                                                                                                                              |                                |                                                                                                                                                                                                                                                                                                                                                                                                                           |                 | Progression-free survival            | <30 vs >30 kg/m <sup>2</sup>           | 1.90(0.97-3.69) P=0.06                                                                                                                                                                      |                                                                   |
| Ligorio F, 2021 <sup>219</sup> , Fondazione IRCCS Istituto Nazionale dei Tumori, Italy<br><br>BMI – Included, review | Female, Retrospective Cohort of Cancer Survivors (n=505) mean age:55.38                                                                      | Follow Up: Average 76.7 months | Surgically resected, stage I–III HER2+ BC treated with standard-of-care, trastuzumab-containing 34.7 % HR neg 65.3% HR posit 71.7% anthracycline–taxane                                                                                                                                                                                                                                                                   | Medical records | Overall survival (n=35)              | BMI ≥27.77 vs <27.77 kg/m <sup>2</sup> | 2.25(1.03-4.94) P=0.043                                                                                                                                                                     | Lymph node involvement, peritumoral vascular invasion             |
|                                                                                                                      |                                                                                                                                              |                                |                                                                                                                                                                                                                                                                                                                                                                                                                           |                 | Recurrence free survival (n=55)      |                                        | 2.26(1.08-4.74) P=0.031                                                                                                                                                                     | Grade, hormonal receptor status, lymph node involvement, glycemia |
|                                                                                                                      |                                                                                                                                              |                                |                                                                                                                                                                                                                                                                                                                                                                                                                           |                 | Distant disease-free survival (n=48) |                                        | Survival rate: 85.7% (79.2–92.7%) vs 90.9% (87.8-94.1%) P=0.056                                                                                                                             | Unadjusted                                                        |
|                                                                                                                      |                                                                                                                                              |                                |                                                                                                                                                                                                                                                                                                                                                                                                                           |                 | Recurrence free survival             |                                        | 1.36 (0.61-3.07) P=0.452                                                                                                                                                                    | Unadjusted                                                        |

|                                                                    |                                                                         |                                                 |                                                                                       |                                   |                                                     |                                               |                            |                                                                                              |
|--------------------------------------------------------------------|-------------------------------------------------------------------------|-------------------------------------------------|---------------------------------------------------------------------------------------|-----------------------------------|-----------------------------------------------------|-----------------------------------------------|----------------------------|----------------------------------------------------------------------------------------------|
|                                                                    |                                                                         |                                                 |                                                                                       |                                   | Hormone receptor+                                   |                                               |                            |                                                                                              |
|                                                                    |                                                                         |                                                 |                                                                                       |                                   | Recurrence free survival<br>Hormone receptor-       |                                               | 2.29(1.01-5.20)<br>P=0.047 | Lymph node involvement                                                                       |
| Lin YC, 2021 <sup>220</sup> , Taiwan                               | Female, Retrospective Cohort of Cancer Survivors (n=5000)               | Diagnosed:1990-2005 follow Up: Maximum 10 years | Stage i-III                                                                           | Medical records                   | All-cause mortality                                 | ≥27 vs <24 kg/m <sup>2</sup>                  | 1.17(1.04-1.33)<br>P=0.010 | ER status, HER2 status , nodal status, nuclear grade, tumour size                            |
| BMI – Included, review                                             |                                                                         |                                                 |                                                                                       | Disease free survival             | 1.05(0.93-1.18)<br>P=0.454                          |                                               |                            |                                                                                              |
|                                                                    |                                                                         |                                                 |                                                                                       | Age < 50y All-cause mortality     | 1.21(1.00-1.45)<br>P=0.045                          |                                               |                            |                                                                                              |
|                                                                    |                                                                         |                                                 |                                                                                       | Age < 50y Disease free survival   | 1.24(1.05-1.46)<br>P=0.011                          |                                               |                            |                                                                                              |
| Liu YS, 2021 <sup>360</sup>                                        | Female, Retrospective Cohort of Cancer Survivors (n=6642) mean age:48.3 | Follow Up: Maximum 10 years                     | Stage I 40.72%, II 38.56%, III 10.86%, IV 1.16%. ER positive 61.66%, negative 32.11%. | Medical records                   | ER positive Disease free survival                   | Overweight/obese vs Underweight/normal weight | 1.42(1.05-1.92)            | Multivariable adjusted                                                                       |
| BMI - Excluded                                                     |                                                                         |                                                 |                                                                                       | ER negative Disease free survival | 0.96(0.70-1.31)                                     |                                               |                            |                                                                                              |
| Martel S, 2021 <sup>120</sup> , ALTO BIG 2-06 trial, Multi-country | Female, Secondary analysis of clinical trials (n=8381) Mostly White     | Follow Up: Median 4.5 years                     | HER2-positive early breast cancer                                                     | Measured                          | Overall survival (n=528)                            | ≥30 vs 18.5-24.9 kg/m <sup>2</sup>            | 1.27(1.01-1.60)            | Ethnicity, age, menopausal status, nodal status, size, local, grade, surgery, treatment type |
| BMI – Included, meta-analysis                                      |                                                                         |                                                 |                                                                                       |                                   | Disease free survival (n=854)                       |                                               | 1.14(0.97-1.32)            |                                                                                              |
|                                                                    |                                                                         |                                                 |                                                                                       |                                   | Distant disease-free survival (n=839)               |                                               | 1.25(1.04-1.50)            |                                                                                              |
|                                                                    |                                                                         |                                                 |                                                                                       |                                   | Premenopausal Overall survival (n=209)              |                                               | 0.96(0.65-1.43)            |                                                                                              |
|                                                                    |                                                                         |                                                 |                                                                                       |                                   | Postmenopausal Overall survival (n=319)             |                                               | 1.41(1.06-1.88)            |                                                                                              |
|                                                                    |                                                                         |                                                 |                                                                                       |                                   | Premenopausal Disease free survival (n=538)         |                                               | 0.95(0.74-1.22)            |                                                                                              |
|                                                                    |                                                                         |                                                 |                                                                                       |                                   | Postmenopausal Disease free survival (n=667)        |                                               | 1.26(1.03-1.53)            |                                                                                              |
|                                                                    |                                                                         |                                                 |                                                                                       |                                   | Premenopausal Distant disease-free survival (n=394) |                                               | 1.09(0.82-1.45)            |                                                                                              |

|  |  |  |  |  |                                                                         |                 |  |
|--|--|--|--|--|-------------------------------------------------------------------------|-----------------|--|
|  |  |  |  |  | Postmenopausal Distant disease-free survival (n=445)                    | 1.35(1.06-1.71) |  |
|  |  |  |  |  | Hormone receptor +ve Overall survival (n=227)                           | 1.23(0.87-1.74) |  |
|  |  |  |  |  | Hormone receptor -ve Overall survival (n=301)                           | 1.26(0.92-1.71) |  |
|  |  |  |  |  | Hormone receptor +ve Disease free survival (n=596)                      | 1.05(0.84-1.30) |  |
|  |  |  |  |  | Hormone receptor -ve Disease free survival (n=609)                      | 1.22(0.98-1.51) |  |
|  |  |  |  |  | Hormone receptor +ve Distant disease-free survival (n=397)              | 1.15(0.88-1.49) |  |
|  |  |  |  |  | Hormone receptor -ve Distant disease-free survival (n=442)              | 1.34(1.05-1.73) |  |
|  |  |  |  |  | Treated with trastuzumab alone Overall survival (n=135)                 | 1.14(0.72-1.80) |  |
|  |  |  |  |  | Treated with lapatinib alone Overall survival (n=168)                   | 1.00(0.65-1.55) |  |
|  |  |  |  |  | Treated with trastuzumab followed by lapatinib Overall survival (n=119) | 1.54(0.94-2.52) |  |



|  |  |  |  |  |                                                                                      |                 |  |
|--|--|--|--|--|--------------------------------------------------------------------------------------|-----------------|--|
|  |  |  |  |  | Treated with trastuzumab + lapatinib Overall survival (n=106)                        | 1.59(0.98-2.57) |  |
|  |  |  |  |  | Treated with trastuzumab alone Disease free survival (n=301)                         | 1.21(0.89-1.63) |  |
|  |  |  |  |  | Treated with lapatinib alone Disease free survival (n=366)                           | 1.02(0.76-1.35) |  |
|  |  |  |  |  | Treated with trastuzumab followed by lapatinib Disease free survival (n=284)         | 1.06(0.77-1.46) |  |
|  |  |  |  |  | Treated with trastuzumab + lapatinib Disease free survival (n=254)                   | 1.30(0.93-1.81) |  |
|  |  |  |  |  | Treated with trastuzumab alone Distant disease-free survival (n=204)                 | 1.29(0.89-1.86) |  |
|  |  |  |  |  | Treated with lapatinib alone Distant disease-free survival (n=277)                   | 1.03(0.74-1.43) |  |
|  |  |  |  |  | Treated with trastuzumab followed by lapatinib Distant disease-free survival (n=196) | 1.43(0.98-2.08) |  |
|  |  |  |  |  | Treated with trastuzumab + lapatinib Distant disease-free survival (n=162)           | 1.43(0.95-2.13) |  |

|                                                                                                                                                 |                                                                 |                                    |                                                   |          |                                                                                  |                                       |                 |                                                                                                                                                  |
|-------------------------------------------------------------------------------------------------------------------------------------------------|-----------------------------------------------------------------|------------------------------------|---------------------------------------------------|----------|----------------------------------------------------------------------------------|---------------------------------------|-----------------|--------------------------------------------------------------------------------------------------------------------------------------------------|
| Modi ND, 2021 <sup>221</sup> ,<br>HERA,<br>CLEOPATRA,<br>MARIANNE,<br>EMILIA and<br>TH3RESA, Multi-<br>country<br><br>BMI – Included,<br>review | Female,<br>Secondary<br>analysis of clinical<br>trials (n=8595) | Follow Up:<br>Median 132<br>months | HER2 positive early and<br>advanced breast cancer | Measured | Early Breast<br>Cancer Overall<br>survival                                       | ≥30 vs 18.5-24.9<br>kg/m <sup>2</sup> | 1.37(1.14-1.64) | Age, cardiovascular<br>disease, diabetes, ECOG<br>performance, ER/PR<br>status, histological<br>grade, race                                      |
|                                                                                                                                                 |                                                                 |                                    |                                                   |          | Early Breast<br>Cancer Disease<br>free survival                                  |                                       | 1.20(1.04-1.39) |                                                                                                                                                  |
|                                                                                                                                                 |                                                                 |                                    |                                                   |          | Advanced Breast<br>Cancer Overall<br>survival                                    |                                       | 0.82(0.72-0.95) | Age, albumin,<br>cardiovascular disease,<br>diabetes, ECOG<br>performance, ER/PR<br>status, histological<br>grade, race, visceral<br>involvement |
|                                                                                                                                                 |                                                                 |                                    |                                                   |          | Advanced Breast<br>Cancer<br>Progression-free<br>survival                        |                                       | 0.87(0.77-0.98) |                                                                                                                                                  |
|                                                                                                                                                 |                                                                 |                                    |                                                   |          | Early breast<br>cancer -<br>trastuzumab 1-<br>year arm Overall<br>survival       |                                       | 1.55(1.12-2.15) | Age, cardiovascular<br>disease, diabetes, ECOG<br>performance, ER/PR<br>status, histological<br>grade, race                                      |
|                                                                                                                                                 |                                                                 |                                    |                                                   |          | Early breast<br>cancer -<br>trastuzumab 2-<br>years arm Overall<br>survival      |                                       | 1.13(0.81-1.57) |                                                                                                                                                  |
|                                                                                                                                                 |                                                                 |                                    |                                                   |          | Early breast<br>cancer - placebo<br>arm Overall<br>survival                      |                                       | 1.46(1.08-1.95) |                                                                                                                                                  |
|                                                                                                                                                 |                                                                 |                                    |                                                   |          | Early breast<br>cancer -<br>trastuzumab 1-<br>year arm Disease<br>free survival  |                                       | 1.33(1.03-1.73) |                                                                                                                                                  |
|                                                                                                                                                 |                                                                 |                                    |                                                   |          | Early breast<br>cancer -<br>trastuzumab 2-<br>years arm Disease<br>free survival |                                       | 1.03(0.79-1.33) |                                                                                                                                                  |
|                                                                                                                                                 |                                                                 |                                    |                                                   |          | Early breast<br>cancer - placebo<br>arm Disease free<br>survival                 |                                       | 1.28(1.01-1.63) |                                                                                                                                                  |

|  |  |  |  |  |                                                                |                 |                                                                                                                                |
|--|--|--|--|--|----------------------------------------------------------------|-----------------|--------------------------------------------------------------------------------------------------------------------------------|
|  |  |  |  |  | CLEOPATRA<br>Overall survival                                  | 0.86(0.63-1.17) | Age, albumin, cardiovascular disease, diabetes, ECOG performance, ER/PR status, histological grade, race, visceral involvement |
|  |  |  |  |  | MARIANNE<br>Overall survival                                   | 0.63(0.43-0.87) |                                                                                                                                |
|  |  |  |  |  | TH3RESA Overall survival                                       | 0.70(0.50-0.98) |                                                                                                                                |
|  |  |  |  |  | EMILIA Overall survival                                        | 1.01(0.82-1.26) |                                                                                                                                |
|  |  |  |  |  | CLEOPATRA<br>Progression-free survival                         | 0.92(0.72-1.17) |                                                                                                                                |
|  |  |  |  |  | MARIANNE<br>Progression-free survival                          | 0.74(0.59-0.92) |                                                                                                                                |
|  |  |  |  |  | TH3RESA<br>Progression-free survival                           | 0.69(0.52-0.94) |                                                                                                                                |
|  |  |  |  |  | EMILIA<br>Progression-free survival                            | 1.07(0.87-1.31) |                                                                                                                                |
|  |  |  |  |  | Early breast cancer - ER or PR positive Overall survival       | 1.55(1.18-2.02) | Age, albumin, cardiovascular disease, diabetes, ECOG performance, ER/PR status, histological grade                             |
|  |  |  |  |  | Early breast cancer - ER and PR negative Overall survival      | 1.25(0.98-1.59) |                                                                                                                                |
|  |  |  |  |  | Early breast cancer - ER or PR positive Disease free survival  | 1.28(1.04-1.58) |                                                                                                                                |
|  |  |  |  |  | Early breast cancer - ER and PR negative Disease free survival | 1.14(0.94-1.39) |                                                                                                                                |
|  |  |  |  |  | Advanced breast cancer - ER or PR positive Overall survival    | 0.86(0.71-1.04) |                                                                                                                                |
|  |  |  |  |  | Advanced breast cancer - ER and                                | 0.80(0.66-0.98) | Age, albumin, cardiovascular disease, diabetes, ECOG performance, ER/PR status, histological                                   |

|                                                                                                                            |                                                                                      |                                                |                                                                                                                                                    |                 |                                                                          |                                    |                               |                                                                                                                                                             |
|----------------------------------------------------------------------------------------------------------------------------|--------------------------------------------------------------------------------------|------------------------------------------------|----------------------------------------------------------------------------------------------------------------------------------------------------|-----------------|--------------------------------------------------------------------------|------------------------------------|-------------------------------|-------------------------------------------------------------------------------------------------------------------------------------------------------------|
|                                                                                                                            |                                                                                      |                                                |                                                                                                                                                    |                 | PR negative<br>Overall survival                                          |                                    |                               | grade, race, visceral involvement                                                                                                                           |
|                                                                                                                            |                                                                                      |                                                |                                                                                                                                                    |                 | Advanced breast cancer - ER or PR positive<br>Progression-free survival  |                                    | 0.87(0.74-1.02)               |                                                                                                                                                             |
|                                                                                                                            |                                                                                      |                                                |                                                                                                                                                    |                 | Advanced breast cancer - ER and PR negative<br>Progression-free survival |                                    | 0.87(0.73-1.03)               |                                                                                                                                                             |
| Nakatsukasa K, 2021 <sup>222</sup> , Oral Care-BC trial, Japan<br><br>BMI – Included, meta-analysis                        | Female, Secondary analysis of clinical trials (n=169)<br>Post-menopausal 100%        | Follow Up:<br>Maximum 13.9 months              | Metastatic hormone-receptor-positive HER2-negative breast cancer<br>Chemotherapy 12%,                                                              | Measured        | Progression-free survival                                                | >=25 vs <25 kg/m <sup>2</sup>      | 1.84(1.11-3.04) P trend=0.018 | Age, chemotherapy, endocrine therapy, metastasis, other factors, progesterone receptor status, study group                                                  |
| Orlandini LF, 2021 <sup>223</sup> , Brazil<br><br>BMI – Included, review                                                   | Female, Retrospective Cohort of Cancer Survivors (n=1664)                            | Diagnosed:1999-2013                            | Early breast cancer. Stage I-III                                                                                                                   | Medical records | All-cause mortality (n=531)                                              | >=30 vs <30 kg/m <sup>2</sup>      | 1.00(0.82-1.24)               | Age, grade, stage, tumor subtype                                                                                                                            |
|                                                                                                                            |                                                                                      |                                                |                                                                                                                                                    |                 | Cancer specific mortality (n=409)                                        |                                    | 0.96(0.75-1.22)               |                                                                                                                                                             |
|                                                                                                                            |                                                                                      |                                                |                                                                                                                                                    |                 | Relapse (n=482)                                                          |                                    | 1.01(0.82-1.24)               |                                                                                                                                                             |
|                                                                                                                            |                                                                                      |                                                |                                                                                                                                                    |                 | Postmenopausal All-cause mortality (n=531)                               |                                    | 1.06(0.82-1.37)               |                                                                                                                                                             |
|                                                                                                                            |                                                                                      |                                                |                                                                                                                                                    |                 | Postmenopausal Cancer specific mortality (n=409)                         |                                    | 0.96(0.70-1.32)               |                                                                                                                                                             |
|                                                                                                                            |                                                                                      |                                                |                                                                                                                                                    |                 | Postmenopausal Relapse (n=482)                                           |                                    | 1.08(0.82-1.41)               |                                                                                                                                                             |
| Polley MC, 2021 <sup>221</sup> , Pooled endocrine therapy (ET) trials, Multi-countrys<br><br>BMI – Included, meta-analysis | Female, Secondary analysis of clinical trials (n=891)<br>mean age:62<br>Mostly White | Follow Up:<br>Median 30.6 months               | Receptor-positive advanced breast cancer. ER positive 98.8%, negative 0.8%. PR positive 76.9%, negative 20.7%. HER2 positive 1.5%, negative 76.1%. | Measured        | Progression-free survival (n=672)                                        | Per 1 kg/m <sup>2</sup>            | 0.98(0.96-0.99) P trend=0.003 | Age, chemotherapy, ECOG performance, endocrine therapy, metastasis location, number of metastatic sites, other factors, pr status, radiotherapy, tumor size |
| Saleh K, 2021 <sup>224</sup> , Medical-Economical                                                                          | Female, Retrospective analysis,                                                      | Diagnosed:2008-2016 (diagnosed with metastatic | Metastatic breast cancer. Chemotherapy during 1st line (n): 8729                                                                                   | Medical records | Overall survival                                                         | ≥30 vs 18.5-24.9 kg/m <sup>2</sup> | 0.98(0.91-1.04)               | Age, chemotherapy, endocrine therapy, metastasis location,                                                                                                  |

|                                                                                                                                          |                                                                                                                                          |                                                                                                        |                                                                                                                                                                                    |                 |                                            |                                                     |                              |                                                                                                                                                                                               |                 |                                                                                  |
|------------------------------------------------------------------------------------------------------------------------------------------|------------------------------------------------------------------------------------------------------------------------------------------|--------------------------------------------------------------------------------------------------------|------------------------------------------------------------------------------------------------------------------------------------------------------------------------------------|-----------------|--------------------------------------------|-----------------------------------------------------|------------------------------|-----------------------------------------------------------------------------------------------------------------------------------------------------------------------------------------------|-----------------|----------------------------------------------------------------------------------|
| (ESME)-<br>Metastatic Breast<br>Cancer (MBC),<br>France<br><br>BMI – Included,<br>review                                                 | prospectively<br>collected data<br>(n=12999) mean<br>age:60,<br>Premenopausal<br>n=2307, Post-<br>menopausal<br>n=6190, Missing<br>4502. | breast cancer)<br>follow Up:<br>Median 48.6<br>months                                                  | Yes, 4270 No. Endocrine<br>therapy during 1st line<br>(n): 6078 Yes, 6921 No.                                                                                                      |                 |                                            |                                                     |                              | other covariates,<br>performance status,<br>subtype, targeted<br>therapy                                                                                                                      |                 |                                                                                  |
|                                                                                                                                          |                                                                                                                                          |                                                                                                        |                                                                                                                                                                                    |                 | First-line<br>progression free<br>survival |                                                     |                              |                                                                                                                                                                                               | 1.02(0.96-1.07) | Age, metastasis<br>location, other<br>covariates, performance<br>status, subtype |
|                                                                                                                                          |                                                                                                                                          |                                                                                                        |                                                                                                                                                                                    |                 | HR+/HER2-<br>Overall survival              |                                                     |                              |                                                                                                                                                                                               | 0.99(0.90-1.08) | Age, metastasis<br>location, other<br>covariates, performance<br>status          |
|                                                                                                                                          |                                                                                                                                          |                                                                                                        |                                                                                                                                                                                    |                 | HER2 positive<br>Overall survival          |                                                     |                              |                                                                                                                                                                                               | 0.97(0.82-1.14) | Age, other covariates,<br>performance status,<br>type of metastasis              |
|                                                                                                                                          |                                                                                                                                          |                                                                                                        |                                                                                                                                                                                    |                 | Triple-negative<br>Overall survival        |                                                     |                              |                                                                                                                                                                                               | 0.94(0.81-1.09) | Age, metastasis<br>location, other<br>covariates, performance<br>status, subtype |
| Shang, 2021 <sup>225</sup> ,<br>Chicago<br>Multiethnic<br>Epidemiologic<br>Breast Cancer<br>Cohort (ChiMEC)<br>USA<br><br>BMI - Excluded | Follow-up of<br>Case-control<br>Study (n=2888),<br>multi-ethnic                                                                          | Diagnosed: 2000-<br>2017 follow Up:<br>Median 6.4 years                                                | Non-metastatic breast<br>cancer. Stages 0-III                                                                                                                                      | Measured        | Overall survival                           | Per 5 kg/m <sup>2</sup>                             | 1.09 (0.99–1.20)             | Age, race, Carlson<br>comorbidity index,<br>tumor stage, histologic<br>grade, estrogen<br>receptor, progesterone<br>receptor, HER2,<br>radiotherapy, hormonal<br>therapy, and<br>chemotherapy |                 |                                                                                  |
|                                                                                                                                          |                                                                                                                                          |                                                                                                        |                                                                                                                                                                                    |                 | Breast cancer<br>survival                  |                                                     | 1.01 (0.87–1.16)             |                                                                                                                                                                                               |                 |                                                                                  |
|                                                                                                                                          |                                                                                                                                          |                                                                                                        |                                                                                                                                                                                    |                 | Disease free<br>survival                   |                                                     | 1.04 (0.96–1.13)             |                                                                                                                                                                                               |                 |                                                                                  |
| Tan X, 2021 <sup>122</sup> ,<br>China<br><br>BMI – Included,<br>meta-analysis                                                            | Female,<br>Retrospective<br>analysis,<br>prospective<br>collected data<br>(n=315)                                                        | Diagnosed:2003-<br>2010 follow Up:<br>Median 70.7<br>months , Loss to<br>Follow-up: 73<br>participants | Invasive breast cancer.<br>ER positive 202,<br>negative 113<br>participants. PR positive<br>204, negative 111<br>participants. HER2<br>positive 147, negative<br>168 participants. | Medical records | All-cause<br>mortality                     | Per 1 kg/m <sup>2</sup>                             | 0.95(0.87-1.03)              | Age, ER status, HER2<br>status , lymph node<br>metastasis , PR status,<br>tumor size                                                                                                          |                 |                                                                                  |
|                                                                                                                                          |                                                                                                                                          |                                                                                                        |                                                                                                                                                                                    |                 | Disease free<br>survival                   |                                                     | 0.98(0.90-1.07)              |                                                                                                                                                                                               |                 |                                                                                  |
|                                                                                                                                          |                                                                                                                                          |                                                                                                        |                                                                                                                                                                                    |                 | Recurrence (n=91)                          |                                                     | ≥30.00 vs ≤23.90             |                                                                                                                                                                                               | 1.29(0.26-6.38) |                                                                                  |
| Tong Y, 2021 <sup>361</sup> ,<br>China<br><br>BMI - Excluded                                                                             | Female,<br>Retrospective<br>Cohort of Cancer<br>Survivors                                                                                | Diagnosed:2009-<br>2018 (treatment)<br>follow Up:<br>Median 39.4                                       | Invasive HR-positive,<br>HER2-negative breast<br>cancer grade I 9%, II<br>60%, III 20%; PR-positive                                                                                | Measured        | Overall survival<br>(n=109)                | Non-overweight,<br>overweight and obese<br>patients | Similar 5-year OS<br>P=0.178 |                                                                                                                                                                                               |                 |                                                                                  |

|                                                                                                           |                                                                                     |                                                                   |                                                                                                                                                                                                                                                            |                   |                                      |                                           |                                                                                               |                                                                           |
|-----------------------------------------------------------------------------------------------------------|-------------------------------------------------------------------------------------|-------------------------------------------------------------------|------------------------------------------------------------------------------------------------------------------------------------------------------------------------------------------------------------------------------------------------------------|-------------------|--------------------------------------|-------------------------------------------|-----------------------------------------------------------------------------------------------|---------------------------------------------------------------------------|
|                                                                                                           | (n=1876) mean age:57<br>Pre-menopausal 35%, post-menopausal 65%                     | months                                                            | 88%, ALN-positive 17%<br>Breast conserving surgery 44%,<br>mastectomy 56%                                                                                                                                                                                  |                   | Disease free survival (n=109)        |                                           | Similar 5-year DFS<br>P=0.227                                                                 |                                                                           |
| Ahn HR, 2020 <sup>226</sup> ,<br>Korea<br><br>BMI – Excluded (mortality)<br>Included, review (recurrence) | Female,<br>Retrospective Cohort of Cancer Survivors (n=423) mean age:47.7           | Diagnosed:2010-2015 (surgery)<br>follow Up:<br>Median 70.1 months | Invasive ductal carcinoma 92.4%,<br>lobular carcinoma 3.1%,<br>medullary carcinoma 1.2%. ER positive 75.4%,<br>negative 24.6%. PR positive 70.9%, negative 29.1%. Radiotherapy 85.8%, hormone therapy 761%, target therapy 34.5%.                          | Medical records   | Overall survival                     | >=23 vs <23kg/m2                          | 0.71(0.23-2.18)                                                                               | Unadjusted                                                                |
|                                                                                                           |                                                                                     |                                                                   |                                                                                                                                                                                                                                                            |                   | Relapse-free survival                |                                           | 0.48(0.20-1.15)                                                                               |                                                                           |
| Bayraktar S, 2020 <sup>362</sup> , USA<br><br>BMI - Excluded                                              | Female,<br>Retrospective Cohort of Cancer Survivors (n=719)                         | Diagnosed:1997-208 follow Up:<br>Median 4.2 years                 | Clinical stage I-IV                                                                                                                                                                                                                                        | Medical records   | Overall survival                     | Normal/underweight<br>Overweight<br>Obese | 5-year rates<br>89.8(86.4-93.5)<br>88.0(83.8-92.4)<br>(P=0.26)<br>82.6(77.7-87.8)<br>(P=0.01) |                                                                           |
|                                                                                                           |                                                                                     |                                                                   |                                                                                                                                                                                                                                                            |                   | Disease recurrence                   |                                           | 80.9 (76.4- 85.6)<br>79.9 (74.7-85.4)<br>(P=0.72)<br>75.6 (70.1-81.6)<br>(P=0.11)             |                                                                           |
| Caleffi M, 2020 <sup>363</sup> ,<br>Brazil<br><br>BMI - Excluded                                          | Retrospective Cohort of Cancer Survivors (n=1113) mean age:52<br>Postmenopausal 64% | Diagnosed:1995-2017 follow Up:<br>Median 84 months                | Clinical stage 0 12.1%, I 50.6%, II 28.3%, III 7.4%, IV 1.3%. ER positive 76.7%, PR positive 76.7%, HER2 positive 19.5% Mastectomy 47%, breast conservative surgery 51.1%, adjuvant chemotherapy 41.7%, neoadjuvant chemotherapy 12.4%, radiotherapy 64.5% | Registry database | All-cause mortality (n=168)          |                                           | "None of the other variables were associated with mortality, including BMI"                   | Age at diagnosis, clinical stage, education, ki-67 expression, recurrence |
| Cantini L, 2020 <sup>364</sup> ,<br>Italy                                                                 | Female,<br>Retrospective Cohort of Cancer                                           | Diagnosed:2006-2016 (treatment)<br>follow Up:                     | HER2-Positive Early Breast Cancer Patients. Stage I 38.66%, II                                                                                                                                                                                             | Registry database | Distant disease-free survival (n=22) | <25 vs >=25                               | 1.05(0.44-2.49)                                                                               | Unadjusted                                                                |

|                                                                                                                                                                         |                                                                                                    |                                                                            |                                                                                                                                                                                                                                       |                 |                                                          |                                       |                                                                                       |                                                     |                                                   |                 |                                                  |
|-------------------------------------------------------------------------------------------------------------------------------------------------------------------------|----------------------------------------------------------------------------------------------------|----------------------------------------------------------------------------|---------------------------------------------------------------------------------------------------------------------------------------------------------------------------------------------------------------------------------------|-----------------|----------------------------------------------------------|---------------------------------------|---------------------------------------------------------------------------------------|-----------------------------------------------------|---------------------------------------------------|-----------------|--------------------------------------------------|
| BMI - Excluded                                                                                                                                                          | Survivors (n=238)<br>mean age:54<br>Premenopausal<br>41.60%,<br>postmenopausal<br>58.40%           | Median 66.2<br>months                                                      | 44.96%, III 15.97%,<br>undefined 0.42%.<br>Adjuvant chemotherapy<br>with anthracyclines and<br>taxanes 56.72%, taxanes<br>only 10.50%,<br>anthracyclines only<br>32.77%                                                               |                 |                                                          |                                       |                                                                                       |                                                     |                                                   |                 |                                                  |
|                                                                                                                                                                         |                                                                                                    | Diagnosed:2006-<br>2016 (treatment)<br>follow Up:<br>Maximum 3 years       |                                                                                                                                                                                                                                       |                 |                                                          |                                       |                                                                                       |                                                     | Distant disease-<br>free survival<br>(n=10)       | 0.33(0.09-1.20) |                                                  |
|                                                                                                                                                                         |                                                                                                    | Diagnosed:2006-<br>2016 (treatment)<br>follow Up:<br>Median 66.2<br>months |                                                                                                                                                                                                                                       |                 |                                                          |                                       |                                                                                       |                                                     | Distant disease-<br>free survival<br>(n=22)       | 1.11(0.76-1.63) | Chemotherapy, nodal<br>status, stage, tumor size |
|                                                                                                                                                                         |                                                                                                    | Diagnosed:2006-<br>2016 (treatment)<br>follow Up:<br>Maximum 3 years       |                                                                                                                                                                                                                                       |                 |                                                          |                                       |                                                                                       |                                                     | 3-year distant<br>disease-free<br>survival (n=10) | 1.79(1.04-3.07) |                                                  |
| Chen B, 2020 <sup>227</sup> ,<br>Sun Yat-sen<br>University Cancer<br>Center (SYSUCC),<br>China<br><br>BMI – Included,<br>review (mortality)<br>Excluded<br>(recurrence) | Female,<br>Retrospective<br>Cohort of Cancer<br>Survivors<br>(n=3891) age<br>range: 18-92<br>years | Diagnosed:2001-<br>2011                                                    | Primary breast cancer (I-<br>IV stages)<br>I/II 2806<br>III/IV 1085                                                                                                                                                                   | Medical records | Age 18-<40 years<br>Breast cancer-<br>specific mortality | ≥25 vs 18.5-24.9<br>kg/m <sup>2</sup> | 1.38(0.87-2.20)                                                                       | ER status, grade, HER2<br>status , PR status, stage |                                                   |                 |                                                  |
|                                                                                                                                                                         |                                                                                                    |                                                                            |                                                                                                                                                                                                                                       |                 |                                                          |                                       | Age 18-<40 years<br>Disease free<br>survival                                          |                                                     | 1.46(0.93-2.28)                                   |                 |                                                  |
| Corona SP,<br>2020 <sup>365</sup> , BALLETT<br>study, Europe<br><br>BMI - Excluded                                                                                      | Female,<br>Secondary<br>analysis of clinical<br>trials (n=687)                                     |                                                                            | Advanced or metastatic<br>hormone receptor-<br>positive breast cancer                                                                                                                                                                 | Measured        | Progression-free<br>survival                             | ≥25 vs <25 kg/m <sup>2</sup>          | Log-rank test P<0.001                                                                 |                                                     |                                                   |                 |                                                  |
|                                                                                                                                                                         |                                                                                                    |                                                                            |                                                                                                                                                                                                                                       |                 |                                                          | 30 vs <18.5 kg/m <sup>2</sup>         | 85.00(56.00-177.00)<br>61.00(56.00-78.00)<br>56.00(43.00-63.00)<br>58.00(36.00-72.00) |                                                     |                                                   |                 |                                                  |
| Da Silva JL,<br>2020 <sup>366</sup> , Brazil<br><br>BMI - Excluded                                                                                                      | Female,<br>Retrospective<br>Cohort of Cancer<br>Survivors (n=235)<br>mean age:50.1                 | Diagnosed:2010-<br>2014 follow Up:<br>Median 64.3<br>months                | Triple-negative breast<br>cancer. Stage (n): II 35,<br>III 200. Complete<br>standard Neo-adjuvant<br>chemotherapy (n): 196.<br>Post-NACT<br>complementary<br>treatment (n): Cisplatin<br>10, Capecitabine 6,<br>Radiotherapy 11. Type | Medical records | Overall survival<br>(n=101)                              | ≥30 vs <30 kg/m <sup>2</sup>          | 1.12(0.72-1.74) P<br>trend=0.620                                                      | Unadjusted                                          |                                                   |                 |                                                  |
|                                                                                                                                                                         |                                                                                                    |                                                                            |                                                                                                                                                                                                                                       |                 | Event free survival<br>(n=114)                           |                                       | 1.09(0.72-1.66) P<br>trend=0.683                                                      |                                                     |                                                   |                 |                                                  |

|                                                                                                               |                                                        |                                                  |                                                              |          |                                                   |                                    |                             |                                                       |
|---------------------------------------------------------------------------------------------------------------|--------------------------------------------------------|--------------------------------------------------|--------------------------------------------------------------|----------|---------------------------------------------------|------------------------------------|-----------------------------|-------------------------------------------------------|
|                                                                                                               |                                                        |                                                  | of surgery (n): Breast-conserving surgery 6, Mastectomy 229. |          |                                                   |                                    |                             |                                                       |
| Desmedt C, 2020 <sup>123</sup> , BIG 2-98 phase III trial, Multi-country<br><br>BMI – Included, meta-analysis | Female, Secondary analysis of clinical trials (n=2839) | Diagnosed:1998-2001 follow Up: Median 10.1 years | Early invasive breast cancer stage I-III                     | Measured | Docetaxel-free arm Overall survival (n=237)       | ≥30 vs 18.5-24.9 kg/m <sup>2</sup> | 1.10(0.78-1.54)<br>P=0.59   | Age, ER status, number of positive nodes, tumour size |
|                                                                                                               |                                                        |                                                  |                                                              |          |                                                   | Per 5 kg/m <sup>2</sup>            | 1.05(0.91-1.20)<br>P=0.50   |                                                       |
|                                                                                                               |                                                        |                                                  |                                                              |          | Docetaxel-based arm Overall survival (n=421)      | ≥30 vs 18.5-24.9 kg/m <sup>2</sup> | 1.63(1.27-2.09)<br>P=0.0001 |                                                       |
|                                                                                                               |                                                        |                                                  |                                                              |          |                                                   | Per 5 kg/m <sup>2</sup>            | 1.18(1.08-1.29)<br>P=0.0002 |                                                       |
|                                                                                                               |                                                        |                                                  |                                                              |          | Docetaxel-based arm ≥85% Overall survival (n=349) | ≥30 vs 18.5-24.9 kg/m <sup>2</sup> | 1.53(1.17-2.00)<br>P=0.002  |                                                       |
|                                                                                                               |                                                        |                                                  |                                                              |          | Docetaxel-free arm Disease free survival (n=349)  | ≥30 vs 18.5-24.9 kg/m <sup>2</sup> | 1.11(0.83-1.47)<br>P=0.49   |                                                       |
|                                                                                                               |                                                        |                                                  |                                                              |          |                                                   | Per 5 kg/m <sup>2</sup>            | 1.07(0.96-1.20)<br>P=0.22   |                                                       |
|                                                                                                               |                                                        |                                                  |                                                              |          | Docetaxel-based arm Disease free survival (n=663) | ≥30 vs 18.5-24.9 kg/m <sup>2</sup> | 1.32(1.08-1.62)<br>P=0.07   |                                                       |
|                                                                                                               |                                                        |                                                  |                                                              |          |                                                   | Per 5 kg/m <sup>2</sup>            | 1.07(1.00-1.15)<br>P=0.6    |                                                       |
|                                                                                                               |                                                        |                                                  |                                                              |          | Docetaxel-based arm ≥85% Disease free survival    | ≥30 vs 18.5-24.9 kg/m <sup>2</sup> | 1.28(1.02-1.59)<br>P=0.03   |                                                       |
|                                                                                                               |                                                        |                                                  |                                                              |          | Docetaxel-free arm Distant metastases             | ≥30 vs 18.5-24.9 kg/m <sup>2</sup> | 1.05(0.73-1.52)<br>P=0.79   |                                                       |
|                                                                                                               |                                                        |                                                  |                                                              |          | Docetaxel-based arm Distant metastases            | ≥30 vs 18.5-24.9 kg/m <sup>2</sup> | 1.19(0.91-1.55)<br>P=0.20   |                                                       |
| Docetaxel-free arm and ER+ Overall survival (n=148)                                                           | ≥30 vs 18.5-24.9 kg/m <sup>2</sup>                     | 1.02(0.65-1.59)<br>P=0.94                        |                                                              |          |                                                   |                                    |                             |                                                       |
|                                                                                                               | Per 5 kg/m <sup>2</sup>                                | 1.00(0.84-1.19)<br>P=0.98                        |                                                              |          |                                                   |                                    |                             |                                                       |
| Docetaxel-based arm and ER+                                                                                   | ≥30 vs 18.5-24.9 kg/m <sup>2</sup>                     | 1.67(1.21-2.32)<br>P=0.002                       |                                                              |          |                                                   |                                    |                             |                                                       |
|                                                                                                               | Per 5 kg/m <sup>2</sup>                                | 1.16(1.03-1.31)                                  |                                                              |          |                                                   |                                    |                             |                                                       |



|                                                                                       |                                                                                                         |                                                             |                                                                                                                       |          |                                                           |                                                               |                                                                                                                                                                            |                                                                               |
|---------------------------------------------------------------------------------------|---------------------------------------------------------------------------------------------------------|-------------------------------------------------------------|-----------------------------------------------------------------------------------------------------------------------|----------|-----------------------------------------------------------|---------------------------------------------------------------|----------------------------------------------------------------------------------------------------------------------------------------------------------------------------|-------------------------------------------------------------------------------|
|                                                                                       |                                                                                                         |                                                             |                                                                                                                       |          | Overall survival (n=242)                                  |                                                               | P=0.01                                                                                                                                                                     |                                                                               |
|                                                                                       |                                                                                                         |                                                             |                                                                                                                       |          | Docetaxel-free arm and ER-Overall survival (n=89)         | ≥30 vs 18.5-24.9 kg/m <sup>2</sup><br>Per 5 kg/m <sup>2</sup> | 1.20(0.71-2.02)<br>P=0.59<br>1.13(0.91-1.39)<br>P=0.28                                                                                                                     |                                                                               |
|                                                                                       |                                                                                                         |                                                             |                                                                                                                       |          | Docetaxel-based arm and ER-Overall survival (n=179)       | ≥30 vs 18.5-24.9 kg/m <sup>2</sup><br>Per 5 kg/m <sup>2</sup> | 1.59(1.08-2.35)<br>P=0.02<br>1.20(1.05-1.36)<br>P=0.006                                                                                                                    |                                                                               |
|                                                                                       |                                                                                                         |                                                             |                                                                                                                       |          | Docetaxel-free arm and ER+ Disease free survival (n=225)  | ≥30 vs 18.5-24.9 kg/m <sup>2</sup><br>Per 5 kg/m <sup>2</sup> | 1.14(0.79-1.63)<br>P=0.49<br>1.09(0.95-1.25)<br>P=0.23                                                                                                                     |                                                                               |
|                                                                                       |                                                                                                         |                                                             |                                                                                                                       |          | Docetaxel-based arm and ER+ Disease free survival (n=434) | ≥30 vs 18.5-24.9 kg/m <sup>2</sup><br>Per 5 kg/m <sup>2</sup> | 1.27(1.01-1.60)<br>P=0.04<br>1.04(0.95-1.14)<br>P=0.43                                                                                                                     |                                                                               |
|                                                                                       |                                                                                                         |                                                             |                                                                                                                       |          | Docetaxel-free arm and ER- Disease free survival (n=124)  | ≥30 vs 18.5-24.9 kg/m <sup>2</sup><br>Per 5 kg/m <sup>2</sup> | 1.07(0.67-1.70)<br>P=0.77<br>1.05(0.87-1.26)<br>P=0.62                                                                                                                     |                                                                               |
|                                                                                       |                                                                                                         |                                                             |                                                                                                                       |          | Docetaxel-based arm and ER- Disease free survival (n=529) | ≥30 vs 18.5-24.9 kg/m <sup>2</sup><br>Per 5 kg/m <sup>2</sup> | 1.35(0.95-1.91)<br>P=0.09<br>1.11(0.99-1.25)<br>P=0.07                                                                                                                     |                                                                               |
| Di Cosimo S, 2020 <sup>367</sup> , neoalto trial, Multi-country<br><br>BMI - Excluded | Female, Secondary analysis of clinical trials (n=455) mean age:50 Premenopausal 48%, postmenopausal 42% | Diagnosed:2008-2010 (treatment) follow Up: Median 6.7 years | HER2-positive breast cancer. HR negative 49%, positive 51%. Conservative surgery 29%, mastectomy 71%.                 | Measured | Event free survival (n=127)                               | ≥30 vs <18.49 kg/m <sup>2</sup>                               | Log-rank P=0.763<br><br>"Baseline BMI, either as a continuous or a categorical variable, was not significantly associated with EFS (overall or in the HR-positive cohort)" |                                                                               |
| Engkakul T, 2020 <sup>228</sup> , Thailand<br><br>BMI – Included, review              | Female, Retrospective Cohort of Cancer Survivors (n=400) mean age:52,                                   | Diagnosed:2004-2011 , Loss to Follow-up: 1                  | Breast cancer. Stage (n): IA 6, IIA 163, IIB 80, IIIA 66, IIIB 33, IIIC 52. Hormone receptor status (n): Negative 91, | Measured | Overall survival (n=52)                                   | ≥25 vs <24.9 kg/m <sup>2</sup>                                | 0.77(0.43-1.39)                                                                                                                                                            | Age, chemotherapy, comorbidity, HER2 status , hormonal receptor status, lymph |

|                                                                               |                                                                                                      |                                                                         |                                                                                                                                                                                                |                 |                                                          |                       |                               |                                                                                                      |
|-------------------------------------------------------------------------------|------------------------------------------------------------------------------------------------------|-------------------------------------------------------------------------|------------------------------------------------------------------------------------------------------------------------------------------------------------------------------------------------|-----------------|----------------------------------------------------------|-----------------------|-------------------------------|------------------------------------------------------------------------------------------------------|
|                                                                               | Premenopausal n=211, Postmenopausal n=199                                                            | Diagnosed:2004-2011 follow Up: Median 65 months , Loss to Follow-up: 84 | Positive 309. HER2 status (n): Negative 270, Positive 100, Unknown 30. Types of surgery (n): BCS 90, Mastectomy 308. Chemotherapy (n): No 48, Yes 352. Hormonal treatment (n): No 95, Yes 305. |                 | Disease free survival (n=52)                             |                       | 0.72(0.46-1.13) P trend=0.159 | node status, tumor stage                                                                             |
| Fadelu T, 2020 <sup>124</sup> , Haiti<br><br>BMI – Included, meta-analysis    | Female, Retrospective Cohort of Cancer Survivors (n=224) mean age:49.1, Postmenopausal 36.2%.        | Diagnosed:2012-2016 Follow Up: Median 21.7 months                       | Nonmetastatic breast cancer. Locally advance disease 58.5%. ER positive 61.8%. Neoadjuvant chemotherapy 45.1%. Adjuvant chemotherapy 82.6%.                                                    | Medical records | Disease free survival (n=80.0)                           | >30kg/m2 vs <25 kg/m2 | 0.85(0.50-1.45)               | Clinical stage, ER status, menopausal status, time to definitive treatment, residence                |
|                                                                               |                                                                                                      |                                                                         |                                                                                                                                                                                                |                 | Receiving adjuvant chemotherapy Disease free survival    |                       | 1.61(0.76-3.42)               | Clinical stage, ER status, menopausal status, time to definitive treatment, residence, weight change |
| Godina C, 2020 <sup>229</sup> , BCBlood, Sweden<br><br>BMI – Included, review | Female, Prospective Cohort of Cancer Survivors (n=814) mean age:63.9, Other Characteristics: Elderly | Diagnosed:2002-2012 Follow Up: Median 7 years                           | Breast cancer histological grade I 26.0%, II 51.2%, III 22.7%; ER+ 88.8%, PR+ 70.0% Surgery                                                                                                    | Medical records | Death from any cause (n=111)                             | >=25 vs <25 kg/m^2    | 2.00(1.32-3.04)               | Age, ER status, hormonal therapy, nodal status, tumor grade, tumor size                              |
|                                                                               |                                                                                                      |                                                                         |                                                                                                                                                                                                |                 | Recurrence risk (n=119)                                  |                       | 1.54(1.06-2.25)               |                                                                                                      |
|                                                                               |                                                                                                      |                                                                         |                                                                                                                                                                                                |                 | ER positive Death from any cause (n=119)                 |                       | 1.99(1.25-3.17)               |                                                                                                      |
|                                                                               |                                                                                                      |                                                                         |                                                                                                                                                                                                |                 | ER negative Death from any cause (n=119)                 |                       | 2.07(0.78-5.47)               |                                                                                                      |
|                                                                               |                                                                                                      |                                                                         |                                                                                                                                                                                                |                 | ER positive Recurrence risk (n=119)                      |                       | 1.58(1.05-2.39)               |                                                                                                      |
|                                                                               |                                                                                                      |                                                                         |                                                                                                                                                                                                |                 | ER negative Recurrence risk (n=119)                      |                       | 1.68(0.63-4.51)               |                                                                                                      |
|                                                                               |                                                                                                      |                                                                         |                                                                                                                                                                                                |                 | ER+, aromatase inhibitor Death from any cause (n=119)    |                       | 2.16(1.07-4.37)               |                                                                                                      |
|                                                                               |                                                                                                      |                                                                         |                                                                                                                                                                                                |                 | ER+, no aromatase inhibitor Death from any cause (n=119) |                       | 2.00(1.05-3.80)               |                                                                                                      |

|                                                                                   |                                                                       |                                                   |                                                                                                                                                                               |                 |                                                                                                                                                                                                                                                                                                                                                                                                                                                                                                      |                                    |                                                                                                                                                                                                                                                       |                                                                                                                        |
|-----------------------------------------------------------------------------------|-----------------------------------------------------------------------|---------------------------------------------------|-------------------------------------------------------------------------------------------------------------------------------------------------------------------------------|-----------------|------------------------------------------------------------------------------------------------------------------------------------------------------------------------------------------------------------------------------------------------------------------------------------------------------------------------------------------------------------------------------------------------------------------------------------------------------------------------------------------------------|------------------------------------|-------------------------------------------------------------------------------------------------------------------------------------------------------------------------------------------------------------------------------------------------------|------------------------------------------------------------------------------------------------------------------------|
|                                                                                   |                                                                       |                                                   |                                                                                                                                                                               |                 | ER+, aromatase inhibitor<br>Recurrence risk<br>(n=119)                                                                                                                                                                                                                                                                                                                                                                                                                                               |                                    | 1.66(0.88-3.13)                                                                                                                                                                                                                                       |                                                                                                                        |
|                                                                                   |                                                                       |                                                   |                                                                                                                                                                               |                 | ER+, no aromatase inhibitor<br>Recurrence risk<br>(n=119)                                                                                                                                                                                                                                                                                                                                                                                                                                            |                                    | 1.72(0.98-3.02)                                                                                                                                                                                                                                       |                                                                                                                        |
| Gondo N, 2020 <sup>125</sup><br>Aichi, Japan<br><br>BMI – Included, meta-analysis | Female, Retrospective Cohort of Cancer Survivors (n=3223) mean age:54 | Diagnosed:2003-2014<br>Median follow-up 57 months | Stage I-IIIc invasive carcinoma. 414 participants received neoadjuvant. 327 participants received preoperative chemotherapy and 87 participants preoperative hormone therapy. | Medical records | Overall survival (n=189)<br>Cancer specific mortality (n=137)<br>Disease free survival (n=329)<br>Premenopausal Overall survival<br>Postmenopausal Overall survival<br>Premenopausal Cancer specific mortality<br>Postmenopausal Cancer specific mortality<br>Premenopausal Disease- free survival<br>Postmenopausal Disease free survival<br>Premenopausal ER+ Overall survival<br>Premenopausal ER- Overall survival<br>Postmenopausal ER+ Overall survival<br>Postmenopausal ER- Overall survival | ≥30 vs 18.5-24.9 kg/m <sup>2</sup> | 2.43(1.38-4.28)<br>2.73 (1.15-6.64)<br>1.83(1.11-3.02)<br>2.00(0.78-5.12)<br>3.59(1.76-7.30)<br>2.47(0.95-6.42)<br>3.06(1.18-7.87)<br>2.45(1.27-4.73)<br>1.85(0.92-3.66)<br>1.27(0.30-5.43)<br>2.26(0.56-9.18)<br>4.87(2.15-11.04)<br>1.84(0.42-8.10) | Age, chemotherapy, histological grade, hormonal therapy, menopausal status, number of positive lymph nodes, tumor size |

|                                                      |                                                                        |                                                 |                                                                                                                                                                                                                                                                                       |                 |                                              |                                     |                  |                                        |
|------------------------------------------------------|------------------------------------------------------------------------|-------------------------------------------------|---------------------------------------------------------------------------------------------------------------------------------------------------------------------------------------------------------------------------------------------------------------------------------------|-----------------|----------------------------------------------|-------------------------------------|------------------|----------------------------------------|
|                                                      |                                                                        |                                                 |                                                                                                                                                                                                                                                                                       |                 | Premenopausal ER+ Cancer specific mortality  |                                     | 1.66(0.39-7.22)  |                                        |
|                                                      |                                                                        |                                                 |                                                                                                                                                                                                                                                                                       |                 | Premenopausal ER- Cancer specific mortality  |                                     | 2.14(0.36-9.63)  |                                        |
|                                                      |                                                                        |                                                 |                                                                                                                                                                                                                                                                                       |                 | Postmenopausal ER+ Cancer specific mortality |                                     | 4.51(1.52-13.34) |                                        |
|                                                      |                                                                        |                                                 |                                                                                                                                                                                                                                                                                       |                 | Postmenopausal ER- Cancer specific mortality |                                     | 1.37(0.17-10.00) |                                        |
|                                                      |                                                                        |                                                 |                                                                                                                                                                                                                                                                                       |                 | Premenopausal ER+ Disease free survival      |                                     | 2.04(0.88-4.74)  |                                        |
|                                                      |                                                                        |                                                 |                                                                                                                                                                                                                                                                                       |                 | Premenopausal ER- Disease free survival      |                                     | 2.02(0.60-6.85)  |                                        |
|                                                      |                                                                        |                                                 |                                                                                                                                                                                                                                                                                       |                 | Postmenopausal ER+ Disease free survival     |                                     | 4.87(1.02-4.89)  |                                        |
|                                                      |                                                                        |                                                 |                                                                                                                                                                                                                                                                                       |                 | Postmenopausal ER- Disease free survival     |                                     | 1.18(0.27-5.10)  |                                        |
| Huh J, 2020 <sup>368</sup> , Korea<br>BMI - Excluded | Female, Retrospective Cohort of Cancer Survivors (n=577) mean age:48.9 | Diagnosed:2012-2014 follow Up: Median 74 months | Non-metastatic invasive breast cancer. ER negative 26.3%, positive 73.3%, unknown 0.4%. PR negative 34.8%, positive 64.8%, unknown 0.4%. HER2 negative 81.5%, positive 17.5%, unknown 1.0%. Neoadjuvant chemotherapy 22.5%. Adjuvant chemotherapy 57.7%. Adjuvant radiotherapy 19.2%. | Medical records | Overall survival (n=49)                      | >23.01 vs <=23.01 kg/m <sup>2</sup> | 0.68(0.39-1.19)  | Unadjusted                             |
|                                                      |                                                                        |                                                 |                                                                                                                                                                                                                                                                                       |                 | Age >50y Overall survival                    | >23.6 vs <=23.6 kg/m <sup>2</sup>   | 0.63(0.29-1.38)  |                                        |
| Krasniqi E, 2020 <sup>230</sup> , Italy              | Female, Retrospective                                                  |                                                 |                                                                                                                                                                                                                                                                                       | Measured        | Overall survival                             | >23.6 vs <=23.6 kg/m <sup>2</sup>   | 1.29(1.09-1.52)  | Age, chemotherapy, histological grade, |

|                                                                           |                                                                                                         |                                                 |                                                                                                                                                                                                                                         |               |                                                          |                                    |                               |                                                                                                                                                                                    |
|---------------------------------------------------------------------------|---------------------------------------------------------------------------------------------------------|-------------------------------------------------|-----------------------------------------------------------------------------------------------------------------------------------------------------------------------------------------------------------------------------------------|---------------|----------------------------------------------------------|------------------------------------|-------------------------------|------------------------------------------------------------------------------------------------------------------------------------------------------------------------------------|
| BMI – Included, review                                                    | analysis, prospectively collected data (n=709) mean age:54                                              |                                                 | HER2-positive metastatic breast cancer                                                                                                                                                                                                  |               | Progression-free survival (n=575)                        |                                    | 1.09(0.97-1.21)               | hormonal therapy, menopausal status, number of positive lymph nodes, tumor size                                                                                                    |
| Liu G, 2020 <sup>231</sup> , China<br>BMI – Included, review              | Female, Follow-up of Case-control Study (n=480) Mean age:49.6 Chinese                                   | Follow Up: Maximum 80 months                    | Breast cancer stage I-II 54.2%, III-IV 45.8%; ER positive 42.7%, PR positive 48.5%, HER2 positive 67.5% Radiation 33.8%, chemotherapy 66.3%                                                                                             | Measured      | Breast cancer survival                                   | >24 vs <=24 kg/m <sup>2</sup>      | 0.87(0.38-2.00)               | Age, alcohol intake, smoking                                                                                                                                                       |
| Oudanonh T, 2020 <sup>126</sup> , Canada<br>BMI – Included, meta-analysis | Female, Retrospective analysis, prospectively collected data (n=3747) Mean age:58.4 Post-menopausal 72% | Diagnosed:1995-2010 follow Up: Median 5.9 years | ER-positive non-metastatic breast cancer stage I 47.7%, II 41.1%, 11.2%; grade 1 34.7%, 2 46.8%, 3 18.5%; PR-negative 22.5%; HER2-negative 70.9% Radiotherapy 81.7%; hormone replacement therapy never 54.6%, ever 27.3%, current 18.1% | Self-reported | All-cause mortality (n=444)                              | ≥30 vs 18.5-24.9 kg/m <sup>2</sup> | 1.48(1.13-1.93) P het=0.004   | Age at diagnosis, endocrine therapy, family history, hormone replacement therapy use, menopausal status, other factors, pr status, radiotherapy, smoking, tumor grade, tumor stage |
|                                                                           |                                                                                                         |                                                 |                                                                                                                                                                                                                                         |               | Breast cancer survival (n=234)                           |                                    | 1.33(0.91-1.91) P het =0.16   |                                                                                                                                                                                    |
|                                                                           |                                                                                                         |                                                 |                                                                                                                                                                                                                                         |               | Pre-menopausal All-cause mortality (n=106)               |                                    | 1.08(0.56-2.08) P het =0.07   |                                                                                                                                                                                    |
|                                                                           |                                                                                                         |                                                 |                                                                                                                                                                                                                                         |               | Post-menopausal All-cause mortality (n=338)              |                                    | 1.56(1.16-2.10) P het =0.01   |                                                                                                                                                                                    |
|                                                                           |                                                                                                         |                                                 |                                                                                                                                                                                                                                         |               | Pre-menopausal Breast cancer-specific mortality (n=87)   |                                    | 0.66(0.29-1.48) P het =0.08   |                                                                                                                                                                                    |
|                                                                           |                                                                                                         |                                                 |                                                                                                                                                                                                                                         |               | Post-menopausal Breast cancer-specific mortality (n=147) |                                    | 1.67(1.08-2.57) P het =0.10   |                                                                                                                                                                                    |
|                                                                           |                                                                                                         |                                                 |                                                                                                                                                                                                                                         |               | PR positive All-cause mortality (n=292)                  |                                    | 1.15(0.82-1.62) P het =0.74   |                                                                                                                                                                                    |
|                                                                           |                                                                                                         |                                                 |                                                                                                                                                                                                                                         |               | PR negative All-cause mortality (n=152)                  |                                    | 2.33(1.51-3.60) P het =0.0001 |                                                                                                                                                                                    |
|                                                                           |                                                                                                         |                                                 |                                                                                                                                                                                                                                         |               | PR positive Breast cancer-specific mortality (n=145)     |                                    | 1.24(0.78-1.97) P het =0.67   |                                                                                                                                                                                    |
| PR negative Breast cancer-specific mortality (n=89)                       | 1.52(0.82-2.80) P het =0.01                                                                             |                                                 |                                                                                                                                                                                                                                         |               |                                                          |                                    |                               |                                                                                                                                                                                    |

|                                                                              |                                                                                                                                        |                                                                                                                       |                                                                                                                                                                                                                         |                   |                                             |                                           |                                                                                                                                                                                                      |                                                                                                                                                   |
|------------------------------------------------------------------------------|----------------------------------------------------------------------------------------------------------------------------------------|-----------------------------------------------------------------------------------------------------------------------|-------------------------------------------------------------------------------------------------------------------------------------------------------------------------------------------------------------------------|-------------------|---------------------------------------------|-------------------------------------------|------------------------------------------------------------------------------------------------------------------------------------------------------------------------------------------------------|---------------------------------------------------------------------------------------------------------------------------------------------------|
| Patel V, 2020 <sup>369</sup> ,<br>New Zealand<br><br>BMI - Excluded          | Female,<br>Retrospective<br>Cohort of Cancer<br>Survivors<br>(n=2513) mean<br>age:56<br>Premenopausal<br>35%,<br>postmenopausal<br>65% | Diagnosed:1991-<br>2014 (treatment)<br>follow Up:<br>Median 5.25 years<br>, Loss to Follow-<br>up: 83<br>participants | Early stage breast<br>cancer. Tumor grade 1<br>22%, 2 44%, 3 1%. ER<br>negative 21%, positive<br>77%, unknown 2%. CFRT<br>radiation 45%, HFRT<br>55%. Adjuvant hormone<br>therapy 66%, adjuvant<br>chemotherapy 47%.    | Registry database | All-cause<br>mortality                      | High BMI vs Normal<br>weight              | 1.01(0.74-1.38)                                                                                                                                                                                      |                                                                                                                                                   |
|                                                                              |                                                                                                                                        |                                                                                                                       |                                                                                                                                                                                                                         |                   | Cancer specific<br>mortality                |                                           | 1.09(0.84-1.40)                                                                                                                                                                                      |                                                                                                                                                   |
|                                                                              |                                                                                                                                        |                                                                                                                       |                                                                                                                                                                                                                         |                   | Disease free<br>survival                    |                                           | BMI was not<br>significantly<br>associated<br>with the primary or<br>secondary outcomes<br>in the entire cohort<br>or when analyzed<br>separately as<br>premenopausal or<br>postmenopausal<br>groups |                                                                                                                                                   |
|                                                                              |                                                                                                                                        |                                                                                                                       |                                                                                                                                                                                                                         |                   | Local recurrence-<br>free survival          |                                           |                                                                                                                                                                                                      |                                                                                                                                                   |
|                                                                              |                                                                                                                                        |                                                                                                                       |                                                                                                                                                                                                                         |                   | Locoregional<br>recurrence-free<br>survival |                                           |                                                                                                                                                                                                      |                                                                                                                                                   |
| Schmidt G,<br>2020 <sup>370</sup> , Germany<br><br>BMI - Excluded            | Female,<br>Retrospective<br>Cohort of Cancer<br>Survivors (n=197)<br>premenopausal<br>29.4%,<br>postmenopausal<br>70.6%                | Follow Up:<br>Median 41.43<br>months                                                                                  | Triple-negative breast<br>cancer. Grade G1 1%,<br>G2 29.5%, G3 66.5%.<br>Neoadjuvant<br>chemotherapy 42.7%,<br>pcr after neoadjuvant<br>chemotherapy 40.5%,<br>adjuvant chemotherapy<br>44.1%, no<br>chemotherapy 13.2% | Registry database | Overall survival                            | Overweight/obese vs<br>Underweight/normal | Log-rank P=0.4720                                                                                                                                                                                    |                                                                                                                                                   |
|                                                                              |                                                                                                                                        |                                                                                                                       |                                                                                                                                                                                                                         |                   | Disease free<br>survival                    |                                           | Log-rank P=0.327                                                                                                                                                                                     |                                                                                                                                                   |
| Tiainen S, 2020 <sup>232</sup> ,<br>Finland<br><br>BMI – Included,<br>review | Female,<br>Retrospective<br>Cohort of Cancer<br>Survivors (n=262)<br>mean age:58.7                                                     | Diagnosed:2002-<br>2008 (treatment)<br>follow Up:<br>Median 9.7 years                                                 | Breast cancer pt1 55%,<br>pt2 36%, pt3 4%, pt4<br>5%; pn0 37%, pn1 44%,<br>pn2 13%, pn3 6%; HER2-<br>positive 49%, ER-<br>positive 72%, PR-<br>positive 62% Surgery                                                     | Measured          | Overall survival<br>(n=70)                  | >=30 vs <30 kg/m <sup>2</sup>             | 1.86 (1.06-3.26)                                                                                                                                                                                     | Nodal status, very<br>low density, tumour<br>size, HER2, ER, CD163+<br>tumor associated<br>macrophages, stromal<br>hyaluronan, type 2<br>diabetes |
|                                                                              |                                                                                                                                        |                                                                                                                       |                                                                                                                                                                                                                         |                   | Breast cancer<br>survival (n=52)            |                                           | 1.75(0.89-3.45)                                                                                                                                                                                      |                                                                                                                                                   |

|                                                                                                                                |                                                                                                                      |                                                             |                                                                                                                                                                                                                                                                                                                         |                   |                                 |                         |                                                                                                        |                                                                       |
|--------------------------------------------------------------------------------------------------------------------------------|----------------------------------------------------------------------------------------------------------------------|-------------------------------------------------------------|-------------------------------------------------------------------------------------------------------------------------------------------------------------------------------------------------------------------------------------------------------------------------------------------------------------------------|-------------------|---------------------------------|-------------------------|--------------------------------------------------------------------------------------------------------|-----------------------------------------------------------------------|
| Tong Y, 2020 <sup>371</sup> , China<br>BMI - Excluded                                                                          | Female, Retrospective Cohort of Cancer Survivors (n=679) mean age:53.04 Pre/peri-menopausal 42%, post-menopausal 58% | Diagnosed:2012-2017 (treatment) follow Up: Median 36 months | Breast cancer histological grade I-II 34%, III 66% ; invasive ductal carcinoma 94.55%; ER-positive 44%, PR-positive 27% Mastectomy 77.91%, sentinel lymph node biopsy 58.76%; adjuvant radiotherapy 89%, adjuvant targeted therapy 80%, adjuvant endocrine therapy 44%                                                  | Registry database | Overall survival (n=15)         |                         | "A modest but insignificant interaction of IGF-1 and BMI in predicting OS (P for interaction = 0.054)" |                                                                       |
|                                                                                                                                |                                                                                                                      |                                                             |                                                                                                                                                                                                                                                                                                                         |                   | Recurrence free survival (n=52) |                         |                                                                                                        |                                                                       |
| Walsh SM, 2020 <sup>127</sup> , Memorial Sloan Kettering Cancer Center, New York (MSKCC), USA<br>BMI – Included, meta-analysis | Female, Retrospective Cohort of Cancer Survivors (n=666) mean age:55                                                 | Diagnosed:2005-2010 (treatment) Median 6.1 years            | Stage 0-I 46.7%, II 33.9%, III 15.8%, missing 3.6%. ER positive 66.4%, negative 32.9%. PR positive 51.8%, negative 47.1%. Breast-conservative surgery 51.1%, mastectomy 48.6%, no surgery 0.3%. Axillary surgery SLNB 52.9%, ALND 44.6%, missing 2.1%. Chemotherapy 35.1%. Endocrine therapy 61.3%. Radiotherapy 63.4%. | Registry database | Overall survival (n=115)        | Per 1 kg/m <sup>2</sup> | 1.01(0.98-1.04) P trend=0.579                                                                          | Age, ER status, HER2 status , mastectomy, nodal status, tumor stage   |
|                                                                                                                                |                                                                                                                      |                                                             |                                                                                                                                                                                                                                                                                                                         |                   | Disease free survival (n=118)   |                         | 1.01(0.98-1.04) P trend=0.432                                                                          |                                                                       |
| Abdel-Rahman O, 2019 <sup>372</sup> , Breast Johnson 126 and Breast elieli 2008_168, Multi-national<br>BMI - Excluded          | Secondary analysis of clinical trials (n=604)                                                                        |                                                             |                                                                                                                                                                                                                                                                                                                         | Registry database | Overall survival                | Per 1 unit              | 0.09(0.01-0.65)                                                                                        | Age, chemotherapy, hormone receptor status, metastasis, other factors |
|                                                                                                                                |                                                                                                                      |                                                             |                                                                                                                                                                                                                                                                                                                         |                   | Time to progression             |                         | 0.22(0.03-1.46)                                                                                        |                                                                       |

|                                                                              |                                                                                                                         |                                                  |                                                                                                                                                                                                                                                                                                                                                                                                                                                                                                                  |                 |                                 |                                   |                             |                                                                                                                                                   |
|------------------------------------------------------------------------------|-------------------------------------------------------------------------------------------------------------------------|--------------------------------------------------|------------------------------------------------------------------------------------------------------------------------------------------------------------------------------------------------------------------------------------------------------------------------------------------------------------------------------------------------------------------------------------------------------------------------------------------------------------------------------------------------------------------|-----------------|---------------------------------|-----------------------------------|-----------------------------|---------------------------------------------------------------------------------------------------------------------------------------------------|
| Al-Saleh K, 2019 <sup>233</sup> , Saudi Arabia<br><br>BMI – Included, review | Female, Retrospective Cohort of Cancer Survivors (n=246) mean age:49.8                                                  | Diagnosed:2005-2010                              | Stage II 35%, IIIA 65%. Luminal A 23.2%, B 45.1%, triple-negative 16.7%, HER2-neu positive 15%. 63% treated with sequential dose dense AC-T chemotherapy consisting of 60mg/m2 doxorubicin i.v. On day 1 and 600mg/m2 cyclophosphamide i.v. For 4 cycles followed by 4 cycles of 75mg/m2 docetaxel on day 1 every 2 weeks. 37% received FEC100-taxotere chemotherapy. Adjuvant trastuzumab was given to Her 2neu positive patients. Endocrine adjuvant was offered to women with ER positive and/or PR positive. | Medical records | Overall survival (n=59)         | ≥30.1 vs ≤24.99 kg/m <sup>2</sup> | 1.60(0.90-1.80)             | Clinical stage, ER status, HER2 status, menopausal status, operation type, PR status, tumor grade, tumor histology, tumor site, vascular invasion |
|                                                                              |                                                                                                                         |                                                  |                                                                                                                                                                                                                                                                                                                                                                                                                                                                                                                  |                 | Disease free survival (n=59)    |                                   | 1.40(0.80-1.60)             |                                                                                                                                                   |
| Ayoub NM, 2019 <sup>234</sup> , Jordan<br><br>BMI – Included, review         | Female, Retrospective Cohort of Cancer Survivors (n=348) mean age:50.98, Premenopausal (n=153), Postmenopausal (n=195). | Diagnosed:2004-2014. Follow Up: Maximum 11 years | Breast cancer. Site (n): Right 159, Left 180, Bilateral 9. Tumor stage (n): I 18, II 170, III 101, IV 59. ER status (n): Positive 258, Negative 90. PR status (n): Positive 234, Negative 114. HER2 status (n): Positive 84, Negative 264. Surgery (n): None 6, Mastectomy 318, Breast conservation 18, Unknown 6. Adjuvant chemotherapy (n): Yes 282, No 26, Unknown 40.                                                                                                                                        | Measured        | Death from any cause (n=16)     | ≥30 vs <29.9 kg/m <sup>2</sup>    | 2.38(0.80-7.10)<br>P=0.1102 | Stage                                                                                                                                             |
|                                                                              |                                                                                                                         |                                                  |                                                                                                                                                                                                                                                                                                                                                                                                                                                                                                                  |                 | Breast cancer recurrence (n=56) |                                   | 2.22(1.20-4.09)<br>P=0.0110 | Grade, lymph vascular invasion                                                                                                                    |



|                                                                                            |                                                                             |                                                           |            |                 |                                           |                                |                                                                                    |                                                    |                                                    |
|--------------------------------------------------------------------------------------------|-----------------------------------------------------------------------------|-----------------------------------------------------------|------------|-----------------|-------------------------------------------|--------------------------------|------------------------------------------------------------------------------------|----------------------------------------------------|----------------------------------------------------|
| Blair CK, 2019 <sup>128</sup> ,<br>New Mexico, USA<br><br>BMI – Included,<br>meta-analysis | Female, Case-<br>cohort Study<br>(n=859)<br>Non-Hispanic/<br>Hispanic White | Diagnosed:1997-<br>2009 follow Up:<br>Median 94<br>months | Stage I-IV | Medical records | Cancer specific<br>mortality<br>(n=697.0) | ≥30 vs <29.9 kg/m <sup>2</sup> | 1.33(0.95-1.84)                                                                    | Age, ethnicity, stage at<br>diagnosis, tumor grade |                                                    |
|                                                                                            |                                                                             |                                                           |            |                 |                                           |                                | 1.41(0.91-2.18)                                                                    |                                                    |                                                    |
|                                                                                            |                                                                             |                                                           |            |                 |                                           |                                | 1.62(0.49-5.33)                                                                    |                                                    |                                                    |
|                                                                                            |                                                                             |                                                           |            |                 |                                           |                                | HER2-E Cancer<br>specific mortality<br>(n=48.0)                                    | 1.09(0.14-8.84)                                    | Age, ethnicity                                     |
|                                                                                            |                                                                             |                                                           |            |                 |                                           |                                | Triple-negative<br>Cancer specific<br>mortality<br>(n=113.0)                       | 1.04(0.42-2.54)                                    | Age, ethnicity, stage at<br>diagnosis, tumor grade |
|                                                                                            |                                                                             |                                                           |            |                 |                                           |                                | Premenopausal,<br>luminal A Cancer<br>specific mortality<br>(n=99.0)               | 2.10(0.80-5.10)                                    |                                                    |
|                                                                                            |                                                                             |                                                           |            |                 |                                           |                                | Premenopausal,<br>luminal B Cancer<br>specific mortality<br>(n=43.0)               | 1.50(0.30-7.50)                                    |                                                    |
|                                                                                            |                                                                             |                                                           |            |                 |                                           |                                | Premenopausal,<br>HER-2<br>overexpressing<br>Cancer specific<br>mortality (n=21.0) | NA                                                 |                                                    |
|                                                                                            |                                                                             |                                                           |            |                 |                                           |                                | Premenopausal,<br>triple-negative<br>Cancer specific<br>mortality (n=44.0)         | 1.20(0.20-7.10)                                    |                                                    |
|                                                                                            |                                                                             |                                                           |            |                 |                                           |                                | Postmenopausal,<br>luminal A Cancer<br>specific mortality<br>(n=21.0)              | 1.20(0.70-1.90)                                    | Age, ethnicity, stage at<br>diagnosis, tumor grade |
|                                                                                            |                                                                             |                                                           |            |                 |                                           |                                | Postmenopausal,<br>luminal B Cancer<br>specific mortality<br>(n=85.0)              | 1.10(0.10-8.10)                                    |                                                    |
|                                                                                            |                                                                             |                                                           |            |                 |                                           |                                | Postmenopausal,<br>Her-2                                                           | NA                                                 |                                                    |

|                                                                                                                 |                                                                                                                                     |                                                             |                                                                                                                                                       |                                  |                                                                             |                                        |                            |                                                                                                                                      |
|-----------------------------------------------------------------------------------------------------------------|-------------------------------------------------------------------------------------------------------------------------------------|-------------------------------------------------------------|-------------------------------------------------------------------------------------------------------------------------------------------------------|----------------------------------|-----------------------------------------------------------------------------|----------------------------------------|----------------------------|--------------------------------------------------------------------------------------------------------------------------------------|
|                                                                                                                 |                                                                                                                                     |                                                             |                                                                                                                                                       |                                  | overexpressing<br>Cancer specific<br>mortality (n=27.0)                     |                                        |                            |                                                                                                                                      |
|                                                                                                                 |                                                                                                                                     |                                                             |                                                                                                                                                       |                                  | Postmenopausal,<br>triple-negative<br>Cancer specific<br>mortality (n=69.0) |                                        | 1.10(0.30-3.60)            |                                                                                                                                      |
| Burkheimer, 2019 <sup>276</sup><br><br>BMI - Excluded                                                           | Retrospective<br>cohort study<br>(n= 1566 )                                                                                         | 2009 - 2012<br>Follow up= 84<br>months                      | Grade I-III                                                                                                                                           | From records,<br>Pre-surgery BMI | 5-year overall<br>survival                                                  | Obese vs Normal<br>weight              | P = 0.297                  | Unadjusted                                                                                                                           |
| Cacho-Díaz B <sup>235</sup> ,<br>2019, Mexico<br><br>BMI – Included,<br>review                                  | Female,<br>Retrospective<br>analysis,<br>prospectively<br>collected data<br>(n=228) mean<br>age:46                                  | Diagnosed:2014-<br>2018 follow Up:<br>Median 68<br>months   | Breast cancer with brain<br>metastasis                                                                                                                | Measured                         | Overall survival                                                            | >=25 vs <25 kg/m <sup>2</sup>          | 0.80(0.61-1.10)            | Age, other factors,<br>tumor subtype                                                                                                 |
| Fang Q, 2019 <sup>236</sup> ,<br>China<br><br>BMI – Excluded<br>(mortality)<br>Included, review<br>(recurrence) | Female,<br>Retrospective<br>Cohort of Cancer<br>Survivors (n=409)<br>Pre/peri-<br>menopausal<br>53.1%. Post-<br>menopausal<br>46.9% | Diagnosed:2009-<br>2015 follow Up:<br>Median 43.2<br>months | AJCC stage II 65.5%, III<br>34.5%. ER negative<br>44.5%, positive 55.5%.<br>PR negative 63.1%,<br>positive 36.9%.                                     | Medical records                  | Overall survival<br>(n=59.0)                                                | >=25 vs <25 kg/m <sup>2</sup>          | 1.23(0.70-2.17)<br>P=0.012 |                                                                                                                                      |
|                                                                                                                 |                                                                                                                                     |                                                             |                                                                                                                                                       |                                  | Disease free<br>survival (n=107.0)                                          |                                        | 1.69(1.13-2.53)<br>P=0.011 | Age, other factors,<br>tumor subtype, BMI<br>change, clinical stage,<br>ER status, PCR status,<br>PR status, stage, tumor<br>subtype |
| Fasching PA,<br>2019 <sup>237</sup> , Germany<br><br>BMI – Included,<br>review                                  | Female,<br>Retrospective<br>Cohort of Cancer<br>Survivors<br>(n=3140)                                                               |                                                             | Early HER2-negative and<br>hormone receptor-<br>positive breast cancer;<br>AJCC stage I 1083, II<br>1213, III 391<br>Chemotherapy yes 677,<br>no 2730 | Registry database                | Disease free<br>survival (n=586)                                            | >=30 vs <25 kg/m <sup>2</sup>          | 0.98(0.79-1.20)            | Age, ki-67 expression,<br>tumor stage                                                                                                |
| Kim JY, 2019 <sup>129</sup> ,<br>Korea                                                                          | Female,<br>Retrospective<br>Cohort of Cancer<br>Survivors                                                                           | Diagnosed:2003-<br>2011 (treatment)<br>follow Up:           | Breast cancer stage I<br>44.8%, II 42.4%, III<br>12.7%; ER positive<br>72.2%, PR positive                                                             | Medical records                  | All-cause<br>mortality (n=256)                                              | >=25.1 vs 18.5-23<br>kg/m <sup>2</sup> | 1.14(0.85-1.52)            | Age, chemotherapy,<br>radiotherapy, surgery,<br>tumor stage, tumor type                                                              |
|                                                                                                                 |                                                                                                                                     |                                                             |                                                                                                                                                       |                                  | Recurrence<br>(n=256)                                                       |                                        | 1.08(0.85-1.37)            |                                                                                                                                      |

|                                                                            |                                                                                                        |                                                          |                                                                                                                                                                                              |          |                                            |                                       |                             |                                               |
|----------------------------------------------------------------------------|--------------------------------------------------------------------------------------------------------|----------------------------------------------------------|----------------------------------------------------------------------------------------------------------------------------------------------------------------------------------------------|----------|--------------------------------------------|---------------------------------------|-----------------------------|-----------------------------------------------|
| BMI – Included, meta-analysis (mortality)<br>Included, review (recurrence) | (n=6405) mean age:48.6<br>Post-menopausal 37.2%                                                        | Median 5.45 years                                        | 67.2%, HER2 positive 19.6% Curative surgery followed by adjuvant chemotherapy 72.3%, radiotherapy 75.5%, hormone therapy 98.8%, targeted therapy 46.7%                                       |          | Age <40 All-cause mortality                |                                       | 1.25(0.65-2.43)             |                                               |
|                                                                            |                                                                                                        |                                                          |                                                                                                                                                                                              |          | Age 40-49 All-cause mortality              |                                       | 1.23(0.70-2.15)             |                                               |
|                                                                            |                                                                                                        |                                                          |                                                                                                                                                                                              |          | Age 50-59 years All-cause mortality        |                                       | 0.99(0.56-1.79)             |                                               |
|                                                                            |                                                                                                        |                                                          |                                                                                                                                                                                              |          | Age >60 All-cause mortality                |                                       | 1.05(0.58-1.93)             |                                               |
|                                                                            |                                                                                                        |                                                          |                                                                                                                                                                                              |          | Age <40 Recurrence                         |                                       | 1.07(0.63-1.80)             |                                               |
|                                                                            |                                                                                                        |                                                          |                                                                                                                                                                                              |          | Age 40-49 Recurrence                       |                                       | 1.20(0.78-1.82)             |                                               |
|                                                                            |                                                                                                        |                                                          |                                                                                                                                                                                              |          | Age 50-59 years Recurrence                 |                                       | 0.76(0.46-1.27)             |                                               |
|                                                                            |                                                                                                        |                                                          |                                                                                                                                                                                              |          | Age >=60 Recurrence                        |                                       | 1.33(0.71-2.48)             |                                               |
| Kim JY, 2019 <sup>239</sup> , Korea<br><br>BMI – Included, review          | Female, Retrospective Cohort of Cancer Survivors (n=5919)<br>Pre-menopause 56.9%, post-menopause 41.6% | Diagnosed:200-2015 (surgery) follow Up: Median 71 months | Stage I 28.3%, II 58.2%, III 13.1%, unknown 0.4%. ER negative 33.3%, positive 66.6%. PR negative 45.9%, positive 54.0%. Adjuvant chemotherapy 68.8%, post-operation radiation therapy 67.2%. | Measured | Overall survival (n=210)                   | >=25 vs 18.50-24.99 kg/m <sup>2</sup> | 2.77(1.09–7.04)<br>P= 0.032 | Menopausal status, tumor stage, tumor subtype |
|                                                                            |                                                                                                        |                                                          |                                                                                                                                                                                              |          | Relapse-free survival (n=764)              |                                       | 1.16(0.99-1.36)<br>P=0.074  |                                               |
|                                                                            |                                                                                                        |                                                          |                                                                                                                                                                                              |          | Premenopausal Relapse-free survival        |                                       | 1.92(1.33-2.78)<br>P=0.017  |                                               |
|                                                                            |                                                                                                        |                                                          |                                                                                                                                                                                              |          | Postmenopausal Relapse-free survival       |                                       | 1.35(1.08-1.69)<br>P=0.009  | Tumor stage, tumor subtype                    |
|                                                                            |                                                                                                        |                                                          |                                                                                                                                                                                              |          | HR+/HER2- Overall survival                 |                                       | 1.55(0.98-2.47)<br>P=0.063  |                                               |
|                                                                            |                                                                                                        |                                                          |                                                                                                                                                                                              |          | HR+/HER2- Relapse-free survival            |                                       | 1.80(1.11-2.91)<br>P=0.017  |                                               |
|                                                                            |                                                                                                        |                                                          |                                                                                                                                                                                              |          | HR+/HER2+ Relapse-free survival            |                                       | 4.54(2.05-10.03)<br>P=0.017 |                                               |
|                                                                            |                                                                                                        |                                                          |                                                                                                                                                                                              |          | Pre-menopausal, HR+/HER2- Overall survival |                                       | 2.99(1.17-7.63)<br>P=0.011  |                                               |
|                                                                            |                                                                                                        |                                                          |                                                                                                                                                                                              |          | Post-menopausal HR+/HER- Overall survival  |                                       | 2.09(1.10-3.97)<br>P=0.024  |                                               |
|                                                                            |                                                                                                        |                                                          |                                                                                                                                                                                              |          | Pre-menopausal, HR+/HER2-                  |                                       | 1.90(1.16-3.12)<br>P=0.011  | Tumor stage, tumor subtype                    |

|                                               |                                                                                          |                                                   |                                                                                                                                                                                                                                                                                                                       |                 |                                                |                               |                                                                                                                                      |  |
|-----------------------------------------------|------------------------------------------------------------------------------------------|---------------------------------------------------|-----------------------------------------------------------------------------------------------------------------------------------------------------------------------------------------------------------------------------------------------------------------------------------------------------------------------|-----------------|------------------------------------------------|-------------------------------|--------------------------------------------------------------------------------------------------------------------------------------|--|
|                                               |                                                                                          |                                                   |                                                                                                                                                                                                                                                                                                                       |                 | Relapse-free survival                          |                               |                                                                                                                                      |  |
|                                               |                                                                                          |                                                   |                                                                                                                                                                                                                                                                                                                       |                 | Post-menopausal HR+/HER- Relapse-free survival |                               | 1.53(1.10-2.12)<br>P=0.012                                                                                                           |  |
| Kus T, 2019 <sup>373</sup> , Turkey           | Female, Retrospective Cohort of Cancer Survivors (n=424) mean age:48.2                   | Diagnosed:2005-2016 follow Up: Median 6.7 years   | Breast cancer stage I to III 36% Surgery completed, neoadjuvant or adjuvant chemotherapy                                                                                                                                                                                                                              | Medical records | Recurrence                                     | >=30 vs <30 kg/m <sup>2</sup> | 0.86(0.60-1.40)                                                                                                                      |  |
| BMI - Excluded                                |                                                                                          |                                                   |                                                                                                                                                                                                                                                                                                                       |                 | Recurrence rate after 5 y                      |                               | 1.65(0.70-4.10)                                                                                                                      |  |
| Lee JW, 2019 <sup>374</sup> , Korea           | Female, Retrospective Cohort of Cancer Survivors (n=336) mean age:51,                    | Diagnosed:2012-2016 Follow Up: Median 53.3 months | Invasive breast cancer T stage T1 45.8%, T2 43.8%, T3 6.8%, T4 3.6%; N stage N0 54.3%, N1 20.5%, N2 8.6%, N3 6.5%; histologic grade 1 24.7%, 2 50.3%, 3 25.0%, triple-negative 12.2%, PR-positive 61.9%, HER2 positive 50.3%, Curative surgery completed; neoadjuvant chemotherapy 13.7%, adjuvant chemotherapy 97.8% | Medical records | Recurrence free survival (n=36)                | >=23 vs <23 kg/m <sup>2</sup> | 1.13(0.58-2.18)<br>P=0.717                                                                                                           |  |
| BMI - Excluded                                |                                                                                          |                                                   |                                                                                                                                                                                                                                                                                                                       |                 |                                                |                               |                                                                                                                                      |  |
| Omarini C, 2019 <sup>375</sup> , Italy        | Female, Retrospective Cohort of Cancer Survivors (n=407) mean age:50, Pre-menopausal 52% | Diagnosed:2005-2017 (treatment)                   | Breast cancer stage I 1%, II 73%, III 26%; grade 1-2 11%, 3 89%; HR-positive 38%, HER2-positive 36%, TN 26% Mastectomy 51%, lumpectomy 49%; neoadjuvant chemotherapy 100%                                                                                                                                             | Medical records | Mortality                                      | Obesity                       | Neither BMI classes nor body composition parameters distribution significantly influenced overall survival and relapse-free survival |  |
| BMI - Excluded                                |                                                                                          |                                                   |                                                                                                                                                                                                                                                                                                                       |                 | Recurrence free survival                       |                               |                                                                                                                                      |  |
| Tryggvadottir H, 2019 <sup>240</sup> , Sweden | Female, Prospective Cohort of Cancer Survivors (n=1178) mean age:61.5                    | Diagnosed:2002-2014 follow Up: Maximum 13 years   | Breast cancer. Histological grade I 24.7%, II 47.7%, III 27.6%. ER + 88.5%. PR+ 71.8%. Chemotherapy 28.2%. Radiotherapy 61.2%                                                                                                                                                                                         | Measured        | Recurrence (n=165)                             | >=25 vs <25 kg/m <sup>2</sup> | P=0.013                                                                                                                              |  |
| BMI - Excluded                                |                                                                                          |                                                   |                                                                                                                                                                                                                                                                                                                       |                 |                                                |                               |                                                                                                                                      |  |

|                                                                                                                     |                                                           |                                                 |                                      |                 |                                                          |                                    |                             |                                                                                                                                                                  |
|---------------------------------------------------------------------------------------------------------------------|-----------------------------------------------------------|-------------------------------------------------|--------------------------------------|-----------------|----------------------------------------------------------|------------------------------------|-----------------------------|------------------------------------------------------------------------------------------------------------------------------------------------------------------|
| Vernaci G, 2019 <sup>30</sup> , Italy<br><br>BMI – Included, meta-analysis                                          | Female, Retrospective Cohort of Cancer Survivors (n=992)  | Diagnosed:200-2007 follow Up: Median 152 months | Early breast cancer. Stage I-III     | Measured        | Overall survival (n=212)                                 | >=30 vs <25 kg/m <sup>2</sup>      | 0.96(0.65-1.41)<br>P=0.820  | Age, grade, menopausal status, stage                                                                                                                             |
|                                                                                                                     |                                                           | Diagnosed:2000-2007 follow Up: Median 39 months |                                      |                 | Invasive disease free survival (n=358)                   |                                    | 1.16(0.87-1.55)<br>P=0.307  |                                                                                                                                                                  |
|                                                                                                                     |                                                           |                                                 |                                      |                 | HR+ Invasive disease free survival                       |                                    | 1.72(1.30-2.28)<br>P=<0.001 |                                                                                                                                                                  |
|                                                                                                                     |                                                           |                                                 |                                      |                 | HR- Invasive disease free survival (n=10)                |                                    | P =0.662                    |                                                                                                                                                                  |
|                                                                                                                     |                                                           |                                                 |                                      |                 | Late invasive disease free survival (n=86.0)             |                                    | 2.81(1.64-4.83)<br>P=<0.001 |                                                                                                                                                                  |
|                                                                                                                     |                                                           |                                                 |                                      |                 | HR+ Late invasive disease free survival                  |                                    | 3.86(2.25-6.62)<br>P=<0.001 |                                                                                                                                                                  |
| Wang K, 2019 <sup>241</sup> , Western China Clinical Cooperation Group (WCCCG), China<br><br>BMI – Included, review | Female, Retrospective Cohort of Cancer Survivors (n=1288) | Diagnosed:2005-2015 follow Up: Maximum 5 years  | Nonmetastatic invasive breast cancer | Medical records | Disease free survival                                    | ≥25 vs 18.5-24.9 kg/m <sup>2</sup> | 1.40(1.05-1.88)<br>P=0.02   | Age at diagnosis, axillary node dissection, chemotherapy, endocrine therapy, ER status, HER2 status, nuclear grade, PR status, radiotherapy, surgery, tumor size |
|                                                                                                                     |                                                           |                                                 |                                      |                 | Premenopausal Disease free survival                      |                                    | 1.34(0.87-2.06)<br>P=0.18   |                                                                                                                                                                  |
|                                                                                                                     |                                                           |                                                 |                                      |                 | Postmenopausal Disease free survival                     |                                    | 1.63(1.06-2.50)<br>P=0.03   |                                                                                                                                                                  |
|                                                                                                                     |                                                           |                                                 |                                      |                 | Luminal-like Disease free survival                       |                                    | 0.93(0.52-1.69)<br>P=0.82   |                                                                                                                                                                  |
|                                                                                                                     |                                                           |                                                 |                                      |                 | HER2/luminal-like Disease free survival                  |                                    | 2.14(1.23-3.75)<br>P=0.01   |                                                                                                                                                                  |
|                                                                                                                     |                                                           |                                                 |                                      |                 | HER2-like Disease free survival                          |                                    | 1.25(0.65-2.39)<br>P=0.51   |                                                                                                                                                                  |
|                                                                                                                     |                                                           |                                                 |                                      |                 | TNBC Disease free survival                               |                                    | 2.33(1.06-5.12)<br>P=0.04   |                                                                                                                                                                  |
|                                                                                                                     |                                                           |                                                 |                                      |                 | Axillary lymph nodes metastasis no Disease free survival |                                    | 2.15(1.21-3.79)<br>P=0.01   |                                                                                                                                                                  |
|                                                                                                                     |                                                           |                                                 |                                      |                 | Axillary lymph nodes metastasis                          |                                    | 1.30(0.91-1.84)<br>P=0.15   |                                                                                                                                                                  |

|                                                                                                                                                 |                                                                                                                  |                                                                              |                                                                                                                                                                                                  |                             |                                          |                               |                            |                                                                                                 |
|-------------------------------------------------------------------------------------------------------------------------------------------------|------------------------------------------------------------------------------------------------------------------|------------------------------------------------------------------------------|--------------------------------------------------------------------------------------------------------------------------------------------------------------------------------------------------|-----------------------------|------------------------------------------|-------------------------------|----------------------------|-------------------------------------------------------------------------------------------------|
|                                                                                                                                                 |                                                                                                                  |                                                                              |                                                                                                                                                                                                  |                             | yes Disease free survival                |                               |                            |                                                                                                 |
|                                                                                                                                                 |                                                                                                                  |                                                                              |                                                                                                                                                                                                  |                             | Nuclear grade I/II Disease free survival |                               | 1.31(0.89-1.92)<br>P=0.17  |                                                                                                 |
|                                                                                                                                                 |                                                                                                                  |                                                                              |                                                                                                                                                                                                  |                             | Nuclear grade III Disease free survival  |                               | 1.48(0.90-2.42)<br>P=0.12  |                                                                                                 |
|                                                                                                                                                 |                                                                                                                  |                                                                              |                                                                                                                                                                                                  |                             | Chemotherapy - no Disease free survival  |                               | 1.48(1.09-2.02)<br>P=0.01  |                                                                                                 |
|                                                                                                                                                 |                                                                                                                  |                                                                              |                                                                                                                                                                                                  |                             | Chemotherapy - yes Disease free survival |                               | 1.03(0.32-3.28)<br>P=0.04  |                                                                                                 |
| Wang X, 2019 <sup>242</sup> , Hebei Medical University China<br><br>BMI – Included, review                                                      | Female, Retrospective Cohort of Cancer Survivors (n=3380) mean age:50                                            |                                                                              | 44.5% lymphatic metastasis positive<br>55.5% lymphatic metastasis negative                                                                                                                       | Medical records             | Overall survival                         | >=25 vs <25                   | 1.33(1.06-1.66)<br>P=0.012 | ER status, grade, HER-2/neu, ki-67 expression, lymph node involvement, PR status, size of tumor |
|                                                                                                                                                 |                                                                                                                  |                                                                              |                                                                                                                                                                                                  |                             | Disease free survival                    |                               | 1.15(0.94-1.40)<br>P=0.173 |                                                                                                 |
|                                                                                                                                                 |                                                                                                                  |                                                                              |                                                                                                                                                                                                  |                             | >= 50 years Overall survival             |                               | 1.43(1.05-1.95)<br>P=0.025 |                                                                                                 |
|                                                                                                                                                 |                                                                                                                  |                                                                              |                                                                                                                                                                                                  |                             | >= 50 years Disease free survival        |                               | 1.17(0.88-1.56)<br>P=0.283 |                                                                                                 |
| Yao D, 2019 <sup>376</sup> , China<br><br>BMI - Excluded                                                                                        | Female, Retrospective Cohort of Cancer Survivors (n=825) mean age:52, Chinese                                    | Diagnosed:2009-2014 follow Up: Median 47.6 months                            | Breast cancer. Stage (n): I 184, II 397, III 244. ER positive (n): 496 PR positive (n): 418. Her-2-positive (n): 185. Type of surgery (n): Radical 617, Conservative 208. Chemotherapy (n): 742. | Medical records             | Overall survival                         | >=24 vs <24 kg/m <sup>2</sup> | 1.47(0.59-3.48)<br>P=0.276 |                                                                                                 |
|                                                                                                                                                 |                                                                                                                  |                                                                              |                                                                                                                                                                                                  |                             | Disease free survival                    |                               | 1.34(0.67-3.16)<br>P=0.165 |                                                                                                 |
| Zhang JY, 2019 <sup>131</sup> , Guangzhou Breast Cancer Study (GZBCS) Sun Yat-sen University (SYSU), China<br><br>BMI – Included, meta-analysis | Female, Prospective Cohort of Cancer Survivors (n=1551) mean age:48.25 Premenopausal 60.8%, postmenopausal 39.2% | Diagnosed:2008-2012 follow Up: Median 58.58 months<br>Loss to follow-up 8.3% | Stage I-II 79%, III-IV 21%. ER negative 28.5%, positive 71.5%. PR negative 35.2%, positive 64.8%. HER2 negative 68.3%, positive 31.7%                                                            | Questionnaire Self-reported | Progression-free survival (n=285.0)      | >=25 vs <22 kg/m <sup>2</sup> | 0.88(0.62-1.25)            | Age at diagnosis, education, ER status, HER2 status, menopausal status, stage                   |

|                                                                                        |                                                                                                                                                                                                       |                                                                                                                                                     |                                                                                                                                                                                                                         |                                  |                                                                      |                                      |                                  |                                                                                                                                                                                               |
|----------------------------------------------------------------------------------------|-------------------------------------------------------------------------------------------------------------------------------------------------------------------------------------------------------|-----------------------------------------------------------------------------------------------------------------------------------------------------|-------------------------------------------------------------------------------------------------------------------------------------------------------------------------------------------------------------------------|----------------------------------|----------------------------------------------------------------------|--------------------------------------|----------------------------------|-----------------------------------------------------------------------------------------------------------------------------------------------------------------------------------------------|
| Zhang M, 2019 <sup>377</sup> , China<br><br>BMI - Excluded                             | Female, Retrospective Cohort of Cancer Survivors (n=1536) Premenopausal (n=815) Postmenopausal (n=721) Chinese                                                                                        | Diagnosed:1971-2011 (treatment) follow Up: Maximum 5 years                                                                                          | Breast cancer. Type (n): 512 Bilateral, 1024 Unilateral. ER (n): 662 Negative, 874 Positive. PR (n): 665 Negative, 871 Positive. HER2 (n): 1216 Negative, 153 Positive. Not reported.                                   | Medical records                  | Unilateral breast cancer                                             | >=30.1 vs <25 kg/m <sup>2</sup>      | 0.88(0.73-1.07)<br>P=0.211       | Age at diagnosis, education, er status, HER2 status, menopausal status, stage                                                                                                                 |
|                                                                                        |                                                                                                                                                                                                       |                                                                                                                                                     |                                                                                                                                                                                                                         |                                  | Progression-free survival                                            |                                      | 0.92(0.79-1.06)<br>P=0.249       |                                                                                                                                                                                               |
|                                                                                        |                                                                                                                                                                                                       |                                                                                                                                                     |                                                                                                                                                                                                                         |                                  | Bilateral breast cancer Overall survival                             | >=30.1 vs <25 kg/m <sup>2</sup>      | 2.10(1.19-3.70)<br>P trend=0.005 | Age, diabetes, estrogen receptor status, grade, ki-67 expression, lymph node status, size of tumor                                                                                            |
|                                                                                        |                                                                                                                                                                                                       |                                                                                                                                                     |                                                                                                                                                                                                                         |                                  | Bilateral breast cancer Progression-free survival                    |                                      | 1.44(0.96-2.18)<br>P trend=0.007 |                                                                                                                                                                                               |
| Abubakar M, 2018 <sup>40</sup> , Sarawak Malaysia<br><br>BMI – Included, meta-analysis | Prospective cohort study (n=3012)<br><br>Premenopausal/≤50 years 29%<br>Postmenopausal/>50 years 71%<br><br>Mean age: 52 years<br><br>Chinese 48%<br>Malay 24%<br>Native 28%<br><br>Response rate 97% | Diagnosis: 2003-2006<br><br>Follow up = 24 months<br><br>579 deaths in 10 years<br><br>314 recurrence events in 5 years<br><br>5% loss to follow-up | Invasive breast cancer<br>Stage I 14%, II 42%, III 31%, IV 13%<br><br>Surgery: 88%<br><br>Chemotherapy: 76%<br><br>Radiotherapy: 74%<br><br>Tamoxifen: 47%<br>Aromatase inhibitor: 13%<br><br>No endocrine therapy: 40% | Measured 4 weeks after diagnosis | Self-reported<br>10-year all-cause mortality (n=71)<br><br>Luminal A | ≥30.1 vs 18.5-24.9 kg/m <sup>2</sup> | 1.38 (0.39 - 4.86)               | Age, ethnicity, Tumour stage, histological grade, Surgery, Systemic therapy, chemotherapy, radiotherapy, age at menarche, parity, breastfeeding, family history, age at first full-term birth |
|                                                                                        |                                                                                                                                                                                                       |                                                                                                                                                     |                                                                                                                                                                                                                         |                                  | 10-year all-cause mortality (n=140)<br><br>Luminal B                 | ≥30.1 vs 18.5-24.9 kg/m <sup>2</sup> | 1.12 ( 0.61 - 2.05 )             | Age, ethnicity, BMI, Tumour stage, histological grade, Surgery, Systemic                                                                                                                      |

|  |  |  |  |  |                                                                        |                                      |                       |                                                                                                                                                                                               |
|--|--|--|--|--|------------------------------------------------------------------------|--------------------------------------|-----------------------|-----------------------------------------------------------------------------------------------------------------------------------------------------------------------------------------------|
|  |  |  |  |  |                                                                        |                                      |                       | therapy,<br>chemotherapy,<br>radiotherapy,                                                                                                                                                    |
|  |  |  |  |  | 10-year all-cause mortality (n=81)<br>HER2+                            | ≥30.1 vs 18.5-24.9 kg/m <sup>2</sup> | 1.23 ( 0.52 - 2.9 )   |                                                                                                                                                                                               |
|  |  |  |  |  | 10-year all-cause mortality (n=146)<br>ER-/PR-/HER2-                   | ≥30.1 vs 18.5-24.9 kg/m <sup>2</sup> | 1.21 ( 0.63 - 2.32 )  |                                                                                                                                                                                               |
|  |  |  |  |  | Assessed at clinic<br>5-year breast cancer recurrence (n=39) Luminal A | ≥30.1 vs 18.5-24.9 kg/m <sup>2</sup> | 2.16 ( 0.34 - 13.78 ) | Age, ethnicity, Tumour stage, histological grade, Surgery, Systemic therapy, chemotherapy, radiotherapy, age at menarche, parity, breastfeeding, age at first full-term birth, family history |
|  |  |  |  |  | 5-year breast cancer recurrence (n=95) Luminal B                       | ≥30.1 vs 18.5-24.9 kg/m <sup>2</sup> | 1.28 ( 0.53 - 3.12 )  | Age, ethnicity, BMI, Tumour stage, histological grade, Surgery, Systemic therapy, chemotherapy, radiotherapy,                                                                                 |
|  |  |  |  |  | 5-year breast cancer recurrence (n=54) HER2+                           | ≥30.1 vs 18.5-24.9 kg/m <sup>2</sup> | 1.41 ( 0.46 - 4.27 )  |                                                                                                                                                                                               |
|  |  |  |  |  | 5-year breast cancer recurrence (n=83)<br>ER-/PR-/HER2-                | ≥30.1 vs 18.5-24.9 kg/m <sup>2</sup> | 0.89 ( 0.35 - 2.25 )  |                                                                                                                                                                                               |



|                                                                                                                                                              |                                                                                |                                                             |                                                                                                                                                                                                                                                                                         |                                       |                                  |                                     |                                     |                                                                                                                                              |                    |                             |
|--------------------------------------------------------------------------------------------------------------------------------------------------------------|--------------------------------------------------------------------------------|-------------------------------------------------------------|-----------------------------------------------------------------------------------------------------------------------------------------------------------------------------------------------------------------------------------------------------------------------------------------|---------------------------------------|----------------------------------|-------------------------------------|-------------------------------------|----------------------------------------------------------------------------------------------------------------------------------------------|--------------------|-----------------------------|
| Bouvard B, 2018 <sup>243</sup> , France<br><br>BMI – Included, review                                                                                        | Female, Prospective Cohort of Cancer Survivors (n=450) mean age:60.7           | Diagnosed:2004-2006 follow Up: Median 5.2 years             | ER+ breast cancer. Stage I 23.1%, II 50.2%, III 22.0%, missing 4.7%. PR positive 81.8%, negative 16.9% missing 1.3%. Previous chemotherapy 55.8%, anthracyclines 85.7%, docetaxel 32.7%, other type 15.9%, no 44.2%. Previous radiotherapy yes 93.1%. Previous tamoxifen therapy 40.4%. | Measured                              | All-cause mortality (n=67)       | >25 vs <=25kg/m <sup>2</sup>        | 0.98(0.93-1.03)<br>P=0.37           | Age, bisphosphonate, nodal involvement, PR status, tumor size, vitamin d                                                                     |                    |                             |
|                                                                                                                                                              |                                                                                |                                                             |                                                                                                                                                                                                                                                                                         |                                       | Cancer specific mortality (n=41) |                                     | 0.99(0.93-1.05)<br>P=0.69           |                                                                                                                                              |                    |                             |
|                                                                                                                                                              |                                                                                |                                                             |                                                                                                                                                                                                                                                                                         |                                       | Breast cancer relapse (n=65)     |                                     | 1.02(0.98-1.07)<br>P=0.34           |                                                                                                                                              |                    |                             |
| Caan, 2018 <sup>53</sup> , Kaiser Permanente of Northern California (KPNC) and Dana Farber Cancer Institute (DFCI), USA<br><br>BMI – Included, meta-analysis | Retrospective cohort study (n=324) mean age: 54<br><br>Pre- and postmenopausal | KPNC:2005-2013<br>DFCI: 2000-2012<br><br>Follow up= 6 years | Invasive breast cancer<br>Stage II 60.2%; III 39.8%<br><br>ER- 27.0%,<br>ER+ 73.0%<br><br>HER2- 73.3%,<br>HER2+ 20.9%<br><br>Chemotherapy: 86.7%                                                                                                                                        | Measured                              | Total mortality (n=619)          | ≥ 30 vs 18.5-24.9 kg/m <sup>2</sup> | 1.10 ( 0.89 - 1.36 )                | Age at diagnosis, race, stage, grade, surgery type, chemotherapy, smoking, estrogen receptor level, human epidermal growth factor receptor 2 |                    |                             |
|                                                                                                                                                              |                                                                                |                                                             |                                                                                                                                                                                                                                                                                         |                                       |                                  | Per 6.3 kg/m <sup>2</sup>           | 1.03 (0.94 - 1.13)                  |                                                                                                                                              |                    |                             |
|                                                                                                                                                              |                                                                                |                                                             |                                                                                                                                                                                                                                                                                         |                                       |                                  | Total mortality (n=619)             | ≥ 30 vs 18.5-24.9 kg/m <sup>2</sup> |                                                                                                                                              | 1.22 (0.96 - 1.55) | Above factors + muscle area |
|                                                                                                                                                              |                                                                                |                                                             |                                                                                                                                                                                                                                                                                         |                                       |                                  | Total mortality (n=619)             | Per 6.3 kg/m <sup>2</sup>           |                                                                                                                                              | 1.10 (0.98-1.22)   |                             |
| Cho, 2018 <sup>152</sup> , Korea,<br><br>BMI – Excluded (mortality)                                                                                          | Retrospective cohort study (n= 5668 ) age range: 22-90 patients                | Treatment: 1996-2013<br>Follow up= 168 months               | Invasive breast cancer<br>HR+/HER2- 59.8%<br>HR+/HER2+ 899 cases<br>Triple Negative 793 cases                                                                                                                                                                                           | From records At admission for surgery | Overall survival                 | ≥25 vs <25 kg/m <sup>2</sup>        | 1.356 ( 1.038 - 1.773 )             | Age, subtype, pT, pN, Hyperlipidemia, Surgery, Diabetes, Hypertension, Surgery                                                               |                    |                             |

|                               |                                                                                               |  |                                                                                                             |  |                                       |                              |                         |  |
|-------------------------------|-----------------------------------------------------------------------------------------------|--|-------------------------------------------------------------------------------------------------------------|--|---------------------------------------|------------------------------|-------------------------|--|
| Included, review (recurrence) | underwent curative surgery for breast cancer (C50) from 1996 to 2013. Pre- and postmenopausal |  | HR-/HER+ 653 cases, Unknown 372 cases Surgery (BCS+RT) 3687 cases Mastectomy 1981 cases Chemotherapy: 69.2% |  |                                       |                              |                         |  |
|                               |                                                                                               |  |                                                                                                             |  | Overall survival HR+/HER2-            | ≥25 vs <25 kg/m <sup>2</sup> | 1.836 ( 1.205 - 2.8 )   |  |
|                               |                                                                                               |  |                                                                                                             |  | Overall survival HR+/HER2+            | ≥25 vs <25 kg/m <sup>2</sup> | 0.882 ( 0.326 - 2.39 )  |  |
|                               |                                                                                               |  |                                                                                                             |  | Overall survival Triple-negative      | ≥25 vs <25 kg/m <sup>2</sup> | 1.408 ( 0.902 - 2.197 ) |  |
|                               |                                                                                               |  |                                                                                                             |  | Overall survival HR-/HER2+            | ≥25 vs <25 kg/m <sup>2</sup> | 0.83 ( 0.418 - 1.647 )  |  |
|                               |                                                                                               |  |                                                                                                             |  | Disease-free survival                 | ≥25 vs <25 kg/m <sup>2</sup> | 1.248 ( 1.038 - 1.502 ) |  |
|                               |                                                                                               |  |                                                                                                             |  | Disease-free survival HR+/HER2-       | ≥25 vs <25 kg/m <sup>2</sup> | 1.416 ( 1.08 - 1.856 )  |  |
|                               |                                                                                               |  |                                                                                                             |  | Disease-free survival HR+/HER2+       | ≥25 vs <25 kg/m <sup>2</sup> | 1.11 ( 0.593 - 2.041 )  |  |
|                               |                                                                                               |  |                                                                                                             |  | Disease-free survival Triple-negative | ≥25 vs <25 kg/m <sup>2</sup> | 1.149 ( 0.811 - 1.627 ) |  |
|                               |                                                                                               |  |                                                                                                             |  | Disease-free survival HR-/HER2+       | ≥25 vs <25 kg/m <sup>2</sup> | 0.833 ( 0.494 - 1.404 ) |  |
|                               |                                                                                               |  |                                                                                                             |  | Overall survival With Chemotherapy    | ≥25 vs <25 kg/m <sup>2</sup> | 1.285 (0.959-1.723)     |  |
|                               |                                                                                               |  |                                                                                                             |  | Overall survival Without Chemotherapy | ≥25 vs <25 kg/m <sup>2</sup> | 1.507 (0.846-2.685)     |  |

|                                                                    |                                                                                      |                                                                                            |                                                                                                                                                                                                     |                                                        |                                                  |                              |                                                                                                             |                                                                                                                                          |
|--------------------------------------------------------------------|--------------------------------------------------------------------------------------|--------------------------------------------------------------------------------------------|-----------------------------------------------------------------------------------------------------------------------------------------------------------------------------------------------------|--------------------------------------------------------|--------------------------------------------------|------------------------------|-------------------------------------------------------------------------------------------------------------|------------------------------------------------------------------------------------------------------------------------------------------|
|                                                                    |                                                                                      |                                                                                            |                                                                                                                                                                                                     |                                                        | Disease-free survival<br>With<br>Chemotherapy    | ≥25 vs <25 kg/m <sup>2</sup> | 1.212 (0.990-1.485)                                                                                         |                                                                                                                                          |
|                                                                    |                                                                                      |                                                                                            |                                                                                                                                                                                                     |                                                        | Disease-free survival<br>Without<br>Chemotherapy | ≥25 vs <25 kg/m <sup>2</sup> | 1.036 (0.680-1.579)                                                                                         |                                                                                                                                          |
| Deluche, 2018 <sup>158</sup> ,<br>France,<br><br>BMI - Excluded    | Retrospective<br>cohort study (n=<br>119 ) mean<br>age:56 Pre- and<br>postmenopausal | Diagnosis year:<br>March 2007 to<br>June 2016<br>Follow up= 52.4<br>months                 | Early stage breast<br>cancer<br>Tumor size < 2 cm<br>19.0%<br>Tumor size ≥ 2 cm<br>81.0%<br>Neoadjuvant<br>chemotherapy 55%<br>Adjuvant chemotherapy<br>alone 54%<br>Adjuvant radiotherapy<br>90.0% | Measured<br>at 1 <sup>st</sup> clinical<br>appointment | Overall<br>survival(n=22)                        | ≥25 vs <25 kg/m <sup>2</sup> | 0.7 ( 0.3 - 1.7 )<br><br>P =0.4                                                                             | Unadjusted                                                                                                                               |
|                                                                    |                                                                                      |                                                                                            |                                                                                                                                                                                                     |                                                        | Disease-free<br>survival(n=25)                   | ≥25 vs <25 kg/m <sup>2</sup> | 2.8 ( 0.1 - 1.1 )<br><br>P =0.09                                                                            | sarcopenia,<br>subcutaneous adipose<br>tissue, visceral adipose<br>tissue index, muscle fat<br>infiltration index,<br>VAT/SAT ratio      |
| Desmedt C,<br>2018 <sup>378</sup> , Brussels<br><br>BMI - Excluded | Female,<br>Retrospective<br>Cohort of Cancer<br>Survivors<br>(n=1834)                | Diagnosed:<br>between January<br>2008 and<br>December 2010<br>follow Up:<br>Median 7 years | Tumor size, cm all no.<br>(%): Ketorolac series:<br><2cm= 466 (56.4);<br>>=2cm=360 (43.6%);<br>Diclofenac series:<br><2cm: 634 (63.5),                                                              | At the time of<br>primary surgery                      | Distant<br>metastases<br>(n=73)                  |                              | Ketorolac/Diclofenac<br>use or not was not<br>associated with<br>distant metastases<br>within BMI subgroups | Age, tumor size, nodal<br>status, grade, estrogen<br>receptor status, human<br>epidermal growth<br>factor receptor 2<br>status, adjuvant |

|                                                                  |                                                                                 |                                                                                                                                                                                                                                                                                                                                                         |                                                                                                                                                                                                                                                         |                                                                                                                                  |                                              |                                 |                    |                                                                                                                                                                                                                                                                                                                                     |
|------------------------------------------------------------------|---------------------------------------------------------------------------------|---------------------------------------------------------------------------------------------------------------------------------------------------------------------------------------------------------------------------------------------------------------------------------------------------------------------------------------------------------|---------------------------------------------------------------------------------------------------------------------------------------------------------------------------------------------------------------------------------------------------------|----------------------------------------------------------------------------------------------------------------------------------|----------------------------------------------|---------------------------------|--------------------|-------------------------------------------------------------------------------------------------------------------------------------------------------------------------------------------------------------------------------------------------------------------------------------------------------------------------------------|
|                                                                  |                                                                                 | <p>,&gt;In the ketorolac cohort, 73 distant metastases occurred as the first event, of which 48 were in the high-BMI group</p> <p>&gt;In the diclofenac cohort, 79 distant metastases occurred as the first event, of which 41 were in the high-BMI group</p> <p>**ketorolac (n=529 with, n=298 without) or diclofenac (n=787 with, n=220 without).</p> | <p>&gt;=2cm: 364 (36.5)</p> <p>Ketorolac series: Grade 1=129 (16.9); Grade 2=281 (36.8); Grade 3=354(46.3)</p> <p>Diclofenac series: Grade 1=192 (19.1); Grade 2=518(51.5); Grade 3 295 (29.4)</p>                                                      |                                                                                                                                  |                                              |                                 |                    | chemotherapy, adjuvant endocrine therapy                                                                                                                                                                                                                                                                                            |
| Elwood JM, 2018 <sup>65</sup> , New Zealand cohort, New Zealand, | Prospective cohort of cancer survivors (n=1049 )<br><br>Pre-and post-menopausal | 2000-2014<br><br>Follow up= 4.1 years                                                                                                                                                                                                                                                                                                                   | <p>Invasive breast cancer</p> <p>Stage I 14%,<br/>II 51.2%, III 29.5%, IV 5.3%</p> <p>ER+/PR+ 49.1%,<br/>ER+/PR- 20.6%,<br/>ER-/PR+ 2.1%,<br/>ER-/PR- 25.7%,<br/>missing/unknown 2.5%</p> <p>HER-2 + 26.1%,<br/>equivocal 2.6%,<br/>negative 52.8%,</p> | From records at first clinic after diagnosis and before primary treatment or after primary surgery but before systemic treatment | Overall mortality (n=463) whole study period | ≥ 35 vs 21-25 kg/m <sup>2</sup> | 1.03 (0.63 - 1.67) | BMI, ethnicity, menopausal status, age, social class, social deprivation, urban-rural status, mode of diagnosis (screening vs symptomatic), year of diagnosis, stage, grade, histology , hormone receptor status, local treatment, systemic treatment (chemotherapy, hormonal therapy and biological treatment), treatment facility |

|  |  |  |                                                                                                                                                                                                                                                                                                                                                                                                                                                   |  |                                                                            |                                 |                      |                                           |
|--|--|--|---------------------------------------------------------------------------------------------------------------------------------------------------------------------------------------------------------------------------------------------------------------------------------------------------------------------------------------------------------------------------------------------------------------------------------------------------|--|----------------------------------------------------------------------------|---------------------------------|----------------------|-------------------------------------------|
|  |  |  | missing/unknown<br>18.5%<br><br>Chemotherapy alone<br>32.2%, chemotherapy<br>and hormonal therapy<br>67.8%<br><br>Breast cancer<br>conserving surgery with<br>radiotherapy 43%, with<br>no radiotherapy 4.3%,<br>mastectomy with<br>radiotherapy 36.1%,<br>with no radiotherapy<br>12.4%,<br><br>no primary surgery<br>4.2%<br><br>Total mastectomy<br>48.5%,<br><br>total with radiotherapy<br>79.1%,<br><br>total without<br>radiotherapy 16.7% |  |                                                                            |                                 |                      | (public vs private),<br>comorbidity index |
|  |  |  |                                                                                                                                                                                                                                                                                                                                                                                                                                                   |  | Total mortality<br>(n=462) whole<br>study period                           | Per 1 kg/m <sup>2</sup>         | 1.00 (0.97 - 1.03)   |                                           |
|  |  |  |                                                                                                                                                                                                                                                                                                                                                                                                                                                   |  | Breast cancer-<br>specific<br>mortality(n=361)<br>whole study<br>period    | ≥ 35 vs 21-25 kg/m <sup>2</sup> | 0.96 ( 0.56 - 1.67 ) |                                           |
|  |  |  |                                                                                                                                                                                                                                                                                                                                                                                                                                                   |  | Breast cancer-<br>specific<br>mortality(n=317)<br>normal axillary<br>nodes | Per 1 kg/m <sup>2</sup>         | 0.99 ( 0.96 - 1.02 ) |                                           |

|                                                                             |                                                                                                                           |                                                           |                                                                                                                                                                                                                                                                                                                 |                           |                                                           |                                 |                               |                                                                                                                                   |                                                                                                             |
|-----------------------------------------------------------------------------|---------------------------------------------------------------------------------------------------------------------------|-----------------------------------------------------------|-----------------------------------------------------------------------------------------------------------------------------------------------------------------------------------------------------------------------------------------------------------------------------------------------------------------|---------------------------|-----------------------------------------------------------|---------------------------------|-------------------------------|-----------------------------------------------------------------------------------------------------------------------------------|-------------------------------------------------------------------------------------------------------------|
|                                                                             |                                                                                                                           |                                                           |                                                                                                                                                                                                                                                                                                                 |                           | Non-breast-cancer-related death(n=171) whole study period | ≥ 35 vs 21-25 kg/m <sup>2</sup> | 1.42 ( 0.4 - 5.01 )           |                                                                                                                                   |                                                                                                             |
|                                                                             |                                                                                                                           |                                                           |                                                                                                                                                                                                                                                                                                                 |                           | Breast cancer recurrence(n=107 ) whole study period       | ≥ 35 vs 21-25 kg/m <sup>2</sup> | 1.17 ( 0.19 - 7.21 )          |                                                                                                                                   |                                                                                                             |
|                                                                             |                                                                                                                           |                                                           |                                                                                                                                                                                                                                                                                                                 |                           | Distant metastases (n=433) whole study period             | ≥ 35 vs 21-25 kg/m <sup>2</sup> | 1.33 ( 0.61 - 2.91 )          |                                                                                                                                   |                                                                                                             |
|                                                                             |                                                                                                                           |                                                           |                                                                                                                                                                                                                                                                                                                 |                           |                                                           | Per 1 kg/m <sup>2</sup>         | 0.98 ( 0.94 - 1.02 )          |                                                                                                                                   |                                                                                                             |
| Espelund U, 2018 <sup>379</sup> , Denmark<br><br>BMI - Excluded             | Female, Prospective Cohort of Cancer Survivors (n=301) mean age:55 Premenopausal 29%, postmenopausal 71%                  | Diagnosed:1993-1998 (surgery) follow Up: Median 68 months | ER positive 76%, negative 24%. PR positive 38%, negative 62%. Lumpectomy 52%, mastectomy 48%. No adjuvant therapy 53%, ovarian ablation 12%, tamoxifen 20%, chemotherapy 16%.                                                                                                                                   | Measured                  | Overall survival (n=107)                                  | Per 5 kg/m <sup>2</sup>         | 0.93(0.76-1.14) P trend=0.477 |                                                                                                                                   |                                                                                                             |
|                                                                             |                                                                                                                           |                                                           |                                                                                                                                                                                                                                                                                                                 |                           | Recurrence-free survival (n=105)                          |                                 | 0.87(0.72-1.04) P trend=0.129 |                                                                                                                                   |                                                                                                             |
| Flanagan MR, 2018 <sup>132</sup> , USA<br><br>BMI – Included, meta-analysis | Female, Nested Case-control Study (n=1310) , (n): 520 Pre or perimenopausal, 749 Postmenopausal, 41 Unknown. Mostly white | Diagnosed:1995-2013 (diagnosed with DCIS)                 | Breast cancer: Ductal carcinoma In situ. Histology of DCIS (n): 494 Mixed, 298 NOS, 171 Comedo, 158 Cribriform, 128 Solid, 61 other. Treatment for initial DCIS (n): 13 Biopsy only, 707 BCS with radiation, 308 without radiation, 282 Mastectomy. Adjuvant endocrine therapy (n): 863 No, 445 Yes, 2 Unknown. | Interview Medical records | Risk of second breast cancer event                        | Per 1 kg m <sup>2</sup>         | 1.03(1.01-1.10) P trend=0.007 | Adjuvant endocrine therapy, age, diagnosis year, grade, histology , menopausal status, other covariates, survival time, treatment |                                                                                                             |
|                                                                             |                                                                                                                           |                                                           |                                                                                                                                                                                                                                                                                                                 |                           | Invasive secondary breast cancer                          |                                 | 1.04(1.01-1.10) P trend=0.005 |                                                                                                                                   |                                                                                                             |
|                                                                             |                                                                                                                           |                                                           |                                                                                                                                                                                                                                                                                                                 |                           | In situ secondary breast cancer                           |                                 | 1.01(0.90-1.05) P trend=0.491 |                                                                                                                                   |                                                                                                             |
|                                                                             |                                                                                                                           |                                                           |                                                                                                                                                                                                                                                                                                                 |                           | Risk of second breast cancer event                        |                                 | >=30 vs <25 kg/m <sup>2</sup> |                                                                                                                                   | 1.60(1.20-2.20)                                                                                             |
|                                                                             |                                                                                                                           |                                                           |                                                                                                                                                                                                                                                                                                                 |                           | Invasive secondary breast cancer                          |                                 | 1.80(1.20-2.60)               |                                                                                                                                   | Adjuvant endocrine therapy, age, grade, histology , menopausal status, other covariates, radiation therapy, |
|                                                                             |                                                                                                                           |                                                           |                                                                                                                                                                                                                                                                                                                 |                           | In situ secondary breast cancer                           |                                 | 1.30(0.80-2.30)               |                                                                                                                                   |                                                                                                             |

|                                                                     |                                                                        |                                                             |                                                       |                   |                                                                           |                                       |                               |                                                                                                                                                                                                                     |
|---------------------------------------------------------------------|------------------------------------------------------------------------|-------------------------------------------------------------|-------------------------------------------------------|-------------------|---------------------------------------------------------------------------|---------------------------------------|-------------------------------|---------------------------------------------------------------------------------------------------------------------------------------------------------------------------------------------------------------------|
|                                                                     |                                                                        |                                                             |                                                       |                   | Without unilateral mastectomy Ipsilateral secondary breast cancer (n=173) | $\geq 30$ vs $< 25$ kg/m <sup>2</sup> | 1.10(0.70-1.80)               | surgery, survival time, year of diagnosis<br>Adjuvant endocrine therapy, age, diagnosis year, grade, histology, menopausal status, other covariates, survival time, treatment                                       |
|                                                                     |                                                                        |                                                             |                                                       |                   | Contralateral secondary breast cancer (n=270)                             | $\geq 30$ vs $< 25$ kg/m <sup>2</sup> | 2.20(1.40-3.30)               |                                                                                                                                                                                                                     |
|                                                                     |                                                                        |                                                             |                                                       |                   | Risk of second breast cancer event                                        | Per 1 kg/m <sup>2</sup>               | 1.03(1.00-1.04) P trend=0.028 |                                                                                                                                                                                                                     |
|                                                                     |                                                                        |                                                             |                                                       |                   | In situ secondary breast cancer                                           |                                       | 1.01(0.97-1.05) P trend=0.698 |                                                                                                                                                                                                                     |
|                                                                     |                                                                        |                                                             |                                                       |                   | Invasive secondary breast cancer                                          |                                       | 1.03(1.01-1.06) P trend=0.017 |                                                                                                                                                                                                                     |
|                                                                     |                                                                        |                                                             |                                                       |                   | Risk of second breast cancer event                                        | $\geq 30$ vs $< 25$ kg/m <sup>2</sup> | 1.50(1.10-2.10)               | Adjuvant endocrine therapy, age, grade, histology, menopausal status, other covariates, radiation therapy, surgery, survival time, year of diagnosis                                                                |
|                                                                     |                                                                        |                                                             |                                                       |                   | Invasive secondary breast cancer                                          | 1.60(1.10-2.30)                       |                               |                                                                                                                                                                                                                     |
|                                                                     |                                                                        |                                                             |                                                       |                   | In situ secondary breast cancer                                           | 1.30(0.80-2.30)                       |                               |                                                                                                                                                                                                                     |
|                                                                     |                                                                        |                                                             |                                                       |                   | Without unilateral mastectomy Ipsilateral secondary breast cancer (n=173) | $\geq 30$ vs $< 25$ kg/m <sup>2</sup> | 1.10(0.60-2.10)               |                                                                                                                                                                                                                     |
|                                                                     |                                                                        |                                                             |                                                       |                   | Contralateral breast cancer (n=270)                                       | $\geq 30$ vs $< 25$ kg/m <sup>2</sup> | 1.90(1.30-2.80)               |                                                                                                                                                                                                                     |
| Hwang KT, 2018 <sup>244</sup> , Korea<br><br>BMI – Included, review | Female, Retrospective Cohort of Cancer Survivors (n=967) mean age:54.3 | Diagnosed:1992-2016 (surgery) follow Up: Median 70.8 months | Operable primary invasive breast cancer. Stages I-III | Registry database | Overall survival (n=94)                                                   | $> 25$ vs $\leq 25$ kg/m <sup>2</sup> | 0.83(0.49-1.38)               | Age, chemotherapy, endocrine therapy, estrogen receptor status, HER2 status, herceptin use, histological grade, lymphovascular invasion, nodal status, operation type, other factors, progesterone receptor status, |
|                                                                     |                                                                        |                                                             |                                                       |                   | Age $> 50$ y Overall survival                                             |                                       | 0.98(0.54-1.79)               |                                                                                                                                                                                                                     |

|                                                                                                       |                                                                                  |                                                                                                                                                               |                                             |                                                                                        |                                                             |                                      |                                      |                                                                                                  |
|-------------------------------------------------------------------------------------------------------|----------------------------------------------------------------------------------|---------------------------------------------------------------------------------------------------------------------------------------------------------------|---------------------------------------------|----------------------------------------------------------------------------------------|-------------------------------------------------------------|--------------------------------------|--------------------------------------|--------------------------------------------------------------------------------------------------|
|                                                                                                       |                                                                                  |                                                                                                                                                               |                                             |                                                                                        |                                                             |                                      |                                      | radiotherapy, tumor size                                                                         |
| Kogawa, 2018 <sup>177</sup> ,<br>MD Anderson Cancer Centre (MDACC), USA<br><br>BMI – Included, review | Retrospective cohort study (n= 4029 ) age range:19-83<br>Pre- and postmenopausal | Diagnosis year: May 1, 1990, and April 30, 2013<br>Follow up= 3.95 years                                                                                      | Clinical stage: I 2.1%, II 56.2%, III 41.7% | Baseline BMI before neoadjuvant chemotherapy<br><br>BMI after neoadjuvant chemotherapy | Total mortality(n=694)                                      | ≥30 vs 18.5-24.9 kg/m <sup>2</sup>   | 1.260 (1.032-1.527)                  | Age, race, tumor stage, nuclear grade, lymph vascular invasion, positive lymph nodes, pCR status |
|                                                                                                       |                                                                                  |                                                                                                                                                               |                                             |                                                                                        | Recurrence free survival(n=936)                             | <18.5 vs 18.5-24.9 kg/m <sup>2</sup> | 2.23 (1.038-4.788)                   |                                                                                                  |
| Liu, 2018 <sup>184</sup> ,<br><br>BMI – Included, review                                              | Retrospective cohort study (n= 273 )<br>Pre- and postmenopausal                  | Diagnosis year: January 2004 and February 2016<br>Follow up= 32.6 months<br>Loss to follow up 1 patient<br>Overall 33 deaths<br>60 event-free survival events | Invasive breast cancer                      | From records, average 2.7 months after diagnosis                                       | Overall survival(n=8)<br>HR+/HER2- with aromatase inhibitor | ≥30 vs < 30 kg/m <sup>2</sup>        | 0.45 ( 0.09 - 2.26 )<br><br>P =0.34  | Hormonal therapy                                                                                 |
|                                                                                                       |                                                                                  |                                                                                                                                                               |                                             |                                                                                        | Overall survival(n=4)<br>HR+/HER2- with tamoxifen           | ≥30 vs < 30 kg/m <sup>2</sup>        | 9.27 ( 0.96 - 89.31 )<br><br>P =0.05 |                                                                                                  |
|                                                                                                       |                                                                                  |                                                                                                                                                               |                                             |                                                                                        | Overall survival(n=4)<br>HER2 positive                      | ≥30 vs < 30 kg/m <sup>2</sup>        | 1.35 ( 0.22 - 8.19 )<br><br>P =0.75  |                                                                                                  |
|                                                                                                       |                                                                                  |                                                                                                                                                               |                                             |                                                                                        | Overall survival(n=12)<br>Triple-negative                   | ≥30 vs < 30 kg/m <sup>2</sup>        | 3 ( 0.95 - 9.51 )<br><br>P =0.06     |                                                                                                  |



|                                                                                                                                                                   |                                                                                                                   |                                                                                                                                                                                                                                      |                                                              |                                                                         |                                                                           |                                       |                                        |                                                                                                                                                                                                                                                                                                                                                                                                                        |
|-------------------------------------------------------------------------------------------------------------------------------------------------------------------|-------------------------------------------------------------------------------------------------------------------|--------------------------------------------------------------------------------------------------------------------------------------------------------------------------------------------------------------------------------------|--------------------------------------------------------------|-------------------------------------------------------------------------|---------------------------------------------------------------------------|---------------------------------------|----------------------------------------|------------------------------------------------------------------------------------------------------------------------------------------------------------------------------------------------------------------------------------------------------------------------------------------------------------------------------------------------------------------------------------------------------------------------|
|                                                                                                                                                                   |                                                                                                                   |                                                                                                                                                                                                                                      |                                                              |                                                                         | Event free(n=15)<br>HR+/HER2- with<br>aromatase<br>inhibitor              | ≥30 vs < 30 kg/m <sup>2</sup>         | 0.92 ( 0.32 - 2.6 )<br><br>P =0.87     |                                                                                                                                                                                                                                                                                                                                                                                                                        |
|                                                                                                                                                                   |                                                                                                                   |                                                                                                                                                                                                                                      |                                                              |                                                                         | Event free(n=11)<br>HR+/HER2- with<br>tamoxifen                           | ≥30 vs < 30 kg/m <sup>2</sup>         | 2.47 ( 0.72 - 8.49 )<br><br>P =0.15    |                                                                                                                                                                                                                                                                                                                                                                                                                        |
|                                                                                                                                                                   |                                                                                                                   |                                                                                                                                                                                                                                      |                                                              |                                                                         | Event free(n=11)<br>HER2 positive                                         | ≥30 vs < 30 kg/m <sup>2</sup>         | 3.37 ( 0.97 - 11.72 )<br><br>P =0.06   |                                                                                                                                                                                                                                                                                                                                                                                                                        |
|                                                                                                                                                                   |                                                                                                                   |                                                                                                                                                                                                                                      |                                                              |                                                                         | Event free(n=18)<br>Triple-negative                                       | ≥30 vs < 30 kg/m <sup>2</sup>         | 2.62 ( 1.03 - 6.66 )<br><br>P =0.04    |                                                                                                                                                                                                                                                                                                                                                                                                                        |
| Maliniak ML,<br>2018 <sup>91</sup> ,<br><br>Cancer<br>Prevention Study<br>(CPS)-II Nutrition<br>Cohort, United<br>States,<br><br>BMI – Included,<br>meta-analysis | Population-based<br>study<br><br>(n= 5254)<br><br>Postmenopausal<br>Age ≥65 years<br><br>3% non-<br>white/unknown | Diagnosis: 1992-<br>2013<br><br>Follow-up= 13.3<br>years for cases<br>diagnosed at 46-<br>64 years; 7.5<br>years for age 65-<br>92 years<br><br>1771 deaths, 505<br>breast cancer<br>deaths<br><br>100 patients loss<br>to follow-up | Invasive breast cancer,<br>stage I-III, local or<br>regional | Self-reported,<br>questionnaire,<br>median 3.1 years<br>after diagnosis | All-cause<br>mortality (n=222)<br><br>Diagnosed at age<br>46-64 years     | ≥35 vs 18.5-24.9<br>kg/m <sup>2</sup> | 1.08 (0.66 - 1.76)<br><br>P trend=0.45 | Age at diagnosis, race,<br>calendar year, SEER<br>summary stage at<br>diagnosis, post-<br>diagnosis physical<br>activity, post-diagnosis<br>number of<br>comorbidities, post-<br>diagnosis use of<br>hormone replacement<br>therapy, post-diagnosis<br>alcohol intake, pre-<br>diagnosis other cancer<br>diagnosis, smoking<br>status<br><br>(Other covariates were<br>tested but not included<br>in the final models) |
|                                                                                                                                                                   |                                                                                                                   |                                                                                                                                                                                                                                      |                                                              |                                                                         |                                                                           | Per 5 kg/m <sup>2</sup>               | 0.95 (0.82 - 1.09)                     |                                                                                                                                                                                                                                                                                                                                                                                                                        |
|                                                                                                                                                                   |                                                                                                                   |                                                                                                                                                                                                                                      |                                                              |                                                                         | All-cause<br>mortality<br>(n=1114)<br><br>Diagnosed at age<br>65–92 years | ≥35 vs 18.5-24.9<br>kg/m <sup>2</sup> | 1.26 (0.97 - 1.63)<br><br>P trend=0.57 |                                                                                                                                                                                                                                                                                                                                                                                                                        |
|                                                                                                                                                                   |                                                                                                                   |                                                                                                                                                                                                                                      |                                                              |                                                                         |                                                                           | Per 5 kg/m <sup>2</sup>               | 0.98 (0.92 - 1.05)                     |                                                                                                                                                                                                                                                                                                                                                                                                                        |

|                                                                 |                                                             |                                                                 |                                                                                |                                    |                                                                          |                                    |                                           |                                                                                                       |
|-----------------------------------------------------------------|-------------------------------------------------------------|-----------------------------------------------------------------|--------------------------------------------------------------------------------|------------------------------------|--------------------------------------------------------------------------|------------------------------------|-------------------------------------------|-------------------------------------------------------------------------------------------------------|
|                                                                 |                                                             |                                                                 |                                                                                |                                    |                                                                          |                                    | P interaction=0.66                        |                                                                                                       |
|                                                                 |                                                             |                                                                 |                                                                                |                                    | Breast cancer-specific mortality (n=95)<br>Diagnosed at age 46-64 years  | ≥35 vs 18.5-24.9 kg/m <sup>2</sup> | 0.73 ( 0.32 - 1.68 )<br>P trend=0.28      | Above factors without smoking habits                                                                  |
|                                                                 |                                                             |                                                                 |                                                                                |                                    |                                                                          | Per 5 kg/m <sup>2</sup>            | 0.89 ( 0.71 - 1.1 )                       |                                                                                                       |
|                                                                 |                                                             |                                                                 |                                                                                |                                    | Breast cancer-specific mortality (n=231)<br>Diagnosed at age 65-92 years | ≥35 vs 18.5-24.9 kg/m <sup>2</sup> | 2.11 ( 1.27 - 3.52 )<br>P trend=0.01      |                                                                                                       |
|                                                                 |                                                             |                                                                 |                                                                                |                                    |                                                                          | Per 5 kg/m <sup>2</sup>            | 1.19 (1.04 - 1.36 )<br>P interaction=0.02 |                                                                                                       |
|                                                                 |                                                             |                                                                 |                                                                                |                                    | Breast cancer-specific mortality<br>Received chemotherapy                | Per 5 kg/m <sup>2</sup>            | 1.29 (1.03-1.61)                          |                                                                                                       |
|                                                                 |                                                             |                                                                 |                                                                                |                                    | Breast cancer-specific mortality<br>Not received chemotherapy            | Per 5 kg/m <sup>2</sup>            | 1.32 (1.08-1.61)<br>P-interaction=0.88    |                                                                                                       |
|                                                                 |                                                             |                                                                 |                                                                                |                                    | Breast cancer-specific mortality<br>Comorbidities 0                      | Per 5 kg/m <sup>2</sup>            | 1.25 (0.90-1.76)                          |                                                                                                       |
|                                                                 |                                                             |                                                                 |                                                                                |                                    | Breast cancer-specific mortality<br>Comorbidities 1+                     | Per 5 kg/m <sup>2</sup>            | 1.21 (1.05-1.40)<br>P-interaction=0.84    |                                                                                                       |
| Martel , 2018 <sup>187</sup> , Italy,<br>BMI – Included, review | Retrospective cohort study (n=329 ) Pre- and postmenopausal | 2000-2013<br>Follow up= 3 years<br>Loss to follow up: 1 patient | HER2-positive metastatic breast cancer, treated with trastuzumab-based therapy | BMI collected at time of diagnosis | Overall survival(n=154)                                                  | ≥25 vs < 25 kg/m <sup>2</sup>      | 0.88 ( 0.59 - 1.31 )<br>P =0.525          | BMI, age, histological grade, number of metastatic sites, visceral involvement, disease-free interval |

|                                                                                                                                                                        |                                                                                                              |                                                                                                |                                                                                                                                                                                      |                           |                                           |                                       |                                      |                                                                                                                                                                                                                         |
|------------------------------------------------------------------------------------------------------------------------------------------------------------------------|--------------------------------------------------------------------------------------------------------------|------------------------------------------------------------------------------------------------|--------------------------------------------------------------------------------------------------------------------------------------------------------------------------------------|---------------------------|-------------------------------------------|---------------------------------------|--------------------------------------|-------------------------------------------------------------------------------------------------------------------------------------------------------------------------------------------------------------------------|
|                                                                                                                                                                        |                                                                                                              |                                                                                                | Liver metastasis 31.6%                                                                                                                                                               |                           |                                           |                                       |                                      |                                                                                                                                                                                                                         |
|                                                                                                                                                                        |                                                                                                              |                                                                                                |                                                                                                                                                                                      |                           | Progression-free(n=279)                   | ≥25 vs < 25 kg/m <sup>2</sup>         | 0.95 ( 0.75 - 1.2 )<br>P =0.691      |                                                                                                                                                                                                                         |
| Moore, 2018 <sup>95</sup> ,<br>Patterns of Care<br>Study for Breast<br>and Prostate<br>Cancers (POC-<br>BC), United<br>States,<br><br>BMI – Included,<br>meta-analysis | Retrospective<br>cohort study (n=<br>5394)<br><br>Age range:20-98<br>years<br><br>Pre- and<br>postmenopausal | Diagnosis year:<br>2004-2012<br><br>Follow up= 8<br>years<br><br>Loss to follow: 6<br>patients | Invasive breast cancer.<br>Stage I 48.4%,<br>II 37.6%, III 14%<br><br>ER+ and/or PR+ 73%.<br>ER- and PR- 22.5%,<br>unknown 4.5%<br><br>HER2+ 34.4%,<br>HER2- 49.7%,<br>unknown 15.9% | Measured at<br>diagnosis. | All-cause<br>mortality                    | ≥35 vs 18.5-24.9<br>kg/m <sup>2</sup> | 0.85 (0.67 - 1.08)                   | Age, American joint<br>committee on cancer<br>stage, insurance type,<br>poverty in census tract<br>of residence, education,<br>urbanicity of residence<br>area, tumor grade,<br>hormone receptor<br>status, comorbidity |
|                                                                                                                                                                        |                                                                                                              |                                                                                                |                                                                                                                                                                                      |                           | All-cause<br>mortality                    | Per 5 kg/m <sup>2</sup>               | 0.93 ( 0.87 - 0.95 )                 |                                                                                                                                                                                                                         |
|                                                                                                                                                                        |                                                                                                              |                                                                                                |                                                                                                                                                                                      |                           | All-cause<br>mortality<br><br>ER positive | ≥35 vs 18.5-24.9<br>kg/m <sup>2</sup> | 0.86 ( 0.64 - 1.16 )<br>P trend=0.03 |                                                                                                                                                                                                                         |
|                                                                                                                                                                        |                                                                                                              |                                                                                                |                                                                                                                                                                                      |                           | All-cause<br>mortality<br><br>ER negative | ≥35 vs 18.5-24.9<br>kg/m <sup>2</sup> | 0.86 ( 0.55 - 1.34 )<br>P trend=0.22 |                                                                                                                                                                                                                         |
|                                                                                                                                                                        |                                                                                                              |                                                                                                |                                                                                                                                                                                      |                           | All-cause<br>mortality<br><br><50 years   | ≥35 vs 18.5-24.9<br>kg/m <sup>2</sup> | 1.04 (0.63-1.73)                     |                                                                                                                                                                                                                         |
|                                                                                                                                                                        |                                                                                                              |                                                                                                |                                                                                                                                                                                      |                           |                                           | Per 5 kg/m <sup>2</sup>               | 1.01 (0.91-1.13)                     |                                                                                                                                                                                                                         |

|  |  |  |  |  |                                                 |                                       |                                          |  |
|--|--|--|--|--|-------------------------------------------------|---------------------------------------|------------------------------------------|--|
|  |  |  |  |  | All-cause mortality<br>50-69 years              | ≥35 vs 18.5-24.9<br>kg/m <sup>2</sup> | 0.84 (0.56-1.28)                         |  |
|  |  |  |  |  |                                                 | Per 5 kg/m <sup>2</sup>               | 0.95 (0.86-1.05)                         |  |
|  |  |  |  |  | All-cause mortality<br>≥70 years                | ≥35 vs 18.5-24.9<br>kg/m <sup>2</sup> | 0.78 (0.52-1.17)                         |  |
|  |  |  |  |  |                                                 | Per 5 kg/m <sup>2</sup>               | 0.85 (0.75-0.95)<br>P interaction = 0.01 |  |
|  |  |  |  |  | Breast cancer-specific mortality                | ≥35 vs 18.5 kg/m <sup>2</sup>         | 0.93 ( 0.64 - 1.35 )                     |  |
|  |  |  |  |  | Breast cancer-specific mortality                | Per 5 kg/m <sup>2</sup>               | 0.98 ( 0.94 - 1.02 )                     |  |
|  |  |  |  |  | Breast cancer-specific mortality<br>ER positive | ≥35 vs 18.5-24.9<br>kg/m <sup>2</sup> | 0.95 ( 0.57 - 1.57 )<br>P trend=0.75     |  |
|  |  |  |  |  | Breast cancer-specific mortality<br>ER negative | ≥35 vs 18.5-24.9<br>kg/m <sup>2</sup> | 0.87 (0.51 - 1.49 )<br>P trend=0.58      |  |
|  |  |  |  |  | Non-breast-cancer-related death                 | ≥35 vs 18.5-24.9<br>kg/m <sup>2</sup> | 0.88 (0.64 - 1.21)                       |  |
|  |  |  |  |  | Non-breast-cancer-related death                 | Per 5 kg/m <sup>2</sup>               | 0.9 (0.82 - 0.99)                        |  |
|  |  |  |  |  | Non-breast-cancer-related death<br>ER positive  | ≥35 vs 18.5-24.9<br>kg/m <sup>2</sup> | 0.95 (0.67 - 1.36)<br>P trend=0.07       |  |
|  |  |  |  |  | Non-breast-cancer-related death                 | ≥35 vs 18.5-24.9<br>kg/m <sup>2</sup> | 0.77 (0.31 - 1.88)<br>P trend=0.58       |  |

|                                                                             |                                                                                                                          |                                                                          |                                                                                                                                                                                                                                                                                                                                                                                 |                                                                  | ER negative                             |                                |                                     |                                                                                                                                  |
|-----------------------------------------------------------------------------|--------------------------------------------------------------------------------------------------------------------------|--------------------------------------------------------------------------|---------------------------------------------------------------------------------------------------------------------------------------------------------------------------------------------------------------------------------------------------------------------------------------------------------------------------------------------------------------------------------|------------------------------------------------------------------|-----------------------------------------|--------------------------------|-------------------------------------|----------------------------------------------------------------------------------------------------------------------------------|
| Morrison VA, 2018 <sup>316</sup> , CALGB, BMI - Excluded                    | Secondary analysis of clinical trial (n= 615)<br>Age ≥65 years<br>Postmenopausal                                         | From September 2001 through December 2006<br>Follow-up: median 2.4 years | Stage I-IIIb                                                                                                                                                                                                                                                                                                                                                                    | BSA and BMI were measured prior to chemotherapy                  | Overall survival                        | >30 vs 23-25 kg/m <sup>2</sup> | 0.99 (0.63 - 1.56)<br>P trend=0.087 | Unadjusted                                                                                                                       |
|                                                                             |                                                                                                                          |                                                                          |                                                                                                                                                                                                                                                                                                                                                                                 |                                                                  | Relapse-free survival                   | >30 vs 23-25 kg/m <sup>2</sup> | 1.02 (0.68 - 1.55)<br>P trend=0.25  | Unadjusted                                                                                                                       |
| Mutschler NS, 2018 <sup>191</sup> , ADEBAR, Germany, BMI – Included, review | Secondary analysis of clinical trial (n= 1080 )<br>Pre- and postmenopausal<br>Mean age: 53 years                         | 2001-2005<br>Follow up= 62.9 months                                      | Lymph node+ early breast cancer, no metastasis                                                                                                                                                                                                                                                                                                                                  | Measured Prior to adjuvant therapy                               | Overall survival(n=186)                 | ≥ 30 vs <30 kg/m <sup>2</sup>  | 1.46 ( 1.02 - 2.11 )<br>P =0.041    | Age, menopausal status, tumor stage, nodal status, grade, histological type, hormone receptor status, HER2 status , chemotherapy |
|                                                                             |                                                                                                                          |                                                                          |                                                                                                                                                                                                                                                                                                                                                                                 |                                                                  | Disease-free survival(n=303)            | ≥ 30 vs <30 kg/m <sup>2</sup>  | 1.38 ( 1.03 - 1.84 )<br>P =0.032    |                                                                                                                                  |
| Pizzuti L, 2018 <sup>321</sup> , Italy, BMI - Excluded                      | Retrospective cohort of cancer survivors (n= 196)<br>Pre- and postmenopausal, age range 31-82 years, median age 56 years | Diagnosed and treated from 2008 through 2015                             | HER2-negative metastatic breast cancer<br>ER+ and/or PgR positive 74.5%, Triple negative 22%, unknown 3.5%<br>Metastatic spread 34.2% 1 site, 31.6% 2 sites, 34.2% 3 sites<br>metastatic at diagnosis 18.4%, metastatic pattern viscera 60.7%, bones 11.7%, other sites 27.6 %<br>Neo/adjuvant chemotherapy 70.4%, adjuvant endocrine agents 61.2%, adjuvant radiotherapy 55.6% | Weight, height from records and BMI calculated at study baseline | Overall survival                        | ≥ 25 vs < 25 kg/m <sup>2</sup> | P log-rank test = 0.67              | Unadjusted                                                                                                                       |
|                                                                             |                                                                                                                          |                                                                          |                                                                                                                                                                                                                                                                                                                                                                                 |                                                                  | Overall survival ER and/or PgR positive | ≥ 25 vs < 25 kg/m <sup>2</sup> | P log-rank test = 0.41              | Unadjusted                                                                                                                       |

|                                                           |                                                        |                                                                                                                   |                                                                                                                                                                                                                                            |                                           |                                                  |                                |                        |                                                                                                                                               |
|-----------------------------------------------------------|--------------------------------------------------------|-------------------------------------------------------------------------------------------------------------------|--------------------------------------------------------------------------------------------------------------------------------------------------------------------------------------------------------------------------------------------|-------------------------------------------|--------------------------------------------------|--------------------------------|------------------------|-----------------------------------------------------------------------------------------------------------------------------------------------|
|                                                           |                                                        |                                                                                                                   |                                                                                                                                                                                                                                            |                                           | Overall survival Triple-negative                 | ≥ 25 vs < 25 kg/m <sup>2</sup> | P log-rank test = 0.02 | Unadjusted                                                                                                                                    |
|                                                           |                                                        |                                                                                                                   |                                                                                                                                                                                                                                            |                                           | Progression-free survival                        | ≥ 25 vs < 25 kg/m <sup>2</sup> | P log-rank test = 0.33 |                                                                                                                                               |
|                                                           |                                                        |                                                                                                                   |                                                                                                                                                                                                                                            |                                           | Progression-free survival ER and/or PgR positive | ≥ 25 vs < 25 kg/m <sup>2</sup> | P log-rank test = 0.85 | Unadjusted                                                                                                                                    |
|                                                           |                                                        |                                                                                                                   |                                                                                                                                                                                                                                            |                                           | Progression-free survival Triple-negative        | ≥ 25 vs < 25 kg/m <sup>2</sup> | P log-rank test = 0.04 | Unadjusted                                                                                                                                    |
| Song, 2018 <sup>202</sup> , Korea, BMI – Included, review | Retrospective cohort study (n=1460) Mean age: 46 years | 2001-2009 Follow up= 8.07 years 185 patients (12.7%) experienced disease recurrence, and 93 patients (6.4%) died. | Invasive, stage I, 38.2%; stage II, 46.5%; and stage III, 15.3% ER+ 70.3% PR+ 65.3% HER2+ 14.8% Chemotherapy 81.8% Unknown 6.8% Radiotherapy 79.9% Unknown: 8.2% Anti-hormonal therapy 71.5% Unknown: 6.5% Operation: MRM: 19.7% PM: 80.3% | From records at diagnosis; within 2 years | Overall survival(n=93)                           | ≥25 vs <25 kg/m <sup>2</sup>   | 1.26 ( 0.74 - 2.15 )   | Age at diagnosis, stage including T stage and N stage, tumor grade, ER, PR, Ki-67, type of operation, anti-hormone therapy, and muscle volume |
|                                                           |                                                        |                                                                                                                   |                                                                                                                                                                                                                                            |                                           | Overall survival(n=93)                           | Per unit increase              | 1.02 ( 0.96 - 1.08 )   |                                                                                                                                               |
|                                                           |                                                        |                                                                                                                   |                                                                                                                                                                                                                                            |                                           | Recurrence-free survival (n=185)                 | ≥25 vs <25 kg/m <sup>2</sup>   | 1.05 ( 0.74 - 1.49 )   | Stage, PR, type of operation, radiotherapy, anti-hormone therapy, and muscle volume                                                           |
|                                                           |                                                        |                                                                                                                   |                                                                                                                                                                                                                                            |                                           | Recurrence-free survival (n=185)                 | Per unit increase              | 1.03 (0.98-1.07)       |                                                                                                                                               |

|                                                                                     |                                                                                                              |                                                                                                                                                                |                           |                                                                                |                                                             |                               |                         |                                                                                                                                         |
|-------------------------------------------------------------------------------------|--------------------------------------------------------------------------------------------------------------|----------------------------------------------------------------------------------------------------------------------------------------------------------------|---------------------------|--------------------------------------------------------------------------------|-------------------------------------------------------------|-------------------------------|-------------------------|-----------------------------------------------------------------------------------------------------------------------------------------|
| Strand F, 2018 <sup>245</sup> ,<br>Libro-1, Sweden<br><br>BMI – Included,<br>review | Female,<br>Population-based<br>Cohort Study<br>(n=2012) mean<br>age:60.3, Cancer<br>Diagnosis: 2011-<br>2008 | Diagnosed:2011-<br>2008                                                                                                                                        | Invasive breast cancer.   | Self-reported                                                                  | Disease<br>progression<br>(n=153)                           | >=25 vs <25 kg/m <sup>2</sup> | 1.18(0.84-1.64)         | Age, mammogram                                                                                                                          |
|                                                                                     |                                                                                                              |                                                                                                                                                                |                           |                                                                                | Screen-detected<br>cancers Disease<br>progression<br>(n=81) |                               | 0.97(0.62-1.52)         |                                                                                                                                         |
|                                                                                     |                                                                                                              |                                                                                                                                                                |                           |                                                                                | Interval cancer<br>Disease<br>progression<br>(n=72)         |                               | 1.70(1.04-2.77)         |                                                                                                                                         |
| Sun, 2018 <sup>110</sup> ,<br>China,<br><br>BMI – Included,<br>meta-analysis        | Retrospective<br>cohort study (n=<br>1017) Pre- and<br>post-menopausal                                       | 2004-2012<br><br>Follow up= 80<br>months<br><br>115 breast cancer<br>deaths<br><br>180 disease-free<br>survival events<br><br>76 patients lost to<br>follow-up | Grade I-III breast cancer | At/during<br>diagnosis weight<br>and height were<br>recorded before<br>surgery | Breast cancer<br>mortality (n=115)                          | ≥30 vs <25 kg/m <sup>2</sup>  | 2.052 (1.262 - 3.336 )  | Age at diagnosis, lymph<br>node status, tumor size,<br>histological grade, ER<br>status, PR status,<br>radiotherapy, hormone<br>therapy |
|                                                                                     |                                                                                                              |                                                                                                                                                                |                           |                                                                                | Breast cancer<br>mortality<br>Pre-menopausal                | ≥30 vs <25 kg/m <sup>2</sup>  | 1.948 ( 1.029 - 3.687 ) |                                                                                                                                         |
|                                                                                     |                                                                                                              |                                                                                                                                                                |                           |                                                                                | Breast cancer<br>mortality<br>Post-menopausal               | ≥30 vs <25 kg/m <sup>2</sup>  | 2.493 ( 1.117 - 5.564 ) |                                                                                                                                         |
|                                                                                     |                                                                                                              |                                                                                                                                                                |                           |                                                                                | Breast cancer<br>recurrence<br>(n=180)                      | ≥30 vs <25 kg/m <sup>2</sup>  | 1.888 ( 1.281 - 2.783 ) |                                                                                                                                         |
|                                                                                     |                                                                                                              |                                                                                                                                                                |                           |                                                                                | Breast cancer<br>recurrence<br>Pre-menopausal               | ≥30 vs <25 kg/m <sup>2</sup>  | 1.824 ( 1.096 - 3.037 ) |                                                                                                                                         |

|                                                                                    |                                                         |                                                                                                                                           |                                                                                                                                                                                            |                                            |                                             |                                                            |                         |                                                                                                            |
|------------------------------------------------------------------------------------|---------------------------------------------------------|-------------------------------------------------------------------------------------------------------------------------------------------|--------------------------------------------------------------------------------------------------------------------------------------------------------------------------------------------|--------------------------------------------|---------------------------------------------|------------------------------------------------------------|-------------------------|------------------------------------------------------------------------------------------------------------|
|                                                                                    |                                                         |                                                                                                                                           |                                                                                                                                                                                            |                                            | Breast cancer recurrence<br>Post-menopausal | ≥30 vs <25 kg/m <sup>2</sup>                               | 2.031 ( 1.091 - 3.782 ) |                                                                                                            |
| Venturelli, 2018 <sup>346</sup> , TPM, Italy,<br><br>BMI - Excluded                | Retrospective cohort study (n=460 )<br>Postmenopausal   | Diagnosis year: 2003-2006<br>Follow up= 6.3 years<br>45 breast cancer recurrence, 31 deaths (8 progressive disease, 23 other than cancer) | ER-positive postmenopausal breast cancer<br>22.4% PR-, 77.6% PR+;<br>8.5% AR-, 37.1% AR+<60%;<br>54.5%AR+≥60%;<br>55.5% HER2-,<br>28.4% HER2+2+, 16.1% HER2+3+<br>Endocrine therapy: 93.5% | Self-reported<br>At first clinical visit   | Disease-free survival(n=45)                 | Obese vs Normal weight                                     | P = 0.021               | Unadjusted                                                                                                 |
| Wisse, 2018 <sup>207</sup> , BC Blood Study, Sweden,<br><br>BMI – Included, review | Prospective cohort study (n=1640 ) Mean age: 60.9 years | 2002- 2016<br>Follow up= 3.05 years<br>166 breast cancer events<br>139 died due to any cause, 78 of whom had a prior breast cancer event  | Invasive breast cancer, no metastasis<br>ER+ 88.5%, PgR+ 71.1%, HER2+ 11.1% Tumor grade: 27.8% III<br>Chemotherapy: 27.6%;<br>Radiotherapy: 61.7%;<br>Trastuzumab: 8.1%                    | Measured/self-reported<br>Prior to surgery | Overall survival(n=136)                     | ≥25 vs <25 kg/m <sup>2</sup>                               | 1.82 ( 1.24 - 2.65 )    | Age, tumor size, lymph node involvement, histological grade, ER status, alcohol intake, smoking, treatment |
|                                                                                    |                                                         |                                                                                                                                           |                                                                                                                                                                                            |                                            | Overall survival (n=111)                    | ≥25 vs <25                                                 | 1.63 ( 1.00 - 2.64 )    | Above factors +waist circumference, breast volume                                                          |
|                                                                                    |                                                         |                                                                                                                                           |                                                                                                                                                                                            |                                            | Overall survival (n=133)                    | BMI≥25 and WC≥80 vs BMI <25 kg/m <sup>2</sup> and WC<80 cm | 2.28 ( 1.32 - 3.92 )    | Above factors                                                                                              |
|                                                                                    |                                                         |                                                                                                                                           |                                                                                                                                                                                            |                                            | Overall survival (n=111)                    | BMI≥25 and WC≥80 vs BMI <25 kg/m <sup>2</sup> and WC<80 cm | 2.17 ( 1.11 - 4.23 )    | Above factors +waist circumference, breast volume                                                          |
|                                                                                    |                                                         |                                                                                                                                           |                                                                                                                                                                                            |                                            | Overall survival ER positive                | ≥25 vs <25 kg/m <sup>2</sup>                               | 1.91 ( 1.26 - 2.91 )    | Above factors                                                                                              |
|                                                                                    |                                                         |                                                                                                                                           |                                                                                                                                                                                            |                                            | Overall survival ER negative                | ≥25 vs <25 kg/m <sup>2</sup>                               | ( - )                   | Above factors                                                                                              |
|                                                                                    |                                                         |                                                                                                                                           |                                                                                                                                                                                            |                                            | Breast cancer recurrence(n=165 )            | ≥25 vs <25 kg/m <sup>2</sup>                               | 1.36 ( 0.99 - 1.89 )    | Above factors                                                                                              |



|                                                             |                                                                                                                |                                           |                                                                                                                                                                                                                                   |                                                  |                                                  |                                                            |                         |                                                   |
|-------------------------------------------------------------|----------------------------------------------------------------------------------------------------------------|-------------------------------------------|-----------------------------------------------------------------------------------------------------------------------------------------------------------------------------------------------------------------------------------|--------------------------------------------------|--------------------------------------------------|------------------------------------------------------------|-------------------------|---------------------------------------------------|
|                                                             |                                                                                                                |                                           |                                                                                                                                                                                                                                   |                                                  | Breast cancer recurrence(n=144 )                 | ≥25 vs <25 kg/m <sup>2</sup>                               | 0.94 ( 0.62 - 1.41 )    | Above factors +waist circumference, breast volume |
|                                                             |                                                                                                                |                                           |                                                                                                                                                                                                                                   |                                                  | Breast cancer recurrence(n=162 )                 | BMI≥25 and WC≥80 vs BMI <25 kg/m <sup>2</sup> and WC<80 cm | 1.72 ( 1.12 - 2.65 )    | Above factors                                     |
|                                                             |                                                                                                                |                                           |                                                                                                                                                                                                                                   |                                                  | Breast cancer recurrence(n=144 )                 | BMI≥25 and WC≥80 vs BMI <25 kg/m <sup>2</sup> and WC<80 cm | 1.31 ( 0.78 - 2.2 )     | Above factors +waist circumference, breast volume |
|                                                             |                                                                                                                |                                           |                                                                                                                                                                                                                                   |                                                  | Breast cancer recurrence ER positive             | ≥25 vs <25 kg/m <sup>2</sup>                               | 1.45 ( 1.02 - 2.08 )    | Above factors                                     |
|                                                             |                                                                                                                |                                           |                                                                                                                                                                                                                                   |                                                  | Breast cancer recurrence ER negative             | ≥25 vs <25 kg/m <sup>2</sup>                               | 0.93 ( 0.47 - 1.85 )    | Above factors                                     |
|                                                             |                                                                                                                |                                           |                                                                                                                                                                                                                                   |                                                  | Overall survival ≥50 years ER+ Tamoxifen         | ≥25 vs <25 kg/m <sup>2</sup>                               | 2.28 (1.29-4.03)        | Above factors                                     |
|                                                             |                                                                                                                |                                           |                                                                                                                                                                                                                                   |                                                  | Overall survival ≥50 years ER+ AI                | ≥25 vs <25 kg/m <sup>2</sup>                               | 1.75 (0.92-2.30)        | Above factors                                     |
|                                                             |                                                                                                                |                                           |                                                                                                                                                                                                                                   |                                                  | Overall survival Chemo-naive                     | ≥25 vs <25 kg/m <sup>2</sup>                               | 1.91 (1.26-2.91)        | Above factors                                     |
|                                                             |                                                                                                                |                                           |                                                                                                                                                                                                                                   |                                                  | Breast cancer recurrence ≥50 years ER+ Tamoxifen | ≥25 vs <25 kg/m <sup>2</sup>                               | 1.72 (1.00-2.95)        | Above factors                                     |
|                                                             |                                                                                                                |                                           |                                                                                                                                                                                                                                   |                                                  | Breast cancer recurrence ≥50 years ER+ AI        | ≥25 vs <25 kg/m <sup>2</sup>                               | 1.71 (0.91-3.20)        | Above factors                                     |
| Zekri J, 2018 <sup>351</sup> , Saudi Arabia, BMI - Excluded | Retrospective cohort of cancer survivors (n= 320 ) Postmenopausal Age range: 45-95 years, mean age: 60.3 years | Treatment: 2005-2014 Follow up= 49 months | ER+ breast cancer; HER2+ 10.9%, HER2- 89.1% Invasive ductal carcinoma 90.6%, invasive lobular carcinoma 7.2%, mixed 2.2%; Grade I 8.1%, II 60%, III 32% Surgery: conservative: 50.9%, mastectomy 49.1%; All on adjuvant letrozole | From records at the time of treatment initiation | Recurrence-free survival                         | ≥ 30 vs <30 kg/m <sup>2</sup>                              | P log-rank test = 0.097 | Unadjusted                                        |

|                                                                                 |                                                                                               |                                                                                                                                      |                                                                                                                                     |                           |                                                   |                                    |                            |                                                                                                                                                                             |
|---------------------------------------------------------------------------------|-----------------------------------------------------------------------------------------------|--------------------------------------------------------------------------------------------------------------------------------------|-------------------------------------------------------------------------------------------------------------------------------------|---------------------------|---------------------------------------------------|------------------------------------|----------------------------|-----------------------------------------------------------------------------------------------------------------------------------------------------------------------------|
|                                                                                 |                                                                                               |                                                                                                                                      |                                                                                                                                     |                           | Recurrence-free survival<br>Received<br>Letrozole | ≥ 30 vs <30 kg/m <sup>2</sup>      | No significant association |                                                                                                                                                                             |
| Zewenghiel, 2018 <sup>212</sup> , Sweden,<br><br>BMI – Included, review         | Retrospective cohort study (n= 173 )<br>Post-menopausal mean age: 67 years                    | 2008-2016<br>Follow up= 38 months                                                                                                    | HR+ metastatic breast cancer (non-visceral, visceral, bone only)                                                                    | From records at diagnosis | Time to progression                               | ≥30 vs 18.5-24.9 kg/m <sup>2</sup> | 1.29 ( 0.75 - 2.24 )       | Charlson Comorbidity Index, Age to metastasis, Resistance to endocrine therapy, Type of metastasis, Molecular subtype, Tumor grade, Performance status, Metastasis location |
| Al Jarroudi, 2017 <sup>139</sup> , Morocco,<br><br>BMI – Included, review       | Retrospective cohort study (n= 115)<br>Pre- and postmenopausal                                | 2009-2011<br>Follow up= 5 years<br>Rates of overall mortality and disease progression at 5 years were 37.4% and 69.6%, respectively. | Triple-negative breast cancer                                                                                                       | At diagnosis              | Overall survival post-menopausal                  | >25 vs ≤25 kg/m <sup>2</sup>       | 2.903 ( 1.551 - 5.432 )    | Age at diagnosis, menopausal status, Tumor size, Nodal status, grade, Systemic adjuvant therapy                                                                             |
|                                                                                 |                                                                                               |                                                                                                                                      |                                                                                                                                     |                           | Overall survival pre-menopausal                   | >25 vs ≤25 kg/m <sup>2</sup>       | 2.752 ( 1.267 - 5.978 )    |                                                                                                                                                                             |
|                                                                                 |                                                                                               |                                                                                                                                      |                                                                                                                                     |                           | Overall survival post-menopausal                  | >25 vs ≤25 kg/m <sup>2</sup>       | 1.345 ( 0.375 - 4.831 )    |                                                                                                                                                                             |
|                                                                                 |                                                                                               |                                                                                                                                      |                                                                                                                                     |                           | Disease-free survival                             | >25 vs ≤25 kg/m <sup>2</sup>       | 1.899 ( 1.05 - 3.433 )     |                                                                                                                                                                             |
|                                                                                 |                                                                                               |                                                                                                                                      |                                                                                                                                     |                           | Disease-free survival pre-menopausal              | >25 vs ≤25 kg/m <sup>2</sup>       | 3.242 ( 1.249 - 8.412 )    |                                                                                                                                                                             |
|                                                                                 |                                                                                               |                                                                                                                                      |                                                                                                                                     |                           | Disease-free survival post-menopausal             | >25 vs ≤25 kg/m <sup>2</sup>       | 1.035 ( 0.276 - 6.172 )    |                                                                                                                                                                             |
| Andersson TM, 2017 <sup>137</sup> , Sweden<br><br>BMI – Included, meta-analysis | Female, Follow-up of Case-control Study (n=1740) age range: 50-74 years<br><br>Postmenopausal | Diagnosed:1993-1995 follow Up: Maximum 15 years , Loss to Follow-up: Not reported                                                    | Grade (n) Well- 186, moderately- 509, poorly- 497 differentiated, unknown 548. ER+1,003, ER- 242, unknown 495. Chemothreapy (n) yes | Self-reported             | Breast cancer-specific mortality (n=269.0)        | 28.13 vs 14.53 kg/m <sup>2</sup>   | 1.30(0.87-1.92)            | Age at diagnosis, chemotherapy, ER status, mammogram, number of lymph nodes, radiotherapy, tamoxifen use, tumor grade, tumor size                                           |

|                                                                                                             |                                                                                                      |                                                                                                 |                                                                                                                                                                                                                                                                                                                                   |                                  |                                        |                                |                                        |                                                                                                      |
|-------------------------------------------------------------------------------------------------------------|------------------------------------------------------------------------------------------------------|-------------------------------------------------------------------------------------------------|-----------------------------------------------------------------------------------------------------------------------------------------------------------------------------------------------------------------------------------------------------------------------------------------------------------------------------------|----------------------------------|----------------------------------------|--------------------------------|----------------------------------------|------------------------------------------------------------------------------------------------------|
|                                                                                                             |                                                                                                      |                                                                                                 | 127, no 1613.<br>Radiotherapy (n) yes<br>767, no 973.                                                                                                                                                                                                                                                                             |                                  |                                        |                                |                                        |                                                                                                      |
| Behrouzi, 2017 <sup>44</sup> ,<br>Iran,<br><br>BMI – Included,<br>meta-analysis                             | Retrospective<br>cohort study<br>(n=1021 ) Pre-<br>and<br>postmenopausal                             | Diagnosis year:<br>from July 2003<br>until December<br>2016. Follow up=<br>61 months were<br>48 | Invasive breast cancer<br>Stages I 14.4%,<br>IIA 29.1%, IIB 21.7%,<br>IIIA 19.0%, IIIB 7.5%, IIIC<br>8.3%<br><br>Luminal-A 53.2%,<br>Luminal-B 15.4%,<br><br>Triple-Negative 17.2%,<br>HER2type 14.3%<br>Chemotherapy:<br>Adjuvant: 89.1%<br>Neoadjuvant: 10.9%                                                                   | At diagnosis                     | Overall survival                       | Per 1 kg/m <sup>2</sup>        | 1.058 (1.027 - 1.09)                   | TNM stage, subtype,<br>Age, BMI                                                                      |
|                                                                                                             |                                                                                                      |                                                                                                 |                                                                                                                                                                                                                                                                                                                                   |                                  | Recurrence-free<br>survival            | Per 1 kg/m <sup>2</sup>        | 1.017 (0.992 - 1.042)                  |                                                                                                      |
| Biganzoli E, 2017 <sup>48</sup> ,<br>Belgian Phase<br>III, Belgium,<br><br>BMI – Included,<br>meta-analysis | Secondary<br>analysis of clinical<br>trial (n= 734)<br><br>Pre- (58%) and<br>postmenopausal<br>(42%) | Follow up= 15.4<br>years<br><br>368 outcome<br>events, including<br>250 distant<br>recurrence   | Node+ invasive breast<br>cancer, no metastasis<br><br>Grade I 23%, II 53%, III<br>24%<br><br>ER+ 74%, ER-26%<br><br>PR+ 68%, PR- 32%<br><br>Chemotherapy<br>regimens:<br><br>HDE vs SDE and CMF<br><br>Doses were calculated<br>by actual BSA without<br>any cap<br><br>Postmenopausal ER+<br>cases received<br>endocrine therapy | At diagnosis, no<br>further info | Breast cancer<br>recurrence<br>(n=368) | ≥30 vs ≤24.9 kg/m <sup>2</sup> | 1.09 (0.74 - 1.62)<br><br>P trend=0.65 | Age, menopausal<br>status, tumor size,<br>number of positive<br>lymph nodes, grade,<br>treatment arm |
|                                                                                                             |                                                                                                      |                                                                                                 |                                                                                                                                                                                                                                                                                                                                   |                                  |                                        | Per 10 kg/m <sup>2</sup>       | 1.29 ( 0.99 - 1.68 )                   |                                                                                                      |

|                                                                           |                                                                                     |                                                             |                                                                                                                                                                                                                                                                                                    |                                                          |                                                   |                                    |                                      |                                                                                                                                               |
|---------------------------------------------------------------------------|-------------------------------------------------------------------------------------|-------------------------------------------------------------|----------------------------------------------------------------------------------------------------------------------------------------------------------------------------------------------------------------------------------------------------------------------------------------------------|----------------------------------------------------------|---------------------------------------------------|------------------------------------|--------------------------------------|-----------------------------------------------------------------------------------------------------------------------------------------------|
|                                                                           |                                                                                     |                                                             |                                                                                                                                                                                                                                                                                                    |                                                          | Distant recurrence (n=250)                        | ≥30 vs ≤24.9 kg/m <sup>2</sup>     | 1.03 ( 0.63 - 1.67 )<br>P trend=0.38 |                                                                                                                                               |
|                                                                           |                                                                                     |                                                             |                                                                                                                                                                                                                                                                                                    |                                                          |                                                   | Per 10 kg/m <sup>2</sup>           | 1.17 ( 0.85 - 1.62 )                 |                                                                                                                                               |
| Björner, 2017 <sup>269</sup> , BC Blood Study, Sweden, BMI - Excluded     | Prospective cohort study (n= 1018 ) mean age: 61.1 years<br>Pre- and postmenopausal | 2002-2012<br>Follow up= 11 years                            | Invasive breast cancer, no metastasis<br>ER+ (>10%): 87.9%; PR+ (>10%): 71.0%; HER2 amplification: 12.2%<br>Ever chemotherapy: 25.4%<br>Ever radiotherapy: 63.0 %<br>Ever trastuzumab: 8.9%<br>ER+ only: ever endocrine therapy: 77.7%<br>Ever tamoxifen: 59.1%<br>Ever aromatase inhibitor: 38.7% | Measured prior to surgery                                | all-cause mortality<br>Insulinogenic load ≥median | overweight/obese vs normal weight  | 0.35 ( 0.17 - 0.72 )                 | Age, Tumor size, lymph node involvement, histological grade, ER status, BMI, Treatment, Time between cancer diagnosis and exposure assessment |
|                                                                           |                                                                                     |                                                             |                                                                                                                                                                                                                                                                                                    |                                                          | Event free<br>Insulinogenic load ≥median          |                                    | 0.48 ( 0.25 - 0.92 )                 |                                                                                                                                               |
| Boivin, 2017 <sup>270</sup> , France, BMI - Excluded                      | Retrospective cohort study (n= 1599 )<br>Pre- and postmenopausal                    | Diagnosed 2009<br>Follow up= 36.4 months                    |                                                                                                                                                                                                                                                                                                    | Measured/self-reported                                   | Overall survival                                  | obese vs underweight               | P =0.30                              | Unadjusted                                                                                                                                    |
| Buono, 2017 <sup>145</sup> , Italy, BMI – Included, review                | Prospective cohort study (n= 841 )<br>Pre and post-menopausal                       | 2009-2013<br>Follow up= 58.9 months                         | Stage I-III C                                                                                                                                                                                                                                                                                      | At diagnosis                                             | Overall survival                                  | Obesity vs no obesity and diabetes | 0.66 ( 0.3 - 1.47 )<br>P =0.3        | Age, stage, Molecular subtype, Treatment                                                                                                      |
|                                                                           |                                                                                     |                                                             |                                                                                                                                                                                                                                                                                                    |                                                          | Disease-free survival                             |                                    | 0.96 ( 0.59 - 1.56 )<br>P =0.8       |                                                                                                                                               |
| Cespedes Feliciano, 2017 <sup>278</sup> , KPNC and UTMACC, BMI - Excluded | Prospective cohort study (n= 1559 )<br>Age range:18-79 years                        | 1996-2013<br>Follow up= 9 years<br>312 breast cancer deaths | Stage I-III<br>Stage I 50%, II 43%, Luminal A 54%<br>Luminal B 20%<br>HER2+ 15%<br>Basal-like 11%                                                                                                                                                                                                  | self-reported, 1 year prior and <7 months post-diagnosis | Breast cancer-specific mortality(n=312)           | ≥35 vs 18.5-<25 kg/m <sup>2</sup>  | 1.06 ( 0.74 - 1.52 )                 | PAM50 subtype, Age, menopausal status, race/ethnicity, study, stage, chemotherapy                                                             |

|  |  |                       |  |  |                                                            |                                   |                      |
|--|--|-----------------------|--|--|------------------------------------------------------------|-----------------------------------|----------------------|
|  |  | 378 recurrent disease |  |  |                                                            |                                   |                      |
|  |  |                       |  |  |                                                            | Per 5 kg/m <sup>2</sup>           | 1.05 ( 0.95 - 1.15 ) |
|  |  |                       |  |  | Breast cancer-specific mortality(n=110) Luminal A          | ≥35 vs 18.5-<25 kg/m <sup>2</sup> | 2.24 ( 1.22 - 4.11 ) |
|  |  |                       |  |  |                                                            | Per 5 kg/m <sup>2</sup>           | 1.31 ( 1.11 - 1.54 ) |
|  |  |                       |  |  | Breast cancer-specific mortality(n=94) Luminal B           | ≥35 vs 18.5-<25 kg/m <sup>2</sup> | 0.61 ( 0.29 - 1.29 ) |
|  |  |                       |  |  |                                                            | Per 5 kg/m <sup>2</sup>           | 0.99 ( 0.83 - 1.18 ) |
|  |  |                       |  |  | Breast cancer-specific mortality(n=52) Basal               | ≥35 vs 18.5-<25 kg/m <sup>2</sup> | 0.67 ( 0.28 - 1.59 ) |
|  |  |                       |  |  |                                                            | Per 5 kg/m <sup>2</sup>           | 0.9 ( 0.73 - 1.11 )  |
|  |  |                       |  |  | Breast cancer-specific mortality(n=56) Her2-overexpressing | ≥35 vs 18.5-<25 kg/m <sup>2</sup> | 0.89 ( 0.37 - 2.15 ) |
|  |  |                       |  |  |                                                            | Per 5 kg/m <sup>2</sup>           | 0.92 ( 0.71 - 1.2 )  |
|  |  |                       |  |  | Breast cancer-specific mortality(n=204) Luminal A and B    | ≥35 vs 18.5-<25 kg/m <sup>2</sup> | 1.61 ( 0.85 - 3.06 ) |
|  |  |                       |  |  |                                                            | Per 5 kg/m <sup>2</sup>           | 1.21 ( 1.04 - 1.42 ) |
|  |  |                       |  |  | Breast cancer-specific                                     | ≥35 vs 18.5-<25 kg/m <sup>2</sup> | 0.71 ( 0.28 - 1.79 ) |

|  |  |  |  |  |                                                              |                                   |                      |
|--|--|--|--|--|--------------------------------------------------------------|-----------------------------------|----------------------|
|  |  |  |  |  | mortality(n=108)<br>Non-luminal                              |                                   |                      |
|  |  |  |  |  |                                                              | Per 5 kg/m <sup>2</sup>           | 0.9 ( 0.71 - 1.14 )  |
|  |  |  |  |  | Breast cancer<br>recurrence(n=378<br>)                       | ≥35 vs 18.5-<25 kg/m <sup>2</sup> | 1.02 ( 0.67 - 1.54 ) |
|  |  |  |  |  |                                                              | Per 5 kg/m <sup>2</sup>           | 1.03 ( 0.92 - 1.14 ) |
|  |  |  |  |  | Breast cancer<br>recurrence(n=130<br>) Luminal A             | ≥35 vs 18.5-<25 kg/m <sup>2</sup> | 2.17 ( 0.92 - 5.11 ) |
|  |  |  |  |  |                                                              | Per 5 kg/m <sup>2</sup>           | 1.24 ( 1 - 1.54 )    |
|  |  |  |  |  | Breast cancer<br>recurrence(n=115<br>) Luminal B             | ≥35 vs 18.5-<25 kg/m <sup>2</sup> | 0.58 ( 0.15 - 2.21 ) |
|  |  |  |  |  |                                                              | Per 5 kg/m <sup>2</sup>           | 0.98 ( 0.71 - 1.35 ) |
|  |  |  |  |  | Breast cancer<br>recurrence(n=59)<br>Basal                   | ≥35 vs 18.5-<25 kg/m <sup>2</sup> | 0.75 ( 0.25 - 2.25 ) |
|  |  |  |  |  |                                                              | Per 5 kg/m <sup>2</sup>           | 0.93 ( 0.74 - 1.17 ) |
|  |  |  |  |  | Breast cancer<br>recurrence(n=74)<br>Her2-<br>overexpressing | ≥35 vs 18.5-<25 kg/m <sup>2</sup> | 0.79 ( 0.21 - 2.99 ) |
|  |  |  |  |  |                                                              | Per 5 kg/m <sup>2</sup>           | 0.87 ( 0.53 - 1.41 ) |
|  |  |  |  |  | Breast cancer<br>recurrence(n=245<br>) Luminal A and B       | ≥35 vs 18.5-<25 kg/m <sup>2</sup> | 1.37 ( 0.79 - 2.39 ) |
|  |  |  |  |  |                                                              | Per 5 kg/m <sup>2</sup>           | 1.16 ( 1.01 - 1.33 ) |

|                                                                               |                                                     |                                                                                                                       |                                                                                                                                                                                                                                                    |                           |                                                      |                                   |                      |                                                                                          |
|-------------------------------------------------------------------------------|-----------------------------------------------------|-----------------------------------------------------------------------------------------------------------------------|----------------------------------------------------------------------------------------------------------------------------------------------------------------------------------------------------------------------------------------------------|---------------------------|------------------------------------------------------|-----------------------------------|----------------------|------------------------------------------------------------------------------------------|
|                                                                               |                                                     |                                                                                                                       |                                                                                                                                                                                                                                                    |                           | Breast cancer recurrence(n=133 .0) Non-luminal       | ≥35 vs 18.5-<25 kg/m <sup>2</sup> | 0.88 ( 0.37 - 2.14 ) |                                                                                          |
|                                                                               |                                                     |                                                                                                                       |                                                                                                                                                                                                                                                    |                           |                                                      | Per 5 kg/m <sup>2</sup>           | 0.96 ( 0.76 - 1.2 )  |                                                                                          |
| Chung, 2017 <sup>153</sup> ,<br>South Korea,<br><br>BMI – Included,<br>review | Retrospective cohort study (n= 8742 ) mean age:47.7 | 1997-2008<br>Follow up= 92 months<br>1178 deaths<br>957 breast cancer deaths<br>98 other deaths<br>123 unknown causes | Non-metastatic invasive breast cancer<br>T1: 4717; >T1: 3997<br>Hormone-receptor status: Negative: 3008; Positive: 5646<br>Radiation therapy No: 3675; Yes: 5032<br>Hormonal therapy No: 2648; Yes: 5985<br>Chemotherapy No: 2544; Yes: 6039 cases | Measured prior to surgery | all-cause mortality<br>Premenopausal                 | ≥30 vs 18.5-24.9kg/m <sup>2</sup> | 1.87 ( 1.2 - 2.91 )  | Age, Tumor size, number of lymph nodes, histological grade, Treatment, menopausal status |
|                                                                               |                                                     |                                                                                                                       |                                                                                                                                                                                                                                                    |                           | all-cause mortality<br>Postmenopausal<br>Node+       | ≥30 vs 18.5-24.9kg/m <sup>2</sup> | 0.57 ( 0.26 - 1.24 ) |                                                                                          |
|                                                                               |                                                     |                                                                                                                       |                                                                                                                                                                                                                                                    |                           | all-cause mortality<br>Postmenopausal<br>Node-       | ≥30 vs 18.5-24.9kg/m <sup>2</sup> | 1.24 ( 0.63 - 2.44 ) |                                                                                          |
|                                                                               |                                                     |                                                                                                                       |                                                                                                                                                                                                                                                    |                           | all-cause mortality<br>Hormone<br>Receptor+          | ≥30 vs 18.5-24.9kg/m <sup>2</sup> | 1.48 ( 0.97 - 2.25 ) |                                                                                          |
|                                                                               |                                                     |                                                                                                                       |                                                                                                                                                                                                                                                    |                           | all-cause mortality<br>Hormone<br>Receptor-<br>Node+ | ≥30 vs 18.5-24.9kg/m <sup>2</sup> | 0.44 ( 0.16 - 1.19 ) |                                                                                          |
|                                                                               |                                                     |                                                                                                                       |                                                                                                                                                                                                                                                    |                           | all-cause mortality<br>Hormone<br>Receptor-<br>Node- | ≥30 vs 18.5-24.9kg/m <sup>2</sup> | 1.49 ( 0.74 - 3.01 ) |                                                                                          |
|                                                                               |                                                     |                                                                                                                       |                                                                                                                                                                                                                                                    |                           | Breast cancer-specific mortality<br>Premenopausal    | ≥30 vs 18.5-24.9kg/m <sup>2</sup> | 2.04 ( 1.27 - 3.26 ) |                                                                                          |

|                                                                                                                                                     |                                                                                                     |                                        |                                                                       |                                 |                                                                   |                                                        |                                |                       |
|-----------------------------------------------------------------------------------------------------------------------------------------------------|-----------------------------------------------------------------------------------------------------|----------------------------------------|-----------------------------------------------------------------------|---------------------------------|-------------------------------------------------------------------|--------------------------------------------------------|--------------------------------|-----------------------|
|                                                                                                                                                     |                                                                                                     |                                        |                                                                       |                                 | Breast cancer-specific mortality<br>Postmenopausal<br>Node+       | ≥30 vs 18.5-24.9kg/m <sup>2</sup>                      | 0.65 ( 0.28 - 1.49 )           |                       |
|                                                                                                                                                     |                                                                                                     |                                        |                                                                       |                                 | Breast cancer-specific mortality<br>Postmenopausal<br>Node-       | ≥30 vs 18.5-24.9kg/m <sup>2</sup>                      | 1.13 ( 0.44 - 2.91 )           |                       |
|                                                                                                                                                     |                                                                                                     |                                        |                                                                       |                                 | Breast cancer-specific mortality<br>Hormone<br>Receptor+          | ≥30 vs 18.5-24.9kg/m <sup>2</sup>                      | 1.65 ( 1.02 - 2.66 )           |                       |
|                                                                                                                                                     |                                                                                                     |                                        |                                                                       |                                 | Breast cancer-specific mortality<br>Hormone<br>Receptor-<br>Node+ | ≥30 vs 18.5-24.9kg/m <sup>2</sup>                      | 0.53 ( 0.19 - 1.44 )           |                       |
|                                                                                                                                                     |                                                                                                     |                                        |                                                                       |                                 | Breast cancer-specific mortality<br>Hormone<br>Receptor-<br>Node- | ≥30 vs 18.5-24.9kg/m <sup>2</sup>                      | 1.55 ( 0.7 - 3.43 )            |                       |
| Farr, 2017 <sup>290</sup> ,<br>Department of<br>Obstetrics and<br>Gynecology,<br>Medical<br>University of<br>Vienna, Austria,<br><br>BMI - Excluded | Retrospective<br>cohort study (n=<br>120 )<br>Pre- and<br>postmenopausal<br>Mean age: 52.6<br>years | 2005-2015 Follow<br>up= 30.1 months    | 65.8% HR positive<br>34.2% HR negative<br>neoadjuvant<br>chemotherapy | Measured at<br>baseline         | Overall survival                                                  | obese vs non obese                                     | 0.29 ( 0.002 - 2.65 )          | Unadjusted            |
|                                                                                                                                                     |                                                                                                     |                                        |                                                                       |                                 | Disease-free<br>survival                                          | obese vs non obese                                     | 0.38 ( 0.04 - 1.59 )           | Unadjusted            |
|                                                                                                                                                     |                                                                                                     |                                        |                                                                       |                                 | Progression-free                                                  | obese vs non obese                                     | 0.1 ( 0.00084 - 0.81 )         | Unadjusted            |
| Guo Q, 2017 <sup>294</sup> ,<br>Six case-cohort<br>studies (COGS,                                                                                   | Mendelian<br>randomization<br>study                                                                 | Follow up=<br>170,504 person-<br>years | ER+ (n=22,567) ER-<br>(n=5683)                                        | BMI genetic risk<br>score (GRS) | Breast cancer<br>mortality<br>(n=1,161)                           | Individual-level data<br>MR analysis<br><br>Per 1 unit | 1.11 (1.01-1.22)<br><br>P=0.03 | Nodes, size and grade |



|                                                                                                             |                                                                    |                                                        |                                                                                                              |                                                                                          |                                                                                                                |                                                    |                                                                  |                                                |
|-------------------------------------------------------------------------------------------------------------|--------------------------------------------------------------------|--------------------------------------------------------|--------------------------------------------------------------------------------------------------------------|------------------------------------------------------------------------------------------|----------------------------------------------------------------------------------------------------------------|----------------------------------------------------|------------------------------------------------------------------|------------------------------------------------|
| CGEMS, METABRIC, PG-SNPs, SASBAC and UK2),<br><br>BMI - Excluded                                            | (n=36,210)                                                         |                                                        |                                                                                                              |                                                                                          | ER positive                                                                                                    |                                                    |                                                                  |                                                |
|                                                                                                             |                                                                    |                                                        |                                                                                                              | Self-reported at date closest to diagnosis for the cases or study entry for the controls | Breast cancer mortality (n=1,161)<br>ER positive                                                               | Observational estimates<br>Per 1 kg/m <sup>2</sup> | 1.02 (1.00 - 1.05)<br>P=0.05                                     |                                                |
|                                                                                                             |                                                                    |                                                        |                                                                                                              | BMI genetic risk score (GRS)                                                             | Breast cancer mortality (n=679)<br>ER negative                                                                 | Individual-level data<br>MR analysis<br>Per 1 unit | 1.00 (0.89-1.13)<br>P=0.95                                       |                                                |
|                                                                                                             |                                                                    |                                                        |                                                                                                              | Self-reported at date closest to diagnosis for the cases or study entry for the controls | Breast cancer mortality (n=679)<br>ER negative                                                                 | Observational estimates<br>Per 1 kg/m <sup>2</sup> | 1.00 (0.97 - 1.02)<br>P=0.77                                     |                                                |
| Greenlee H, 2017 <sup>252</sup> , SWOG phase II and III trials, Multi-country<br><br>BMI – Included, review | Female, Pooled Analysis (Any) (n=3145)                             | Follow Up: Minimum 5 years                             | CAF, CMF, or AC + Paclitaxel                                                                                 | Measured                                                                                 | CAF treatment Overall survival<br>AC + Paclitaxel treatment Overall survival<br>CMF treatment Overall survival | BMI >=25 vs BMI <25 kg/m <sup>2</sup>              | 1.18 (0.87-1.59)<br><br>1.25 (0.94-1.66)<br><br>1.27 (0.71-2.27) | Age, disease specific prognostic factors, race |
| Hamy AS, 2017 <sup>133</sup> , NEOREP Cohort, France                                                        | Female, Prospective Cohort of Cancer Survivors (n=175) mean age:47 | Diagnosed:2002-2012 (treatment) follow Up: Median 38.8 | HER2-positive invasive breast cancer. Grade I-II 24.16%, III 27.62%. ER negative 28.99%, positive 24.79%. PR | Measured                                                                                 | Disease free survival (n=17.0)                                                                                 | >25 vs 19-25 kg/m <sup>2</sup>                     | 5.21(1.80-15.11)<br>P trend=0.002                                | ER status, grade, other factors                |

|                                                                      |                                                                                                     |                                   |                                                                                                                                                                                                                                                                                                   |                                          |                                                                                          |                                |                                   |                                                                                                |
|----------------------------------------------------------------------|-----------------------------------------------------------------------------------------------------|-----------------------------------|---------------------------------------------------------------------------------------------------------------------------------------------------------------------------------------------------------------------------------------------------------------------------------------------------|------------------------------------------|------------------------------------------------------------------------------------------|--------------------------------|-----------------------------------|------------------------------------------------------------------------------------------------|
| BMI – Included, meta-analysis                                        | Premenopausal 25.95%, postmenopausal 27.49%                                                         | months                            | negative 27.51%, positive 23.98%. All patients received neoadjuvant chemotherapy followed by surgery and radiotherapy. Neoadjuvant trastuzumab 27.26%                                                                                                                                             |                                          | Treated with both neoadjuvant and adjuvant trastuzumab<br>Disease free survival (n=11.0) |                                | 3.76(1.10-12.85)<br>P trend=0.035 |                                                                                                |
| He, 2017 <sup>169</sup> , China<br><br>BMI – Included, meta-analysis | Retrospective cohort study (n=209), Pre and post-menopausal<br>Mean age: 49.05 years<br>Non-smokers | 2006-2009<br>Follow-up: 67 months | Invasive breast cancer<br>Clinical stage I-IV                                                                                                                                                                                                                                                     | From records at diagnosis before surgery | Distant disease free(n=55)                                                               | ≥24 vs <18.5 kg/m <sup>2</sup> | 0.804 ( 0.249 - 2.599 )           | Age at diagnosis, family history of breast cancer, high N classification, blood cadmium levels |
| Karatas, 2017 <sup>300</sup> , Turkey,<br><br>BMI - Excluded         | Retrospective cohort study (n=295 )<br>Pre and post-menopausal<br>Mean age:46.4 years               | 1994-2015 Follow up= 45.8 months  | Invasive breast cancer<br>AJCC staging 7 ed: II 51.5%, III 47.4%<br>ER+ 61%<br>ER- 39%<br>PR+ 55.9%<br>PR- 42.4%;<br>HRE2+ 30.2% HER2- 69.8%<br>Neoadjuvant chemotherapy and surgery: 99%;<br>Chemotherapy: 99%<br>86.1% taxane, 13.9% no taxane;<br>Hormonotherapy: 64.7%<br>Radiotherapy: 91.5% |                                          | Overall survival(n=63)                                                                   | Obese vs Normal/underweight    | P log-rank test=0.02              | Unadjusted                                                                                     |
|                                                                      |                                                                                                     |                                   |                                                                                                                                                                                                                                                                                                   |                                          | recurrence free survival(n=92)                                                           | Obese vs Normal/underweight    | P log-rank test=0.03              | Unadjusted                                                                                     |
| Kwak, 2017 <sup>180</sup> , Korea,<br><br>BMI – Included, review     | Retrospective cohort study (n=947 ) mean age:51.9                                                   | 2010-2011<br>109 deaths           | Tumor stage: localised, regional, distant, missing.                                                                                                                                                                                                                                               | at diagnosis from records                | Breast cancer-specific mortality                                                         | ≥24 vs <25 kg/m <sup>2</sup>   | 1.59 ( 1.07 - 2.37 )              | Age, area-level deprivation index, tumour stage, smoking, drinking, diagnosis path             |

|                                                                                                                                          |                                                                                                                                                                                         |                                                                                                      |                                                                                                                                                                                                                                                             |                                                                                        |                                                 |                                                   |                                |                                                                                                                                                                   |
|------------------------------------------------------------------------------------------------------------------------------------------|-----------------------------------------------------------------------------------------------------------------------------------------------------------------------------------------|------------------------------------------------------------------------------------------------------|-------------------------------------------------------------------------------------------------------------------------------------------------------------------------------------------------------------------------------------------------------------|----------------------------------------------------------------------------------------|-------------------------------------------------|---------------------------------------------------|--------------------------------|-------------------------------------------------------------------------------------------------------------------------------------------------------------------|
| Mu, 2017 <sup>96</sup> ,<br>China,<br><br>BMI – Included,<br>meta-analysis                                                               | Retrospective<br>cohort study (n=<br>2106)<br><br>Pre and post-<br>menopausal                                                                                                           | Follow up= 71<br>months<br><br>Loss of follow up:<br>23 patients                                     |                                                                                                                                                                                                                                                             | From records                                                                           | Breast cancer-<br>specific mortality<br>(n=190) | <18.5 vs ≥24 kg/m <sup>2</sup>                    | 0.67 (0.29 - 1.55)<br>P =0.347 | Age, tumour size,<br>lymph node status,<br>histological grade,<br>oestrogen receptor<br>level, progesterone<br>receptor level, HER2<br>status, hormone<br>therapy |
|                                                                                                                                          |                                                                                                                                                                                         |                                                                                                      |                                                                                                                                                                                                                                                             |                                                                                        | Breast cancer<br>relapse(n=300)                 | <18.5 vs ≥24 kg/m <sup>2</sup>                    | 0.58 (0.29 - 1.16)<br>P =0.122 |                                                                                                                                                                   |
| Nakamura K,<br>2017 <sup>97</sup> , Biobank<br>Japan (BBJ),<br>Japan,<br><br>BMI – Included,<br>meta-analysis                            | Prospective<br>cohort study of<br>cancer survivors<br>(n= 1860)<br><br>Pre- and<br>postmenopausal<br><br>Mean age: 55.3<br>years<br><br>Registered within<br>90 days post-<br>diagnosis | 2003-2008 Follow<br>up= 7.8 person-<br>years<br><br>218 deaths<br><br>1 patient loss to<br>follow-up | In situ:226,<br>invasive:1414 cases<br><br>Stage 0 10.9%<br><br>I 47.9%, IIA 31.3%, IIB<br>5.8%, IIIA 1.4%, IIIB<br>1.1%, IIIC 0.3%, IV 0.8%,<br>Unclassified 0.5%<br><br>Unknown 51.9%<br><br>ER+ 75.8%<br><br>ER- 24.2%<br><br>PR+ 62.1%<br><br>PR- 37.9% | Interview with<br>questionnaire at<br>study entry,<br>within 90 days<br>post-diagnosis | All-cause<br>mortality (n=206)                  | >25 vs 18.5-24.9<br>kg/m <sup>2</sup>             | 0.79 (0.53 - 1.18)             | Age at study entry,<br>entry year                                                                                                                                 |
|                                                                                                                                          |                                                                                                                                                                                         |                                                                                                      |                                                                                                                                                                                                                                                             |                                                                                        |                                                 | Per 1 kg/m <sup>2</sup>                           | 0.98 ( 0.94 - 1.02 )           |                                                                                                                                                                   |
| Pizzuti L, 2017 <sup>246</sup> ,<br>The everext study,<br>Italy<br><br>BMI – Excluded<br>(mortality)<br>Included, review<br>(recurrence) | Female,<br>Retrospective<br>Cohort of Cancer<br>Survivors (n=102)<br>mean<br>age:60.9Post-<br>menopausal 100%                                                                           | Follow Up:<br>Maximum 18<br>months                                                                   | HR+HER2-advanced<br>breast cancer Mean<br>number of cycles of<br>everolimus and<br>exemestane received<br>was 9±7, which in 30<br>(29.4%) patients were<br>administered in first line                                                                       | Self-reported                                                                          | Overall survival                                | Highest BMI category<br>vs Lowest BMI<br>category | P trend=0.17                   | ER status, grade, other<br>factors                                                                                                                                |

|                                                                                        |                                                                                                      |                                                                  |                                                                                                                                                                                                                                                                                                                                                                                                 |                                                           |                                         |                                             |                                    |                                                                                                                |
|----------------------------------------------------------------------------------------|------------------------------------------------------------------------------------------------------|------------------------------------------------------------------|-------------------------------------------------------------------------------------------------------------------------------------------------------------------------------------------------------------------------------------------------------------------------------------------------------------------------------------------------------------------------------------------------|-----------------------------------------------------------|-----------------------------------------|---------------------------------------------|------------------------------------|----------------------------------------------------------------------------------------------------------------|
|                                                                                        |                                                                                                      |                                                                  |                                                                                                                                                                                                                                                                                                                                                                                                 |                                                           | Progression-free survival               |                                             | 0.75(0.45-1.25) P trend=0.269      | Chemotherapy, fasting glucose                                                                                  |
| Pizzuti L, 2017 <sup>194</sup> , Italy,<br><br>BMI – Included, review                  | Retrospective cohort study (n=161)<br>Postmenopausal<br>Age range: 35-87 years, mean age: 68.9 years |                                                                  | Hormone-receptor positive metastatic breast cancer<br>HER-2+ 8.1%, HER-2- 88.8% metastatic sites 1 48.4%, 2 40.4%, ≥ 3 11.2%, patterns: bones 31.1%, viscera 10.6%, miscellanea 58.4%<br>ECOG PS 0 68.9%, 1 23%, 2 4.3%<br>Grade 1-2 endocrine-resistant patients 62.5%, endocrine-responsive patients 56.7%<br>Grade 3 endocrine-resistant patients 28.1%, endocrine-responsive patients 22.7% | From records<br>prior exposure to endocrine therapy       | Progression-free<br>Endocrine sensitive | ≥ 25 vs < 25 kg/m <sup>2</sup>              | 1.89 ( 0.94 - 3.82 )<br><br>P=0.08 | BMI, HER2 status, age, fulvestrant in subsequent line vs 1st, number of metastatic sites, visceral involvement |
|                                                                                        |                                                                                                      |                                                                  |                                                                                                                                                                                                                                                                                                                                                                                                 |                                                           | Overall survival<br>Endocrine resistant | ≥ 25 vs < 25 kg/m <sup>2</sup>              | 1.89 ( 1.11 - 3.24 )<br><br>P=0.02 |                                                                                                                |
| Rier 2017 <sup>105</sup> , Netherlands<br><br>BMI – Included, meta-analysis            | Female,<br>Retrospective Cohort of Cancer Survivors (n=166)                                          | Follow Up:<br>Average 22 months<br>No loss to follow-up          | Distant metastatic breast cancer                                                                                                                                                                                                                                                                                                                                                                | Medical records                                           | All-cause mortality (n=140)             | Highest BMI category vs Lowest BMI category | 0.99 (0.96-1.02)<br>Ptrend =0.41   | Age, HR status, year of diagnosis, metastatic location, HER2Neu status                                         |
| Robinson, 2017 <sup>325</sup> , New Zealand cohort, New Zealand,<br><br>BMI - Excluded | Prospective cohort study (n=5458 )<br>Pre- and postmenopausal<br>Mean age:55 years                   | First breast cancer prior to 31 Dec 2014<br>Follow up= 3.2 years | Invasive breast cancer<br>ER+ 4163 cases, ER- 1189 cases,<br>PgR+ 3392 cases,<br>PfR- 1919 cases,<br>HER2+ 1038 cases,<br>HER2- 3397 cases<br>Grade: low 834 cases,<br>Intermediate 2424 cases,<br>high 1959 cases                                                                                                                                                                              | Weight and height recorded at the time of first diagnosis | Total mortality pre-menopausal          | 35-39.9 vs 18.5-24.9 kg/m <sup>2</sup>      | P log-rank test = 0.045            | Unadjusted                                                                                                     |

|                                                                          |                                                                                                      |                                                  |                                                                                                                                                                                                                                                                                                                                                                                                                                      |                                                              |                              |                                          |                                           |                                                                                             |
|--------------------------------------------------------------------------|------------------------------------------------------------------------------------------------------|--------------------------------------------------|--------------------------------------------------------------------------------------------------------------------------------------------------------------------------------------------------------------------------------------------------------------------------------------------------------------------------------------------------------------------------------------------------------------------------------------|--------------------------------------------------------------|------------------------------|------------------------------------------|-------------------------------------------|---------------------------------------------------------------------------------------------|
|                                                                          |                                                                                                      |                                                  | Metastases at diagnosis<br>285 cases                                                                                                                                                                                                                                                                                                                                                                                                 |                                                              |                              |                                          |                                           |                                                                                             |
|                                                                          |                                                                                                      |                                                  |                                                                                                                                                                                                                                                                                                                                                                                                                                      |                                                              | Total mortality<br>≥55 years | ≥35 vs vs 18.5-24.9<br>kg/m <sup>2</sup> | 0.72 ( - )                                | Unadjusted                                                                                  |
|                                                                          |                                                                                                      |                                                  |                                                                                                                                                                                                                                                                                                                                                                                                                                      |                                                              | Total mortality<br><55 years | ≥35 vs 18.5-24.9<br>kg/m <sup>2</sup>    | 1.4 ( - )                                 | Unadjusted                                                                                  |
| Sahin, 2017 <sup>197</sup> ,<br>Turkey,<br><br>BMI – Included,<br>review | Retrospective<br>cohort study (n=<br>3767 )<br>Pre and Post-<br>menopausal<br>Mean age:48.6<br>years | 1994-2015<br>Follow up= 48.6<br>months           | Invasive breast cancer<br>Clinical stage<br>I: 21.8% II: 41.7% III:<br>25.7% IV: 8.9%<br>Missing: 1.8%<br>Luminal-like: 65.9%<br>HER2/Luminal-like:<br>13.6%<br>HER2-like: 8.8%<br>Triple negative: 11.7%<br>Adjuvant chemotherapy<br>Pre: 84.8% Post: 63.7%<br>Adjuvant radiotherapy<br>Pre: 76.5% Post: 68.8%<br>Adjuvant endocrine<br>therapy Pre: 78.3%<br>Post: 80.0%<br>Surgery MRM: 33.2%<br>BCS: 60.8%<br>Not operated: 6.0% | At diagnosis from<br>records                                 | Overall survival             | ≥30 vs <30 kg/m <sup>2</sup>             | 1.505 ( 1.101 - 2.059 )<br><br>P =0.009   | Molecular subtypes,<br>lymphovascular<br>invasion, tumour stage,<br>nodal stage, metastasis |
| Schvartzman,<br>2017 <sup>200</sup> ,<br>UTMDACC, United<br>States       | Retrospective<br>cohort study (n=<br>1998 )                                                          | Treatment: 2004-<br>2015 Follow up=<br>7.1 years | Invasive breast cancer<br>Stage I-III                                                                                                                                                                                                                                                                                                                                                                                                | BMI was<br>calculated at<br>diagnosis, first<br>chemotherapy | Overall survival             | >40 vs 18-25 kg/m <sup>2</sup>           | 1.36 ( 0.67 - 2.78 )<br><br>P trend=0.353 | Unadjusted                                                                                  |

|                                                                                                              |                                                                                                                         |                                                                                            |                                                                                                                                                           |                                                                                                                                                       |                                         |                                          |                                       |                                                                                                                                                                                                                                                  |
|--------------------------------------------------------------------------------------------------------------|-------------------------------------------------------------------------------------------------------------------------|--------------------------------------------------------------------------------------------|-----------------------------------------------------------------------------------------------------------------------------------------------------------|-------------------------------------------------------------------------------------------------------------------------------------------------------|-----------------------------------------|------------------------------------------|---------------------------------------|--------------------------------------------------------------------------------------------------------------------------------------------------------------------------------------------------------------------------------------------------|
| BMI - Excluded                                                                                               | Pre and postmenopausal                                                                                                  |                                                                                            | Majority hormone receptor-positive and HER-2- negative                                                                                                    | date, last chemotherapy date, and 1 year after last chemotherapy date from records                                                                    |                                         |                                          |                                       |                                                                                                                                                                                                                                                  |
|                                                                                                              |                                                                                                                         |                                                                                            |                                                                                                                                                           |                                                                                                                                                       | Locoregional recurrence(n=46)           | >40 vs 18-25 kg/m <sup>2</sup>           | 0.99 ( 0.22 - 4.35 )<br>P trend=0.184 | Unadjusted                                                                                                                                                                                                                                       |
| Veal CT, 2017 <sup>114</sup> , Wisconsin In Situ Cohort (WISC), United States, BMI – Included, meta-analysis | Prospective cohort study of cancer survivors (n= 1925) Pre- and postmenopausal Age range: 20-74 years Response rate 76% | 1997-2006 Follow up= 6.7 years 196 deaths 87 cancer deaths, 34 CVD deaths, 75 other deaths | DCIS Mastectomy ipsilateral 33.4%, bilateral 7% Breast conserving surgery no radiation 12.1%, with radiation 44.6% Biopsy only 3% Endocrine therapy 39.2% | Self-reported in baseline telephone interview, median 1.3 years after diagnosis, then in 3 follow-up questionnaires; treated as time-varying variable | All-cause mortality (n=196)             | ≥35 vs 18.5-24.9 kg/m <sup>2</sup>       | 1.24 ( 0.76 - 2.02 )                  | Age at diagnosis, family history of breast cancer, education, surgical treatment type, year of diagnosis, post-treatment endocrine therapy use, comorbidity, post-menopausal hormone use, physical activity, alcohol consumption, smoking habits |
|                                                                                                              |                                                                                                                         |                                                                                            |                                                                                                                                                           |                                                                                                                                                       |                                         | Per 1 kg/m <sup>2</sup>                  | 1.00 ( 0.98 - 1.03 )                  |                                                                                                                                                                                                                                                  |
|                                                                                                              |                                                                                                                         |                                                                                            |                                                                                                                                                           |                                                                                                                                                       | All-cause mortality (n=196)             | ≥35 vs 18.5-24.9 kg/m <sup>2</sup>       | 1.48 ( 0.69 - 3.19 )                  | Above factors + pre-diagnosis BMI                                                                                                                                                                                                                |
|                                                                                                              |                                                                                                                         |                                                                                            |                                                                                                                                                           |                                                                                                                                                       |                                         | Per 1 kg/m <sup>2</sup>                  | 1.02 ( 0.98 - 1.07 )                  |                                                                                                                                                                                                                                                  |
|                                                                                                              |                                                                                                                         |                                                                                            |                                                                                                                                                           |                                                                                                                                                       | Cancer mortality (n=87)                 | ≥35 vs 18.5-24.9 kg/m <sup>2</sup>       | 1.34 ( 0.66 - 2.73 )                  |                                                                                                                                                                                                                                                  |
|                                                                                                              |                                                                                                                         |                                                                                            |                                                                                                                                                           |                                                                                                                                                       |                                         | Per 1 kg/m <sup>2</sup>                  | 1.00 ( 0.96 - 1.04 )                  |                                                                                                                                                                                                                                                  |
|                                                                                                              |                                                                                                                         |                                                                                            |                                                                                                                                                           |                                                                                                                                                       | Cancer mortality (n=87)                 | ≥35 vs 18.5-24.9 kg/m <sup>2</sup>       | 1.68 (0.56 - 5.01)                    | Above factors + pre-diagnosis BMI                                                                                                                                                                                                                |
|                                                                                                              |                                                                                                                         |                                                                                            |                                                                                                                                                           |                                                                                                                                                       |                                         | Per 1 kg/m <sup>2</sup>                  | 1.01 (0.94 - 1.08)                    |                                                                                                                                                                                                                                                  |
|                                                                                                              |                                                                                                                         |                                                                                            |                                                                                                                                                           |                                                                                                                                                       | Cardiovascular disease mortality (n=34) | ≥35 vs 18.5-24.9 kg/m <sup>2</sup>       | 1.18 (0.3 - 4.68)                     |                                                                                                                                                                                                                                                  |
|                                                                                                              |                                                                                                                         |                                                                                            |                                                                                                                                                           |                                                                                                                                                       |                                         | Per 1 kg/m <sup>2</sup>                  | 1.01 (0.95 - 1.07)                    |                                                                                                                                                                                                                                                  |
|                                                                                                              |                                                                                                                         |                                                                                            |                                                                                                                                                           |                                                                                                                                                       | Cardiovascular disease mortality (n=34) | ≥35 vs 18.5-24.9 kg/m <sup>2</sup>       | 0.36 (0.05 - 2.74)                    | Above factors + pre-diagnosis BMI                                                                                                                                                                                                                |
|                                                                                                              |                                                                                                                         |                                                                                            |                                                                                                                                                           |                                                                                                                                                       |                                         | Per 1 kg/m <sup>2</sup>                  | 0.96 (0.85 - 1.08)                    |                                                                                                                                                                                                                                                  |
| Wu R, 2017 <sup>380</sup> , China                                                                            | Female, Retrospective                                                                                                   |                                                                                            | Modified radical mastectomy or breast                                                                                                                     | Registry database                                                                                                                                     | Overall survival                        | Obese vs Normal weight kg/m <sup>2</sup> | Log rank P=0.04                       |                                                                                                                                                                                                                                                  |

|                                                                               |                                                                                                                                           |                                                                                                                                                        |                                                                                                                                                                                    |                                                                        |                               |                                                   |                      |                                                                                                      |
|-------------------------------------------------------------------------------|-------------------------------------------------------------------------------------------------------------------------------------------|--------------------------------------------------------------------------------------------------------------------------------------------------------|------------------------------------------------------------------------------------------------------------------------------------------------------------------------------------|------------------------------------------------------------------------|-------------------------------|---------------------------------------------------|----------------------|------------------------------------------------------------------------------------------------------|
| BMI - Excluded                                                                | Cohort of Cancer Survivors (n=219)                                                                                                        |                                                                                                                                                        | conserving surgery, completed adjuvant or neoadjuvant chemotherapy                                                                                                                 |                                                                        | Recurrence free survival      |                                                   | Log rank P=0.018     |                                                                                                      |
| Wu, 2017 <sup>350</sup> ,<br>UTMDACC,<br>United States,<br><br>BMI - Excluded | Retrospective cohort study (n= 15314)<br>Pre and post-menopausal<br>Age:54.5 years                                                        | Treatment: 1997-2012<br>Follow up= 6.09-7.95 years<br>Discovery cohort: 1627 deaths, 1144 recurrence<br>Validation cohort: 1095 deaths, 684 recurrence | Invasive breast cancer<br>AJCC stage I-III                                                                                                                                         | Self-reported within a year of diagnosis                               | all-cause mortality(n=869)    | ≥30 vs <25 kg/m <sup>2</sup>                      | 1.55 ( 1.32 - 1.83 ) |                                                                                                      |
|                                                                               |                                                                                                                                           |                                                                                                                                                        |                                                                                                                                                                                    |                                                                        | recurrence(n=900 )            | ≥30 vs <25 kg/m <sup>2</sup>                      | 1.28 ( 1.09 - 1.49 ) |                                                                                                      |
| Yan M, 2017 <sup>210</sup> ,<br>China,<br><br>BMI – Included, review          | Retrospective cohort of cancer survivors (n= 646)<br>Pre and postmenopausal<br>Age range:21-83 years                                      | Treatment: 2009-2011<br>Follow up= 67 months                                                                                                           | Hormone receptor + and HER2- breast cancer<br>Early stage I-III<br>ER+ and PR+ 76%<br>ER+/PR- 17%<br>ER-/PR+ 7%<br>Neoadjuvant 91%<br>Chemotherapy 7%<br>Adjuvant radiotherapy 27% | From records At 6 months of treatment with tamoxifen                   | Disease-free survival (n=274) | ≥24 vs 18.5-23.9 kg/m <sup>2</sup>                | 1.02 ( 0.73 - 1.42 ) | Tumor size, lymphatic metastasis, p53 mutation, Ki-67 expression, neighbourhood socioeconomic status |
| Yerushalmi R, 2017 <sup>211</sup> , CCTG trials,<br><br>BMI – Excluded        | Pre-, peri-, and early post-menopausal<br><br>Adjuvant chemotherapy trials:<br><br>MA.5 (n=710)<br>Premenopausal (100%)<br>MA.21 (n=2083) | MA.5<br>10-year follow-up<br><br>MA.21<br>8-year follow-up                                                                                             | MA.5<br>Node+ 100%<br>T1/in situ 37%<br>HR+ 68%<br>Chemotherapy 100%<br>Anthracyclines 49%<br>Randomised to CEF or CMF                                                             | Weight and height measured at baseline, 1, 3 and 5 years after accrual | Overall survival              | Baseline BMI 1 y post diagnosis<br>Per 1 log unit | 1.007 (0.986- 1.029) | Baseline risk factors                                                                                |

|  |                                                |  |                                                                                                                                                                                                       |  |                                  |                                                              |                      |  |
|--|------------------------------------------------|--|-------------------------------------------------------------------------------------------------------------------------------------------------------------------------------------------------------|--|----------------------------------|--------------------------------------------------------------|----------------------|--|
|  | <p>Premenopausal (68%)</p> <p>Total n=2793</p> |  | <p>MA.21</p> <p>Node+ 72%</p> <p>High risk node- 28%</p> <p>T1/in situ 35%</p> <p>HR+ 61%</p> <p>Chemotherapy 100%</p> <p>Anthracyclines 100%</p> <p>Randomised to CEF or dose dense EC/T or AC/T</p> |  |                                  |                                                              |                      |  |
|  |                                                |  |                                                                                                                                                                                                       |  | Overall survival                 | <p>Baseline BMI 3 y post diagnosis</p> <p>Per 1 log unit</p> | 1.007 (0.979- 1.036) |  |
|  |                                                |  |                                                                                                                                                                                                       |  | Overall survival                 | <p>Baseline BMI 5 y post diagnosis</p> <p>Per 1 log unit</p> | 1.011 (0.975- 1.049) |  |
|  |                                                |  |                                                                                                                                                                                                       |  | Breast cancer-specific mortality | <p>Baseline BMI 1 y post diagnosis</p> <p>Per 1 log unit</p> | 1.015 (0.992-1.038)  |  |
|  |                                                |  |                                                                                                                                                                                                       |  | Breast cancer-specific mortality | <p>Baseline BMI 3 y post diagnosis</p> <p>Per 1 log unit</p> | 1.015 (0.985-1.046)  |  |
|  |                                                |  |                                                                                                                                                                                                       |  | Breast cancer-specific mortality | <p>Baseline BMI 5 y post diagnosis</p> <p>Per 1 log unit</p> | 1.020 (0.979-1.062)  |  |
|  |                                                |  |                                                                                                                                                                                                       |  | Breast cancer-free interval      | <p>Baseline BMI 1 y post diagnosis</p> <p>Per 1 log unit</p> | 1.004 (0.983-1.025)  |  |
|  |                                                |  |                                                                                                                                                                                                       |  | Breast cancer-free interval      | <p>Baseline BMI 3 y post diagnosis</p>                       | 1.004 (0.977-1.033)  |  |



|  |                                                                                                                          |  |                                                                                                                                                             |                                                                        |                                  |                                                   |                     |  |
|--|--------------------------------------------------------------------------------------------------------------------------|--|-------------------------------------------------------------------------------------------------------------------------------------------------------------|------------------------------------------------------------------------|----------------------------------|---------------------------------------------------|---------------------|--|
|  |                                                                                                                          |  |                                                                                                                                                             |                                                                        |                                  | Per 1 log unit                                    |                     |  |
|  |                                                                                                                          |  |                                                                                                                                                             |                                                                        | Breast cancer-free interval      | Baseline BMI 5 y post diagnosis<br>Per 1 log unit | 0.983 (0.946-1.022) |  |
|  | Pre-, peri-, and early post-menopausal<br><br>Adjuvant endocrine therapy trial MA.12 (n=672)<br><br>Premenopausal (100%) |  | MA.12<br>Node+ 75%<br>T1/in situ 43%<br>HR+ 75%<br>Chemotherapy 100%<br>Anthracyclines 55%<br>Women completed CMF, CEF, or AC received tamoxifen or placebo | Weight and height measured at baseline, 1, 3 and 5 years after accrual | Overall survival                 | Baseline BMI 1 y post diagnosis<br>Per 1 log unit | 1.024 (0.993-1.057) |  |
|  |                                                                                                                          |  |                                                                                                                                                             |                                                                        | Overall survival                 | Baseline BMI 3 y post diagnosis<br>Per 1 log unit | 1.032 (0.991-1.076) |  |
|  |                                                                                                                          |  |                                                                                                                                                             |                                                                        | Overall survival                 | Baseline BMI 5 y post diagnosis<br>Per 1 log unit | 1.128 (1.036-1.228) |  |
|  |                                                                                                                          |  |                                                                                                                                                             |                                                                        | Breast cancer-specific mortality | Baseline BMI 1 y post diagnosis<br>Per 1 log unit | 1.033 (1.000-1.066) |  |
|  |                                                                                                                          |  |                                                                                                                                                             |                                                                        | Breast cancer-specific mortality | Baseline BMI 3 y post diagnosis<br>Per 1 log unit | 1.034 (0.992-1.079) |  |
|  |                                                                                                                          |  |                                                                                                                                                             |                                                                        | Breast cancer-specific mortality | Baseline BMI 5 y post diagnosis<br>Per 1 log unit | 1.135 (1.041-1.238) |  |
|  |                                                                                                                          |  |                                                                                                                                                             |                                                                        | Breast cancer-free interval      | Baseline BMI 1 y post diagnosis                   | 1.033 (1.006-1.061) |  |

|  |                                                                                                                                                 |  |                               |                                                                        |                                  |                                                   |                     |  |
|--|-------------------------------------------------------------------------------------------------------------------------------------------------|--|-------------------------------|------------------------------------------------------------------------|----------------------------------|---------------------------------------------------|---------------------|--|
|  |                                                                                                                                                 |  |                               |                                                                        |                                  | Per 1 log unit                                    |                     |  |
|  |                                                                                                                                                 |  |                               |                                                                        | Breast cancer-free interval      | Baseline BMI 3 y post diagnosis<br>Per 1 log unit | 1.014 (0.973-1.057) |  |
|  |                                                                                                                                                 |  |                               |                                                                        | Breast cancer-free interval      | Baseline BMI 5 y post diagnosis<br>Per 1 log unit | 1.036 (0.979-1.100) |  |
|  | Pre-, peri-, and early post-menopausal trials:<br>MA.5<br>Premenopausal (100%)<br>MA.12<br>Premenopausal (100%)<br>MA.21<br>Premenopausal (68%) |  | Triple-negative breast cancer | Weight and height measured at baseline, 1, 3 and 5 years after accrual | Overall survival                 | Baseline BMI 1 y post diagnosis<br>Per 1 log unit | 1.016 (0.972-1.063) |  |
|  |                                                                                                                                                 |  |                               |                                                                        | Overall survival                 | Baseline BMI 3 y post diagnosis<br>Per 1 log unit | 1.001 (0.934-1.072) |  |
|  |                                                                                                                                                 |  |                               |                                                                        | Overall survival                 | Baseline BMI 5 y post diagnosis<br>Per 1 log unit | 0.989 (0.892-1.096) |  |
|  |                                                                                                                                                 |  |                               |                                                                        | Breast cancer-specific mortality | Baseline BMI 1 y post diagnosis<br>Per 1 log unit | 1.028 (0.980-1.079) |  |
|  |                                                                                                                                                 |  |                               |                                                                        | Breast cancer-specific mortality | Baseline BMI 3 y post diagnosis                   | 1.021 (0.950-1.098) |  |

|  |                                                                                              |  |                                                                                                                                                                                                                                  |                                                                        |                                  |                                                   |                     |  |
|--|----------------------------------------------------------------------------------------------|--|----------------------------------------------------------------------------------------------------------------------------------------------------------------------------------------------------------------------------------|------------------------------------------------------------------------|----------------------------------|---------------------------------------------------|---------------------|--|
|  |                                                                                              |  |                                                                                                                                                                                                                                  |                                                                        |                                  | Per 1 log unit                                    |                     |  |
|  |                                                                                              |  |                                                                                                                                                                                                                                  |                                                                        | Breast cancer-specific mortality | Baseline BMI 5 y post diagnosis<br>Per 1 log unit | 0.994 (0.876-1.127) |  |
|  |                                                                                              |  |                                                                                                                                                                                                                                  |                                                                        | Breast cancer-free interval      | Baseline BMI 1 y post diagnosis<br>Per 1 log unit | 1.016 (0.972-1.062) |  |
|  |                                                                                              |  |                                                                                                                                                                                                                                  |                                                                        | Breast cancer-free interval      | Baseline BMI 3 y post diagnosis<br>Per 1 log unit | 0.992 (0.925-1.064) |  |
|  |                                                                                              |  |                                                                                                                                                                                                                                  |                                                                        | Breast cancer-free interval      | Baseline BMI 5 y post diagnosis<br>Per 1 log unit | 0.877 (0.764-1.006) |  |
|  | Postmenopausal endocrine therapy trials<br>MA.14 (n=665)<br>MA.27 (n=7571)<br>Postmenopausal |  | MA.14<br>Node+ 47%<br>T1/in situ 58%<br>HR+ 91%<br>Chemotherapy 31%<br>Anthracyclines 25%<br>Received tamoxifen +/- octreotide LAR<br>MA.27<br>Node+ 28%<br>T1/in situ 72%<br>HR+ 100%<br>Chemotherapy 31%<br>Anthracyclines 28% | Weight and height measured at baseline, 1, 3 and 5 years after accrual | Overall survival                 | Baseline BMI 1 y post diagnosis<br>Per 1 log unit | 1.004 (0.998-1.009) |  |
|  |                                                                                              |  |                                                                                                                                                                                                                                  |                                                                        | Overall survival                 | Baseline BMI 3 y post diagnosis                   | 1.028 (0.996-1.062) |  |

|  |                                                                                         |  |                      |                                                                        |                                  |                                                   |                     |  |
|--|-----------------------------------------------------------------------------------------|--|----------------------|------------------------------------------------------------------------|----------------------------------|---------------------------------------------------|---------------------|--|
|  |                                                                                         |  |                      |                                                                        |                                  | Per 1 log unit                                    |                     |  |
|  |                                                                                         |  |                      |                                                                        | Overall survival                 | Baseline BMI 5 y post diagnosis<br>Per 1 log unit | 0.843 (0.387-1.838) |  |
|  |                                                                                         |  |                      |                                                                        | Breast cancer-specific mortality | Baseline BMI 1 y post diagnosis<br>Per 1 log unit | 1.001 (0.992-1.011) |  |
|  |                                                                                         |  |                      |                                                                        | Breast cancer-specific mortality | Baseline BMI 3 y post diagnosis<br>Per 1 log unit | 0.995 (0.934-1.060) |  |
|  |                                                                                         |  |                      |                                                                        | Breast cancer-specific mortality | Baseline BMI 5 y post diagnosis<br>Per 1 log unit | Low events          |  |
|  |                                                                                         |  |                      |                                                                        | Breast cancer-free interval      | Baseline BMI 1 y post diagnosis<br>Per 1 log unit | 0.994 (0.977-1.011) |  |
|  |                                                                                         |  |                      |                                                                        | Breast cancer-free interval      | Baseline BMI 3 y post diagnosis<br>Per 1 log unit | 0.978 (0.946-1.011) |  |
|  |                                                                                         |  |                      |                                                                        | Breast cancer-free interval      | Baseline BMI 5 y post diagnosis<br>Per 1 log unit | 1.104 (0.970-1.258) |  |
|  | Pre- and postmenopausal adjuvant herceptin trials<br>MA.21<br>MA.27<br>HERA<br>(n=1249) |  | Trastuzumab patients | Weight and height measured at baseline, 1, 3 and 5 years after accrual | Overall survival                 | Baseline BMI 1 y post diagnosis<br>Per 1 log unit | 0.992 (0.978-1.007) |  |

|                                                                                                             |                                                                                 |                                                  |                                                                                                                                                                                                                                                                                                                                                                                                                                          |                        |                                         |                                                   |                               |                                                                   |
|-------------------------------------------------------------------------------------------------------------|---------------------------------------------------------------------------------|--------------------------------------------------|------------------------------------------------------------------------------------------------------------------------------------------------------------------------------------------------------------------------------------------------------------------------------------------------------------------------------------------------------------------------------------------------------------------------------------------|------------------------|-----------------------------------------|---------------------------------------------------|-------------------------------|-------------------------------------------------------------------|
|                                                                                                             |                                                                                 |                                                  |                                                                                                                                                                                                                                                                                                                                                                                                                                          |                        | Breast cancer-specific mortality        | Baseline BMI 1 y post diagnosis<br>Per 1 log unit | 1.009 (0.963-1.057)           |                                                                   |
|                                                                                                             |                                                                                 |                                                  |                                                                                                                                                                                                                                                                                                                                                                                                                                          |                        | Breast cancer-free interval             | Baseline BMI 1 y post diagnosis<br>Per 1 log unit | 0.988 (0.959-1.018)           |                                                                   |
| Yue CF, 2017 <sup>381</sup> , Cancer Center of Sun Yat-Sen University (SYSUCC), China<br><br>BMI - Excluded | Female, Retrospective Cohort of Cancer Survivors (n=443) mean age:49.5, Chinese | Diagnosed:2002-2008 follow Up: Average 56 months | Breast cancer. Clinical stage (n): I 93, II 210, III 136, Undetermined 4. ER (n): Negative 55, Positive 385, Unknown 3. PR (n): Negative 72, Positive 368, Unknown 3. HER2 (n): Negative 333, Positive 107, Unknown 3. Triple negative (n): Yes 48, No 392, Unknown 3. Endocrine therapy (n): Yes 338, No 89, Unknown 16. Adjuvant chemotherapy (n): Yes 382, No 50, Unknown 11. Adjuvant radiotherapy (n): Yes 106, No 318, Unknown 19. | Medical records        | Overall survival (n=41)                 | ≥24 vs <24 kg/m <sup>2</sup>                      | 1.01(0.54-1.88)               | Unadjusted                                                        |
|                                                                                                             |                                                                                 |                                                  |                                                                                                                                                                                                                                                                                                                                                                                                                                          |                        | Local relapse-free survival (n=30)      |                                                   | 1.28(0.62-2.62)               |                                                                   |
|                                                                                                             |                                                                                 |                                                  |                                                                                                                                                                                                                                                                                                                                                                                                                                          |                        | Distant metastasis-free survival (n=34) |                                                   | 0.88 (0.44-1.75)              |                                                                   |
| Zhang S, 2017 <sup>382</sup> , China<br><br>BMI - Excluded                                                  | Female, Retrospective Cohort of Cancer Survivors (n=583)                        | Diagnosed:2001-2010 (treatment)                  | Breast cancer AJCC stage I 21%, II 53%, III 26%; ER positive 63%, negative 37%; PR positive 53%, negative 47%; HER2 positive 28%, negative 72% Surgery                                                                                                                                                                                                                                                                                   | Medical records        | Overall survival (n=158)                | High BMI vs Low BMI kg/m <sup>2</sup>             | 2.23(1.09-4.56) P trend=<0.05 | Unadjusted                                                        |
|                                                                                                             |                                                                                 |                                                  |                                                                                                                                                                                                                                                                                                                                                                                                                                          |                        | Disease free survival (n=158)           |                                                   | 1.32(0.70-2.50)               |                                                                   |
| Zhang M, 2017 <sup>214</sup> , Shanghai Breast Cancer                                                       | Prospective cohort study of cancer survivors                                    | 2002-2006<br>Follow up= 10.54 years for          | 5-year disease-free invasive breast cancer survivors                                                                                                                                                                                                                                                                                                                                                                                     | Measured approximately | Late all-cause mortality (n=326)        | ≥26.3 vs 21.88 kg/m <sup>2</sup>                  | 1.10 (0.81 - 1.49)            | Age at diagnosis, ER status, TNM stage, mastectomy, chemotherapy, |

|                                                                                                              |                                                                                                                                                                                                      |                                                                                                              |                                                                                                                                                                                                                |                                                                                                                                                   |                                                                                                                    |                                    |                        |                                                                                                                  |
|--------------------------------------------------------------------------------------------------------------|------------------------------------------------------------------------------------------------------------------------------------------------------------------------------------------------------|--------------------------------------------------------------------------------------------------------------|----------------------------------------------------------------------------------------------------------------------------------------------------------------------------------------------------------------|---------------------------------------------------------------------------------------------------------------------------------------------------|--------------------------------------------------------------------------------------------------------------------|------------------------------------|------------------------|------------------------------------------------------------------------------------------------------------------|
| Survival Study (SBCSS), China,<br><br>BMI - Excluded                                                         | (n= 4062)<br>Pre- and postmenopausal (50.1%)<br><br>Mean age: 53.2 years                                                                                                                             | mortality, 8.4 years for breast cancer recurrence<br><br>326 deaths<br><br>264 breast cancer recurrence      | Stage I 38.1%, IIA 35.3%, IIIB 15.5%, III-IV 6.5%<br><br>ER+ 65.5%, ER- 33.4%<br><br>PR+ 59.3%, PR- 39.3%<br><br>Mastectomy 94.5%<br><br>Chemotherapy 92.3%<br><br>Radiotherapy 30.4%<br><br>Comorbidity 19.2% | 6, 18, 36 and 60 months after diagnosis; treated as time-varying variable                                                                         |                                                                                                                    |                                    |                        | radiotherapy, comorbidity, menopausal status, soy protein, exercise, education                                   |
|                                                                                                              |                                                                                                                                                                                                      |                                                                                                              |                                                                                                                                                                                                                |                                                                                                                                                   | Late breast cancer recurrence (n=264)                                                                              | ≥26.3 vs 21.88 kg/m <sup>2</sup>   | 1.02 (0.73 - 1.42)     |                                                                                                                  |
| Bao, 2016 <sup>42</sup> , SBCSS, China,<br><br>BMI – Included breast cancer molecular subtypes meta-analysis | Prospective cohort study of cancer survivors (n= 518)<br>Pre- and postmenopausal (53.09%)<br>Mean age: 53.4 years<br><br>Recruited approximately 6.5 months after diagnosis<br><br>Response rate 80% | 2002-2006<br><br>Follow up= 9.1 years<br><br>128 deaths<br><br>112 recurrence and disease-specific mortality | Invasive TNBC stage I 30.9%, II 55.6%, III 10.2%, no metastasis<br><br>Mastectomy: 95.6%<br><br>Chemotherapy: 94.4 %<br><br>Radiotherapy: 27.4 %<br><br>Immunotherapy: 17.8 %<br><br>Tamoxifen: 21.6%          | Self-reported weight 1 year prior and at diagnosis;<br><br>measured approximately 6, 18, 36 and 60 months after diagnosis<br><br>BMI at-diagnosis | Interviewed, verified by record linkage with regional vital statistics databases<br><br>All-cause mortality(n=128) | ≥28 vs 18.5-23.9 kg/m <sup>2</sup> | 1.36 (0.78-2.40)       | Age at diagnosis; education; menopausal status; exercise; type of surgery; chemotherapy; radiotherapy; TNM stage |
|                                                                                                              |                                                                                                                                                                                                      |                                                                                                              |                                                                                                                                                                                                                | BMI at-diagnosis                                                                                                                                  | Relapse/disease-specific mortality(n=112)                                                                          | ≥28 vs 18.5-23.9 kg/m <sup>2</sup> | 1.53 (0.84-2.77)       |                                                                                                                  |
| Barba M, 2016 <sup>141</sup> , Italy,<br><br>BMI - Excluded                                                  | Retrospective cohort of cancer survivors (n= 101 )                                                                                                                                                   | 2012-2015<br>Follow up= 12 months                                                                            | Metastatic Breast Cancer<br>73 ER+ cases<br>19 ER- cases                                                                                                                                                       | From records BMI measurements prior to eribulin administration                                                                                    | Total mortality                                                                                                    | ≥25 vs 18.5-24.9 kg/m <sup>2</sup> | P log-rank test = 0.96 | Unadjusted                                                                                                       |

|                                                                                                                                                                               |                                                                                                  |                                                     |                                                                                                                                                                                                                  |                           |                                                     |                               |                   |                                                                                                                                                                      |
|-------------------------------------------------------------------------------------------------------------------------------------------------------------------------------|--------------------------------------------------------------------------------------------------|-----------------------------------------------------|------------------------------------------------------------------------------------------------------------------------------------------------------------------------------------------------------------------|---------------------------|-----------------------------------------------------|-------------------------------|-------------------|----------------------------------------------------------------------------------------------------------------------------------------------------------------------|
|                                                                                                                                                                               | Pre- and postmenopausal<br>Age range: 31-79 years<br>Mean age: 61 years                          |                                                     | 58 PgR+ cases<br>34 PgR- cases                                                                                                                                                                                   |                           | Progression-free survival                           |                               | 1.55 (1.01-2.39)  | ER status                                                                                                                                                            |
| Bergom, 2016 <sup>46</sup> , Medical College of Wisconsin (MCW) United States,<br><br>BMI – Included, meta-analysis                                                           | Retrospective cohort study (n=193) Mean age: 60<br><br>Pre and post-menopausal                   | Follow up= 73 months<br><br>calendar year:1998-2010 | In situ:39 cases<br>Invasive:154 cases<br>T0=20%; T1=60%; T2=17%; T3=2% Of the<br><br>ER+ and/or PR+ 79%<br><br>HER2/Neu+ or HER2/Neu-amplified tumours 17%<br><br>Chemotherapy:33%; Anti-endocrine therapy: 70% | From records at diagnosis | Overall survival invasive breast cancer             | Per 1 kg/m <sup>2</sup>       | 1.12 (1.05 - 1.2) | BMI, Age                                                                                                                                                             |
|                                                                                                                                                                               |                                                                                                  |                                                     |                                                                                                                                                                                                                  |                           | Distant disease free invasive breast cancer         | Per 1 kg/m <sup>2</sup>       | 1.09 (1 - 1.19)   | Tumour size                                                                                                                                                          |
| Brooks JD, 2016 <sup>138</sup> , The Women's Environmental Cancer and Radiation Epidemiology Study (WECARE I & II), Canada, Denmark, USA<br><br>BMI – Included, meta-analysis | Female, Nested Case-control Study (n=3431) mean age:46, Cancer Diagnosis: 1985-2008 Mostly White | Diagnosed:1985-2008                                 | Invasive breast cancer stage I-III                                                                                                                                                                               | Self-reported             | Pre-menopausal Contralateral breast cancer          | >=30 vs <25 kg/m <sup>2</sup> | 0.70(0.30-1.40)   | Age at diagnosis, age at menarche, chemotherapy, er status, family history, histology , hormonal therapy, number of full-term pregnancies, radiotherapy, tumor stage |
|                                                                                                                                                                               |                                                                                                  |                                                     |                                                                                                                                                                                                                  |                           | Post-menopausal Contralateral breast cancer         |                               | 1.00(0.60-1.70)   |                                                                                                                                                                      |
|                                                                                                                                                                               |                                                                                                  |                                                     |                                                                                                                                                                                                                  |                           | Pre- to post-menopausal Contralateral breast cancer |                               | 1.00(0.70-1.50)   |                                                                                                                                                                      |
|                                                                                                                                                                               |                                                                                                  |                                                     |                                                                                                                                                                                                                  |                           | Pre-menopausal, ER+ Contralateral breast cancer     |                               | 0.30(0.06-1.50)   |                                                                                                                                                                      |
|                                                                                                                                                                               |                                                                                                  |                                                     |                                                                                                                                                                                                                  |                           | Pre-menopausal, ER- Contralateral breast cancer     |                               | 1.60(0.50-5.50)   |                                                                                                                                                                      |

|                                                                                                                                                                 |                                                                                                                                                                                                                                                      |                                                                                                                                                                                               |                                                                                                                                                                                                                                                                         |                                                 |                                                          |                              |                                    |  |
|-----------------------------------------------------------------------------------------------------------------------------------------------------------------|------------------------------------------------------------------------------------------------------------------------------------------------------------------------------------------------------------------------------------------------------|-----------------------------------------------------------------------------------------------------------------------------------------------------------------------------------------------|-------------------------------------------------------------------------------------------------------------------------------------------------------------------------------------------------------------------------------------------------------------------------|-------------------------------------------------|----------------------------------------------------------|------------------------------|------------------------------------|--|
|                                                                                                                                                                 |                                                                                                                                                                                                                                                      |                                                                                                                                                                                               |                                                                                                                                                                                                                                                                         |                                                 | Post-menopausal, ER+ Contralateral breast cancer         |                              | 0.90(0.50-1.90)                    |  |
|                                                                                                                                                                 |                                                                                                                                                                                                                                                      |                                                                                                                                                                                               |                                                                                                                                                                                                                                                                         |                                                 | Post-menopausal, ER- Contralateral breast cancer         |                              | 0.80(0.30-2.30)                    |  |
|                                                                                                                                                                 |                                                                                                                                                                                                                                                      |                                                                                                                                                                                               |                                                                                                                                                                                                                                                                         |                                                 | Pre- to post-menopausal, ER+ Contralateral breast cancer |                              | 0.60(0.40-1.00)                    |  |
|                                                                                                                                                                 |                                                                                                                                                                                                                                                      |                                                                                                                                                                                               |                                                                                                                                                                                                                                                                         |                                                 | Pre- to post-menopausal, ER- Contralateral breast cancer |                              | 1.90(1.02-3.40)                    |  |
| Cecchini RS, 2016 <sup>54</sup> , National Surgical Adjuvant Breast and Bowel Project (NSABP) B-30, -31, -34, -38, United States, BMI – Included, meta-analysis | Secondary analysis of clinical trials (n= 15538) (B-30 = 5351, B-31 = 2119; B-34 = 3323; B-38 = 4892)<br><br>Pre- and postmenopausal (status unknown in 80% of B-31 patients)<br><br>Mean age: 49.6 (B-31) to 54.1 (B-34) years<br><br>83%-86% white | 1999-2004<br><br>Follow up=<br>B-30: 9.0 years<br>B-31: 8.3 years<br>B-34: 8.4 years<br>B-38: 5.9 years<br><br>2581 deaths<br>2767 breast cancer recurrence<br>146 patients loss to follow-up | Invasive breast cancer<br>B-30: Node+; Treatment: AC T, AT, or TAC<br><br>B-31: Node+/HER2+; Treatment: AC P or AC PH<br><br>B-34: Early stage, mostly node- and small tumours; Treatment: clodronate or placebo<br><br>B-38: Node+; Treatment: TAC, AC ± P, or AC ± PG | Measured upon entry to adjuvant treatment trial | Overall survival(n=1172)<br>B-30                         | ≥30 vs <25 kg/m <sup>2</sup> | 1.18 (1.02 - 1.35)<br>P trend=0.02 |  |
|                                                                                                                                                                 |                                                                                                                                                                                                                                                      |                                                                                                                                                                                               |                                                                                                                                                                                                                                                                         |                                                 | Overall survival(n=419)<br>B-31                          | ≥30 vs <25 kg/m <sup>2</sup> | 0.94 (0.75 - 1.19)<br>P trend=0.58 |  |
|                                                                                                                                                                 |                                                                                                                                                                                                                                                      |                                                                                                                                                                                               |                                                                                                                                                                                                                                                                         |                                                 | Overall survival(n=375)                                  | ≥30 vs <25 kg/m <sup>2</sup> | 1.03 (0.80 - 1.32)<br>P trend=0.76 |  |



|  |  |  |  |  |                                  |                              |                                      |  |
|--|--|--|--|--|----------------------------------|------------------------------|--------------------------------------|--|
|  |  |  |  |  | B-34                             |                              |                                      |  |
|  |  |  |  |  | Overall survival(n=615)          | ≥30 vs <25 kg/m <sup>2</sup> | 1.11 (0.92 - 1.35)<br>P trend=0.26   |  |
|  |  |  |  |  | B-38                             |                              |                                      |  |
|  |  |  |  |  | Overall survival                 | ≥30 vs <25 kg/m <sup>2</sup> | 1.15 (0.90-1.48)<br>P trend=0.25     |  |
|  |  |  |  |  | B-30                             |                              |                                      |  |
|  |  |  |  |  | AC <sub>0</sub> T                |                              |                                      |  |
|  |  |  |  |  | Overall survival                 | ≥30 vs <25 kg/m <sup>2</sup> | 1.44 (1.12-1.85)<br>P trend=0.005    |  |
|  |  |  |  |  | B-30                             |                              |                                      |  |
|  |  |  |  |  | AT                               |                              |                                      |  |
|  |  |  |  |  | Overall survival                 | ≥30 vs <25 kg/m <sup>2</sup> | 1.02 (0.81-1.29)<br>P trend=0.87     |  |
|  |  |  |  |  | B-30                             |                              |                                      |  |
|  |  |  |  |  | ATC                              |                              |                                      |  |
|  |  |  |  |  | Breast cancer recurrence(n=1201) | ≥30 vs <25 kg/m <sup>2</sup> | 1.17 ( 1.02 - 1.35 )<br>P trend=0.03 |  |
|  |  |  |  |  | B-30                             |                              |                                      |  |
|  |  |  |  |  | Breast cancer recurrence(n=501)  | ≥30 vs <25 kg/m <sup>2</sup> | 1.02 ( 0.83 - 1.26 )<br>P trend=0.91 |  |
|  |  |  |  |  | B-31                             |                              |                                      |  |
|  |  |  |  |  | Breast cancer recurrence(n=324)  | ≥30 vs <25 kg/m <sup>2</sup> | 1.00 ( 0.76 - 1.32 )<br>P trend=0.97 |  |
|  |  |  |  |  | B-34                             |                              |                                      |  |
|  |  |  |  |  | Breast cancer recurrence(n=741)  | ≥30 vs <25 kg/m <sup>2</sup> | 1.13 ( 0.94 - 1.34 )<br>P trend=0.16 |  |
|  |  |  |  |  | B-38                             |                              |                                      |  |
|  |  |  |  |  | Breast cancer recurrence         | ≥30 vs <25 kg/m <sup>2</sup> | 1.17 (0.91-1.50)                     |  |

|                                                                             |                                                                                                                               |                                                                         |                                                                                                                                                                                                                                                                          |                                        |                                                |                                       |                                    |                                                                                                                                                                    |
|-----------------------------------------------------------------------------|-------------------------------------------------------------------------------------------------------------------------------|-------------------------------------------------------------------------|--------------------------------------------------------------------------------------------------------------------------------------------------------------------------------------------------------------------------------------------------------------------------|----------------------------------------|------------------------------------------------|---------------------------------------|------------------------------------|--------------------------------------------------------------------------------------------------------------------------------------------------------------------|
|                                                                             |                                                                                                                               |                                                                         |                                                                                                                                                                                                                                                                          |                                        | B-30<br>AC $\bar{B}$ T                         |                                       | P trend = 0.21                     |                                                                                                                                                                    |
|                                                                             |                                                                                                                               |                                                                         |                                                                                                                                                                                                                                                                          |                                        | Breast cancer recurrence<br>B-30<br>AT         | $\geq 30$ vs $< 25$ kg/m <sup>2</sup> | 1.25 (0.98-1.58)<br>P trend = 0.07 |                                                                                                                                                                    |
|                                                                             |                                                                                                                               |                                                                         |                                                                                                                                                                                                                                                                          |                                        | Breast cancer recurrence<br>B-30<br>ATC        | $\geq 30$ vs $< 25$ kg/m <sup>2</sup> | 1.10 (0.87-1.40)<br>P trend = 0.43 |                                                                                                                                                                    |
| Chen, 2016 <sup>151</sup> , A China,<br><br>BMI – Included, review          | Retrospective cohort study (n= 206 ) mean age:48.5                                                                            | Treatment: 2006-2015<br>Follow up= 59 months<br>Loss to follow up: 1.5% | Invasive TNBC AJCC stage I to III<br>96.1% received an anthracycline- based regimen                                                                                                                                                                                      | From records at baseline               | Disease-free survival(n=52)                    | $> 25$ vs $\leq 25$ kg/m <sup>2</sup> | 1.554 ( 0.885 - 2.728 )            | Nodal status, Tumor stage, Lymphovascular invasion                                                                                                                 |
|                                                                             |                                                                                                                               |                                                                         |                                                                                                                                                                                                                                                                          |                                        | Overall survival(n=38)                         | $> 25$ vs $\leq 25$ kg/m <sup>2</sup> | 1.904 ( 0.976 - 3.713 )            |                                                                                                                                                                    |
| Erbes T, 2016 <sup>66</sup> , Germany,<br><br>BMI – Included, meta-analysis | Retrospective cohort of cancer survivors<br><br>(n= 324 ) Pre and postmenopausal, age range: 24-85 years mean age: 50.6 years |                                                                         | Primary nonmetastatic breast cancer<br><br>Invasive ductal 85.2%, invasive lobular 10.5%, ER+: 62.7%; PR+: 56.8% primary non-metastatic BC g1 3.4%, g2 53.7%, g3 42.9%, HER2/neu + 28.1%, luminal-like 51.5%, HER2/luminal 13.6%, HER2-like 13.0%, Triple-negative 21.9% | Measured prior to chemotherapy         | Overall survival                               | Per 1 unit increase                   | 0.99 (0.92-1.07)                   | Age, histological grade, tumour stage, nodal status, grade, lymph vascular invasion, hormone receptor status, menopausal status, HER-2/neu, triple-negative status |
|                                                                             |                                                                                                                               |                                                                         |                                                                                                                                                                                                                                                                          |                                        | Progression-free                               | Per 1 unit increase                   | 0.98 (0.92-1.04)                   |                                                                                                                                                                    |
| Furlanetto J, 2016 <sup>162</sup> , GAIN,                                   | Secondary analysis of clinical trial (n= 2990)                                                                                | 2004-2008                                                               | Invasive breast cancer                                                                                                                                                                                                                                                   | From records prior to adjuvant therapy | Overall survival<br>Adjusted chemotherapy dose | $\geq 30$ vs $< 30$ kg/m <sup>2</sup> | 1.01 ( 0.78 - 1.41 )               | Age, pT, pN, treatment arm, cyclophosphamide dose                                                                                                                  |

|                                                                               |                                                                                                                                       |                                                                           |                                                                                                                                                                                 |                                     |                                                     |                                |                      |                                                                                   |
|-------------------------------------------------------------------------------|---------------------------------------------------------------------------------------------------------------------------------------|---------------------------------------------------------------------------|---------------------------------------------------------------------------------------------------------------------------------------------------------------------------------|-------------------------------------|-----------------------------------------------------|--------------------------------|----------------------|-----------------------------------------------------------------------------------|
| BMI – Included, review                                                        | Pre- and postmenopausal<br>2435 non-obese<br>382 adjusted BSA<br>173 unadjusted BSA                                                   |                                                                           |                                                                                                                                                                                 |                                     |                                                     |                                |                      |                                                                                   |
|                                                                               |                                                                                                                                       |                                                                           |                                                                                                                                                                                 |                                     | Overall survival<br>Full chemotherapy dose          | ≥ 30 vs <30 kg/m <sup>2</sup>  | 1.23 ( 0.83 - 1.78 ) |                                                                                   |
|                                                                               |                                                                                                                                       |                                                                           |                                                                                                                                                                                 |                                     | Disease-free survival<br>Adjusted chemotherapy dose | ≥ 30 vs <30 kg/m <sup>2</sup>  | 1.01 ( 0.81 - 1.31 ) |                                                                                   |
|                                                                               |                                                                                                                                       |                                                                           |                                                                                                                                                                                 |                                     | Disease-free survival<br>Full chemotherapy dose     | ≥ 30 vs <30 kg/m <sup>2</sup>  | 0.95 ( 0.68 - 1.31 ) |                                                                                   |
| Gennari A, 2016 <sup>164</sup> , IBIS 3, Italy,<br><br>BMI – Included, review | Secondary analysis of clinical trial (n= 959 )<br>Pre- and postmenopausal<br>Age range: 26-70 years<br>Mean age:52 years<br>High risk | 1997-2004<br>Follow-up: 103 months<br>139 deaths, 267 disease-free events | Invasive breast cancer<br>ER+/HER2- 405 cases,<br>ER+/HER2+ 117 cases,<br>ER-/HER2- 215 cases,<br>ER-/HER2+ 77cases<br>Tumor size ≥ 2cm 415 cases<br>Hormonal therapy 415 cases | From records, prior to chemotherapy | Overall survival                                    | ≥ 30 vs < 25 kg/m <sup>2</sup> | 1.12 ( 0.7 - 1.81 )  | Tumor size, hormonal receptor status, HER2 status , Nodal status, chemotherapy, , |
|                                                                               |                                                                                                                                       |                                                                           |                                                                                                                                                                                 |                                     | Overall survival pre-menopausal                     | ≥ 30 vs < 25 kg/m <sup>2</sup> | 1.33 ( 0.64 - 2.78 ) |                                                                                   |
|                                                                               |                                                                                                                                       |                                                                           |                                                                                                                                                                                 |                                     | Overall survival post-menopausal                    | ≥ 30 vs < 25 kg/m <sup>2</sup> | 1.02 ( 0.59 - 1.78 ) |                                                                                   |
|                                                                               |                                                                                                                                       |                                                                           |                                                                                                                                                                                 |                                     | Disease-free survival                               | ≥ 30 vs < 25 kg/m <sup>2</sup> | 1.1 ( 0.77 - 1.57 )  |                                                                                   |
|                                                                               |                                                                                                                                       |                                                                           |                                                                                                                                                                                 |                                     | Disease-free survival pre-menopausal                | ≥ 30 vs < 25 kg/m <sup>2</sup> | 1.02 ( 0.57 - 1.81 ) |                                                                                   |
|                                                                               |                                                                                                                                       |                                                                           |                                                                                                                                                                                 |                                     | Disease-free survival post-menopausal               | ≥ 30 vs < 25 kg/m <sup>2</sup> | 1.18 ( 0.78 - 1.77 ) |                                                                                   |

|                                                                      |                                                                                                                  |                                                                                          |                                                                                                                                                                                                                                       |                                    |                                             |                                    |                                           |                                                                                                                                                                                         |
|----------------------------------------------------------------------|------------------------------------------------------------------------------------------------------------------|------------------------------------------------------------------------------------------|---------------------------------------------------------------------------------------------------------------------------------------------------------------------------------------------------------------------------------------|------------------------------------|---------------------------------------------|------------------------------------|-------------------------------------------|-----------------------------------------------------------------------------------------------------------------------------------------------------------------------------------------|
| Hyun, 2016 <sup>296</sup> ,<br>Korea,<br><br>BMI - Excluded          | Retrospective cohort study (n= 332 )<br>Pre and post-menopausal<br>Mean age:46.1 years                           | Treatment: 2006-2012<br>Follow up= 39 months<br>15 breast cancer deaths<br>76 recurrence | Invasive breast cancer<br>Clinical stage I 8.1%, II 33.4%, III 58.4%<br>ER+ 62.7%, ER- 37.3%<br>PR+ 56.6%, PR- 43.4%<br>HER2+ 25%, HER2- 75%<br>Neoadjuvant therapy: 60.2%                                                            | measured at the time of PET/CT.    | Recurrence-free (n= 76)                     | Overweight vs Normal weight        | 1.84 ( 1.17 - 2.89 )                      | clinical stage, Tumor stage,                                                                                                                                                            |
| Jeon SJ, 2016 <sup>298</sup> ,<br>South Korea,<br><br>BMI - Excluded | Retrospective cohort of cancer survivors (n= 249 )<br>Premenopausal<br>Age range: 26-55 years, Mean age:44 years | Treatment: 2007-2013<br>Follow up= 64 months                                             | Invasive breast cancer<br>Stage 1 39%, 2 49.8%, 3 11.2%<br>ER+ 83.5%, PR+ 67.5%,<br>Tumour size: ≥2cm 61.8%<br>Adjuvant/neoadjuvant chemo: anthracycline-based 86.7%, taxane-containing 6.8%, CMF 6.4%, adjuvant hormonal therapy 88% | From records                       | Disease-free survival                       | ≥23 vs <23 kg/m <sup>2</sup>       | 0.2 ( 0.021 - 1.174 )                     |                                                                                                                                                                                         |
| Kawai, 2016 <sup>301</sup> ,<br>Japan,<br><br>BMI - Excluded         | Prospective cohort study (n= 20,090)<br>Pre and post-menopausal<br>Mean age:57.3 years                           | 2004-2006<br>Follow up= 6.7 years                                                        | Invasive breast cancer<br>Tumor stage I:8304 cases,<br>IIA-B 9841 cases, IIIA-C 1945 cases<br>Luminal A: 9850 cases,<br>Luminal B: 3988 cases,<br>HER2: 1485 cases,<br>TNBC:2993 cases                                                | From records, timing not specified | all-cause mortality(n=1418)                 | ≥30 vs 18.5-21.8 kg/m <sup>2</sup> | 1.46 ( 1.16 - 1.83 )<br><br>P trend=0.026 | Age, residence, Detection type, family history of breast cancer, Tumor stage, radiation therapy, chemotherapy, endocrine therapy, Tumor subtype, menopausal status, year of recruitment |
|                                                                      |                                                                                                                  |                                                                                          |                                                                                                                                                                                                                                       |                                    | all-cause mortality(n=332) pre-menopausal   | ≥30 vs 18.5-21.8 kg/m <sup>2</sup> | 1.46 ( 0.91 - 2.35 )<br><br>P trend=0.21  |                                                                                                                                                                                         |
|                                                                      |                                                                                                                  |                                                                                          |                                                                                                                                                                                                                                       |                                    | all-cause mortality(n=1013) post-menopausal | ≥30 vs 18.5-21.8 kg/m <sup>2</sup> | 1.47 ( 1.13 - 1.92 )<br><br>P trend=0.11  |                                                                                                                                                                                         |
|                                                                      |                                                                                                                  |                                                                                          |                                                                                                                                                                                                                                       |                                    | Breast cancer-specific mortality(n=937)     | ≥30 vs 18.5-21.8 kg/m <sup>2</sup> | 1.47 ( 1.11 - 1.93 )<br><br>P trend=0.067 |                                                                                                                                                                                         |

|  |  |  |  |                                                         |                                    |                                       |  |
|--|--|--|--|---------------------------------------------------------|------------------------------------|---------------------------------------|--|
|  |  |  |  | Breast cancer-specific mortality(n=296) pre-menopausal  | ≥30 vs 18.5-21.8 kg/m <sup>2</sup> | 1.34 ( 0.79 - 2.27 )<br>P trend=0.39  |  |
|  |  |  |  | Breast cancer-specific mortality(n=607) post-menopausal | ≥30 vs 18.5-21.8 kg/m <sup>2</sup> | 1.58 ( 1.13 - 2.2 )<br>P trend=0.11   |  |
|  |  |  |  | Breast cancer-specific mortality(n=183) Luminal A       | ≥30 vs 18.5-21.8 kg/m <sup>2</sup> | 1.64 ( 0.93 - 2.9 )<br>P trend=0.075  |  |
|  |  |  |  | Breast cancer-specific mortality(n=186) Luminal B       | ≥30 vs 18.5-21.8 kg/m <sup>2</sup> | 2.59 ( 1.51 - 4.43 )<br>P trend=0.017 |  |
|  |  |  |  | Breast cancer-specific mortality(n=371) Triple-negative | ≥30 vs 18.5-21.8 kg/m <sup>2</sup> | 1.11 ( 0.67 - 1.84 )<br>P trend=0.65  |  |
|  |  |  |  | Breast cancer-specific mortality(n=125) HER2            | ≥30 vs 18.5-21.8 kg/m <sup>2</sup> | 1.53 ( 0.68 - 3.42 )<br>P trend=0.097 |  |
|  |  |  |  | recurrence(n=2433)                                      | ≥30 vs 18.5-21.8 kg/m <sup>2</sup> | 1.15 ( 0.95 - 1.39 )<br>P trend=0.6   |  |
|  |  |  |  | recurrence(n=817) pre-menopausal                        | ≥30 vs 18.5-21.8 kg/m <sup>2</sup> | 1.21 ( 0.85 - 1.71 )<br>P trend=0.71  |  |
|  |  |  |  | recurrence(n=1520) post-menopausal                      | ≥30 vs 18.5-21.8 kg/m <sup>2</sup> | 1.15 ( 0.92 - 1.46 )<br>P trend=0.82  |  |
|  |  |  |  | recurrence(n=765) Luminal A                             | ≥30 vs 18.5-21.8 kg/m <sup>2</sup> | 1.23 ( 0.9 - 1.68 )<br>P trend=0.25   |  |
|  |  |  |  | recurrence(n=555) Luminal B                             | ≥30 vs 18.5-21.8 kg/m <sup>2</sup> | 1.16 ( 0.77 - 1.75 )<br>P trend=0.68  |  |
|  |  |  |  | recurrence(n=623) Triple-negative                       | ≥30 vs 18.5-21.8 kg/m <sup>2</sup> | 1.09 ( 0.74 - 1.62 )<br>P trend=0.97  |  |

|                                                                                                                                                                                                                                                                                                   |                                                                                                                                                                                                                                                                                          |                                                                                                                                                                                                             |                                                                                                                                                                                                                        |                                                                                                                                                           |                                                                                                                                                                                           |                                     |                                           |                                                                                                                                                                                                                                                                                                       |
|---------------------------------------------------------------------------------------------------------------------------------------------------------------------------------------------------------------------------------------------------------------------------------------------------|------------------------------------------------------------------------------------------------------------------------------------------------------------------------------------------------------------------------------------------------------------------------------------------|-------------------------------------------------------------------------------------------------------------------------------------------------------------------------------------------------------------|------------------------------------------------------------------------------------------------------------------------------------------------------------------------------------------------------------------------|-----------------------------------------------------------------------------------------------------------------------------------------------------------|-------------------------------------------------------------------------------------------------------------------------------------------------------------------------------------------|-------------------------------------|-------------------------------------------|-------------------------------------------------------------------------------------------------------------------------------------------------------------------------------------------------------------------------------------------------------------------------------------------------------|
|                                                                                                                                                                                                                                                                                                   |                                                                                                                                                                                                                                                                                          |                                                                                                                                                                                                             |                                                                                                                                                                                                                        |                                                                                                                                                           | recurrence(n=309 ) HER2                                                                                                                                                                   | ≥30 vs 18.5-21.8 kg/m <sup>2</sup>  | 1.24 ( 0.68 - 2.26 )<br>P trend=0.32      |                                                                                                                                                                                                                                                                                                       |
| Kobayashi, 2016 <sup>176</sup> , Japan,<br><br>BMI – Included, review                                                                                                                                                                                                                             | Retrospective cohort study (n= 157 )<br>Pre and post-menopausal<br>Mean age:56 years                                                                                                                                                                                                     | Treatment: 2011-2013<br>Follow up= 43.4 weeks                                                                                                                                                               | Metastatic breast cancer<br>Total mastectomy 101/157 (64%); breast-conserving surgery 35/157 (22%); bilateral surgery 6/157 (4%); No surgery: 15/157 (9%)                                                              | From records                                                                                                                                              | all-cause mortality without liver metastasis                                                                                                                                              | >25 vs ≤25 kg/m <sup>2</sup>        | 1.22 ( 0.71 - 2.07 )<br><br>P =0.47       | Multivariable adjusted                                                                                                                                                                                                                                                                                |
|                                                                                                                                                                                                                                                                                                   |                                                                                                                                                                                                                                                                                          |                                                                                                                                                                                                             |                                                                                                                                                                                                                        |                                                                                                                                                           | all-cause mortality without liver metastasis                                                                                                                                              | >25 vs ≤25 kg/m <sup>2</sup>        | 0.86 ( 0.38 - 1.93 )<br><br>P =0.71       |                                                                                                                                                                                                                                                                                                       |
| Nechuta S, 2016 <sup>27</sup> , After Breast Cancer Pooling Project (ABCPP) (Women's Healthy Eating and Living (WHEL), Life After Cancer Epidemiology (LACE), Nurses' Health Study (NHS), United States<br><br>BMI - Included in molecular breast cancer subtype and non-linear DFS meta-analyses | Pooled analysis (prospective studies) (final n= 5675 in recurrence analysis; 6596 in mortality analysis)<br>Pre- and postmenopausal (72.9%)<br>Mean age: 59.4 years<br>Excluded 921 and 599 women due to event/loss to follow-up prior to 5 years after diagnosis in respective analysis | 1976–2004<br>Follow up= 12 years for mortality, 10.6 years for recurrence<br>1427 deaths<br>49% of breast cancer deaths, 17% other cancers deaths, 13% CVD deaths, 21% from other causes<br>1309 recurrence | 5-year disease free (survived average 2 years) invasive ER+ breast cancer<br>Stage I 53.2%, II 35.7%, III 11.1%<br>PR+ 81.9%<br>Mastectomy 48.6%<br>Chemotherapy 46.2%<br>Radiotherapy 61.6%<br>Hormonal therapy 86.3% | Measured/self-reported, average 2.1 years after diagnosis for 1st assessment and 4.6 years for 2nd weight assessment<br><br>BMI at 2 years post-diagnosis | Mortality information via medical and death records linkages. Self-reported breast cancer outcomes, confirmed by medical records (WHEL, LACE)<br><br>Early all-cause mortality (<5 years) | ≥35 vs 21.5-24.99 kg/m <sup>2</sup> | 1.22 ( 0.74 - 2.03 )                      | Age at diagnosis, TNM stage, PR status, chemotherapy, radiotherapy, surgery, hormonal therapy, race/ethnicity, menopausal status, comorbidity, time between exposure measurement and 5-year post-diagnosis date, stratified by study, weight change, exercise, alcohol intake, smoking as appropriate |
|                                                                                                                                                                                                                                                                                                   |                                                                                                                                                                                                                                                                                          |                                                                                                                                                                                                             |                                                                                                                                                                                                                        | BMI at 2 years post-diagnosis                                                                                                                             | Late all-cause mortality (≥5 years) (n=1209)                                                                                                                                              | ≥35 vs 21.5-24.99 kg/m <sup>2</sup> | 1.37 ( 0.93 - 2.01 )<br><br>P trend=0.19  |                                                                                                                                                                                                                                                                                                       |
|                                                                                                                                                                                                                                                                                                   |                                                                                                                                                                                                                                                                                          |                                                                                                                                                                                                             |                                                                                                                                                                                                                        | BMI at 4.6 years post-diagnosis                                                                                                                           | Late all-cause mortality (≥5 years) (n=962)                                                                                                                                               | ≥35 vs 21.5-24.99 kg/m <sup>2</sup> | 1.40 ( 1.09 - 1.81 )<br><br>P trend=0.013 |                                                                                                                                                                                                                                                                                                       |

|                                                                                                                                                                                                                                      |                                                                                                                               |                                                                       |                                                                                        |                                                      |                                                                                                       |                                     |                                        |                                                                                                        |
|--------------------------------------------------------------------------------------------------------------------------------------------------------------------------------------------------------------------------------------|-------------------------------------------------------------------------------------------------------------------------------|-----------------------------------------------------------------------|----------------------------------------------------------------------------------------|------------------------------------------------------|-------------------------------------------------------------------------------------------------------|-------------------------------------|----------------------------------------|--------------------------------------------------------------------------------------------------------|
|                                                                                                                                                                                                                                      |                                                                                                                               |                                                                       |                                                                                        | BMI at 2 years post-diagnosis                        | Early recurrence (<5 years)                                                                           | ≥35 vs 21.5-24.99 kg/m <sup>2</sup> | 1.06 ( 0.50 - 2.25 )                   |                                                                                                        |
|                                                                                                                                                                                                                                      |                                                                                                                               |                                                                       |                                                                                        | BMI at 2 years post-diagnosis                        | Late recurrence (≥5 years) (n=604)                                                                    | ≥35 vs 21.5-24.99 kg/m <sup>2</sup> | 1.41 ( 1.02 - 1.93 )<br>P trend=0.007  |                                                                                                        |
|                                                                                                                                                                                                                                      |                                                                                                                               |                                                                       |                                                                                        | BMI at 4.6 years post-diagnosis                      | Late recurrence (≥5 years) (n=510)                                                                    | ≥35 vs 21.5-24.99 kg/m <sup>2</sup> | 1.65 ( 1.16 - 2.32 )<br>P trend=0.0003 |                                                                                                        |
| Nelson SH, 2016 <sup>98</sup> , After Breast Cancer Pooling Project (ABCP) (Women's Healthy Eating and Living (WHEL), Life After Cancer Epidemiology (LACE), Nurses' Health Study (NHS), United States BMI – Included, meta-analysis | Pooled analysis (prospective studies) (n= 9513) Pre- and postmenopausal (72.6%) Mean age: 59 years Non-Hispanic white: 88.6 % | 1976-2006 Follow up= 11.8 years 2212 deaths 1131 breast cancer deaths | Invasive breast cancer Stage I (51.4%), II, III                                        | Measured/self reported mean 1.4 years post-diagnosis | Medical records, or self-reported and verified by medical records<br><br>All-cause mortality (n=2212) | ≥35 vs 18.5-24.9 kg/m <sup>2</sup>  | 1.05 (0.88 - 1.24)                     | Age at diagnosis, race, stage, grade, ER status, chemotherapy, smoking, comorbidity, physical activity |
|                                                                                                                                                                                                                                      |                                                                                                                               |                                                                       |                                                                                        |                                                      | Breast cancer-specific mortality (n=1131)                                                             | ≥35 vs 18.5-24.9 kg/m <sup>2</sup>  | 0.95 (0.74 - 1.20)                     |                                                                                                        |
| Sendur, 2016 <sup>332</sup> , Turkey<br><br>BMI - Excluded                                                                                                                                                                           | Retrospective cohort study (n= 826) Premenopausal Mean age 57 years                                                           | 1998-2014 Follow up= 37.5 months                                      | Non-metastatic HR+ breast cancer using tamoxifen                                       | Medical records                                      | Overall survival                                                                                      | ≥25 vs <25 kg/m <sup>2</sup>        | Log-rank P = 0.028                     | Unadjusted                                                                                             |
|                                                                                                                                                                                                                                      |                                                                                                                               |                                                                       |                                                                                        |                                                      | Disease-free survival                                                                                 |                                     | Log-rank P = 0.39                      |                                                                                                        |
| Sestak, 2016 <sup>333</sup> , Arimidex, Tamoxifen Alone or in Combination (ATAC), International<br><br>BMI - Excluded                                                                                                                | Secondary analysis of clinical trial (n= 940 ) Postmenopausal Mean age:63.6 years                                             | Follow up= 10 years 142 recurrences                                   | Invasive HR+ breast cancer Hysterectomy 22.1 %; Radiotherapy 68.0 %; Mastectomy 41.5 % | No description                                       | Distant recurrence(n=142 )                                                                            | Per 1 SD                            | 1.12 ( 0.9 - 1.38 )                    |                                                                                                        |

|                                                                                                    |                                                                                                                                                 |                                       |                                                                                                                                                                                                              |                                          |                                                    |                                                                                            |                                                                              |                                                                                                                                                                                                                                                 |
|----------------------------------------------------------------------------------------------------|-------------------------------------------------------------------------------------------------------------------------------------------------|---------------------------------------|--------------------------------------------------------------------------------------------------------------------------------------------------------------------------------------------------------------|------------------------------------------|----------------------------------------------------|--------------------------------------------------------------------------------------------|------------------------------------------------------------------------------|-------------------------------------------------------------------------------------------------------------------------------------------------------------------------------------------------------------------------------------------------|
| Slaoui, 2016 <sup>337</sup> ,<br>National Institute<br>of Oncology<br>Rabat,<br><br>BMI - Excluded | Retrospective<br>cohort study (n=<br>716 )<br>Pre and post-<br>menopausal                                                                       | 2009-2014<br>Follow up= 31<br>months  | TNBC 16.8%<br>NO 40%                                                                                                                                                                                         | From records                             | Event free survival<br>age                         | yes vs no                                                                                  | 1.11 ( 0.32 - 3.81 )                                                         | Unadjusted                                                                                                                                                                                                                                      |
|                                                                                                    |                                                                                                                                                 |                                       |                                                                                                                                                                                                              |                                          | Event free survival<br>age > 40y                   | yes vs no                                                                                  | 1.15 ( 0.58 - 2.3 )                                                          | Unadjusted                                                                                                                                                                                                                                      |
| Su Y, 2016 <sup>340</sup> ,<br>SBCS, China,<br><br>BMI - Excluded                                  | Follow-up of<br>cases in case-<br>control study<br>(n= 535 )<br>Pre and<br>postmenopausal<br>Age range: 20-70<br>years, Mean age:<br>51.4 years | 2002-2005<br>Follow up=               | Invasive breast cancer<br>TNM stage 0 2.4%, stage<br>1 31.9%, 2a 32.9%, 2b<br>21.6%, 3 10.5%, 4 0.7%<br>ER+ 62.7%<br>PR+ 61.4%<br>HER2+ 30.4%<br>Chemotherapy 94.4%<br>Radiotherapy 32.1%<br>Tamoxifen 54.2% | Measured, 6<br>months after<br>diagnosis | Overall survival                                   | pSmad2 intensity x<br>BMI<br><br>TGFβ-RII intensity x<br>BMI<br><br>TGFβ-RII pattern x BMI | P interaction <0.001<br><br>P interaction = 0.24<br><br>P interaction = 0.88 | Age at diagnosis, tumor<br>size, grade, tumor-<br>node-metastasis stage,<br>estrogen receptor α,<br>progesterone receptor,<br>human epidermal<br>growth factor receptor<br>2, radiotherapy,<br>chemotherapy,<br>immunotherapy, and<br>tamoxifen |
|                                                                                                    |                                                                                                                                                 |                                       |                                                                                                                                                                                                              |                                          | Disease-free<br>survival                           | pSmad2 intensity x<br>BMI<br><br>TGFβ-RII intensity x<br>BMI<br><br>TGFβ-RII pattern x BMI | P interaction <0.02<br><br>P interaction = 0.64<br><br>P interaction = 0.92  |                                                                                                                                                                                                                                                 |
| Tamura, 2016 <sup>343</sup> ,<br>Japan,<br><br>BMI - Excluded                                      | Retrospective<br>cohort study (n=<br>301 )<br>Pre and post-<br>menopausal<br>Mean age:50<br>years                                               | 1993-2008<br>Follow up= 5.77<br>years | DCIS<br>HR+ 79%<br>HR- 21%<br>HER2 0/1+ 81%<br>HER2 2/3+ 19%<br>Total mastectomy 59%<br>Lumpectomy 41%                                                                                                       | From records                             | Ipsilateral breast<br>tumor recurrence<br>(IBTR)   | ≥22 vs <22 kg/m <sup>2</sup>                                                               | P = 0.26                                                                     | Unadjusted                                                                                                                                                                                                                                      |
|                                                                                                    |                                                                                                                                                 |                                       |                                                                                                                                                                                                              |                                          | Contralateral<br>breast tumor<br>recurrence (CBTR) | ≥22 vs <22 kg/m <sup>2</sup>                                                               | P = 0.14                                                                     | Unadjusted                                                                                                                                                                                                                                      |



|                                                                                                                |                                                                                                                             |                                                                                                                       |                                                                                     |                                                                       |                                                        |                                |                       |                                                                                                                                                          |
|----------------------------------------------------------------------------------------------------------------|-----------------------------------------------------------------------------------------------------------------------------|-----------------------------------------------------------------------------------------------------------------------|-------------------------------------------------------------------------------------|-----------------------------------------------------------------------|--------------------------------------------------------|--------------------------------|-----------------------|----------------------------------------------------------------------------------------------------------------------------------------------------------|
| Tomiguchi, 2016 <sup>205</sup> , Japan,<br><br>BMI – Included, review                                          | Retrospective cohort study (n=307)<br>Pre- and post-menopausal                                                              | Treatment: 2000-2011 Follow up= 65 months                                                                             | Invasive HR+/HER2- breast cancer<br>Chemotherapy 25.4%<br>Endocrine therapy 93.5%   | No description                                                        | Breast cancer-specific mortality(n=8)<br>ER+ and HER2- | ≥23 vs <23 kg/m <sup>2</sup>   | 4.56 ( 0.82 - 40.62 ) | Age, menopausal status, Tumor size, Ki-67 expression, Nodal status, FGFR1 amplification, FGFR1 mRNA expression, Nuclear grade, FGFR1 protein expression  |
|                                                                                                                |                                                                                                                             |                                                                                                                       |                                                                                     |                                                                       | Relapse-free(n=21) ER+ and HER2-                       | ≥23 vs <23 kg/m <sup>2</sup>   | 1.25 ( 0.48 - 3.29 )  |                                                                                                                                                          |
| Warren LE, 2016 <sup>115</sup> , Dana-Farber Cancer Institute (DFCI), USA<br><br>BMI – Included, meta-analysis | Retrospective cohort of cancer survivors (n= 878 ) Pre- and postmenopausal<br><br>Age range: 23-87 years mean age: 55 years | Treatment between 1997 and 2007<br><br>Follow up= 10.8 years<br><br>45 locoregional recurrence 103 CBC, DM, or deaths | Invasive breast cancer<br>Adjuvant hormonal therapy 76% Adjuvant chemotherapy 44.3% | From records<br>Adult height and weight within a year after diagnosis | Disease-free survival                                  | ≥ 30 vs < 25 kg/m <sup>2</sup> | 1.44 ( 0.97 - 2.14 )  | Unadjusted                                                                                                                                               |
|                                                                                                                |                                                                                                                             |                                                                                                                       |                                                                                     |                                                                       | Disease-free survival pre-menopausal                   | ≥ 30 vs < 25 kg/m <sup>2</sup> | 2.86 (1.45 - 5.67)    | Age, year of diagnosis from 1997, tumour grade, margin status, subtype, pT stage, no. of positive nodes, adjuvant hormone therapy, adjuvant chemotherapy |
|                                                                                                                |                                                                                                                             |                                                                                                                       |                                                                                     |                                                                       | Disease-free survival post-menopausal                  | ≥ 30 vs < 25 kg/m <sup>2</sup> | 0.79 (0.44 - 1.43)    |                                                                                                                                                          |
|                                                                                                                |                                                                                                                             |                                                                                                                       |                                                                                     |                                                                       | Locoregional recurrence                                | ≥ 30 vs < 25 kg/m <sup>2</sup> | 1.1 (0.48 - 2.11 )    | Unadjusted                                                                                                                                               |

|                                                                  |                                                          |                                                              |                                                                                                                                                                                                                                                                      |                 |                                                |                                 |                         |                                                                                                                                                                    |
|------------------------------------------------------------------|----------------------------------------------------------|--------------------------------------------------------------|----------------------------------------------------------------------------------------------------------------------------------------------------------------------------------------------------------------------------------------------------------------------|-----------------|------------------------------------------------|---------------------------------|-------------------------|--------------------------------------------------------------------------------------------------------------------------------------------------------------------|
|                                                                  |                                                          |                                                              |                                                                                                                                                                                                                                                                      |                 | Locoregional recurrence(n=23) pre-menopausal   | ≥ 30 vs < 25 kg/m <sup>2</sup>  | 3.36 ( 1.07 - 10.63 )   | Age, year of diagnosis from 1997, tumour grade, subtype, pT stage, lymphovascular invasion, no. of positive nodes, adjuvant hormone therapy, adjuvant chemotherapy |
|                                                                  |                                                          |                                                              |                                                                                                                                                                                                                                                                      |                 | Locoregional recurrence (n=32) post-menopausal | ≥ 30 vs < 25 kg/m <sup>2</sup>  | 0.52 ( 0.15 - 1.83 )    |                                                                                                                                                                    |
| Wu, 2016 <sup>209</sup> ,<br>China,<br>BMI – Included,<br>review | Retrospective cohort study (n= 122 ) Mean age:50.5 years | 2009-2014<br>Follow up= 31 months<br>calendar year:2009-2014 | Invasive breast cancer with first-episode liver metastasis<br>AJCC v.7 I: 3, II: 29, III:56; IV 34 cases<br>Luminal A 12, B 61, HER2+ 30, TNBC 19 cases<br>Surgery:106<br>Chemotherapy: 95<br>Radiotherapy: 57<br>Hormonal therapy: 58<br>Targeted therapy: 21 cases | Medical records | Total mortality(n=84)                          | ≥28 vs <28                      | 2.239 ( 1.034 - 4.847 ) | Tumour subtype (luminal, HER2, TNBC), cTNM stage, lactate dehydrogenase level at relapse, radiotherapy, targeted therapy, chemotherapy                             |
| Zhou, 2016 <sup>352</sup> ,<br>China,<br>BMI - Excluded          | Retrospective cohort study (n= 732 ) mean age:51 years   | Treatment: 2007-2011<br>Follow up= 41 months                 | Invasive and in situ HER2+ breast cancer<br>HR+ 55.5%<br>HR- 44.5%<br>DCIS 2.9%<br>Stage I 24.5%, II 58.3%, III 14.2%<br>Neoadjuvant chemotherapy treatment: 19.4%<br>Chemotherapy: 12.8%<br>Radiotherapy: 41.7%<br>Endocrine therapy: 51.6%                         | At diagnosis    | Overall survival                               | ≥18.49 vs ≤24 kg/m <sup>2</sup> | 0.851 ( 0.112 - 6.473 ) | Unadjusted                                                                                                                                                         |

|                                                                                                                                                                                     |                                                                                                                              |                                                                |                                                                                                                                                                                                                                                                                                                                                                                        |                             |                                                                             |                                     |                                                    |                                                                                                                                                                      |
|-------------------------------------------------------------------------------------------------------------------------------------------------------------------------------------|------------------------------------------------------------------------------------------------------------------------------|----------------------------------------------------------------|----------------------------------------------------------------------------------------------------------------------------------------------------------------------------------------------------------------------------------------------------------------------------------------------------------------------------------------------------------------------------------------|-----------------------------|-----------------------------------------------------------------------------|-------------------------------------|----------------------------------------------------|----------------------------------------------------------------------------------------------------------------------------------------------------------------------|
|                                                                                                                                                                                     |                                                                                                                              |                                                                |                                                                                                                                                                                                                                                                                                                                                                                        |                             | Disease-free survival                                                       | ≥18.49 vs ≤24 kg/m <sup>2</sup>     | 1.18 ( 0.422 - 3.298 )                             | Unadjusted                                                                                                                                                           |
| Al Saeed, 2015 <sup>259</sup> , Saudi Arabia<br><br>BMI - Excluded                                                                                                                  | Retrospective cohort study (n= 112 )<br>Pre and post-menopausal<br>Mean age: 47 years<br>Included 2 male breast cancer cases | Treatment: 1988-2008<br>Follow up= 9 years                     | Invasive breast cancer                                                                                                                                                                                                                                                                                                                                                                 | Measured at time of surgery | Locoregional recurrence(n=10)                                               | 26-30 vs 18.5 -25 kg/m <sup>2</sup> | 3.4 (3.0-3.8)                                      |                                                                                                                                                                      |
| Bonsang-Kitzis , 2015 <sup>144</sup> ,<br><br>BMI – Included, review                                                                                                                | (n= 326 ) mean age:47                                                                                                        | Follow up= 52 months                                           | T1:9% T2: 65% T3: 26%<br>All patients received NAC followed by surgery with or without radiotherapy.                                                                                                                                                                                                                                                                                   |                             | Metastasis                                                                  | >30 vs ≤30 kg/m <sup>2</sup>        | 1.71 ( 0.92 - 3.21 )<br><br>P =0.09                | Tumour size, pre and post-treatment lymph node, post-treatment tumour                                                                                                |
| Bao PP, 2015 <sup>396</sup> , Shanghai Breast Cancer Study (SBCS), Shanghai Breast Cancer Survival Study (SBCSS), Shanghai Womens' Health Study (SWHS), China<br><br>BMI - Excluded | Female, Pooled Analysis Cohorts (n=6346) Chinese                                                                             | Follow Up: Median 8.08 years , Loss to Follow-up: Not reported | Breast cancer. TNM stage (n) 0-I 2,111, II 3,088, III-IV 633, unknown 514. ER+ 3,745, ER- 2,035, unknown 566. PR+ 3,431, PR- 2,334, unknown 581. ER+/PR+ 2,978, ER-/PR- 1,581, ER+/PR- or ER-PR+ 1,195, unknown 592. Radical mastectomy (n) yes 6,276, no 30, unknown 40. Chemotherapy yes 5,761, no 540, unknown 45. Radiotherapy yes 1,943, no 4,212, unknown 191. Tamoxifen use yes | Self-reported               | 5-year overall survival (n=1207.0)<br><br>5y disease free survival (n=1160) | Q2 vs Q1                            | 85.98 vs 89.39 P<0.01<br><br>80.63 vs 84.84 P=0.01 | Age at diagnosis, age at menarche, chemotherapy, ER status, family history, histology , hormonal therapy, number of full-term pregnancies, radiotherapy, tumor stage |

|                                                                                                                                                     |                                                                              |                                                        |                                                                                                                                                                                         |                                                  |                                  |                              |                         |                                                                             |
|-----------------------------------------------------------------------------------------------------------------------------------------------------|------------------------------------------------------------------------------|--------------------------------------------------------|-----------------------------------------------------------------------------------------------------------------------------------------------------------------------------------------|--------------------------------------------------|----------------------------------|------------------------------|-------------------------|-----------------------------------------------------------------------------|
|                                                                                                                                                     |                                                                              |                                                        | 3,009, no 2,387, unknown 950.                                                                                                                                                           |                                                  |                                  |                              |                         |                                                                             |
| Cakar, 2015 <sup>277</sup> , Ege University Medical Oncology Clinic, Turkey, BMI - Excluded                                                         | Prospective cohort study (n=112) Pre and Post-menopausal Mean age:50.4 years | Diagnosis year: 2004-2009 Follow up= 23.2 months       | Triple negative breast cancer IDC 63.4%, ILC 0.9%, IDC+ILC 8%, inflammatory 2.7%, other 25% Anthracycline 43.8% Taxane 3.6% Anthracycline + taxane 43.8%, Neoadjuvant chemotherapy 7.1% | Assessed at time of diagnosis                    | Overall survival(n=6)            | Obese vs Normal/underweight  | P log-rank test = 0.304 | Unadjusted                                                                  |
|                                                                                                                                                     |                                                                              |                                                        |                                                                                                                                                                                         |                                                  | Disease-free survival(n=12)      | Obese vs Normal/underweight  | P log-rank test = 0.16  | Unadjusted                                                                  |
| Copson, 2015 <sup>156</sup> , Prospective Study of Outcomes in Sporadic and Hereditary Breast Cancer (POSH), United Kingdom, BMI – Included, review | Prospective cohort study (n=2843) Premenopausal Mean age:36 years            | 2000-2008 Follow up= 5.87 years 3.1% lost to follow-up | Invasive breast cancer                                                                                                                                                                  | Height and weight were measured at registration. | Overall survival                 | ≥30 vs <25 kg/m <sup>2</sup> | 1.35 ( 1.08 - 1.68 )    | Tumor grade, Tumor size, Nodal status, HER2 status , Age at diagnosis, Race |
|                                                                                                                                                     |                                                                              |                                                        |                                                                                                                                                                                         |                                                  | Overall survival ER positive     | ≥30 vs <25 kg/m <sup>2</sup> | 1.47 ( 1.12 - 1.95 )    |                                                                             |
|                                                                                                                                                     |                                                                              |                                                        |                                                                                                                                                                                         |                                                  | Overall survival ER negative     | ≥30 vs <25 kg/m <sup>2</sup> | 1.16 ( 0.81 - 1.66 )    |                                                                             |
|                                                                                                                                                     |                                                                              |                                                        |                                                                                                                                                                                         |                                                  | Distant disease free             | ≥30 vs <25 kg/m <sup>2</sup> | 1.22 ( 1.00 - 1.51 )    |                                                                             |
|                                                                                                                                                     |                                                                              |                                                        |                                                                                                                                                                                         |                                                  | Distant disease free ER positive | ≥30 vs <25 kg/m <sup>2</sup> | 1.37 ( 1.06 - 1.76 )    |                                                                             |

|                                                                                                                      |                                                                              |                                                                                                                                                 |                                                           |                |                                                |                              |                       |                                                                                       |
|----------------------------------------------------------------------------------------------------------------------|------------------------------------------------------------------------------|-------------------------------------------------------------------------------------------------------------------------------------------------|-----------------------------------------------------------|----------------|------------------------------------------------|------------------------------|-----------------------|---------------------------------------------------------------------------------------|
|                                                                                                                      |                                                                              |                                                                                                                                                 |                                                           |                | Distant disease free<br>ER negative            | ≥30 vs <25 kg/m <sup>2</sup> | 1.00 ( 0.70 - 1.41 )  |                                                                                       |
| Crispo, 2015 <sup>157</sup> ,<br>G. Pascale<br>National Cancer<br>Institute, Italy,<br><br>BMI – Included,<br>review | Retrospective<br>cohort study (n=<br>448 )<br>Pre-, peri-,<br>postmenopausal | 2004-2006<br>Follow up= 61.8<br>months                                                                                                          |                                                           | Interviewed    | Overall<br>survival(n=319)<br>Symptomatic      | ≥30 vs <25 kg/m <sup>2</sup> | 0.64 ( 0.28 - 1.42 )  | Age, education,<br>menopausal status,<br>Tumor size, Nodal<br>status, Receptor status |
|                                                                                                                      |                                                                              |                                                                                                                                                 |                                                           |                | Overall<br>survival(n=107)<br>Screened         | ≥30 vs <25 kg/m <sup>2</sup> | 7.92 ( 0.92 - 68.4 )  |                                                                                       |
|                                                                                                                      |                                                                              |                                                                                                                                                 |                                                           |                | Disease-free<br>survival(n=319)<br>Symptomatic | ≥30 vs <25 kg/m <sup>2</sup> | 0.68 ( 0.37 - 1.28 )  |                                                                                       |
|                                                                                                                      |                                                                              |                                                                                                                                                 |                                                           |                | Disease-free<br>survival(n=107)<br>Screened    | ≥30 vs <25 kg/m <sup>2</sup> | 2.75 ( 0.37 - 20.29 ) |                                                                                       |
| Fan, 2015 <sup>289</sup> ,<br>China,<br><br>BMI - Excluded                                                           | Retrospective<br>cohort study (n=<br>3966 )<br>Pre and post-<br>menopausal   | 2005-2008<br>Follow up= 66<br>months<br>The 5-year RFS<br>rate and OS rate<br>for the entire<br>cohort were<br>79.1% and 86.4%,<br>respectively | Invasive breast cancer<br>ER-/ PgR+/HER2- 6%<br>TNBC 8.8% | No description | all-cause<br>mortality ER-<br>/PgR+/HER2-      | ≥25 vs <25 kg/m <sup>2</sup> | P = 0.803             | Unadjusted                                                                            |
|                                                                                                                      |                                                                              |                                                                                                                                                 |                                                           |                | all-cause<br>mortality Triple-<br>negative     | ≥25 vs <25 kg/m <sup>2</sup> | P = 0.903             | Unadjusted                                                                            |
|                                                                                                                      |                                                                              |                                                                                                                                                 |                                                           |                | Relapse-free ER-<br>/PgR+/HER2-                | ≥25 vs <25 kg/m <sup>2</sup> | P = 0.34              | Unadjusted                                                                            |
|                                                                                                                      |                                                                              |                                                                                                                                                 |                                                           |                | Relapse-free<br>Triple-negative                | ≥25 vs <25 kg/m <sup>2</sup> | P = 0.404             | Unadjusted                                                                            |

|                                                                                                              |                                                                                                                          |                                                                     |                                                                                                                                                                                                                                                                                                                                                                                                                                                                                                                                                                  |                             |                                                                                       |                                                              |                                                              |                                       |
|--------------------------------------------------------------------------------------------------------------|--------------------------------------------------------------------------------------------------------------------------|---------------------------------------------------------------------|------------------------------------------------------------------------------------------------------------------------------------------------------------------------------------------------------------------------------------------------------------------------------------------------------------------------------------------------------------------------------------------------------------------------------------------------------------------------------------------------------------------------------------------------------------------|-----------------------------|---------------------------------------------------------------------------------------|--------------------------------------------------------------|--------------------------------------------------------------|---------------------------------------|
| <p>Fei F, 2015<sup>384</sup>, EORTC 10994/BIG 1- 00 phase III trial, Multi-country</p> <p>BMI - Excluded</p> | <p>Female, Secondary analysis of clinical trials (n=283) , (n): Premenopausal 178, Postmenopausal 104, Missing 1.</p>    | <p>Diagnosed:2001-2006 (randomised) follow Up: Median 57 months</p> | <p>Breast cancer. Histological grade (n): I 9, II 96, III 137, Unknown 41. Subtype (n): Luminal A 37, Luminal B HER2-negative 22, Luminal B HER2-positive 51, HER2-positive (non-luminal) 42, Triple negative 70, Unknown 61. P53 status (n): Wild type 90, Mutated 130, Unknown 63. Randomised treatment (n): anthracycline based chemotherapy 135, docetaxel and epirubicin+docetaxel 148. Type of surgery (Primary) (n): Lumpectomy/quadrantectomy 181, Mastectomy 102. After surgery, treatment was completed with radiotherapy and/or hormonal therapy.</p> | <p>Measured</p>             | <p>Recurrence free interval (n=40)</p> <p>Distant recurrence free interval (n=28)</p> | <p>BMI<math>\geq</math>30 vs BMI &lt;25 kg/m<sup>2</sup></p> | <p>0.81(0.31-2.10)</p> <p>0.91(0.31-2.66) P trend=0.4747</p> | <p>Unadjusted</p>                     |
| <p>Fontanella, 2015<sup>161</sup>, Germany,</p> <p>BMI – Included, review</p>                                | <p>Pooled analysis of 8 neoadjuvant trials (n= 4061 ) Mean age:49.7 years</p> <p>Trials GeparQuattro and GeparQuinto</p> | <p>1999-2011 Follow up= 42.7 months</p>                             | <p>Invasive breast cancer T1–2 71.0% T3 16.5% T4 a-c: 6.9% T4 d: 5.6% ER+ 38.1% ER- 61.9% PgR+ 46.6% PgR- 53.4% HER2+ 72.1% HER2- 31.2%</p>                                                                                                                                                                                                                                                                                                                                                                                                                      | <p>BMI before treatment</p> | <p>overall survival</p>                                                               | <p><math>\geq</math>40 vs 18.5-24.9 kg/m<sup>2</sup></p>     | <p>2.21 ( 1.26 - 3.86 )</p>                                  | <p>study, number of comorbidities</p> |

|                                                                                                    |                                                               |                                            |                                                                                |                  |                                                        |                                    |                      |                                                                                                                                                                |
|----------------------------------------------------------------------------------------------------|---------------------------------------------------------------|--------------------------------------------|--------------------------------------------------------------------------------|------------------|--------------------------------------------------------|------------------------------------|----------------------|----------------------------------------------------------------------------------------------------------------------------------------------------------------|
|                                                                                                    |                                                               |                                            |                                                                                |                  | Disease-free survival                                  | ≥40 vs 18.5-24.9 kg/m <sup>2</sup> | 1.43 ( 0.86 - 2.39 ) |                                                                                                                                                                |
| Hao, 2015 <sup>167</sup> , China, BMI – Included, review                                           | Retrospective cohort study (n= 1106 ) Pre and post-menopausal | Treatment 2002-2012 Follow up= 44.8 months | Triple negative breast cancers Stage I – II 43.3% III 56.6% Chemotherapy 94.2% | BMI at diagnosis | Overall survival (n=154)                               | >24 vs ≤24 kg/m <sup>2</sup>       | 1.46 ( 1.04 - 2.06 ) | Age at diagnosis, menopausal status, Tumor size, Nodal status, grade, Systemic adjuvant therapy                                                                |
|                                                                                                    |                                                               |                                            |                                                                                |                  | Overall survival(n=58) pre-menopausal                  | >24 vs ≤24 kg/m <sup>2</sup>       | 2.16 ( 1.21 - 3.87 ) |                                                                                                                                                                |
|                                                                                                    |                                                               |                                            |                                                                                |                  | Overall survival(n=96) post-menopausal                 | >24 vs ≤24 kg/m <sup>2</sup>       | 1.07 ( 0.7 - 1.64 )  |                                                                                                                                                                |
|                                                                                                    |                                                               |                                            |                                                                                |                  | Breast cancer-specific mortality(n=106)                | >24 vs ≤24 kg/m <sup>2</sup>       | 1.34 ( 0.9 - 2.01 )  |                                                                                                                                                                |
|                                                                                                    |                                                               |                                            |                                                                                |                  | Breast cancer-specific mortality(n=40) pre-menopausal  | >24 vs ≤24 kg/m <sup>2</sup>       | 2.27 ( 1.11 - 4.63 ) |                                                                                                                                                                |
|                                                                                                    |                                                               |                                            |                                                                                |                  | Breast cancer-specific mortality(n=66) post-menopausal | >24 vs ≤24 kg/m <sup>2</sup>       | 0.96 ( 0.58 - 1.58 ) |                                                                                                                                                                |
| Herlevic, 2015 <sup>170</sup> , Feist-Weiller Cancer Center, United States, BMI – Included, review | Retrospective cohort study (n= 523 ) Mean age:61.2 years      | Treatment: 1997-2013 Follow up= 49 months  | Invasive breast cancer Excluded stage IV                                       | BMI at diagnosis | Overall survival(n=86)                                 | ≥25 vs <25 kg/m <sup>2</sup>       | 0.75 ( 0.56 - 1.02 ) | Age at diagnosis, T stage, N stage, tumor grade, ethnicity, ER positivity, progesterone receptor positivity, Her-2 overexpression, and receipt of chemotherapy |
|                                                                                                    |                                                               |                                            |                                                                                |                  | Disease-free survival                                  | ≥25 vs <25 kg/m <sup>2</sup>       | 0.75 ( 0.59 - 0.96 ) |                                                                                                                                                                |
| Jeon YW, 2015 <sup>78</sup> , Korean Breast                                                        | Prospective cohort study of                                   | 1988-2008 Follow up= 92 months             | Invasive breast cancer, no metastasis                                          | From records     | Overall survival(n=4468)                               | ≥30 vs 18.5-24.9kg/m <sup>2</sup>  | 1.29 (1.13 - 1.48)   | Age, tumour size, histological grade,                                                                                                                          |

|                                                                     |                                                                                                                                                |                                                                                                            |                                                                                                                                                                                                                                                                                                                      |                           |                                           |                                   |                                         |                                                                                                                      |
|---------------------------------------------------------------------|------------------------------------------------------------------------------------------------------------------------------------------------|------------------------------------------------------------------------------------------------------------|----------------------------------------------------------------------------------------------------------------------------------------------------------------------------------------------------------------------------------------------------------------------------------------------------------------------|---------------------------|-------------------------------------------|-----------------------------------|-----------------------------------------|----------------------------------------------------------------------------------------------------------------------|
| Cancer Registry (KBCR), Korea,<br><br>BMI – Included, meta-analysis | cancer survivors (n= 41021)<br><br>Pre- and postmenopausal<br><br>Mean age: 48 years<br><br>Excluded patients treated with neoadjuvant therapy | 4468 deaths<br><br>2824 breast cancer deaths                                                               | Grade 1-2: 48.86%,<br><br>3: 38.74%<br><br>ER and/or PR+/HER2- 51.42%<br><br>ER and/or PR+/HER2+ 10.04%<br><br>ER and PR-/HER2+ 9.48%<br><br>ER and PR-/HER2- - 18.13%<br><br>Unknown: 10.94%<br><br>Mastectomy: 56.95%<br><br>Conserving surgery: 43.05%<br><br>Chemotherapy: 70.24%<br><br>Hormone therapy: 64.03% | at diagnosis              |                                           |                                   |                                         | lymph node status, operation type, Adjuvant therapy, ER/PR status, HER2 status                                       |
|                                                                     |                                                                                                                                                |                                                                                                            |                                                                                                                                                                                                                                                                                                                      |                           | Breast cancer-specific mortality (n=2824) | ≥30 vs 18.5-24.9kg/m <sup>2</sup> | 1.21 (1.02 - 1.43)                      | Age, tumour size, histological grade, lymph node status, operation type, Adjuvant therapy, ER/PR status, HER2 status |
| Karpińska, 2015 <sup>173</sup> ,<br><br>BMI – Included, review      | Retrospective cohort study (n= 105 ) mean age:49.9                                                                                             | 2001-2006.<br>Follow up= 5 years<br>24 deaths<br>20 cancer deaths<br>4 non-cancer deaths<br>29 recurrences | Oestrogen receptors positive: 61 (58,1%)<br>neg: 44 (41,9%) stages IIIA, IIIB, IIIC)                                                                                                                                                                                                                                 | at diagnosis/at enrolment | Overall survival                          | Obese vs non-obese                | 3.146 ( 1.015 - 9.756 )<br><br>P =0.047 | Age, hormone dependency, menopause, tumour stage,                                                                    |



|                                                                |                                              |                                                                                                                            |                                                         |              |                                                             |                                |                                    |                                                                                                                                                   |
|----------------------------------------------------------------|----------------------------------------------|----------------------------------------------------------------------------------------------------------------------------|---------------------------------------------------------|--------------|-------------------------------------------------------------|--------------------------------|------------------------------------|---------------------------------------------------------------------------------------------------------------------------------------------------|
|                                                                |                                              |                                                                                                                            |                                                         |              | Disease-free survival                                       | Obese vs non-obese             | 2.177 ( 0.909 - 5.216 )<br>P =0.08 |                                                                                                                                                   |
| Kim, 2015 <sup>83</sup> ,<br><br>BMI – Included, meta-analysis | Retrospective cohort study<br><br>(n= 6967 ) | Data from the Asan Medical Center Breast Cancer Database (AMCBCD) from 1997 to 2007 were analysed. Follow up= 100.3 months | Tumor size: =2cm<br>Chemotherapy;<br>endocrine therapy. | at diagnosis | Breast cancer-specific mortality                            | <18.5 vs ≥25 kg/m <sup>2</sup> | 1.52 (1.08 - 2.14)                 | Tumour size, lymph node metastasis, ER status, PR status, Her-2/neu, systemic treatment (chemotherapy, hormonal therapy and biological treatment) |
|                                                                |                                              |                                                                                                                            |                                                         |              | Breast cancer-specific mortality hormone receptor +, HER2 - | <18.5 vs ≥25 kg/m <sup>2</sup> | 2.11 (1.2 - 3.68)                  |                                                                                                                                                   |
|                                                                |                                              |                                                                                                                            |                                                         |              | Breast cancer-specific mortality hormone receptor +, HER2 + | <18.5 vs ≥25 kg/m <sup>2</sup> | 1.50 (0.53 - 4.3)                  |                                                                                                                                                   |
|                                                                |                                              |                                                                                                                            |                                                         |              | Breast cancer-specific mortality hormone receptor -, HER2 + | <18.5 vs ≥25 kg/m <sup>2</sup> | 1.63 ( 0.79 - 3.38 )               |                                                                                                                                                   |
|                                                                |                                              |                                                                                                                            |                                                         |              | Breast cancer-specific mortality hormone receptor -, HER2 - | <18.5 vs ≥25 kg/m <sup>2</sup> | 1.17 ( 0.62 - 2.23 )               |                                                                                                                                                   |
|                                                                |                                              |                                                                                                                            |                                                         |              | Disease-free survival                                       | <18.5 vs ≥25 kg/m <sup>2</sup> | 1.17 (1.1 - 1.17 )                 |                                                                                                                                                   |
|                                                                |                                              |                                                                                                                            |                                                         |              | Disease-free survival hormone receptor +, HER2-             | <18.5 vs ≥25 kg/m <sup>2</sup> | 1.62 (1.04 - 2.54)                 |                                                                                                                                                   |
|                                                                |                                              |                                                                                                                            |                                                         |              | Disease-free survival hormone                               | <18.5 vs ≥25 kg/m <sup>2</sup> | 2.15 (1.00 - 4.63)                 |                                                                                                                                                   |

|                                                                     |                                      |                        |                                                                                                                                                                                       |                                                                                                                                                               |                                                  |                                |                         |                                                                                                            |
|---------------------------------------------------------------------|--------------------------------------|------------------------|---------------------------------------------------------------------------------------------------------------------------------------------------------------------------------------|---------------------------------------------------------------------------------------------------------------------------------------------------------------|--------------------------------------------------|--------------------------------|-------------------------|------------------------------------------------------------------------------------------------------------|
|                                                                     |                                      |                        |                                                                                                                                                                                       |                                                                                                                                                               | receptor +, HER2 +                               |                                |                         |                                                                                                            |
|                                                                     |                                      |                        |                                                                                                                                                                                       |                                                                                                                                                               | Disease-free survival hormone receptor-, HER2 +  | <18.5 vs ≥25 kg/m <sup>2</sup> | 1.81 ( 0.98 - 3.35 )    |                                                                                                            |
|                                                                     |                                      |                        |                                                                                                                                                                                       |                                                                                                                                                               | Disease-free survival hormone receptor -, HER2 - | <18.5 vs ≥25 kg/m <sup>2</sup> | 1.00 ( 0.54 - 1.83 )    |                                                                                                            |
| Kogawa, 2015 <sup>84</sup> , MD Anderson Cancer Centre (MDACC), USA | Retrospective cohort study (n= 1002) | Follow up= 19.6 months | Invasive breast cancer<br>Clinical stage: III/IIIA: 29.7%; IIIB: 25.8%; IIIC:44.4% cT stage: T1: 4.1%; T2: 22.5%; T3:32.8%; T4: 40.6%<br>ER:-36.3%, ER+:63.7%; PR-: 54.4%, PR+: 45.6% | BMI was measured at diagnosis before chemotherapy and again at the last cycle of NST, and the change in BMI was calculated as the difference between the two. | Overall survival<br>BMI <25                      | Per 1 kg/m <sup>2</sup>        | 0.996 (0.84 - 1.181)    | Inflammatory breast cancer, hormonal receptor status, HER2 status, clinical stage, lymph vascular invasion |
|                                                                     |                                      |                        |                                                                                                                                                                                       |                                                                                                                                                               | Overall survival<br>25≤BMI<30                    | Per 1 kg/m <sup>2</sup>        | 0.833 ( 0.652 - 1.065 ) |                                                                                                            |
|                                                                     |                                      |                        |                                                                                                                                                                                       |                                                                                                                                                               | Overall survival<br>BMI>30kg/m <sup>2</sup>      | Per 1 kg/m <sup>2</sup>        | 0.995 ( 0.952 - 1.041 ) |                                                                                                            |
|                                                                     |                                      |                        |                                                                                                                                                                                       |                                                                                                                                                               | Recurrence free survival<br>BMI <25              | Per 1 kg/m <sup>2</sup>        | 0.953 ( 0.84 - 1.082 )  |                                                                                                            |
|                                                                     |                                      |                        |                                                                                                                                                                                       |                                                                                                                                                               | Recurrence free survival<br>25≤BMI<30            | Per 1 kg/m <sup>2</sup>        | 0.97 ( 0.807 - 1.166 )  |                                                                                                            |
|                                                                     |                                      |                        |                                                                                                                                                                                       |                                                                                                                                                               | Recurrence free survival<br>BMI >30              | Per 1 kg/m <sup>2</sup>        | 1.004 ( 0.973 - 1.037 ) |                                                                                                            |

|                                                                                                                                    |                                                                                                                                                                                                                          |                                                                                                             |                                                                                                                                                                                                                                                                                                        |                                                                           |                        |                              |                      |                                                                                                                               |
|------------------------------------------------------------------------------------------------------------------------------------|--------------------------------------------------------------------------------------------------------------------------------------------------------------------------------------------------------------------------|-------------------------------------------------------------------------------------------------------------|--------------------------------------------------------------------------------------------------------------------------------------------------------------------------------------------------------------------------------------------------------------------------------------------------------|---------------------------------------------------------------------------|------------------------|------------------------------|----------------------|-------------------------------------------------------------------------------------------------------------------------------|
| Larsen, 2015 <sup>182</sup> ,<br>DCHS, Denmark,<br><br>BMI – Included,<br>review                                                   | Prospective<br>cohort study (n=<br>1229 )<br>Postmenopausal<br>Age range: 50-64<br>years                                                                                                                                 | 1993-1997 Follow<br>up= 9.6 years                                                                           | Invasive breast cancer<br>Stage 1 40%, 2 50%, 3<br>2%, unknown 8%<br>ER+ 76%, ER- 16%<br>Unknown 9%                                                                                                                                                                                                    | From hospital<br>records or<br>questionnaire,<br>BMI, WC at-<br>diagnosis | all-cause<br>mortality | ≥30 vs <25 kg/m <sup>2</sup> | 1.10 ( 0.79 - 1.54 ) | Age, Tumor size, lymph<br>node status, number of<br>positive lymph nodes,<br>malignancy grade,<br>estrogen receptor<br>status |
|                                                                                                                                    |                                                                                                                                                                                                                          |                                                                                                             |                                                                                                                                                                                                                                                                                                        |                                                                           | all-cause<br>mortality | ≥30 vs <25 kg/m <sup>2</sup> | 1.09 ( 0.78 - 1.51 ) | Age, Charlson<br>Comorbidity Index                                                                                            |
| Ligibel JA, 2015 <sup>88</sup> ,<br>Cancer and<br>Leukemia Group<br>B (CALGB) 9741,<br>USA<br><br>BMI – Included,<br>meta-analysis | Secondary<br>analysis of clinical<br>trial (n= 1909)<br><br>Pre- (49.8%) and<br>postmenopausal<br>(50.2%)<br><br>Mean age: 50<br>years<br><br>White 82.3%<br><br>Recruited women<br>diagnosed within<br>the past 84 days | 1997-1999<br><br>Follow up= 11<br>years<br><br>543 deaths<br><br>619 recurrence-<br>free survival<br>events | Node+ invasive breast<br>cancer, no metastasis<br><br>Tumour size: 2-≤5<br>57.9%<br><br>ER+ 64.7%<br><br>ER- 33.5%,<br><br>PgR+ 56.6%<br><br>PgR- 41.2%<br><br>PAM50 subset:<br><br>403 luminal A<br><br>334 luminal B<br><br>251 HER2-enriched<br><br>284 basal-like cases<br><br>Tamoxifen use 70.6% | From record, at<br>diagnosis, after<br>surgery before<br>systemic therapy | Overall(n=543)         | Per 5 kg/m <sup>2</sup>      | 1.08 ( 1.01 - 1.14 ) | Nodal involvement, ER<br>status, Tumour size,<br>menopausal status,<br>drug sequence, dose<br>density                         |

|                                                                    |                                                                                          |                          |                                                                                                                                                                         |                 |                                        |                               |                      |                                           |
|--------------------------------------------------------------------|------------------------------------------------------------------------------------------|--------------------------|-------------------------------------------------------------------------------------------------------------------------------------------------------------------------|-----------------|----------------------------------------|-------------------------------|----------------------|-------------------------------------------|
|                                                                    |                                                                                          |                          | Received doxorubicin, cyclophosphamide, paclitaxel<br><br>1.9% patients received reduced doses of doxorubicin. Proportion not different by BMI category                 |                 |                                        |                               |                      |                                           |
|                                                                    |                                                                                          |                          |                                                                                                                                                                         |                 | Recurrence-free survival(n=619)        | Per 5 kg/m <sup>2</sup>       | 1.08 ( 1.02 - 1.14 ) |                                           |
|                                                                    |                                                                                          |                          |                                                                                                                                                                         |                 | Recurrence-free survival<br>Luminal A  | Per 5 kg/m <sup>2</sup>       | 1.23 ( 1.08 - 1.40 ) |                                           |
|                                                                    |                                                                                          |                          |                                                                                                                                                                         |                 | Recurrence-free survival<br>Luminal B  | Per 5 kg/m <sup>2</sup>       | 1.00 ( 0.87 - 1.16 ) |                                           |
|                                                                    |                                                                                          |                          |                                                                                                                                                                         |                 | Recurrence-free survival<br>HER2+      | Per 5 kg/m <sup>2</sup>       | 1.10 ( 0.97 - 1.26 ) |                                           |
|                                                                    |                                                                                          |                          |                                                                                                                                                                         |                 | Recurrence-free survival<br>Basal-like | Per 5 kg/m <sup>2</sup>       | 1.11 ( 0.97 - 1.28 ) |                                           |
| Ohara M, 2015 <sup>247</sup> , Japan<br><br>BMI – Included, review | Female, Retrospective Cohort of Cancer Survivors (n=184) mean age:64, All postmenopausal | Diagnosed:2002-2012      | ER+/HER2- breast cancer. Pt stage T1 70.7%, T2 26.6%, T3 0.5%. T4 2.2%. Endocrine therapy with anastrozole 52.2%, letrozole 45.7%, exemestane 2.1%. Chemotherapy 28.8%. | Medical records | Recurrence-free survival (n=16)        | >=25 vs <25 kg/m <sup>2</sup> | 1.04(0.90-1.19)      | Ki-67 expression, nodal status, pr status |
| Osman MA, 2015 <sup>385</sup> , UK<br><br>BMI - Excluded           | Female, Retrospective Cohort of Cancer Survivors (n=118)                                 | Diagnosed: Not reported. | Metastatic breast cancer. Stage (n): I-II 39, III 38, IV 41.Receptor status (n): ER+ve PR+ve                                                                            | Medical records | Progression free survival              | >=25 vs <25 kg/m <sup>2</sup> | Log rank P= 0.06     | Ki-67 expression, nodal status, pr status |

|                                                                                                        |                                                                                                                  |                                                   |                                                                                                                                                                                                                                                                                                |                                                            |                               |                                    |                      |                                                                                                                                   |
|--------------------------------------------------------------------------------------------------------|------------------------------------------------------------------------------------------------------------------|---------------------------------------------------|------------------------------------------------------------------------------------------------------------------------------------------------------------------------------------------------------------------------------------------------------------------------------------------------|------------------------------------------------------------|-------------------------------|------------------------------------|----------------------|-----------------------------------------------------------------------------------------------------------------------------------|
|                                                                                                        |                                                                                                                  |                                                   | 45, ER +ve PR-ve 66, ER-ve PR+ve 7. HER 2 neu (n): Positive 42, Negative 76. Chemotherapy treatment for patients eligible for 2nd part of the study.                                                                                                                                           |                                                            | Overall survival              |                                    | Log rank P= 0.06     |                                                                                                                                   |
| Rossi, 2015 <sup>327</sup> , Curie Institute Breast Cancer Study (CIBCS), France<br><br>BMI - Excluded | Prospective cohort study (n= 32,502 )                                                                            | Treatment: 1981-2008<br>Follow up= 28 years (max) | Invasive breast cancer without metastasis<br>73.6% HR+ /13.9% HR-                                                                                                                                                                                                                              | No description                                             | overall survival(n=8,119)     | ≥30 vs 18.5-24.9 kg/m <sup>2</sup> | 1.22 ( 1.05 - 1.41 ) | Age, menopausal status, histological type, Tumor size, Nodal status, Hormone receptor status, SBR grade of the tumor, Time period |
|                                                                                                        |                                                                                                                  |                                                   |                                                                                                                                                                                                                                                                                                |                                                            | Distant disease free(n=5,946) | ≥30 vs 18.5-24.9 kg/m <sup>2</sup> | 1.22 ( 1.04 - 1.43 ) |                                                                                                                                   |
| Scholz C, 2015 <sup>199</sup> , ADEBAR<br><br>BMI – Included, review                                   | Secondary analysis of clinical trial (n= 1310)<br>Pre- and postmenopausal<br>Age range: 18-70 years<br>High risk | 2001-2005                                         | Lymph-node positive primary breast cancer<br>pT1 28.4%<br>pT2 55.3%<br>pT3 11.9%<br>pT4 4.3%<br>Unknown 0.1%<br>Hormone receptor status:<br>Negative 21.6% Positive 76.4%<br>Unknown 2.0%<br>HER2 negative 68.9%<br>Positive 23.1%<br>Unknown 8.1%<br>Chemotherapy: EC-Doc 50.2%, FEC120 49.8% | Measured at randomisation trial, prior to adjuvant therapy | Total mortality (n=225)       | ≥ 30 vs < 30 kg/m <sup>2</sup>     | 1.56 ( 1.14 - 2.14 ) | Age, menopausal status, tumor stage, nodal status, histological grade, type, hormone receptor status, HER2 status , chemotherapy  |

|                                                           |                                                   |                                    |                                                           |                                                        |                                                |                                |                      |                                                                                      |
|-----------------------------------------------------------|---------------------------------------------------|------------------------------------|-----------------------------------------------------------|--------------------------------------------------------|------------------------------------------------|--------------------------------|----------------------|--------------------------------------------------------------------------------------|
|                                                           |                                                   |                                    |                                                           |                                                        | Total mortality(n=71.0) pre-menopausal         | ≥ 30 vs < 30 kg/m <sup>2</sup> | 0.94 ( 0.46 - 1.89 ) |                                                                                      |
|                                                           |                                                   |                                    |                                                           |                                                        | Total mortality(n=151.0) post-menopausal       | ≥ 30 vs < 30 kg/m <sup>2</sup> | 1.79 ( 1.25 - 2.58 ) |                                                                                      |
|                                                           |                                                   |                                    |                                                           |                                                        | Total mortality(n=139.0) HR+                   | ≥ 30 vs < 30 kg/m <sup>2</sup> | 1.48 ( 0.99 - 2.21 ) |                                                                                      |
|                                                           |                                                   |                                    |                                                           |                                                        | Total mortality(n=78.0) HR-                    | ≥ 30 vs < 30 kg/m <sup>2</sup> | 1.23 ( 0.7 - 2.16 )  |                                                                                      |
|                                                           |                                                   |                                    |                                                           |                                                        | Disease-free survival(n=362.0)                 | ≥ 30 vs < 30 kg/m <sup>2</sup> | 1.43 ( 1.11 - 1.86 ) |                                                                                      |
|                                                           |                                                   |                                    |                                                           |                                                        | Disease-free survival(n=125.0) pre-menopausal  | ≥ 30 vs < 30 kg/m <sup>2</sup> | 1.06 ( 0.63 - 1.76 ) |                                                                                      |
|                                                           |                                                   |                                    |                                                           |                                                        | Disease-free survival(n=234.0) post-menopausal | ≥ 30 vs < 30 kg/m <sup>2</sup> | 1.56 ( 1.15 - 2.12 ) |                                                                                      |
|                                                           |                                                   |                                    |                                                           |                                                        | Disease-free survival(n=242.0) HR+             | ≥ 30 vs < 30 kg/m <sup>2</sup> | 1.53 ( 1.12 - 2.09 ) |                                                                                      |
|                                                           |                                                   |                                    |                                                           |                                                        | Disease-free survival(n=109.0) HR-             | ≥ 30 vs < 30 kg/m <sup>2</sup> | 0.87 ( 0.53 - 1.44 ) |                                                                                      |
| Sun X, 2015 <sup>109</sup> , Carolina Breast Cancer Study | Follow-up of cases in case-control study (n=1109) | 1993-2001<br>Follow up= 13.5 years | Invasive breast cancer<br>Stage I 37%, II 50%, III-IV 12% | Measured at interview, average 145 days post-diagnosis | Overall mortality (n=438)                      | ≥30 vs <25 kg/m <sup>2</sup>   | 1.11 ( 0.84 - 1.45 ) | Age, physical activity, alcohol intake, smoking, parity, WHR, tumour stage and size, |

|                                                                                            |                                                            |                                                              |                                                                                                                                                                                                                                                                                                                                                         |  |                                         |                              |                      |                                                                             |
|--------------------------------------------------------------------------------------------|------------------------------------------------------------|--------------------------------------------------------------|---------------------------------------------------------------------------------------------------------------------------------------------------------------------------------------------------------------------------------------------------------------------------------------------------------------------------------------------------------|--|-----------------------------------------|------------------------------|----------------------|-----------------------------------------------------------------------------|
| (CBCS), United States                                                                      | Pre- (49%) and postmenopausal (51%)                        | 435 deaths<br>268 breast cancer deaths                       | Luminal 64%<br>Basal-like 18%<br>HER2+ 6%<br>Normal-like 11%<br>No treatment information                                                                                                                                                                                                                                                                |  |                                         |                              |                      | lymph node status, histological type, race, study phase, Income, education, |
| BMI – Included, meta-analysis                                                              | Mean age: 50.60 years<br>White 55%<br>African-American 45% |                                                              |                                                                                                                                                                                                                                                                                                                                                         |  |                                         |                              |                      |                                                                             |
|                                                                                            |                                                            |                                                              |                                                                                                                                                                                                                                                                                                                                                         |  | Breast cancer-specific mortality(n=269) | ≥30 vs <25 kg/m <sup>2</sup> | 0.97 ( 0.68 - 1.37 ) |                                                                             |
| Tichy, 2015 <sup>113</sup> , Lineberger Comprehensive Cancer Center (LCCC), United States, | Prospective cohort study (n= 349)<br>Mean age:48 years     | Follow up= 6.5 years 107 breast cancer recurrences 98 deaths | HR-/HER2- 30%,<br>HR-/HER2+ 13.2%,<br>HR+/HER2- 42.1%,<br>HR+/HER2+ 14.6%<br>Grade III at diagnosis: 65% in non-AA, 69% in AA<br>Stage II at diagnosis: 45.6% overall<br>Stage III at diagnosis: 54.4% overall<br>Neoadjuvant regimen: A+T 83.5%, A no T 8.5%, T no A 8%<br>Endocrine therapy receipt (HR+ only) 97%<br>Post-mastectomy radiation 52.7% |  | Overall survival                        | Per 1 unit                   | 1.02 (0.99-1.04)     | Age, race, subtype, tumour stage, pCR                                       |
| BMI – Included, meta-analysis (mortality)                                                  |                                                            |                                                              |                                                                                                                                                                                                                                                                                                                                                         |  | Overall survival                        | Per 1 unit                   | 1.02 (0.99-1.05)     |                                                                             |
| Excluded (recurrence)                                                                      |                                                            |                                                              |                                                                                                                                                                                                                                                                                                                                                         |  | HR+                                     |                              |                      |                                                                             |
|                                                                                            |                                                            |                                                              |                                                                                                                                                                                                                                                                                                                                                         |  | Overall survival                        | Per 1 unit                   | 1.02 (0.98-1.05)     |                                                                             |
|                                                                                            |                                                            |                                                              |                                                                                                                                                                                                                                                                                                                                                         |  | HR-                                     |                              |                      |                                                                             |
|                                                                                            |                                                            |                                                              |                                                                                                                                                                                                                                                                                                                                                         |  | Breast cancer recurrence                | Per 1 unit                   | 1.01 (0.98-1.01)     |                                                                             |
|                                                                                            |                                                            |                                                              |                                                                                                                                                                                                                                                                                                                                                         |  | Breast cancer recurrence HR+            | Per 1 unit                   | 1.00 (0.97-1.03)     |                                                                             |

|                                                                                                                                           |                                                                                                                                                                                                                                                        |                                                                               |                                                                                                                                                                                                                                                                                                   |                                      |                               |                                |                            |                                                                                                                                                                                                               |
|-------------------------------------------------------------------------------------------------------------------------------------------|--------------------------------------------------------------------------------------------------------------------------------------------------------------------------------------------------------------------------------------------------------|-------------------------------------------------------------------------------|---------------------------------------------------------------------------------------------------------------------------------------------------------------------------------------------------------------------------------------------------------------------------------------------------|--------------------------------------|-------------------------------|--------------------------------|----------------------------|---------------------------------------------------------------------------------------------------------------------------------------------------------------------------------------------------------------|
|                                                                                                                                           |                                                                                                                                                                                                                                                        |                                                                               |                                                                                                                                                                                                                                                                                                   |                                      | Breast cancer recurrence HR-  | Per 1 unit                     | 1.03 (0.99-1.07)           |                                                                                                                                                                                                               |
| Widschwendter P, 2015 <sup>116</sup> , Success A, Germany,<br><br>BMI – Included, meta-analysis                                           | Secondary analysis of clinical trial (n= 3754)<br><br>Pre- (41.7%) and postmenopausal (58.3%)<br><br>Mean age: 53 years<br><br>High-risk breast cancer patients (pN1–3, tumour size ≥ pT2, histological grade 3, negative HR status or age ≤ 35 years) | 2005-2007<br><br>Follow up= 65 months<br><br>302 deaths<br><br>502 recurrence | Early invasive breast cancer<br><br>Luminal A 38%, luminal B 16.5%, HER2+ 23.5%,<br><br>TNBC 19.8%<br><br>Mastectomy 29.2%, breast conserving 70.3%<br><br>Chemotherapy, FEC-DocG: 49.4%, FEC-Doc: 50.6 %<br><br>Undertreatment (<6 cycles CT), no: 90.4%, yes: 9.6%<br><br>Hormone therapy 71.3% | Measured prior to adjuvant treatment | Overall survival (n=302)      | ≥40 vs ≤24.9 kg/m <sup>2</sup> | 2.79 ( 1.63 - 4.77 )       | Age, tumour size, nodal status, tumour grade, histological type, hormone receptor status, HER2 status , menopausal status, type of surgery, chemotherapy, antihormone treatment, undertreatment (<6 cycle CT) |
|                                                                                                                                           |                                                                                                                                                                                                                                                        |                                                                               |                                                                                                                                                                                                                                                                                                   |                                      | Disease-free survival (n=502) | ≥40 vs ≤24.9 kg/m <sup>2</sup> | 2.70 ( 1.71 - 4.28 )       |                                                                                                                                                                                                               |
| Zeichner SB, 2015 <sup>248</sup> , University of Miami/Sylvester Comprehensive Cancer Center (UM/SCCC), USA<br><br>BMI – Included, review | Female, Retrospective Cohort of Cancer Survivors (n=246) mean age:54, Non-hispanic/hispanic White                                                                                                                                                      | Diagnosed:2006-2012 (treatment) follow Up: Median 29.5 months                 | Nonmetastatic, histologic grade low/intermediate 39.7%, high 60.3%, HER2+ 100%, ER+ 63.6%, ER- 36.4%, PR+ 53%, PR- 47.% Taxane + trastuzumab 57.3%, Taxane + trastuzumab + anthracycline 13%. Adjuvant radiation 88%. Hormone therapy 58.1%. Lumpectomy 34.9%, mastectomy 60.6%, no surgery 4.6%. | Medical Records                      | Overall survival (n=21)       | ≥30 vs <30 kg/m <sup>2</sup>   | 0.79(0.15-4.13)<br>P=0.780 | Age at diagnosis, ER status, histological grade, lymph node metastasis , tumor size, vitamin d                                                                                                                |
|                                                                                                                                           |                                                                                                                                                                                                                                                        |                                                                               |                                                                                                                                                                                                                                                                                                   |                                      | Disease free survival (n=89)  |                                | 0.62(0.23-1.66)<br>P=0.344 |                                                                                                                                                                                                               |



|                                                                                |                                                                                                   |                                                                                        |                                                                                                                                                                                                                                                                                                         |                                           |                                              |                              |                                     |                                                                                                                                    |
|--------------------------------------------------------------------------------|---------------------------------------------------------------------------------------------------|----------------------------------------------------------------------------------------|---------------------------------------------------------------------------------------------------------------------------------------------------------------------------------------------------------------------------------------------------------------------------------------------------------|-------------------------------------------|----------------------------------------------|------------------------------|-------------------------------------|------------------------------------------------------------------------------------------------------------------------------------|
| Zhang, 2015 <sup>213</sup> ,<br>BMI – Included,<br>review                      | Retrospective<br>cohort study (n=<br>1699 ) mean<br>age:54                                        | Diagnosis year:<br>2009-2012 Follow<br>up= 16 months                                   | Early breast cancer,<br>stage: 795 I-II, 585 III,<br>319 unknown; T status:<br>183 Tis, 809 T1, 663 T2-<br>4, 44 unknown; ER<br>status: 504 positive,<br>1111 negative, 84<br>unknown; PR status:<br>886 positive, 731<br>negative, 82 unknown<br>Surgery: 1244<br>mastectomy, 368<br>breast-conserving | Measured                                  | Total mortality                              | ≥24 vs <24 kg/m <sup>2</sup> | 3.65 ( 1.12 - 11.90 )               | Age, lymph node<br>involvement, ER status                                                                                          |
|                                                                                |                                                                                                   |                                                                                        |                                                                                                                                                                                                                                                                                                         |                                           | Disease-free<br>survival                     | ≥24 vs <24 kg/m <sup>2</sup> | 3.389 ( 1.715 - 6.711 )             | Age, lymph node<br>involvement, ER status,<br>PR status                                                                            |
| Arce-Salinas, 2014<br><sup>140</sup> , Mexico,<br>BMI – Included,<br>review    | Retrospective<br>cohort study (n=<br>819 )<br>Pre and post-<br>menopausal<br>Mean age:49<br>years | Follow up= 29<br>months                                                                | AJCC stage IIB-IIIB<br>ER+ 44.3%<br>PR+ 55.3%<br>HER2+ 17.7%<br>TNBC 25.4%                                                                                                                                                                                                                              | From records                              | all-cause<br>mortality(n=184)                | Obesity vs non-obese         | 1.79 ( 1.15 - 3.2 )<br><br>P =0.012 | Menopausal status,<br>presence of<br>diabetes, HER2<br>positivity, triple<br>negative subtype,<br>clinical stage, nuclear<br>grade |
| Chapman, 2014<br><sup>279</sup><br>NCIC CTG MA.14,<br>Canada<br>BMI - Excluded | RCT (n= 667 )<br>Postmenopausal<br>mean age:60.1                                                  | Follow up= 9.8<br>years breast<br>cancer deaths =<br>106 other cause<br>mortality = 55 | Tumor size: T1 n=382,<br>>=T2 n=276 Tamoxifen<br>n=329, tamoxifen +<br>octreotide LAR n=329                                                                                                                                                                                                             |                                           | non-breast-<br>cancer-related<br>death(n=55) | Per 1 kg / m <sup>2</sup>    | 0.9613 ( 0.9418 -<br>0.9802 )       | Treatment,<br>chemotherapy, Nodal<br>status, Hormone<br>receptor status, Age                                                       |
| Fedele, 2014 <sup>160</sup> ,<br>Brindisi study,<br>Italy,<br>BMI - Excluded   | Retrospective<br>cohort study (n=<br>520 ) Mean<br>age:55 years                                   | Treatment 1990-<br>2013<br>Follow up= 66<br>months                                     | Stage I 38%, II 51%, IIIA<br>11%<br>Luminal A 71%, Luminal<br>B 9%, HER2 type 5%,<br>TNBC 15%<br>Adjuvant chemotherapy<br>65%<br>Adjuvant radiation 72%<br>Mastectomy 29%<br>Breast conserving 71%                                                                                                      | BMI measured <1<br>month after<br>surgery | Disease-free<br>survival(n=194)              | High vs low                  | 0.97 ( 0.943 - 0.998 )              | Unadjusted                                                                                                                         |

|                                                                                                                                                                                                  |                                                                                                                                                                                                                       |                                                                                                                                         |                                                                                                                                                                                                                                                  |                                                                           |                                                        |                                       |                                           |                                                                                                                                                                                                                                                                                                                                                                                              |
|--------------------------------------------------------------------------------------------------------------------------------------------------------------------------------------------------|-----------------------------------------------------------------------------------------------------------------------------------------------------------------------------------------------------------------------|-----------------------------------------------------------------------------------------------------------------------------------------|--------------------------------------------------------------------------------------------------------------------------------------------------------------------------------------------------------------------------------------------------|---------------------------------------------------------------------------|--------------------------------------------------------|---------------------------------------|-------------------------------------------|----------------------------------------------------------------------------------------------------------------------------------------------------------------------------------------------------------------------------------------------------------------------------------------------------------------------------------------------------------------------------------------------|
| Huober J, 2014 <sup>386</sup> ,<br>BIG 1-98 study,<br>Mono-therapy<br>arms,<br>Multi-country<br><br>BMI - Excluded                                                                               | Female,<br>Secondary<br>analysis of clinical<br>trials (n=4682)<br>mean age:61,<br>Post-menopausal                                                                                                                    | Diagnosed:1998-<br>2000 (treatment)<br>follow Up:<br>Median 8.7 years                                                                   | Breast cancer stage I<br>25.8%, II 47%, III 13%<br>Monotherapy with 5<br>years tamoxifen, or 5<br>years letrozole, or to<br>sequential treatment<br>with tamoxifen for 2<br>years followed by 3<br>years of letrozole or the<br>reverse          | Measured                                                                  | Disease free<br>survival                               | >=29.7 vs <=23.2<br>kg/m <sup>2</sup> | 0.93(0.77-1.13)                           | Stratified by<br>randomization option<br>(2-arm vs. 4-arm) and<br>chemotherapy use.<br>Adjusted for treatment<br>group, age quartile,<br>prior HRT use (yes or<br>no), nodal status (node-<br>negative, 1-3 involved<br>nodes, and C4 involved<br>nodes), tumor grade (I,<br>II, III, and unknown),<br>tumor size (B2 cm, [2<br>cm, and unknown), and<br>cooperative clinical trial<br>group |
| Iwase, 2014 <sup>297</sup> ,<br>Japan,<br><br>BMI - Excluded                                                                                                                                     | Retrospective<br>cohort study (n=<br>249 )<br>Pre and Post-<br>menopausal<br>Mean age: 50.3<br>years                                                                                                                  | Treatment 2000-<br>2010<br>Follow up= 1,292<br>days                                                                                     | Stage 1: 10%, 2: 56%, 3:<br>13%, 4: 22%<br>Mastectomy 57%,<br>Lumpectomy 43%<br>Chemo taxane 89%,<br>Chemo not taxane 11%                                                                                                                        | BMI before<br>neoadjuvant<br>chemotherapy                                 | Overall survival                                       | ≥30 vs <18.5 kg/m <sup>2</sup>        | 1.69 ( 0.25 - 11.45 )<br><br>P trend=0.25 | Unadjusted                                                                                                                                                                                                                                                                                                                                                                                   |
|                                                                                                                                                                                                  |                                                                                                                                                                                                                       |                                                                                                                                         |                                                                                                                                                                                                                                                  |                                                                           | Disease-free<br>survival                               | ≥30 vs <18.5 kg/m <sup>2</sup>        | 2.72 ( 0.63 - 11.82 )<br><br>P trend=0.06 | Unadjusted                                                                                                                                                                                                                                                                                                                                                                                   |
| Izano M, 2014 <sup>77</sup> ,<br>Health and<br>Functioning in<br>Women (HFW) (2<br>cohorts), United<br>States,<br><br>(also reported<br>results by race)<br><br>BMI – Included,<br>meta-analysis | Prospective<br>cohort study of<br>cancer survivors<br>(n= 975)<br><br>Pre- and post-<br>menopausal<br><br>Mean age: 63.1<br>years<br><br>white 83%<br><br>African American<br>17%<br><br>Response rate<br>81.1%-88.4% | 1984-1985<br><br>1987-1988<br><br>Follow up= 11.3<br>years<br><br>774 deaths<br><br>323 breast cancer<br>deaths<br><br>451 other deaths | Invasive breast cancer<br><br>Stage I-IV<br><br>Local 53.6%<br><br>Regional 40.7%<br><br>Remote 5.6%<br><br>No surgery 2.2%<br><br>Partial mastectomy<br>20.2%<br><br>Modified radical<br>mastectomy 77.6%<br><br>Charlson Comorbidity<br>Score: | Self-reported<br><br>interviewed<br>between 2-4<br>months of<br>diagnosis | 20-year breast<br>cancer-specific<br>mortality (n=323) | Per 1 kg/m <sup>2</sup>               | 1.03 (1.00 - 1.05)                        | Age, comorbidities,<br>hypertension,<br>functional limitation,<br>positive lymph nodes,<br>tumour size, surgery,<br>period of study entry,<br>stage, race, financial<br>adequacy, education,<br>current smoking                                                                                                                                                                              |

|                                                                                       |                                                                                                           |                                           |                                                                                                                                                                                                                                                                              |                                                                             |                                                                    |                                    |                                   |                                                                                        |
|---------------------------------------------------------------------------------------|-----------------------------------------------------------------------------------------------------------|-------------------------------------------|------------------------------------------------------------------------------------------------------------------------------------------------------------------------------------------------------------------------------------------------------------------------------|-----------------------------------------------------------------------------|--------------------------------------------------------------------|------------------------------------|-----------------------------------|----------------------------------------------------------------------------------------|
|                                                                                       |                                                                                                           |                                           | 0: 44.7%, 1: 24.7%,<br>2: 15.5%, 3: 8.2%, 4:<br>4.6%                                                                                                                                                                                                                         |                                                                             |                                                                    |                                    |                                   |                                                                                        |
|                                                                                       |                                                                                                           |                                           |                                                                                                                                                                                                                                                                              |                                                                             | 20-year non-breast-cancer-related mortality (n=451)                | Per 1 kg/m <sup>2</sup>            | 0.98 (0.95 - 1.01)                |                                                                                        |
| Jeon, 2014 <sup>172</sup> , Catholic University of Korea, Korea, BMI - Excluded       | Retrospective cohort study (n=108)                                                                        | Treatment 2005-2010 Follow up=60.2 months | Invasive breast cancer, node-positive, no metastasis<br>Mastectomy 38%<br>Breast-conserving surgery 62%<br>Any hormonal therapy 59.3%                                                                                                                                        | BMI measured prior to surgery 12 and 24 months post-diagnosis weight change | Relapse-free survival (n=16)                                       | ≥25 vs 18.5-22.9 kg/m <sup>2</sup> | 1.0 ( 0.3 - 3.3 )                 | Unadjusted                                                                             |
| Ladoire S, 2014 <sup>181</sup> , PACS01 and PAC04 phase III<br>BMI – Included, review | Secondary analysis of clinical trials (n=4996) Pre and Post-menopausal mean age:50.556.4% pre, 43.6% post | Follow Up: Median 5.9 years               | Tumour grade Unknown: 3% 1: 12.3% 2: 45.1% 3: 39.7%<br>Tumour size (mm): =50 mm: 6% Breast cancer subtypes: HER2+++:18% Triple negative: 12% RE or RP+ and HER2-: 70.1%. Treatment arm: Six FEC: 50.1% Three FEC+ three docetaxel: 20.2% Six (epirubicin + docetaxel): 29.8% | At baseline before initiation of chemotherapy treatment.                    | Disease free survival                                              | >=30 vs <30kg/m <sup>2</sup>       | 1.13 (0.93 -1.37)<br>Ptrend=0.22  | Age, trial, treatment arm, nodal status, size, grade, ER status, PR status, HER status |
|                                                                                       |                                                                                                           |                                           |                                                                                                                                                                                                                                                                              |                                                                             | Overall survival                                                   |                                    | 1.27 (0.98- 1.63)<br>Ptrend=0.069 |                                                                                        |
|                                                                                       |                                                                                                           |                                           |                                                                                                                                                                                                                                                                              |                                                                             | Overall survival 6 FEC                                             | ≥ 30 vs < 30 kg/m <sup>2</sup>     | 1.35 (1.02-1.78)                  |                                                                                        |
|                                                                                       |                                                                                                           |                                           |                                                                                                                                                                                                                                                                              |                                                                             | Overall survival 3 FEC + 3 docetaxel ou 6 (epirubicin + docetaxel) | ≥ 30 vs < 30 kg/m <sup>2</sup>     | 1.42 (1.06-1.31)                  |                                                                                        |
|                                                                                       |                                                                                                           |                                           |                                                                                                                                                                                                                                                                              |                                                                             | Disease-free survival 6 FEC                                        | ≥ 30 vs < 30 kg/m <sup>2</sup>     | 1.17 (0.94-1.46)                  |                                                                                        |
|                                                                                       |                                                                                                           |                                           |                                                                                                                                                                                                                                                                              |                                                                             | Disease-free survival                                              | ≥ 30 vs < 30 kg/m <sup>2</sup>     | 1.19 (0.95-1.50)                  |                                                                                        |

|                                                                                                            |                                                                                                                    |                                                                                                                                                                                      |                                                                                                                                                                                                                                                          |                                                          |                                                                                       |                               |                                    |                                                                                                                                                                                                              |
|------------------------------------------------------------------------------------------------------------|--------------------------------------------------------------------------------------------------------------------|--------------------------------------------------------------------------------------------------------------------------------------------------------------------------------------|----------------------------------------------------------------------------------------------------------------------------------------------------------------------------------------------------------------------------------------------------------|----------------------------------------------------------|---------------------------------------------------------------------------------------|-------------------------------|------------------------------------|--------------------------------------------------------------------------------------------------------------------------------------------------------------------------------------------------------------|
|                                                                                                            |                                                                                                                    |                                                                                                                                                                                      |                                                                                                                                                                                                                                                          |                                                          | 3 FEC + 3 docetaxel ou 6 (epirubicin + docetaxel)                                     |                               |                                    |                                                                                                                                                                                                              |
| Lee SA, 2014 <sup>387</sup> , Korea<br><br>BMI - Excluded                                                  | Female, Retrospective Cohort of Cancer Survivors (n=370), Pre-menopausal 64%, post-menopausal 36%                  | Diagnosed:2004-2007 follow Up: Median 4.2 years                                                                                                                                      | Breast cancer TNM stage 0-I 44.7%, II 36.2%, III-IV 19.0%; ER positive 60.8%, PR positive 56.6%; histologic grade I-II 56.7%, III 43.3%; nuclear grade I-II 57.1%, III 42.9% Adjuvant chemotherapy 67.9%, radiotherapy 59.9%, hormone chemotherapy 66.1% | Medical records                                          | Disease free survival (n=109.0)                                                       | >=25 vs <25 kg/m <sup>2</sup> | 1.03(0.63-1.70)                    | Age, ER status, histological grade, nuclear grade, PR status, TNM stage                                                                                                                                      |
| McLaughlin VH, 2014 <sup>312</sup> , Wisconsin In Situ Cohort (WISC), United States,<br><br>BMI – Excluded | Prospective cohort study of cancer survivors (n= 162)<br><br>Pre and Post-menopausal<br><br>Age range: 20-74 years | Diagnosed 1997-2006<br><br>Follow up= 6.7 years<br><br>162 second breast cancer events of the 117 events confirmed via pathology report: 57 (49%) invasive and 60 (51%) were in situ | DCIS patients<br><br>Ipsilateral mastectomy 30.8%<br><br>Bilateral mastectomy 4.2%, BSC without radiation 9.1%<br><br>BCS with radiation 42.9%<br><br>Biopsy only 2.6%                                                                                   | Questionnaire, recalled information 1 year pre-diagnosis | Self-reported, 72% confirmed by pathology reports<br><br>Second breast cancer (n=162) | Q3 vs Q1 kg/m <sup>2</sup>    | 1.15 (0.52 - 2.13)<br>P trend=0.21 | Age at diagnosis, menopausal status, mode of detection, Treatment, postmenopausal hormone use, tamoxifen use, year of diagnosis, tumour size and grade, lifetime alcohol intake, remaining lifestyle factors |
|                                                                                                            |                                                                                                                    |                                                                                                                                                                                      |                                                                                                                                                                                                                                                          |                                                          | Second breast cancer (n=162)                                                          | Per 1 kg /m <sup>2</sup>      | 1.03 (0.97 - 1.1)                  |                                                                                                                                                                                                              |
|                                                                                                            |                                                                                                                    |                                                                                                                                                                                      |                                                                                                                                                                                                                                                          |                                                          | Second breast cancer (n=74) Pre-menopausal                                            | Q3 vs Q1 kg/m <sup>2</sup>    | 1.14 (0.33 - 3.92)<br>P trend=0.44 |                                                                                                                                                                                                              |
|                                                                                                            |                                                                                                                    |                                                                                                                                                                                      |                                                                                                                                                                                                                                                          |                                                          | Second breast cancer(n=74) Pre-menopausal                                             | Per 1 kg /m <sup>2</sup>      | 1.04 (0.95 - 1.13)                 |                                                                                                                                                                                                              |

|                                                                                                                                   |                                                                                                                      |                                                                                                                                 |                                   |                                                     |                                                         |                                         |                                    |                                                                                                                                               |
|-----------------------------------------------------------------------------------------------------------------------------------|----------------------------------------------------------------------------------------------------------------------|---------------------------------------------------------------------------------------------------------------------------------|-----------------------------------|-----------------------------------------------------|---------------------------------------------------------|-----------------------------------------|------------------------------------|-----------------------------------------------------------------------------------------------------------------------------------------------|
|                                                                                                                                   |                                                                                                                      |                                                                                                                                 |                                   |                                                     | Second breast cancer (n=88)<br>Post-menopausal          | Q3 vs Q1 kg/m <sup>2</sup>              | 1.21 (0.42 - 2.45)<br>P trend=0.22 |                                                                                                                                               |
|                                                                                                                                   |                                                                                                                      |                                                                                                                                 |                                   |                                                     | Second breast cancer (n=88)<br>Post-menopausal          | Per 1 kg/m <sup>2</sup>                 | 1.03 (0.94 - 1.12)                 |                                                                                                                                               |
|                                                                                                                                   |                                                                                                                      |                                                                                                                                 |                                   |                                                     | invasive breast cancer(n=57)                            | Q3 vs Q1 kg/m <sup>2</sup>              | 1.34 (0.44 - 4.07)<br>P trend=0.64 |                                                                                                                                               |
|                                                                                                                                   |                                                                                                                      |                                                                                                                                 |                                   |                                                     | Second invasive breast cancer(n=57)                     | Per 1 kg /m <sup>2</sup>                | 1 (0.9 - 1.11)                     |                                                                                                                                               |
|                                                                                                                                   |                                                                                                                      |                                                                                                                                 |                                   |                                                     | Second invasive breast cancer (n=24)<br>Pre-menopausal  | Q3 vs Q1 kg/m <sup>2</sup>              | 0.5 (0.05 - 5.42)<br>P trend=0.43  |                                                                                                                                               |
|                                                                                                                                   |                                                                                                                      |                                                                                                                                 |                                   |                                                     | Second invasive breast cancer (n=24)<br>pre-menopausal  | Per 1 kg / m <sup>2</sup>               | 0.95 (0.82 - 1.13)                 |                                                                                                                                               |
|                                                                                                                                   |                                                                                                                      |                                                                                                                                 |                                   |                                                     | Second invasive breast cancer (n=33)<br>Post-menopausal | Q3 vs Q1 kg/m <sup>2</sup>              | 2.39 (0.57 - 10.1)<br>P trend=0.22 |                                                                                                                                               |
|                                                                                                                                   |                                                                                                                      |                                                                                                                                 |                                   |                                                     | Second invasive breast cancer (n=33)<br>Post-menopausal | Per 1 kg /m <sup>2</sup>                | 1.03 (0.9 -1.18)                   |                                                                                                                                               |
| Robinson PJ, 2014 <sup>196</sup> , Bupa Health Foundation Health and Wellbeing after Breast Cancer Study (BUPA study), Australia, | Prospective cohort of cancer survivors (n= 1199, 1155 in analysis)<br>Pre- and postmenopausal<br>Mean age 58.4 years | 2004-2006<br>Follow up= 5.6 years<br>98 events<br>(78 recurrence or second primary breast cancer<br>20 breast cancer mortality) | HR+, HER2- invasive breast cancer | Self-reported, about BMI 9.4 months after diagnosis | Additional breast cancer events(n=98)                   | ≥ 30-39.9 vs 25-29.9 kg/ m <sup>2</sup> | 1.71 ( 1.12 - 2.62 )               | Age, HRT use at diagnosis, type of surgery, stage, cancer type (Lobular/Ductal), radiotherapy, chemotherapy, oral adjuvant endocrine therapy. |

|                                                                                                                                              |                                                                                                                                  |                                                                                               |                                                                             |                                                                  |                                                     |                               |                               |                                                                   |
|----------------------------------------------------------------------------------------------------------------------------------------------|----------------------------------------------------------------------------------------------------------------------------------|-----------------------------------------------------------------------------------------------|-----------------------------------------------------------------------------|------------------------------------------------------------------|-----------------------------------------------------|-------------------------------|-------------------------------|-------------------------------------------------------------------|
| BMI – Included, review                                                                                                                       | Recruited within 12 m of diagnosis                                                                                               |                                                                                               |                                                                             |                                                                  |                                                     |                               |                               |                                                                   |
| Tait, 2014 <sup>111</sup> , United States,<br><br>BMI – Included, meta-analysis (mortality)<br>Included, review (recurrence)                 | Retrospective cohort study (n= 448)<br><br>Age range: 23-98 years<br><br>Pre- and post-menopausal                                | Diagnosed: 2006 - 2010<br><br>Follow up= 40.1 months<br><br>154 deaths<br><br>136 recurrences | Triple-negative breast cancer                                               | From records at diagnosis                                        | All-cause mortality(n=154)                          | ≥35 vs <25 kg/m <sup>2</sup>  | 1.16 (0.70 - 1.90)            | Tumour stage, chemotherapy                                        |
|                                                                                                                                              |                                                                                                                                  |                                                                                               |                                                                             |                                                                  | Disease-free survival<br><br>stage IV breast cancer | ≥35 vs <25 kg/m <sup>2</sup>  | 0.99 (0.63 - 1.57)            |                                                                   |
| Vici P, 2014 <sup>388</sup> , USA<br><br>BMI - Excluded                                                                                      | Female, Retrospective Cohort of Cancer Survivors (n=106)                                                                         | Follow Up: Median 28.8 months , Loss to Follow-up: 12.2%                                      | HER2-positive breast cancer Trastuzumab                                     | Other                                                            | Progression-free survival                           | Per kg m <sup>2</sup>         | 1.02(0.89-1.18) P trend=0.743 | Age at diagnosis, other factors, p53 mutation                     |
| Williams PT, 2014 <sup>117</sup> , National Runners' and Walkers' Health Surveys (NRWHS), United States<br><br>BMI – Included, meta-analysis | Population-based study (n= 986)<br><br>Pre- and postmenopausal runners (n= 272) or walkers (n= 714)<br><br>Caucasian 90.35%-100% | Recruited: 1998-2001<br><br>Follow up= 9.1 years<br><br>46 breast cancer deaths               | Self-reported breast cancer, no other clinical and pathological information | Self-reported in questionnaire, average 7.9 years post-diagnosis | Breast cancer-specific mortality(n=46)              | Per 1 kg/m <sup>2</sup>       | 1.014 (0.953 - 1.070)         | Age, race, exercise (runner vs walker)                            |
| Xiao Y, 2014 <sup>134</sup> , China                                                                                                          | Female, Retrospective Cohort of Cancer Survivors                                                                                 | Diagnosed:2002-2006 follow Up: Median 70                                                      | Luminal-type breast cancer                                                  | Medical records                                                  | Luminal a Cancer specific mortality (n=127.0)       | >=30 vs <25 kg/m <sup>2</sup> | 0.76(0.52-1.11) P=0.155       | Age, cardiovascular comorbidity, chemotherapy, endocrine therapy, |

|                                                            |                                                                                                                   |                                |                                                                                                                                                                                                                                                                                                                                                                                                      |                 |                                                              |                                |                            |                                                                                                                                                                                                           |
|------------------------------------------------------------|-------------------------------------------------------------------------------------------------------------------|--------------------------------|------------------------------------------------------------------------------------------------------------------------------------------------------------------------------------------------------------------------------------------------------------------------------------------------------------------------------------------------------------------------------------------------------|-----------------|--------------------------------------------------------------|--------------------------------|----------------------------|-----------------------------------------------------------------------------------------------------------------------------------------------------------------------------------------------------------|
| BMI – Included, meta-analysis                              | (n=5785) , Cancer Diagnosis: 2002-2006                                                                            | months                         |                                                                                                                                                                                                                                                                                                                                                                                                      |                 | Luminal b and high ki67 Cancer specific mortality (n=371.0)  |                                | 1.04(0.85-1.29)<br>P=0.695 | menopausal status, number of lymph nodes, other factors, stage<br><br>Age, cardiometabolic abnormalities, chemotherapy, endocrine therapy, menopausal status, number of lymph nodes, other factors, stage |
|                                                            |                                                                                                                   |                                |                                                                                                                                                                                                                                                                                                                                                                                                      |                 | Luminal b and her-2/neu+ Cancer specific mortality (n=172.0) |                                | 1.23(0.89-1.69)<br>P=0.212 |                                                                                                                                                                                                           |
|                                                            |                                                                                                                   |                                |                                                                                                                                                                                                                                                                                                                                                                                                      |                 |                                                              |                                |                            |                                                                                                                                                                                                           |
| Ampil F, 2013 <sup>389</sup><br>USA<br><br>BMI - Excluded  | Female, Retrospective Cohort of Cancer Survivors (n=100) mean age:58.5                                            | Follow Up: Median 96 months    | Early stage breast cancer with tumor-free surgical margins; estrogen-positive 44%, progesterone-positive 42%, HER-2 neu-positive 19% Breast-conserving surgery and irradiation; adjuvant chemotherapy 53%                                                                                                                                                                                            | Medical records | Overall survival                                             | ≥35 vs <35 kg/m <sup>2</sup>   | Log rank P=0.02            |                                                                                                                                                                                                           |
|                                                            |                                                                                                                   |                                |                                                                                                                                                                                                                                                                                                                                                                                                      |                 | Disease free survival                                        |                                | Log rank P=0.66            |                                                                                                                                                                                                           |
|                                                            |                                                                                                                   |                                |                                                                                                                                                                                                                                                                                                                                                                                                      |                 | Recurrence                                                   |                                | Log rank P=0.29            |                                                                                                                                                                                                           |
|                                                            |                                                                                                                   |                                |                                                                                                                                                                                                                                                                                                                                                                                                      |                 | Local recurrence                                             |                                | Log rank P=0.99            |                                                                                                                                                                                                           |
| Asaga S, 2013 <sup>383</sup> , Japan<br><br>BMI - Excluded | Female, Retrospective Cohort of Cancer Survivors (n=135) mean age:54 Premenopausal 57, postmenopausal 78 patients | Diagnosed:200-2009 (treatment) | Triple-negative breast cancer. 123 underwent both anthracycline (A) and taxane (T) containing (A+T) regimens, 5 patients had an A regimen only, and 7 patients had a T. 94 out of 123 patients (76%) receiving A+T regimens completed the scheduled treatment, 4 out of 5 patients (80%) given the A regimen and 6 out of 7 patients (86%) given the T regimen completed the treatment regimen only. | Medical records | Cancer specific mortality (n=37)                             | ≥25 vs <18.5 kg/m <sup>2</sup> | 0.70(0.20-3.27)            | Unadjusted                                                                                                                                                                                                |
|                                                            |                                                                                                                   |                                |                                                                                                                                                                                                                                                                                                                                                                                                      |                 | Disease free survival (n=41)                                 |                                | 0.76(0.21-3.54)            |                                                                                                                                                                                                           |

|                                                                                                                                      |                                                                                                                                                                                                |                                                                                                                    |                                                                                                                                             |                                                                                            |                                      |                                               |                                                                                                                                                                                |                                                                                                                                 |
|--------------------------------------------------------------------------------------------------------------------------------------|------------------------------------------------------------------------------------------------------------------------------------------------------------------------------------------------|--------------------------------------------------------------------------------------------------------------------|---------------------------------------------------------------------------------------------------------------------------------------------|--------------------------------------------------------------------------------------------|--------------------------------------|-----------------------------------------------|--------------------------------------------------------------------------------------------------------------------------------------------------------------------------------|---------------------------------------------------------------------------------------------------------------------------------|
| Biglia, 2013 <sup>268</sup> , Italy,<br>BMI - Excluded                                                                               | Retrospective cohort study (n= 2148 )<br>Pre- and post-menopausal                                                                                                                              | Treatment: 1999-2009 Follow up= 60 months                                                                          | Invasive breast cancer, no metastasis<br>All underwent breast cancer surgery                                                                | BMI before surgery                                                                         | Distant recurrence post-menopausal   | Over/obese vs under/normal weight             | Log rank P = 0.017                                                                                                                                                             |                                                                                                                                 |
| Borgquist, 2013 <sup>271</sup> , Breast Cancer and Blood cohort (BC Blood Study), Sweden,<br>BMI - Excluded                          | Prospective cohort study (n= 634 )<br>Pre and post-menopausal<br>Mean age:59.6 years                                                                                                           | 2002-2008 Follow up= 4.92 years                                                                                    | In situ 14 cases Invasive 620 cases<br>ER+ 86.7%<br>ER- 13.3%<br>PR+ 69.4%<br>PR- 30.6%<br>Histological grade: I 157, II 308, III 126 cases | Measured at prior to surgery                                                               | Breast cancer haplotype TCAC         |                                               | A significant interaction was observed between htSNP1 and BMI on disease-free survival (P interaction = 0.015).                                                                |                                                                                                                                 |
| Chen Y, 2013 <sup>397</sup> , Shanghai Breast Cancer Survival Study (SBCSS), China<br>BMI - Excluded                                 | Female, Prospective Cohort of Cancer Survivors (n=4842) mean age:53.3 Pre and postmenopausal Chinese                                                                                           | Diagnosed:2002-2006 follow Up: Median 5.3 years , Loss to Follow-up: Not reported                                  | Primary breast cancer. Stage 0-III.                                                                                                         | FFQ Measured                                                                               | Breast cancer recurrence (n=720)     | Obese vs Non-morbidly obese kg/m <sup>2</sup> | Being overweight/obese or not did not significantly modify the associations between menopausal symptoms experience and breast cancer recurrence<br><br>P interaction=0.18-0.97 | Age at diagnosis, comorbidity, education, er/pr status, marital status, number of parity, quality of life, tnm stage, treatment |
| Connor AE, 2013 <sup>57</sup> , New Mexico Women's Health Study (NMWHS), New Mexico, United States,<br>BMI – Included, meta-analysis | Follow-up of cases in case-control study (n= 577)<br><br>Pre- and postmenopausal<br><br>Mean age: 53.2 years<br><br>Hispanic and non-Hispanic white<br><br>Response rate in original study 73% | 1992-1994 Follow up= 13 years<br><br>215 deaths<br><br>129 breast cancer deaths<br><br>87 non-breast cancer deaths | Invasive breast cancer                                                                                                                      | Self-reported in interview, median 193 days post-diagnosis (Gilliland, 2001, PMID11532786) | All-cause mortality (n=100) Hispanic | ≥30 vs ≤24.9 kg/m <sup>2</sup>                | 1.23 (0.71 - 2.12)<br><br>P trend=0.47                                                                                                                                         | Age, history of high blood pressure, history of stroke, smoking status, total METs, and total daily energy intake               |



|                                                                  |                                                                   |                                                                                                                                     |                                                                                                                                              |              |                                                               |                                |                                    |                                                                                                                                        |
|------------------------------------------------------------------|-------------------------------------------------------------------|-------------------------------------------------------------------------------------------------------------------------------------|----------------------------------------------------------------------------------------------------------------------------------------------|--------------|---------------------------------------------------------------|--------------------------------|------------------------------------|----------------------------------------------------------------------------------------------------------------------------------------|
|                                                                  |                                                                   |                                                                                                                                     |                                                                                                                                              |              | All-cause mortality (n=101)<br>Non-Hispanic white             | ≥30 vs ≤24.9 kg/m <sup>2</sup> | 2.12 (1.15 - 3.90)<br>P trend=0.03 |                                                                                                                                        |
|                                                                  |                                                                   |                                                                                                                                     |                                                                                                                                              |              | Breast cancer-specific mortality (n=61) Hispanic              | ≥30 vs ≤24.9 kg/m <sup>2</sup> | 1.32 (0.64 - 2.74)<br>P trend=0.50 | BMI at age 18, total METs, duration of oestrogen use, breast cancer stage, total daily energy intake, and post-breast cancer diagnosis |
|                                                                  |                                                                   |                                                                                                                                     |                                                                                                                                              |              | Breast cancer-specific mortality (n=59)<br>Non-Hispanic white | ≥30 vs ≤24.9 kg/m <sup>2</sup> | 2.07 (0.98 - 4.35)<br>P trend=0.09 |                                                                                                                                        |
|                                                                  |                                                                   |                                                                                                                                     |                                                                                                                                              |              | Non-breast-cancer deaths (n=37) Hispanic                      | ≥30 vs ≤24.9 kg/m <sup>2</sup> | 2.18 (0.77 - 6.10)<br>P trend=0.15 | Age, history of high blood pressure, history of stroke, smoking status, total METs, and total daily energy intake                      |
|                                                                  |                                                                   |                                                                                                                                     |                                                                                                                                              |              | Non-breast-cancer-deaths (n=41)<br>Non-Hispanic white         | ≥30 vs ≤24.9 kg/m <sup>2</sup> | 2.65 (0.9 - 7.81)<br>P trend=0.15  |                                                                                                                                        |
| Contiero, 2013 <sup>155</sup> , Italy,<br>BMI – Included, review | Retrospective cohort study (n= 1261 )<br>Pre- and post-menopausal | 1996, 1999-2000<br>Follow up= 9.5 years<br>317 deaths<br>400 recurrences<br>107 loco-regional recurrences<br>293 distant metastases | Invasive breast cancer, no metastasis<br>all 481 Stage I 564 stage II 216 stage III 836 PR+ 383 PR- 42 Unknown<br>965 ER+ 253 ER- 43 Unknown | From records | all-cause mortality(n=317)                                    | ≥25 vs <25 kg/m <sup>2</sup>   | 1.16 ( 0.88 - 1.53 )               | menopausal status, estrogen receptor level, progesterone receptor level, stage, Age, fasting glucose                                   |

|                                                                                                                                               |                                                                                                                                         |                                                                                                                            |                                                                                                                                                                                |                                                                                                        |                                                     |                                  |                                                                                  |                                                                          |
|-----------------------------------------------------------------------------------------------------------------------------------------------|-----------------------------------------------------------------------------------------------------------------------------------------|----------------------------------------------------------------------------------------------------------------------------|--------------------------------------------------------------------------------------------------------------------------------------------------------------------------------|--------------------------------------------------------------------------------------------------------|-----------------------------------------------------|----------------------------------|----------------------------------------------------------------------------------|--------------------------------------------------------------------------|
|                                                                                                                                               |                                                                                                                                         |                                                                                                                            |                                                                                                                                                                                |                                                                                                        | Breast cancer recurrence(n=400 )                    | ≥25 vs <25 kg/m <sup>2</sup>     | 1.38 ( 1.03 - 1.84 )                                                             |                                                                          |
|                                                                                                                                               |                                                                                                                                         |                                                                                                                            |                                                                                                                                                                                |                                                                                                        | Distant metastases(n=293 )                          | ≥25 vs <25 kg/m <sup>2</sup>     | 1.49 ( 1.1 – 2.00 )                                                              |                                                                          |
| Crozier JA, 2013 <sup>59</sup> , North Central Cancer Treatment Group trial (NCCTG) N9831, International<br><br>BMI – Included, meta-analysis | Secondary analysis of clinical trial (n= 3017)<br><br>Pre- and postmenopausal<br>Age range: 18-82<br><br>116 patients loss to follow-up | Follow up= 5.3 years in disease-free women<br><br>360 deaths<br>292 breast cancer deaths<br><br>647 disease-related events | HER2+, early stage, lymph node-positive or high-risk lymph node-negative<br><br>AC <sup>2</sup> P and either no trastuzumab, sequential trastuzumab, or concurrent trastuzumab | BMI prior to treatment<br><br>calculated from body surface area (BSA) and weight obtained from records | Disease-free survival (n=647)                       | ≥30 vs <25kg/m <sup>2</sup>      | 1.28 (1.05 - 1.55)<br><br>P trend=0.025                                          | Stratified by HR status and lymph node status; adjusted for age and race |
|                                                                                                                                               |                                                                                                                                         |                                                                                                                            |                                                                                                                                                                                |                                                                                                        | Disease-free survival<br><br>No trastuzumab         | ≥30 vs <25kg/m <sup>2</sup>      | 1.11 (0.83-1.50)<br><br>P trend = 0.54                                           |                                                                          |
|                                                                                                                                               |                                                                                                                                         |                                                                                                                            |                                                                                                                                                                                |                                                                                                        | Disease-free survival<br><br>Sequential trastuzumab | ≥30 vs <25kg/m <sup>2</sup>      | 1.42 (1.00-2.01)<br><br>P trend = 0.10<br><br>P interaction=0.24                 |                                                                          |
|                                                                                                                                               |                                                                                                                                         |                                                                                                                            |                                                                                                                                                                                |                                                                                                        | Disease-free survival<br><br>Concurrent trastuzumab | ≥30 vs <25kg/m <sup>2</sup>      | 1.23 (0.84-1.81)<br><br>P trend = 0.54<br><br>P interaction not significant=0.69 |                                                                          |
|                                                                                                                                               |                                                                                                                                         |                                                                                                                            |                                                                                                                                                                                |                                                                                                        | Distant disease-free survival (n=136)               | ≥31.1 vs ≤23.2 kg/m <sup>2</sup> | 1.15 ( 0.85 - 1.57 )<br><br>P trend=0.66                                         | Age, tumour stage, tumour grade, hormone receptor status, adjuvant       |

|                                                                                                                                                             |                                                                                                              |                                                                                 |                                                                                                                                                |                                                   |                                                |                                     |                                   |                                                                                                           |
|-------------------------------------------------------------------------------------------------------------------------------------------------------------|--------------------------------------------------------------------------------------------------------------|---------------------------------------------------------------------------------|------------------------------------------------------------------------------------------------------------------------------------------------|---------------------------------------------------|------------------------------------------------|-------------------------------------|-----------------------------------|-----------------------------------------------------------------------------------------------------------|
|                                                                                                                                                             |                                                                                                              |                                                                                 |                                                                                                                                                |                                                   |                                                |                                     |                                   | chemotherapy,<br>hormonal therapy                                                                         |
| Gennari A, 2013 <sup>70</sup> , Eastern Cooperative Oncology Group Performance Status (ECOG-PS) Italian trials, Italy,<br><br>BMI – Included, meta-analysis | Secondary analysis of three clinical trials (n=489)<br><br>Pre- and postmenopausal<br><br>Mean age: 57 years | 2000-2005<br><br>Follow up= 18 months<br><br>218 deaths<br><br>385 progressions | Metastatic breast cancer<br><br>Metastatic site: Viscera 57%<br><br>Non-viscera 43%<br><br>HR+ 52%<br><br>HR- 23%<br><br>HR status unknown 26% | From record, height and weight prior to treatment | Overall survival(n=218)                        | ≥30 vs <25 kg/m <sup>2</sup>        | 1.05 (0.73 - 1.49)<br>P trend=0.8 | Age, menopausal status, WHO performance status, hormonal status, site, and number of metastases and trial |
|                                                                                                                                                             |                                                                                                              |                                                                                 |                                                                                                                                                |                                                   | Progression-free survival (n=385)              | ≥30 vs <25 kg/m <sup>2</sup>        | 0.91 (0.69 - 1.19)<br>P trend=0.3 |                                                                                                           |
| Gnant, 2013 <sup>291</sup> , ABCSG-06a, United States,<br><br>BMI - Excluded                                                                                | Retrospective cohort study (n=634 ) Post-menopausal mean age:66.4                                            | Follow up= 73.2 months                                                          | Hormone-receptor positive breast cancer                                                                                                        | From records, prior to extended hormone therapy   | Overall survival                               | ≥ 25 vs 18.4-24.9 kg/m <sup>2</sup> | 0.77 ( 0.49 - 1.28 )              | Age, Nodal status, Tumor grade, Tumor stage, ER/PR status,                                                |
|                                                                                                                                                             |                                                                                                              |                                                                                 |                                                                                                                                                |                                                   | Disease-free survival                          | ≥ 25 vs 18.4-24.9 kg/m <sup>2</sup> | 0.89 ( 0.55 - 1.12 )              |                                                                                                           |
|                                                                                                                                                             |                                                                                                              |                                                                                 |                                                                                                                                                |                                                   | Distant recurrence-free survival               | ≥ 25 vs 18.4-24.9 kg/m <sup>2</sup> | 1.29 ( 0.61 - 2.76 )              |                                                                                                           |
|                                                                                                                                                             |                                                                                                              |                                                                                 |                                                                                                                                                |                                                   | Overall survival<br>3-year<br>Anastrozole      | ≥ 25 vs 18.4-24.9 kg/m <sup>2</sup> | 0.71 (0.27-1.86)                  |                                                                                                           |
|                                                                                                                                                             |                                                                                                              |                                                                                 |                                                                                                                                                |                                                   | Overall survival<br>No treatment               | ≥ 25 vs 18.4-24.9 kg/m <sup>2</sup> | 0.67 (0.34-1.35)                  |                                                                                                           |
|                                                                                                                                                             |                                                                                                              |                                                                                 |                                                                                                                                                |                                                   | Disease-free survival<br>3-year<br>Anastrozole | ≥ 25 vs 18.4-24.9 kg/m <sup>2</sup> | 1.27 (0.65-2.46)                  |                                                                                                           |

|                                                                                                         |                                                                                                             |                                                                                  |                                                                                                                                                                               |                |                                                                 |                                     |                             |                                                                                                                                                                                                |
|---------------------------------------------------------------------------------------------------------|-------------------------------------------------------------------------------------------------------------|----------------------------------------------------------------------------------|-------------------------------------------------------------------------------------------------------------------------------------------------------------------------------|----------------|-----------------------------------------------------------------|-------------------------------------|-----------------------------|------------------------------------------------------------------------------------------------------------------------------------------------------------------------------------------------|
|                                                                                                         |                                                                                                             |                                                                                  |                                                                                                                                                                               |                | Disease-free survival<br>No treatment                           | ≥ 25 vs 18.4-24.9 kg/m <sup>2</sup> | 0.68 (0.42-1.10)            |                                                                                                                                                                                                |
|                                                                                                         |                                                                                                             |                                                                                  |                                                                                                                                                                               |                | Distant recurrence-free survival<br>3-year<br>Anastrozole       | ≥ 25 vs 18.4-24.9 kg/m <sup>2</sup> | 3.41 (0.74-15.75)           |                                                                                                                                                                                                |
|                                                                                                         |                                                                                                             |                                                                                  |                                                                                                                                                                               |                | Distant recurrence-free survival<br>No treatment                | ≥ 25 vs 18.4-24.9 kg/m <sup>2</sup> | 0.79 (0.33-1.97)            |                                                                                                                                                                                                |
|                                                                                                         |                                                                                                             |                                                                                  |                                                                                                                                                                               |                | Overall survival; treated or not treated                        |                                     | P interaction= 0.17         |                                                                                                                                                                                                |
| Hartog H, 2013 <sup>135</sup> , Netherlands<br><br>BMI – Included, meta-analysis                        | Female, Prospective Cohort of Cancer Survivors (n=582) mean age:56.8Pre-menopausal 29%, post-menopausal 71% | Average follow up=5.5 years                                                      | Breast cancer pathological T stage T1 61%, T2 31%, T3 3%, T4 2%; grade I 25%, II 48%, III 27%; distant metastasis 1% Radiotherapy 83%, chemotherapy 27%, hormonal therapy 27% | Self-reported  | Overall survival (n=36)                                         | Per 1 kg m <sup>2</sup>             | 1.03(0.95-1.10) P trend=0.5 | Age, distant metastasis, hormonal therapy, igfbp3, oc use, radiotherapy, tumor grade, tumor size                                                                                               |
| Hou, 2013 <sup>75</sup> , Tianjin Medical University Study, China,<br><br>BMI – Included, meta-analysis | Retrospective cohort study (n= 5634) age range: 35-65 years<br><br>Pre and post-menopausal                  | Median follow up= 68 months (10-120 months) 1,424 patients died of breast cancer | Invasive breast cancer                                                                                                                                                        | From records   | Breast cancer survival (n=5634)<br><br>5-year survival estimate | >30 vs <25 kg/m <sup>2</sup>        | 0.96 (0.84-1.10)            | Age, menopausal status, pT stage, lymph nodes, vessel carcinoma embolus, ER status, PR status, HER2 status, cardio-cerebrovascular complications, (non)metformin-treated, chemotherapy regimen |
| Jiralerspong, 2013 <sup>79</sup> , MD                                                                   | Retrospective cohort study (n=                                                                              | Treatment 1996-2005 Follow up=                                                   | Invasive breast cancer, Stage I/II 93%, III 7%                                                                                                                                | No description | Overall survival                                                | ≥30 vs <25 kg/m <sup>2</sup>        | 1.24 (1.04 - 1.48)          | Age, race, diabetes status, comorbidity,                                                                                                                                                       |

|                                                                                                         |                                                                                                                     |                                                                                     |                                                                                                                                                                                                                 |                 |                                                           |                               |                           |                                                                                          |
|---------------------------------------------------------------------------------------------------------|---------------------------------------------------------------------------------------------------------------------|-------------------------------------------------------------------------------------|-----------------------------------------------------------------------------------------------------------------------------------------------------------------------------------------------------------------|-----------------|-----------------------------------------------------------|-------------------------------|---------------------------|------------------------------------------------------------------------------------------|
| Anderson Cancer Center (MDACC), Texas Review Study, United States,<br><br>BMI – Included, meta-analysis | 6342) mean age:53 years<br><br>Pre- and post-menopausal                                                             | 5.4 years 1175 recurrences, 951 deaths, with 673 deaths due to breast cancer        | ER+/PR+ 77%<br>ER and PR- 23%<br>HER2+ 21%<br>HER2-79%<br>Chemotherapy: 56%<br>(41% anthracycline-based, 50% taxane-based)<br>Endocrine therapy: 63%<br>(46% tamoxifen, 29% AI, 25% both)                       |                 |                                                           |                               |                           | stage, nuclear grade, ER or PR status, adjuvant chemotherapy, adjuvant endocrine therapy |
|                                                                                                         |                                                                                                                     |                                                                                     |                                                                                                                                                                                                                 |                 | Breast cancer-specific mortality                          | ≥30 vs <25 kg/m <sup>2</sup>  | 1.23 (1.00 - 1.52)        |                                                                                          |
|                                                                                                         |                                                                                                                     |                                                                                     |                                                                                                                                                                                                                 |                 | Recurrence-free survival                                  | ≥30 vs <25 kg/m <sup>2</sup>  | 1.13 (0.98 - 1.31)        |                                                                                          |
| Kaviani A, 2013 <sup>249</sup> , Iran<br><br>BMI – Included, review                                     | Female, Retrospective Cohort of Cancer Survivors (n=646) mean age:49.62 (n): Per-menopause 324, Post-menopause 322. | Diagnosed:2003-2011. Follow Up: Median 1.92 years                                   | Breast cancer. Estrogen receptor (n): Negative 99, Positive 210, Unknown 15. Progesterone receptor (n): Negative 104, Positive 187, Unknown 33. HER2 (n): Negative 121, Positive 108, Unknown 95. Not reported. | Medical records | Disease free survival                                     | >=30 vs <25 kg/m <sup>2</sup> | 3.32(1.23-9.02)           | Estrogen receptor status, tumor size                                                     |
| Kim JY, 2013 <sup>398</sup> , South Korea<br><br>BMI - Excluded                                         | Female, Retrospective Cohort of Cancer Survivors (n=313) Postmenopausal                                             | Diagnosed:Treatment: 2006-2008 follow Up: Median 52 months , Loss to Follow-up: Not | Invasive breast cancer. Histologic grade 1 or 2 131, grade 3 153, unknown 29. ER+ 190, ER- 123. PR+ 133, PR- 180. HER2/neu status+                                                                              | Medical records | Estrogen receptor positive Metastasis-free survival (n=7) | ≥23 vs <23 kg/m <sup>2</sup>  | 1.22(0.52-2.86)<br>P=0.64 | Unadjusted                                                                               |

|                                                                                 |                                                                       |                                                                   |                                                                                                                                                                                                                                                                        |                                     |                                                                     |                              |                           |                                                               |
|---------------------------------------------------------------------------------|-----------------------------------------------------------------------|-------------------------------------------------------------------|------------------------------------------------------------------------------------------------------------------------------------------------------------------------------------------------------------------------------------------------------------------------|-------------------------------------|---------------------------------------------------------------------|------------------------------|---------------------------|---------------------------------------------------------------|
|                                                                                 |                                                                       | reported                                                          | 45, - 246, unknown 22.<br>Surgery (n):<br>Conservation 175,<br>mastectomy 138.<br>(Adjuvant)<br>Chemotherapy yes 182,<br>no 131. Radiotherapy<br>(n) yes 180, no 133.<br>Hormonal therapy (n)<br>SERM 36, AI 137, switch<br>14, no 3.                                  |                                     | Estrogen receptor<br>negative<br>Metastasis-free<br>survival (n=15) |                              | 1.02(0.37-2.82)<br>P=0.97 |                                                               |
| Kneubil, 2013 <sup>303</sup> ,<br>Italy,<br>BMI - Excluded                      | Retrospective<br>cohort study<br>(n=1742 ) mean<br>age:46 years       | Treatment: 1997-<br>2006 Follow up=<br>74 months                  | Invasive breast cancer<br>ER+ 80.2%<br>ER- 19.8%<br>PR+ 67.9%<br>PR- 32.1%<br>All underwent<br>mastectomy<br>No radiotherapy 61.4%<br>IORT radiotherapy<br>25.1%<br>Standard radiotherapy<br>13.5%                                                                     | From records                        | Locoregional<br>recurrence(n=121<br>)                               | ≥25 vs <25 kg/m <sup>2</sup> | 1.66 ( 1.06 - 2.59 )      | Age, subsite, hormonal<br>receptor or status,<br>radiotherapy |
| Loehberg, 2013 <sup>310</sup> ,<br>Germany,<br>BMI - Excluded                   | Retrospective<br>Study (n= 467 )<br>Mean age:58.7<br>years            | 1995-2010<br>Follow up= 1.5<br>years                              | Invasive metastatic<br>breast cancer,<br>diagnosed<br>at any time after the<br>primary diagnosis (liver<br>14.6%, lung 6.2%, bone<br>24.1%, multiple sites<br>26.3 %, other sites 25.0<br>%)<br>Adjuvant chemotherapy<br>59.5 %<br>Adjuvant endocrine<br>therapy 54.5% | No description                      | Overall<br>survival(n=373)                                          | ≥28 vs <23 kg/m <sup>2</sup> | P log-rank test =0.02     | Unadjusted                                                    |
| Mazzarella, 2013 <sup>94</sup> ,<br>European<br>Institute of<br>Oncology (EIO), | Retrospective<br>cohort study (n=<br>1250) Pre and<br>post-menopausal | Clinical data from<br>1995 to 2005<br><br>Follow up= 8.2<br>years | Invasive breast cancer<br>Grade 1-2: 29.3% Grade<br>3: 67.7% Conservative<br>surgery 69.7%,<br>mastectomy 30.3%<br>Radiotherapy 74.1%,<br>chemo 41.4%,                                                                                                                 | Measured during<br>operation period | Overall survival<br>ER positive                                     | ≥30 vs< 25 kg/m <sup>2</sup> | 1.05 (0.53 - 2.09)        | Age, pT, grade, ER, pN,<br>menopause, PVI,<br>surgery         |

|                                                          |                                                         |                                             |                                                                                    |                                                                                  |                                                                 |                                                                                                                          |                                                              |                                                                                                |
|----------------------------------------------------------|---------------------------------------------------------|---------------------------------------------|------------------------------------------------------------------------------------|----------------------------------------------------------------------------------|-----------------------------------------------------------------|--------------------------------------------------------------------------------------------------------------------------|--------------------------------------------------------------|------------------------------------------------------------------------------------------------|
| BMI – Included, meta-analysis                            |                                                         |                                             | hormonotherapy 16.1%, chemo and hormo 33.3% Anthracycline-containing regimen 75.4% |                                                                                  |                                                                 |                                                                                                                          |                                                              |                                                                                                |
|                                                          |                                                         |                                             |                                                                                    |                                                                                  | Overall survival ER negative                                    | ≥30 vs< 25 kg/m <sup>2</sup>                                                                                             | 1.79 (1.03 - 3.1)                                            |                                                                                                |
|                                                          |                                                         |                                             |                                                                                    |                                                                                  | Disease-free survival ER positive                               | ≥30 vs< 25 kg/m <sup>2</sup>                                                                                             | 0.75 (0.43 - 1.31)                                           |                                                                                                |
|                                                          |                                                         |                                             |                                                                                    |                                                                                  | Disease-free survival ER negative                               | ≥30 vs< 25 kg/m <sup>2</sup>                                                                                             | 1.34 (0.84 - 2.13)                                           |                                                                                                |
|                                                          |                                                         |                                             |                                                                                    |                                                                                  | Locoregional recurrence ER positive                             | ≥30 vs< 25 kg/m <sup>2</sup>                                                                                             | 0.38 (0.09 - 1.57)                                           |                                                                                                |
|                                                          |                                                         |                                             |                                                                                    |                                                                                  | Locoregional recurrence ER negative                             | ≥30 vs< 25 kg/m <sup>2</sup>                                                                                             | 0.37 (0.09 - 1.55)                                           |                                                                                                |
|                                                          |                                                         |                                             |                                                                                    |                                                                                  | Distant metastases ER positive                                  | ≥30 vs< 25 kg/m <sup>2</sup>                                                                                             | 0.81 (0.36 - 1.84)                                           |                                                                                                |
|                                                          |                                                         |                                             |                                                                                    |                                                                                  | Distant metastases ER negative                                  | ≥30 vs< 25 kg/m <sup>2</sup>                                                                                             | 2.03 (1.13 - 3.63)                                           |                                                                                                |
| Minicozzi, 2013 <sup>413</sup> , Italy<br>BMI - Excluded | Retrospective cohort study (n=1,607)<br>Age 15-99 years | Diagnosed: 2003-2005<br>Followed until 2008 | Stage T1-3N0M0 45% to M1 6%<br>Chemotherapy 55%<br>Endocrine therapy 66%           | BMI from records, 3 months before diagnosis up to hospital admission for surgery | 5-year breast cancer-specific mortality<br><br>ER+PR+<br>ER-PR- | >27.3 vs 23.5-27.3 kg/m <sup>2</sup><br><br>>27.3 vs 23.5-27.3 kg/m <sup>2</sup><br>>27.3 vs 23.5-27.3 kg/m <sup>2</sup> | 1.30 (0.79-2.12)<br><br>2.90 (1.22-6.91)<br>0.77 (0.34-1.75) | Age, fasting blood glucose, stage, hormone receptor status, chemotherapy and endocrine therapy |

|                                                                                                                                                          |                                                                                                                                              |                                                                                                                                                                     |                                                                                                                                                                                                                                                                           |                                            |                                      |                                   |                      |                                                                                                                                                                                                                                                           |
|----------------------------------------------------------------------------------------------------------------------------------------------------------|----------------------------------------------------------------------------------------------------------------------------------------------|---------------------------------------------------------------------------------------------------------------------------------------------------------------------|---------------------------------------------------------------------------------------------------------------------------------------------------------------------------------------------------------------------------------------------------------------------------|--------------------------------------------|--------------------------------------|-----------------------------------|----------------------|-----------------------------------------------------------------------------------------------------------------------------------------------------------------------------------------------------------------------------------------------------------|
| Mowad, 2013 <sup>390</sup> ,<br>United States,<br><br>BMI – Included,<br>review                                                                          | Retrospective<br>cohort study (n=<br>183 ) Mean<br>age:49.8 years                                                                            | Treatment: 1998-<br>2011<br>Follow up= 42.5                                                                                                                         | Invasive TNBC<br>Excluded stage 4                                                                                                                                                                                                                                         | From records at<br>diagnosis               | all-cause<br>mortality(n=37)         | ≥30 vs< 25 kg/m <sup>2</sup>      | 1.36 ( 0.77 - 2.42 ) | Age at diagnosis, race,<br>tumor grade, T stage, N<br>stage, postmastectomy<br>radiotherapy                                                                                                                                                               |
|                                                                                                                                                          |                                                                                                                                              |                                                                                                                                                                     |                                                                                                                                                                                                                                                                           |                                            | Disease-free<br>survival(n=61)       | ≥30 vs< 25 kg/m <sup>2</sup>      | 1.01 ( 0.67 - 1.52 ) | Unadjusted                                                                                                                                                                                                                                                |
| Natori A, 2013 <sup>391</sup> ,<br>USA, Japan<br><br>BMI - Excluded                                                                                      | Female,<br>Retrospective<br>Cohort of Cancer<br>Survivors (n=406)<br>Post-menopausal<br>52% Mostly<br>White                                  | Diagnosed:2003-<br>2009 follow Up:<br>Median 3.1 years                                                                                                              | Inflammatory breast<br>cancer; nuclear grade 1<br>1%, 2 22%, 3 68%; ER<br>negative 51%, PR<br>negative 65%, HER2<br>positive 31% SLIH:<br>chemotherapy 77.3%,<br>surgery 90.9%,<br>radiotherapy 59.1%<br>MDA: chemotherapy<br>72.4%, surgery 92.4%,<br>radiotherapy 76.6% | Medical records                            | Overall survival                     | >=30 vs <25 kg/m <sup>2</sup>     | 0.60(0.40-0.90)      | Unadjusted                                                                                                                                                                                                                                                |
| Pajares B, 2013 <sup>102</sup> ,<br>GEICAM/9906,<br>9805, 2003-02,<br>and BCIRG 001,<br>International,<br>Spain,<br><br>BMI – Included,<br>meta-analysis | Pooled analysis of<br>4 clinical trials (n=<br>5683)<br><br>Pre- and<br>postmenopausal<br><br>Age range: 20-76<br>years<br><br>98% Caucasian | 1996-2008<br><br>Follow up of<br>patients alive at<br>time of analysis =<br>93.4 months<br><br>818 deaths<br><br>664 breast cancer<br>deaths<br><br>1047 recurrence | Invasive breast cancer<br><br>Chemotherapy:<br><br>anthracyclines and<br>taxane<br><br>2% of obese patients<br>received adjusted<br>dosage<br><br>Overall under-<br>treatment:<br><br>Non-obese 9.4%<br><br>Obese 13.2%<br><br>Severely obese 16.5%                       | Measured prior<br>to adjuvant<br>treatment | 10-year overall<br>mortality (n=818) | 35 vs 18.5-24.9 kg/m <sup>2</sup> | 1.35 (1.06 - 1.72)   | Age, clinical trial,<br>treatment regimen,<br>menopausal status,<br>pathologic primary<br>tumour size,<br>histological grade, type<br>of surgery, HER2 status,<br>overall under-<br>treatment (received a<br>dose lower than 85% of<br>the standard dose) |



|  |  |  |  |  |                                                       |                                   |                    |  |
|--|--|--|--|--|-------------------------------------------------------|-----------------------------------|--------------------|--|
|  |  |  |  |  | 10-year overall mortality<br>No undertreated          | 35 vs 18.5-24.9 kg/m <sup>2</sup> | 1.3 (1.0-1.7)      |  |
|  |  |  |  |  | 10-year overall mortality<br>Undertreated             | 35 vs 18.5-24.9 kg/m <sup>2</sup> | 1.7 (0.9-3.1)      |  |
|  |  |  |  |  | 10-year overall mortality<br>Hormone therapy          | 35 vs 18.5-24.9 kg/m <sup>2</sup> | 1.3 (1.0, 1.8)     |  |
|  |  |  |  |  | 10-year overall mortality<br>No hormone therapy       | 35 vs 18.5-24.9 kg/m <sup>2</sup> | 1.5 (1.1, 2.2)     |  |
|  |  |  |  |  | 10-year breast cancer mortality(n=664)                | 35 vs 18.5-24.9 kg/m <sup>2</sup> | 1.32 (1.00 - 1.74) |  |
|  |  |  |  |  | 10-year breast cancer mortality<br>No undertreated    | 35 vs 18.5-24.9 kg/m <sup>2</sup> | 1.4 (1.0-1.8)      |  |
|  |  |  |  |  | 10-year breast cancer mortality<br>Undertreated       | 35 vs 18.5-24.9 kg/m <sup>2</sup> | 1.3 (0.6-2.8)      |  |
|  |  |  |  |  | 10-year breast cancer mortality<br>Hormone therapy    | 35 vs 18.5-24.9 kg/m <sup>2</sup> | 1.4 (0.9-2.0)      |  |
|  |  |  |  |  | 10-year breast cancer mortality<br>No hormone therapy | 35 vs 18.5-24.9 kg/m <sup>2</sup> | 1.4 (0.9-2.2)      |  |
|  |  |  |  |  | 10-year breast cancer recurrence (n=1047)             | 35 vs 18.5-24.9 kg/m <sup>2</sup> | 1.25 (0.99 - 1.57) |  |

|                                                                                                          |                                                                                                                                       |                                                           |                                                                                                                                                                                                                                                                                             |              |                                                        |                                     |                           |                                      |
|----------------------------------------------------------------------------------------------------------|---------------------------------------------------------------------------------------------------------------------------------------|-----------------------------------------------------------|---------------------------------------------------------------------------------------------------------------------------------------------------------------------------------------------------------------------------------------------------------------------------------------------|--------------|--------------------------------------------------------|-------------------------------------|---------------------------|--------------------------------------|
|                                                                                                          |                                                                                                                                       |                                                           |                                                                                                                                                                                                                                                                                             |              | 10-year breast cancer recurrence<br>No undertreated    | 35 vs 18.5-24.9 kg/m <sup>2</sup>   | 1.3 (1.0-1.6)             |                                      |
|                                                                                                          |                                                                                                                                       |                                                           |                                                                                                                                                                                                                                                                                             |              | 10-year breast cancer recurrence<br>Undertreated       | 35 vs 18.5-24.9 kg/m <sup>2</sup>   | 1.4 (0.7-2.5)             |                                      |
|                                                                                                          |                                                                                                                                       |                                                           |                                                                                                                                                                                                                                                                                             |              | 10-year breast cancer recurrence<br>Hormone therapy    | 35 vs 18.5-24.9 kg/m <sup>2</sup>   | 1.2 (0.9-1.7)             |                                      |
|                                                                                                          |                                                                                                                                       |                                                           |                                                                                                                                                                                                                                                                                             |              | 10-year breast cancer recurrence<br>No hormone therapy |                                     | 1.7 (1.1-2.4)             |                                      |
| Pande Mala, 2013 <sup>390</sup> , Early Stage Breast Cancer Repository cohort, USA<br><br>BMI - Excluded | Female, Retrospective Cohort of Cancer Survivors (n=1029), Cancer (n): Premenopausal 380, Postmenopausal 640, Missing 9. Mostly white | Diagnosed:1985-2000 (treated) follow Up: Median 9.5 years | Unilateral Breast cancer. Stage (n): I 308, II 721. ER/PR (n): Positive 744, Negative 251, Missing 34. Surgery (n): Excision 370, Mastectomy 659. Radiation (n): Yes 435, No 590, Missing 4. Chemotherapy (n): Yes 541, No 483, Missing 5. Hormone therapy (n): Yes 460, No 564, Missing 5. | Measured     | Disease free survival (n=266)                          | Obese vs Normal                     | 0.91(0.67-1.24)<br>P=0.54 | Estrogen receptor status, tumor size |
| Perez, 2013 <sup>319</sup> , United States<br><br>BMI - Excluded                                         | Retrospective cohort study (n=704) Post-menopausal Mean age:55 years                                                                  | 1999-2007 Follow up= 51 months                            | TNBC Stage I-III T1mic/T1: 68% T2/T3: 32% N0:71%; N1mic: 8%; N1:15%; N2/N3: 6%. Chemotherapy: 79% Adjuvant radiation: 85% Lumpectomy boost: 92% Axillary radiation: 3% SCV radiation: 11%                                                                                                   | From records | Overall survival(n=111)                                | ≥25 vs 18.5-<24.9 kg/m <sup>2</sup> | P = 0.963                 | Unadjusted                           |

|                                                                                          |                                                                                                    |                                                                                                                                                                                                                                                              |                                                                                                        |                                        |                                                |                                     |                    |                                                              |
|------------------------------------------------------------------------------------------|----------------------------------------------------------------------------------------------------|--------------------------------------------------------------------------------------------------------------------------------------------------------------------------------------------------------------------------------------------------------------|--------------------------------------------------------------------------------------------------------|----------------------------------------|------------------------------------------------|-------------------------------------|--------------------|--------------------------------------------------------------|
|                                                                                          |                                                                                                    |                                                                                                                                                                                                                                                              |                                                                                                        |                                        | Locoregional recurrence(n=55)                  | ≥25 vs 18.5-<24.9 kg/m <sup>2</sup> | P = 0.740          | Unadjusted                                                   |
|                                                                                          |                                                                                                    |                                                                                                                                                                                                                                                              |                                                                                                        |                                        | Distant recurrence(n=61)                       | ≥25 vs 18.5-<24.9 kg/m <sup>2</sup> | P = 0.840          | Unadjusted                                                   |
| Pfeiler G, 2013 <sup>104</sup> , ABCSG-06, Austria,<br><br>BMI – Included, meta-analysis | Secondary analysis of clinical trial (n= 1509)<br><br>Age range: 41-80 years<br><br>Postmenopausal | Recruitment:1990-1995<br><br>Follow up=censored at 60 months<br><br>162 deaths<br><br>101 breast cancer deaths<br><br>61 non-breast cancer deaths<br><br>431 disease-free survival events<br><br>162 distant recurrence<br><br>22 patients loss to follow-up | Stage I or II invasive ER+ and/or PR+ breast cancer<br><br>Tamoxifen with or without aminoglutethimide | From records, prior to hormone therapy | Overall survival(n=162)                        | ≥30 vs 18.5-24.9 kg/m <sup>2</sup>  | 1.81 (1.12 - 2.91) | Age, stage, treatment, nodal status, grade, ER and PR status |
|                                                                                          |                                                                                                    |                                                                                                                                                                                                                                                              |                                                                                                        |                                        | Overall survival Tamoxifen                     | ≥30 vs 18.5-24.9 kg/m <sup>2</sup>  | 1.41 (0.71 - 2.77) |                                                              |
|                                                                                          |                                                                                                    |                                                                                                                                                                                                                                                              |                                                                                                        |                                        | Overall survival Tamoxifen + aminoglutethimide | ≥30 vs 18.5-24.9 kg/m <sup>2</sup>  | 2.28 (1.16 - 4.51) |                                                              |
|                                                                                          |                                                                                                    |                                                                                                                                                                                                                                                              |                                                                                                        |                                        | Disease-free survival(n=431)                   | ≥30 vs 18.5-24.9 kg/m <sup>2</sup>  | 1.45 (1.03-2.02)   |                                                              |

|                                                                |                                                                             |                                      |                                                                |                  |                                                                                    |                                       |                                 |                                                                                                                                     |
|----------------------------------------------------------------|-----------------------------------------------------------------------------|--------------------------------------|----------------------------------------------------------------|------------------|------------------------------------------------------------------------------------|---------------------------------------|---------------------------------|-------------------------------------------------------------------------------------------------------------------------------------|
|                                                                |                                                                             |                                      |                                                                |                  | Disease-free survival<br>Tamoxifen                                                 | ≥30 vs<br>18.5-24.9 kg/m <sup>2</sup> | 1.15 (0.70 - 1.87)              |                                                                                                                                     |
|                                                                |                                                                             |                                      |                                                                |                  | Disease-free survival<br>Tamoxifen +<br>aminogluthetimi<br>de                      | ≥30 vs<br>18.5-24.9 kg/m <sup>2</sup> | 1.78 (1.12 - 2.83)              |                                                                                                                                     |
|                                                                |                                                                             |                                      |                                                                |                  | Distant<br>recurrence-free<br>survival(n=162)                                      | ≥30 vs<br>18.5-24.9 kg/m <sup>2</sup> | 1.79 (1.11 - 2.87)              |                                                                                                                                     |
|                                                                |                                                                             |                                      |                                                                |                  | Distant<br>recurrence-free<br>survival<br><br>Tamoxifen                            | ≥30 vs<br>18.5-24.9 kg/m <sup>2</sup> | 1.31 (0.66 - 2.60)              |                                                                                                                                     |
|                                                                |                                                                             |                                      |                                                                |                  | Distant<br>recurrence-free<br>survival<br><br>Tamoxifen +<br>aminogluthetimi<br>de | ≥30 vs<br>18.5-24.9 kg/m <sup>2</sup> | 2.43 (1.25 -<br>4.70)           |                                                                                                                                     |
| Turkoz FP, 2013 <sup>206</sup> , Turkey,<br><br>BMI - Excluded | Retrospective<br>cohort of cancer<br>survivors<br>(n= 733)<br>Premenopausal | 2001-2011<br>Follow up= 29<br>months | Nonmetastatic invasive<br>breast cancer<br>Chemotherapy: 89.6% | BMI at admission | Breast cancer-<br>specific<br>mortality(n=157)                                     | ≥ 30 vs 18.5-25 kg/ m <sup>2</sup>    | 1.8 (1.2 - 2.7)<br><br>P =0.006 | Unadjusted                                                                                                                          |
|                                                                |                                                                             |                                      |                                                                |                  | Breast cancer-<br>specific mortality<br>Luminal                                    | ≥ 30 vs 18.5-25 kg/ m <sup>2</sup>    | 1.5 ( 1 - 2.2 )<br><br>P =0.27  | Unadjusted                                                                                                                          |
|                                                                |                                                                             |                                      |                                                                |                  | Breast cancer-<br>specific mortality<br>Triple-negative                            | ≥ 30 vs 18.5-25 kg/ m <sup>2</sup>    | 1.4 ( 1.0-2.1 )<br><br>P =0.04  | Age, tumor size, nodal<br>involvement, grade,<br>lymphovascular<br>invasion, hormone<br>receptor status,<br>extracapsular extension |

|                                                                          |                                                                                                                                                       |                                                                |                                                                                                                                                                                                                                                                                                                                                                                                                                                    |                 |                                                         |                                    |                              |                                                                                                                                                                |
|--------------------------------------------------------------------------|-------------------------------------------------------------------------------------------------------------------------------------------------------|----------------------------------------------------------------|----------------------------------------------------------------------------------------------------------------------------------------------------------------------------------------------------------------------------------------------------------------------------------------------------------------------------------------------------------------------------------------------------------------------------------------------------|-----------------|---------------------------------------------------------|------------------------------------|------------------------------|----------------------------------------------------------------------------------------------------------------------------------------------------------------|
|                                                                          |                                                                                                                                                       |                                                                |                                                                                                                                                                                                                                                                                                                                                                                                                                                    |                 | Breast cancer-specific mortality<br>Her2-overexpressing | ≥ 30 vs 18.5-25 kg/ m <sup>2</sup> | 1.4 ( 1.1 - 2.1 )<br>P =0.07 | Unadjusted                                                                                                                                                     |
|                                                                          |                                                                                                                                                       |                                                                |                                                                                                                                                                                                                                                                                                                                                                                                                                                    |                 | Breast cancer recurrence(n=236 )                        | ≥ 30 vs 18.5-25 kg/ m <sup>2</sup> | 1.5 (1.1 - 2.1)<br>P =0.02   | Unadjusted                                                                                                                                                     |
|                                                                          |                                                                                                                                                       |                                                                |                                                                                                                                                                                                                                                                                                                                                                                                                                                    |                 | Breast cancer recurrence Triple-negative                | ≥ 30 vs 18.5-25 kg/ m <sup>2</sup> | 1.4 ( 1 - 2 )<br>P =0.04     | Unadjusted                                                                                                                                                     |
|                                                                          |                                                                                                                                                       |                                                                |                                                                                                                                                                                                                                                                                                                                                                                                                                                    |                 | Breast cancer recurrence Her2-overexpressing            | ≥ 30 vs 18.5-25 kg/ m <sup>2</sup> | 1.5 ( 1 - 2.1 )<br>P =0.03   | Unadjusted                                                                                                                                                     |
| Xing P, 2013 <sup>250</sup> ,<br>China<br><br>BMI – Included,<br>review  | Female,<br>Retrospective<br>Cohort of Cancer<br>Survivors<br>(n=1192) mean<br>age:51Pre-<br>menopausal<br>61.2%, post-<br>menopausal<br>38.8% Chinese | Follow Up:<br>Median 36<br>months , Loss to<br>Follow-up: 4.3% | Breast cancer<br>pathologic T stage T1<br>36.6%, T2 56.0%, T3<br>5.9%, T4 1.5%; nodal<br>stage N0 54.4%, N1<br>24.0%, N2 12.0%, N3<br>9.6%; ER status positive<br>54.7%, negative 45.3%;<br>PR status positive<br>58.4%, negative 41.6%;<br>HER2 status positive<br>21.8%, negative 78.2%<br>Curative resection;<br>breast-conserving<br>surgery 3.6%,<br>mastectomy 96.4%;<br>chemotherapy 88.4%,<br>radiotherapy 21.4%,<br>hormone therapy 43.0% | Measured        | Overall survival<br>(n=122)                             | ≥23 vs <23 kg/m <sup>2</sup>       | 1.84(1.16-2.93)<br>P=0.010   | Age, chemotherapy, er<br>status, hormone<br>therapy, menopausal<br>status, nodal status,<br>other factors, pr status,<br>radiotherapy, smoking,<br>tumor stage |
|                                                                          |                                                                                                                                                       |                                                                |                                                                                                                                                                                                                                                                                                                                                                                                                                                    |                 | Disease free<br>survival (n=120)                        |                                    | 1.96(1.29-2.97)<br>P=0.002   |                                                                                                                                                                |
|                                                                          |                                                                                                                                                       |                                                                |                                                                                                                                                                                                                                                                                                                                                                                                                                                    |                 | Hormone<br>receptor +ve<br>Overall survival             |                                    | 2.37(1.28-4.09)<br>P=0.004   |                                                                                                                                                                |
|                                                                          |                                                                                                                                                       |                                                                |                                                                                                                                                                                                                                                                                                                                                                                                                                                    |                 | Hormone<br>receptor +ve<br>Disease free<br>survival     |                                    | 4.61(1.88-11.53)<br>P=0.001  |                                                                                                                                                                |
| Zheng Z, 2013 <sup>251</sup> ,<br>China<br><br>BMI – Included,<br>review | Female,<br>Retrospective<br>Cohort of Cancer<br>Survivors (n=317)<br>mean age:53                                                                      | Diagnosed:2004-<br>2006 follow Up:<br>Median 55.4<br>months    | Breast cancer. ER/PR<br>status (n): 195 Positive,<br>122 Negative. Adjuvant<br>radiotherapy (n): 142<br>Yes, 175 No. Adjuvant                                                                                                                                                                                                                                                                                                                      | Medical records | Overall survival                                        | ≥28 vs ≤23.9 kg/m <sup>2</sup>     | 1.54(1.04-2.29)              | Adjuvant endocrine<br>therapy, ER/PR status,<br>lymph node metastasis ,<br>radiotherapy, tumor<br>size                                                         |
|                                                                          |                                                                                                                                                       |                                                                |                                                                                                                                                                                                                                                                                                                                                                                                                                                    |                 | Disease free<br>survival                                |                                    | 1.31(1.04-1.65)              |                                                                                                                                                                |

|                                                                                                                                          |                                                                                                                                       |                                                                                                                                                                   |                                                                                                                                                                                                                                                                 |                                                |                                                                  |                                 |                                  |                                                                                                                                           |
|------------------------------------------------------------------------------------------------------------------------------------------|---------------------------------------------------------------------------------------------------------------------------------------|-------------------------------------------------------------------------------------------------------------------------------------------------------------------|-----------------------------------------------------------------------------------------------------------------------------------------------------------------------------------------------------------------------------------------------------------------|------------------------------------------------|------------------------------------------------------------------|---------------------------------|----------------------------------|-------------------------------------------------------------------------------------------------------------------------------------------|
|                                                                                                                                          | (n): 165<br>Menopause<br>Chinese                                                                                                      | Diagnosed:2004-<br>2006 follow Up:<br>Maximum 7 years                                                                                                             | endocrine therapy (n):<br>168 Yes, 149 No.                                                                                                                                                                                                                      |                                                | ER/PR positive<br>Overall survival                               |                                 | 1.18(0.60-2.33)                  |                                                                                                                                           |
|                                                                                                                                          |                                                                                                                                       |                                                                                                                                                                   |                                                                                                                                                                                                                                                                 |                                                | ER/PR negative<br>Overall survival                               |                                 | 2.20(1.34-3.61)                  |                                                                                                                                           |
| Barba M, 2012 <sup>136</sup> ,<br>Regina Elena<br>National Cancer<br>Institute (RENCI),<br>Italy<br><br>BMI – Included,<br>meta-analysis | Mixed,<br>Retrospective<br>Cohort of Cancer<br>Survivors (n=202)<br>Mean age:53.4,<br>Premenopausal<br>137,<br>Postmenopausal<br>160. | Diagnosed:1998-<br>2009                                                                                                                                           | Colorectal cancer (n):<br>218. Breast cancer (n):<br>202. Stage at cancer<br>diagnosis (n): I 86, II 4,<br>III 12, IV 169. Targeted<br>agents: Trastuzumab for<br>breast cancer patients.<br>Bevacizumab and/or<br>cetuximab for colorectal<br>cancer patients. | Medical records                                | Breast cancer<br>Time to<br>progression                          | Per 1 kg/m <sup>2</sup>         | 0.92(0.80-1.06) P<br>trend=0.276 | Age at diagnosis,<br>fasting glucose                                                                                                      |
| Bayraktar S, 2012 <sup>266</sup> ,<br>UTMDACC, United<br>States,<br><br>BMI - Excluded                                                   | Retrospective<br>cohort of cancer<br>survivors (n= 1448<br>)<br>Pre- and<br>postmenopausal<br>Age range:21-87<br>years                | Treatment: 1995-<br>2007 Follow up=<br>62 months<br>535 deaths<br>559 distant<br>metastasis-free<br>survival events<br>647 recurrence-<br>free survival<br>events | Invasive TNBC<br>T1: 49.4%<br>T2: 44.5%<br>T3/4: 6.1%<br>Breast-conserving<br>surgery 51%<br>Mastectomy 49% All<br>received adjuvant<br>chemotherapy None<br>received adjuvant<br>endocrine therapy                                                             | Unclear, possibly<br>at or around<br>treatment | 5-year survival<br>(n=492)                                       | Obese vs Normal/<br>underweight | P log-rank test = 0.33           | Unadjusted                                                                                                                                |
|                                                                                                                                          |                                                                                                                                       |                                                                                                                                                                   |                                                                                                                                                                                                                                                                 | Unclear, possibly<br>at or around<br>treatment | Recurrence free<br>survival (n=601)                              | Obese vs Normal/<br>underweight | P log-rank test = 0.65           | Unadjusted                                                                                                                                |
|                                                                                                                                          |                                                                                                                                       |                                                                                                                                                                   |                                                                                                                                                                                                                                                                 | Unclear, possibly<br>at or around<br>treatment | Distant<br>metastasis-free<br>survival (n=520)                   | Obese vs<br>Normal/underweight  | P log-rank test = 0.73           | Unadjusted                                                                                                                                |
| Brooks JD, 2012 <sup>275</sup> , Women's<br>Environmental<br>Cancer and<br>Radiation<br>Epidemiology                                     | Nested case-<br>control study (n=<br>1510 )<br><br>Pre- and<br>postmenopausal                                                         | 1985-2000 Follow<br>up= 4 years                                                                                                                                   | 49.8% ER+ve, 25.9% ER-<br>ve, 24.2% other, 42%<br>PR+ve, 23.3% PR-ve,<br>34.7% other In situ or<br>invasive breast cancer;<br>65.3% localized, 34.7%                                                                                                            | Self-reported                                  | Second primary<br>breast cancer<br>(n=247)<br><br>Pre-menopausal | ≥30 vs <25 kg/m <sup>2</sup>    | 1.12 (0.56 - 2.23)               | Age at diagnosis, age of<br>menarche, number of<br>full-term pregnancies,<br>family history,<br>histology, tumour<br>stage, chemotherapy, |

|                                                                                                                                   |                                                            |                                                           |                                                                                                                                       |              |                                                            |                              |                                       |                                       |
|-----------------------------------------------------------------------------------------------------------------------------------|------------------------------------------------------------|-----------------------------------------------------------|---------------------------------------------------------------------------------------------------------------------------------------|--------------|------------------------------------------------------------|------------------------------|---------------------------------------|---------------------------------------|
| Study (WECARE), United States and Denmark,<br><br>BMI - Excluded                                                                  | Mean age: 45 years                                         |                                                           | regional<br>Chemotherapy: 44.3% yes, 55.7% no;<br>Hormone treatment: 70.7% yes, 29.2% no;<br>Radiation treatment: 70% ever, 30% never |              |                                                            |                              |                                       | hormonal therapy, radiation therapy   |
|                                                                                                                                   |                                                            |                                                           |                                                                                                                                       |              | Second primary breast cancer (n=264)<br>Post-menopausal    | ≥30 vs <25 kg/m <sup>2</sup> | 1.59 ( 0.79 - 3.17 )                  |                                       |
|                                                                                                                                   |                                                            |                                                           |                                                                                                                                       |              | Second primary breast cancer (n=108)<br>Premenopausal ER+  | ≥30 vs <25 kg/m <sup>2</sup> | 0.86 ( 0.29 - 2.58 )<br>P trend=0.85  |                                       |
|                                                                                                                                   |                                                            |                                                           |                                                                                                                                       |              | Second primary breast cancer (n=67)<br>Premenopausal ER-   | ≥30 vs <25 kg/m <sup>2</sup> | 2.68 ( 0.79 - 9.11 )<br>P trend=0.26  |                                       |
|                                                                                                                                   |                                                            |                                                           |                                                                                                                                       |              | Second primary breast cancer (n=136)<br>Postmenopausal ER+ | ≥30 vs <25 kg/m <sup>2</sup> | 0.94 ( 0.39 - 2.3 )<br>P trend=0.40   |                                       |
|                                                                                                                                   |                                                            |                                                           |                                                                                                                                       |              | Second primary breast cancer (n=72)<br>Postmenopausal ER-  | ≥30 vs <25 kg/m <sup>2</sup> | 5.64 ( 1.76 - 18.13 )<br>P trend=0.30 |                                       |
| Christiansen, 2012 <sup>56</sup> , Georgia Cancer Specialist Database (GCSD), United States,<br><br>BMI – Included, meta-analysis | Retrospective cohort study (n=209) Pre and Post-menopausal | Diagnosis year: 2003-2008<br>median follow up= 11.4 years | Invasive breast cancer non metastatic triple negative breast cancer stage I-III adjuvant chemotherapy                                 | From records | Disease-free survival                                      | Per 1 kg/m <sup>2</sup>      | 0.93 (0.864-1.001)<br>P=0.0517        | Race, age, comorbidity, stage smoking |

|                                                                                                                                          |                                                                                             |                                                                                            |                                                                                                                                    |                                                                    |                                                                 |                               |                                                                                                          |                                                                                                                                                                                     |
|------------------------------------------------------------------------------------------------------------------------------------------|---------------------------------------------------------------------------------------------|--------------------------------------------------------------------------------------------|------------------------------------------------------------------------------------------------------------------------------------|--------------------------------------------------------------------|-----------------------------------------------------------------|-------------------------------|----------------------------------------------------------------------------------------------------------|-------------------------------------------------------------------------------------------------------------------------------------------------------------------------------------|
|                                                                                                                                          |                                                                                             |                                                                                            |                                                                                                                                    |                                                                    | Breast cancer recurrence                                        | Per 1 kg/m <sup>2</sup>       | 0.93 (0.860-1.005)<br>P=0.068                                                                            |                                                                                                                                                                                     |
| Crujeiras, 2012 <sup>282</sup> , Spanish Oncology Department Review Study, Spain,<br><br>BMI - Excluded                                  | Retrospective cohort study (n=159 ) Pre- and postmenopausal mean age:59.8                   | Diagnosis year: Jan2006-Dec2006<br>Follow up= 3 years                                      | All invasive breast cancer                                                                                                         | From records                                                       | Breast cancer-specific mortality(n=18)                          | ≥30 vs <25 kg/m <sup>2</sup>  | P log-rank test = 0.77                                                                                   | Unadjusted                                                                                                                                                                          |
| Dawood , 2012 <sup>62</sup> , MD Anderson Cancer Center (MDACC), Texas Review Study, United States,<br><br>BMI – Included, meta-analysis | Retrospective cohort study (n=2311 ) Pre- and postmenopausal                                | Diagnosis year: 1990-2010 Follow up= 39 months                                             | All invasive breast cancer                                                                                                         | From records at diagnosis                                          | Overall survival(n=753)                                         | ≥30 vs <25 kg/m2              | 0.97 ( 0.81 - 1.16 )                                                                                     | Age, race, tumour stage, lymphovascular invasion, adjuvant radiation, taxane, anthracycline                                                                                         |
|                                                                                                                                          |                                                                                             |                                                                                            |                                                                                                                                    |                                                                    | Recurrence-free(n=874)                                          | ≥30 vs <25 kg/m2              | 1.02 ( 0.86 - 1.2 )                                                                                      |                                                                                                                                                                                     |
|                                                                                                                                          |                                                                                             |                                                                                            |                                                                                                                                    |                                                                    | Distant disease free(n=771)                                     | ≥30 vs <25 kg/m2              | 0.99 ( 0.83 - 1.18 )                                                                                     |                                                                                                                                                                                     |
| Del Fabbro E, 2012 <sup>392</sup> , USA<br><br>BMI - Excluded                                                                            | Female, Follow-up of Case-control Study (n=129)                                             | Diagnosed:200-2004 (treated) follow Up: Median 7.74 years                                  | Nonmetastatic, invasive ductal or lobular noninflammatory breast cancer. Stage I-III                                               | Registry database                                                  | Overall survival (n=21)<br><br>Progression-free survival (n=21) | Above normal vs normal weight | “Sarcopenia and BMI were not significantly associated with the OS time”<br><br>5-year rates<br>P =0.0389 | Age at diagnosis, fasting glucose                                                                                                                                                   |
| Ewertz , 2012 <sup>68</sup> , Breast International Group (BIG) 1-98, International,<br><br>BMI – Included, meta-analysis                 | Secondary analysis of clinical trial (n= 4760)<br><br>Postmenopausal Age range: 38-90 years | 1998-2003<br>Median 1.3 months from diagnosis to randomisation<br><br>Follow up= 8.7 years | Early stage invasive ER+ and/or PR+ breast cancer<br><br>2382 patients received letrozole,<br><br>2378 patients received tamoxifen | BMI at randomisation, before start of adjuvant endocrine treatment | Overall survival (n=829)                                        | ≥30 vs <25kg/m <sup>2</sup>   | 1.19 ( 0.99 - 1.44 )                                                                                     | Age at randomization, region, nodal status, tumour grade, tumour size, radiotherapy, mastectomy, oestrogen and progesterone receptor status, HER-2/neu, hormonal therapy, diabetes, |



|  |  |                                                         |  |  |                                                      |                             |                                            |                                                        |
|--|--|---------------------------------------------------------|--|--|------------------------------------------------------|-----------------------------|--------------------------------------------|--------------------------------------------------------|
|  |  | 829 deaths<br>1272 disease-free-survival related events |  |  |                                                      |                             |                                            | smoking, hypertension, randomisation arm, chemotherapy |
|  |  |                                                         |  |  | Overall survival<br>Letrozole                        | ≥30 vs <25kg/m <sup>2</sup> | 1.22 (0.93 - 1.60)                         |                                                        |
|  |  |                                                         |  |  | Overall survival<br>Tamoxifen                        | ≥30 vs <25kg/m <sup>2</sup> | 1.18 (0.91 - 1.52)<br>P interaction = 0.74 |                                                        |
|  |  |                                                         |  |  | Disease-free survival (n=1272)<br>Letrozole          | ≥30 vs <25kg/m <sup>2</sup> | 1.09 (0.94 - 1.27 )                        |                                                        |
|  |  |                                                         |  |  | Disease-free survival<br>Letrozole                   | ≥30 vs <25kg/m <sup>2</sup> | 1.09 (0.87 - 1.35)                         |                                                        |
|  |  |                                                         |  |  | Disease-free survival<br>Tamoxifen                   | ≥30 vs <25kg/m <sup>2</sup> | 1.10 (0.89 - 1.35)<br>P interaction = 0.89 |                                                        |
|  |  |                                                         |  |  | Breast cancer-free survival(n=815)<br>Letrozole      | ≥30 vs <25kg/m <sup>2</sup> | 1.01 (0.84 - 1.23)                         |                                                        |
|  |  |                                                         |  |  | Breast cancer-free survival<br>Letrozole             | ≥30 vs <25kg/m <sup>2</sup> | 1.03 (0.78 - 1.36)                         |                                                        |
|  |  |                                                         |  |  | Breast cancer-free survival<br>Tamoxifen             | ≥30 vs <25kg/m <sup>2</sup> | 0.99 (0.75 - 1.29)<br>P interaction = 0.60 |                                                        |
|  |  |                                                         |  |  | Distant recurrence-free survival(n=625)<br>Letrozole | ≥30 vs <25kg/m <sup>2</sup> | 1.16 ( 0.94 - 1.44 )                       |                                                        |
|  |  |                                                         |  |  | Distant recurrence-free survival<br>Letrozole        | ≥30 vs <25kg/m <sup>2</sup> | 1.21 (0.88 - 1.66)                         |                                                        |

|                                                                                                                 |                                                                                                                                                                                                                      |                                                                                                                                                                                                                             |                                                                                                                                                                                                                                                                                                                     |                                                |                                               |                                          |                                            |                                                                                                   |
|-----------------------------------------------------------------------------------------------------------------|----------------------------------------------------------------------------------------------------------------------------------------------------------------------------------------------------------------------|-----------------------------------------------------------------------------------------------------------------------------------------------------------------------------------------------------------------------------|---------------------------------------------------------------------------------------------------------------------------------------------------------------------------------------------------------------------------------------------------------------------------------------------------------------------|------------------------------------------------|-----------------------------------------------|------------------------------------------|--------------------------------------------|---------------------------------------------------------------------------------------------------|
|                                                                                                                 |                                                                                                                                                                                                                      |                                                                                                                                                                                                                             |                                                                                                                                                                                                                                                                                                                     |                                                | Distant recurrence-free survival<br>Tamoxifen | ≥30 vs <25kg/m <sup>2</sup>              | 1.11 (0.82 - 1.50)<br>P interaction = 0.92 |                                                                                                   |
| Goodwin PJ, 2012 <sup>72</sup> , Toronto, Canada,<br><br>BMI – Included, meta-analysis                          | Prospective cohort study of cancer survivors (n= 535)<br><br>Pre- and postmenopausal<br>Mean age: 50.3 years<br><br>Multi-ethnic<br><br>Excluded women with serious coexisting medical conditions including diabetes | 1989-1996<br><br>Follow up= 12.1 years<br><br>134 deaths<br><br>113 breast cancer deaths<br><br>21 deaths from other causes<br><br>40 locoregional recurrences<br><br>136 distant recurrences<br><br>4.3% loss to follow-up | Invasive breast cancer<br>T1 55.5%, T2 32.5%, T3 5%, Tx 6.9%<br><br>NO 69.2%, N1 30.8%<br><br>M0<br><br>ER+ 67.7%<br><br>ER- 18.7%<br><br>Unknown 13.6%<br><br>PR+ 61.7%<br><br>PR- 23.4%<br><br>Unknown 15%<br><br>Mastectomy: 22.8%<br><br>Lumpectomy: 77.2%<br>Chemotherapy: 39.8%<br><br>Hormone therapy: 39.1% | Measured height and weight before chemotherapy | Overall survival (n=134)                      | 27.8-54.8 vs 21.9-24.4 kg/m <sup>2</sup> | 1.19 (0.89 – 1.61)                         | Age, Tumour stage, Tumour grade, Hormone receptor status, Adjuvant chemotherapy, Hormonal therapy |
|                                                                                                                 |                                                                                                                                                                                                                      |                                                                                                                                                                                                                             |                                                                                                                                                                                                                                                                                                                     |                                                | Distant disease free(n=134)                   | 27.8-54.8 vs 21.9-24.4 kg/m <sup>2</sup> | 1.15 (0.85 – 1.57)                         |                                                                                                   |
| Haakinson, 2012 <sup>166</sup> , Mayo Clinic Arizona Review Study, United States,<br><br>BMI – Included, review | Retrospective cohort study (n= 1352 ) Pre- and postmenopausal mean age:66                                                                                                                                            | Diagnosis year: 2000-2008 Follow up= 2.5 years                                                                                                                                                                              | All invasive breast cancer                                                                                                                                                                                                                                                                                          | From records                                   | Overall survival                              | ≥30 vs <30 kg/m <sup>2</sup>             | 1.530 ( 0.965 - 2.431 )                    | Node status, tumour size, tumour stage                                                            |
| He, 2012 <sup>168</sup> , MD Anderson Cancer Center (MDACC), Texas Review                                       | Retrospective cohort study (n= 1983 )                                                                                                                                                                                | Treatment: 1998-2010 Follow up= 47.6 months                                                                                                                                                                                 | Invasive breast cancer Stage II-IV<br>HER2+<br>Diabetics                                                                                                                                                                                                                                                            | From records at first clinic visit             | Overall survival                              | ≥35 vs 20-24.9 kg/m <sup>2</sup>         | 0.73 ( 0.55 - 0.97 )                       | Age, Race, Diabetes, Tumor grade, Hormone receptor status, Tumor stage, Treatment                 |

|                                                                                                                                                                                                                 |                                                                                                                                                           |                                                                                                      |                                                                                                                                                                                                                          |                                                         |                                           |                                      |                                   |                                                                                                                                                                                                                                                                   |
|-----------------------------------------------------------------------------------------------------------------------------------------------------------------------------------------------------------------|-----------------------------------------------------------------------------------------------------------------------------------------------------------|------------------------------------------------------------------------------------------------------|--------------------------------------------------------------------------------------------------------------------------------------------------------------------------------------------------------------------------|---------------------------------------------------------|-------------------------------------------|--------------------------------------|-----------------------------------|-------------------------------------------------------------------------------------------------------------------------------------------------------------------------------------------------------------------------------------------------------------------|
| Study, United States,<br>BMI – Included, review                                                                                                                                                                 | Pre- and postmenopausal<br>Age range:21-89 years<br>Loss to follow up: 2%                                                                                 |                                                                                                      | with antidiabetic medications 154 women<br>Non-diabetics 1,829 women                                                                                                                                                     |                                                         |                                           |                                      |                                   |                                                                                                                                                                                                                                                                   |
|                                                                                                                                                                                                                 |                                                                                                                                                           |                                                                                                      |                                                                                                                                                                                                                          |                                                         | Overall survival Diabetic                 | ≥30 vs 20-30 kg/m <sup>2</sup>       | 0.59 ( 0.32 - 1.09 )              | Age, Hormone receptor status, Tumor stage, Treatment                                                                                                                                                                                                              |
|                                                                                                                                                                                                                 |                                                                                                                                                           |                                                                                                      |                                                                                                                                                                                                                          |                                                         | Breast cancer-specific mortality Diabetic | ≥30 vs 20-30 kg/m <sup>2</sup>       | 0.64 ( 0.33 - 1.23 )              |                                                                                                                                                                                                                                                                   |
| Jung, 2012 <sup>81</sup> ,<br>University of Pittsburgh Medical Center (UPMC) and the University of Pittsburgh Cancer Institute (UPCI) Breast Cancer Project, United States<br><br>BMI – Included, meta-analysis | Retrospective cohort study, hospital clinic-based (n= 557) mean age: 55 years<br><br>post-menopausal,                                                     | Diagnosis year: 1999-2008<br><br>Follow up= 9 years                                                  | Invasive breast cancer 73.2% ER/PR+, 26.8% ER/PR- Metastatic breast cancer; 34.5% HER2+, 65.5% HER2-, and metastatic at only one site (69.8%)                                                                            | From records at study entry                             | Overall survival(n=403)                   | ≥30 vs 20-24.9 kg/m <sup>2</sup>     | 0.85 (0.63 - 1.16)                | Age, menopausal status, hypertension, comorbidity, Heart failure, chronic pulmonary disease, mild liver disease, diabetes, receptor status, metastasis-free survival, metastasis location, race, education                                                        |
| Kawai, 2012 <sup>82</sup> ,<br>Miyagi, Japan,<br><br>BMI – Included, meta-analysis                                                                                                                              | Prospective cohort study of cancer survivors (n= 653)<br><br>Pre- (42.4%) and postmenopausal (54.2%)<br><br>Mean age: 57 years<br><br>Response rate 92.5% | 1997-2005 Follow up= 5.85 years<br><br>136 deaths<br><br>108 breast cancer deaths Complete follow-up | In situ or localised 39.2%<br><br>Lymph node metastasis 35.7%<br><br>Local invasion 8.7%<br><br>Distant metastasis 3.1%<br><br>Unknown 13.3%<br><br>ER+ or PR+ 62.8%<br><br>ER-/PR- 26.6%<br><br>Unknown HR status 10.6% | Validated self-reported pre-treatment height and weight | All-cause mortality(n=136)                | ≥25.8 vs 21.2-23.2 kg/m <sup>2</sup> | 1.46 (0.87- 2.44)<br>P trend=0.59 | Age, tumour stage, hormone receptor status, radiation therapy, chemotherapy, hormonal therapy, smoking, physical activity, menopausal status, family history of breast cancer, comorbidities (hypertension, ischemic heart disease, stroke and diabetes mellitus) |

|                                                                                                                                                                     |                                                                                        |                                                                                                                 |                                                                                                                                                                                                                                                                                                                       |                           |                                         |                                      |                                             |                                                  |
|---------------------------------------------------------------------------------------------------------------------------------------------------------------------|----------------------------------------------------------------------------------------|-----------------------------------------------------------------------------------------------------------------|-----------------------------------------------------------------------------------------------------------------------------------------------------------------------------------------------------------------------------------------------------------------------------------------------------------------------|---------------------------|-----------------------------------------|--------------------------------------|---------------------------------------------|--------------------------------------------------|
|                                                                                                                                                                     |                                                                                        |                                                                                                                 | Radiation therapy<br>18.7%                                                                                                                                                                                                                                                                                            |                           |                                         |                                      |                                             |                                                  |
|                                                                                                                                                                     |                                                                                        |                                                                                                                 | Chemotherapy 23.7%                                                                                                                                                                                                                                                                                                    |                           |                                         |                                      |                                             |                                                  |
|                                                                                                                                                                     |                                                                                        |                                                                                                                 | Endocrine therapy<br>24.5%                                                                                                                                                                                                                                                                                            |                           |                                         |                                      |                                             |                                                  |
|                                                                                                                                                                     |                                                                                        |                                                                                                                 | Comorbidities 23.6%                                                                                                                                                                                                                                                                                                   |                           |                                         |                                      |                                             |                                                  |
|                                                                                                                                                                     |                                                                                        |                                                                                                                 |                                                                                                                                                                                                                                                                                                                       |                           | Breast cancer-specific mortality(n=108) | ≥25.8 vs 21.2-23.2 kg/m <sup>2</sup> | 1.46 ( 0.81 - 2.64 )<br>P trend=0.87        |                                                  |
| Lee, 2012 <sup>86</sup> ,<br>Seoul National University Hospital, Korea,<br><br>BMI – Included, meta-analysis (breast cancer mortality)<br><br>Excluded (recurrence) | Retrospective cohort study (n= 438) mean age:45.3 years<br><br>Pre and Post-menopausal | Diagnosis year: 1994-2008 Follow up= 35.4 months, 112 (25.6%) recurrent patients, and 49 (11.2%) patients died. | Invasive breast cancer<br>Clinical stage IIA 4.3%<br>IIB 17.8%, IIIA 47.5%, IIIB 15.3%, IIIC 13.9%, Unknown 1.1%<br><br>47.9% ER+ 52.1% ER-<br>32.9% PR+ 67.1%PR-<br><br>Neoadjuvant regimen<br>DA 95%<br><br>AC 7.5%<br><br>PGH 3.4%<br><br>Others 4.6%<br><br>Radiation therapy 85.8%<br><br>Hormonal therapy 45.2% | Measured                  | Breast cancer mortality                 | ≥30 vs <25 kg/m <sup>2</sup>         | 0.810 (0.107 - 6.137 )<br><br>P trend=0.172 | Age, stage, hormonal receptor status             |
|                                                                                                                                                                     |                                                                                        |                                                                                                                 |                                                                                                                                                                                                                                                                                                                       |                           | Breast cancer mortality                 | Per 1 kg/m <sup>2</sup>              | 1.002 (0.918 - 1.095)                       | Age                                              |
|                                                                                                                                                                     |                                                                                        |                                                                                                                 |                                                                                                                                                                                                                                                                                                                       |                           | Relapse-free survival                   | Per 1 kg/m <sup>2</sup>              | 0.995 (0.938 - 1.05)                        | Unadjusted                                       |
| Lee, 2012 <sup>307</sup> ,<br>Korea,<br><br>BMI - Excluded                                                                                                          | Retrospective cohort study (n= 980 )                                                   | 2004-2007 Follow up= 5.3 years<br>141 disease-free survival events                                              | Invasive ductal carcinoma<br>TNM I 40.1%<br>TNM II 42.5%                                                                                                                                                                                                                                                              | BMI interview at baseline | Disease-free survival (n=141)           | >25 vs <25 kg/m <sup>2</sup>         | 0.79 ( 0.52 - 1.20 )                        | Age, TNM stage, hormonal receptor status, grade, |

|                                                                                                                        |                                                                                                     |                                                                                           |                                                                                                                                                                                                                                                                     |                                 |                                        |                                    |                                   |                                                                                                                          |
|------------------------------------------------------------------------------------------------------------------------|-----------------------------------------------------------------------------------------------------|-------------------------------------------------------------------------------------------|---------------------------------------------------------------------------------------------------------------------------------------------------------------------------------------------------------------------------------------------------------------------|---------------------------------|----------------------------------------|------------------------------------|-----------------------------------|--------------------------------------------------------------------------------------------------------------------------|
|                                                                                                                        | Pre- and postmenopausal                                                                             | including 77 deaths                                                                       | TNM III 16.7%<br>ER- 39.2%<br>pPR- 44.2%                                                                                                                                                                                                                            |                                 |                                        |                                    |                                   | education, Recruitment site                                                                                              |
| Markkula, 2012 <sup>311</sup> , Sweden,<br><br>BMI – Excluded                                                          | Prospective cohort study (n= 772 )<br>Pre and post-menopausal<br>Mean age:61.2 years                | 2002-2010<br>Follow up= 7 years<br>62 breast cancer events                                | In situ 28 cases Invasive 739 cases<br>ER+ 86.8%<br>PR+ 69.3%<br>Grade I 191 cases<br>II 382 cases<br>III 191 cases                                                                                                                                                 | BMI measured prior to operation | Distant metastasis-free survival(n=40) | ≥25 vs <24.9 kg/m <sup>2</sup>     | P log-rank test = 0.075           | Unadjusted                                                                                                               |
| Mousa, 2012 <sup>317</sup> , Turkey,<br><br>BMI - Excluded                                                             | Retrospective cohort study (n= 433 )<br>Pre- and postmenopausal<br>Mean age:48.56 years             | 1988-2006 Follow up= 18 years<br>41 deaths<br>94 relapse                                  | Early stage breast cancer<br>Grade I 22.2%, 2 39.7%, 3 17.3%, unknown 20.8%<br>Breast conserving surgery 11.8%<br>Modified radical mastectomy 88.2%<br>Chemotherapy 90.1 %<br>Radiotherapy: 40%<br>Tamoxifen 56.4%<br>Aromatase inhibitors 7.4%<br>Trastuzumab 2.7% | BMI at diagnosis                | Overall survival(n=41)                 | >30 vs 18.5-24.9 kg/m <sup>2</sup> | P = 0.51                          | Unadjusted                                                                                                               |
|                                                                                                                        |                                                                                                     |                                                                                           |                                                                                                                                                                                                                                                                     |                                 | Disease-free survival                  | >30 vs 18.5-24.9 kg/m <sup>2</sup> | P = 0.13                          | Unadjusted                                                                                                               |
| Panagopoulou P, 2012 <sup>103</sup> , Hellenic Cooperative Oncology Group (HeCOG) (10/97; 10/00; 10/04; 10/05), Greece | Secondary analysis of clinical trial (n= 2789)<br>mean age:52 years<br>Pre-, peri-, post-menoapusal | 1997-2008<br>Follow up= 5.08 years<br>507 women (18.2 %) died on account of breast cancer | Node+ or high-risk node- invasive breast cancer<br><br>Treatment:<br>HE 10/97 and 10/00 E-T-CMF vs E-CMF<br>HE 10/04: E-CMF vs docetaxel                                                                                                                            | Self-reported at diagnosis      | Breast cancer mortality(n=507)         | ≥30 vs <25 kg/m <sup>2</sup>       | 1.27 (1.00-1.62)<br>P trend=0.003 | Age, menopausal status, tumour size/grade, number of positive nodes, HR and HER2 status, surgery type/treatment protocol |

|                                                                                                             |                                                                                                                            |                                                                                                                                                                   |                                                                                                                                                                                                                                                                                                                                                                                                                                             |                                                         |                                                         |                                                                  |                                              |                                                                                                                                                                                                                     |
|-------------------------------------------------------------------------------------------------------------|----------------------------------------------------------------------------------------------------------------------------|-------------------------------------------------------------------------------------------------------------------------------------------------------------------|---------------------------------------------------------------------------------------------------------------------------------------------------------------------------------------------------------------------------------------------------------------------------------------------------------------------------------------------------------------------------------------------------------------------------------------------|---------------------------------------------------------|---------------------------------------------------------|------------------------------------------------------------------|----------------------------------------------|---------------------------------------------------------------------------------------------------------------------------------------------------------------------------------------------------------------------|
| BMI – Included, meta-analysis                                                                               |                                                                                                                            | 34 patients loss to follow-up                                                                                                                                     | HE 10/05: E-T-CMF vs E-CMF                                                                                                                                                                                                                                                                                                                                                                                                                  |                                                         |                                                         |                                                                  |                                              |                                                                                                                                                                                                                     |
| Sendur, 2012 <sup>331</sup> , Turkey,<br>BMI - Excluded                                                     | Retrospective cohort study (n= 501 )<br>Postmenopausal                                                                     | 2000-2012 Follow up= 25.1 months                                                                                                                                  | HR+ breast cancer                                                                                                                                                                                                                                                                                                                                                                                                                           | From records                                            | 3-year survival                                         | ≥25 vs <25 kg/m <sup>2</sup>                                     | P log-rank test = 0.08                       | Unadjusted                                                                                                                                                                                                          |
|                                                                                                             |                                                                                                                            |                                                                                                                                                                   |                                                                                                                                                                                                                                                                                                                                                                                                                                             |                                                         | Disease-free survival                                   | ≥25 vs <25 kg/m <sup>2</sup>                                     | P log-rank test = 0.57                       | Unadjusted                                                                                                                                                                                                          |
| Sparano JA, 2012 <sup>339</sup> , Phase III Taxane-based Drug Trial E1199, United States,<br>BMI - Excluded | Secondary analysis of clinical trial (n= 4817 ) pre- and postmenopausal age range: 22-84 years recruited between 1999-2002 | Follow up= 95 months 904 deaths, 577 breast cancer mortality, 127 deaths after breast cancer recurrence, 119 deaths from other causes, 81 unknown causes of death | Axillary lymph node metastases breast cancer<br>71.4% ER/PR+, 27.1% ER/PR-, 1.5% unknown<br>Triple-negative disease: 31.9% of black patients, 17.2% of non-blacks patients<br>Stage I-III Surgery (among those with data): 99% breast-sparing surgery, 1% mastectomy; Radiation therapy: 56.1% given, 43.9% not-given; Endocrine therapy given (among those with data): 32.8% tamoxifen alone, 56.3% tamoxifen and then aromatase inhibitor | No info, possibly after diagnosis but before drug trial | Overall survival(n=904)<br>Disease-free survival(n=127) | ≥ 30 vs < 30 kg/m <sup>2</sup><br>≥ 30 vs < 30 kg/m <sup>2</sup> | 1.35 ( 1.11 - 1.64 )<br>1.22 ( 1.04 - 1.44 ) |                                                                                                                                                                                                                     |
| Sparano, 2012 <sup>203</sup> , ECOG E1199, E5188, E3189, United States,<br>BMI – Included, review           | Secondary analysis of clinical trial (n= 4770 ) Pre- and postmenopausal age range:22-84 years<br><br>Trial E5188           | Treatment 1999-2002 Follow up= 7.9 years                                                                                                                          | Invasive breast cancer                                                                                                                                                                                                                                                                                                                                                                                                                      | Prior to adjuvant therapy                               | Overall survival premenopausal ER+                      | ≥ 30 vs < 30 kg/m <sup>2</sup>                                   | 1.51 ( 1.24 - 1.83 )                         | Age, race, premenopausal status (E1199 and E3189), tumour size, axillary nodal status, surgery, use of radiation therapy (E5188 and E3189), systemic therapy (E5188 and E3189), chemotherapy treatment arm (E3189), |

|  |             |  |  |  |                                                           |                                |                      | treatment duration of endocrine therapy (E5188) |
|--|-------------|--|--|--|-----------------------------------------------------------|--------------------------------|----------------------|-------------------------------------------------|
|  | Trial E3189 |  |  |  | Overall survival ER-                                      | ≥ 30 vs < 30 kg/m <sup>2</sup> | 0.83 ( 0.63 - 1.09 ) |                                                 |
|  | Trial E1199 |  |  |  | Overall survival ER+&/PR+/HER2-ve/unknown                 | ≥ 30 vs < 30 kg/m <sup>2</sup> | 1.37 ( 1.13 - 1.67 ) |                                                 |
|  | Trial E1199 |  |  |  | Overall survival Triple-negative disease                  | ≥ 30 vs < 30 kg/m <sup>2</sup> | 1.11 ( 0.85 - 1.46 ) |                                                 |
|  | Trial E1199 |  |  |  | Overall survival HER2 positive                            | ≥ 30 vs < 30 kg/m <sup>2</sup> | 0.99 ( 0.73 - 1.34 ) |                                                 |
|  |             |  |  |  | Breast cancer-specific mortality(n=704)                   | ≥ 30 vs < 30 kg/m <sup>2</sup> | 1.39 ( 1.11 - 1.75 ) |                                                 |
|  | Trial E5188 |  |  |  | Breast cancer-specific mortality premenopausal ER+        | ≥ 30 vs < 30 kg/m <sup>2</sup> | 1.54 ( 1.26 - 1.88 ) |                                                 |
|  | Trial 3189  |  |  |  | Breast cancer-specific mortality ER negative              | ≥ 30 vs < 30 kg/m <sup>2</sup> | 0.85 ( 0.63 - 1.15 ) |                                                 |
|  | Trial E1199 |  |  |  | Breast cancer-specific mortality ER+&/PR+/HER2-ve/unknown | ≥ 30 vs < 30 kg/m <sup>2</sup> | 1.40 ( 1.11 - 1.76 ) |                                                 |
|  | Trial E1199 |  |  |  | Breast cancer-specific mortality Triple-negative disease  | ≥ 30 vs < 30 kg/m <sup>2</sup> | 1.00 ( 0.74 - 1.36 ) |                                                 |
|  | Trial E1199 |  |  |  | Breast cancer-specific mortality HER2 positive            | ≥ 30 vs < 30 kg/m <sup>2</sup> | 1.00 ( 0.71 - 1.40 ) |                                                 |
|  | Trial E5188 |  |  |  | Disease-free premenopausal ER+                            | ≥ 30 vs < 30 kg/m <sup>2</sup> | 1.41 ( 1.19 - 1.67 ) |                                                 |
|  | Trial E3189 |  |  |  | Disease-free survival ER-                                 | ≥ 30 vs < 30 kg/m <sup>2</sup> | 0.90 ( 0.70 - 1.16 ) |                                                 |

|                                                                                                                                      |                                                            |           |                                                                                                                                                                                                                                                                                                                           |                |                                                      |                                |                      |                        |
|--------------------------------------------------------------------------------------------------------------------------------------|------------------------------------------------------------|-----------|---------------------------------------------------------------------------------------------------------------------------------------------------------------------------------------------------------------------------------------------------------------------------------------------------------------------------|----------------|------------------------------------------------------|--------------------------------|----------------------|------------------------|
|                                                                                                                                      | Trial E1199                                                |           |                                                                                                                                                                                                                                                                                                                           |                | Disease-free survival ER+&/PR+/HER2-ve/unknown       | ≥ 30 vs < 30 kg/m <sup>2</sup> | 1.24 ( 1.06 - 1.46 ) |                        |
|                                                                                                                                      | Trial E1199                                                |           |                                                                                                                                                                                                                                                                                                                           |                | Disease-free survival Triple-negative disease        | ≥ 30 vs < 30 kg/m <sup>2</sup> | 1.02 ( 0.80 - 1.30)  |                        |
|                                                                                                                                      | Trial E1199                                                |           |                                                                                                                                                                                                                                                                                                                           |                | Disease-free survival HER2 positive                  | ≥ 30 vs < 30 kg/m <sup>2</sup> | 1.06 ( 0.82 - 1.38 ) |                        |
| Wolters, 2012 <sup>208</sup> , (Breast Cancer Care under Evidence-Based Guidelines (BRENDA) project, Germany, BMI – Included, review | Retrospective cohort study (n= 4636 ) Mean age:61.48 years | 1992-2005 | Invasive primary breast cancer Grading: 1: 6.4%, 2: 61.0%, 3: 32.4%, unknown: 0.4% HR- 15.7%, HR+ 84.0%, unknown 0.2% HER2/neu- 55.2%, HER2/neu+ 33.2%, unknown 11.6% No adjuvant drug therapy: 12.0% Chemotherapy:16.6%; Chemo- + hormone therapy: 26.7%; Hormone therapy: 44.7% AI: 14.5% Tamoxifen: 53.9% Others: 3.0% | No description | recurrence free survival premenopausal HR+ patients  | ≥30 vs <30 kg/m <sup>2</sup>   | 1.44 ( 0.82 - 2.53 ) | Multivariable adjusted |
|                                                                                                                                      |                                                            |           |                                                                                                                                                                                                                                                                                                                           |                | recurrence free survival postmenopausal HR+ patients | ≥30 vs <30 kg/m <sup>2</sup>   | 1.61 ( 1.24 - 2.09 ) |                        |
|                                                                                                                                      |                                                            |           |                                                                                                                                                                                                                                                                                                                           |                | recurrence free survival HR+ breast cancer patients  | ≥30 vs <30 kg/m <sup>2</sup>   | 1.3 ( 1.03 - 1.65 )  |                        |
|                                                                                                                                      |                                                            |           |                                                                                                                                                                                                                                                                                                                           |                | recurrence free survival HR+ breast cancer patients  | ≥30 vs <25 kg/m <sup>2</sup>   | 1.50 ( 1.17 - 1.93 ) |                        |



|                                                                                                                                                 |                                                            |                                                                   |                                                                                                                                                                                                                                                                                                                        |                                                |                                  |                                    |                      |                                                                                                                          |
|-------------------------------------------------------------------------------------------------------------------------------------------------|------------------------------------------------------------|-------------------------------------------------------------------|------------------------------------------------------------------------------------------------------------------------------------------------------------------------------------------------------------------------------------------------------------------------------------------------------------------------|------------------------------------------------|----------------------------------|------------------------------------|----------------------|--------------------------------------------------------------------------------------------------------------------------|
|                                                                                                                                                 |                                                            |                                                                   |                                                                                                                                                                                                                                                                                                                        |                                                | recurrence free survival HR-     | ≥30 vs <30 kg/m <sup>2</sup>       | 1.2 ( 0.8 - 1.81 )   |                                                                                                                          |
| Ademuyiwa, 2011 <sup>41</sup> , Roswell Park Cancer Institute (RPCI), Buffalo Review Study, United States,<br><br>BMI – Included, meta-analysis | Retrospective cohort study (n= 418) mean age: 54 years     | Diagnosis year: 1996-2010<br><br>Follow up= 37.2 months 87 deaths | Invasive TNBC<br>AJCC stages: 36.8% I, 47.6% II, 15.6% III;<br>Breast conserving surgery: 72%<br>Chemotherapy: 80.6%                                                                                                                                                                                                   | From records at diagnosis                      | Overall survival(n=87)           | obese vs normal/underweight        | 0.94 (0.54 - 1.64)   | Age at diagnosis, race, chemotherapy, year of diagnosis, grade, histology , stage, lymphovascular invasion               |
| Allin, 2011 <sup>261</sup> , Denmark,<br><br>BMI - Excluded                                                                                     | Prospective cohort study (n= 2910 ) age range: 26-99       | Diagnosis year: 2002-2009 Follow up=                              |                                                                                                                                                                                                                                                                                                                        | self-administered questionnaire, Self-reported | overall survival(n=383)          | ≥30 vs 18.5-24.9 kg/m <sup>2</sup> | 1.45 ( 1.01 - 2.09 ) | Unadjusted                                                                                                               |
|                                                                                                                                                 |                                                            |                                                                   |                                                                                                                                                                                                                                                                                                                        |                                                | Breast cancer mortality (n=225)  | ≥30 vs 18.5-24.9 kg/m <sup>2</sup> | 1.62 ( 1.05 - 2.52 ) | Unadjusted                                                                                                               |
|                                                                                                                                                 |                                                            |                                                                   |                                                                                                                                                                                                                                                                                                                        |                                                | Disease-free survival            | ≥30 vs 18.5-24.9 kg/m <sup>2</sup> | 1.58 ( 1.13 - 2.21 ) | Unadjusted                                                                                                               |
|                                                                                                                                                 |                                                            |                                                                   |                                                                                                                                                                                                                                                                                                                        |                                                | Breast cancer recurrence (n=118) | ≥30 vs 18.5-24.9 kg/m <sup>2</sup> | 1.88 ( 1.08 - 3.25 ) | Unadjusted                                                                                                               |
| Baumgartner, 2011 <sup>43</sup> , Munchen University Breast Cancer Center Review Study, Germany,<br><br>BMI – Included, meta-analysis           | Retrospective cohort study (n= 1053) Age range:27-94 years | Diagnosis year: 1984-2006 Follow up= 88 months                    | Invasive primary invasive, nonmetastatic breast cancer<br><br>Tumour stages: 55.1% T1, 33.1% T2, 5.4% T3, 6.5% T4 among peri-postmenopausal women with data<br><br>Mastectomy: 37.1%;<br>Breast conserving surgery: 62.9%<br>Chemotherapy: 48.2%<br><br>Radiotherapy: 74.5%<br><br>Hormonal therapy: 87.6% among peri- | From records                                   | Overall survival perimenopausal  | Per 1 kg/m <sup>2</sup>            | 1.31 (1.11 - 1.54)   | Age, tumour stage and grade, nodal status, hormonal therapy, histology, surgery, adjuvant therapy, adjuvant chemotherapy |

|                                                                                                                 |                                                                                                                                                                                       |                                                                                                        | postmenopausal women with data                                                                                                                                                                                                                                                                                                 |                                              |                                                          |                                |                          |                                                                                                                                        |
|-----------------------------------------------------------------------------------------------------------------|---------------------------------------------------------------------------------------------------------------------------------------------------------------------------------------|--------------------------------------------------------------------------------------------------------|--------------------------------------------------------------------------------------------------------------------------------------------------------------------------------------------------------------------------------------------------------------------------------------------------------------------------------|----------------------------------------------|----------------------------------------------------------|--------------------------------|--------------------------|----------------------------------------------------------------------------------------------------------------------------------------|
|                                                                                                                 |                                                                                                                                                                                       |                                                                                                        |                                                                                                                                                                                                                                                                                                                                |                                              | Overall survival post-menopausal                         | Per 1 kg/m <sup>2</sup>        | 0.98 (0.96 - 1.01)       |                                                                                                                                        |
| Bergmann, 2011 <sup>267</sup> , Brazil,<br>BMI - Excluded                                                       | Retrospective cohort study (n= 196 ) Pre- and postmenopausal mean age:55.9                                                                                                            | Treatment 2006-2007 Follow up= 18.69 months                                                            | All invasive breast cancer                                                                                                                                                                                                                                                                                                     | Prior to neoadjuvant or palliative treatment | Overall survival(n=62)                                   | Obese vs non-obese             | P log-rank test = 0.0294 | Unadjusted                                                                                                                             |
| Ewertz, 2011 <sup>159</sup> , Danish Breast Cancer Cooperative Group (DBCG), Denmark,<br>BMI – Included, review | Secondary analysis of clinical trial (n= 18,967) Pre- and postmenopausal Age range:39-70 years Complete follow-up for first events (loco regional recurrences and distant metastases) | Treatment 1977-2008 Follow up= 7.1 years 15,197 breast cancer deaths, 5,967 deaths from unknown causes | Early stage breast cancer<br>ER+ 32276 cases<br>ER- 9780 cases,<br>Unknown 11760 cases<br>Ductal grade 1 14077 cases, grade 2 19456 cases, grade 3 9282 cases<br>Lobular breast cancer 5532 cases<br>No adjuvant treatment 22968 cases<br>Chemotherapy 10230 cases, Endocrine therapy 16148 cases, Combined therapy 4470 cases | From records, prior to adjuvant therapy      | Overall survival 0-10 years of follow up                 | ≥ 30 vs < 25 kg/m <sup>2</sup> | 1.09 (1.00-1.18)         | Age, menopausal status, tumor size, nodal status, tumor grade, histology , ER status, fascia invasion, protocol year, systemic therapy |
|                                                                                                                 |                                                                                                                                                                                       |                                                                                                        |                                                                                                                                                                                                                                                                                                                                |                                              | Overall survival 10+ years of follow-up                  | ≥ 30 vs < 25 kg/m <sup>2</sup> | 1.33 ( 1.14 - 1.56 )     |                                                                                                                                        |
|                                                                                                                 |                                                                                                                                                                                       |                                                                                                        |                                                                                                                                                                                                                                                                                                                                |                                              | Breast cancer-specific mortality 0-10 years of follow up | ≥ 30 vs < 25 kg/m <sup>2</sup> | 1.11 ( 1.02 - 1.21 )     |                                                                                                                                        |
|                                                                                                                 |                                                                                                                                                                                       |                                                                                                        |                                                                                                                                                                                                                                                                                                                                |                                              | Breast cancer-specific mortality 10+ years of follow-up  | ≥ 30 vs < 25 kg/m <sup>2</sup> | 1.38 ( 1.11 - 1.71 )     |                                                                                                                                        |
|                                                                                                                 |                                                                                                                                                                                       |                                                                                                        |                                                                                                                                                                                                                                                                                                                                |                                              | Non-breast-cancer-related death 0-10 years of follow up  | ≥ 30 vs < 25 kg/m <sup>2</sup> | 0.97 ( 0.79 - 1.21 )     |                                                                                                                                        |

|                                                                                                          |                                                                                |                                           |                                                                                 |                                |                                                                          |                                |                      |            |
|----------------------------------------------------------------------------------------------------------|--------------------------------------------------------------------------------|-------------------------------------------|---------------------------------------------------------------------------------|--------------------------------|--------------------------------------------------------------------------|--------------------------------|----------------------|------------|
|                                                                                                          |                                                                                |                                           |                                                                                 |                                | Non-breast-cancer-related death<br>10+ years of follow-up                | ≥ 30 vs < 25 kg/m <sup>2</sup> | 1.31 ( 1.05 - 1.63 ) |            |
|                                                                                                          |                                                                                |                                           |                                                                                 |                                | Locoregional recurrence<br>0-5 years of follow up                        | ≥ 30 vs < 25 kg/m <sup>2</sup> | 1.05 ( 0.88 - 1.25 ) |            |
|                                                                                                          |                                                                                |                                           |                                                                                 |                                | Locoregional recurrence<br>5-10 years of follow-up                       | ≥ 30 vs < 25 kg/m <sup>2</sup> | 0.74 ( 0.46 - 1.18 ) |            |
|                                                                                                          |                                                                                |                                           |                                                                                 |                                | Distant metastases<br>0-5 years of follow up                             | ≥ 30 vs < 25 kg/m <sup>2</sup> | 1.08 (0.96 - 1.21)   |            |
|                                                                                                          |                                                                                |                                           |                                                                                 |                                | Distant metastases<br>5-10 years of follow-up                            | ≥ 30 vs < 25 kg/m <sup>2</sup> | 1.46 ( 1.11 - 1.92 ) |            |
|                                                                                                          |                                                                                | 10+ years since diagnosis                 |                                                                                 |                                | All-cause mortality<br>10+ years since diagnosis,<br>No adjuvant therapy | ≥ 30 vs < 25 kg/m <sup>2</sup> | 1.08 (0.84-1.39)     |            |
|                                                                                                          |                                                                                |                                           |                                                                                 |                                | All-cause mortality<br>10+ years since diagnosis,<br>Chemotherapy        | ≥ 30 vs < 25 kg/m <sup>2</sup> | 1.77 (1.37 – 2.29)   |            |
|                                                                                                          |                                                                                |                                           |                                                                                 |                                | All-cause mortality<br>10+ years since diagnosis,<br>Hormonal therapy    | ≥ 30 vs < 25 kg/m <sup>2</sup> | 1.57 (1.09 – 2.26)   |            |
| Jung, 2011 <sup>80</sup> ,<br>University of Pittsburgh<br>Medical Center (UPMC) and the<br>University of | Retrospective<br>cohort study (n=553) mean age:<br>55 years<br>Post-menopausal | Diagnosed: 1999-2008<br>Follow up= 9 year | Invasive breast cancer<br>73.1% ER/PR+<br>Metastatic breast cancer; 65.5% HER2- | From records at<br>study entry | Overall<br>survival(n=288)                                               | ≥30 vs <20 kg/m <sup>2</sup>   | 1.46 (0.83 - 2.58)   | Unadjusted |

|                                                                                                           |                                                              |                                                           |                                                                                                                                                                                                                                                                                                      |                           |                                                                             |                                    |                              |                                                                                                                                                                                          |
|-----------------------------------------------------------------------------------------------------------|--------------------------------------------------------------|-----------------------------------------------------------|------------------------------------------------------------------------------------------------------------------------------------------------------------------------------------------------------------------------------------------------------------------------------------------------------|---------------------------|-----------------------------------------------------------------------------|------------------------------------|------------------------------|------------------------------------------------------------------------------------------------------------------------------------------------------------------------------------------|
| Pittsburgh Cancer Institute (UPCI) Breast Cancer Project, United States                                   |                                                              |                                                           |                                                                                                                                                                                                                                                                                                      |                           |                                                                             |                                    |                              |                                                                                                                                                                                          |
| BMI – Included, non-linear meta-analysis                                                                  |                                                              |                                                           |                                                                                                                                                                                                                                                                                                      |                           |                                                                             |                                    |                              |                                                                                                                                                                                          |
| Lara-Medina, 2011 <sup>306</sup> , National Cancer Institute, Mexico Review Study, Mexico, BMI - Excluded | Retrospective cohort study (n= 2074 ) Age range:20-74        | Diagnosis year: 1998-2008 Follow up= 17 months 209 deaths | Invasive breast cancer; AJCC stages: 9.7% I, 34.6% II, 44% III, 11.7% IV All patients underwent re-excision; Radiotherapy: 63%                                                                                                                                                                       | From records              | 5-year survival patients with                                               | ≥30 vs <30 kg/m <sup>2</sup>       | P log-rank test = 0.121      | Unadjusted                                                                                                                                                                               |
|                                                                                                           |                                                              |                                                           |                                                                                                                                                                                                                                                                                                      |                           | 5-year cancer-specific survival patients with Triple-Negative Breast Cancer | ≥30 vs <30 kg/m <sup>2</sup>       | P log-rank test = 0.73       | Unadjusted                                                                                                                                                                               |
| Majed, 2011 <sup>186</sup> , Curie Institute Breast Cancer Group (CIBCG), France BMI – Included, review   | Prospective cohort study (n= 15116 ) Pre- and postmenopausal | Follow up= maximal 24 years Diagnosis year: 1981-1999     | Invasive breast cancer Stages: 85% I and II 50.1% ER+, 17% ER-, 32.9% unknown; 49.4% PR+, 23.8% PR-, 26.8% unknown Mastectomy: 13.8% Lumpectomy: 52.6% Chemotherapy: 15.1% Radiotherapy: 18.5% Chemo and hormonotherapy 30.6% Hormonotherapy alone: 17.4%, 52% none; Final surgical treatment: 29.1% | Measured at diagnosis     | Contralateral Breast Cancer 0-24 years of follow up                         | ≥30 vs <30 kg/m <sup>2</sup>       | 1.19 ( 0.97 - 1.47 ) P =0.05 | initial delivered treatment, tumor histology, hormonal receptor status, number of axillary invaded nodes, family history of breast cancer, Age, menopausal status, period of recruitment |
| Maskarinec G, 2011 <sup>93</sup> , Patterns of Care and Outcomes for                                      | Prospective cohort study of cancer survivors                 | Diagnosed: 1995-1996 Follow up= 13.2 years 115 deaths     | Invasive and in situ breast cancer Stages 0-IV, two thirds at stage 0 or I                                                                                                                                                                                                                           | From record, at-diagnosis | All-cause mortality(n=115)                                                  | ≥30 vs 18.5-24.9 kg/m <sup>2</sup> | 2.06 (1.23 - 3.44)           | Age at diagnosis, ethnicity, menopausal status, Adherence to treatment guidelines,                                                                                                       |

|                                                                                                         |                                                                                                             |                                                                    |                                                                                                                                                                                                                                                                                        |                   |                                                                                                                                          |                                    |                                                                                                                  |                                                                                                                                                                     |
|---------------------------------------------------------------------------------------------------------|-------------------------------------------------------------------------------------------------------------|--------------------------------------------------------------------|----------------------------------------------------------------------------------------------------------------------------------------------------------------------------------------------------------------------------------------------------------------------------------------|-------------------|------------------------------------------------------------------------------------------------------------------------------------------|------------------------------------|------------------------------------------------------------------------------------------------------------------|---------------------------------------------------------------------------------------------------------------------------------------------------------------------|
| Patients with Breast Cancer (POCO), Hawaii, United States,<br><br>BMI – Included, meta-analysis         | (n= 382) mean age: 59.3 years<br><br>Pre- and postmenopausal<br><br>Multi-ethnic<br><br>Response rate 48.2% | 43 breast cancer deaths<br><br>72 other causes of deaths           | 69.1% received recommended treatment, including 28.5% with additional treatment<br><br>30.9% did not receive recommended treatment<br><br>About 30% had ≥1 concomitant chronic condition                                                                                               |                   |                                                                                                                                          |                                    |                                                                                                                  | Tumour stage, Hormone receptor status, Toxicity, Comorbidity, Health insurance                                                                                      |
|                                                                                                         |                                                                                                             |                                                                    |                                                                                                                                                                                                                                                                                        |                   | Breast cancer mortality(n=43)                                                                                                            | ≥30 vs 18.5-24.9 kg/m <sup>2</sup> | 2.99 (1.22 - 7.33)                                                                                               |                                                                                                                                                                     |
| Melhem-Bertrandt A, 2011 <sup>393</sup> , MD Anderson Cancer Center, (MDACC), USA<br><br>BMI - Excluded | Female, Retrospective Cohort of Cancer Survivors (n=1413) Mostly White                                      | Diagnosed:1995-2007 (treatment) follow Up: Median 55 and 63 months | Breast cancer stage I 4%, II 54%, III 41%; nuclear grade I 4%, II 32%, III 62%; HER2 negative 81% and positive 18%; triple-negative 27%<br>Chemotherapy 100%, at the completion of chemotherapy, all patients underwent surgery and radiation therapy as indicated                     | Registry database | Overall survival<br><br>Recurrence free survival<br><br>Triple-negative Overall survival<br><br>Triple-negative Recurrence free survival | ≥30 vs <25 kg/m <sup>2</sup>       | 1.25(0.95-1.64) P=0.11<br><br>1.16(0.90-1.50) P=0.26<br><br>0.96(0.61-1.50) P=0.85<br><br>0.97(0.63-1.50) P=0.89 | Age, diabetes, HER2 status , hormone receptor status, hypertension, lymphovascular invasion , other factors, race, triple-negative status, tumor grade, tumor stage |
| Pfeiler, 2011 <sup>193</sup> , ABCSG-12, Austria, Germany<br><br>BMI – Included, review                 | Prospective cohort study (n= 1684 ) Premenopausal                                                           | Follow up= 62.6 months.                                            | Invasive:1684 ER-, ER low expression (+), ER(++), ER (+++), PR-, PR (+), PR(++), PR (+++), PR unknown. Cancer stage: T1a, T1b, T1c, T2, T3<br>Tumor grade: G1, G2, G3, Gx, lobular Surgery breast retaining, radically modified; Preparative chemotherapy Complete axillary dissection | At study entry    | Overall survival (n=66)                                                                                                                  | ≥25 vs 18.5-24.9 kg/m <sup>2</sup> | 1.49 ( 0.92 - 2.43 )<br><br>P = 0.1                                                                              | Tumor stage, Nodal status, grade, ER status, PR status, Age                                                                                                         |
|                                                                                                         |                                                                                                             |                                                                    |                                                                                                                                                                                                                                                                                        |                   | Overall survival (n=24)<br>Tamoxifen                                                                                                     | ≥25 vs 18.5-24.9 kg/m <sup>2</sup> | 0.83 ( 0.35 - 1.93 )                                                                                             |                                                                                                                                                                     |

|                                                                                                                                            |                                                                                                            |                                      |                                                                       |              |                                             |                                                        |                                                                                                                           |            |
|--------------------------------------------------------------------------------------------------------------------------------------------|------------------------------------------------------------------------------------------------------------|--------------------------------------|-----------------------------------------------------------------------|--------------|---------------------------------------------|--------------------------------------------------------|---------------------------------------------------------------------------------------------------------------------------|------------|
|                                                                                                                                            |                                                                                                            |                                      |                                                                       |              | Overall survival (n=42)<br>Anastrozole      | ≥25 vs 18.5-24.9 kg/m <sup>2</sup>                     | 2.14 (1.17-3.92)                                                                                                          |            |
|                                                                                                                                            |                                                                                                            |                                      |                                                                       |              | Disease-free survival (n=179)               | ≥25 vs 18.5-24.9 kg/m <sup>2</sup>                     | 1.24 ( 0.92 - 1.68 )<br>P = 0.15                                                                                          |            |
|                                                                                                                                            |                                                                                                            |                                      |                                                                       |              | Disease-free survival (n=86)<br>Tamoxifen   | ≥25 vs 18.5-24.9 kg/m <sup>2</sup>                     | 0.94 ( 0.60 - 1.46 )                                                                                                      |            |
|                                                                                                                                            |                                                                                                            |                                      |                                                                       |              | Disease-free survival (n=93)<br>Anastrozole | ≥25 vs 18.5-24.9 kg/m <sup>2</sup>                     | 1.60 ( 1.06 - 2.41 )                                                                                                      |            |
| Pritchard, 2011 <sup>323</sup><br>The NCIC CTG MA.21 trial<br>Canada<br><br>BMI - Excluded                                                 | Retrospective cohort study (n=667)<br>Mean age 60.1 years<br>postmenopausal women<br>Recruitment 1996-2000 | Follow up 7.9 years                  | Breast Adenocarcinoma                                                 | From records | Event free survival (n=220)                 | Higher vs lower BMI                                    | Beta coefficient -0.29, SE = 0.15<br><br>“Lower BMI was significantly associated with longer EFS p<0.001”                 | Unadjusted |
| Sarkissyan, 2011 <sup>328</sup> , African-American and Hispanic Breast Cancer Survivors, Los Angeles, United States,<br><br>BMI - Excluded | Retrospective cohort study (n=471 ) Recruitment 1995-2007                                                  | Follow up= not reported              | Invasive breast cancer Stages I-IV                                    | From records | 5y disease free survival                    | ≥30 vs <30 kg/m <sup>2</sup>                           | P log-rank test = 0.045                                                                                                   | Unadjusted |
|                                                                                                                                            |                                                                                                            |                                      |                                                                       |              | 5y disease free survival                    | ≥28 vs <28 kg/m <sup>2</sup>                           | P log-rank test = 0.019                                                                                                   | Unadjusted |
| Singh, 2011 <sup>336</sup> , Breast Cancer Study, India<br><br>BMI - Excluded                                                              | Prospective cohort study (n=309 )<br>Pre- and postmenopausal mean age:47.54                                | Surgery 2005-2009 Follow up= 4 years | Invasive primary breast cancer 86.3%;<br>Benign breast disease: 13.7% | Measured     | Overall survival                            | Underwt<br>Normal<br>Overweight<br>Obese I<br>Obese II | Obesity is a significant risk factor for 3-year mortality in patients; normal and underweight may confer survival benefit | Unadjusted |
|                                                                                                                                            |                                                                                                            |                                      |                                                                       |              | Metastasis                                  | Underwt<br>Normal<br>Overweight<br>Obese I<br>Obese II |                                                                                                                           | Unadjusted |

|                                                                                                                        |                                                                                                                                                    |                                                                                                                                                                 |                                                                                                                                                                                                                                                                                                  |                                                                                                                                                           |                                                                                               |                                      |                                              |                                                                                                                                                                                                                                                                                                                                                |
|------------------------------------------------------------------------------------------------------------------------|----------------------------------------------------------------------------------------------------------------------------------------------------|-----------------------------------------------------------------------------------------------------------------------------------------------------------------|--------------------------------------------------------------------------------------------------------------------------------------------------------------------------------------------------------------------------------------------------------------------------------------------------|-----------------------------------------------------------------------------------------------------------------------------------------------------------|-----------------------------------------------------------------------------------------------|--------------------------------------|----------------------------------------------|------------------------------------------------------------------------------------------------------------------------------------------------------------------------------------------------------------------------------------------------------------------------------------------------------------------------------------------------|
| von Drygalski A, 2011 <sup>349</sup> , United States<br><br>BMI - Excluded                                             | Retrospective cohort of cancer survivors (n= 96 ) Pre- and postmenopausal mean age: 43 years                                                       | Treatment 1989-1999 Follow up= 65 months                                                                                                                        | Invasive breast cancer ER- 37.5%, ER+ 59.4%, unknown metastatic breast cancer 3.1%; Stage I 21.9%, II 44.8%, III 24.0%, IV 8.3%, 1.0% unknown Received high-dose chemotherapy with autologous stem cell support (HD-ASCT)                                                                        | From records at the time of high-dose chemotherapy with autologous stem cell support                                                                      | Overall survival                                                                              | ≥ 30 vs < 30 kg/m <sup>2</sup>       | 1.82 ( 1.03 - 3.23 )                         | Tumor stage, site of metastasis                                                                                                                                                                                                                                                                                                                |
| Chen X, 2010 <sup>55</sup> , Shanghai Breast Cancer Survival Study (SBCSS), China<br><br>BMI – Included, meta-analysis | Prospective cohort study of cancer survivors (n= 5042)<br><br>Pre- and postmenopausal (51.1%)<br><br>Mean age: 53.5 years<br><br>Response rate 80% | 2002-2006<br><br>Average 6.5 months from diagnosis to study enrolment<br><br>Follow up= 46 months<br><br>442 deaths<br><br>534 relapses or breast cancer deaths | Invasive and in situ breast cancer<br><br>Stage 0-I 36.4%<br><br>IIA 32.6%, IIB 16.6%, III-IV 9.8%<br><br>ER+/PR+ 49.9%<br><br>ER-/PR- 27.6%<br><br>ER+/PR- or ER-/PR+ 20.4%<br><br>Mastectomy: 93.9%<br>Chemotherapy: 91.2%<br><br>Radiotherapy: 32.1%<br>tamoxifen: 52%<br><br>Comorbidity 20% | Self-reported weight at 1 year prior to diagnosis and at diagnosis, weight measured approximately 6 and 18 months after diagnosis<br><br>BMI at diagnosis | Self-reported and record linkage with vital statistics database<br><br>Total mortality(n=442) | <18.5 vs 18.5-24.9 kg/m <sup>2</sup> | 1.45 (0.92 - 2.28)                           | Multivariable adjusted model: age at diagnosis, comorbidity, time from diagnosis to study enrolment, menopausal status, menopausal symptoms, chemotherapy, surgery type, radiotherapy, tamoxifen use, receptor status, TNM stage, immunotherapy, exercise, meat intake, cruciferous vegetables, soy protein, education, income, marital status |
|                                                                                                                        |                                                                                                                                                    |                                                                                                                                                                 |                                                                                                                                                                                                                                                                                                  |                                                                                                                                                           | Total mortality(n=442)                                                                        | ≥30 vs 18.5-24.9 kg/m <sup>2</sup>   | 1.55 (1.10 - 2.17)                           |                                                                                                                                                                                                                                                                                                                                                |
|                                                                                                                        |                                                                                                                                                    |                                                                                                                                                                 |                                                                                                                                                                                                                                                                                                  |                                                                                                                                                           | Total mortality(n=276)<br>TNM 0-II stage                                                      | ≥30 vs 18.5-24.9 kg/m <sup>2</sup>   | 1.53 (0.98- 2.39)                            | As above multivariable adjusted model, without TNM stage                                                                                                                                                                                                                                                                                       |
|                                                                                                                        |                                                                                                                                                    |                                                                                                                                                                 |                                                                                                                                                                                                                                                                                                  |                                                                                                                                                           | Total mortality(n=145)<br>TNM III-IV stage                                                    | ≥30 vs 18.5-24.9 kg/m <sup>2</sup>   | 1.99 (1.08-3.65)<br><br>P interaction = 0.91 |                                                                                                                                                                                                                                                                                                                                                |

|  |  |  |  |                  |                                                                            |                                         |                                            |                                                                  |
|--|--|--|--|------------------|----------------------------------------------------------------------------|-----------------------------------------|--------------------------------------------|------------------------------------------------------------------|
|  |  |  |  |                  | Total mortality<br>Comorbidity<br>index = 0 (n=337)                        | <18.5 vs 18.5-24.9<br>kg/m <sup>2</sup> | 1.19 (0.71 - 1.98)                         | As above multivariable<br>adjusted model,<br>without comorbidity |
|  |  |  |  |                  |                                                                            | ≥30 vs 18.5-24.9<br>kg/m <sup>2</sup>   | 1.28 (0.81 - 2.01)                         |                                                                  |
|  |  |  |  |                  | Total mortality<br>Comorbidity<br>index = 1 (n=105)                        | <18.5 vs 18.5-24.9<br>kg/m <sup>2</sup> | 5.84 (2.11 - 16.10)                        |                                                                  |
|  |  |  |  |                  |                                                                            | ≥30 vs 18.5-24.9<br>kg/m <sup>2</sup>   | 1.95 (1.10 - 3.48)<br>P interaction = 0.15 |                                                                  |
|  |  |  |  | BMI at diagnosis | Relapse/disease-<br>specific<br>mortality(n=481)                           | <18.5 vs 18.5-24.9<br>kg/m <sup>2</sup> | 1.21 (0.76 - 1.91)                         | As above multivariable<br>adjusted model                         |
|  |  |  |  |                  |                                                                            | ≥30 vs 18.5-24.9<br>kg/m <sup>2</sup>   | 1.44 (1.02 - 2.03)                         |                                                                  |
|  |  |  |  |                  | Relapse/disease-<br>specific<br>mortality(n=317)<br>TNM 0-II stage         | ≥30 vs 18.5-24.9<br>kg/m <sup>2</sup>   | 1.67 (1.09-2.55)                           | As above multivariable<br>adjusted model,<br>without TNM stage   |
|  |  |  |  |                  | Relapse/disease-<br>specific<br>mortality(n=145)<br>TNM III-IV stage       | ≥30 vs 18.5-24.9<br>kg/m <sup>2</sup>   | 1.51 (0.78-2.94)<br>P interaction = 0.91   |                                                                  |
|  |  |  |  |                  | Relapse/disease-<br>specific mortality<br>Comorbidity<br>index = 0 (n=388) | <18.5 vs 18.5-24.9<br>kg/m <sup>2</sup> | 1.02 (0.61 - 1.69)                         | As above multivariable<br>adjusted model,<br>without comorbidity |
|  |  |  |  |                  |                                                                            | ≥30 vs 18.5-24.9<br>kg/m <sup>2</sup>   | 1.25 (0.80- 1.94)                          |                                                                  |
|  |  |  |  |                  | Relapse/disease-<br>specific mortality<br>Comorbidity<br>index = 1 (n=92)  | <18.5 vs 18.5-24.9<br>kg/m <sup>2</sup> | 4.86 (1.62 - 14.60)                        |                                                                  |



|                                                                                                                                              |                                                                                                         |                                                                                                                                                                        |                                                                                                                                                                                                                                                                                                                    |                                                                                  |                                |                                    |                                           |                                                                                      |
|----------------------------------------------------------------------------------------------------------------------------------------------|---------------------------------------------------------------------------------------------------------|------------------------------------------------------------------------------------------------------------------------------------------------------------------------|--------------------------------------------------------------------------------------------------------------------------------------------------------------------------------------------------------------------------------------------------------------------------------------------------------------------|----------------------------------------------------------------------------------|--------------------------------|------------------------------------|-------------------------------------------|--------------------------------------------------------------------------------------|
|                                                                                                                                              |                                                                                                         |                                                                                                                                                                        |                                                                                                                                                                                                                                                                                                                    |                                                                                  |                                | ≥30 vs 18.5-24.9 kg/m <sup>2</sup> | 2.26 (1.21-4.25)<br>P interaction = 0.122 |                                                                                      |
| Clough-Gorr, 2010 <sup>154</sup> , Follow-up of Older Breast Cancer Survivors, Four US Regions, United States,<br><br>BMI – Included, review | Prospective cohort of study (n= 660 )<br>Post-menopausal<br>Age ≥65 years                               | calendar year:1997-2006<br>Follow up= 7 years                                                                                                                          | Invasive breast cancer TNM stages: 51% I, 45% II, 3.8% III Mastectomy: 49%, breast-conserving surgery with radiation: 33%, without radiation: 16%, other: 2.6%;<br>Chemotherapy: 22%;<br>Tamoxifen: 75%                                                                                                            | Self-reported 3 months after definitive surgery                                  | Overall survival               | ≥30 vs <30 kg/m <sup>2</sup>       | 1.27 (0.89-1.81)                          | Age, Tumor stage, social class, Comorbidity, Physical function, Mental Health Index  |
| de Azambuja E, 2010 <sup>283</sup> ,<br>BIG 02-98, International,<br><br>BMI – Excluded                                                      | Secondary analysis of clinical trial (n= 2887)<br><br>Pre- and postmenopausal<br>Age range: 18-70 years | 1998-2001<br>Follow up= 62.5 months<br>403 deaths<br>368 breast cancer deaths<br>35 other deaths<br>70 second primary tumour including 20 second primary breast tumour | Node+ invasive breast cancer<br>Received<br>Docetaxel and doxorubicin-containing adjuvant chemotherapy<br><br>Dose capped at BSA of 2.0 m <sup>2</sup> since December 2000.<br><br>No evidence of under-treatment in obese patients.<br><br>20.3% obese and 21.3% non-obese patients had dose reductions (P = 0.6) | At study baseline, before 1 <sup>st</sup> cycle of chemotherapy, no further info | 5-year overall survival(n=403) | ≥35 vs 18.5-24.9 kg/m <sup>2</sup> | 1.56 (1.07 - 2.28)                        | Stratified for HR status, age, menopausal status and number of positive lymph nodes. |
|                                                                                                                                              |                                                                                                         |                                                                                                                                                                        |                                                                                                                                                                                                                                                                                                                    |                                                                                  |                                | ≥30 vs <30 kg/m <sup>2</sup>       | 1.36, P = 0.008                           | HR status, age, menopausal status, tumour size, number of positive lymph nodes       |

|                                                                                                                                                                                                  |                                                                                                                                            |                                                                                                                                                                             |                                                                                                                                                           |                                                          |                                                                                                                                                        |                                                                              |                                              |                                                                                                                                               |
|--------------------------------------------------------------------------------------------------------------------------------------------------------------------------------------------------|--------------------------------------------------------------------------------------------------------------------------------------------|-----------------------------------------------------------------------------------------------------------------------------------------------------------------------------|-----------------------------------------------------------------------------------------------------------------------------------------------------------|----------------------------------------------------------|--------------------------------------------------------------------------------------------------------------------------------------------------------|------------------------------------------------------------------------------|----------------------------------------------|-----------------------------------------------------------------------------------------------------------------------------------------------|
|                                                                                                                                                                                                  |                                                                                                                                            |                                                                                                                                                                             |                                                                                                                                                           |                                                          | 5-year disease-free survival(n=732)                                                                                                                    | ≥35 vs 18.5-24.9 kg/m <sup>2</sup>                                           | 1.10 (0.80- 1.50)                            | HR status, age, menopausal status and number of positive lymph nodes.                                                                         |
|                                                                                                                                                                                                  |                                                                                                                                            |                                                                                                                                                                             |                                                                                                                                                           |                                                          |                                                                                                                                                        | ≥30 vs <30 kg/m <sup>2</sup>                                                 | 1.20, P = 0.04                               | HR status, age, menopausal status, tumour size, number of positive lymph nodes                                                                |
| Flatt S, 2010 <sup>69</sup> , Women's Healthy Eating and Living (WHEL), United States<br><br>BMI – Excluded (mortality) (superseded by Nelson, 2016)<br><br>Included, meta-analysis (recurrence) | Secondary analysis of dietary intervention trial (n= 3088) Mean age: 52 years<br><br>Pre- and postmenopausal<br><br>Non-Hispanic white 85% | Diagnosed: 1991-2000<br><br>Follow up= 7.3 years<br><br>315 deaths<br><br>(83% BC-related, 8% not from any cancer)<br><br>518 breast cancer events (69% distal recurrences) | Invasive breast cancer<br>1190 stage I<br>1407 stage II<br>491 stage III<br>2286 ER+<br>756 ER- cases                                                     | Measured about 2 years after diagnosis                   | Self-reported and verified in medical records and death certificates<br><br>All-cause mortality (n=310)<br><br>Additional breast cancer events (n=511) | ≥30 vs 18.5-24.9 kg/m <sup>2</sup><br><br>≥30 vs 18.5-24.9 kg/m <sup>2</sup> | 1.28 (0.97 - 1.70)<br><br>1.10 (0.88 - 1.38) | Tumour grade, tumour stage, years between diagnosis and study entry, alcohol intake, education, ethnicity, smoking, parity, physical activity |
| Gao, 2010 <sup>163</sup> , China,<br><br>BMI – Included, review                                                                                                                                  | Retrospective cohort study (n= 593 ) mean age:44 calendar year:1992-1997 until 2008                                                        | Diagnosis year: 1992-1997 Follow up= 125 months                                                                                                                             | Node-positive; 196 stage II, 397 stage III Neoadjuvant therapy (CMF or CAF); adjuvant therapy (CMF, CAF, or CEF), hormone therapy for ER+ or PR+ patients | Before surgery                                           | Total mortality                                                                                                                                        | ≥28 vs <28 kg/m <sup>2</sup>                                                 | 1.565 ( 1.17 - 2.094 )                       | Age, Tumor size, lymph node metastasis , chemotherapy, radiotherapy, LVI: lymphovascular invasion                                             |
|                                                                                                                                                                                                  |                                                                                                                                            |                                                                                                                                                                             |                                                                                                                                                           |                                                          | Total mortality pre-menopausal                                                                                                                         | ≥28 vs <28 kg/m <sup>2</sup>                                                 | 1.872 ( 1.162 - 3.017 )                      | Tumor size, lymph node metastasis , chemotherapy, LVI: lymphovascular invasion                                                                |
|                                                                                                                                                                                                  |                                                                                                                                            |                                                                                                                                                                             |                                                                                                                                                           |                                                          | Total mortality post-menopausal                                                                                                                        | ≥28 vs <28 kg/m <sup>2</sup>                                                 | 1.363 ( 0.923 - 2.011 )                      | Age, Tumor size, lymph node metastasis , chemotherapy, LVI: lymphovascular invasion                                                           |
| Imkamp A, 2010 <sup>76</sup> , Kent, United Kingdom,                                                                                                                                             | Prospective cohort study of cancer survivors                                                                                               | 1983-2007<br><br>Follow up= 85 months                                                                                                                                       | Grade I-III<br>1218 ER+ cases                                                                                                                             | Self-reported on questionnaire at 1 <sup>st</sup> clinic | 7-year recurrence-free survival                                                                                                                        | ≥30 vs <30 kg/m <sup>2</sup>                                                 | 1.43 (1.12 - 1.83)<br><br>P trend<0.01       | Age, tumour size, tumour grade, lymph node status, vascular                                                                                   |

|                                                                                                                |                                                                  |                                                                                                                   |                                                                               |                            |                                               |                              |                                                             |                                                                                                  |
|----------------------------------------------------------------------------------------------------------------|------------------------------------------------------------------|-------------------------------------------------------------------------------------------------------------------|-------------------------------------------------------------------------------|----------------------------|-----------------------------------------------|------------------------------|-------------------------------------------------------------|--------------------------------------------------------------------------------------------------|
| BMI – Included, meta-analysis                                                                                  | (n= 2298) Pre- and postmenopausal<br>Mean age: 59.5 years        |                                                                                                                   | All received surgery and chemotherapy<br>1198 cases received radiotherapy     |                            |                                               |                              |                                                             | invasive, operation, adjuvant endocrine treatment, chemotherapy, radiotherapy, year of diagnosis |
|                                                                                                                |                                                                  |                                                                                                                   |                                                                               |                            |                                               | Per 1 kg/m <sup>2</sup>      | 1.02 (1.00 - 1.04)                                          |                                                                                                  |
| Sestak, 2010 <sup>106</sup> ,<br>Arimidex,<br>Tamoxifen Alone<br>or in Combination<br>(ATAC),<br>International | Secondary analysis of clinical trial (n= 4939)<br>Postmenopausal | Follow up= 100 months<br>481 breast cancer deaths<br>504 non-breast cancer deaths<br>878 breast cancer recurrence | Early-stage ER+ and/or PR+ invasive breast cancer<br>Tamoxifen or Anastrozole | Measured at trial baseline | Breast cancer deaths after recurrence (n=481) | ≥35 vs <23 kg/m <sup>2</sup> | 1.55 (1.10 - 2.19)<br>P trend≤0.001                         | Age, mastectomy, tumour size, tumour grade, nodal status, chemotherapy, radiotherapy, region     |
| BMI – Included, meta-analysis                                                                                  |                                                                  |                                                                                                                   |                                                                               |                            | Deaths without recurrence (n=504)             | ≥35 vs <23 kg/m <sup>2</sup> | 1.03 (0.71 - 1.50)<br>P trend=0.18                          |                                                                                                  |
|                                                                                                                |                                                                  |                                                                                                                   |                                                                               |                            | Breast cancer recurrence(n=854)               | ≥35 vs <23 kg/m <sup>2</sup> | 1.39 (1.06 - 1.82)<br>P trend=0.02                          |                                                                                                  |
|                                                                                                                |                                                                  |                                                                                                                   |                                                                               |                            | Distant recurrence(n=632)                     | ≥35 vs <23 kg/m <sup>2</sup> | 1.46 (1.07 - 1.61)<br>P trend=0.001                         |                                                                                                  |
|                                                                                                                |                                                                  |                                                                                                                   |                                                                               |                            | Breast cancer recurrence<br>Tamoxifen         | ≥35 vs <23 kg/m <sup>2</sup> | 1.18 (0.90-1.84)<br>P trend = 0.23                          |                                                                                                  |
|                                                                                                                |                                                                  |                                                                                                                   |                                                                               |                            | Breast cancer recurrence<br>Anastrozole       | ≥35 vs <23 kg/m <sup>2</sup> | 1.53 (1.01-2.32)<br>P trend = 0.001<br>P interaction = 0.04 |                                                                                                  |

|                                                                                                                                          |                                                                                                                                                                       |                                                                                             |                                                                                                                                                                                                                                                                                                                                                                                                         |                                              |                                                     |                                |                                            |                                                                                 |
|------------------------------------------------------------------------------------------------------------------------------------------|-----------------------------------------------------------------------------------------------------------------------------------------------------------------------|---------------------------------------------------------------------------------------------|---------------------------------------------------------------------------------------------------------------------------------------------------------------------------------------------------------------------------------------------------------------------------------------------------------------------------------------------------------------------------------------------------------|----------------------------------------------|-----------------------------------------------------|--------------------------------|--------------------------------------------|---------------------------------------------------------------------------------|
| Thivat E, 2010 <sup>204</sup> ,<br>Jean Perrin<br>Center, Clermont-<br>Ferrand Review<br>Study, France,<br><br>BMI – Included,<br>review | Retrospective<br>cohort of cancer<br>survivors (n= 111 )<br>Pre- and<br>postmenopausal,<br>age range: 32-74<br>years mean age:<br>54 years<br>Recruited until<br>2009 | Treatment 1976-<br>1989 Follow up=<br>from 19.4-27.6<br>years<br>57 deaths                  | Early stage and locally<br>advanced breast cancer;<br>42% ER+, 44% ER-, 35%<br>PR+, 47% PR-, 19% T1,<br>44% T2, 15% T3, 22%<br>T4;<br>Scarff-Bloom-<br>Richardson Grade I 8%,<br>55% II, 20% III<br>Anthracycline-based<br>chemotherapy: all<br>patients,<br>Tumourectomy: 66<br>cases, mastectomy: 44<br>cases, radiation 97%<br>(after chemotherapy),<br>hormonal therapy 44%<br>(90% with tamoxifen) | Measured at the<br>beginning of<br>treatment | Overall survival<br>(n=57)                          | ≥ 24 vs <24 kg/m <sup>2</sup>  | 1.49 ( 0.81 - 2.74 )                       | Nodal status, tumor<br>stage, menopausal<br>status, hormonal<br>therapy, weight |
|                                                                                                                                          |                                                                                                                                                                       |                                                                                             |                                                                                                                                                                                                                                                                                                                                                                                                         |                                              | Disease-free<br>survival (n=55)                     | ≥ 24 vs <24 kg/m <sup>2</sup>  | 1.59 ( 0.86 - 2.93 )                       |                                                                                 |
| Anderson, 2009<br><sup>262</sup> , NSABBP B-<br>13,14,19,20,23,<br>United States,<br><br>BMI - Excluded                                  | Secondary<br>analysis of clinical<br>trial (n= 3799 )<br>Pre- and<br>postmenopausal                                                                                   | Calendar<br>year:1981-1998<br>until 2007<br>Treatment1981-<br>1991 Follow up=<br>16.1 years | All invasive breast<br>cancer<br>Node-negative breast<br>cancer Underwent<br>lumpectomy and whole<br>breast irradiation; with<br>or without adjuvant<br>systemic therapy in RCT<br>trials                                                                                                                                                                                                               | No description                               | Overall survival<br>recurrent invasive<br>carcinoma | Q4 vs Q1                       | 1.3 ( 1.05 - 1.6 )<br><br>P trend=0.089    | Age, ER status, Race,<br>Tumor size                                             |
|                                                                                                                                          |                                                                                                                                                                       |                                                                                             |                                                                                                                                                                                                                                                                                                                                                                                                         |                                              | Overall survival<br>regional<br>recurrence          | Q4 vs Q1                       | 1.31 ( 1.06 - 1.61 )<br><br>P trend=0.0044 |                                                                                 |
| Chen, 2009 <sup>280</sup> ,<br>Chang Gung                                                                                                | Retrospective<br>cohort study (n=                                                                                                                                     | Follow up= 36<br>months                                                                     | Invasive breast cancer                                                                                                                                                                                                                                                                                                                                                                                  | From records<br>Undergoing                   | 5y locoregional<br>recurrence(n=27)                 | ≤24 vs >24.1 kg/m <sup>2</sup> | 6.24 ( 1.33 - 29.27 )                      | Unadjusted                                                                      |

|                                                                                                                 |                                                                                                                  |                                                                                         |                                                                                                                                                                                                                                                                             |                                     |                                          |                                           |                   |                                                                                                                                |
|-----------------------------------------------------------------------------------------------------------------|------------------------------------------------------------------------------------------------------------------|-----------------------------------------------------------------------------------------|-----------------------------------------------------------------------------------------------------------------------------------------------------------------------------------------------------------------------------------------------------------------------------|-------------------------------------|------------------------------------------|-------------------------------------------|-------------------|--------------------------------------------------------------------------------------------------------------------------------|
| Memorial Hospital Study, Taiwan, Taiwan, BMI - Excluded                                                         | 858 ) Pre- and postmenopausal mean age:45 calendar year:1998-2005                                                |                                                                                         |                                                                                                                                                                                                                                                                             | breast conserving therapy           |                                          |                                           |                   |                                                                                                                                |
| Eralp, 2009 <sup>286</sup> , MD Anderson Cancer Center (MDACC), Texas Review Study, BMI - Excluded              | Retrospective cohort study of cancer survivors (n=110) Premenopausal, age range: 22-35 years, mean age: 32 years | Follow up= 43 months<br>17 deaths<br>50 recurrence                                      | In situ breast cancer 59% +ve, 39% -ve 51% stage II, 49% stage III, 75% grade III Neoadjuvant chemotherapy treatment (anthracycline-based combinations, with or without taxanes)                                                                                            | From records, prior to chemotherapy | Overall survival (n=17)                  | 29.2-48.7 vs 18.1-22.1 kg/ m <sup>2</sup> | Not significant   | Tumor grade, stage, ethnicity, hormone receptor status, nodal status                                                           |
|                                                                                                                 |                                                                                                                  |                                                                                         |                                                                                                                                                                                                                                                                             |                                     | Disease free survival (n=50)             | 29.2-48.7 vs 18.1-22.1 kg/ m <sup>2</sup> | Not significant   |                                                                                                                                |
| Li C, 2009 <sup>87</sup> , Seattle-Puget Sound Region, United States, BMI – Included, meta-analysis             | Nested case-control study (n= 1091) Pre- and postmenopausal Age range: 40-79 years                               | 1990-2005 Follow up= 17 years<br>365 contralateral breast cancers                       | ER+ breast cancer Invasive:1091 AJCC stages: 67.4% I, 32.6% II or III; Tumour size (cm): 33.4% ≤ 1.0, 41.7% 1.1-2.0, 21.9% >2, 3% missing Chemotherapy: 26.1% yes, 73.9% no; Radiotherapy: 65.4% yes, 34.6% no, 0.1% missing; Adjuvant hormone therapy: 66.8% yes, 33.2% no | Interview                           | Contralateral Breast Cancer(n=355)       | ≥30 vs <25 kg/m <sup>2</sup>              | 1.5 (1 - 2.1)     | Age, year of diagnosis, tumour stage, survival time, hormonal therapy, chemotherapy, HRT, county, race                         |
| Majed B, 2009 <sup>90</sup> , Curie Institute Breast Cancer Group (CIBCG), France BMI – Included, meta-analysis | Prospective cohort study of breast cancer survivors (n= 14709) Pre- and postmenopausal                           | 1981-1999 Follow up= 8 years 1009 contralateral recurrences, 555 second primary cancers | First unilateral breast cancer without distant dissemination                                                                                                                                                                                                                | Measured                            | Overall survival(n=2558) Training sample | stout vs non stout                        | 1.11 (1.02 - 1.2) | Age, menopausal status, tumour size, receptor status, nodal status, surgery type, hormonal therapy, chemotherapy, radiotherapy |

|                                     |  |  |  |  |                                                      |                    |                      |  |
|-------------------------------------|--|--|--|--|------------------------------------------------------|--------------------|----------------------|--|
| (Results superseded by Majed, 2008) |  |  |  |  |                                                      |                    |                      |  |
| (Results superseded by Majed, 2008) |  |  |  |  | Overall survival(n=1135)<br>Validation sample        | stout vs non stout | 1.16 (1.02 - 1.32)   |  |
| (Results superseded by Majed, 2008) |  |  |  |  | Disease-free survival(n=3416)<br>Training sample     | stout vs non stout | 1.1 (1.02 - 1.18)    |  |
| (Results superseded by Majed, 2008) |  |  |  |  | Disease-free survival(n=1460)<br>Validation sample   | stout vs non stout | 1.05 ( 0.93 - 1.18 ) |  |
|                                     |  |  |  |  | Node recurrence(n=227 )<br>Training sample           | stout vs non stout | 0.78 ( 0.59 - 1.05 ) |  |
|                                     |  |  |  |  | Node recurrence(n=96)<br>Validation sample           | stout vs non stout | 1.36 ( 0.83 - 2.25 ) |  |
| (Results superseded by Majed, 2008) |  |  |  |  | Locoregional recurrence(n=1442)<br>Training sample   | stout vs non stout | 0.97 ( 0.86 - 1.09 ) |  |
| (Results superseded by Majed, 2008) |  |  |  |  | Locoregional recurrence(n=627 )<br>Validation sample | stout vs non stout | 0.98 ( 0.82 - 1.17 ) |  |
| (Results superseded by Majed, 2008) |  |  |  |  | Distant metastases(n=2634)<br>Training sample        | stout vs non stout | 1.15 ( 1.07 - 1.25 ) |  |
| (Results superseded by Majed, 2008) |  |  |  |  | Distant metastases(n=1146)<br>Validation sample      | stout vs non stout | 1.1 (0.97 - 1.24)    |  |
| (Results superseded by Majed, 2008) |  |  |  |  | Contralateral Breast                                 | stout vs non stout | 1.33 (1.14 - 1.56)   |  |

|                                                                                                                                                                         |                                                                             |                                      |                                                                                                                                                                                                                                                                                                                                                                                                                                                                                   |                                       |                                                         |                                      |                      |                                                                                                        |
|-------------------------------------------------------------------------------------------------------------------------------------------------------------------------|-----------------------------------------------------------------------------|--------------------------------------|-----------------------------------------------------------------------------------------------------------------------------------------------------------------------------------------------------------------------------------------------------------------------------------------------------------------------------------------------------------------------------------------------------------------------------------------------------------------------------------|---------------------------------------|---------------------------------------------------------|--------------------------------------|----------------------|--------------------------------------------------------------------------------------------------------|
|                                                                                                                                                                         |                                                                             |                                      |                                                                                                                                                                                                                                                                                                                                                                                                                                                                                   |                                       | Cancer(n=690)<br>Training sample                        |                                      |                      |                                                                                                        |
| (Results included in dose-response meta-analysis)                                                                                                                       |                                                                             |                                      |                                                                                                                                                                                                                                                                                                                                                                                                                                                                                   |                                       | Contralateral Breast Cancer(n=319)<br>Validation sample | stout vs non stout                   | 1.04 (0.82 - 1.32)   |                                                                                                        |
|                                                                                                                                                                         |                                                                             |                                      |                                                                                                                                                                                                                                                                                                                                                                                                                                                                                   |                                       | Second primary cancers(n=380)<br>Training sample        | stout vs non stout                   | 1.81 (1.37 - 2.38)   |                                                                                                        |
|                                                                                                                                                                         |                                                                             |                                      |                                                                                                                                                                                                                                                                                                                                                                                                                                                                                   |                                       | Second primary cancers(n=175)<br>Validation sample      | stout vs non stout                   | 0.76 (0.44 - 1.31)   |                                                                                                        |
| Moon, 2009 <sup>189</sup> , Korean Breast Cancer Registry (KBCR), Seoul National University Hospital Breast Care Center (SNUHBCC), Korea, Korea, BMI – Included, review | Retrospective cohort study (n= 29043 ) Pre- and post-menopausal mean age:48 | Breast surgery: 1982-2006 Follow up= | Invasive breast cancer KBCR: 59% ER+, 41% ER-, 53.7% PR+, 46.3% PR-; SNUHBCC: 58% ER+, 42% ER-, 46.6% PR+, 53.4% PR- Nonmetastatic, invasive breast cancer; histologic grades of KBCR patients: 62.8% 1-2, 37.2% 3; histologic grades of SNUHBCC patients: 57.1% grade 1-2, 42.9% grade 3 Among those with data: Chemotherapy: 79.6% yes, 20.4% no KBCR patients, 73.4% yes, 26.6% no SNUHBCC; Hormonal treatment: 62.5% yes, 37.5% no KBCR patients, 50.7% yes, 49.3% no SNUHBCC | From records at the time of diagnosis | Overall survival KBCR                                   | ≥25 vs 18.5-24.9 kg/m <sup>2</sup>   | 0.96 ( 0.87 - 1.02 ) | Age, Tumor size, Tumor stage, Nodal status, ER status, PR status, Tumor grade, Lymphovascular invasion |
|                                                                                                                                                                         |                                                                             |                                      |                                                                                                                                                                                                                                                                                                                                                                                                                                                                                   |                                       | Breast cancer-specific mortality KBCR                   | 18.5-24.9 vs ≤18.4 kg/m <sup>2</sup> | 1.49 ( 1.15 - 1.93 ) |                                                                                                        |

|                                                                                                                                    |                                                                                                                                                                                                                                                                                                               |                                                                                                                                           |                                                                                                               |                                                                            |                                                                         |                                       |                      |                                                                                                                                                                                                                                                                                                                                         |
|------------------------------------------------------------------------------------------------------------------------------------|---------------------------------------------------------------------------------------------------------------------------------------------------------------------------------------------------------------------------------------------------------------------------------------------------------------|-------------------------------------------------------------------------------------------------------------------------------------------|---------------------------------------------------------------------------------------------------------------|----------------------------------------------------------------------------|-------------------------------------------------------------------------|---------------------------------------|----------------------|-----------------------------------------------------------------------------------------------------------------------------------------------------------------------------------------------------------------------------------------------------------------------------------------------------------------------------------------|
|                                                                                                                                    |                                                                                                                                                                                                                                                                                                               |                                                                                                                                           |                                                                                                               |                                                                            | Overall survival<br>SNUHBCC                                             | ≥30 vs 18.5-24.9<br>kg/m <sup>2</sup> | 1.35 ( 0.8 - 2.27 )  | Age, Tumor size, Tumor stage, Nodal status, ER status, PR status, Tumor grade, Lymphovascular invasion, chemotherapy, Hormonal therapy                                                                                                                                                                                                  |
|                                                                                                                                    |                                                                                                                                                                                                                                                                                                               |                                                                                                                                           |                                                                                                               |                                                                            | Disease-free survival<br>SNUHBCC                                        | ≥30 vs 18.5-24.9<br>kg/m <sup>2</sup> | 1.28 ( 0.74 - 2.22 ) |                                                                                                                                                                                                                                                                                                                                         |
|                                                                                                                                    |                                                                                                                                                                                                                                                                                                               |                                                                                                                                           |                                                                                                               |                                                                            | Locoregional recurrence<br>SNUHBCC                                      | ≥30 vs 18.5-24.9<br>kg/m <sup>2</sup> | 0.27 ( 0.03 - 1.97 ) |                                                                                                                                                                                                                                                                                                                                         |
|                                                                                                                                    |                                                                                                                                                                                                                                                                                                               |                                                                                                                                           |                                                                                                               |                                                                            | Distant metastases<br>SNUHBCC                                           | ≥30 vs 18.5-24.9<br>kg/m <sup>2</sup> | 1.23 ( 0.64 - 2.36 ) |                                                                                                                                                                                                                                                                                                                                         |
| Nichols HB, 2009 <sup>100</sup> , Collaborative Women's Longevity Study (CWLS), United States<br><br>BMI – Included, meta-analysis | Follow-up of cases of case-control studies (final n= 3993)<br><br>Pre- and postmenopausal<br>Mean age:58.4 years<br>White >98%<br><br>Recruited on average 5.8 years after diagnosis<br><br>Response rate 40%<br><br>Excluded women with breast cancer recurrence before enrolment (n= 553), or unintentional | Diagnosed: 1988-1999, Follow up= 6.3 years<br><br>421 deaths<br><br>121 breast cancer deaths<br><br>95 deaths from cardiovascular disease | Invasive non-metastatic breast cancer<br>Local 64.1%<br>Regional 24.7%<br>Distant 0.6%<br>Unknown stage 10.6% | Self-reported at about 5.8 years post-diagnosis in follow-up questionnaire | Record linkage with National Death Index<br><br>Total mortality (n=405) | ≥30 vs 18.5-24.9<br>kg/m <sup>2</sup> | 1.27 (0.99 - 1.64)   | Age, tumour stage, time between diagnosis and enrolment, family history of breast cancer, post-diagnosis smoking, recreational physical activity in follow-up, post-diagnosis menopausal status<br><br>(breast cancer treatment modality and postmenopausal hormone use did not influence results and were not included in final model) |



|                                                                                                                        |                                                                                                                                                                                        |                                                                                                                                                                                                                     |                                                                                                              |                                     |                                                                                                       |                                    |                    |                                                                                                                          |
|------------------------------------------------------------------------------------------------------------------------|----------------------------------------------------------------------------------------------------------------------------------------------------------------------------------------|---------------------------------------------------------------------------------------------------------------------------------------------------------------------------------------------------------------------|--------------------------------------------------------------------------------------------------------------|-------------------------------------|-------------------------------------------------------------------------------------------------------|------------------------------------|--------------------|--------------------------------------------------------------------------------------------------------------------------|
|                                                                                                                        | weight loss (n=262)                                                                                                                                                                    |                                                                                                                                                                                                                     |                                                                                                              |                                     |                                                                                                       |                                    |                    |                                                                                                                          |
|                                                                                                                        |                                                                                                                                                                                        |                                                                                                                                                                                                                     |                                                                                                              |                                     | Breast cancer-specific mortality (n=117)                                                              | ≥30 vs 18.5-24.9 kg/m <sup>2</sup> | 2.28 (1.43 - 3.64) |                                                                                                                          |
|                                                                                                                        |                                                                                                                                                                                        |                                                                                                                                                                                                                     |                                                                                                              |                                     | Cardiovascular disease mortality (n=90)                                                               | ≥30 vs 18.5-24.9 kg/m <sup>2</sup> | 1.65 (0.97 - 2.83) |                                                                                                                          |
| Olsson A, 2009 <sup>101</sup> , Malmo Mammographic Screening Trial (MMST), Sweden<br><br>BMI – Included, meta-analysis | Randomised controlled trial of mammography screening (n=2794 )<br><br>(pre-screening 1568, invited 656 control 570 women)<br><br>Pre- and postmenopausal<br><br>Age range: 45-69 years | 1961-1991<br><br>Follow up= 10 years (max)<br><br>1318 deaths<br><br>(pre-screening 862, invited 210 control 246 deaths)<br><br>817 breast cancer deaths<br><br>(pre-screening 564, invited 111 control 142 deaths) | Invasive breast cancer, any stages including distant metastasis<br><br>No non-surgical treatment information | Measured/self-reported at diagnosis | Death Registry<br><br>10-year breast cancer-specific mortality(n=564)<br><br>Pre-screening/historical | ≥30 vs 20-<25 kg/m <sup>2</sup>    | 1.04 (0.74 - 1.47) | Age at diagnosis, menopausal status, histology , tumour size, Date of diagnosis, nodal status, clinical site, metastasis |
|                                                                                                                        |                                                                                                                                                                                        |                                                                                                                                                                                                                     |                                                                                                              |                                     | 10-year breast cancer-specific mortality(n=111)<br><br>Screened                                       | ≥30 vs 20-<25 kg/m <sup>2</sup>    | 1.01 (0.41 - 2.50) |                                                                                                                          |
|                                                                                                                        |                                                                                                                                                                                        |                                                                                                                                                                                                                     |                                                                                                              |                                     | 10-year breast cancer-specific mortality(n=142)<br><br>Not screened                                   | ≥30 vs 20-<25 kg/m <sup>2</sup>    | 2.08 (1.13 - 3.81) |                                                                                                                          |
| Shu, 2009 <sup>335</sup> , Shanghai Breast                                                                             | Prospective cohort study (n=                                                                                                                                                           | Diagnosis year: 2002-2006 Follow                                                                                                                                                                                    | Invasive and in situ 63.2% ER+, 35.2% ER-,                                                                   | 6.5 months after diagnosis          | 5-year survival(n=442)                                                                                | ≥30 vs <25 kg/m <sup>2</sup>       | P = 0.01           | Unadjusted                                                                                                               |

|                                                                                                                                                |                                                                                                        |                                                                              |                                                                                                                                                                                                                                                                      |                                                                  |                                        |                                   |                                        |                                            |
|------------------------------------------------------------------------------------------------------------------------------------------------|--------------------------------------------------------------------------------------------------------|------------------------------------------------------------------------------|----------------------------------------------------------------------------------------------------------------------------------------------------------------------------------------------------------------------------------------------------------------------|------------------------------------------------------------------|----------------------------------------|-----------------------------------|----------------------------------------|--------------------------------------------|
| Cancer Survival Study (SBCSS), China,<br>BMI - Excluded                                                                                        | 5042 ) Pre- and postmenopausal age range:20-75                                                         | up= 3.9 years 444 deaths and 534 recurrences or breast cancer–related deaths | 1.6% missing; 57.5% PR+, 40.6% PR-, 1.9% missing TNM stages: 85.8% 0-II, 9.8% III-IV, 4.4% Unknown Radical mastectomy: 92.6% yes, 7.4% no; Radiotherapy: 32.1% yes, 67.9% no; Chemotherapy: 91.2% yes, 8.8% no; Tamoxifen: 52.1% yes, 47.9% no among those with data |                                                                  |                                        |                                   |                                        |                                            |
| Barnett, 2008 <sup>142</sup> , Studies of Epidemiology and Risk Factors in Cancer Heredity (SEARCH), United Kingdom,<br>BMI – Included, review | Prospective cohort study (n= 4560, 4346 in analysis)<br>Pre- and postmenopausal<br>Mean age:51.5 years | 1991-2005 Follow up= range 0.47-10 years<br>Total 620 deaths                 | Invasive breast cancer<br>73% incident and 27% prevalent<br>Stage I 49.7%<br>Stage II 45.8%<br>Stage III 3.3%<br>Stage IV 1.1%<br>ER+ 81.2%<br>ER- 18.7%                                                                                                             | Self-administered questionnaire, at various time after diagnosis | Total mortality (n=586)                | ≥28.5 vs ≤ 22.7 kg/m <sup>2</sup> | 1.23 ( 0.94 - 1.62 )                   | Age at diagnosis, Tumor stage, Tumor grade |
|                                                                                                                                                |                                                                                                        |                                                                              |                                                                                                                                                                                                                                                                      |                                                                  | Total mortality (n=586)                | Per 1 kg/m <sup>2</sup>           | 1.03 ( 1.01 - 1.04 )                   | Unadjusted                                 |
|                                                                                                                                                |                                                                                                        |                                                                              |                                                                                                                                                                                                                                                                      |                                                                  | Total mortality (n=193)<br>ER positive | ≥28.5 vs ≤ 22.7 kg/m <sup>2</sup> | 2.28 ( 1.45 - 3.58 )<br>P trend=0.0003 | Unadjusted                                 |
|                                                                                                                                                |                                                                                                        |                                                                              |                                                                                                                                                                                                                                                                      |                                                                  | Total mortality (n=193)<br>ER positive | Per 1 kg/m <sup>2</sup>           | 1.05 ( 1.03 - 1.08 )                   | Unadjusted                                 |
|                                                                                                                                                |                                                                                                        |                                                                              |                                                                                                                                                                                                                                                                      |                                                                  | Total mortality (n=120)<br>ER negative | ≥28.5 vs ≤ 22.7 kg/m <sup>2</sup> | 0.94 ( 0.56 - 1.58 ) P trend=0.85      | Unadjusted                                 |

|                                                                                                                                                                                                                                                                                                                     |                                                                                                                                                                                                                        |                                                                                                                             |                                                                                                                                                                                                                                                                                                                                                             |                                                                                                                                            |                                           |                               |                                 |                                                                                                                                                                                           |
|---------------------------------------------------------------------------------------------------------------------------------------------------------------------------------------------------------------------------------------------------------------------------------------------------------------------|------------------------------------------------------------------------------------------------------------------------------------------------------------------------------------------------------------------------|-----------------------------------------------------------------------------------------------------------------------------|-------------------------------------------------------------------------------------------------------------------------------------------------------------------------------------------------------------------------------------------------------------------------------------------------------------------------------------------------------------|--------------------------------------------------------------------------------------------------------------------------------------------|-------------------------------------------|-------------------------------|---------------------------------|-------------------------------------------------------------------------------------------------------------------------------------------------------------------------------------------|
|                                                                                                                                                                                                                                                                                                                     |                                                                                                                                                                                                                        |                                                                                                                             |                                                                                                                                                                                                                                                                                                                                                             |                                                                                                                                            | Total mortality<br>(n=120)<br>ER negative | Per 1 kg/m <sup>2</sup>       | 0.99 ( 0.96 - 1.03 )            | Unadjusted                                                                                                                                                                                |
| Caan BJ, 2008 <sup>51</sup> ,<br>Life After Cancer<br>Epidemiology<br>(LACE), United<br>States,<br><br>BMI – Excluded<br>(all-cause<br>mortality)<br>(superseded by<br>Nelson, 2016)<br><br>Included,<br>subgroup meta-<br>analysis (breast<br>cancer mortality)<br><br>Included, meta-<br>analysis<br>(recurrence) | Prospective<br>cohort study of<br>cancer survivors<br>(n= 1692)<br><br>Pre- and<br>postmenopausal<br>Mean age:58.3<br>years<br><br>Entered study on<br>average 1.9 years<br>post-diagnosis<br><br>Response rate<br>46% | 1997-2000<br><br>Follow up= 83.9<br>months<br><br>162 deaths<br><br>99 breast cancer<br>deaths (55%)<br><br>207 recurrences | Stage I-IIIa invasive<br>breast cancer<br><br>1551 ER+/PR+<br><br>348 ER-/PR-<br><br>343 others HR status<br><br>793 node+<br><br>1363 node- cases<br><br>423 patients<br>chemotherapy only 552<br>patients radiotherapy<br><br>855 patients chemo-<br>and radiotherapy 1610<br>patients current<br>tamoxifen use<br><br>153 patients past<br>tamoxifen use | Self-reported pre-<br>diagnosis weight<br>and weight at<br>study entry and<br>height, 11-39<br>(average 22.7)<br>months after<br>diagnosis | Death from any<br>cause(n=160)            | ≥30 vs <25kg/m <sup>2</sup>   | 1.3 (0.8 - 1.9)<br>P trend=0.22 | Age at diagnosis,<br>tumour stage,<br>tamoxifen use,<br>treatment, nodal<br>status, oestrogen<br>receptor level,<br>progesterone receptor<br>level, smoking, non-<br>sedentary activities |
|                                                                                                                                                                                                                                                                                                                     |                                                                                                                                                                                                                        |                                                                                                                             |                                                                                                                                                                                                                                                                                                                                                             |                                                                                                                                            | Breast cancer<br>death (n=90)             | ≥30 vs <25kg/m <sup>2</sup>   | 1.2 (0.7-2.1)<br>P trend=0.53   |                                                                                                                                                                                           |
|                                                                                                                                                                                                                                                                                                                     |                                                                                                                                                                                                                        |                                                                                                                             |                                                                                                                                                                                                                                                                                                                                                             |                                                                                                                                            | Breast cancer<br>recurrence<br>(n=207)    | ≥30 vs <25kg/m <sup>2</sup>   | 1.0 (0.7-1.4)<br>P trend=0.83   |                                                                                                                                                                                           |
| Dawood, 2008 <sup>61</sup> ,<br>MD Anderson<br>Cancer Center<br>(MDACC), Texas<br>Review Study,<br>United States<br><br>BMI – Included,<br>subgroup meta-<br>analysis                                                                                                                                               | Retrospective<br>cohort study<br>Pre and post-<br>menopausal                                                                                                                                                           |                                                                                                                             | Invasive breast cancer                                                                                                                                                                                                                                                                                                                                      | From records<br>At diagnosis                                                                                                               | Total mortality                           | ≥30 vs <25 kg/m <sup>2</sup>  | 1.40 (1.03-1.91)                |                                                                                                                                                                                           |
|                                                                                                                                                                                                                                                                                                                     |                                                                                                                                                                                                                        |                                                                                                                             |                                                                                                                                                                                                                                                                                                                                                             |                                                                                                                                            | Recurrence-free<br>survival               | ≥30 vs <25 kg/m <sup>2</sup>  | 1.42 (1.05-1.92)                |                                                                                                                                                                                           |
| Labidi SI, 2008 <sup>85</sup> ,<br>Salah Azaiz<br>Institute Tunisia                                                                                                                                                                                                                                                 | Retrospective<br>study (n= 100 )<br>Pre and<br>postmenopausal                                                                                                                                                          | Treatment 1994-<br>2000 Follow up=<br>6 years<br><br>70 deaths                                                              | Nonmetastatic<br>inflammatory breast<br>cancer,                                                                                                                                                                                                                                                                                                             | From records,<br>before treatment                                                                                                          | 3-year survival<br>(n=70)                 | ≥30 vs <25 kg/ m <sup>2</sup> | 1.032 (0.511 - 2.084)           | Chemotherapy,<br>hormonal therapy                                                                                                                                                         |

|                                                                                                     |                                                                           |                                               |                                                                                                                                                                                                                                                                                                                                                                       |                                                                  |                                            |                                |                         |  |
|-----------------------------------------------------------------------------------------------------|---------------------------------------------------------------------------|-----------------------------------------------|-----------------------------------------------------------------------------------------------------------------------------------------------------------------------------------------------------------------------------------------------------------------------------------------------------------------------------------------------------------------------|------------------------------------------------------------------|--------------------------------------------|--------------------------------|-------------------------|--|
| Review Study, Tunisia                                                                               | age range: 23-71 years, mean age: 44 years                                |                                               | 40% ER-, 17 %ER +, 43% unknown, 27% PR-, 12 %PR+, 61% unknown<br><br>tumor size <= 5cm 30% , size >5 cm 46%, 24% unknown,<br><br>Scarf and Bloom grade1: 4%, grade 2 39%, grade 3 37%, 20% unknown<br><br>99% neo-adjuvant chemotherapy, 93% mastectomy, 83% radiotherapy, 84% adjuvant chemotherapy, 60% hormone therapy                                             |                                                                  |                                            |                                |                         |  |
| BMI – Included, meta-analysis                                                                       |                                                                           |                                               |                                                                                                                                                                                                                                                                                                                                                                       |                                                                  |                                            |                                |                         |  |
| Litton, 2008 <sup>183</sup> , MD Anderson Cancer Center (MDACC), Texas Review Study, United States, | Retrospective cohort study (n= 1169 ) Pre- and postmenopausal mean age:50 | Diagnosis year: 1990-2004 Follow up= 14 years | All invasive breast cancer<br>60.1% ER+, 39.9% ER-; 51.2% PR+, 48.8% PR-; 22.8% HER-2+, 77.2% HER-2- Cancer stages: 4.1% I, 63% II, 32.9% III; Tumor stages: 0.2% T0, 11.5% T1, 56.5% T2, 17.7% T3; 14.1% T4; Histology: 92.9% ductal, 7.1% lobular Mastectomy: 61% yes; Breast-conserving surgery: 38% yes; No surgery: 1% yes; Anthracycline-based regimen: 91% yes | From records before surgery at start of neoadjuvant chemotherapy | Overall survival(n=194)                    | ≥30 vs <24.9 kg/m <sup>2</sup> | 1.65 ( 1.18 - 2.3 )     |  |
| BMI – Included, review (recurrence)                                                                 |                                                                           |                                               |                                                                                                                                                                                                                                                                                                                                                                       |                                                                  |                                            |                                |                         |  |
|                                                                                                     |                                                                           |                                               |                                                                                                                                                                                                                                                                                                                                                                       |                                                                  | 10y breast cancer-specific survival(n=167) | ≥30 vs <24.9 kg/m <sup>2</sup> | P log-rank test = 0.048 |  |

|                                                                                                                                                                                                                                                              |                                                                                         |                                                                                                                                           |                                                                                                                                                                                                                                                                                                                                                                                               |                       |                            |                                |                                       |                                                                                                                                                                                                                                  |
|--------------------------------------------------------------------------------------------------------------------------------------------------------------------------------------------------------------------------------------------------------------|-----------------------------------------------------------------------------------------|-------------------------------------------------------------------------------------------------------------------------------------------|-----------------------------------------------------------------------------------------------------------------------------------------------------------------------------------------------------------------------------------------------------------------------------------------------------------------------------------------------------------------------------------------------|-----------------------|----------------------------|--------------------------------|---------------------------------------|----------------------------------------------------------------------------------------------------------------------------------------------------------------------------------------------------------------------------------|
|                                                                                                                                                                                                                                                              |                                                                                         |                                                                                                                                           |                                                                                                                                                                                                                                                                                                                                                                                               |                       | Disease-free survival      | ≥30 vs <24.9 kg/m <sup>2</sup> | 0.98 ( 0.7 - 1.37 )                   | Race, Age, menopausal status, chemotherapy, Receptor status, Nodal status, Pathological complete response, Time from chemo to surgery, Nuclear grade                                                                             |
| Majed B, 2008 <sup>89</sup> , Curie Institute Breast Cancer Group (CIBCG), France<br><br>BMI – Included, meta-analysis (all-cause mortality, recurrence)<br><br>Excluded (breast cancer mortality, deaths from second cancers, second primary breast cancer) | Prospective cohort study of cancer survivors (n= 14709 )<br><br>Pre- and postmenopausal | 1981-1999 Follow up= 8 years<br><br>3693 deaths, including 80.5% breast cancer deaths, 5.2% due to second cancers, 4.5% from other causes | Non-metastatic invasive breast cancer<br><br>Stage I 36.2%, II 51.1%, III 12.6%<br><br>ER+ 50.9%<br><br>ER- 17.4%<br><br>Unknown 31.7%<br><br>PR+ 50.2%<br><br>PR- 24.2%<br><br>Unknown 25.6%<br><br>Conservative surgery: 57.2%<br><br>Non-conservative surgery: 29%<br><br>Non surgical local treatment: 13.8%<br>Hormonal therapy: 33.1%<br><br>Chemotherapy: 30.8%<br>Radiotherapy: 86.6% | Measured at diagnosis | Overall survival(n=3693)   | ≥30 vs <25 kg/m <sup>2</sup>   | 1.15 (1.02 - 1.29)<br>P trend= <0.05  | Age, tumour dimension, clinical node development, menopausal status, year of diagnosis, tumour oestrogen, progesterone receptor level, clinical tumour extension, number of axillary invaded nodes, Scarf-Bloom-Richardson grade |
|                                                                                                                                                                                                                                                              |                                                                                         |                                                                                                                                           |                                                                                                                                                                                                                                                                                                                                                                                               |                       | Overall survival(n=3693)   | Per 1 kg/m <sup>2</sup>        | 1.010 (1.002 - 1.019)                 |                                                                                                                                                                                                                                  |
|                                                                                                                                                                                                                                                              |                                                                                         |                                                                                                                                           |                                                                                                                                                                                                                                                                                                                                                                                               |                       | Breast cancer mortality    | ≥30 vs <25 kg/m <sup>2</sup>   | 1.35 (1.19 - 1.54)<br>P trend=<0.0001 | Unadjusted                                                                                                                                                                                                                       |
|                                                                                                                                                                                                                                                              |                                                                                         |                                                                                                                                           |                                                                                                                                                                                                                                                                                                                                                                                               |                       | Deaths from second cancers | ≥30 vs <25 kg/m <sup>2</sup>   | 2.14 (1.38 - 3.31)<br>P trend=< 0.001 | Unadjusted                                                                                                                                                                                                                       |

|                                      |                                                              |                                                                          |                                                                                          |                                              |                                                      |                               |                                     |                        |
|--------------------------------------|--------------------------------------------------------------|--------------------------------------------------------------------------|------------------------------------------------------------------------------------------|----------------------------------------------|------------------------------------------------------|-------------------------------|-------------------------------------|------------------------|
|                                      |                                                              |                                                                          |                                                                                          |                                              | Disease-free survival (n=4876)                       | ≥30 vs <25 kg/m <sup>2</sup>  | 1.12 (1.01 - 1.25)<br>P trend=<0.05 | Above factors          |
|                                      |                                                              |                                                                          |                                                                                          |                                              | Disease-free survival (n=4876)                       | Per 1 kg/m <sup>2</sup>       | 1.008 (1.001 - 1.015)               |                        |
|                                      |                                                              |                                                                          |                                                                                          |                                              | Locoregional recurrence(n=2069)                      | ≥30 vs <25 kg/m <sup>2</sup>  | 0.98 (0.82 - 1.16)<br>P trend=0.78  | Unadjusted             |
|                                      |                                                              |                                                                          |                                                                                          |                                              | Node recurrence(n=323)                               | ≥30 vs <25 kg/m <sup>2</sup>  | 1.03 (0.68 - 1.57)<br>P trend=0.88  | Unadjusted             |
|                                      |                                                              |                                                                          |                                                                                          |                                              | Distant metastases(n=3780)                           | ≥30 vs <25 kg/m <sup>2</sup>  | 1.17 (1.04 - 1.31)<br>P trend=<0.01 | Above factors          |
|                                      |                                                              |                                                                          |                                                                                          |                                              |                                                      | Per 1 kg/m <sup>2</sup>       | 1.013 (1.005 - 1.021)               |                        |
|                                      |                                                              |                                                                          |                                                                                          |                                              | Second cancer(n=555)                                 | ≥30 vs <25 kg/m <sup>2</sup>  | 1.46 (1.10 - 1.94)<br>P trend=<0.05 | Age, menopausal status |
|                                      |                                                              |                                                                          |                                                                                          |                                              | Second cancer postmenopausal                         | ≥30 vs <25 kg/m <sup>2</sup>  | 1.41 (1.02-1.94)<br>P trend=<0.05   |                        |
|                                      |                                                              |                                                                          |                                                                                          |                                              | Second cancer(n=555)                                 | Per 1 kg/m <sup>2</sup>       | 1.021 (1.001 - 1.042)               |                        |
| (Results superseded by Majed, 2009)  |                                                              |                                                                          |                                                                                          |                                              | Contralateral Breast Cancer(n=1009)                  | ≥30 vs <25 kg/m <sup>2</sup>  | 1.17 (0.93 - 1.48)<br>P trend=0.23  | Unadjusted             |
|                                      |                                                              |                                                                          |                                                                                          |                                              | Any cancer(n=555)                                    | ≥30 vs <25 kg/m <sup>2</sup>  | 1.46 (1.1 - 1.94)<br>P trend=<0.05  | Age, menopausal status |
|                                      |                                                              |                                                                          |                                                                                          |                                              | Any cancer(n=555)                                    | Per 1 kg/m <sup>2</sup>       | 1.021 (1.001 - 1.042)               |                        |
| Sánchez, 2008 <sup>198</sup> , Spain | Nested case-control study (n=682)<br>Pre- and postmenopausal | Diagnosed: 1975-2003 Follow-up= 89.17 months, 217 second primary cancers | Stage: 35.6% local, 41.9% regional, 4.7% advanced, 17.7% unknown<br>54.5% ER+, 45.5% ER- | From medical records or measured at baseline | Any cancer (n=270)<br>Second primary cancers (n=217) | ≥30 vs < 30 kg/m <sup>2</sup> | 7.48 (1.25-44.88)<br>P< 0.05        | Multivariate adjusted  |

|                                                                                                                                         |                                                                                                                                                         |                                                                                          |                                                                                                                                                                                                                                                                                                                                                                                         |                                    |                                          |                              |                                      |                  |
|-----------------------------------------------------------------------------------------------------------------------------------------|---------------------------------------------------------------------------------------------------------------------------------------------------------|------------------------------------------------------------------------------------------|-----------------------------------------------------------------------------------------------------------------------------------------------------------------------------------------------------------------------------------------------------------------------------------------------------------------------------------------------------------------------------------------|------------------------------------|------------------------------------------|------------------------------|--------------------------------------|------------------|
|                                                                                                                                         | Mean age: 56 years                                                                                                                                      |                                                                                          | 31.1% PR+,<br>58.9% PR-<br>96.2% surgery<br>28.2% chemotherapy<br>61.4% radiotherapy<br>32.3% hormone therapy                                                                                                                                                                                                                                                                           |                                    |                                          |                              |                                      |                  |
| Vitolins MZ, 2008 <sup>348</sup> , Phase II Doxorubicin-Based Drug Trial for Node-Positive Breast Cancer, United States, BMI - Excluded | Secondary analysis of clinical trial (n= 636 ) Pre- and postmenopausal age range: 25-73 years mean age: 52 years Recruited between 1980-1985 until 1999 | Follow up= 13.7 years, 341 deaths, 303 breast cancer deaths, 38 deaths from other causes | Stages II-III, lymph-node positive breast cancer 62% ER+, 38% ER-, 49% PR+, 51% PR-, Participants of doxorubicin-based multidrug regimen as adjuvant therapy trial; had mastectomy                                                                                                                                                                                                      | Measured prior to adjuvant therapy | Overall survival (n=341)                 | Per 1 kg/m <sup>2</sup>      | 1.04 ( - )                           | Unadjusted       |
|                                                                                                                                         |                                                                                                                                                         |                                                                                          |                                                                                                                                                                                                                                                                                                                                                                                         |                                    | Breast cancer-specific mortality (n=303) | Per 1 kg/m <sup>2</sup>      | 1.04 ( - )                           | Unadjusted       |
|                                                                                                                                         |                                                                                                                                                         |                                                                                          |                                                                                                                                                                                                                                                                                                                                                                                         |                                    | Breast cancer recurrence (n=345)         | Per 1 kg/m <sup>2</sup>      | 1.03 ( 1.01 - 1.05 )                 | Unadjusted       |
| Brewster, 2007 <sup>274</sup> , Early Stage Breast Cancer Repository (ESBCR) Study, BMI - Excluded                                      | Retrospective cohort study (n= 2327 ) Mean age:55 calendar year:1985-2000 Loss to follow up : 6%                                                        | Follow up= 5 years                                                                       | Early stage breast cancer Tumor size: ≤2 (n=1603)/ >2 (n=57) Node negative: n=1558 Node Positive: n=765 Missing: n=4 ER+/PR+ n=1099 ER+/PR- Or ER-/PR+ n=424 ER-/PR- n=436 Missing n=368 Surgery: Modified mastectomy n=1367/Segmental mastectomy: n=952/ Missing: n=8 Chemotherapy: Anthracycline 643/Anthracycline and taxane: n=335/Other: n=52/No chemo n=1263 Endocrine treatment: | Medical records,                   | (n=332)                                  | Obese vs Under/normal weight | 0.86 ( 0.65 - 1.12 )<br>P trend=0.27 | Treatment, stage |

|                                                                                                                |                                                                                                       |                                                                                                                                                                                              |                                                                                                                                                                                                                                        |                                                                      |                                         |                                    |                         |                                                                            |
|----------------------------------------------------------------------------------------------------------------|-------------------------------------------------------------------------------------------------------|----------------------------------------------------------------------------------------------------------------------------------------------------------------------------------------------|----------------------------------------------------------------------------------------------------------------------------------------------------------------------------------------------------------------------------------------|----------------------------------------------------------------------|-----------------------------------------|------------------------------------|-------------------------|----------------------------------------------------------------------------|
|                                                                                                                |                                                                                                       |                                                                                                                                                                                              | Yes n=1005/No n=1305/missing n=17<br>Radiation: Yes n=1017<br>No n=1295 Missing n=15                                                                                                                                                   |                                                                      |                                         |                                    |                         |                                                                            |
| Demirkan, 2007 <sup>284</sup> , Turkish Adjuvant Systemic Treatments Follow-up Study, Turkey<br>BMI - Excluded | Retrospective cohort study (n= 266 ) Pre- and postmenopausal mean age:52 calendar year:2000-2004      | Follow up= 60 months                                                                                                                                                                         | Invasive breast cancer                                                                                                                                                                                                                 | Measured Post-surgery/treatment; at admission for adjuvant treatment | Distant disease free pre-menopausal     | ≥30 vs 18.5-29.9 kg/m <sup>2</sup> | P log-rank test = 0.056 | Unadjusted                                                                 |
|                                                                                                                |                                                                                                       |                                                                                                                                                                                              |                                                                                                                                                                                                                                        |                                                                      | Distant disease free post-menopausal    | ≥30 vs 18.5-29.9 kg/m <sup>2</sup> | P log-rank test = 0.026 | Unadjusted                                                                 |
| Pierce J, 2007 <sup>320</sup> , Women's Healthy Eating and Living (WHEL), United States<br>BMI - Excluded      | Secondary analysis of dietary intervention trial (n= 1490) Pre- and postmenopausal Mean age: 50 years | 1991-2000 Follow up= 6.7 years<br>135 deaths, 118 breast cancer deaths, 10 deaths from other cancers, 7 deaths from non-cancer, 236 breast cancer events<br><br>7 patients lost to follow-up | Early stage breast cancer<br>AJCC Stage I 40% Stage II 45% stage III 15%<br>ER+/PR+ 63.1% ER+/PR- 10.8%<br>ER-/PR+ 5.1%<br>ER-/PR- 20.8%<br>No chemotherapy 31.4% Nonanthracycline 25.7% Anthracycline 42.8%<br>Adjuvant tamoxifen 42% | Measured about 2 years after diagnosis                               | Overall survival(n=135)                 | ≥30 vs 20 kg/ m <sup>2</sup>       | 1.42 ( 0.87 - 2.31 )    | Age, alcohol intake, receptor status, time from diagnosis to randomization |
| Schuetz, 2007 <sup>330</sup> , University Hospital of Heidelberg, Germany<br>BMI - Excluded                    | Retrospective cohort study (n= 1072 ) Pre- and postmenopausal mean age:54                             | Breast surgery: 1990 -1999 Follow up= 73.2 months<br>163 deaths                                                                                                                              | Invasive:1072 67.2% ER +ve, 59.4% PR +ve<br>Primary breast cancer, grades: 12.3% 1, 52.5% 2, 27.9% 3<br>Breast conserving surgery: 74.6% yes; Primary chemotherapy: 9.8% yes; Adjuvant radiation therapy: 80.5% yes; Adjuvant systemic | From records                                                         | Overall survival(n=124) post-menopausal | Per 1 kg/m <sup>2</sup>            | 1.01 ( 0.96 - 1.05 )    | Unadjusted                                                                 |



|                                                                                                                                                                            |                                                                                                                                                                                                                                                                        |                                                                                                                                  |                                                                                                                                                                                                                                                                          |                                                                                                                                                                         |                                                                                     |                                       |                                           |                                                                                                                                                                                                       |
|----------------------------------------------------------------------------------------------------------------------------------------------------------------------------|------------------------------------------------------------------------------------------------------------------------------------------------------------------------------------------------------------------------------------------------------------------------|----------------------------------------------------------------------------------------------------------------------------------|--------------------------------------------------------------------------------------------------------------------------------------------------------------------------------------------------------------------------------------------------------------------------|-------------------------------------------------------------------------------------------------------------------------------------------------------------------------|-------------------------------------------------------------------------------------|---------------------------------------|-------------------------------------------|-------------------------------------------------------------------------------------------------------------------------------------------------------------------------------------------------------|
|                                                                                                                                                                            |                                                                                                                                                                                                                                                                        |                                                                                                                                  | therapy 84.2% yes;<br>Endocrine therapy<br>45.5% yes;<br>Chemotherapy: 25.7%<br>yes; Endocrine and<br>chemotherapy: yes<br>13.1%                                                                                                                                         |                                                                                                                                                                         |                                                                                     |                                       |                                           |                                                                                                                                                                                                       |
| Abrahamson,<br>2006 <sup>39</sup> , Atlanta,<br>Seattle, New<br>Jersey, United<br>States<br><br>BMI – Included,<br>meta-analysis                                           | Follow-up of<br>cases in case-<br>control study (n=<br>1254 )<br><br>Pre- (78%) and<br>postmenopausal<br>(22%)<br><br>Age range: 20-54<br>years<br><br>White 75%<br><br>Non-white 25%<br><br>86% completed<br>interviews at<br>median 4.2<br>months post-<br>diagnosis | 1990-1992 Follow<br>up= 9.8 years<br><br>290 deaths,<br>including 85%<br>breast cancer<br>deaths<br><br><2% loss to<br>follow-up | Invasive breast cancer<br><br>Local 57%<br><br>Regional 40%<br><br>Distant 3%<br><br>ER+ 56%<br><br>ER- 35%<br><br>Borderline 3%<br><br>Unknown 6%                                                                                                                       | Measured at<br>interview<br>conducted<br>4.2months post-<br>diagnosis;<br>recalled weight at<br>20 years and in<br>the year before<br>diagnosis<br><br>BMI at interview | Record linkage<br>with National<br>Death index<br><br>All-cause<br>mortality(n=281) | ≥30 vs 18.5-24.9<br>kg/m <sup>2</sup> | 1.65 ( 1.23 - 2.21 )<br><br>P trend=0.001 | Tumour stage, Income<br><br>(Tested other<br>covariates, no change<br>to estimate by >10%<br>and not included in<br>final model<br><br>No confounding or<br>modifying effects of<br>treatment status) |
| Caan B, 2006 <sup>146</sup> ,<br>Women's Healthy<br>Eating and Living<br>(WHEL) and Life<br>After Cancer<br>Epidemiology<br>(LACE), United<br>States<br><br>BMI - Excluded | Pooled analysis of<br>prospective<br>studies<br>(n= 3215 )<br><br>Pre- and<br>postmenopausal<br><br>Age range: 18-70<br>years, Mean age:<br>58.8 years                                                                                                                 | 1995-2002<br><br>Follow up= 7<br>years                                                                                           | Stage I 43.7%, II 52.7%,<br>III A 3.6%<br><br>ER+ 78.2%, PR+ 69.3%<br><br>Surgery type:<br>mastectomy 50.7%,<br>conserving 49.3%<br><br>No radiation/no<br>chemotherapy 15.1%,<br>Chemotherapy only<br>22.5%, Radiation only<br>23%, Chemotherapy<br>and radiation 39.4% | Measured/self-<br>reported at study<br>entry, about 2<br>years post-<br>diagnosis                                                                                       | Recurrence                                                                          | ≥30 vs 18.5-25 kg/ m <sup>2</sup>     | 1.1 ( 0.9 - 1.4 )                         | BMI, age at diagnosis,<br>smoking, tamoxifen<br>use, treatment, tumor<br>stage, nodal status,<br>hormone receptor<br>status, menopausal<br>status, height, %weight<br>gain                            |

|                                                                                                                                                                                              |                                                                                                                              |                                                                                                                    |                                                                   |                                     |                                                   |                                      |                                      |                                        |
|----------------------------------------------------------------------------------------------------------------------------------------------------------------------------------------------|------------------------------------------------------------------------------------------------------------------------------|--------------------------------------------------------------------------------------------------------------------|-------------------------------------------------------------------|-------------------------------------|---------------------------------------------------|--------------------------------------|--------------------------------------|----------------------------------------|
|                                                                                                                                                                                              |                                                                                                                              |                                                                                                                    | Tamoxifen use at diagnosis: never 28.5%, past 6.6%, current 64.9% |                                     |                                                   |                                      |                                      |                                        |
| Dignam, 2006 <sup>64</sup> , National Surgical Adjuvant Breast and Bowel Project (NSABP) B-13, B-19, B-23, United States<br><br>BMI – Included, meta-analysis (second primary breast cancer) | Secondary analysis of clinical trial (n= 4077 )<br><br>Pre- (54.5%) and postmenopausal (45.5%)<br><br>White 81.7%, Black 12% | 1981-1988<br><br>Max follow-up: 24 years<br><br>820 deaths<br><br>624 breast cancer deaths<br><br>196 other deaths | ER-, node- invasive breast cancer                                 | At trial enrolment, no further info | Total mortality (n=820)                           | ≥35 vs <25 kg/m <sup>2</sup>         | 1.30 (1.03-1.63)                     | Age, treatment, tumour size, ethnicity |
|                                                                                                                                                                                              |                                                                                                                              |                                                                                                                    |                                                                   |                                     | Deaths following breast cancer events (n=624)     | ≥35 vs <25 kg/m <sup>2</sup>         | 1.13 (0.85-1.49)                     |                                        |
|                                                                                                                                                                                              |                                                                                                                              |                                                                                                                    |                                                                   |                                     | Other deaths (n=196)                              | ≥35 vs <25 kg/m <sup>2</sup>         | 1.86 (1.21-2.84)                     |                                        |
|                                                                                                                                                                                              |                                                                                                                              |                                                                                                                    |                                                                   |                                     | Disease-free survival (n=1326)                    | ≥35 vs <25 kg/m <sup>2</sup>         | 1.21 (1.00-1.46)                     |                                        |
|                                                                                                                                                                                              |                                                                                                                              |                                                                                                                    |                                                                   |                                     | Breast cancer recurrence (n=772)                  | ≥35 vs <25 kg/m <sup>2</sup>         | 1.04 (0.80-1.35)                     |                                        |
|                                                                                                                                                                                              |                                                                                                                              |                                                                                                                    |                                                                   |                                     | Second cancer (n=439)                             | ≥35 vs <25 kg/m <sup>2</sup>         | 1.32 (0.96-1.81)                     |                                        |
|                                                                                                                                                                                              |                                                                                                                              |                                                                                                                    |                                                                   |                                     | Contralateral Breast Cancer(n=156) pre-menopausal | obese II vs normal Kg/m <sup>2</sup> | 0.98 ( 0.54 - 1.74 )<br>P trend=0.76 |                                        |
|                                                                                                                                                                                              |                                                                                                                              |                                                                                                                    |                                                                   |                                     | Contralateral Breast Cancer(n=86) post-menopausal | obese II vs normal Kg/m <sup>2</sup> | 2.13 ( 1.06 - 4.28 )<br>P trend=0.02 |                                        |

|                                                                                                                                                                                                           |                                                                                                                                                    |                                                                                             |                                                                                                                                                                                                                                                                                  |                                                         |                                                                                         |                                             |                                              |                                                                                                                                                                       |
|-----------------------------------------------------------------------------------------------------------------------------------------------------------------------------------------------------------|----------------------------------------------------------------------------------------------------------------------------------------------------|---------------------------------------------------------------------------------------------|----------------------------------------------------------------------------------------------------------------------------------------------------------------------------------------------------------------------------------------------------------------------------------|---------------------------------------------------------|-----------------------------------------------------------------------------------------|---------------------------------------------|----------------------------------------------|-----------------------------------------------------------------------------------------------------------------------------------------------------------------------|
| <p>Tao MH, 2006<sup>112</sup>, Shanghai Breast Cancer Study (SBCS), China</p> <p>BMI – Included, meta-analysis</p>                                                                                        | <p>Follow-up of cases in case-control study (n=1455 )</p> <p>Pre- and postmenopausal</p> <p>Age range: 25-64 years</p> <p>Response rate: 91.1%</p> | <p>1996-1998 Follow up= 5.1 years</p> <p>240 deaths, including 218 breast cancer deaths</p> | <p>Stage 0-I 24.6%</p> <p>IIA 34.9%</p> <p>IIB 21.9%</p> <p>III-IV 11.3%</p> <p>Unknown 7.1%</p> <p>ER+ 44%</p> <p>ER- 25.5%</p> <p>Unknown 30.0%</p>                                                                                                                            | <p>Measured at or soon after diagnosis at interview</p> | <p>Self-reported, record linkage with death registry</p> <p>Overall survival(n=240)</p> | <p>≥25.53 vs &lt;21.23 kg/m<sup>2</sup></p> | <p>1.4 ( 1.0 – 2.0 )</p> <p>P trend=0.07</p> | <p>Age at diagnosis, education, menopausal status, Tumour stage, chemotherapy, Tamoxifen use, radiotherapy, oestrogen receptor level, progesterone receptor level</p> |
|                                                                                                                                                                                                           |                                                                                                                                                    |                                                                                             | <p>PR+ 43.5%</p> <p>PR- 25.2%</p> <p>Unknown 31.1%</p> <p>Surgery: 99%</p> <p>Chemotherapy: 94%</p> <p>Chemotherapy and traditional Chinese medicine: 63%</p> <p>Radiotherapy: 38.9%</p> <p>Tamoxifen: 63.2%</p>                                                                 |                                                         | <p>Disease-free survival(n=298)</p>                                                     | <p>≥25.53 vs &lt;21.23 kg/m<sup>2</sup></p> | <p>1.3 ( 1.0 - 1.8 )</p> <p>P trend=0.08</p> |                                                                                                                                                                       |
| <p>Gonzalez-Angulo, 2005<sup>165</sup>, MD Anderson Cancer Center, Texas Review Study, United States,</p> <p>BMI – Included, meta-analysis (all-cause mortality)</p> <p>Included, review (recurrence)</p> | <p>Retrospective cohort study (n=452 )</p> <p>Postmenopausal due to surgery</p> <p>Mean age:&lt;=35 years</p>                                      | <p>1990-2002 Follow up= range 3 years</p>                                                   | <p>In situ 14 cases Invasive 389 cases</p> <p>AJCC Stage II-III 63%</p> <p>ER+ 52.3%</p> <p>ER- 47.7%</p> <p>PR+ 47.5%</p> <p>PR- 52.4%</p> <p>Mastectomy 75.4%</p> <p>Node dissection 75%</p> <p>All received anthracycline-based chemotherapy</p> <p>Additional taxane 35%</p> | <p>From records at diagnosis</p>                        | <p>Overall survival(n=82)</p>                                                           | <p>≥30 vs &lt;30 kg/m<sup>2</sup></p>       | <p>1.42 ( 0.99 - 2.04 )</p>                  | <p>Adjustment unclear</p>                                                                                                                                             |

|                                                                                              |                                                                                |                                                                                                                                                 |                                                                                                                                                                                                                        |                                                       |                                                |                                                |                      |                                                                                                            |
|----------------------------------------------------------------------------------------------|--------------------------------------------------------------------------------|-------------------------------------------------------------------------------------------------------------------------------------------------|------------------------------------------------------------------------------------------------------------------------------------------------------------------------------------------------------------------------|-------------------------------------------------------|------------------------------------------------|------------------------------------------------|----------------------|------------------------------------------------------------------------------------------------------------|
|                                                                                              |                                                                                |                                                                                                                                                 |                                                                                                                                                                                                                        |                                                       | Recurrence-free(n=171)                         | ≥30 vs <30 kg/m <sup>2</sup>                   | 1.02 ( 0.59 - 1.77 ) | Adjustment unclear                                                                                         |
| Loi, 2005 <sup>185</sup> , Australia<br><br>BMI – Included, review                           | Follow-up of case from a control study (n = 1101)<br>Age range: 23-69 years    | From 1992<br>Follow-up: 5 years                                                                                                                 | Non-metastatic breast cancer<br>ER+ 671 cases<br>ER- 379 cases<br>PR+ 715 cases<br>PR- 334 cases<br>Chemotherapy 688 cases<br>Tamoxifen 369 cases<br>No treatment 233 cases                                            | BMI self-reported on average 8 months after diagnosis | All-cause mortality (n = 184)                  | ≥30 vs <30 kg/m <sup>2</sup>                   | 1.56 (1.01 - 2.40)   | Age, tumor grade, nodal status, progesterone receptor level                                                |
|                                                                                              |                                                                                |                                                                                                                                                 |                                                                                                                                                                                                                        |                                                       |                                                | ≥30 vs <30 kg/m <sup>2</sup><br>Premenopausal  | 1.71 (1.05 - 2.77)   |                                                                                                            |
|                                                                                              |                                                                                |                                                                                                                                                 |                                                                                                                                                                                                                        |                                                       |                                                | ≥30 vs <30 kg/m <sup>2</sup><br>Postmenopausal | 0.84 (0.28 - 2.56)   |                                                                                                            |
| Tammemagi, 2005 <sup>342</sup> , United States<br><br>BMI - Excluded                         | Retrospective cohort study (n= 906 )<br>Pre and Post-menopausal                | 1985-1990<br>Follow up= 10 years<br>476 deaths: 179 (37.6%) breast cancer deaths, 297 (62.4%) other deaths<br><br>20 patients lost to follow up | In situ 30 (3.6%)<br>Invasive 805 cases<br>Stage I 34.3%<br>Stage II 45.4%<br>Stage III 10.9%<br>Stage IV 5.9%<br>Surgery 90.8%<br>Chemotherapy 27.2%<br>Radiotherapy 28.5%<br>Hormone therapy 4.4%<br>Tamoxifen 38.5% | Pre, at, post-diagnosis BMI, from medical records     | Non-breast-cancer-related death(n=297)         | ≥35 vs 18.5-24.9 kg/m <sup>2</sup>             | 1.35 ( 0.91 - 2.00)  | Unadjusted                                                                                                 |
| Berclaz, 2004 <sup>45</sup> , International Breast Cancer Study Group (IBCSG), multinational | Secondary analysis of clinical trial (n= 6370 )<br><br>Pre- and postmenopausal | 1978-1993<br>Follow up= 14 years                                                                                                                | Invasive breast cancer<br>3655 cases ER+<br>1798 cases ER-<br>3030 cases PR+<br>2143 cases PR-                                                                                                                         | From records, prior to treatment                      | All-cause mortality (10-year estimate n= 2627) | ≥30 vs <25 kg/m <sup>2</sup>                   | 1.14 (1.03-1.27)     | ER status, menopausal status, nodal status, tumour size, treatment, chemotherapy, hormone and chemotherapy |

|                               |                        |  |                                                                                                                                                                                                                                 |  |                                                              |                              |                  |  |
|-------------------------------|------------------------|--|---------------------------------------------------------------------------------------------------------------------------------------------------------------------------------------------------------------------------------|--|--------------------------------------------------------------|------------------------------|------------------|--|
| BMI – Included, meta-analysis | Age range: 21-84 years |  | 5098 cases node+ 1272 cases node- 3702 chemotherapy 2019 hormone therapy with or without chemotherapy<br>649 patients no therapy<br>96% of obese patients received dosage that was calculated based on ideal surface area (ISA) |  |                                                              |                              |                  |  |
|                               |                        |  |                                                                                                                                                                                                                                 |  | All-cause mortality<br>Observation (no adjuvant treatment)   | ≥30 vs <25 kg/m <sup>2</sup> | 0.93 (0.68-1.29) |  |
|                               |                        |  |                                                                                                                                                                                                                                 |  | All-cause mortality<br>Hormone ± chemotherapy                | ≥30 vs <25 kg/m <sup>2</sup> | 1.10 (0.93-1.29) |  |
|                               |                        |  |                                                                                                                                                                                                                                 |  | All-cause mortality<br>Chemotherapy alone                    | ≥30 vs <25 kg/m <sup>2</sup> | 1.24 (1.08-1.43) |  |
|                               |                        |  |                                                                                                                                                                                                                                 |  | Disease-free survival (10-year estimate n= 3555)             | ≥30 vs <25 kg/m <sup>2</sup> | 1.10 (1.10-1.20) |  |
|                               |                        |  |                                                                                                                                                                                                                                 |  | Disease-free survival<br>Observation (no adjuvant treatment) | ≥30 vs <25 kg/m <sup>2</sup> | 0.90 (0.68-1.20) |  |

|                                                                                                                                                         |                                                                                                                                                         |                                                                                                                                                                 |                                                                                                    |                                 |                                               |                                    |                      |                                                                                                                  |
|---------------------------------------------------------------------------------------------------------------------------------------------------------|---------------------------------------------------------------------------------------------------------------------------------------------------------|-----------------------------------------------------------------------------------------------------------------------------------------------------------------|----------------------------------------------------------------------------------------------------|---------------------------------|-----------------------------------------------|------------------------------------|----------------------|------------------------------------------------------------------------------------------------------------------|
|                                                                                                                                                         |                                                                                                                                                         |                                                                                                                                                                 |                                                                                                    |                                 | Disease-free survival Hormone ± chemotherapy  | ≥30 vs <25 kg/m <sup>2</sup>       | 1.04 (0.89-1.21)     |                                                                                                                  |
|                                                                                                                                                         |                                                                                                                                                         |                                                                                                                                                                 |                                                                                                    |                                 | Disease-free survival Chemotherapy alone      | ≥30 vs <25 kg/m <sup>2</sup>       | 1.23 (1.08-1.39)     |                                                                                                                  |
| Carmichael, 2004 <sup>48</sup> , United Kingdom                                                                                                         | Prospective cohort study (n= 1579 )<br>Pre- and postmenopausal                                                                                          | Treatment 1963-1999 Follow up= 6 years                                                                                                                          | Tumor grades: I 23%, II 34.5%, III 18.8%, <3.4 23.8%                                               | Self-reported at diagnosis      | Overall survival                              | <30 vs ≥30 kg/m <sup>2</sup>       | 0.81 ( 0.62 - 1.06 ) | Unadjusted                                                                                                       |
| BMI – Included, review (mortality)<br>Excluded (recurrence)                                                                                             |                                                                                                                                                         |                                                                                                                                                                 |                                                                                                    |                                 | Disease-free survival                         | <30 vs ≥30 kg/m <sup>2</sup>       | 0.8 ( 0.63 - 1.01 )  | Unadjusted                                                                                                       |
| Dignam J, 2003 <sup>63</sup> , National Surgical Adjuvant Breast and Bowel Project (NSABP) B-14, United States                                          | Secondary analysis of clinical trial (n= 3385 ) (2355 from trial, 1030 from registration arm)<br>Pre- (30.6%) and postmenopausal (69.4%)<br>White 91.1% | 1982-1988 Follow up= 166 months<br>983 deaths<br>595 breast cancer deaths 388 other deaths<br>193 contralateral breast cancer, 232 other second primary cancers | Early stage ER+, node-invasive breast cancer<br>64.9% received tamoxifen<br>35.1% received placebo | From records at trial enrolment | Total mortality(n=983)                        | ≥30 vs 18.5-24.9 kg/m <sup>2</sup> | 1.31 ( 1.12 - 1.54 ) | Age, menopausal status, ethnicity, tumour size, oestrogen receptor level, progesterone receptor level, treatment |
| BMI – Excluded (mortality, other second primary cancers)<br>Included, meta-analysis (breast cancer mortality, recurrence, second primary breast cancer) |                                                                                                                                                         |                                                                                                                                                                 |                                                                                                    |                                 | Deaths following breast cancer events (n=595) | ≥30 vs 18.5-24.9 kg/m <sup>2</sup> | 1.20 ( 0.97 - 1.49 ) |                                                                                                                  |

|                                                                                                                                          |                                                                                                     |                                                 |                                                                                                                                                |                           |                                                                                   |                                    |                      |                                  |
|------------------------------------------------------------------------------------------------------------------------------------------|-----------------------------------------------------------------------------------------------------|-------------------------------------------------|------------------------------------------------------------------------------------------------------------------------------------------------|---------------------------|-----------------------------------------------------------------------------------|------------------------------------|----------------------|----------------------------------|
|                                                                                                                                          |                                                                                                     |                                                 |                                                                                                                                                |                           | Other deaths(n=388)                                                               | ≥30 vs 18.5-24.9 kg/m <sup>2</sup> | 1.49 ( 1.15 - 1.92 ) |                                  |
|                                                                                                                                          |                                                                                                     |                                                 |                                                                                                                                                |                           | Death prior to recurrence or second primary cancer (death as first event) (n=243) | ≥30 vs 18.5-24.9 kg/m <sup>2</sup> | 1.37 ( 0.99 - 1.89 ) |                                  |
|                                                                                                                                          |                                                                                                     |                                                 |                                                                                                                                                |                           | Breast cancer recurrence(n=787 )                                                  | ≥30 vs <25 kg/m <sup>2</sup>       | 0.98 ( 0.8 - 1.18 )  |                                  |
|                                                                                                                                          |                                                                                                     |                                                 |                                                                                                                                                |                           | Contralateral Breast Cancer(n=193)                                                | ≥30 vs <25 kg/m <sup>2</sup>       | 1.58 ( 1.1 - 2.25 )  |                                  |
|                                                                                                                                          |                                                                                                     |                                                 |                                                                                                                                                |                           | Contralateral Breast Cancer pre-menopausal                                        | ≥30 vs <25 kg/m <sup>2</sup>       | 1.52 ( 0.77 - 3.03 ) |                                  |
|                                                                                                                                          |                                                                                                     |                                                 |                                                                                                                                                |                           | Contralateral Breast Cancer post-menopausal                                       | ≥30 vs <25 kg/m <sup>2</sup>       | 1.63 ( 1.07 - 2.51 ) |                                  |
|                                                                                                                                          |                                                                                                     |                                                 |                                                                                                                                                |                           | Other second primary cancers (n=232)                                              | ≥30 vs <25 kg/m <sup>2</sup>       | 1.62 ( 1.16 - 2.24 ) |                                  |
|                                                                                                                                          |                                                                                                     |                                                 |                                                                                                                                                |                           | Endometrial cancer(n=51)                                                          | ≥30 vs <25 kg/m <sup>2</sup>       | 1.45 ( 0.72 - 2.94 ) |                                  |
| Kmet, 2003 <sup>175</sup> , Washington SEER Nested Case-Control Study, United States<br><br>BMI – Excluded (other second primary cancer) | Nested case-control study within a retrospective cohort<br>Pre- and post-menopausal age range:40-84 | Diagnosis year: 1978-1992 Follow up= Until 1995 | Stages I or II: 96% of cases, 94% of controls<br>At least one + (ER+, PR+, ER+PR+) 66.1%, Both ER-/PR- 11.5%<br>Unknown 8.7%<br>Not done 13.7% | From records at diagnosis | Colorectal cancer(n=146)                                                          | ≥30 vs <30 kg/m <sup>2</sup>       | 2.2 (1.2-3.9)        | Matching factors, family history |

|                                                                                                     |                                                                                                                                         |                                                                                                                        |                                                                                                                                                                                                                                                                                                              |                                                                                 |                                  |                                                |                                    |                                                                                            |
|-----------------------------------------------------------------------------------------------------|-----------------------------------------------------------------------------------------------------------------------------------------|------------------------------------------------------------------------------------------------------------------------|--------------------------------------------------------------------------------------------------------------------------------------------------------------------------------------------------------------------------------------------------------------------------------------------------------------|---------------------------------------------------------------------------------|----------------------------------|------------------------------------------------|------------------------------------|--------------------------------------------------------------------------------------------|
| <p>Goodwin, 2002<sup>292</sup>,<br/>Canada</p> <p>BMI - Excluded</p>                                | <p>Prospective cohort study (n= 512 )<br/>Pre- and post-menopausal<br/>Mean age:50.4 years<br/>Excluded diabetes</p>                    | <p>1989-1996<br/>Follow up= 50 months<br/>45 deaths, 42 breast cancer deaths<br/><br/>8 patients lost to follow up</p> | <p>Early stage invasive breast cancer<br/>ER+ 61.3%<br/>ER- 19.1%<br/>ER equivocal 5.5%<br/>Unknown 14.1% PR+ 55.7%<br/>PR -23.2%<br/>PR equivocal 5.7%<br/>Unknown 15.4%<br/>Mastectomy 22.1%<br/>Lumpectomy 77.9%<br/>Chemotherapy only 28.7%<br/>Chemotherapy plus tamoxifen 9.0%<br/>Tamoxifen 29.5%</p> | <p>Measured between 4- and 12-weeks post operation, before adjuvant therapy</p> | <p>Total mortality(n=45)</p>     | <p>27.8-54.8 vs 21.9-24.4 kg/m<sup>2</sup></p> | <p>1.78 ( 1.25 - 2.53 )</p>        |                                                                                            |
|                                                                                                     |                                                                                                                                         |                                                                                                                        |                                                                                                                                                                                                                                                                                                              |                                                                                 | <p>Distant recurrence(n=76)</p>  | <p>27.8-54.8 vs 21.9-24.4 kg/m<sup>2</sup></p> | <p>1.72 ( 1.27 - 2.34 )</p>        |                                                                                            |
| <p>Pukkala, 2002<sup>195</sup>,<br/>Finland</p> <p>BMI – Excluded (other second primary cancer)</p> | <p>Nested case-control study, within a population-based cohort of breast cancer survivor (n= 512 )<br/><br/>Pre- and postmenopausal</p> | <p>Diagnosis year: 1980-Follow up until 1995<br/><br/>144 endometrial cancers</p>                                      | <p>Grade 1-3 breast cancer<br/>Localized 60.5%<br/>Regional 30.1%<br/>Distant breast Cancer 3.5%<br/>Unknown 5.9%<br/>ER+/PR+ 40.6%<br/>ER-/PR- 12.3% ER+/PR- or ER-/PR+ 19.3%<br/>Unknown 27.7%</p>                                                                                                         | <p>From records at diagnosis</p>                                                | <p>Endometrial cancer(n=142)</p> | <p>&gt;30 vs ≤30 kg/m<sup>2</sup></p>          | <p>2.0 (1.2 - 3.3)<br/>P =0.01</p> | <p>Tamoxifen use, progesterone receptor level, parity, radiotherapy, chemotherapy, HRT</p> |



|                                                                                      |                                                                                                                               |                                                                                              |                                                                                                                                                                                                                                                       |                                   |                                                  |                              |                      |                            |
|--------------------------------------------------------------------------------------|-------------------------------------------------------------------------------------------------------------------------------|----------------------------------------------------------------------------------------------|-------------------------------------------------------------------------------------------------------------------------------------------------------------------------------------------------------------------------------------------------------|-----------------------------------|--------------------------------------------------|------------------------------|----------------------|----------------------------|
|                                                                                      |                                                                                                                               |                                                                                              | Chemotherapy 7.6%<br>Radiotherapy 59.8%<br>Tamoxifen 29%<br>Toremifene 1.8%                                                                                                                                                                           |                                   |                                                  |                              |                      |                            |
| Fowble B, 2001 <sup>399</sup> , USA                                                  | Female, Prospective Cohort of Cancer Survivors (n=1253) mean age:55<br><br>Pre- 33%, peri-6%, postmenopausal 61% Mostly white | Diagnosed:Treatment: 1978-1994 follow Up: Median 8.9 years , Loss to Follow-up: Not reported | Unilateral invasive breast cancer. DCIS and LCIS. Stage I-II. ER+ 62%, ER- 18%, unknown 20%. PR 49%, PR- 26%, unknown 25%. Node+ 26%, node- 74%. Treated with conservative surgery and radiation. Chemotherapy 19%. Tamoxifen 19%. Both 8%. None 54%. | Medical records                   | Second primary cancers (n=98)                    | Q3 vs Q1                     | P=0.81               |                            |
| BMI - Excluded                                                                       |                                                                                                                               |                                                                                              |                                                                                                                                                                                                                                                       |                                   | Contralateral breast cancer (n=87)               |                              | P=0.98               |                            |
|                                                                                      |                                                                                                                               |                                                                                              |                                                                                                                                                                                                                                                       |                                   | Second primary cancers (n=69)                    |                              | P=0.80               |                            |
| Marret, 2001 <sup>92</sup> , Tours University Hospital Review Study, France          | Retrospective cohort study (n=605) age range: 27-85 years<br><br>Pre- and postmenopausal                                      | Recruitment:1976 -1988 Follow up= 82 months                                                  | Invasive breast cancer                                                                                                                                                                                                                                | From records                      | Breast cancer recurrence                         | Per 1 kg/m <sup>2</sup>      | 0.92 (0.85 - 0.99)   | Age                        |
| BMI – Included, meta-analysis                                                        |                                                                                                                               |                                                                                              |                                                                                                                                                                                                                                                       |                                   |                                                  |                              |                      |                            |
| Chang, 2000 <sup>150</sup> , MD Anderson Cancer Center (MDACC), Texas, United States | Prospective cohort study (n=177 ) Pre- and postmenopausal                                                                     | 1974-1993 Follow up= 100 months for women alive at last contact 101 breast cancer deaths     | Invasive Inflammatory breast cancer No distant metastasis                                                                                                                                                                                             | From medical records at diagnosis | Breast cancer-specific mortality(n=101)          | ≥30 vs <30 kg/m <sup>2</sup> | 1.34 ( 0.88 - 2.05 ) | Nodal status, chemotherapy |
| BMI – Included, review                                                               |                                                                                                                               |                                                                                              |                                                                                                                                                                                                                                                       |                                   | Breast cancer-specific mortality Pre-menopausal  | ≥30 vs <30 kg/m <sup>2</sup> | 0.63 ( 0.34 - 1.15 ) |                            |
|                                                                                      |                                                                                                                               |                                                                                              |                                                                                                                                                                                                                                                       |                                   | Breast cancer-specific mortality Post-menopausal | ≥30 vs <30 kg/m <sup>2</sup> | 1.86 ( 1.02 - 3.40 ) |                            |

|                                                                                                                   |                                                                                                                                                      |                                                                                                                    |                                                                                                                                                                                  |                                                                       |                                                  |                                |                                                    |                                                                                                                             |
|-------------------------------------------------------------------------------------------------------------------|------------------------------------------------------------------------------------------------------------------------------------------------------|--------------------------------------------------------------------------------------------------------------------|----------------------------------------------------------------------------------------------------------------------------------------------------------------------------------|-----------------------------------------------------------------------|--------------------------------------------------|--------------------------------|----------------------------------------------------|-----------------------------------------------------------------------------------------------------------------------------|
| Kumar, 2000 <sup>179</sup> ,<br>United States<br><br>BMI – Included,<br>review                                    | Follow-up of<br>cases from a<br>case-control ( n=<br>166)<br>Pre and<br>postmenopausal                                                               | Follow-up= 10<br>years (min)                                                                                       | Stage I-IV                                                                                                                                                                       | BMI measured<br>within 3 months<br>of diagnosis<br>before treatment   | All-cause<br>mortality                           | Obese vs non-obese             | 0.92 (0.87 - 0.98)                                 | Tumour stage                                                                                                                |
| Bernstein L,<br>1999 <sup>47</sup> ,<br>Four US Regions<br><br>BMI – Excluded<br>(other second<br>primary cancer) | Population-based<br>nested case-<br>control study (n=<br>995 )<br>Pre- and<br>postmenopausal<br>Age range: 38 - 94<br>years                          | 1978 - 1992<br>Follow up= 3.9<br>years<br>324 second<br>primary cancers<br>(endometrial)                           | Chemotherapy 24.1%<br>Radiotherapy 29.3%<br>Tamoxifen 39.7%                                                                                                                      | From medical<br>records, at<br>diagnosis                              | Endometrial<br>cancer(n=324)                     | ≥28 vs <22.1 kg/m <sup>2</sup> | 2.06 (1.31 - 3.24)                                 | Tamoxifen use, month<br>of oestrogen use, HRT,<br>OC use, smoking status<br>at diagnosis, history of<br>high blood pressure |
| Chen CM, 1999 <sup>400</sup> ,<br>Taiwan<br><br>BMI - Excluded                                                    | Female,<br>Retrospective<br>Cohort of Cancer<br>Survivors (n=332)<br>mean age:51.7,<br>Pre- 46.4%, peri-<br>6.9%,<br>postmenopausal<br>46.7% Chinese | Diagnosed:<br>Treatment: 1990-<br>1997 follow Up:<br>Median 23.5<br>months , Loss to<br>Follow-up: Not<br>reported | Early stage breast<br>cancer. Stage 0 8.1%, I<br>19.6%, IIA 38%, IIB<br>34.3%. ER+ 45.2%, ER-<br>34.6%, unknown 20.2%.<br>PR+ 34.9%, PR- 3.9%,<br>unknown 33.1%. Node+<br>38.3%. | Medical records                                                       | Overall survival<br><br>Disease-free<br>survival |                                | P Log rank test >0.05<br><br>P Log rank test >0.05 |                                                                                                                             |
| Menon, 1999 <sup>314</sup> ,<br>United Kingdom<br><br>BMI - Excluded                                              | Retrospective<br>cohort study (n=<br>448 )<br>Pre- and<br>postmenopausal                                                                             | Follow up= 6<br>years                                                                                              | Invasive primary breast<br>cancer; all stages                                                                                                                                    | Self-reported at<br>diagnosis                                         | Overall<br>survival(n=162)                       | Per 1 kg/m <sup>2</sup>        | 1.000 ( 0.968 - 1.034 )                            | Unadjusted                                                                                                                  |
|                                                                                                                   |                                                                                                                                                      |                                                                                                                    |                                                                                                                                                                                  |                                                                       | Disease-free<br>survival(n=190)                  | Per 1 kg/m <sup>2</sup>        | 1.002 ( 0.973 - 1.031 )                            | Unadjusted                                                                                                                  |
| Saxe, 1999 <sup>329</sup> ,<br>United States<br><br>BMI - Excluded                                                | Prospective<br>cohort study (n=<br>149 )                                                                                                             | 1989-1991 Follow<br>up= 5 years<br>26 deaths                                                                       | In situ 29 cases (19.6%)<br>Invasive 120 cases<br>Stage I 34.5%<br>Stage II 34.5%                                                                                                | Measured as<br>close to the time<br>of her breast<br>cancer diagnosis | Total<br>mortality(n=26)                         | >27 vs ≤27 kg/m <sup>2</sup>   | 0.74 ( 0.32 - 1.71 )                               | Unadjusted                                                                                                                  |

|                                                                                                                                   |                                                                                                                                                                                                              |                                                                                                                                                             |                                                                                                          |                                                                          |                                                                                                          |                                 |                      |                                                                                                                                                                                                                                                                                                                                                   |
|-----------------------------------------------------------------------------------------------------------------------------------|--------------------------------------------------------------------------------------------------------------------------------------------------------------------------------------------------------------|-------------------------------------------------------------------------------------------------------------------------------------------------------------|----------------------------------------------------------------------------------------------------------|--------------------------------------------------------------------------|----------------------------------------------------------------------------------------------------------|---------------------------------|----------------------|---------------------------------------------------------------------------------------------------------------------------------------------------------------------------------------------------------------------------------------------------------------------------------------------------------------------------------------------------|
|                                                                                                                                   | Pre- and postmenopausal<br>Mean age:57.8 years                                                                                                                                                               | 0% lost to follow-up                                                                                                                                        | Stage III 8.8%<br>Stage IV 2.7%<br>ER+ 73.4%<br>ER- 26.6%                                                | as possible, no info on treatment                                        |                                                                                                          |                                 |                      |                                                                                                                                                                                                                                                                                                                                                   |
|                                                                                                                                   |                                                                                                                                                                                                              |                                                                                                                                                             |                                                                                                          |                                                                          | Breast cancer recurrence(n=28)                                                                           | >27 vs ≤27 kg/m <sup>2</sup>    | 0.62 ( 0.27 - 1.41 ) | Unadjusted                                                                                                                                                                                                                                                                                                                                        |
| Habel LA, 1998 <sup>73</sup> , Washington SEER, United States<br><br>BMI -Included, meta-analysis                                 | Retrospective cohort study of cancer survivors (n= 480) age range: 20-74 years<br><br>Pre- and postmenopausal<br><br>Response rate 67.7%<br><br>Excluded women with mastectomy as initial treatment for DCIS | Diagnosed: 1980-1992<br><br>Follow up= 62 months<br><br>103 recurrences                                                                                     | DCIS<br><br>Had breast conserving surgery                                                                | Self-reported at diagnosis                                               | Breast cancer recurrence(n=75)                                                                           | ≥30.8 vs ≤22.8kg/m <sup>2</sup> | 2.3 (1.1 - 4.8)      | Age, follow-up time<br><br>(Tested potential confounders, when appropriate: tumor size and histology of the initial DCIS lesion; radiotherapy; marital status; education level; average alcohol use at diagnosis; age at menarche; menopausal status; parity; age at first birth; breast cancer in first-degree relatives; exogenous hormone use) |
|                                                                                                                                   |                                                                                                                                                                                                              |                                                                                                                                                             |                                                                                                          |                                                                          | Invasive breast cancer recurrence(n=34)                                                                  | ≥30.8 vs ≤22.8kg/m <sup>2</sup> | 3.5 (1.1 - 10.8)     |                                                                                                                                                                                                                                                                                                                                                   |
| Hebert J, 1998 <sup>74</sup> , Memorial Sloan Kettering Cancer Center (MSKCC), United States<br><br>BMI – Included, meta-analysis | Prospective cohort study of cancer survivors (n= 546)<br><br>Pre- (47.3%) and postmenopausal<br>Mean age:52.2 years<br><br>White 86.8%                                                                       | 1982-1984 Follow up= 10 years max<br><br>87 deaths<br><br>73 breast cancer deaths<br><br>109 recurrences<br><br>Vital status obtained for all but one woman | Early-stage invasive breast cancer<br><br>TNM stage I 39.7%<br><br>II 40.6%, IIIa 19.7%<br><br>ER+ 57.1% | Measured at diagnosis and 2 years post-diagnosis<br><br>BMI at diagnosis | Records from cancer centre, registry, National Death Index<br><br>Breast cancer-specific mortality(n=73) | Per 1 kg/m <sup>2</sup>         | 1.06 (1.00 - 1.12)   | Age, menopausal status, Tumour stage, Meat intake, Butter/margarine/lard, Beer, ER status                                                                                                                                                                                                                                                         |

|                                                         |                                                                                                                                                                               |                                                                                                           |                                                                                                                 |                                    |                                                   |                                |                      |                                                                                                      |
|---------------------------------------------------------|-------------------------------------------------------------------------------------------------------------------------------------------------------------------------------|-----------------------------------------------------------------------------------------------------------|-----------------------------------------------------------------------------------------------------------------|------------------------------------|---------------------------------------------------|--------------------------------|----------------------|------------------------------------------------------------------------------------------------------|
|                                                         |                                                                                                                                                                               |                                                                                                           |                                                                                                                 |                                    | Breast cancer-specific mortality<br>Premenopausal | Per 1 kg/m <sup>2</sup>        | 1.12 (1.03-1.22)     |                                                                                                      |
|                                                         |                                                                                                                                                                               |                                                                                                           |                                                                                                                 |                                    | Breast cancer recurrence(n=109 )                  | Per 1 kg/m <sup>2</sup>        | 1.04 ( 1.00 - 1.09 ) | As above but without ER status                                                                       |
|                                                         |                                                                                                                                                                               |                                                                                                           |                                                                                                                 |                                    | Breast cancer recurrence<br>Premenopausal         | Per 1 kg/m <sup>2</sup>        | 1.09 (1.02-1.17)     |                                                                                                      |
| Newman S, 1997 <sup>99</sup> , Northern Alberta, Canada | Prospective cohort study of cancer survivors (final n= 1169)<br><br>Pre- and postmenopausal (61%)<br><br>Mean age:56.1 years<br><br>Excluded 2260 cases with any missing data | 1978-1989 Follow up= 4.35 years<br><br>295 deaths, 244 breast cancer deaths<br><br>7.3% loss to follow-up | Early stage breast cancer, no metastasis<br><br>Stage I 32.1%, II 61.6%, III 6.3%<br><br>ER+ 67.3%<br>ER- 32.7% | Measured at diagnosis              | Breast cancer-specific mortality(n=244)           | ≥29 vs ≤22.7 kg/m <sup>2</sup> | 2.47 ( 1.17 - 5.22 ) | Age, Tumour size, number of positive nodes, oestrogen receptor level, number of positive nodes X BMI |
| BMI – Included, meta-analysis                           |                                                                                                                                                                               |                                                                                                           |                                                                                                                 |                                    |                                                   |                                |                      |                                                                                                      |
| Cook LS, 1996 <sup>58</sup> United States               | Nested case-control study, within a population-based cohort of breast cancer survivor (n= 640 )<br><br>Pre- and postmenopausal                                                | 1978-1990 Follow up= 35 months<br><br>234 contralateral breast cancer                                     | Invasive stage I Stage II 9.8%<br><br>19.8% ER-ve,<br>51.8% ER+ve,                                              | At initial breast cancer diagnosis | Contralateral Breast Cancer(n=207)                | ≥30 vs <22 kg/m <sup>2</sup>   | 0.98 (0.57 - 1.69)   | Age at diagnosis, stage, year of diagnosis, family history, tumour histology, menopausal status      |
| BMI – Included, meta-analysis                           |                                                                                                                                                                               |                                                                                                           |                                                                                                                 |                                    |                                                   |                                |                      |                                                                                                      |

|                                                                                                        |                                                                                 |                                    |                                                                                                                                                                               |              |                                                                                                   |                                  |                        |                                                                                         |
|--------------------------------------------------------------------------------------------------------|---------------------------------------------------------------------------------|------------------------------------|-------------------------------------------------------------------------------------------------------------------------------------------------------------------------------|--------------|---------------------------------------------------------------------------------------------------|----------------------------------|------------------------|-----------------------------------------------------------------------------------------|
|                                                                                                        |                                                                                 |                                    | 4.1% ER intermediate, 17.9% not done, 6.3% unknown, 19.8% PR-ve, 0.1% PR intermediate, 38.7% ER+ve, 26.1% not done, 15.1% unknown                                             |              | Contralateral Breast Cancer(n=68)<br>Premenopausal                                                | ≥30 vs <22 kg/m <sup>2</sup>     | 2.25 ( 0.93 - 5.42 )   |                                                                                         |
|                                                                                                        |                                                                                 |                                    | Unknown 9.9%<br>Radiation therapy 41.3%<br>Unknown 11.5%                                                                                                                      |              | Contralateral Breast Cancer(n=139)<br>Postmenopausal                                              | ≥30 vs <22 kg/m <sup>2</sup>     | 0.61 ( 0.29 - 1.27 )   |                                                                                         |
| Lethaby, 1996 <sup>308</sup> , ABCSG, New Zealand<br>BMI - Excluded                                    | Prospective cohort study (n= 1138 )<br>Pre- and postmenopausal                  | 1976-1985<br>Follow up= 10.2 years | Non-metastatic, node-negative breast cancer                                                                                                                                   | From records | Overall survival<br>Age<50y                                                                       | ≥28 vs <28 kg/m <sup>2</sup>     | P log-rank test = 0.29 | Unadjusted                                                                              |
|                                                                                                        |                                                                                 |                                    |                                                                                                                                                                               |              | Overall survival<br>Age≥50y                                                                       |                                  | P log-rank test = 0.13 | Unadjusted                                                                              |
| Rosner GL, 1996 <sup>253</sup> , Cancer and Leukemia Group (CALGB) 8541, USA<br>BMI – Included, review | Female, Prospective Cohort of Cancer Survivors (n=1435) Pre- and postmenopausal |                                    | Breast cancer. Stage II. Positive regional lymph nodes. Undergoing cycle 1 of adjuvant cyclophosphamide, doxorubicin, and fluorouracil (CAF). Three levels of dose-intensity. | Measured     | Received within 5% of the weight-based doses of CAF 300/30/300<br>Disease-free survival (n=195.0) | ≥27.3 vs <27.3 kg/m <sup>2</sup> | 1.11(0.80-1.53)        | Estrogen receptor status, menopausal status, number of positive lymph nodes, tumor size |
|                                                                                                        |                                                                                 |                                    |                                                                                                                                                                               |              | Received within 5% of the weight-based doses of CAF 400/40/400<br>Disease-free survival (n=158.0) |                                  | 1.04(0.73-1.49)        |                                                                                         |
|                                                                                                        |                                                                                 |                                    |                                                                                                                                                                               |              | Received within 5% of the weight-based doses of                                                   |                                  | 0.87(0.58-1.31)        |                                                                                         |

|                                                                                                                                                    |                                                                                        |                                                                                                                                                     |                                                                                                                                                                                                                           |                                                                 |                                                             |                                                                  |                                            |                                                                                      |
|----------------------------------------------------------------------------------------------------------------------------------------------------|----------------------------------------------------------------------------------------|-----------------------------------------------------------------------------------------------------------------------------------------------------|---------------------------------------------------------------------------------------------------------------------------------------------------------------------------------------------------------------------------|-----------------------------------------------------------------|-------------------------------------------------------------|------------------------------------------------------------------|--------------------------------------------|--------------------------------------------------------------------------------------|
|                                                                                                                                                    |                                                                                        |                                                                                                                                                     |                                                                                                                                                                                                                           |                                                                 | CAF 600/60/600<br>Disease-free survival (n=134.0)           |                                                                  |                                            |                                                                                      |
| Katoh, 1994 <sup>174</sup> ,<br>United States<br><br>BMI – Included,<br>review                                                                     | Retrospective<br>cohort study (n=301 )<br>Postmenopausal<br>Mean age:72<br>years       | 1977-1985 Follow<br>up= 5 years 94                                                                                                                  | Invasive breast cancer<br>Stage I 34%<br>Stage II 51%<br>Stage III 10%<br>Stage IV 6%<br>ER+ 78%<br>ER- 22%<br>PR+ 56%<br>PR- 44%<br>Surgery alone 62%<br>Surgery plus either<br>chemotherapy or<br>radiation therapy 38% | From records                                                    | 5-year breast<br>cancer<br>survival(n=94)<br><br>Recurrence | ≥27.1 vs <27 kg/m <sup>2</sup>                                   | 0.99 (0.41-2.42)<br><br>1.37 (0.73-2.56)   | Age, ER status, PR<br>status, Treatment,<br>Tumor stage, Tumor<br>size, Nodal status |
| Ewertz M,<br>1993 <sup>288</sup> , Danish<br>Breast Cancer<br>Cooperative<br>Group (DBCCG),<br>Denmark<br><br>BMI - Excluded                       | Prospective<br>cohort of cancer<br>survivors (n=2445)<br>Pre- and<br>postmenopausal    | 1983-1984<br>Follow up= 7<br>years (max)<br>805 total deaths<br><br>3 patients lost to<br>follow-up                                                 | Primary invasive breast<br>cancer Grade I 44.8%<br>Grade II 42.3% Grade III<br>12.8%<br>Adjuvant therapy                                                                                                                  | Self-reported,<br>data collected a<br>year after<br>diagnosis   | Total mortality<br><br>Advanced disease                     | ≥ 30 vs <20-24 kg/m <sup>2</sup>                                 | 0.98 ( - )<br>Not significant              | Tumor size, grade, nodal<br>status, skin invasion                                    |
| Bastarrachea J,<br>1993 <sup>265</sup> , MD<br>Anderson Cancer<br>Center (MDACC),<br>Texas Review<br>Study, United<br>States<br><br>BMI - Excluded | Retrospective<br>cohort of cancer<br>survivors (n= 735 )<br>Pre- and<br>postmenopausal | Treatment: 1974-<br>1982 Follow up=<br>10.7 years<br>298 breast cancer<br>deaths<br>362 disease-free<br>survival events<br>1% lost to follow-<br>up | Node+ primary invasive<br>breast cancer<br>Stage II 69.2%<br>Stage III 30.7%<br>Treated with<br>fluorouracil-<br>doxorubicin-<br>cyclophosphamide-<br>containing adjuvant<br>chemotherapy<br>protocols                    | From records at<br>the start of<br>adjuvant therapy             | Breast cancer<br>mortality(n=298)                           | Obese (>20% ideal<br>weight) vs non-obese<br>(≤20% ideal weight) | 1.36 (1.06-1.76)                           | Tumour stage, nodal<br>status, menopausal<br>status                                  |
|                                                                                                                                                    |                                                                                        |                                                                                                                                                     |                                                                                                                                                                                                                           |                                                                 | Disease free<br>survival(n=362)                             | Obese (>20% ideal<br>weight) vs non-obese<br>(≤20% ideal weight) | 1.33 (1.05-1.68)                           |                                                                                      |
| Rohan, 1993 <sup>326</sup> ,<br>Australia<br><br>BMI - Excluded                                                                                    | Follow-up of<br>cases of<br>population-based                                           | 1982-1984 Follow<br>up= 5.5 years<br>112 breast cancer<br>mortality, 11                                                                             | Primary breast cancer,<br>any stages                                                                                                                                                                                      | FFQ, interviewed<br>on average 4.8<br>months after<br>diagnosis | Breast cancer-<br>specific<br>mortality(n=112)              | ≥30 vs <23 kg/m <sup>2</sup>                                     | 3.39 ( 1.84 - 6.25 )<br><br>P trend=<0.001 | Unadjusted                                                                           |

|                                                                             |                                                                                      |                                                             |                                                                                                                                                             |                                             |                                  |                               |                                        |                                                                   |
|-----------------------------------------------------------------------------|--------------------------------------------------------------------------------------|-------------------------------------------------------------|-------------------------------------------------------------------------------------------------------------------------------------------------------------|---------------------------------------------|----------------------------------|-------------------------------|----------------------------------------|-------------------------------------------------------------------|
|                                                                             | case-control study (n= 412 )<br>Pre- and post-menopausal<br>Mean age:55.1 years      | other causes of deaths<br><br>39 patients lost to follow-up |                                                                                                                                                             |                                             |                                  |                               |                                        |                                                                   |
| Albain KS, 1992 <sup>260</sup> ,<br>United States<br><br>BMI - Excluded     | Secondary analysis of clinical trial (n= 768 )<br>Pre- and postmenopausal            | Treatment 1975-1989 Follow up= 263 deaths                   | Node+ breast cancer<br>ER+ 54%<br>ER- 25%<br>Unknown 21%<br>Tumor size:<br>T1 or T2 (<=5cm) 89%<br>T3 (>5cm) 9% Unknown 2%<br>Undergoing adjuvant treatment | From records, prior to adjuvant therapy     | Overall survival                 | >28 vs ≤28 kg/ m <sup>2</sup> | No independent prognostic significance | Unadjusted                                                        |
|                                                                             |                                                                                      |                                                             |                                                                                                                                                             |                                             | Disease-free survival            | >28 vs ≤28 kg/ m <sup>2</sup> | No independent prognostic significance | Unadjusted                                                        |
| Gordon, 1992 <sup>293</sup> ,<br>United States<br><br>BMI - Excluded        | Prospective cohort study (n= 1392 )<br>Pre- and postmenopausal<br>Mean age; 76 years | 1974-1985 Follow up= 16 years<br><br>2.9% loss to follow up | Any stages<br>ER+ 76.4%<br>ER- 23.6%<br>Tumor diameter (cm):<br>T1:≤2 44.4%, T2:>2-≤5 48.1%, T3:>5 7.5%,<br>among those with data<br>All mastectomy         | Measured                                    | Overall survival                 | ≥36 vs ≤19 kg/m <sup>2</sup>  | 1.43 (1.09-1.88)                       | Unadjusted                                                        |
|                                                                             |                                                                                      |                                                             |                                                                                                                                                             |                                             | Disease-free survival            | ≥36 vs ≤19 kg/m <sup>2</sup>  | 1.22 (0.93-1.60)                       | Unadjusted                                                        |
| Senie, 1992 <sup>201</sup> ,<br>United States<br><br>BMI – Included, review | Prospective cohort study (n= 923 )<br>Pre- and postmenopausal<br>Mean age:55.5 years | 1976-1978 Follow up= 10 years                               | In situ 82 cases Invasive 841 cases                                                                                                                         | Measured at hospital admission post-surgery | 10y disease free survival(n=448) | Obese vs Non-obese            | 1.29 ( 1 - 1.67 )                      | Tumor size, Nodal status, Age at diagnosis, Adjuvant chemotherapy |

|                                                                                                                                                             |                                                                                                                                   |                                                              |                                                                                                                                             |                                      |                                                                        |                                  |                      |                                                                                                                                |
|-------------------------------------------------------------------------------------------------------------------------------------------------------------|-----------------------------------------------------------------------------------------------------------------------------------|--------------------------------------------------------------|---------------------------------------------------------------------------------------------------------------------------------------------|--------------------------------------|------------------------------------------------------------------------|----------------------------------|----------------------|--------------------------------------------------------------------------------------------------------------------------------|
| Storm HH, 1992 <sup>108</sup> , Danish Cancer Registry Case-Control Study, Denmark<br><br>BMI – Included, meta-analysis                                     | Nested case-control study, within a cohort of breast cancer survivor (n= 1058) Pre- and postmenopausal                            | 1943-1978 Follow up= 8 years 271 contralateral breast cancer | In situ:0 Invasive:1058 Primary invasive breast cancer; localized, regional, distant metastasis > 90% mastectomy, 82% adjuvant radiotherapy | At first breast cancer diagnosis     | Contralateral Breast Cancer(n=271)                                     | ≥30 vs <20                       | 1.77 (1.00 - 3.14)   | Age, year of diagnosis, survival time radiotherapy, hormonal therapy, chemotherapy, menopausal status, family history, parity, |
| Ewertz M, 1991 <sup>67</sup> , Danish Breast Cancer Cooperative Group (DBCG) and DCR (Danish Cancer Registry), Denmark<br><br>BMI – Included, meta-analysis | Prospective cohort study of cancer survivors (n=2445) Pre- and postmenopausal Response rate 87%, 1744 patients with complete data | 1983-1984<br>Max follow up= 7 years<br>805 deaths            | Invasive breast cancer, grade I-III                                                                                                         | Self-reported a year after diagnosis | Record linkage with population registry<br><br>Total mortality (n=514) | ≥30 vs 20-24.9 kg/m <sup>2</sup> | 0.98 ( 0.72 - 1.34 ) | Age, tumour size, nodal status, tumour grade, skin invasion, stratified for residence                                          |
|                                                                                                                                                             |                                                                                                                                   |                                                              |                                                                                                                                             |                                      | Total mortality Advanced disease (n=456)                               | ≥30 vs 20-24.9 kg/m <sup>2</sup> | 0.98 (0.71-1.36)     |                                                                                                                                |



|                                                                                            |                                                                                                                                                          |                                                 |                                                                                                                                                                          |                                                                                                                                         |                                                   |                                                         |                      |                                                                                               |
|--------------------------------------------------------------------------------------------|----------------------------------------------------------------------------------------------------------------------------------------------------------|-------------------------------------------------|--------------------------------------------------------------------------------------------------------------------------------------------------------------------------|-----------------------------------------------------------------------------------------------------------------------------------------|---------------------------------------------------|---------------------------------------------------------|----------------------|-----------------------------------------------------------------------------------------------|
|                                                                                            |                                                                                                                                                          |                                                 |                                                                                                                                                                          |                                                                                                                                         | Total mortality<br>Early disease<br>(n=58)        | ≥30 vs 20-24.9<br>kg/m <sup>2</sup>                     | 1.53 (0.54-4.36)     | Adjusted for age,<br>stratified for residence.                                                |
| Nomura, 1991 <sup>192</sup> ,<br>Hawaii, United<br>States<br><br>BMI – Included,<br>review | Follow up of cases<br>from a case-<br>control study (n=<br>343 )<br>Pre- and<br>postmenopausal<br>Age range: 45-74<br>years<br>Caucasian and<br>Japanese | 1975 and 1980<br>Follow up= 12.5<br>years (max) | In situ:29 Invasive:314<br>Japanese: 12% in situ,<br>63% localized, 24%<br>regional, 1% distant;<br>Caucasian: 5% in situ,<br>56% localized, 36%<br>regional, 3% distant | Interviewed on<br>average 2.2<br>months after<br>diagnosis                                                                              | Breast cancer-<br>specific mortality<br>Caucasian | High vs Low obesity<br>index ((kg/m <sup>1.5182</sup> ) | 1.15 ( 0.51 - 2.62 ) | Tumor stage,<br>menopausal status,<br>Hormonal therapy, Fat<br>intake                         |
|                                                                                            |                                                                                                                                                          |                                                 |                                                                                                                                                                          |                                                                                                                                         | Breast cancer-<br>specific mortality<br>Japanese  | High vs Low                                             | 3.53 ( 1.25 - 10 )   |                                                                                               |
| Camoriano,<br>1990 <sup>147</sup> , United<br>States<br><br>BMI – Included,<br>review      | Secondary<br>analysis of clinical<br>trial (n= 646 )<br>Pre- and<br>postmenopausal<br>Age range:20-75<br>years                                           | Follow up= 6.6<br>years                         | Node-positive breast<br>cancer<br>All had mastectomy                                                                                                                     | Measured within<br>8 weeks of post-<br>surgery, followed<br>during and after<br>receiving 60<br>weeks of<br>treatment or<br>observation | Overall survival<br>pre-menopausal                | ≥28 vs <28 kg/m <sup>2</sup>                            | 1.70 ( 0.99 - 2.94 ) | Age, Nodal status,<br>estrogen receptor level,<br>Tumor size, Nuclear<br>grade, Weight change |
| Coates, 1990 <sup>281</sup> ,<br>Georgia<br><br>BMI - Excluded                             | Prospective<br>cohort study<br>(n=1960)<br>Pre- and post-<br>menopausal                                                                                  | 1975-1979<br>Follow-up: 5 years<br>(min)        | Stage I 23.37%<br>Stage II 53.93%<br>Stage III 16.58%<br>Stage IV 6.12%<br>Surgery 95.82%<br>Radiation 11.37%<br>Hormonal therapy<br>1.79%                               | Measured at<br>study baseline                                                                                                           | Breast cancer<br>mortality                        | 20.6-24.5 vs ≥24.6<br>kg/m <sup>2</sup>                 | P trend= <0.001      |                                                                                               |

|                                                                                          |                                                                                                       |                                                                                                                                                                                                                                                                 | Chemotherapy 5.67%                                                                                                                                                                                                                              |                                                |                                            |                                         |                                                               |                                                                                                                                                                                                                |
|------------------------------------------------------------------------------------------|-------------------------------------------------------------------------------------------------------|-----------------------------------------------------------------------------------------------------------------------------------------------------------------------------------------------------------------------------------------------------------------|-------------------------------------------------------------------------------------------------------------------------------------------------------------------------------------------------------------------------------------------------|------------------------------------------------|--------------------------------------------|-----------------------------------------|---------------------------------------------------------------|----------------------------------------------------------------------------------------------------------------------------------------------------------------------------------------------------------------|
| Kimura, 1990 <sup>302</sup> ,<br>Japan<br><br>BMI - Excluded                             | Retrospective cohort study (n= 593)<br>Pre- and post-menopausal                                       | Treatment: 1972-1988<br>Follow-up= 16 years (max)                                                                                                                                                                                                               | Stage I-III<br>Had radical operation                                                                                                                                                                                                            | From medical records                           | Overall survival                           | <21 to 21.1-23 vs >23 kg/m <sup>2</sup> | 5 year survival<br>Not significant<br>10 y survival<br>P<0.05 |                                                                                                                                                                                                                |
| Kyogoku S, 1990 <sup>305</sup> ,<br>Fukuoka, Japan<br><br>BMI - Excluded                 | Follow-up of cases from a case-control study (n= 213) Pre- and postmenopausal<br>Mean age: 55.5 years | 1975-1978<br>Follow up= 12 years<br>64 deaths,<br>47 breast cancer deaths,<br>6 deaths from second primary cancer,<br>4 deaths from cardiac failures,<br>3 deaths from cerebrovascular diseases,<br>4 other causes of death<br><br>9 patients lost to follow-up | Invasive breast cancer<br>TNM Stage I 80 cases<br>Stage II 102 cases<br>Stage III 13 cases<br>Radical surgery 96%<br>Radical mastectomy 93.9%<br>Palliate surgery 13<br>Chemotherapy 40.8%<br>Radiation therapy 7.5%<br>Endocrine therapy 61.0% | Interviewed, assessed 1-3 months after surgery | Total mortality(n=64)                      | ≥25 vs <20 kg/ m <sup>2</sup>           | 2.51 ( - )<br><br>P trend=<0.01                               | Tumor stage, age of menarche, age at first birth, menopausal status, history of abortion, smoking, radiotherapy, chemotherapy, hormonal therapy, type of operative procedure, history of benign breast disease |
| Mason, 1990 <sup>188</sup> ,<br>ABCSG, Australia<br><br>BMI – Included, review           | Prospective cohort study (n= 2706)<br>Pre- and post-menopausal                                        | 1976-1985<br>Follow up= 7 years                                                                                                                                                                                                                                 | Incident breast cancer; any stages                                                                                                                                                                                                              | From records at diagnosis                      | Breast cancer mortality (n=586)            | <28 vs ≥28 kg/m <sup>2</sup>            | 0.67 ( 0.55 - 0.83 )                                          | Age, Age at first birth, Age of menarche, parity, Lactation, Season                                                                                                                                            |
|                                                                                          |                                                                                                       |                                                                                                                                                                                                                                                                 |                                                                                                                                                                                                                                                 |                                                | Breast cancer mortality (n=176)<br>Age<50y | <28 vs ≥28 kg/m <sup>2</sup>            | 0.73 ( 0.5 - 1.09 )                                           |                                                                                                                                                                                                                |
|                                                                                          |                                                                                                       |                                                                                                                                                                                                                                                                 |                                                                                                                                                                                                                                                 |                                                | Breast cancer mortality (n=410)<br>Age≥50y | <28 vs ≥28 kg/m <sup>2</sup>            | 0.65 ( 0.52 - 0.83 )                                          |                                                                                                                                                                                                                |
| Kamby C, 1989 <sup>299</sup> ,<br>Danish Breast Cancer Cooperative Group (DBCG), Denmark | Secondary analysis of clinical trial (n= 3802 )<br>Pre- and postmenopausal recruited: 1977-1984       | Follow up= 4.9 years                                                                                                                                                                                                                                            | Primary breast cancer                                                                                                                                                                                                                           | From records, after treatment                  | Overall survival<br>Premenopausal          | ≥2.4 vs <2.4 g/cm <sup>2</sup>          | P = 0.78                                                      | Unadjusted                                                                                                                                                                                                     |

|                                                                                                                       |                                                                                                                       |                                              |                                                                                                                                                |                               |                                          |                                                         |                                                                        |                                                |
|-----------------------------------------------------------------------------------------------------------------------|-----------------------------------------------------------------------------------------------------------------------|----------------------------------------------|------------------------------------------------------------------------------------------------------------------------------------------------|-------------------------------|------------------------------------------|---------------------------------------------------------|------------------------------------------------------------------------|------------------------------------------------|
| (Superseded by Ewertz, 2011)                                                                                          |                                                                                                                       |                                              |                                                                                                                                                |                               |                                          |                                                         |                                                                        |                                                |
| BMI - Excluded                                                                                                        |                                                                                                                       |                                              |                                                                                                                                                |                               | Overall survival Postmenopausal          | ≥2.4 vs <2.4 g/cm <sup>2</sup>                          | P = 0.83                                                               | Unadjusted                                     |
|                                                                                                                       |                                                                                                                       |                                              |                                                                                                                                                |                               | Progression-free survival Premenopausal  | ≥2.4 vs <2.4 g/cm <sup>2</sup>                          | P = 0.99                                                               |                                                |
|                                                                                                                       |                                                                                                                       |                                              |                                                                                                                                                |                               | Progression-free survival Postmenopausal | ≥2.4 vs <2.4 g/cm <sup>2</sup>                          | P = 0.73                                                               |                                                |
| Suissa, 1989 <sup>341</sup> , NSABBP B-04, Canada                                                                     | Retrospective cohort study of cases of RCT (n= 68 )<br>Premenopausal 38%<br>Postmenopausal 62%<br>Mean age:52.7 years | 1971-1973<br>Follow up= 13 years             | Stage II 31%<br>Total mastectomy with irritation 41%<br>Total mastectomy with no further treatment 37%                                         | At the time of the mastectomy | Overall survival                         | Per 1 unit (0.01 x wt in lbs/ht <sup>2</sup> in inches) | Significant curvilinear relationship P=0.002                           | Age, Tumor stage, menopausal status, Treatment |
| BMI - Excluded                                                                                                        |                                                                                                                       |                                              |                                                                                                                                                |                               |                                          |                                                         |                                                                        |                                                |
| Taylor SG IV, 1989 <sup>345</sup> , ECOG E, United States                                                             | Secondary analysis of clinical trial (n= 265 )<br>Post-menopausal<br>Age ≤65 years<br>Recruited until 1981            | Follow up= 74 months<br>109 deaths           | Invasive breast cancer with axillary nodal involvement<br>Mastectomy and axillary node dissection: 100%;<br>No postoperative radiation therapy | Prior to adjuvant therapy     | Overall survival                         | >28 vs <24 kg/m <sup>2</sup>                            | Obesity was a significant independent risk factor for overall survival | Unadjusted                                     |
| BMI - Excluded                                                                                                        |                                                                                                                       |                                              |                                                                                                                                                |                               |                                          |                                                         |                                                                        |                                                |
| Hebert, 1988 <sup>295</sup> , Memorial Sloan Kettering Cancer Center (MSKCC), Two-Year Follow-up Study, United States | Prospective cohort study (n= 472) age range: 20-80 years<br>Pre- and post-menopausal                                  | Enrolment: 1982-1986<br>Follow up= 27 months | Invasive breast cancer                                                                                                                         | From records                  | Recurrence-free Stage I                  | ≤28 vs >28 kg/m <sup>2</sup>                            | 4.17 (1.35 - 12.93)                                                    | Unadjusted                                     |
| BMI – Excluded                                                                                                        |                                                                                                                       |                                              |                                                                                                                                                |                               | Recurrence-free Stage II                 | ≤28 vs >28 kg/m <sup>2</sup>                            | 1.35 (0.44 - 4.15)                                                     | Unadjusted                                     |

|                                                                                                                        |                                                                                                  |                                                                                             |                                                                                                                    |                                             | Recurrence-free Stage III                   | ≤28 vs >28 kg/m <sup>2</sup>     | 1.12 (0.34 - 3.65)             | Unadjusted                                                                                                                                                      |
|------------------------------------------------------------------------------------------------------------------------|--------------------------------------------------------------------------------------------------|---------------------------------------------------------------------------------------------|--------------------------------------------------------------------------------------------------------------------|---------------------------------------------|---------------------------------------------|----------------------------------|--------------------------------|-----------------------------------------------------------------------------------------------------------------------------------------------------------------|
| Horn, 1988 <sup>171</sup> , Connecticut Tumor Registry Case-Control Study, United States<br><br>BMI – Included, review | Follow-up of cases of a case-control study (n= 556 ) Pre- and postmenopausal mean age:57         | Since 1935 Follow up= 8 years 292 contralateral breast cancer, 264 unilateral breast cancer | First primary breast cancer 75% radical or modified radical mastectomy (both cases and controls)                   | From records                                | Contralateral Breast Cancer(n=251)          | ≥35 vs ≤34 kg/m <sup>2</sup>     | 1.1 ( 0.7 - 1.7 )              | Nulliparity, menopausal status, Estrogen use, smoking, family history, Histology , chemotherapy, radiotherapy, Time since diagnosis, Age, Benign breast disease |
| Mohle-Boetani, 1988 <sup>315</sup> , United States<br><br>BMI - Excluded                                               | Follow-up of cases from a case-control study (n= 838 ) Pre- and postmenopausal Mean age:56 years | 1973 - 1982 Follow up= 6 years 257 deaths                                                   | Invasive breast cancer AJCC Stages I 24% Stage II 32% Stage II or IIIA 34% Stage IIIA 5% Stage IIIB 4% Stage IV 2% | Self-reported at diagnosis                  | All-cause mortality (n=256)                 | 34.7 vs ≤30.4 lb/in <sup>2</sup> | 1.4 ( - )<br><br>P trend=0.02  | Age at diagnosis, Tumor stage, Follow up time                                                                                                                   |
|                                                                                                                        |                                                                                                  |                                                                                             |                                                                                                                    |                                             | All-cause mortality(n=61) Pre-menopausal    | 34.7 vs ≤30.4 lb/in <sup>2</sup> | 1.6 ( - )<br><br>P trend=0.0 8 |                                                                                                                                                                 |
|                                                                                                                        |                                                                                                  |                                                                                             |                                                                                                                    |                                             | All-cause mortality (n=193) Post-menopausal | 34.7 vs ≤30.4 lb/in <sup>2</sup> | 1.3 ( - )<br><br>P trend=0.08  |                                                                                                                                                                 |
| McNee, 1987 <sup>313</sup> , Auckland Breast Cancer Records, New Zealand<br><br>BMI - Excluded                         | Prospective cohort study (n= ) Pre- and post-menopausal Age range:34-64 calendar year:1976-1983  | Follow up= 4 years                                                                          |                                                                                                                    | Measured/self-reported pre-operative weight | Disease-free survival cases with tumor size | ≥28 vs <28 kg/m <sup>2</sup>     | P log-rank test <0.05          | Unadjusted                                                                                                                                                      |
| Papatestas, 1986 <sup>318</sup> , United States<br><br>BMI - Excluded                                                  | Retrospective cohort study (n= 377 ) Pre- and postmenopausal                                     | Surgery 1977-1984 Follow up= 7 years                                                        | All invasive breast cancer                                                                                         | From records                                | Disease-free survival(n=98)                 | 3.4 vs 3.5                       | P = 0.1                        | Nodal status, Tumor differentiation, Hormone receptor status                                                                                                    |
| Eberlein T, 1985 <sup>394</sup> , USA                                                                                  | Female, Retrospective Cohort of Cancer                                                           | Diagnosed: From 1971                                                                        | Primary breast cancer. Stage I-III. 38% had mastectomy prior to but                                                | Medical records                             | Overall survival (n=57.0)                   | Quetelet index >3.5 vs ≤3.5      | Mantel-Haenszel test P=0.11    | Age, number of positive lymph nodes                                                                                                                             |

|                                                                                             |                                                                                                                                                               |                                   |                                                                                                                                                                             |                                                                                                   |                                         |                                                         |                                  |                                                                                                                               |
|---------------------------------------------------------------------------------------------|---------------------------------------------------------------------------------------------------------------------------------------------------------------|-----------------------------------|-----------------------------------------------------------------------------------------------------------------------------------------------------------------------------|---------------------------------------------------------------------------------------------------|-----------------------------------------|---------------------------------------------------------|----------------------------------|-------------------------------------------------------------------------------------------------------------------------------|
| BMI - Excluded                                                                              | Survivors (n=231)<br>Pre- and postmenopausal                                                                                                                  |                                   | within 6 months of study admission. Underwent chemotherapy and radiotherapy.                                                                                                |                                                                                                   | Disease free survival (n=67.0)          | (100 x weight in pounds/height in inches <sup>2</sup> ) | Mantel-Haenszel test<br>P=0.04   |                                                                                                                               |
| Heasman KZ, 1985 <sup>395</sup> , Canada, BMI - Excluded                                    | Female, Retrospective Cohort of Cancer Survivors (n=237)<br>Pre- and postmenopausal mean age:47.5<br>Pre- (80.2%) and postmenopausal (18.1%). Unknown (1.7%). | Diagnosed:1975-1981               | Breast cancer. 1-3 lymph nodes+ 44%, 4 nodes+ 25%, unknown no. Nodes+ 27%, undetermined 2%, nodes - 2%. ER+ 38%, ER- 42%, ER equivocal 20%. Undergone adjuvant chemotherapy | Before and after treatment                                                                        | Overall survival<br><br>Recurrence-free | Per 1 unit                                              | P=0.04<br><br>P=0.05             |                                                                                                                               |
| Ewertz M, 1984 <sup>287</sup> , Denmark<br><br>BMI – Excluded (other second primary cancer) | Case control study (115 cases, 235 controls)<br>Pre- and postmenopausal<br>Mean age: 59 years                                                                 | 1943-1977                         | Primary breast cancer                                                                                                                                                       |                                                                                                   | Endometrial cancer(n=106)               | >31 vs <22 kg/m <sup>2</sup>                            | 2.3 (0.9 - 6.2)<br>P trend=0.055 | Matched by age at breast cancer diagnosis, length of survival with an intact uterus, calendar year of breast cancer diagnosis |
| Boyd, 1981 <sup>272</sup> , Canada<br><br>BMI - Excluded                                    | Secondary analysis of clinical trial (n= 749 ) Pre- and postmenopausal age range:35-70 calendar year:1965-1972                                                | Follow up= ranged from 8-15 years | All invasive breast cancer                                                                                                                                                  | From records at enrolment that was made within 10 days to 3 months after surgery of breast cancer | Disease-free survival                   | Per 1 unit                                              | P = 0.02                         | Unadjusted                                                                                                                    |
| Tartter, 1981 <sup>344</sup> , United States<br><br>BMI - Excluded                          | Retrospective cohort study (n= 374 ) Pre- and postmenopausal                                                                                                  | Follow up= 5 years                |                                                                                                                                                                             | Pre-operative                                                                                     | 5y disease free survival(n=28)          | ≥3.5 vs <3.5                                            | P = 0.24                         | Unadjusted                                                                                                                    |
| Sohrabi, 1980 <sup>338</sup> , United States<br><br>BMI - Excluded                          | Retrospective cohort study Pre- and postmenopausal calendar year:1968-1979                                                                                    | Follow up=                        |                                                                                                                                                                             | After treatment                                                                                   | Recurrence-free normal axillary nodes   | ≤2.45 vs >2.45                                          | P = 0.425                        | Unadjusted                                                                                                                    |

|                                                                 |                                                                                                     |                          |                                                                                                     |                       |                                         |                                                   |                                         |            |
|-----------------------------------------------------------------|-----------------------------------------------------------------------------------------------------|--------------------------|-----------------------------------------------------------------------------------------------------|-----------------------|-----------------------------------------|---------------------------------------------------|-----------------------------------------|------------|
|                                                                 |                                                                                                     |                          |                                                                                                     |                       | Recurrence-free abnormal axillary nodes | ≤2.45 vs >2.45                                    | P = 0.343                               | Unadjusted |
| Donegan, 1978 <sup>285</sup><br>United States<br>BMI - Excluded | Hospital-based study (n=83)<br>Mean age: 56.4                                                       | Follow up= 5 years max   | Had mastectomy                                                                                      | From hospital records | Overall survival                        | ≤2.45 vs >2.45 lb/inch                            | Not significantly lower for obese women |            |
| Abe, 1976 <sup>258</sup> ,<br>Japan,<br>BMI - Excluded          | Retrospective cohort study (n= 134, 82 in analysis )<br>Pre and postmenopausal<br>Mean age:47 years | Follow up= 5 years (max) | Stages: 31.3% I, 42.5% II, 19.4% III, 6.7% IV;<br>Tumor grades: 22.4% T1, 53% T2, 17.2% T3, 7.5% T4 | No description        | 5-year survival(n=21)                   | Obese vs non-obese (>20% vs ≤20% standard weight) | 5-year survival 55.6% vs 79.9%          | Unadjusted |

**Supplementary Table S5 Description of studies included in or excluded from the descriptive review or meta-analysis of waist circumference (WC)**

| Author, year, study name, country                                                                                                                                  | Study description                                                                                          | Time of diagnosis and follow-up                   | Disease characteristics treatment                                                                                                                                                                                                                    | Exposure assessment                            | Outcome (Events)                             | Contrast        | RR (95% CI)      | Covariates                                                        |
|--------------------------------------------------------------------------------------------------------------------------------------------------------------------|------------------------------------------------------------------------------------------------------------|---------------------------------------------------|------------------------------------------------------------------------------------------------------------------------------------------------------------------------------------------------------------------------------------------------------|------------------------------------------------|----------------------------------------------|-----------------|------------------|-------------------------------------------------------------------|
| Bandera EV, 2021 <sup>118</sup> , Women's Circle of Health Study and the Women's Circle of Health Follow-Up Study (WCHFS), USA<br><br>WC – Included, meta-analysis | Population-based cohort (n=1891), mean age:54.5, Pre-menopausal 39%, post-menopausal 61%, African-American | Diagnosed: 2005-2020, Follow Up: median 5.9 years | Ductal carcinoma in situ or invasive breast cancer. Stage 0 18%, I 36%, II 32%, III 10%, IV 2%. ER positive 70%, negative 27%, missing 3%. No surgery 3%, lumpectomy 51%, mastectomy 46%. Chemotherapy 55%. Radiotherapy 68%. Endocrine therapy 64%. | Measured 2005- February 2020 to September 2020 | All-cause mortality (n=274.0)                | 110.91 vs 90.5  | 1.74 (1.26-2.41) | Age, income, smoking, tumor stage, tumor subtype, type of surgery |
|                                                                                                                                                                    |                                                                                                            |                                                   |                                                                                                                                                                                                                                                      |                                                |                                              | Per 10 cm       | 1.14 (1.06-1.23) |                                                                   |
|                                                                                                                                                                    |                                                                                                            |                                                   |                                                                                                                                                                                                                                                      |                                                | Premenopausal All-cause mortality (n=102.0)  | 110.91 vs 90.5  | 1.55 (0.93-2.59) |                                                                   |
|                                                                                                                                                                    |                                                                                                            |                                                   |                                                                                                                                                                                                                                                      |                                                |                                              | Per 10 cm       | 1.10 (0.98-1.24) |                                                                   |
|                                                                                                                                                                    |                                                                                                            |                                                   |                                                                                                                                                                                                                                                      |                                                | Postmenopausal All-cause mortality (n=172.0) | 110.91 vs 90.5  | 2.12 (1.35-3.31) |                                                                   |
|                                                                                                                                                                    |                                                                                                            |                                                   |                                                                                                                                                                                                                                                      |                                                |                                              | Per 10 cm       | 1.17 (1.07-1.29) |                                                                   |
|                                                                                                                                                                    |                                                                                                            |                                                   |                                                                                                                                                                                                                                                      |                                                | ER positive All-cause mortality (n=167.0)    | 110.91 vs 90.59 | 1.57 (1.03-2.39) |                                                                   |
|                                                                                                                                                                    |                                                                                                            |                                                   |                                                                                                                                                                                                                                                      |                                                |                                              | Per 10 cm       | 1.16 (1.06-1.28) |                                                                   |
|                                                                                                                                                                    |                                                                                                            |                                                   |                                                                                                                                                                                                                                                      |                                                | ER negative All-cause mortality (n=103.0)    | 110.91 vs 90.59 | 1.90 (1.10-3.29) |                                                                   |
|                                                                                                                                                                    |                                                                                                            |                                                   |                                                                                                                                                                                                                                                      |                                                |                                              | Per 10 cm       | 1.12 (0.99-1.27) |                                                                   |
|                                                                                                                                                                    |                                                                                                            |                                                   |                                                                                                                                                                                                                                                      |                                                | Age <=45y All-cause mortality (n=66)         |                 | 1.16 (0.97-1.40) |                                                                   |
|                                                                                                                                                                    |                                                                                                            |                                                   |                                                                                                                                                                                                                                                      |                                                | Age 46-59y All-cause mortality (n=118)       |                 | 1.07 (0.96-1.19) |                                                                   |
|                                                                                                                                                                    |                                                                                                            |                                                   |                                                                                                                                                                                                                                                      |                                                | Age >=60 All-cause mortality (n=90)          |                 | 1.28 (1.12-1.46) |                                                                   |
| Breast cancer-specific mortality (n=168.0)                                                                                                                         | 110.91 vs 90.5                                                                                             | 1.64 (1.08-2.48)                                  |                                                                                                                                                                                                                                                      |                                                |                                              |                 |                  |                                                                   |
|                                                                                                                                                                    | Per 10 cm                                                                                                  | 1.11 (1.01-1.22)                                  |                                                                                                                                                                                                                                                      |                                                |                                              |                 |                  |                                                                   |
| Buono G, 2020 <sup>255</sup> , Italy<br><br>WC – Included, review                                                                                                  | Retrospective cohort (n=717)                                                                               | Diagnosed: 2009-2013                              | Early breast cancer. Stage I-III                                                                                                                                                                                                                     | Measured during diagnosis                      | Overall survival (n=88.0)                    | 88 vs 88.1      | 2.34 (1.32-4.14) | Age, stage, treatment, tumor subtype                              |
|                                                                                                                                                                    |                                                                                                            |                                                   |                                                                                                                                                                                                                                                      |                                                | Cancer specific mortality                    |                 | 3.24 (1.64-6.41) |                                                                   |
|                                                                                                                                                                    |                                                                                                            |                                                   |                                                                                                                                                                                                                                                      |                                                | Disease free survival (n=156.0)              |                 | 1.36 (0.91-2.02) |                                                                   |
|                                                                                                                                                                    |                                                                                                            |                                                   |                                                                                                                                                                                                                                                      |                                                |                                              |                 | P trend=0.1      |                                                                   |

| Author, year, study name, country                                                                              | Study description                                                          | Time of diagnosis and follow-up                 | Disease characteristics treatment                                                                                                                                        | Exposure assessment                                            | Outcome (Events)                                    | Contrast           | RR (95% CI)         | Covariates                                                                                                  |
|----------------------------------------------------------------------------------------------------------------|----------------------------------------------------------------------------|-------------------------------------------------|--------------------------------------------------------------------------------------------------------------------------------------------------------------------------|----------------------------------------------------------------|-----------------------------------------------------|--------------------|---------------------|-------------------------------------------------------------------------------------------------------------|
| Wisse A, 2018 <sup>207</sup> , Breast Cancer Blood Study (BC Blood Study), Sweden<br><br>WC – Included, review | Prospective cohort study of cancer survivors (n= 1640), mean age:60.9 year | Follow up= 3.05 years, Calendar year: 2002-2016 | Invasive breast cancer ER+ 88.5%, PgR+ 71.1%, HER2+ 11.1% Invasive breast cancer, tumour grade: 27.8% III<br>Chemotherapy: 27.6%; Radiotherapy: 61.7%; Trastuzumab: 8.1% | Before chemotherapy circumference measured by a trained nurse. | Overall survival (n=134)                            | ≥80 cm vs. < 80 cm | 1.92 (1.16 - 3.18)  | Age, Tumour size, lymph node involvement, histological grade, ER status, alcohol intake, smoking, Treatment |
|                                                                                                                |                                                                            |                                                 |                                                                                                                                                                          |                                                                | Overall survival (n=111)                            | ≥80 cm vs. < 80 cm | 1.34 (0.70-2.54)    | Above factors + BMI                                                                                         |
|                                                                                                                |                                                                            |                                                 |                                                                                                                                                                          |                                                                | Overall survival (n=17)<br>Age <50 years            | ≥80 cm vs. < 80 cm | 1.36 (0.43-4.30)    | Age, Tumour size, lymph node involvement, histological grade, ER status                                     |
|                                                                                                                |                                                                            |                                                 |                                                                                                                                                                          |                                                                | Overall survival (n=117)<br>Age ≥50 years           | ≥80 cm vs. < 80 cm | 2.06 (1.17-3.62)    |                                                                                                             |
|                                                                                                                |                                                                            |                                                 |                                                                                                                                                                          |                                                                | Overall survival ER positive                        | ≥80 cm vs. < 80 cm | 1.61 (0.94 - 2.75)  |                                                                                                             |
|                                                                                                                |                                                                            |                                                 |                                                                                                                                                                          |                                                                | Overall survival ER negative                        | ≥80 cm vs. < 80 cm | 3.54 (0.83-15.22)   |                                                                                                             |
|                                                                                                                |                                                                            |                                                 |                                                                                                                                                                          |                                                                | Overall survival Radiotherapy treated               | ≥80 cm vs. < 80 cm | 1.79 (0.93-3.45)    |                                                                                                             |
|                                                                                                                |                                                                            |                                                 |                                                                                                                                                                          |                                                                | Overall survival Tamoxifen treated                  | ≥80 cm vs. < 80 cm | 2.07 (0.96-4.45)    |                                                                                                             |
|                                                                                                                |                                                                            |                                                 |                                                                                                                                                                          |                                                                | Overall survival Chemo naive                        | ≥80 cm vs. < 80 cm | 1.90 (1.09-3.31)    |                                                                                                             |
|                                                                                                                |                                                                            |                                                 |                                                                                                                                                                          |                                                                | Breast cancer recurrence (n=162)                    | ≥80 cm vs. < 80 cm | 1.70 (1.14 - 2.54 ) | Age, Tumour size, lymph node involvement, histological grade, ER status, alcohol intake, smoking, Treatment |
|                                                                                                                |                                                                            |                                                 |                                                                                                                                                                          |                                                                | Breast cancer recurrence (n=144)                    | ≥80 cm vs. < 80 cm | 1.45 (0.89-2.38)    | Above factors + BMI                                                                                         |
|                                                                                                                |                                                                            |                                                 |                                                                                                                                                                          |                                                                | Breast cancer recurrence (n=129.0)<br>Age ≥50 years | ≥80 cm vs. < 80 cm | 2.00 (1.20-3.34)    | Age, Tumour size, lymph node involvement, histological grade, ER status                                     |
|                                                                                                                |                                                                            |                                                 |                                                                                                                                                                          |                                                                | Breast cancer recurrence (n=129.0)<br>ER positive   | ≥80 cm vs. < 80 cm | 2.09 (0.71 - 6.12)  |                                                                                                             |



| Author, year, study name, country                                     | Study description                                    | Time of diagnosis and follow-up                | Disease characteristics treatment                                                                                                                                                                                                                                                                  | Exposure assessment                                                           | Outcome (Events)                                                              | Contrast                                  | RR (95% CI)                                  | Covariates                                                                                                     |
|-----------------------------------------------------------------------|------------------------------------------------------|------------------------------------------------|----------------------------------------------------------------------------------------------------------------------------------------------------------------------------------------------------------------------------------------------------------------------------------------------------|-------------------------------------------------------------------------------|-------------------------------------------------------------------------------|-------------------------------------------|----------------------------------------------|----------------------------------------------------------------------------------------------------------------|
|                                                                       |                                                      |                                                |                                                                                                                                                                                                                                                                                                    |                                                                               | Breast cancer recurrence (n=33.0)<br>ER negative                              | ≥80 cm vs. < 80 cm                        | 1.46 (0.95 - 2.24)                           |                                                                                                                |
|                                                                       |                                                      |                                                |                                                                                                                                                                                                                                                                                                    |                                                                               | Breast cancer recurrence(n=129.0)<br>Age ≥50 years<br>ER positive             | ≥80 cm vs. < 80 cm                        | 2.07 (0.96-4.45)                             |                                                                                                                |
|                                                                       |                                                      |                                                |                                                                                                                                                                                                                                                                                                    |                                                                               | Breast cancer recurrence<br>Radiotherapy naive                                | ≥80 cm vs. < 80 cm                        | 2.35 (1.22-4.53)                             |                                                                                                                |
|                                                                       |                                                      |                                                |                                                                                                                                                                                                                                                                                                    |                                                                               | Breast cancer recurrence<br>Chemo naive                                       | ≥80 cm vs. < 80 cm                        | 1.55 (0.98-2.45)                             |                                                                                                                |
|                                                                       |                                                      |                                                |                                                                                                                                                                                                                                                                                                    |                                                                               | Breast cancer recurrence<br>ER+ and ≥50 years<br>Aromatase inhibitors treated | ≥80 cm vs. < 80 cm                        | 2.82 (0.99-8.04)                             |                                                                                                                |
|                                                                       |                                                      |                                                |                                                                                                                                                                                                                                                                                                    |                                                                               | Breast cancer recurrence<br>ER+ and ≥50 years<br>Tamoxifen treated            | ≥80 cm vs. < 80 cm                        | 2.05 (1.01-4.15)                             |                                                                                                                |
| Chen HL, 2016 <sup>151</sup> , China<br><br>WC – Included, review     | Retrospective cohort (n= 206), mean age:48.5         | Follow up= 59 months                           | AJCC stage I to III TNBC (triple negative breast cancer) The majority of the study population who received adjuvant/neoadjuvant chemotherapy received an anthracycline- based regimen (96.1 %); doxorubicin plus cyclophosphamide followed by a taxane was the most frequent regimen administered. | Before Chemotherapy<br>Waist circumference, from medical records at diagnosis | Overall survival (n=38)<br><br>Disease-free survival (n=52)                   | >80cm vs. ≤80cm cm<br><br>>80cm vs. ≤80cm | 2.30 (1.18 - 4.46)<br><br>1.76 (1.00 - 3.07) | Nodal status, Tumour stage, Lymphovascular invasion<br><br>Nodal status, Tumour stage, Lymphovascular invasion |
| Berrino F, 2014 <sup>143</sup> , Diet and Androgen-5 (DIANA-5), Italy | Secondary analysis of a lifestyle intervention trial | Follow up= 2.8 years, Calendar year: 2008-2012 | Invasive breast cancer Stage I 46.1%, IIa 29.1%, ≥IIb 24.8%                                                                                                                                                                                                                                        | Measured waist circumference, average 1.74 years post-diagnosis               | Breast cancer recurrence (n=419)                                              | ≥85 cm vs. < 85 cm                        | 1.18 (0.82 - 1.7)                            | Age, education, stage at diagnosis, ER status                                                                  |

| Author, year, study name, country                                                                                               | Study description                                                                                                                                                                                                 | Time of diagnosis and follow-up               | Disease characteristics treatment                                                                                                                                                                                                                   | Exposure assessment                                                                                                                                                                                                                                                  | Outcome (Events)                                                         | Contrast                                                   | RR (95% CI)                                                                         | Covariates                                                                                                                                                                                                                                                                                                                                                                                                                                                                  |
|---------------------------------------------------------------------------------------------------------------------------------|-------------------------------------------------------------------------------------------------------------------------------------------------------------------------------------------------------------------|-----------------------------------------------|-----------------------------------------------------------------------------------------------------------------------------------------------------------------------------------------------------------------------------------------------------|----------------------------------------------------------------------------------------------------------------------------------------------------------------------------------------------------------------------------------------------------------------------|--------------------------------------------------------------------------|------------------------------------------------------------|-------------------------------------------------------------------------------------|-----------------------------------------------------------------------------------------------------------------------------------------------------------------------------------------------------------------------------------------------------------------------------------------------------------------------------------------------------------------------------------------------------------------------------------------------------------------------------|
| WC – Included, review                                                                                                           | (n= 2092) , mean age: 51.4 years<br>419 cases with metabolic syndrome                                                                                                                                             |                                               |                                                                                                                                                                                                                                                     | before chemotherapy<br><br>Waist circumference                                                                                                                                                                                                                       |                                                                          |                                                            |                                                                                     |                                                                                                                                                                                                                                                                                                                                                                                                                                                                             |
| George SM, 2014 <sup>71</sup> , Health, Eating, Activity, and Lifestyle study (HEALS), USA<br><br>WC – Included, meta-analysis  | Prospective cohort of cancer survivors (n= 621)<br>Pre- and postmenopausal, Multi-ethnic                                                                                                                          | Follow up= 9.5 years                          | Invasive early stage breast cancer                                                                                                                                                                                                                  | Around 30-month post-diagnosis, anthropometric measurements were conducted by trained staff using a standardized protocol. After chemotherapy<br>Waist circumference                                                                                                 | All-cause mortality(n=107)<br><br>Breast cancer-specific mortality(n=48) | 99.1-150 vs. 59.4-79.5 cm<br><br>99.1-150 vs. 59.4-79.5 cm | 2.99 (1.14 - 7.86)<br><br>P trend=0.033<br><br>2.69 (0.69 - 12.01)<br>P trend=0.145 | Age as underlying time metric in Cox regression model, Treatment, number of activity-limiting comorbidities, Race, healthy eating index, post diagnosis recreational physical activity, BMI                                                                                                                                                                                                                                                                                 |
| Kwan ML, 2014 <sup>304</sup> , The California Breast Cancer Survivorship Consortium (CBCSC), United States<br><br>WC - Excluded | Pooled analysis of 3 case-control (AABCS, SFBCS, CARE), and 3 prospective cohort studies (LACE, MEC, CTS) (n= 11351)<br>Analysis included 4 studies with data.<br>Pre and Post-menopausal<br>Mean age: 60.2 years | Follow up= 11 years, Calendar year: 1993-2007 | AJCC stage:<br>I: 48.8%;<br>II: 40.5%;<br>III: 5.7%;<br>IV: 1.7%<br>Unknown: 3.3%<br>ER and/or PR+: 69.3%<br>ER- and PR-: 16%<br>Unknown: 14.8%<br>Breast conserving: 55.5%<br>Mastectomy: 42.1%<br>Chemotherapy: 40.8%<br>Radiation therapy: 51.7% | Self-reported or measured, average 1.7 years post-diagnosis in AABCS, SFBCS<br>LACE; average 3.8 years pre-diagnosis in 80% of CTS and 0.9 years post-diagnosis in 20% of CTS; no data in CARE and MEC<br><br>Waist circumference ascertained pre- or post-diagnosis | All-cause mortality (n=1531)<br><br>Breast cancer mortality (n=757)      | ≥37.1 vs. <29.8 cm<br><br>≥37.1 vs. <29.8 cm               | 1.06 (0.86 - 1.32)<br><br>P trend = 0.09<br><br>1.20 (0.88-1.63)<br>P trend = 0.12  | Age at breast cancer diagnosis, log age at breast cancer diagnosis, cancer stage, race/ethnicity, education, neighbourhood socioeconomic status, place of birth, marital status, menopausal status, age at first birth, history of smoking, alcohol intake, hormone receptor status, nodal positivity , tumour grade, tumour size, prior cancer history, surgery type, chemotherapy, radiation therapy, hormonal therapy, comorbidity, pre-diagnosis BMI, indicator of pre- |

| Author, year, study name, country                                                                                                          | Study description                                                                                                                                                                                  | Time of diagnosis and follow-up                                                                   | Disease characteristics treatment                                                                                                                                                                                                                                       | Exposure assessment                                                                         | Outcome (Events)                                                               | Contrast                | RR (95% CI)                                        | Covariates                                                                                        |
|--------------------------------------------------------------------------------------------------------------------------------------------|----------------------------------------------------------------------------------------------------------------------------------------------------------------------------------------------------|---------------------------------------------------------------------------------------------------|-------------------------------------------------------------------------------------------------------------------------------------------------------------------------------------------------------------------------------------------------------------------------|---------------------------------------------------------------------------------------------|--------------------------------------------------------------------------------|-------------------------|----------------------------------------------------|---------------------------------------------------------------------------------------------------|
|                                                                                                                                            |                                                                                                                                                                                                    |                                                                                                   |                                                                                                                                                                                                                                                                         |                                                                                             |                                                                                |                         |                                                    | diagnosis vs post-diagnosis waist-hip ratio, weight-height ratio, or waist circumference          |
| Williams PT, 2014 <sup>17</sup> , National Runners' and Walkers' Health Surveys (NRWHS), United States<br><br>WC – Included, meta-analysis | Population-based study (n= 986)<br>Pre- and postmenopausal Runners (n= 272) or walkers (n= 714)<br>Caucasian<br>90.35%-100%                                                                        | Follow up= 9.1 years, Calendar year: 1998-2001                                                    | Self-reported breast cancer, no other clinical and pathological information                                                                                                                                                                                             | Self-reported in questionnaire, average 7.9 years post-diagnosis<br><br>Waist circumference | Breast cancer-specific mortality(n=46)                                         | Per 1 cm                | 1.014 (0.982 - 1.045)                              | Age, Race, Exercise                                                                               |
|                                                                                                                                            |                                                                                                                                                                                                    |                                                                                                   |                                                                                                                                                                                                                                                                         | Hip circumference                                                                           | Breast cancer-specific mortality(n=46)                                         | Per 1 cm                | 1.013 (0.979-1.044)                                |                                                                                                   |
| Goodwin PJ, 2012 <sup>22</sup> , Toronto, Canada<br><br>WC – Included, meta-analysis (mortality) Review (recurrence)                       | Prospective cohort study of cancer survivors (n= 535), pre- and postmenopausal, mean age: 50.3 years, Multi-ethnic<br>Excluded women with serious coexisting medical conditions including diabetes | Follow up= 12.1 years, 4.3% loss to follow-up, Calendar year: 1989-1996                           | Invasive breast cancer<br>T1 55.5%, T2 32.5%, T3 5%, Tx 6.9%<br>N0 69.2%, N1 30.8%<br>M0<br>ER+ 67.7%<br>ER- 18.7%<br>Unknown 13.6%<br>PR+ 61.7%<br>PR- 23.4%<br>Unknown 15%<br>Mastectomy: 22.8%<br>Lumpectomy: 77.2%<br>Chemotherapy: 39.8%<br>Hormone therapy: 39.1% | Measured Waist circumference before chemotherapy                                            | Overall survival (n=134)                                                       | 88.5-123.5 vs. 73-79 cm | 1.12 (0.78 - 1.61)                                 | Age, Tumour stage, Tumour grade, Hormone receptor status, Adjuvant chemotherapy, Hormonal therapy |
|                                                                                                                                            |                                                                                                                                                                                                    |                                                                                                   |                                                                                                                                                                                                                                                                         | Waist circumference                                                                         | Distant disease free(n=134)                                                    | 88.5-123.5 vs. 59-73 cm | 0.95 (0.63 - 1.42)                                 |                                                                                                   |
|                                                                                                                                            |                                                                                                                                                                                                    |                                                                                                   |                                                                                                                                                                                                                                                                         | Hip circumference                                                                           | Overall survival (n=134)                                                       | 166 vs. 107 cm          | 1.12 (0.80 - 1.55)                                 |                                                                                                   |
| Markkula A, 2012 <sup>31</sup> , Swedish Cohort, Sweden<br><br>WC - Excluded                                                               | Prospective cohort of cancer survivors (n= 772)<br>Mean age: 60.4 years                                                                                                                            | Follow up= 2.94 years for disease-free survival, Loss to follow-up 9.2%, Calendar year: 2002-2010 | In situ:28 Invasive:739 ER+ 86.8%, PR+ 69.3%<br>Histological grade: I 25%, II 50%, III 25%                                                                                                                                                                              | Waist circumferences measured at the preoperative visit. Before chemotherapy                | Disease-free survival (n =62)<br><br>Distant metastasis-free survival (n = 40) | ≥80 vs. <80 cm          | P log rank test=0.042<br><br>P log rank test=0.088 | Unadjusted                                                                                        |

| Author, year, study name, country                                                                                                            | Study description                                                                                               | Time of diagnosis and follow-up                                      | Disease characteristics treatment                                                                                                                                                                                                                                                                                                                                                                           | Exposure assessment                                                                                  | Outcome (Events)                                    | Contrast           | RR (95% CI)                          | Covariates                                                                                                                                                     |
|----------------------------------------------------------------------------------------------------------------------------------------------|-----------------------------------------------------------------------------------------------------------------|----------------------------------------------------------------------|-------------------------------------------------------------------------------------------------------------------------------------------------------------------------------------------------------------------------------------------------------------------------------------------------------------------------------------------------------------------------------------------------------------|------------------------------------------------------------------------------------------------------|-----------------------------------------------------|--------------------|--------------------------------------|----------------------------------------------------------------------------------------------------------------------------------------------------------------|
| Abrahamson, 2006 <sup>39</sup> , Atlanta, Seattle, New Jersey<br>Follow-up Study, United States<br><br>WC – Included, meta-analysis          | Follow-up of cases of a population-based case-control study (n= 1254) Pre- and postmenopausal age range: 20-54  | Diagnosis 1990-2000, Follow up= 9.8 years                            | Invasive:1254 56% ER+ve, 35%ER-ve, 3% borderline, 6% unknown Invasive breast cancer; AJCC; any stage; 57% local, 40% regional, 3% distant                                                                                                                                                                                                                                                                   | Measured at interview, 4.2months post-diagnosis before chemotherapy                                  | Record linkage with National Death index            | ≥88 cm vs. < 80 cm | 1.86 (1.4 - 2.46)<br>P trend <0.0001 | Tumour stage, Income                                                                                                                                           |
|                                                                                                                                              |                                                                                                                 |                                                                      |                                                                                                                                                                                                                                                                                                                                                                                                             |                                                                                                      | Overall mortality (n=228)                           |                    |                                      |                                                                                                                                                                |
|                                                                                                                                              |                                                                                                                 |                                                                      |                                                                                                                                                                                                                                                                                                                                                                                                             | Waist circumference Superior to the iliac crest of the pelvis, usually at the level of the umbilicus | Overall mortality (n=228)                           | ≥88 cm vs. < 80 cm | 1.75 (1.20-2.55)<br>P trend =0.03    | Above factors + BMI                                                                                                                                            |
|                                                                                                                                              |                                                                                                                 |                                                                      |                                                                                                                                                                                                                                                                                                                                                                                                             |                                                                                                      | Hip circumference Maximum extension of the buttocks |                    |                                      |                                                                                                                                                                |
| Tao MH, 2006 <sup>112</sup> , Shanghai Breast Cancer Study (SBCS), China<br><br>WC – Included, meta-analysis (mortality) Review (recurrence) | Follow-up of cases of a population-based case-control study (n= 1455) Pre- and postmenopausal, age range: 25-64 | Diagnosis: 1996-1998 Follow up= 5.1 years, calendar year: Until 2002 | 44.4% ER+ve, 25.5% ER-ve, 30.0% unknown; 43.5% PR+ve, 25.2% PR-ve, 31.1% unknown Primary breast cancer; TNM; 24.6% Stage 0-I, 34.9% stage IIA, 21.9% stage IIB, 11.3% stage III-IV, 7.1% unknown Surgery: 99%; Adjuvant chemotherapy: 94% ; adjuvant chemotherapy and traditional Chinese medicine: 63%; radiotherapy: 38.9% yes, 47.4% no, 13.6% unknown; tamoxifen use: 63.2% yes, 18.0 no, 18.6% unknown | Waist circumferences measured at or soon after diagnosis                                             | Self-reported, record linkage with death registry   | ≥84 cm vs. < 72 cm | 1.2 (0.8 - 1.7)<br><br>P trend=0.24  | Age at diagnosis, education, menopausal status, Tumour stage, chemotherapy, Tamoxifen use, radiotherapy, oestrogen receptor level, progesterone receptor level |
|                                                                                                                                              |                                                                                                                 |                                                                      |                                                                                                                                                                                                                                                                                                                                                                                                             |                                                                                                      | Overall survival (n=240)                            |                    |                                      |                                                                                                                                                                |
|                                                                                                                                              |                                                                                                                 |                                                                      |                                                                                                                                                                                                                                                                                                                                                                                                             |                                                                                                      | Disease-free survival (n=298)                       | ≥84 cm vs. < 72 cm | 1.2 (0.9 - 1.7)<br><br>P trend=0.35  |                                                                                                                                                                |

**Supplementary Table S6 Description of studies included in or excluded from the descriptive review or meta-analysis of waist-to-hip ratio (WHR)**

| Author, year, study name, country                                                                                                                                   | Study description                                                                                          | Time of diagnosis and follow-up                 | Disease characteristics treatment                                                                                                                                                                                                                    | Exposure assessment                           | Outcome (Events)                                                            | Contrast                                  | RR (95% CI)                                              | Covariates                                                        |
|---------------------------------------------------------------------------------------------------------------------------------------------------------------------|------------------------------------------------------------------------------------------------------------|-------------------------------------------------|------------------------------------------------------------------------------------------------------------------------------------------------------------------------------------------------------------------------------------------------------|-----------------------------------------------|-----------------------------------------------------------------------------|-------------------------------------------|----------------------------------------------------------|-------------------------------------------------------------------|
| Bandera EV, 2021 <sup>118</sup> , Women's Circle of Health Study and the Women's Circle of Health Follow-Up Study (WCHFS), USA<br><br>WHR – Included, meta-analysis | Population based cohort (n=1891), mean age:54.5, Pre-menopausal 39%, post-menopausal 61%, African American | Diagnosed:2005-2020 follow Up: median 5.9 years | Ductal carcinoma in situ or invasive breast cancer. Stage 0 18%, I 36%, II 32%, III 10%, IV 2%. ER positive 70%, negative 27%, missing 3%. No surgery 3%, lumpectomy 51%, mastectomy 46%. Chemotherapy 55%. Radiotherapy 68%. Endocrine therapy 64%. | Measured 2005-February 2020 to September 2020 | All-cause mortality (n=274.0)                                               | 0.951 vs 0.65<br>Per 5 unit               | 1.61 (1.12-2.33)<br>P trend=0.03<br>1.29 (1.11-1.50)     | Age, income, smoking, tumor stage, tumor subtype, type of surgery |
|                                                                                                                                                                     |                                                                                                            |                                                 |                                                                                                                                                                                                                                                      |                                               | Premenopausal All-cause mortality (n=102.0)                                 | 0.951 vs 0.65<br>Per 5 unit               | 1.14 (0.67-1.96)<br>1.03 (0.79-1.34)<br>P trend=0.03     |                                                                   |
|                                                                                                                                                                     |                                                                                                            |                                                 |                                                                                                                                                                                                                                                      |                                               | Postmenopausal All-cause mortality (n=172.0)                                | 0.951 vs 0.65<br>Per 5 unit               | 2.15 (1.28-3.61)<br>1.47 (1.22-1.77)<br>P trend=0.02     |                                                                   |
|                                                                                                                                                                     |                                                                                                            |                                                 |                                                                                                                                                                                                                                                      |                                               | ER positive All-cause mortality (n=167.0)                                   | 0.951 vs 0.65<br>Per 5 unit               | 1.38 (0.89-2.15)<br>1.29 (1.06-1.57)<br>P trend=0.03     |                                                                   |
|                                                                                                                                                                     |                                                                                                            |                                                 |                                                                                                                                                                                                                                                      |                                               | ER negative All-cause mortality (n=103.0)                                   | 0.951 vs 0.65<br>Per 5 unit               | 2.24 (1.14-4.41)<br>1.31 (1.03-1.66)<br>0.90 (0.65-1.25) |                                                                   |
|                                                                                                                                                                     |                                                                                                            |                                                 |                                                                                                                                                                                                                                                      |                                               | Age <=45y All-cause mortality (n=66)                                        |                                           |                                                          |                                                                   |
|                                                                                                                                                                     |                                                                                                            |                                                 |                                                                                                                                                                                                                                                      |                                               | Age 46-59y All-cause mortality (n=118)                                      |                                           | 1.25 (0.97-1.60)                                         |                                                                   |
|                                                                                                                                                                     |                                                                                                            |                                                 |                                                                                                                                                                                                                                                      |                                               | Age >=60 All-cause mortality (n=90)                                         |                                           | 1.76 (1.37-2.26)                                         |                                                                   |
|                                                                                                                                                                     |                                                                                                            |                                                 |                                                                                                                                                                                                                                                      |                                               | Breast cancer-specific mortality (n=168.0)                                  | 0.951 vs 0.65<br>Per 5 unit               | 1.68 (1.04-2.71)<br>1.19 (0.99-1.44)                     |                                                                   |
|                                                                                                                                                                     |                                                                                                            |                                                 |                                                                                                                                                                                                                                                      |                                               | Tryggvadottir H, 2019 <sup>240</sup> , Sweden<br><br>WHR – Included, review | Prospective cohort (n=1178) mean age:61.5 | Diagnosed:2002-2014, follow Up: Maximum 13 years         |                                                                   |
| Recurrence                                                                                                                                                          |                                                                                                            | P trend=0.013                                   | Unadjusted                                                                                                                                                                                                                                           |                                               |                                                                             |                                           |                                                          |                                                                   |

|                                                                                                                                                                        |                                                                                                                                                                                               |                                                                                          |                                                                                                                                                                                                                                               |                                                                                                                                    |                                                    |                             |                                         |                                                                                                                                       |
|------------------------------------------------------------------------------------------------------------------------------------------------------------------------|-----------------------------------------------------------------------------------------------------------------------------------------------------------------------------------------------|------------------------------------------------------------------------------------------|-----------------------------------------------------------------------------------------------------------------------------------------------------------------------------------------------------------------------------------------------|------------------------------------------------------------------------------------------------------------------------------------|----------------------------------------------------|-----------------------------|-----------------------------------------|---------------------------------------------------------------------------------------------------------------------------------------|
| Bao PP, 2016 <sup>42</sup> ,<br>Shanghai Breast<br>Cancer Survival<br>Study (SBCSS),<br>China<br><br>WHR – Excluded<br>(mortality)<br>Included, review<br>(recurrence) | Prospective cohort<br>study of cancer<br>survivors<br>(n= 518)<br>53.09%<br>postmenopausal<br>Mean age:53.4 years<br>80% response rate<br>6.51 months from<br>diagnosis to study<br>enrolment | Follow up= 9.1 years,<br>10-year post-diagnosis<br>survey completed for<br>55% survivors | Triple-negative breast<br>cancer<br>Stage (%): I: 30.89%;<br>II: 55.60%; III: 10.23%;<br>Unknown: 3.28%<br>Mastectomy: 95.56 %<br>Chemotherapy: 94.40<br>% Radiotherapy:<br>27.41 %<br>Immunotherapy:<br>17.76 %<br>Tamoxifen use: 21.62<br>% | Waist and hip<br>circumferences were<br>measured<br>at diagnosis by<br>trained interviewers<br>according to a<br>standard protocol | All-cause<br>mortality(n=128)                      | $\geq 0.87$ vs.<br>$< 0.87$ | 0.93 (0.56 - 1.54)<br>P trend=0.89      | Age at diagnosis,<br>education,<br>menopausal status,<br>Exercise, type of<br>surgery,<br>chemotherapy,<br>radiotherapy, TNM<br>stage |
|                                                                                                                                                                        |                                                                                                                                                                                               |                                                                                          |                                                                                                                                                                                                                                               |                                                                                                                                    | Recurrence/ breast<br>cancer mortality (n=<br>112) |                             | 1.11 (0.64-1.91)<br>P trend=0.83        |                                                                                                                                       |
| Shariff-Marco S,<br>2015 <sup>107</sup><br>Neighborhoods                                                                                                               | Prospective cohort<br>study of cancer<br>survivors                                                                                                                                            | Follow up= 7.4 years                                                                     | Invasive breast cancer<br>Mainly ER+ or PR+<br>AJCC stage at                                                                                                                                                                                  | Waist and hip<br>circumference<br>measured at                                                                                      | All-cause mortality<br>(n=489)                     | $\geq 0.87$ vs.<br>$< 0.77$ | 1.65 (1.20 - 2.26)<br>P trend= $< 0.01$ |                                                                                                                                       |

|                                                                                                                                                                                                             |                                                                                                                                                         |                                                 |                                                                                                                                                    |                                                                                                                                              |                                          |                 |                                        |                                                                                                                                                                                                                                                                                                                                                                                                                                                                                                                                                                                                      |
|-------------------------------------------------------------------------------------------------------------------------------------------------------------------------------------------------------------|---------------------------------------------------------------------------------------------------------------------------------------------------------|-------------------------------------------------|----------------------------------------------------------------------------------------------------------------------------------------------------|----------------------------------------------------------------------------------------------------------------------------------------------|------------------------------------------|-----------------|----------------------------------------|------------------------------------------------------------------------------------------------------------------------------------------------------------------------------------------------------------------------------------------------------------------------------------------------------------------------------------------------------------------------------------------------------------------------------------------------------------------------------------------------------------------------------------------------------------------------------------------------------|
| and Breast Cancer (NABC), (San Francisco Bay Area Breast Cancer Study (SFBCS), Northern California site of the Breast Cancer Family Registry (NC-BCFR)), United States<br><br>WHR – Included, meta-analysis | (n= 4347)<br>Pre and Post-menopausal<br>Age range: 18-64 years                                                                                          |                                                 | diagnosis: I to IV and unknown Type of surgery: None, lumpectomy, mastectomy, unknown<br>Chemotherapy: No, yes, unknown<br>Radiation: No, yes      | interview in SFBCS (average 21 months after diagnosis)                                                                                       | Breast cancer-specific mortality (n=267) | ≥0.87 vs. <0.77 | 1.62 (1.06 - 2.48)<br><br>P trend=0.03 | Age at diagnosis, year of diagnosis, race/ethnicity, Histology , histological grade, ERPR status, first subsequent primary tumour, time to first subsequent primary tumour, type of surgery, chemotherapy, radiation therapy, Marital status, education, History of benign breast disease, menopausal status, age at menarche, number of full-term pregnancies, breastfeeding, years since last full-term pregnancy, History of hormonal contraception use, history of menopausal hormone therapy use, recent recreational physical activity, alcohol intake, stratified by study, pre-diagnosis BMI |
| Sun X, 2015 <sup>109</sup> , Carolina Breast Cancer Study (CBCS), USA<br><br>WHR – Included, meta-analysis                                                                                                  | Follow-up of cases in case-control study (n= 1109)<br>Pre- (49%) and postmenopausal (51%)<br>Mean age: 50.60 years<br>White 55%<br>African-American 45% | Follow up= 13.5 years, Calendar year: 1993-2001 | Invasive breast cancer Stage I 37%, II 50%, III-IV 12%<br>Luminal 64%<br>Basal-like 18%<br>HER2+ 6%<br>Normal-like 11%<br>No treatment information | Waist circumference, hip circumference, height, and body weight were measured by trained nurses at interview average 145 days post-diagnosis | Overall survival (n=442)                 | ≥0.84 vs. <0.77 | 1.25 (0.91 - 1.72)                     | Age, race, study phase, income, education, physical activity, alcohol intake, smoking, parity, tumour stage, tumour size, lymph node status, histological type                                                                                                                                                                                                                                                                                                                                                                                                                                       |
|                                                                                                                                                                                                             |                                                                                                                                                         |                                                 |                                                                                                                                                    |                                                                                                                                              | Overall survival (n=84) Basal-like       | ≥0.84 vs. <0.77 | 0.87 (0.39-1.93)                       |                                                                                                                                                                                                                                                                                                                                                                                                                                                                                                                                                                                                      |
|                                                                                                                                                                                                             |                                                                                                                                                         |                                                 |                                                                                                                                                    |                                                                                                                                              | Overall survival (n=278) Luminal         | ≥0.84 vs. <0.77 | 1.33 (0.89-1.97)                       |                                                                                                                                                                                                                                                                                                                                                                                                                                                                                                                                                                                                      |
|                                                                                                                                                                                                             |                                                                                                                                                         |                                                 |                                                                                                                                                    |                                                                                                                                              | Breast cancer-specific mortality(n=273)  | ≥0.84 vs. <0.77 | 0.91 (0.62 - 1.34)                     |                                                                                                                                                                                                                                                                                                                                                                                                                                                                                                                                                                                                      |

|                                                                                                                                 |                                                                                      |                                                                                  |                                     |                                                                                                                           |                                                   |                           |                                     |                                                                                                                                                                                             |
|---------------------------------------------------------------------------------------------------------------------------------|--------------------------------------------------------------------------------------|----------------------------------------------------------------------------------|-------------------------------------|---------------------------------------------------------------------------------------------------------------------------|---------------------------------------------------|---------------------------|-------------------------------------|---------------------------------------------------------------------------------------------------------------------------------------------------------------------------------------------|
|                                                                                                                                 |                                                                                      |                                                                                  |                                     |                                                                                                                           | Breast cancer-specific mortality(n=61) Basal-like | ≥0.84 vs. <0.77           | 0.94 (0.37- 2.41)                   |                                                                                                                                                                                             |
|                                                                                                                                 |                                                                                      |                                                                                  |                                     |                                                                                                                           | Breast cancer-specific mortality(n=152) Luminal   | ≥0.84 vs. <0.77           | 0.82 (0.50- 1.36)                   |                                                                                                                                                                                             |
|                                                                                                                                 |                                                                                      |                                                                                  |                                     |                                                                                                                           | Overall survival (n=442)                          | ≥0.84 vs. <0.77           | 1.44 (1.04-1.99)                    | Age, race, study phase, income, education, physical activity, alcohol intake, smoking, parity, BMI                                                                                          |
|                                                                                                                                 |                                                                                      |                                                                                  |                                     |                                                                                                                           | Overall survival (n=84) Basal-like                | ≥0.84 vs. <0.77           | 0.52 (0.22-1.23)                    |                                                                                                                                                                                             |
|                                                                                                                                 |                                                                                      |                                                                                  |                                     |                                                                                                                           | Overall survival (n=278) Luminal                  | ≥0.84 vs. <0.77           | 1.79 (1.20-2.68)                    |                                                                                                                                                                                             |
|                                                                                                                                 |                                                                                      |                                                                                  |                                     |                                                                                                                           | Breast cancer-specific mortality(n=273)           | ≥0.84 vs. <0.77           | 1.12 (0.76-1.64)                    |                                                                                                                                                                                             |
|                                                                                                                                 |                                                                                      |                                                                                  |                                     |                                                                                                                           | Breast cancer-specific mortality(n=61) Basal-like | ≥0.84 vs. <0.77           | 0.64 (0.24-1.74)                    |                                                                                                                                                                                             |
|                                                                                                                                 |                                                                                      |                                                                                  |                                     |                                                                                                                           | Breast cancer-specific mortality(n=152) Luminal   | ≥0.84 vs. <0.77           | 1.21 (0.73-2.08)                    |                                                                                                                                                                                             |
|                                                                                                                                 |                                                                                      |                                                                                  |                                     |                                                                                                                           |                                                   |                           |                                     |                                                                                                                                                                                             |
| George SM, 2014 <sup>71</sup> , Health, Eating, Activity, and Lifestyle study (HEALS), USA<br><br>WHR – Included, meta-analysis | Prospective cohort of cancer survivors (n= 621) Pre- and postmenopausal Multi-ethnic | Follow up= 9.5 years                                                             | Invasive early stage breast cancer  | Around 30-month post-diagnosis, anthropometric measurements were conducted by trained staff using a standardized protocol | All-cause mortality(n=107)                        | 0.88-1.04 vs. 0.64 – 0.77 | 2.1 (1.08 - 4.05)<br>P trend=0.028  | Age as underlying time metric in Cox regression model, Treatment, number of activity-limiting comorbidities, Race, healthy eating index, post diagnosis recreational physical activity, BMI |
|                                                                                                                                 |                                                                                      |                                                                                  |                                     |                                                                                                                           | Breast cancer-specific mortality(n=48)            | 0.88-1.04 vs. 0.64 – 0.77 | 4.02 (1.31 -12.31)<br>P trend=0.029 |                                                                                                                                                                                             |
| Chen Y, 2013 <sup>397</sup> , Shanghai Breast Cancer Survival Study (SBCSS), China<br><br>WHR - Excluded                        | Prospective cohort (n=4842) mean age:53.3, Pre and postmenopausal, Chinese           | Diagnosed:2002-2006 follow Up: Median 5.3 years, Loss to Follow-up: Not reported | Primary breast cancer. Stage 0-III. | FFQ Measured 2002-2006 until 2011                                                                                         | Breast cancer recurrence (n=720)                  |                           | P interaction 0.05-0.65             | Age at diagnosis, comorbidity, education, er/pr status, marital status, number of parity, quality of life, tnm stage, treatment                                                             |



|                                                                                                                        |                                                                                                                                        |                                                                                                        |                                                                                                                                                                                                                                                                     |                                                                                                                                                         |                                                                                                                                   |                                                               |                                                                                                                                                                          |                                                                                                                                                                                                                                                                                                                                                   |
|------------------------------------------------------------------------------------------------------------------------|----------------------------------------------------------------------------------------------------------------------------------------|--------------------------------------------------------------------------------------------------------|---------------------------------------------------------------------------------------------------------------------------------------------------------------------------------------------------------------------------------------------------------------------|---------------------------------------------------------------------------------------------------------------------------------------------------------|-----------------------------------------------------------------------------------------------------------------------------------|---------------------------------------------------------------|--------------------------------------------------------------------------------------------------------------------------------------------------------------------------|---------------------------------------------------------------------------------------------------------------------------------------------------------------------------------------------------------------------------------------------------------------------------------------------------------------------------------------------------|
| Chen X, 2010 <sup>55</sup> , Shanghai Breast Cancer Survival Study (SBCSS), China<br><br>WHR – Included, meta-analysis | Prospective cohort study of cancer survivors (n= 5042)<br>Pre- and postmenopausal (51.1%)<br>Mean age: 53.5 years<br>Response rate 80% | Average 6.5 months from diagnosis to study enrolment<br>Follow up= 46 months, Calendar year: 2002-2006 | Invasive and in situ breast cancer<br>Stage 0-I 36.4%<br>IIA 32.6%,<br>IIB 16.6%,<br>III-IV 9.8%<br>ER+/PR+ 49.9%<br>ER-/PR- 27.6%<br>ER+/PR- or ER-/PR+ 20.4%<br>Mastectomy 93.9%<br>Chemotherapy 91.2%<br>Radiotherapy 32.1%<br>Tamoxifen: 52%<br>Comorbidity 20% | Anthropometric measurements were taken twice according to a standard protocol by trained interviewers at the baseline interview 6 months post diagnosis | Total mortality (n=442)                                                                                                           | ≥0.87 vs. <0.77                                               | 1.22 (0.91 - 1.63)<br>P trend = 0.057                                                                                                                                    | Age at diagnosis, education, Income, Marital status, Comorbidity, Exercise, Meat intake, Cruciferous vegetables, Soy protein, Time from diagnosis to randomization, menopausal status, Menopausal symptoms, chemotherapy, Surgery type, radiotherapy, Tamoxifen use, Receptor status, Nodal status, Immunotherapy, BMI at 6 months post-diagnosis |
|                                                                                                                        |                                                                                                                                        |                                                                                                        |                                                                                                                                                                                                                                                                     |                                                                                                                                                         | Relapse/disease-specific mortality (n=481)                                                                                        | ≥0.87 vs. <0.77                                               | 1.17 (0.88 - 1.56)<br>P trend = 0.226<br><br>In text: WHR was not significantly related to mortality with or without adjustment for BMI in pre- or post-menopausal women |                                                                                                                                                                                                                                                                                                                                                   |
| Dal Maso L, 2008 <sup>60</sup> , Six Italian Regions Follow-up Study, Italy<br><br>WHR – Included, meta-analysis       | Follow-up of cases of a case-control study (n= 1453)<br>Pre- and postmenopausal Mean age:55 years                                      | Follow up= 12.6 years, Calendar year: 1991-1994                                                        | Invasive breast cancer<br>Stage I 475 cases<br>II 642 cases<br>III-IV 193 cases<br>Unknown 143 cases<br>ER+PR+ 603 cases<br>ER-PR+ 52 cases<br>ER+PR- 92 cases<br>ER-PR- 147 cases<br>Unknown 559 cases                                                             | Measured waist (2 cm above the umbilicus), and hip (maximal Protrusion) in women diagnosed no longer than a year before interview                       | Overall survival(n=482)<br><br>Breast cancer-specific mortality(n=378)<br><br>Breast cancer-specific mortality stage I-II (n=256) | ≥0.85 vs. <0.80<br><br>≥0.85 vs. <0.80<br><br>≥0.85 vs. <0.80 | 1.31 (1.05 - 1.64)<br>P trend=0.01<br><br>1.27 (0.98 - 1.64)<br>P trend=0.06<br><br>1.35 (0.99-0.84)<br>P trend = 0.06                                                   | Region, Age at diagnosis, year of diagnosis, TNM stage, Receptor status                                                                                                                                                                                                                                                                           |

|                                                                                                                                                            |                                                                                                                                                                                                                   |                                                                         |                                                                                                                                                                                                  |                                                                                                                                                                                                                                       |                                                                     |                 |                                       |                                                                                                                                                                |
|------------------------------------------------------------------------------------------------------------------------------------------------------------|-------------------------------------------------------------------------------------------------------------------------------------------------------------------------------------------------------------------|-------------------------------------------------------------------------|--------------------------------------------------------------------------------------------------------------------------------------------------------------------------------------------------|---------------------------------------------------------------------------------------------------------------------------------------------------------------------------------------------------------------------------------------|---------------------------------------------------------------------|-----------------|---------------------------------------|----------------------------------------------------------------------------------------------------------------------------------------------------------------|
|                                                                                                                                                            |                                                                                                                                                                                                                   |                                                                         |                                                                                                                                                                                                  |                                                                                                                                                                                                                                       | Breast cancer-specific mortality stage III-IV (n=108)               | ≥0.85 vs. <0.80 | 1.02 (0.59-1.76)<br>P trend = 0.94    |                                                                                                                                                                |
|                                                                                                                                                            |                                                                                                                                                                                                                   |                                                                         |                                                                                                                                                                                                  |                                                                                                                                                                                                                                       | Breast cancer-specific mortality Age at diagnosis < 55y (n=181)     | ≥0.85 vs. <0.80 | 1.84 (1.25-2.69)<br>P trend < 0.01    |                                                                                                                                                                |
|                                                                                                                                                            |                                                                                                                                                                                                                   |                                                                         |                                                                                                                                                                                                  |                                                                                                                                                                                                                                       | Breast cancer-specific mortality Age at diagnosis ≥55y (n=217)      | ≥0.85 vs. <0.80 | 1.07 (0.76-1.51)<br>P trend=0.58      |                                                                                                                                                                |
|                                                                                                                                                            |                                                                                                                                                                                                                   |                                                                         |                                                                                                                                                                                                  |                                                                                                                                                                                                                                       | Breast cancer-specific mortality ER+PR+ (n=169)                     | ≥0.85 vs. <0.80 | 1.31 (0.88-1.95)<br>P trend =0.18     |                                                                                                                                                                |
|                                                                                                                                                            |                                                                                                                                                                                                                   |                                                                         |                                                                                                                                                                                                  |                                                                                                                                                                                                                                       | Breast cancer-specific mortality Other ER/PR status (n=229)         | ≥0.85 vs. <0.80 | 1.22 (0.76-1.95)<br>P trend=0.40      |                                                                                                                                                                |
| Abrahamson, 2006 <sup>39</sup> , Atlanta, Seattle, New Jersey, United States<br><br>WHR – Included, meta-analysis                                          | Follow-up of cases in case-control study (n= 1254)<br>Pre- (78%) and postmenopausal (22%)<br>Age range: 20-54 years<br>White 75%<br>Non-white 25%<br>86% completed interviews at median 4.2 months post-diagnosis | Diagnosis: 1990-2000, follow up= max 9.8 years<br><2% loss to follow-up | Invasive breast cancer<br>Local 57%<br>Regional 40%<br>Distant 3%<br>ER+ 56%<br>ER- 35%<br>Borderline 3%<br>Unknown 6%                                                                           | Measured at interview, 4.2months post-diagnosis and before treatment<br>Waist circumference, superior to the iliac crest of the pelvis, usually at the level of the umbilicus<br>Hip circumference, maximum extension of the buttocks | Overall survival(n=281) (85% breast cancer deaths)                  | ≥0.86 vs. <0.76 | 1.74 (1.23 - 2.46)<br>P trend =0.0009 | Tumour stage, Income                                                                                                                                           |
|                                                                                                                                                            |                                                                                                                                                                                                                   |                                                                         |                                                                                                                                                                                                  |                                                                                                                                                                                                                                       | Overall survival(n=281)                                             | ≥0.86 vs. <0.76 | 1.52 (1.05-2.19)<br>P trend =0.02     | Tumour stage, Income, BMI                                                                                                                                      |
| Tao MH, 2006 <sup>112</sup> , Shanghai Breast Cancer Study (SBCS), China<br><br>WHR – Included, meta-analysis (mortality)<br>Included, review (recurrence) | Follow-up of cases in case-control study (n= 1455)<br>Pre- and postmenopausal<br>Age range: 25-64 years<br>Response rate: 91.1%                                                                                   | Follow up= 5.1 years, Calendar year: 1996-1998                          | Stage 0-I 24.6%<br>IIA 34.9%<br>IIB 21.9%<br>III-IV 11.3%<br>Unknown 7.1%<br>ER+ 44%<br>ER- 25.5%<br>Unknown 30.0%<br>PR+ 43.5%<br>PR- 25.2%<br>Unknown 31.1%<br>Surgery 99%<br>Chemotherapy 94% | Measured at or soon after diagnosis at interview                                                                                                                                                                                      | Overall survival(n=240) (218 breast cancer deaths, 22 other deaths) | ≥0.84 vs. <0.77 | 1.1 (0.8 - 1.6)<br>P trend=0.31       | Age at diagnosis, education, menopausal status, tumour stage, chemotherapy, tamoxifen use, radiotherapy, oestrogen receptor level, progesterone receptor level |
|                                                                                                                                                            |                                                                                                                                                                                                                   |                                                                         |                                                                                                                                                                                                  |                                                                                                                                                                                                                                       | Disease-free survival (n=298)                                       | ≥0.84 vs. <0.77 | 1.1 (0.8 - 1.6)<br>P trend=0.26       |                                                                                                                                                                |

|                                                                              |                                                                                                        |                                               |                                                                                                                                                                                                                                       |                                                                 |                                                        |                 |                  |                                                                                                               |
|------------------------------------------------------------------------------|--------------------------------------------------------------------------------------------------------|-----------------------------------------------|---------------------------------------------------------------------------------------------------------------------------------------------------------------------------------------------------------------------------------------|-----------------------------------------------------------------|--------------------------------------------------------|-----------------|------------------|---------------------------------------------------------------------------------------------------------------|
|                                                                              |                                                                                                        |                                               | Chemotherapy and traditional Chinese medicine 63%<br>Radiotherapy 38.9%<br>Tamoxifen 63.2%                                                                                                                                            |                                                                 |                                                        |                 |                  |                                                                                                               |
| Borugian M, 2003 <sup>49</sup> , Canada<br><br>WHR – Included, meta-analysis | Prospective cohort of breast cancer survivors (n= 603)<br>Pre- and postmenopausal Mean age: 54.4 years | Follow up= 10 years, Calendar year: 1991-2002 | Tumour grades: Well differentiated 7.6%, moderately differentiated 46.4%, poorly differentiated 46%<br>ER+ 76.4%<br>Tamoxifen 21.9%;<br>Chemotherapy 14.7%;<br>Chemotherapy and tamoxifen 21.4%;<br>Other hormone 1.9%;<br>None 40.1% | Self-administered questionnaire, after surgery before treatment | Breast cancer-specific mortality(n=112) pre-menopausal | ≥0.85 vs. <0.76 | 1.2 (0.4 - 3.4)  | Age, family history, oestrogen receptor level, TNM stage, systemic treatment (chemotherapy or tamoxifen), BMI |
|                                                                              |                                                                                                        |                                               |                                                                                                                                                                                                                                       |                                                                 |                                                        | Per 0.1 unit    | 1.0 (0.6 - 1.8)  |                                                                                                               |
|                                                                              |                                                                                                        |                                               |                                                                                                                                                                                                                                       |                                                                 | Breast cancer-specific mortality(n=63) post-menopausal | ≥0.85 vs. <0.76 | 3.3 (1.1 - 10.4) |                                                                                                               |
|                                                                              |                                                                                                        |                                               |                                                                                                                                                                                                                                       |                                                                 |                                                        | Per 0.1 unit    | 1.4 (0.9 - 2.1)  |                                                                                                               |

**Supplementary Table S7 Description of studies included in or excluded from the descriptive review or meta-analysis of weight change**

| Author, year, study name, country                                                                                                                           | Study description                                     | Time of diagnosis and follow-up | Disease characteristics treatment                                                                                                                                                                                                                                                       | Exposure assessment | Outcome (events)                                             | Contrast                                                 | RR (95% CI)           | Covariates                                                                                                                                                                                                                                                                                                                                                                                                                |
|-------------------------------------------------------------------------------------------------------------------------------------------------------------|-------------------------------------------------------|---------------------------------|-----------------------------------------------------------------------------------------------------------------------------------------------------------------------------------------------------------------------------------------------------------------------------------------|---------------------|--------------------------------------------------------------|----------------------------------------------------------|-----------------------|---------------------------------------------------------------------------------------------------------------------------------------------------------------------------------------------------------------------------------------------------------------------------------------------------------------------------------------------------------------------------------------------------------------------------|
| Franzoi MA, 2021 <sup>238</sup> , MONARCH 2 AND MONARCH 3 trials, Multi-national                                                                            | Secondary analysis of clinical trials (n=1138)        |                                 | Advanced ER-positive, Her2-negative breast cancer; 757 abemaciclib + endocrine therapy, 381 only endocrine therapy                                                                                                                                                                      | Measured            | Abemaciclib + endocrine therapy<br>Progression-free survival | <5% vs >=5%                                              | Log-rank test: P=0.55 |                                                                                                                                                                                                                                                                                                                                                                                                                           |
|                                                                                                                                                             |                                                       |                                 |                                                                                                                                                                                                                                                                                         |                     | Placebo + endocrine therapy<br>Progression-free survival     | <5% vs >=5%                                              | Log-rank test: P=0.95 |                                                                                                                                                                                                                                                                                                                                                                                                                           |
| Weight change during treatment<br>- Excluded                                                                                                                |                                                       |                                 |                                                                                                                                                                                                                                                                                         |                     |                                                              |                                                          |                       |                                                                                                                                                                                                                                                                                                                                                                                                                           |
| Jung AY, 2021 <sup>218</sup> , Mammary Carcinoma Risk Factor Investigation (MARIE) study, Germany<br><br>Post diagnosis weight change<br>- Included, review | Population-based Cohort Study (n=2216), mean age:62.9 | Diagnosed: 2002-2005            | Invasive breast cancer. Grade low/moderate 69.1%, high 21.7%. HER2 positive 16.5%, negative 69.9%. Mastectomy 2.6%, mastectomy + axilla 23.5%, breast conserving 8.6%, breast conserving + axilla 65.3%. Chemotherapy 45.6%. Radiotherapy 80%. Tamoxifen/aromatase inhibitor use 80.9%. | Self-reported       | All-cause mortality (n=234.0)                                | Large loss (>10%) vs Maintenance (within 5%)             | 2.49(1.61-3.88)       | Age at diagnosis, BMI at diagnosis, grade, hormone receptor status, mode of detection, nodal status, recurrence, study centre, tumor size, baseline height, menopausal hormone therapy at diagnosis and chemotherapy, physical activity, waist-hip ratio, type of surgery, radiation therapy, tamoxifen/aromatase inhibitor therapy, comorbidities [CCI], smoking, alcohol, education, HER2 status, self-perceived health |
|                                                                                                                                                             |                                                       |                                 |                                                                                                                                                                                                                                                                                         |                     |                                                              | Moderate loss (>=5% to <=10%) vs Maintenance (within 5%) | 1.42(0.95-2.13)       |                                                                                                                                                                                                                                                                                                                                                                                                                           |
|                                                                                                                                                             |                                                       |                                 |                                                                                                                                                                                                                                                                                         |                     |                                                              | Moderate gain (>=5% to <=10%) vs Maintenance (within 5%) | 0.77(0.50-1.20)       |                                                                                                                                                                                                                                                                                                                                                                                                                           |
|                                                                                                                                                             |                                                       |                                 |                                                                                                                                                                                                                                                                                         |                     |                                                              | Large gain (>10%) vs Maintenance (within 5%)             | 1.64(1.02-2.62)       |                                                                                                                                                                                                                                                                                                                                                                                                                           |
|                                                                                                                                                             |                                                       |                                 |                                                                                                                                                                                                                                                                                         |                     | Cancer specific mortality (n=129.0)                          | Large loss (>10%) vs Maintenance (within 5%)             | 3.09(1.70-5.62)       |                                                                                                                                                                                                                                                                                                                                                                                                                           |
|                                                                                                                                                             |                                                       |                                 |                                                                                                                                                                                                                                                                                         |                     |                                                              | Moderate loss (>=5% to <=10%) vs Maintenance (within 5%) | 1.16(0.62-2.16)       |                                                                                                                                                                                                                                                                                                                                                                                                                           |
|                                                                                                                                                             |                                                       |                                 |                                                                                                                                                                                                                                                                                         |                     |                                                              | Moderate gain (>=5% to <=10%) vs                         | 0.81(0.46-1.42)       |                                                                                                                                                                                                                                                                                                                                                                                                                           |

|  |  |  |  |                                                        |                                                          |                 |
|--|--|--|--|--------------------------------------------------------|----------------------------------------------------------|-----------------|
|  |  |  |  |                                                        | Maintenance (within 5%)                                  |                 |
|  |  |  |  |                                                        | Large gain (>10%) vs Maintenance (within 5%)             | 2.24(1.25-4.02) |
|  |  |  |  | Recurrence-free survival (n=239.0)                     | Large loss (>10%) vs Maintenance (within 5%)             | 1.43(0.86-2.35) |
|  |  |  |  |                                                        | Moderate loss (>=5% to <=10%) vs Maintenance (within 5%) | 1.28(0.86-1.89) |
|  |  |  |  |                                                        | Moderate gain (>=5% to <=10%) vs Maintenance (within 5%) | 0.73(0.46-1.15) |
|  |  |  |  |                                                        | Large gain (>10%) vs Maintenance (within 5%)             | 1.22(0.74-2.01) |
|  |  |  |  | Normal weight at baseline All-cause mortality (n=83.0) | Weight loss >=5% vs Maintenance (within 5%)              | 2.33(1.30-4.16) |
|  |  |  |  |                                                        | Weight gain >=5% vs Maintenance (within 5%)              | 1.11(0.62-1.99) |
|  |  |  |  | Overweight All-cause mortality (n=148.0)               | Weight loss >=5% vs Maintenance (within 5%)              | 1.70(1.15-2.53) |
|  |  |  |  |                                                        | Weight gain >=5% vs Maintenance (within 5%)              | 0.94(0.60-1.48) |
|  |  |  |  | Normal weight at baseline Cancer                       | Weight loss >=5% vs Maintenance (within 5%)              | 2.17(0.87-5.42) |

|  |  |  |  |  |                                                              |                                             |                 |  |
|--|--|--|--|--|--------------------------------------------------------------|---------------------------------------------|-----------------|--|
|  |  |  |  |  | specific mortality (n=45.0)                                  | Weight gain >=5% vs Maintenance (within 5%) | 1.76(0.84-3.69) |  |
|  |  |  |  |  | Overweight at baseline Cancer specific mortality (n=84.0)    | Weight loss >=5% vs Maintenance (within 5%) | 1.69(0.97-2.96) |  |
|  |  |  |  |  |                                                              | Weight gain >=5% vs Maintenance (within 5%) | 0.88(0.48-1.59) |  |
|  |  |  |  |  | Normal weight at baseline Recurrence-free survival (n=87.0)  | Weight loss >=5% vs Maintenance (within 5%) | 1.60(0.91-2.84) |  |
|  |  |  |  |  |                                                              | Weight gain >=5% vs Maintenance (within 5%) | 0.64(0.33-1.24) |  |
|  |  |  |  |  | Overweight at baseline Recurrence-free survival (n=149.0)    | Weight loss >=5% vs Maintenance (within 5%) | 1.29(0.86-1.95) |  |
|  |  |  |  |  |                                                              | Weight gain >=5% vs Maintenance (within 5%) | 0.98(0.63-1.53) |  |
|  |  |  |  |  | Charlson comorbidity index 0-1 All-cause mortality (n=171.0) | Weight loss >=5% vs Maintenance (within 5%) | 1.48(1.00-2.20) |  |
|  |  |  |  |  |                                                              | Weight gain >=5% vs Maintenance (within 5%) | 1.08(0.71-1.62) |  |
|  |  |  |  |  | Charlson comorbidity index >=2 All-cause mortality (n=171.0) | Weight loss >=5% vs Maintenance (within 5%) | 2.80(1.46-5.34) |  |
|  |  |  |  |  |                                                              | Weight gain >=5% vs Maintenance (within 5%) | 0.97(0.47-1.99) |  |
|  |  |  |  |  | Charlson comorbidity index 0-1 Cancer                        | Weight loss >=5% vs Maintenance (within 5%) | 1.63(0.95-2.79) |  |

|  |  |  |  |  |                                                                   |                                                            |                 |
|--|--|--|--|--|-------------------------------------------------------------------|------------------------------------------------------------|-----------------|
|  |  |  |  |  | specific mortality (n=102.0)                                      | Weight gain >=5% vs Maintenance (within 5%)                | 1.45(0.87-2.42) |
|  |  |  |  |  | Charlson comorbidity index >=2 Cancer specific mortality (n=26.0) | Weight loss >=5% vs Maintenance (within 5%)                | 2.56(0.74-8.90) |
|  |  |  |  |  |                                                                   | Weight gain >=5% vs Maintenance (within 5%)                | 1.39(0.45-4.26) |
|  |  |  |  |  | Charlson comorbidity index 0-1 Recurrence-free survival (n=178.0) | Weight loss >=5% vs Maintenance (within 5%)                | 1.08(0.71-1.62) |
|  |  |  |  |  |                                                                   | Weight gain >=5% vs Maintenance (within 5%)                | 0.91(0.60-1.36) |
|  |  |  |  |  | Charlson comorbidity index >=2 Recurrence-free survival (n=61.0)  | Weight loss >=5% vs Maintenance (within 5%)                | 2.57(1.33-4.95) |
|  |  |  |  |  |                                                                   | Weight gain >=5% vs Maintenance (within 5%)                | 0.77(0.35-1.68) |
|  |  |  |  |  | All-cause mortality (n=234.0)                                     | Fast weight loss (>10%) vs Maintenance (within 5%)         | 1.83(1.27-2.63) |
|  |  |  |  |  |                                                                   | Slow weight loss (>=5% to <=1%) vs Maintenance (within 5%) | 1.36(0.88-2.09) |
|  |  |  |  |  |                                                                   | Slow weight gain (>=5% to <=1%) vs Maintenance (within 5%) | 1.04(0.66-1.64) |
|  |  |  |  |  |                                                                   | Fast weight gain (>1%) vs Maintenance (within 5%)          | 1.23(0.84-1.79) |



|  |  |  |  |  |                                                   |                                                            |                 |  |
|--|--|--|--|--|---------------------------------------------------|------------------------------------------------------------|-----------------|--|
|  |  |  |  |  | Cancer specific mortality (n=129.0)               | Fast weight loss (>10%) vs Maintenance (within 5%)         | 1.82(1.07-3.10) |  |
|  |  |  |  |  |                                                   | Slow weight loss (>=5% to <=1%) vs Maintenance (within 5%) | 1.11(0.59-2.11) |  |
|  |  |  |  |  |                                                   | Slow weight gain (>=5% to <=1%) vs Maintenance (within 5%) | 1.38(0.75-2.52) |  |
|  |  |  |  |  |                                                   | Fast weight gain (>1%) vs Maintenance (within 5%)          | 1.54(0.93-2.55) |  |
|  |  |  |  |  | Recurrence-free survival (n=239.0)                | Fast weight loss (>10%) vs Maintenance (within 5%)         | 1.32(0.93-1.89) |  |
|  |  |  |  |  |                                                   | Slow weight loss (>=5% to <=1%) vs Maintenance (within 5%) | 1.06(0.68-1.64) |  |
|  |  |  |  |  |                                                   | Slow weight gain (>=5% to <=1%) vs Maintenance (within 5%) | 0.88(0.58-1.35) |  |
|  |  |  |  |  |                                                   | Fast weight gain (>1%) vs Maintenance (within 5%)          | 0.95(0.65-1.39) |  |
|  |  |  |  |  | Weight gain >=5% All-cause mortality (n=47)       | Per 1 %                                                    | 1.02(1.00-1.05) |  |
|  |  |  |  |  | Weight gain >=5% Cancer specific mortality (n=32) |                                                            | 1.04(1.02-1.07) |  |

|                                                                                                                           |                                                              |                             |                                   |          |                                                           |                                     |                 |                                                                                                                    |
|---------------------------------------------------------------------------------------------------------------------------|--------------------------------------------------------------|-----------------------------|-----------------------------------|----------|-----------------------------------------------------------|-------------------------------------|-----------------|--------------------------------------------------------------------------------------------------------------------|
|                                                                                                                           |                                                              |                             |                                   |          | Weight gain >=5%<br>Recurrence-free survival (n=40)       |                                     | 1.02(0.99-1.04) |                                                                                                                    |
|                                                                                                                           |                                                              |                             |                                   |          | Weight loss >=5% All-cause mortality (n=61)               |                                     | 1.05(1.03-1.08) |                                                                                                                    |
|                                                                                                                           |                                                              |                             |                                   |          | Weight loss >=5% Cancer specific mortality (n=30)         |                                     | 1.06(1.03-1.10) |                                                                                                                    |
|                                                                                                                           |                                                              |                             |                                   |          | Weight loss >=5% Recurrence-free survival (n=52)          |                                     | 1.02(1.00-1.05) |                                                                                                                    |
| Martel S, 2021 <sup>120</sup> , ALTO BIG 2-06 trial, Multi-country<br><br>Post diagnosis weight change - Included, review | Secondary analysis of clinical trials (n=8381), mostly White | Follow-up: median 4.5 years | HER2-positive early breast cancer | Measured | Overall survival (n=141.0)                                | Weight loss (>=5%) vs Stable weight | 1.83(1.18-2.84) | Region, ethnicity, age, menopausal status, nodal status, size, location, grade, type of chemo, surgery, HER status |
|                                                                                                                           |                                                              |                             |                                   |          |                                                           | Weight gain (>=5%) vs Stable weight | 1.21(0.82-1.77) |                                                                                                                    |
|                                                                                                                           |                                                              |                             |                                   |          | Disease free survival (n=559.0)                           | Weight loss (>=5%) vs Stable weight | 1.34(1.05-1.71) |                                                                                                                    |
|                                                                                                                           |                                                              |                             |                                   |          |                                                           | Weight gain (>=5%) vs Stable weight | 1.16(0.96-1.40) |                                                                                                                    |
|                                                                                                                           |                                                              |                             |                                   |          | Distant disease-free survival (n=341.0)                   | Weight loss (>=5%) vs Stable weight | 1.46(1.07-1.98) |                                                                                                                    |
|                                                                                                                           |                                                              |                             |                                   |          |                                                           | Weight gain (>=5%) vs Stable weight | 1.25(0.99-1.59) |                                                                                                                    |
|                                                                                                                           |                                                              |                             |                                   |          | Normal weight at baseline Overall survival (n=260.0)      | Weight loss (>=5%) vs Stable weight | 2.00(0.95-4.19) |                                                                                                                    |
|                                                                                                                           |                                                              |                             |                                   |          |                                                           | Weight gain (>=5%) vs Stable weight | 1.29(0.72-2.32) |                                                                                                                    |
|                                                                                                                           |                                                              |                             |                                   |          | Normal weight at baseline Disease free survival (n=260.0) | Weight loss (>=5%) vs Stable weight | 1.33(0.91-1.95) |                                                                                                                    |
|                                                                                                                           |                                                              |                             |                                   |          |                                                           | Weight gain (>=5%) vs Stable weight | 1.05(0.80-1.38) |                                                                                                                    |
| Normal weight at baseline Distant                                                                                         | Weight loss (>=5%) vs Stable weight                          | 1.69(1.04-2.77)             |                                   |          |                                                           |                                     |                 |                                                                                                                    |

|  |  |  |  |                                                                |                                     |                 |
|--|--|--|--|----------------------------------------------------------------|-------------------------------------|-----------------|
|  |  |  |  | disease-free survival (n=260.0)                                | Weight gain (>=5%) vs Stable weight | 1.39(0.98-1.97) |
|  |  |  |  | Overweight at baseline Overall survival (n=122.0)              | Weight loss (>=5%) vs Stable weight | 0.89(0.34-2.38) |
|  |  |  |  |                                                                | Weight gain (>=5%) vs Stable weight | 1.27(0.63-2.54) |
|  |  |  |  | Overweight at baseline Disease free survival (n=122.0)         | Weight loss (>=5%) vs Stable weight | 1.28(0.82-2.00) |
|  |  |  |  |                                                                | Weight gain (>=5%) vs Stable weight | 1.40(0.99-1.97) |
|  |  |  |  | Overweight at baseline Distant disease-free survival (n=122.0) | Weight loss (>=5%) vs Stable weight | 1.02(0.55-1.86) |
|  |  |  |  |                                                                | Weight gain (>=5%) vs Stable weight | 1.13(0.72-1.77) |
|  |  |  |  | Obese at baseline Overall survival (n=83.0)                    | Weight loss (>=5%) vs Stable weight | 3.01(1.38-6.57) |
|  |  |  |  |                                                                | Weight gain (>=5%) vs Stable weight | 0.97(0.38-2.49) |
|  |  |  |  | Obese at baseline Disease free survival (n=122.0)              | Weight loss (>=5%) vs Stable weight | 1.45(0.91-2.30) |
|  |  |  |  |                                                                | Weight gain (>=5%) vs Stable weight | 1.10(0.70-1.71) |
|  |  |  |  | Obese at baseline Distant disease-free survival (n=83.0)       | Weight loss (>=5%) vs Stable weight | 1.59(0.91-2.78) |
|  |  |  |  |                                                                | Weight gain (>=5%) vs Stable weight | 1.17(0.68-1.99) |
|  |  |  |  | Premenopausal Overall survival (n=56.0)                        | Weight loss (>=5%) vs Stable weight | 2.97(1.55-5.68) |
|  |  |  |  |                                                                | Weight gain (>=5%) vs Stable weight | 1.35(0.71-2.55) |
|  |  |  |  |                                                                | Weight loss (>=5%) vs Stable weight | 1.57(1.11-2.22) |

|  |  |  |  |                                                                        |                                        |                 |  |
|--|--|--|--|------------------------------------------------------------------------|----------------------------------------|-----------------|--|
|  |  |  |  | Premenopausal<br>Disease-free survival<br>(n=255.0)                    | Weight gain (>=5%) vs<br>Stable weight | 1.28(0.97-1.68) |  |
|  |  |  |  | Premenopausal<br>Distant disease-free<br>survival (n=161.0)            | Weight loss (>=5%) vs<br>Stable weight | 1.97(1.29-3.02) |  |
|  |  |  |  |                                                                        | Weight gain (>=5%) vs<br>Stable weight | 1.51(1.06-2.14) |  |
|  |  |  |  | Postmenopausal<br>Overall survival<br>(n=85.0)                         | Weight loss (>=5%) vs<br>Stable weight | 1.20(0.63-2.28) |  |
|  |  |  |  |                                                                        | Weight gain (>=5%) vs<br>Stable weight | 1.14(0.70-1.86) |  |
|  |  |  |  | Postmenopausal<br>Disease-free survival<br>(n=304.0)                   | Weight loss (>=5%) vs<br>Stable weight | 1.18(0.84-1.66) |  |
|  |  |  |  |                                                                        | Weight gain (>=5%) vs<br>Stable weight | 1.07(0.82-1.39) |  |
|  |  |  |  | Postmenopausal<br>Distant disease-free<br>survival (n=180.0)           | Weight loss (>=5%) vs<br>Stable weight | 1.11(0.71-1.75) |  |
|  |  |  |  |                                                                        | Weight gain (>=5%) vs<br>Stable weight | 1.11(0.79-1.55) |  |
|  |  |  |  | Hormone receptor<br>+ve Overall survival<br>(n=79.0)                   | Weight loss (>=5%) vs<br>Stable weight | 2.24(1.25-4.02) |  |
|  |  |  |  |                                                                        | Weight gain (>=5%) vs<br>Stable weight | 1.63(0.98-2.70) |  |
|  |  |  |  | Hormone receptor<br>+ve Disease free<br>survival (n=330.0)             | Weight loss (>=5%) vs<br>Stable weight | 1.46(1.07-1.99) |  |
|  |  |  |  |                                                                        | Weight gain (>=5%) vs<br>Stable weight | 1.35(1.06-1.73) |  |
|  |  |  |  | Hormone receptor<br>+ve Distant disease-<br>free survival<br>(n=202.0) | Weight loss (>=5%) vs<br>Stable weight | 1.48(0.99-2.22) |  |
|  |  |  |  |                                                                        | Weight gain (>=5%) vs<br>Stable weight | 1.48(1.09-2.00) |  |
|  |  |  |  |                                                                        | Weight loss (>=5%) vs<br>Stable weight | 1.35(0.68-2.69) |  |

|  |  |  |  |                                                                                |                                        |                 |  |
|--|--|--|--|--------------------------------------------------------------------------------|----------------------------------------|-----------------|--|
|  |  |  |  | Hormone receptor -<br>ve Overall survival<br>(n=62.0)                          | Weight gain (>=5%) vs<br>Stable weight | 0.98(0.66-1.44) |  |
|  |  |  |  | Hormone receptor -<br>ve Disease-free<br>survival (n=229.0)                    | Weight loss (>=5%) vs<br>Stable weight | 1.21(0.82-1.77) |  |
|  |  |  |  |                                                                                | Weight gain (>=5%) vs<br>Stable weight | 0.93(0.69-1.27) |  |
|  |  |  |  | Hormone receptor -<br>ve Distant disease-<br>free survival<br>(n=139.0)        | Weight loss (>=5%) vs<br>Stable weight | 1.47(0.92-2.35) |  |
|  |  |  |  |                                                                                | Weight gain (>=5%) vs<br>Stable weight | 0.98(0.66-1.44) |  |
|  |  |  |  | Treated with<br>trastuzumab alone<br>Overall survival<br>(n=94.0)              | Weight loss (>=5%) vs<br>Stable weight | 1.87(0.83-4.21) |  |
|  |  |  |  |                                                                                | Weight gain (>=5%) vs<br>Stable weight | 1.09(0.54-2.21) |  |
|  |  |  |  | Treated with<br>trastuzumab alone<br>Disease-free survival<br>(n=151.0)        | Weight loss (>=5%) vs<br>Stable weight | 1.42(0.88-2.28) |  |
|  |  |  |  |                                                                                | Weight gain (>=5%) vs<br>Stable weight | 1.20(0.84-1.71) |  |
|  |  |  |  | Treated with<br>trastuzumab alone<br>Distant disease-free<br>survival (n=94.0) | Weight loss (>=5%) vs<br>Stable weight | 1.51(0.82-2.76) |  |
|  |  |  |  |                                                                                | Weight gain (>=5%) vs<br>Stable weight | 1.33(0.85-2.09) |  |
|  |  |  |  | Treated with<br>lapatinib alone<br>Overall survival<br>(n=41.0)                | Weight loss (>=5%) vs<br>Stable weight | 2.62(1.19-5.79) |  |
|  |  |  |  |                                                                                | Weight gain (>=5%) vs<br>Stable weight | 1.79(0.86-3.70) |  |
|  |  |  |  | Treated with<br>lapatinib alone<br>Disease-free survival<br>(n=147.0)          | Weight loss (>=5%) vs<br>Stable weight | 1.62(1.05-2.49) |  |
|  |  |  |  |                                                                                | Weight gain (>=5%) vs<br>Stable weight | 1.00(0.68-1.47) |  |
|  |  |  |  | Treated with<br>lapatinib alone                                                | Weight loss (>=5%) vs<br>Stable weight | 1.98(1.19-3.30) |  |

|                                                              |                                               |  |                                                                |          |                                                                                        |                                     |                        |  |
|--------------------------------------------------------------|-----------------------------------------------|--|----------------------------------------------------------------|----------|----------------------------------------------------------------------------------------|-------------------------------------|------------------------|--|
|                                                              |                                               |  |                                                                |          | Distant disease-free survival (n=102.0)                                                | Weight gain (>=5%) vs Stable weight | 1.24(0.79-1.96)        |  |
|                                                              |                                               |  |                                                                |          | Treated with trastuzumab followed by lapatinib Overall survival (n=24.0)               | Weight loss (>=5%) vs Stable weight | 0.99(0.28-3.47)        |  |
|                                                              |                                               |  |                                                                |          |                                                                                        | Weight gain (>=5%) vs Stable weight | 0.90(0.35-2.36)        |  |
|                                                              |                                               |  |                                                                |          | Treated with trastuzumab followed by lapatinib Disease free survival (n=126.0)         | Weight loss (>=5%) vs Stable weight | 1.34(0.81-2.24)        |  |
|                                                              |                                               |  |                                                                |          |                                                                                        | Weight gain (>=5%) vs Stable weight | 1.10(0.73-1.66)        |  |
|                                                              |                                               |  |                                                                |          | Treated with trastuzumab followed by lapatinib Distant disease-free survival (n=126.0) | Weight loss (>=5%) vs Stable weight | 1.61(0.84-3.11)        |  |
|                                                              |                                               |  |                                                                |          |                                                                                        | Weight gain (>=5%) vs Stable weight | 1.11(0.65-1.92)        |  |
|                                                              |                                               |  |                                                                |          | Treated with trastuzumab + lapatinib Overall survival (n=33.0)                         | Weight loss (>=5%) vs Stable weight | 1.62(0.64-4.15)        |  |
|                                                              |                                               |  |                                                                |          |                                                                                        | Weight gain (>=5%) vs Stable weight | 1.17(0.53-2.60)        |  |
|                                                              |                                               |  |                                                                |          | Treated with trastuzumab + lapatinib Disease free survival (n=135.0)                   | Weight loss (>=5%) vs Stable weight | 1.00(0.58-1.73)        |  |
|                                                              |                                               |  |                                                                |          |                                                                                        | Weight gain (>=5%) vs Stable weight | 1.37(0.94-2.00)        |  |
|                                                              |                                               |  |                                                                |          | Treated with trastuzumab + lapatinib Distant disease-free survival (n=74.0)            | Weight loss (>=5%) vs Stable weight | 0.69(0.29-1.62)        |  |
|                                                              |                                               |  |                                                                |          |                                                                                        | Weight gain (>=5%) vs Stable weight | 1.40(0.85-2.31)        |  |
| Corona SP, 2020 <sup>365</sup> , BALLET study, Multi-country | Secondary analysis of clinical trials (n=687) |  | Advanced or metastatic hormone receptor-positive breast cancer | Measured | Progression-free survival                                                              | Weight loss <=-6.90%                | Log-rank test: P=0.009 |  |
|                                                              |                                               |  |                                                                |          |                                                                                        | weight loss -6.9% to -3.17%         |                        |  |
|                                                              |                                               |  |                                                                |          |                                                                                        | Weight loss -3.17% to 0%            |                        |  |
|                                                              |                                               |  |                                                                |          |                                                                                        | Weight loss >=0%                    |                        |  |

|                                           |                                                    |                                  |                                                                 |                 |                                |                                                     |                         |            |
|-------------------------------------------|----------------------------------------------------|----------------------------------|-----------------------------------------------------------------|-----------------|--------------------------------|-----------------------------------------------------|-------------------------|------------|
| Weight change during treatment - Excluded |                                                    |                                  |                                                                 |                 |                                | Absolute weight loss <=-4.90                        | Log-rank test: P=0.069  | Unadjusted |
|                                           |                                                    |                                  |                                                                 |                 |                                | Absolute weight loss - 4.90 to -2                   |                         |            |
|                                           |                                                    |                                  |                                                                 |                 |                                | Absolute weight loss - 2 to 0                       |                         |            |
|                                           |                                                    |                                  |                                                                 |                 |                                | Absolute weight loss >=0                            |                         |            |
|                                           |                                                    |                                  |                                                                 |                 |                                | Weight loss -6.9% to -3.17% vs Weight loss <=-6.90% | 1.13(0.56-2.29)         |            |
|                                           |                                                    |                                  |                                                                 |                 |                                | Weight loss -3.17% to 0% vs Weight loss <=-6.90%    | 1.18(0.84-1.64)         |            |
|                                           |                                                    |                                  |                                                                 |                 |                                | Weight loss >=0% vs Weight loss <=-6.90%            | 1.39(1.09-1.76)         |            |
|                                           |                                                    |                                  |                                                                 |                 |                                | Weight loss -6.9% to -3.17% vs Weight loss <=-6.90% | 1.36(0.95-1.95)         |            |
|                                           |                                                    |                                  |                                                                 |                 |                                | Weight loss -3.17% to 0% vs Weight loss <=-6.90%    | 1.23(0.98-1.55)         |            |
|                                           |                                                    |                                  |                                                                 |                 |                                | Weight loss >=0% vs Weight loss <=-6.90%            | 1.14(0.91-1.43)         |            |
|                                           |                                                    |                                  |                                                                 |                 |                                | Grade 1 vs Grade 0                                  | 0.93(0.73-1.18)         |            |
|                                           |                                                    |                                  |                                                                 |                 |                                | Grade 2 vs Grade 0                                  | 0.91(0.71-1.17)         |            |
|                                           |                                                    |                                  |                                                                 |                 |                                | Grade 3 vs Grade 0                                  | 0.69(0.53-0.87)         |            |
|                                           |                                                    |                                  |                                                                 |                 |                                | Grade 4 vs Grade 0                                  | 0.69(0.48-0.99)         |            |
| Fadelu T, 2020 <sup>124</sup> , Haiti     | Retro-spective Cohort of Cancer Survivors (n=224), | Diagnosed: 2012-2016, follow-up: | Nonmetastatic breast cancer; Locally advanced disease; 58.5% ER | Medical records | Disease free survival (n=80.0) | Weight loss weight gain                             | Log-rank test: P=0.7514 |            |

|                                                                                                      |                                                                                                             |                                                  |                                                                                                                                                                                                                                                                                                                 |                           |                                     |                                                          |                          |                                                                                                                                                                   |
|------------------------------------------------------------------------------------------------------|-------------------------------------------------------------------------------------------------------------|--------------------------------------------------|-----------------------------------------------------------------------------------------------------------------------------------------------------------------------------------------------------------------------------------------------------------------------------------------------------------------|---------------------------|-------------------------------------|----------------------------------------------------------|--------------------------|-------------------------------------------------------------------------------------------------------------------------------------------------------------------|
| Weight change during treatment - Excluded                                                            | mean age:49.1 years, Postmenopausal 36.2%.                                                                  | median 21.7 months                               | positive 61.8%; Neoadjuvant chemotherapy 45.1%, adjuvant chemotherapy 82.6%.                                                                                                                                                                                                                                    |                           |                                     | Loss >3%<br>Stable +/-3%<br>Gain >3%                     | Log-rank test: P= 0.1327 |                                                                                                                                                                   |
| Tryggvadottir H, 2019 <sup>240</sup> , Sweden<br><br>Post diagnosis weight change – Included, review | Prospective Cohort of Cancer Survivors (n=1178) mean age:61.5                                               | Diagnosed: 2002-2014, follow-up:13 years maximum | Breast cancer. Histological grade I 24.7%, II 47.7%, III 27.6%. ER + 88.5%. PR+ 71.8%. Chemotherapy 28.2%. Radiotherapy 61.2%                                                                                                                                                                                   | Measured                  | Age >= 70 years All-cause mortality | Weight loss (>5%) vs Stable weight (<=5%)                | 3.56 (1.5-8.44)          | Age at diagnosis, axillary node dissection, er status, histological grade, tumor size, weight                                                                     |
|                                                                                                      |                                                                                                             |                                                  |                                                                                                                                                                                                                                                                                                                 |                           | Age < 50y Recurrence (n=33.0)       | Weight gain (>5%) vs Stable weight (<=5%)                | 2.64 (1.28-5.45)         |                                                                                                                                                                   |
|                                                                                                      |                                                                                                             |                                                  |                                                                                                                                                                                                                                                                                                                 |                           | Age >= 70 years Recurrence (n=20.0) | Weight loss (>5%) vs Stable weight (<=5%)                | 3.47 (1.06-11.33)        |                                                                                                                                                                   |
| Flanagan MR, 2018 <sup>132</sup> , USA<br><br>Post diagnosis weight change - Included, review        | Nested Case-control Study (n=1310), 520 Pre or perimenopausal, 749 Postmenopausal, 41 Unknown. Mostly white | Diagnosed: 1995-2013 (diagnosed with DCIS)       | Breast cancer: Ductal carcinoma In situ; Histology of DCIS (n): 494 Mixed, 298 NOS, 171 Comedo, 158 Cribriform, 128 Solid, 61 other; Treatment for initial DCIS (n): 13 Biopsy only, 707 BCS with radiation, 308 without radiation, 282 Mastectomy. Adjuvant endocrine therapy (n): 863 No, 445 Yes, 2 Unknown. | Interview Medical records | Any second breast cancer            | Weight Loss >/=6 kg vs Weight Gain or loss within 2 kg   | 1.30(0.90-2.00)          | Adjuvant endocrine therapy, age, grade, histology, menopausal status at diagnosis, other covariates, radiation therapy, surgery, survival time, year of diagnosis |
|                                                                                                      |                                                                                                             |                                                  |                                                                                                                                                                                                                                                                                                                 |                           |                                     | Weight Loss >2-5.9 kg vs Weight Gain or loss within 2 kg | 0.90(0.60-1.30)          |                                                                                                                                                                   |
|                                                                                                      |                                                                                                             |                                                  |                                                                                                                                                                                                                                                                                                                 |                           |                                     | Weight Gain >2-5.9 kg vs Weight Gain or loss within 2 kg | 0.90(0.60-1.20)          |                                                                                                                                                                   |
|                                                                                                      |                                                                                                             |                                                  |                                                                                                                                                                                                                                                                                                                 |                           |                                     | Weight Gain >2-5.9 kg vs Weight Gain or loss within 2 kg | 1.00(0.70-1.50)          |                                                                                                                                                                   |
|                                                                                                      |                                                                                                             |                                                  |                                                                                                                                                                                                                                                                                                                 |                           | Invasive secondary breast cancer    | Weight Loss >/=6 kg vs Weight Gain or loss within 2 kg   | 1.30(0.80-2.10)          |                                                                                                                                                                   |
|                                                                                                      |                                                                                                             |                                                  |                                                                                                                                                                                                                                                                                                                 |                           |                                     | Weight Loss >2-5.9 kg vs Weight Gain or loss within 2 kg | 0.90(0.50-1.40)          |                                                                                                                                                                   |
|                                                                                                      |                                                                                                             |                                                  |                                                                                                                                                                                                                                                                                                                 |                           |                                     | Weight Gain >2-5.9 kg vs Weight Gain or loss within 2 kg | 1.00(0.60-1.50)          |                                                                                                                                                                   |



|                                                                                                                        |                                                                                            |                        |                                                                                                                                                                                                                                                              |                                                                      |                                 |                                                            |                  |                                                                                                                                 |
|------------------------------------------------------------------------------------------------------------------------|--------------------------------------------------------------------------------------------|------------------------|--------------------------------------------------------------------------------------------------------------------------------------------------------------------------------------------------------------------------------------------------------------|----------------------------------------------------------------------|---------------------------------|------------------------------------------------------------|------------------|---------------------------------------------------------------------------------------------------------------------------------|
|                                                                                                                        |                                                                                            |                        |                                                                                                                                                                                                                                                              |                                                                      |                                 | Weight gain $\geq 6$ kg vs Weight Gain or loss within 2 kg | 1.10(0.70-1.80)  |                                                                                                                                 |
|                                                                                                                        |                                                                                            |                        |                                                                                                                                                                                                                                                              |                                                                      | In-situ secondary breast cancer | Weight Loss $\geq 6$ kg vs Weight Gain or loss within 2 kg | 1.40(0.70-2.80)  |                                                                                                                                 |
|                                                                                                                        |                                                                                            |                        |                                                                                                                                                                                                                                                              |                                                                      |                                 | Weight Loss $>2-5.9$ kg vs Weight Gain or loss within 2 kg | 0.90(0.50-1.90)  |                                                                                                                                 |
|                                                                                                                        |                                                                                            |                        |                                                                                                                                                                                                                                                              |                                                                      |                                 | Weight Gain $>2-5.9$ kg vs Weight Gain or loss within 2 kg | 0.70(0.40-1.30)  |                                                                                                                                 |
|                                                                                                                        |                                                                                            |                        |                                                                                                                                                                                                                                                              |                                                                      |                                 | Weight gain $\geq 6$ kg vs Weight Gain or loss within 2 kg | 0.80(0.40-1.70)  |                                                                                                                                 |
| Mutschler, 2018 <sup>191</sup> , ADEBAR, Germany<br><br>Weight change during adjuvant chemo-therapy - Included, review | Secondary analysis of clinical trial (n=1080), Pre- and postmenopausal, mean age: 53 years | Follow up= 62.9 months | High-risk early breast cancer patients, lymph node+ positive                                                                                                                                                                                                 | Measured weight between the first and the last cycle of chemotherapy | Overall survival                | Weight loss $\geq 5\%$ vs. stable weight $<5\%$            | 1.55 (0.97-2.47) | Age, menopausal status, tumor stage, nodal status, grade, histological type, hormone receptor status, HER2 status, chemotherapy |
|                                                                                                                        |                                                                                            |                        |                                                                                                                                                                                                                                                              |                                                                      |                                 | Weight gain $\geq 5\%$ vs. stable weight $<5\%$            | 1.55 (1.01-2.40) |                                                                                                                                 |
|                                                                                                                        |                                                                                            |                        |                                                                                                                                                                                                                                                              |                                                                      | Disease-free survival           | Weight loss $\geq 5\%$ vs. stable weight $<5\%$            | 1.43 (0.97-2.11) |                                                                                                                                 |
|                                                                                                                        |                                                                                            |                        |                                                                                                                                                                                                                                                              |                                                                      |                                 | Weight gain $\geq 5\%$ vs. stable weight $<5\%$            | 1.26 (0.88-1.79) |                                                                                                                                 |
| Raghavendra A, 2018 <sup>257</sup><br><br>Weight change during treatment - Included, review                            | Retro-spective Cohort of Cancer Survivors (n=1282) mean age:56.4, Multi-ethnic             | Diagnosed: 1997-2008   | Stage I-III, hormone receptor positive, human epidermal growth factor receptor 2-negative<br>Chemotherapy 54.8%.<br>Endocrine therapy tamoxifen 30.65, aromatase inhibitor 51.8%, sequential aromatase inhibitor and tamoxifen 17.8%.<br>Radiotherapy 67.8%. | Medical records                                                      | Recurrence-free survival        | Weight gain $>5\%$ vs weight change $\leq 5\%$             | 0.95(0.62-1.47)  | Unadjusted                                                                                                                      |

|                                                                                                                                                                 |                                                                             |                                                   |                                                                                                                                                                                                                      |                                                                       |                                                              |                                                  |                                                |                                                                                                                                                                                                   |
|-----------------------------------------------------------------------------------------------------------------------------------------------------------------|-----------------------------------------------------------------------------|---------------------------------------------------|----------------------------------------------------------------------------------------------------------------------------------------------------------------------------------------------------------------------|-----------------------------------------------------------------------|--------------------------------------------------------------|--------------------------------------------------|------------------------------------------------|---------------------------------------------------------------------------------------------------------------------------------------------------------------------------------------------------|
|                                                                                                                                                                 |                                                                             |                                                   | Lumpectomy 54.3%, mastectomy 45.7%.                                                                                                                                                                                  |                                                                       |                                                              |                                                  |                                                |                                                                                                                                                                                                   |
| Cespedes Feliciano EM, 2017 <sup>149</sup> , Kaiser Permanente Northern California (KPNC), United States<br><br>Post-diagnosis weight change - Included, review | Follow-up study of a cancer survivors' cohort (n= 12590), mean age:59 years | Diagnosed: 2005-2013, follow up: 3.4 years median | Early-stage invasive breast cancer; 55% stage I, 35% stage II, 10% stage III; 47% surrogate luminal A; 36% surrogate luminal B; 5% HER2+ endocrine negative; 12% triple negative; 46% chemotherapy; 42% radiotherapy | Measured height and weight at diagnosis and 18 months after diagnosis | All-cause mortality (n=980)                                  | Large loss ( $\geq 10\%$ ) vs stable within 5%   | 2.24 (1.87-2.69)                               | Age, Race, alcohol intake, smoking status, Comorbidity, pre-diagnosis BMI, stage, grade, receipt of adjuvant chemotherapy, receipt of radiotherapy, tumour characteristics ER, PR and HER2 status |
|                                                                                                                                                                 |                                                                             |                                                   |                                                                                                                                                                                                                      |                                                                       | From diagnosis to 18 months post-diagnosis                   | Modest loss ( $>5- <10\%$ ) vs. stable within 5% | 1.15 (0.95-1.39)                               |                                                                                                                                                                                                   |
|                                                                                                                                                                 |                                                                             |                                                   |                                                                                                                                                                                                                      |                                                                       |                                                              | Large gain ( $\geq 10\%$ ) vs. stable within 5%  | 0.98 (0.74 - 1.31)                             |                                                                                                                                                                                                   |
|                                                                                                                                                                 |                                                                             |                                                   |                                                                                                                                                                                                                      |                                                                       |                                                              | Modest gain ( $>5- <10\%$ ) vs. stable within 5% | 0.96 (0.78-1.19)                               |                                                                                                                                                                                                   |
|                                                                                                                                                                 |                                                                             |                                                   |                                                                                                                                                                                                                      |                                                                       |                                                              | All-cause mortality                              | Large loss ( $\geq 10\%$ ) vs stable within 5% |                                                                                                                                                                                                   |
|                                                                                                                                                                 |                                                                             |                                                   |                                                                                                                                                                                                                      |                                                                       | Early follow-up: before 3-year (18-54 months post-diagnosis) | Modest loss ( $>5- <10\%$ ) vs. stable within 5% | 1.39 (1.11-1.74)                               |                                                                                                                                                                                                   |
|                                                                                                                                                                 |                                                                             |                                                   |                                                                                                                                                                                                                      |                                                                       |                                                              | All-cause mortality                              | Large loss ( $\geq 10\%$ ) vs stable within 5% |                                                                                                                                                                                                   |
|                                                                                                                                                                 |                                                                             |                                                   |                                                                                                                                                                                                                      |                                                                       | Late follow-up: after 3-year ( $>54$ months post-diagnosis)  | Modest loss ( $>5- <10\%$ ) vs. stable within 5% | 0.77 (0.54-1.11)                               |                                                                                                                                                                                                   |
|                                                                                                                                                                 |                                                                             |                                                   |                                                                                                                                                                                                                      |                                                                       |                                                              | Breast cancer-specific mortality (n=503)         | Large loss ( $\geq 10\%$ ) vs stable within 5% |                                                                                                                                                                                                   |
|                                                                                                                                                                 |                                                                             |                                                   |                                                                                                                                                                                                                      |                                                                       | Early follow-up: before 3-year (18-54 months post-diagnosis) | Modest loss ( $>5- <10\%$ ) vs. stable within 5% | 1.24 (0.95-1.61)                               |                                                                                                                                                                                                   |
|                                                                                                                                                                 |                                                                             |                                                   |                                                                                                                                                                                                                      |                                                                       |                                                              | Large gain ( $\geq 10\%$ ) vs. stable within 5%  | 0.98 (0.67 - 1.44)                             |                                                                                                                                                                                                   |
|                                                                                                                                                                 |                                                                             |                                                   |                                                                                                                                                                                                                      |                                                                       |                                                              | Modest gain ( $>5- <10\%$ ) vs. stable within 5% | 1.06 (0.79-1.41)                               |                                                                                                                                                                                                   |

|                                                                                                                                                       |                                                                                                                             |                                                                          |                                                                                                                                                                                 |                                                                                                                                                                                 |                                                                                              |                  |                    |                                                                                                                         |
|-------------------------------------------------------------------------------------------------------------------------------------------------------|-----------------------------------------------------------------------------------------------------------------------------|--------------------------------------------------------------------------|---------------------------------------------------------------------------------------------------------------------------------------------------------------------------------|---------------------------------------------------------------------------------------------------------------------------------------------------------------------------------|----------------------------------------------------------------------------------------------|------------------|--------------------|-------------------------------------------------------------------------------------------------------------------------|
| <p>Bao PP, 2016 <sup>42</sup>, Shanghai Breast Cancer Survival Study (SBCSS), China</p> <p>Pre-to-post-diagnosis weight change – Included, review</p> | <p>Prospective cohort study of cancer survivors, (n= 518)</p> <p>Pre- and postmenopausal (53.09%), mean age: 53.4 years</p> | <p>Recruited approx.6.5 months after diagnosis; Follow-up: 9.1 years</p> | <p>Invasive TNBC; stage I 30.9%, II 55.6%, III 10.2%; no metastasis; Mastectomy: 95.6%, Chemotherapy: 94.4 %, Radiotherapy: 27.4 %, Immunotherapy: 17.8 %, Tamoxifen: 21.6%</p> | <p>Self-reported weight 1 year prior and at diagnosis; measured approximately 6, 18, 36 and 60 months after diagnosis</p> <p>Pre- to 18 months post-diagnosis weight change</p> | <p>All-cause mortality (n=110)</p>                                                           | Loss ≥5% vs. ±5% | 2.08 (1.25-3.46)   | <p>Age at diagnosis, education, menopausal status, Exercise, type of surgery, chemotherapy, radiotherapy, TNM stage</p> |
|                                                                                                                                                       |                                                                                                                             |                                                                          |                                                                                                                                                                                 |                                                                                                                                                                                 |                                                                                              | Gain ≥5% vs. ±5% | 1.26 (0.80-2.00)   |                                                                                                                         |
|                                                                                                                                                       |                                                                                                                             |                                                                          |                                                                                                                                                                                 |                                                                                                                                                                                 | <p>All-cause mortality (n= 56) Pre-diagnosis BMI &lt;24 kg/m<sup>2</sup></p>                 | Loss ≥5% vs. ±5% | 1.73 (0.74-4.04)   |                                                                                                                         |
|                                                                                                                                                       |                                                                                                                             |                                                                          |                                                                                                                                                                                 |                                                                                                                                                                                 |                                                                                              | Gain ≥5% vs. ±5% | 1.13 (0.60-2.13)   |                                                                                                                         |
|                                                                                                                                                       |                                                                                                                             |                                                                          |                                                                                                                                                                                 |                                                                                                                                                                                 | <p>All-cause mortality (n= 53) Pre-diagnosis BMI ≥24 kg/m<sup>2</sup></p>                    | Loss ≥5% vs. ±5% | 2.15 (1.09-4.26)   |                                                                                                                         |
|                                                                                                                                                       |                                                                                                                             |                                                                          |                                                                                                                                                                                 |                                                                                                                                                                                 |                                                                                              | Gain ≥5% vs. ±5% | 1.88 (0.92-3.85)   |                                                                                                                         |
|                                                                                                                                                       |                                                                                                                             |                                                                          |                                                                                                                                                                                 |                                                                                                                                                                                 | <p>All-cause mortality (n= 39)</p> <p>Premenopausal</p>                                      | Loss ≥5% vs. ±5% | 6.22 (2.13-8.13)   |                                                                                                                         |
|                                                                                                                                                       |                                                                                                                             |                                                                          |                                                                                                                                                                                 |                                                                                                                                                                                 |                                                                                              | Gain ≥5% vs. ±5% | 2.84 (1.23-6.58)   |                                                                                                                         |
|                                                                                                                                                       |                                                                                                                             |                                                                          |                                                                                                                                                                                 |                                                                                                                                                                                 | <p>All-cause mortality (n= 71)</p> <p>Postmenopausal</p>                                     | Loss ≥5% vs. ±5% | 1.64 (0.91-2.98)   |                                                                                                                         |
|                                                                                                                                                       |                                                                                                                             |                                                                          |                                                                                                                                                                                 |                                                                                                                                                                                 |                                                                                              | Gain ≥5% vs. ±5% | 0.95 (0.50-1.80)   |                                                                                                                         |
|                                                                                                                                                       |                                                                                                                             |                                                                          |                                                                                                                                                                                 |                                                                                                                                                                                 | <p>Relapse/ Disease specific mortality (n=97)</p>                                            | Loss ≥5% vs. ±5% | 2.50 (1.45 - 4.30) |                                                                                                                         |
|                                                                                                                                                       |                                                                                                                             |                                                                          |                                                                                                                                                                                 |                                                                                                                                                                                 |                                                                                              | Gain ≥5% vs. ±5% | 1.32 (0.81-2.15)   |                                                                                                                         |
|                                                                                                                                                       |                                                                                                                             |                                                                          |                                                                                                                                                                                 |                                                                                                                                                                                 | <p>Relapse/ Disease specific mortality (n= 52) Pre-diagnosis BMI &lt;24 kg/m<sup>2</sup></p> | Loss ≥5% vs. ±5% | 1.80 (0.72-4.52)   |                                                                                                                         |
|                                                                                                                                                       |                                                                                                                             |                                                                          |                                                                                                                                                                                 |                                                                                                                                                                                 |                                                                                              | Gain ≥5% vs. ±5% | 1.30 (0.67-2.50)   |                                                                                                                         |
| <p>Relapse/ Disease specific mortality (n= 45) Pre-diagnosis BMI ≥24 kg/m<sup>2</sup></p>                                                             | Loss ≥5% vs. ±5%                                                                                                            | 2.65 (1.28-5.46)                                                         |                                                                                                                                                                                 |                                                                                                                                                                                 |                                                                                              |                  |                    |                                                                                                                         |
|                                                                                                                                                       | Gain ≥5% vs. ±5%                                                                                                            | 1.91 (0.85-4.31)                                                         |                                                                                                                                                                                 |                                                                                                                                                                                 |                                                                                              |                  |                    |                                                                                                                         |
|                                                                                                                                                       | Loss ≥5% vs. ±5%                                                                                                            | 7.26 (2.62-20.11)                                                        |                                                                                                                                                                                 |                                                                                                                                                                                 |                                                                                              |                  |                    |                                                                                                                         |

|                                                                                                                                                                    |                                                               |                      |                                    |                                                                                      |                                                          |                                |                  |                                                                                                                                                                     |
|--------------------------------------------------------------------------------------------------------------------------------------------------------------------|---------------------------------------------------------------|----------------------|------------------------------------|--------------------------------------------------------------------------------------|----------------------------------------------------------|--------------------------------|------------------|---------------------------------------------------------------------------------------------------------------------------------------------------------------------|
|                                                                                                                                                                    |                                                               |                      |                                    |                                                                                      | Relapse/Disease specific mortality (n=40) Premenopausal  | Gain ≥5% vs. ±5%               | 2.38 (1.08-5.25) |                                                                                                                                                                     |
|                                                                                                                                                                    |                                                               |                      |                                    |                                                                                      | Relapse/Disease specific mortality (n=57) Postmenopausal | Loss ≥5% vs. ±5%               | 1.92 (0.98-3.79) |                                                                                                                                                                     |
|                                                                                                                                                                    |                                                               |                      |                                    |                                                                                      |                                                          | Gain ≥5% vs. ±5%               | 1.01 (0.50-2.05) |                                                                                                                                                                     |
| Brooks JD, 2016 <sup>138</sup> , Women's Environmental Cancer and Radiation Epidemiology (WECARE), USA<br><br>Post-diagnosis body weight change - Included, review | Nested Case-control Study (n=3431), mean age:46, Mostly White | Diagnosed: 1985-2008 | Invasive breast cancer stage I-III | Self-reported, Weight change from first diagnosis to second diagnosis/reference date | Pre-menopausal Contralateral breast cancer               | >3 loss vs -3 to <3 loss       | 0.60(0.30-1.30)  | Age at diagnosis, age at menarche, chemotherapy, er status, family history, histology, hormonal therapy, number of full-term pregnancies, radiotherapy, tumor stage |
|                                                                                                                                                                    |                                                               |                      |                                    |                                                                                      |                                                          | 3 to <10 gain vs -3 to <3 loss | 0.90(0.50-1.40)  |                                                                                                                                                                     |
|                                                                                                                                                                    |                                                               |                      |                                    |                                                                                      |                                                          | >=10 gain vs -3 to <3 loss     | 0.50(0.30-1.20)  |                                                                                                                                                                     |
|                                                                                                                                                                    |                                                               |                      |                                    |                                                                                      | Post-menopausal Contralateral breast cancer              | >3 loss vs -3 to <3 loss       | 1.10(0.70-1.90)  |                                                                                                                                                                     |
|                                                                                                                                                                    |                                                               |                      |                                    |                                                                                      |                                                          | 3 to <10 gain vs -3 to <3 loss | 1.00(0.70-1.50)  |                                                                                                                                                                     |
|                                                                                                                                                                    |                                                               |                      |                                    |                                                                                      |                                                          | >=10 gain vs -3 to <3 loss     | 1.30(0.80-2.10)  |                                                                                                                                                                     |
|                                                                                                                                                                    |                                                               |                      |                                    |                                                                                      | Pre- to post-menopausal Contralateral breast cancer      | >3 loss vs -3 to <3 loss       | 1.10 (0.70-1.50) |                                                                                                                                                                     |
|                                                                                                                                                                    |                                                               |                      |                                    |                                                                                      |                                                          | 3 to <10 gain vs -3 to <3 loss | 1.2              |                                                                                                                                                                     |
|                                                                                                                                                                    |                                                               |                      |                                    |                                                                                      |                                                          | >=10 gain vs -3 to <3 loss     | 1.40 (1.01-1.90) |                                                                                                                                                                     |
|                                                                                                                                                                    |                                                               |                      |                                    |                                                                                      | Pre-menopausal, ER+ Contralateral breast cancer          | >3 loss vs -3 to <3 loss       | 0.50(0.10-1.40)  |                                                                                                                                                                     |
|                                                                                                                                                                    |                                                               |                      |                                    |                                                                                      |                                                          | 3 to <10 gain vs -3 to <3 loss | 1.00(0.50-2.10)  |                                                                                                                                                                     |
|                                                                                                                                                                    |                                                               |                      |                                    |                                                                                      |                                                          | >=10 gain vs -3 to <3 loss     | 0.50(0.20-1.60)  |                                                                                                                                                                     |
|                                                                                                                                                                    | >3 loss vs -3 to <3 loss                                      | 0.50(0.10-2.60)      |                                    |                                                                                      |                                                          |                                |                  |                                                                                                                                                                     |

|                                                                    |                                                 |                                               |                                                             |                                             |                                                             |                                |                  |                                                       |
|--------------------------------------------------------------------|-------------------------------------------------|-----------------------------------------------|-------------------------------------------------------------|---------------------------------------------|-------------------------------------------------------------|--------------------------------|------------------|-------------------------------------------------------|
|                                                                    |                                                 |                                               |                                                             |                                             | Pre-menopausal, ER-<br>Contralateral breast cancer          | 3 to <10 gain vs -3 to <3 loss | 0.60(0.20-1.30)  |                                                       |
|                                                                    |                                                 |                                               |                                                             |                                             |                                                             | >=10 gain vs -3 to <3 loss     | 0.40(0.10-1.40)  |                                                       |
|                                                                    |                                                 |                                               |                                                             |                                             | Post-menopausal, ER+<br>Contralateral breast cancer         | >3 loss vs -3 to <3 loss       | 1.40(0.70-2.80)  |                                                       |
|                                                                    |                                                 |                                               |                                                             |                                             |                                                             | 3 to <10 gain vs -3 to <3 loss | 0.90(0.50-1.60)  |                                                       |
|                                                                    |                                                 |                                               |                                                             |                                             |                                                             | >=10 gain vs -3 to <3 loss     | 0.70(0.40-1.40)  |                                                       |
|                                                                    |                                                 |                                               |                                                             |                                             | Post-menopausal, ER-<br>Contralateral breast cancer         | >3 loss vs -3 to <3 loss       | 1.20(0.50-3.00)  |                                                       |
|                                                                    |                                                 |                                               |                                                             |                                             |                                                             | 3 to <10 gain vs -3 to <3 loss | 1.00(0.40-2.10)  |                                                       |
|                                                                    |                                                 |                                               |                                                             |                                             |                                                             | >=10 gain vs -3 to <3 loss     | 2.20(0.70-6.40)  |                                                       |
|                                                                    |                                                 |                                               |                                                             |                                             | Pre- to post-menopausal, ER+<br>Contralateral breast cancer | >3 loss vs -3 to <3 loss       | 0.70(0.40-1.20)  |                                                       |
|                                                                    |                                                 |                                               |                                                             |                                             |                                                             | 3 to <10 gain vs -3 to <3 loss | 1.00(0.70-1.50)  |                                                       |
|                                                                    |                                                 |                                               |                                                             |                                             |                                                             | >=10 gain vs -3 to <3 loss     | 1.20(0.80-1.90)  |                                                       |
|                                                                    |                                                 |                                               |                                                             |                                             | Pre- to post-menopausal, ER-<br>Contralateral breast cancer | >3 loss vs -3 to <3 loss       | 1.70(0.80-3.50)  |                                                       |
|                                                                    |                                                 |                                               |                                                             |                                             |                                                             | 3 to <10 gain vs -3 to <3 loss | 1.40(0.90-2.30)  |                                                       |
|                                                                    |                                                 |                                               |                                                             |                                             |                                                             | >=10 gain vs -3 to <3 loss     | 1.90(0.99-3.80)  |                                                       |
| Pre- to post-menopausal & <25 kg/m2<br>Contralateral breast cancer | >=10 gain vs -3 to <3 loss                      | 1.60(1.10-2.40)                               |                                                             |                                             |                                                             |                                |                  |                                                       |
| Nechuta S, 2016 <sup>27</sup> ,<br>After Breast Cancer Pooling     | Pooled analysis (prospective studies) (final n= | Diagnosed: 1976–2004, follow up= 12 years for | 5-year disease free (survived average 2 years) invasive ER+ | Measured/self-reported, about 1 year before | Late mortality (≥5 years) (n=1183)                          | 5-10% loss vs. ±5%             | 1.16 (0.95-1.41) | Age at diagnosis, TNM stage, PR status, chemotherapy, |
|                                                                    |                                                 |                                               |                                                             |                                             |                                                             | ≥10% loss vs. ±5%              | 1.17 (0.53-2.59) |                                                       |

|                                                                                                                                                                                                                  |                                                                                                                                                                                                                                                |                                             |                                                                                                                                                       |                                                        |                                                            |                                |                    |                                                                                                                                                                                                                                              |                                                                                                                                                                                                                                                                                                    |
|------------------------------------------------------------------------------------------------------------------------------------------------------------------------------------------------------------------|------------------------------------------------------------------------------------------------------------------------------------------------------------------------------------------------------------------------------------------------|---------------------------------------------|-------------------------------------------------------------------------------------------------------------------------------------------------------|--------------------------------------------------------|------------------------------------------------------------|--------------------------------|--------------------|----------------------------------------------------------------------------------------------------------------------------------------------------------------------------------------------------------------------------------------------|----------------------------------------------------------------------------------------------------------------------------------------------------------------------------------------------------------------------------------------------------------------------------------------------------|
| <p>Project (ABCPP) (Women's Healthy Eating and Living (WHEL), Life After Cancer Epidemiology (LACE), Nurses' Health Study (NHS), United States</p> <p>Pre-to-post-diagnosis weight change – Included, review</p> | <p>5675 in recurrence analysis; 6596 in mortality analysis; Mean age: 59.4 years; Pre- and postmenopausal (72.9%)</p> <p>Excluded 921 and 599 women due to event/loss to follow-up prior to 5 years after diagnosis in respective analysis</p> | <p>mortality, 10.6 years for recurrence</p> | <p>breast cancer; Stage I 53.2%, II 35.7%, III 11.1%; PR+ 81.9%; Mastectomy 48.6%; Chemotherapy 46.2%, Radiotherapy 61.6%, Hormonal therapy 86.3%</p> | <p>diagnosis and average 2.1 years after diagnosis</p> |                                                            | 5-10% gain vs. $\pm 5\%$       | 1.08 (0.85-1.36)   | <p>radiotherapy, Surgery, Hormonal therapy, race/ethnicity, menopausal status, Comorbidity, time between exposure measurement and 5-year post-diagnosis date, stratified by study, pre-diagnosis BMI, Exercise, alcohol intake, smoking,</p> |                                                                                                                                                                                                                                                                                                    |
|                                                                                                                                                                                                                  |                                                                                                                                                                                                                                                |                                             |                                                                                                                                                       |                                                        |                                                            | $\geq 10\%$ gain vs. $\pm 5\%$ | 1.06 (0.82 - 1.38) |                                                                                                                                                                                                                                              |                                                                                                                                                                                                                                                                                                    |
|                                                                                                                                                                                                                  |                                                                                                                                                                                                                                                |                                             |                                                                                                                                                       |                                                        | <p>Early mortality (&lt;5 years) (n=216)</p>               | 5-10% loss vs. $\pm 5\%$       | 1.39 (0.93-2.08)   |                                                                                                                                                                                                                                              | <p>Age at diagnosis, TNM stage, PR status, chemotherapy, radiotherapy, Surgery, Hormonal therapy, race/ethnicity, menopausal status, Comorbidity, time between exposure measurement and 5-year post-diagnosis date, stratified by study, post diagnosis BMI, Exercise, alcohol intake, smoking</p> |
|                                                                                                                                                                                                                  |                                                                                                                                                                                                                                                |                                             |                                                                                                                                                       |                                                        |                                                            | $\geq 10\%$ loss vs. $\pm 5\%$ | 1.60 (0.99-2.56)   |                                                                                                                                                                                                                                              |                                                                                                                                                                                                                                                                                                    |
|                                                                                                                                                                                                                  |                                                                                                                                                                                                                                                |                                             |                                                                                                                                                       |                                                        |                                                            | 5-10% gain vs. $\pm 5\%$       | 0.81 (0.53-1.25)   |                                                                                                                                                                                                                                              |                                                                                                                                                                                                                                                                                                    |
|                                                                                                                                                                                                                  |                                                                                                                                                                                                                                                |                                             |                                                                                                                                                       |                                                        |                                                            | $\geq 10\%$ gain vs. $\pm 5\%$ | 1.09 (0.71-1.68)   |                                                                                                                                                                                                                                              |                                                                                                                                                                                                                                                                                                    |
|                                                                                                                                                                                                                  |                                                                                                                                                                                                                                                |                                             |                                                                                                                                                       |                                                        | <p>Late recurrence (<math>\geq 5</math> years) (n=593)</p> | 5-10% loss vs. $\pm 5\%$       | 0.77 (0.56-1.07)   |                                                                                                                                                                                                                                              | <p>Age at diagnosis, TNM stage, PR status, chemotherapy, radiotherapy, Surgery, Hormonal therapy, race/ethnicity, menopausal status, Comorbidity, time between exposure measurement and 5-year post-diagnosis date, stratified by study, pre-diagnosis BMI, Exercise, alcohol intake, smoking</p>  |
|                                                                                                                                                                                                                  |                                                                                                                                                                                                                                                |                                             |                                                                                                                                                       |                                                        |                                                            | $\geq 10\%$ loss vs. $\pm 5\%$ | 0.67 (0.42-1.05)   |                                                                                                                                                                                                                                              |                                                                                                                                                                                                                                                                                                    |
|                                                                                                                                                                                                                  |                                                                                                                                                                                                                                                |                                             |                                                                                                                                                       |                                                        |                                                            | 5-10% gain vs. $\pm 5\%$       | 1.05 (0.84-1.31)   |                                                                                                                                                                                                                                              |                                                                                                                                                                                                                                                                                                    |
|                                                                                                                                                                                                                  |                                                                                                                                                                                                                                                |                                             |                                                                                                                                                       |                                                        |                                                            | $\geq 10\%$ gain vs. $\pm 5\%$ | 1.24 (1.00 - 1.53) |                                                                                                                                                                                                                                              |                                                                                                                                                                                                                                                                                                    |

|                                                                                                                                                                                                                                                                                                   |                                                                                                                                                                                                         |                                                    |                                                                                                                                                                      |                                                                                                                                                                          |                                     |                                    |                                    |                                                                                                                                                                                                                                                                                                                                                                                                                                                                                                                                                                                                     |
|---------------------------------------------------------------------------------------------------------------------------------------------------------------------------------------------------------------------------------------------------------------------------------------------------|---------------------------------------------------------------------------------------------------------------------------------------------------------------------------------------------------------|----------------------------------------------------|----------------------------------------------------------------------------------------------------------------------------------------------------------------------|--------------------------------------------------------------------------------------------------------------------------------------------------------------------------|-------------------------------------|------------------------------------|------------------------------------|-----------------------------------------------------------------------------------------------------------------------------------------------------------------------------------------------------------------------------------------------------------------------------------------------------------------------------------------------------------------------------------------------------------------------------------------------------------------------------------------------------------------------------------------------------------------------------------------------------|
|                                                                                                                                                                                                                                                                                                   |                                                                                                                                                                                                         |                                                    |                                                                                                                                                                      |                                                                                                                                                                          | Early recurrence (<5 years) (n=396) | 5-10% loss vs. $\pm$ 5%            | 0.71 (0.48-1.04)                   | Age at diagnosis, TNM stage, PR status, chemotherapy, radiotherapy, Surgery, Hormonal therapy, race/ethnicity, menopausal status, Comorbidity, time between exposure measurement and 5-year post-diagnosis date, stratified by study, post diagnosis BMI, Exercise, alcohol intake, smoking,                                                                                                                                                                                                                                                                                                        |
|                                                                                                                                                                                                                                                                                                   |                                                                                                                                                                                                         |                                                    |                                                                                                                                                                      |                                                                                                                                                                          |                                     | $\geq$ 10% loss vs. $\pm$ 5%       | 1.01 (0.66-1.55)                   |                                                                                                                                                                                                                                                                                                                                                                                                                                                                                                                                                                                                     |
|                                                                                                                                                                                                                                                                                                   |                                                                                                                                                                                                         |                                                    |                                                                                                                                                                      |                                                                                                                                                                          |                                     | 5-10% gain vs. $\pm$ 5%            | 0.88 (0.66-1.17)                   |                                                                                                                                                                                                                                                                                                                                                                                                                                                                                                                                                                                                     |
|                                                                                                                                                                                                                                                                                                   |                                                                                                                                                                                                         |                                                    |                                                                                                                                                                      |                                                                                                                                                                          |                                     | $\geq$ 10% gain vs. $\pm$ 5%       | 1.00 (0.75-1.32)                   |                                                                                                                                                                                                                                                                                                                                                                                                                                                                                                                                                                                                     |
| Shariff-Marco S, 2015 <sup>107</sup> , Neighborhoods and Breast Cancer (NABC), (San Francisco Bay Area Breast Cancer Study (SFBCS), Northern California site of the Breast Cancer Family Registry (NC-BCFR)), United States<br><br>Pre- to post-diagnosis weight change - Included, meta-analysis | Prospective cohort study (n= 4347), age range: 18-64 years, pre-menopausal 34.9%, post-menopausal 58.9%, Response rate SFBCS: 84%, NC-BCFR: 83%<br><br>Excluded Native American or mixed race/ethnicity | Diagnosed: 1995-2009, follow up= 7.4 years average | Invasive breast cancer; AJCC stage I 43.7%, II 44.4%, III 7%, IV 1.8% ER+ or PR+ 69.1%; ER-/PR- 21.2%; Unknown HR status 9.7%; Chemotherapy: 55.2%; Radiation: 58.9% | Interviewed (NC-BCFR) or measured (SFBCS) post-diagnosis weight (average 21 months after diagnosis) from self-reported adult height and weight a year prior to diagnosis | All-cause mortality (n=895)         | $\geq$ 2 % loss vs stable $\pm$ 1% | 1.23 (0.92 - 1.63)                 | Age at diagnosis, year of diagnosis, race/ethnicity, Histology, histological grade, ERPR status, first subsequent primary tumour, time to first subsequent primary tumour, type of surgery, chemotherapy, radiation therapy, Marital status, education, History of benign breast disease, menopausal status, age at menarche, number of full-term pregnancies, breastfeeding, years since last full-term pregnancy, History of hormonal contraception use, history of menopausal hormone therapy use, recent recreational physical activity, alcohol intake, stratified by study, pre-diagnosis BMI |
|                                                                                                                                                                                                                                                                                                   |                                                                                                                                                                                                         |                                                    |                                                                                                                                                                      |                                                                                                                                                                          |                                     | 2-10% gain vs stable $\pm$ 1%      | 0.88 (0.65-1.20)                   |                                                                                                                                                                                                                                                                                                                                                                                                                                                                                                                                                                                                     |
|                                                                                                                                                                                                                                                                                                   |                                                                                                                                                                                                         |                                                    |                                                                                                                                                                      |                                                                                                                                                                          |                                     | >10% gain vs stable $\pm$ 1%       | 0.89 (0.65 - 1.21)<br>P trend=0.61 |                                                                                                                                                                                                                                                                                                                                                                                                                                                                                                                                                                                                     |

|                                                          |                                                 |                                              |                        |                                                                                                   |                                          |                                                                                                                                                                                                                   |                                                                                                     |                                                                                                                                                                                                                                                                                                                                                                                                                                                                                                                                                                                   |
|----------------------------------------------------------|-------------------------------------------------|----------------------------------------------|------------------------|---------------------------------------------------------------------------------------------------|------------------------------------------|-------------------------------------------------------------------------------------------------------------------------------------------------------------------------------------------------------------------|-----------------------------------------------------------------------------------------------------|-----------------------------------------------------------------------------------------------------------------------------------------------------------------------------------------------------------------------------------------------------------------------------------------------------------------------------------------------------------------------------------------------------------------------------------------------------------------------------------------------------------------------------------------------------------------------------------|
|                                                          |                                                 |                                              |                        |                                                                                                   | Breast cancer-specific mortality (n=560) | <p>≥2 % loss vs stable ±1%</p> <p>2-10% gain vs stable ±1%</p> <p>&gt;10% gain vs stable ±1%</p>                                                                                                                  | <p>1.35(0.94-1.95)</p> <p>1.09 (0.73-1.63)</p> <p>1.19 (0.79-1.79)</p> <p>P trend=0.25</p>          | Age at diagnosis, year of diagnosis, race/ethnicity, Histology , histological grade, ERPR status, first subsequent primary tumour, time to first subsequent primary tumour, type of surgery, chemotherapy, radiation therapy, Marital status, education, History of benign breast disease, menopausal status, age at menarche, number of full-term pregnancies, breastfeeding, years since last full-term pregnancy, History of hormonal contraception use, history of menopausal hormone therapy use, recent recreational physical activity, alcohol intake, stratified by study |
| Jeon, 2014 <sup>172</sup> , Catholic University of Korea | Retro-spective Study (n=108)                    | Diagnosed: 2005-2010, follow up: Max 5 years | Stage: II 59%, III 49% | Medical record reviewed at diagnosis, after chemotherapy, 12 months, or 24 months after diagnosis | Relapse free survival (n= 16)            | <p>After chemo: Loss ≥5% vs. Stable</p> <p>After chemo: Gain ≥5% vs stable</p> <p>After 12 months: Loss ≥5% vs. Stable</p> <p>After 12 months: Gain ≥5% vs stable</p> <p>After 24 months: Loss ≥5% vs. Stable</p> | <p>Infinite</p> <p>1.2 (0.4-3.4)</p> <p>0.8 (0.2-3.7)</p> <p>1.9 (0.6-5.9)</p> <p>1.6 (0.4-6.2)</p> | Age, BMI at diagnosis, menopausal status, stage, ER and PR status, surgery, comorbidity                                                                                                                                                                                                                                                                                                                                                                                                                                                                                           |
|                                                          | Post-diagnosis weight change - Included, review |                                              |                        |                                                                                                   |                                          |                                                                                                                                                                                                                   |                                                                                                     |                                                                                                                                                                                                                                                                                                                                                                                                                                                                                                                                                                                   |



|                                                                                                                                                                         |                                                                                                                     |                                                 |                                                                                                                                                                                                                                                                            |                                                                                                                                                               |                                           |                                         |                  |                                                                                                                                                               |
|-------------------------------------------------------------------------------------------------------------------------------------------------------------------------|---------------------------------------------------------------------------------------------------------------------|-------------------------------------------------|----------------------------------------------------------------------------------------------------------------------------------------------------------------------------------------------------------------------------------------------------------------------------|---------------------------------------------------------------------------------------------------------------------------------------------------------------|-------------------------------------------|-----------------------------------------|------------------|---------------------------------------------------------------------------------------------------------------------------------------------------------------|
|                                                                                                                                                                         |                                                                                                                     |                                                 |                                                                                                                                                                                                                                                                            |                                                                                                                                                               |                                           | After 24 months: Gain ≥5% vs stable     | 2.4 (0.8-7.5)    |                                                                                                                                                               |
| Ladoire S, 2014 <sup>181</sup> , PACS01 and PAC04 phase I<br><br>Weight change during treatment - Excluded                                                              | Secondary analysis of clinical trials (n=4996) Pre and Post-menopausal mean age:50.556.4% pre, 43.6% post           | Follow Up: Median 5.9 years                     | Tumour grade Unknown: 3% 1: 12.3% 2: 45.1% 3: 39.7% Tumour size (mm): =50 mm: 6% Breast cancer subtypes: HER2+++ :18% Triple negative: 12% RE or RP+ and HER2-: 70.1%. Treatment arm: Six FEC: 50.1% Three FEC+ three docetaxel: 20.2% Six (epirubicin + docetaxel): 29.8% | At baseline before initiation of chemotherapy treatment.                                                                                                      | Overall survival                          | No weight change vs weight change +-10% | P trend= 0.90    | Unadjusted                                                                                                                                                    |
|                                                                                                                                                                         |                                                                                                                     |                                                 |                                                                                                                                                                                                                                                                            |                                                                                                                                                               | Disease-free                              | No weight change vs weight change +-10% | P trend= 0.59    |                                                                                                                                                               |
| Bradshaw PT, 2012 <sup>50</sup> , Long Island Breast Cancer Study Project (LIBCSP), United States<br><br>Pre- to post-diagnosis weight change – Included, meta-analysis | Follow-up of cases from case-control study (n= 1436), mean age:59 years, pre- and postmenopausal, 82% response rate | Diagnosed: 1996-1997, follow up= 8.8 years      | Primary in situ or invasive breast cancer; ER+ 74%, ER- 26%, Unknown 483 patients; PR+ 64%, PR- 36% Unknown 487 patients; Chemotherapy: 41% yes, 59% no, 459 unknown                                                                                                       | Self-reported weight and height 1 year before diagnosis, at diagnosis, 1 year after diagnosis and at time of follow-up<br><br>(about 5 years after diagnosis) | All-cause mortality (n=292)               | >5% loss vs. ±5%                        | 5.29 (3.48-8.09) | Age at diagnosis, chemotherapy, ER status, PR status, Tumour size, pre-diagnosis BMI and weight change                                                        |
|                                                                                                                                                                         |                                                                                                                     |                                                 |                                                                                                                                                                                                                                                                            |                                                                                                                                                               |                                           | 5-10% gain vs. ±5%                      | 1.09 (0.51-2.18) |                                                                                                                                                               |
|                                                                                                                                                                         |                                                                                                                     |                                                 |                                                                                                                                                                                                                                                                            |                                                                                                                                                               |                                           | >10% gain vs. ±5%                       | 2.67 (1.37-5.05) |                                                                                                                                                               |
|                                                                                                                                                                         |                                                                                                                     |                                                 |                                                                                                                                                                                                                                                                            |                                                                                                                                                               | Breast cancer-specific mortality (n= 156) | >5% loss vs. ±5%                        | 7.09 (3.93-13.4) |                                                                                                                                                               |
|                                                                                                                                                                         |                                                                                                                     |                                                 |                                                                                                                                                                                                                                                                            |                                                                                                                                                               |                                           | 5-10% gain vs. ±5%                      | 0.85 (0.24-2.46) |                                                                                                                                                               |
|                                                                                                                                                                         |                                                                                                                     |                                                 |                                                                                                                                                                                                                                                                            |                                                                                                                                                               |                                           | >10% gain vs. ±5%                       | 2.84 (1.15-6.65) |                                                                                                                                                               |
| Brooks JD, 2012 <sup>275</sup> ,<br><br>The Women's Environmental Cancer and Radiation Epidemiology Study (WECARE I), USA And Denmark                                   | Nested Case-control Study (n=1510) Pre- and postmenopausal mean age:45, Cancer 56.4% postmenopausal, mostly white   | Diagnosed: 1985-2000 follow up: Average 4 years | In situ or invasive breast cancer; 65.3% localized, 34.7% regional Chemotherapy: 44.3% yes, 55.7% no; Hormone treatment: 70.7% yes, 29.2% no; Radiation treatment: 70% ever, 30% never                                                                                     | Self-reported First diagnosis and 1 year after                                                                                                                | Pre-menopausal (n=247)                    | >5kg loss vs -5 to <5kg change          | 0.43(0.14-1.30)  | Age at diagnosis, age of menarche, chemotherapy, family history, histology, hormonal therapy, number of full-term pregnancies, radiation therapy, tumor stage |
|                                                                                                                                                                         |                                                                                                                     |                                                 |                                                                                                                                                                                                                                                                            |                                                                                                                                                               | Contralateral breast cancer               | 5-<10kg gain vs -5 to <5kg change       | 1.19(0.67-2.11)  |                                                                                                                                                               |
|                                                                                                                                                                         |                                                                                                                     |                                                 |                                                                                                                                                                                                                                                                            |                                                                                                                                                               |                                           | ≥10kg gain vs -5 to <5kg change         | 0.63(0.32-1.24)  |                                                                                                                                                               |
|                                                                                                                                                                         |                                                                                                                     |                                                 |                                                                                                                                                                                                                                                                            |                                                                                                                                                               | Post-menopausal (n=264)                   | >5kg loss vs -5 to <5kg change          | 0.49(0.15-1.61)  |                                                                                                                                                               |

|                                                                                                                                                                                                                                                                                                                                      |                                                                                                                                                                                              |                                            |                                                                                                                                                                                                                           |                                                                                                                                              |                                         |                                             |                  |                                                                                                                           |
|--------------------------------------------------------------------------------------------------------------------------------------------------------------------------------------------------------------------------------------------------------------------------------------------------------------------------------------|----------------------------------------------------------------------------------------------------------------------------------------------------------------------------------------------|--------------------------------------------|---------------------------------------------------------------------------------------------------------------------------------------------------------------------------------------------------------------------------|----------------------------------------------------------------------------------------------------------------------------------------------|-----------------------------------------|---------------------------------------------|------------------|---------------------------------------------------------------------------------------------------------------------------|
| Post diagnosis weight change - Excluded                                                                                                                                                                                                                                                                                              |                                                                                                                                                                                              |                                            |                                                                                                                                                                                                                           |                                                                                                                                              | Contralateral breast cancer             | 5-<10kg gain vs -5 to <5kg change           | 0.86(0.53-1.40)  |                                                                                                                           |
|                                                                                                                                                                                                                                                                                                                                      |                                                                                                                                                                                              |                                            |                                                                                                                                                                                                                           |                                                                                                                                              |                                         | >=10kg gain vs -5 to <5kg change            | 1.33(0.73-2.42)  |                                                                                                                           |
| Caan BJ, 2012 <sup>52</sup> , After Breast Cancer Pooling Project (ABCPP) (Women's Healthy Eating and Living (WHEL), Life After Cancer Epidemiology (LACE), Nurses' Health Study (NHS), United States and Shanghai Breast Cancer Survival Study (SBCSS), China<br><br>Pre- to post-diagnosis weight change – Included, meta-analysis | Pooled analysis (prospective studies (n= 12915), mean age 57 years, premenopausal 32.2%, postmenopausal 64.6%; Non-Hispanic white 57.8%, Asian 36.4%, Hispanic 2.1%, Non-Hispanic black 1.7% | Diagnosed: 1990-2006, follow up= 8.1 years | Invasive breast cancer, Stage I 46.6%, II 40.8%, III 12.6%; ER+/PR+ 60.8%, ER-/PR+ 4.8% ER+/PR- 14%, ER-/PR- 20.4%; Chemotherapy only 34.5%, Radiation only 19%, Both 31.4%, Hormone therapy 66.8%; Any comorbidity 35.6% | Self-reported weight 1 year before diagnosis, self-report weight (SBCSS, LACE, NHS) or weight measured (WHEL) about 2.1 years post-diagnosis | All-cause mortality (n=1271) U.S. sites | 5-10% loss vs. ±5%                          | 1.20 (0.99-1.45) | Age, Race, menopausal status, stage, Hormone receptor status, positive lymph nodes, Treatment, smoking, pre-diagnosis BMI |
|                                                                                                                                                                                                                                                                                                                                      |                                                                                                                                                                                              |                                            |                                                                                                                                                                                                                           |                                                                                                                                              |                                         | >10% loss vs. ±5%                           | 1.41 (1.14-1.75) |                                                                                                                           |
|                                                                                                                                                                                                                                                                                                                                      |                                                                                                                                                                                              |                                            |                                                                                                                                                                                                                           |                                                                                                                                              |                                         | >10% loss vs. ±5% With comorbidity          | 1.70 (1.29–2.23) |                                                                                                                           |
|                                                                                                                                                                                                                                                                                                                                      |                                                                                                                                                                                              |                                            |                                                                                                                                                                                                                           |                                                                                                                                              |                                         | >10% loss vs. ±5% No comorbidity            | 1.13 (0.77–1.65) |                                                                                                                           |
|                                                                                                                                                                                                                                                                                                                                      |                                                                                                                                                                                              |                                            |                                                                                                                                                                                                                           |                                                                                                                                              |                                         | >10% loss vs. ±5% Underweight/normal weight | 1.74 (1.16–2.60) |                                                                                                                           |
|                                                                                                                                                                                                                                                                                                                                      |                                                                                                                                                                                              |                                            |                                                                                                                                                                                                                           |                                                                                                                                              |                                         | >10% loss vs. ±5% Overweight/Obese          | 1.40 (1.09–1.81) |                                                                                                                           |
|                                                                                                                                                                                                                                                                                                                                      |                                                                                                                                                                                              |                                            |                                                                                                                                                                                                                           |                                                                                                                                              |                                         | >10% loss vs. ±5% Ever smoker               | 1.58 (1.20–2.09) |                                                                                                                           |
|                                                                                                                                                                                                                                                                                                                                      |                                                                                                                                                                                              |                                            |                                                                                                                                                                                                                           |                                                                                                                                              |                                         | >10% loss vs. ±5% Never smoker              | 1.27 (0.91–1.79) |                                                                                                                           |
|                                                                                                                                                                                                                                                                                                                                      |                                                                                                                                                                                              |                                            |                                                                                                                                                                                                                           |                                                                                                                                              |                                         | 5-10% gain vs. ±5%                          | 0.98 (0.83-1.15) |                                                                                                                           |
|                                                                                                                                                                                                                                                                                                                                      |                                                                                                                                                                                              |                                            |                                                                                                                                                                                                                           |                                                                                                                                              |                                         | >10% gain vs. ±5%                           | 1.15 (0.98-1.35) |                                                                                                                           |
|                                                                                                                                                                                                                                                                                                                                      |                                                                                                                                                                                              |                                            |                                                                                                                                                                                                                           |                                                                                                                                              |                                         | With comorbidity >10% gain vs. ±5%          | 1.10 (0.83–1.45) |                                                                                                                           |
|                                                                                                                                                                                                                                                                                                                                      |                                                                                                                                                                                              |                                            |                                                                                                                                                                                                                           |                                                                                                                                              |                                         | >10% gain vs. ±5% No comorbidity            | 1.17 (0.94–1.46) |                                                                                                                           |
|                                                                                                                                                                                                                                                                                                                                      |                                                                                                                                                                                              |                                            |                                                                                                                                                                                                                           |                                                                                                                                              |                                         | >10% gain vs. ±5% Underweight/normal weight | 1.24 (0.98–1.56) |                                                                                                                           |
|                                                                                                                                                                                                                                                                                                                                      |                                                                                                                                                                                              |                                            |                                                                                                                                                                                                                           |                                                                                                                                              |                                         | >10% gain vs. ±5% Overweight/obese          | 1.04 (0.83–1.31) |                                                                                                                           |
| >10% gain vs. ±5% Ever smoker                                                                                                                                                                                                                                                                                                        | 1.20 (0.97–1.48)                                                                                                                                                                             |                                            |                                                                                                                                                                                                                           |                                                                                                                                              |                                         |                                             |                  |                                                                                                                           |

|  |  |  |  |                                                            |                                        |                   |  |
|--|--|--|--|------------------------------------------------------------|----------------------------------------|-------------------|--|
|  |  |  |  |                                                            | >10% gain vs. $\pm$ 5%<br>Never smoker | 1.03 (0.80–1.33)  |  |
|  |  |  |  | All-cause mortality<br>(n=326)<br>Shanghai                 | 5-10% loss vs. $\pm$ 5%                | 1.35 (0.94-1.94)  |  |
|  |  |  |  |                                                            | >10% loss vs. $\pm$ 5%                 | 3.25 (2.24-4.73)  |  |
|  |  |  |  |                                                            | With Comorbidity                       |                   |  |
|  |  |  |  |                                                            | >10% loss vs. $\pm$ 5%                 | 3.68 (2.09–6.47)  |  |
|  |  |  |  |                                                            | No comorbidity                         |                   |  |
|  |  |  |  |                                                            | >10% loss vs. $\pm$ 5%                 | 2.89 (1.71–4.89)  |  |
|  |  |  |  |                                                            | Underweight/ normal<br>weight          |                   |  |
|  |  |  |  |                                                            | >10% loss vs. $\pm$ 5%                 | 4.08 (1.07–2.83)  |  |
|  |  |  |  |                                                            | Overweight/ obese                      |                   |  |
|  |  |  |  |                                                            | 5-10% gain vs. $\pm$ 5%                | 2.62 (1.58–4.36)  |  |
|  |  |  |  |                                                            | >10% gain vs. $\pm$ 5%                 | 0.93 (0.68-1.28)  |  |
|  |  |  |  |                                                            | >10% gain vs. $\pm$ 5%                 | 1.16 (0.84 -1.62) |  |
|  |  |  |  |                                                            | With comorbidity                       |                   |  |
|  |  |  |  |                                                            | >10% gain vs. $\pm$ 5%                 | 1.46 (0.67–3.18)  |  |
|  |  |  |  | No comorbidity                                             |                                        |                   |  |
|  |  |  |  | >10% gain vs. $\pm$ 5%                                     | 1.05 (0.73–1.51)                       |                   |  |
|  |  |  |  | Underweight/ normal<br>weight                              |                                        |                   |  |
|  |  |  |  | >10% gain vs. $\pm$ 5%                                     | 1.20 (0.83–1.75)                       |                   |  |
|  |  |  |  | Overweight/ obese                                          |                                        |                   |  |
|  |  |  |  | >10% gain vs. $\pm$ 5%<br>No<br>subgroup on smoking        | 1.42 (0.67–3.00)                       |                   |  |
|  |  |  |  | Breast cancer-specific<br>mortality (n= 757)<br>U.S. sites | 5-10% loss vs. $\pm$ 5%                | 1.09 (0.84-1.42)  |  |
|  |  |  |  |                                                            | >10% loss vs. $\pm$ 5%                 | 1.13 (0.83-1.56)  |  |

|                                                                                                                                                           |                                                                                                                   |                                            |                                                                                                                                                                                                    |                                                                                   |                                           |                                           |                    |                                                      |
|-----------------------------------------------------------------------------------------------------------------------------------------------------------|-------------------------------------------------------------------------------------------------------------------|--------------------------------------------|----------------------------------------------------------------------------------------------------------------------------------------------------------------------------------------------------|-----------------------------------------------------------------------------------|-------------------------------------------|-------------------------------------------|--------------------|------------------------------------------------------|
|                                                                                                                                                           |                                                                                                                   |                                            |                                                                                                                                                                                                    |                                                                                   |                                           | 5-10% gain vs. $\pm 5\%$                  | 0.97 (0.79-1.19)   |                                                      |
|                                                                                                                                                           |                                                                                                                   |                                            |                                                                                                                                                                                                    |                                                                                   |                                           | >10% gain vs. $\pm 5\%$                   | 1.03 (0.84-1.26)   |                                                      |
|                                                                                                                                                           |                                                                                                                   |                                            |                                                                                                                                                                                                    |                                                                                   | Breast cancer-specific mortality (n= 279) | 5-10% loss vs. $\pm 5\%$                  | 1.54 (1.05-2.28)   |                                                      |
|                                                                                                                                                           |                                                                                                                   |                                            |                                                                                                                                                                                                    |                                                                                   | Shanghai                                  | >10% loss vs. $\pm 5\%$                   | 3.60 (2.39-5.42)   |                                                      |
|                                                                                                                                                           |                                                                                                                   |                                            |                                                                                                                                                                                                    |                                                                                   |                                           | 5-10% gain vs. $\pm 5\%$                  | 1.00 (0.71-1.41)   |                                                      |
|                                                                                                                                                           |                                                                                                                   |                                            |                                                                                                                                                                                                    |                                                                                   |                                           | >10% gain vs. $\pm 5\%$                   | 1.25 (0.88-1.77)   |                                                      |
| Bradshaw PT, 2010 <sup>273</sup> , Long Island Breast Cancer Study Project (LIBCSP), United States<br><br>Pre- to-post-diagnosis weight change – Excluded | Follow-up of cases of population-based case-control study (n=1436), mean age:58.79 years, pre- and postmenopausal | Diagnosed: 1996-1997, follow up= 8.8 years | 35.5% ER+, 22.1% ER-, 42.4% missing among those with data; 42.4% PR+, 23.7% PR-, 33.9% missing Tumour size >2cm: 16.3% yes, 52.2% no, 31.5% missing Chemotherapy: 28.1% yes, 39.9% no, 32% missing | Pre-to-post-diagnosis weight change<br><br>Post-treatment; 1 year after diagnosis | All-cause mortality                       | 5% loss vs. maintain within 5%            | 4.48(2.53-7.92)    | Age, chemotherapy, ER status, PR status, Tumour size |
|                                                                                                                                                           |                                                                                                                   |                                            |                                                                                                                                                                                                    |                                                                                   |                                           | 5-10%gain vs. maintain within 5%          | 0.89(0.32-2.2)     |                                                      |
|                                                                                                                                                           |                                                                                                                   |                                            |                                                                                                                                                                                                    |                                                                                   |                                           | >10% gain vs. maintain within 5%          | 1.75 (0.76 - 3.97) |                                                      |
|                                                                                                                                                           |                                                                                                                   |                                            |                                                                                                                                                                                                    |                                                                                   |                                           | 5% loss vs. maintain within 5%            | 8.58(3.67-21.98)   |                                                      |
|                                                                                                                                                           |                                                                                                                   |                                            |                                                                                                                                                                                                    |                                                                                   |                                           | 5-10%gain vs. maintain within 5%          | 1.0(0.91-3.94)     |                                                      |
|                                                                                                                                                           |                                                                                                                   |                                            |                                                                                                                                                                                                    |                                                                                   |                                           | >10% gain vs. maintain within 5%          | 1.65 (0.46 - 5.58) |                                                      |
| Chen X, 2010 <sup>55</sup> , Shanghai Breast Cancer Survival                                                                                              | Prospective cohort study of cancer survivors                                                                      | Average 6.5 months from diagnosis to study | Invasive and in situ breast cancer; Stage 0-I 36.4%; IIA 32.6%, IIB                                                                                                                                | Self-reported weight at 1 year prior to diagnosis                                 | All-cause mortality (n=291)               | Pre to 18m post >1 kg loss vs. $\pm 1$ kg | 2.41 (1.62-3.58)   | Age at diagnosis, education, Income, Marital status, |

|                                                                                           |                                                                                                              |                                                                            |                                                                                                                                                                                                  |                                                                                                                                                     |                                              |                                      |                   |                                                                                                                                                                                                                                                                                 |
|-------------------------------------------------------------------------------------------|--------------------------------------------------------------------------------------------------------------|----------------------------------------------------------------------------|--------------------------------------------------------------------------------------------------------------------------------------------------------------------------------------------------|-----------------------------------------------------------------------------------------------------------------------------------------------------|----------------------------------------------|--------------------------------------|-------------------|---------------------------------------------------------------------------------------------------------------------------------------------------------------------------------------------------------------------------------------------------------------------------------|
| Study (SBCSS), China<br>Pre-to-post-diagnosis weight change – Excluded                    | (n= 5042), mean age: 53.5 years, Pre- and postmenopausal (51.1%) , Response rate 80%                         | enrolment, Follow up= 46 months , Calendar year: 2002-2006                 | 16.6%, III-IV 9.8%; ER+/PR+ 49.9%; ER-/PR- 27.6%; ER+/PR- or ER-/PR+ 20.4%; Mastectomy: 93.9%, Chemotherapy: 91.2%, Radiotherapy: 32.1%; Tamoxifen: 52%, Comorbidity 20%                         | and at diagnosis, weight measured approximately 6 and 18 months after diagnosis<br><br>Weight change from pre-diagnosis to 18 months post-diagnosis |                                              | 1-5 kg gain vs. ±1 kg                | 1.89 (1.27-2.82)  | Comorbidity, Exercise, Meat intake, Cruciferous vegetables, Soy protein, Time from diagnosis to randomization, menopausal status, Menopausal symptoms, chemotherapy, Surgery type, radiotherapy, Tamoxifen use, Receptor status, Nodal status, Immunotherapy, pre-diagnosis BMI |
|                                                                                           |                                                                                                              |                                                                            |                                                                                                                                                                                                  |                                                                                                                                                     |                                              | ≥5 kg gain vs. ±1 kg                 | 1.71 (1.12-2.60)  |                                                                                                                                                                                                                                                                                 |
|                                                                                           |                                                                                                              |                                                                            |                                                                                                                                                                                                  |                                                                                                                                                     |                                              | Pre to 6m post >1 kg loss vs. ±1 kg  | 2.41 (1.62- 3.58) |                                                                                                                                                                                                                                                                                 |
|                                                                                           |                                                                                                              |                                                                            |                                                                                                                                                                                                  |                                                                                                                                                     |                                              | 1-5 kg gain vs. ±1 kg                | 1.89 1.27- 2.82   |                                                                                                                                                                                                                                                                                 |
|                                                                                           |                                                                                                              |                                                                            |                                                                                                                                                                                                  |                                                                                                                                                     |                                              | ≥5 kg gain vs. ±1 kg                 | 1.71 1.12, 2.60   |                                                                                                                                                                                                                                                                                 |
|                                                                                           |                                                                                                              |                                                                            |                                                                                                                                                                                                  |                                                                                                                                                     | Relapse/ disease-specific mortality (n= 251) | Pre to 18m post >1 kg loss vs. ±1 kg | 1.60 (1.03-2.48)  |                                                                                                                                                                                                                                                                                 |
|                                                                                           |                                                                                                              |                                                                            |                                                                                                                                                                                                  |                                                                                                                                                     |                                              | 1-5 kg gain vs. ±1 kg                | 1.97 (1.30-2.97)  |                                                                                                                                                                                                                                                                                 |
|                                                                                           |                                                                                                              |                                                                            |                                                                                                                                                                                                  |                                                                                                                                                     |                                              | ≥5 kg gain vs. ±1 kg                 | 1.90 (1.23-2.93)  |                                                                                                                                                                                                                                                                                 |
|                                                                                           |                                                                                                              |                                                                            |                                                                                                                                                                                                  |                                                                                                                                                     |                                              | Pre to 6 m post >1 kg loss vs. ±1 kg | 1.13 (0.87-1.48)  |                                                                                                                                                                                                                                                                                 |
|                                                                                           |                                                                                                              |                                                                            |                                                                                                                                                                                                  |                                                                                                                                                     |                                              | 1-5 kg gain vs. ±1 kg                | 1.10 (0.85- 1.43) |                                                                                                                                                                                                                                                                                 |
| ≥5 kg gain vs. ±1 kg                                                                      | 1.31 (0.97- 1.75)                                                                                            |                                                                            |                                                                                                                                                                                                  |                                                                                                                                                     |                                              |                                      |                   |                                                                                                                                                                                                                                                                                 |
| Thivat E, 2010 <sup>204</sup> , Jean Perrin Center, Clermont-Ferrand Review Study, France | Retro-spective Cohort of Cancer Survivors (n=111), mean age:54 years, 45% premenopausal, 55% post-menopausal | Follow Up: Average ranged from 19.4-27.6 years; loss to follow-up: 0% lost | Early stage and locally advanced breast cancer; 19% T1, 44% T2, 15% T3, 22% T4; 8% patients had Scarff-Bloom-Richardson Grade I, 55% II, 20% III Anthracycline-based chemotherapy: all patients; | Measured at the beginning of treatment and in the last chemotherapy cycle                                                                           | Overall survival (n=57)                      | >5% vs <5%                           | 2.11(1.21-3.66)   | BMI, hormonal therapy, menopausal status, nodal status, tumor stage                                                                                                                                                                                                             |
|                                                                                           |                                                                                                              |                                                                            |                                                                                                                                                                                                  |                                                                                                                                                     | Disease-free survival (n=55)                 | >5% vs <5%                           | 2.28(1.29-4.03)   |                                                                                                                                                                                                                                                                                 |

|                                                                                                                                                             |                                                                                                                                                                                                                                                                                              |                                                                                                                    |                                                                                                                                                                                             |                                                                                                                                                                     |                                          |                                    |                   |                                                                                                                                                           |
|-------------------------------------------------------------------------------------------------------------------------------------------------------------|----------------------------------------------------------------------------------------------------------------------------------------------------------------------------------------------------------------------------------------------------------------------------------------------|--------------------------------------------------------------------------------------------------------------------|---------------------------------------------------------------------------------------------------------------------------------------------------------------------------------------------|---------------------------------------------------------------------------------------------------------------------------------------------------------------------|------------------------------------------|------------------------------------|-------------------|-----------------------------------------------------------------------------------------------------------------------------------------------------------|
| Weight change during treatment<br>- Included, review                                                                                                        |                                                                                                                                                                                                                                                                                              |                                                                                                                    | Tumourectomy: 66 patients; Mastectomy: 44 patients; Radiation: 97% (after chemotherapy); Hormonal therapy: 44% (90% with tamoxifen)                                                         |                                                                                                                                                                     |                                          |                                    |                   |                                                                                                                                                           |
| Nichols HB, 2009 <sup>100</sup> , Collaborative Women's Longevity Study (CWLS), United States<br><br>Pre-to-post-diagnosis weight change – Included, review | Follow-up of cases from case-control studies (final n= 3993), mean age:58.4 years, Pre- and postmenopausal, white >98%<br><br>Excluded women with metastatic or unknown stage of disease (n= 649), breast cancer recurrence before enrolment (n= 553), or unintentional weight loss (n= 262) | Diagnosed: 1988-1999, recruited on average 5.8 years after diagnosis, follow up= 6.3 years, response rate 40%      | Invasive non-metastatic breast cancer; Local 64.1%, Regional 24.7%, Distant 0.6%, Unknown stage 10.6%                                                                                       | Self-reported weight in questionnaire<br><br>Weight change from 1-5 years before diagnosis to within the past year of enrolment (average 5.8 years after diagnosis) | Total mortality (n=421)                  | Loss 10 to 50 kg vs -2 to 2 kg     | 2.66 (1.73, 4.07) | Age, Tumour stage, time from diagnosis to exposure assessment, family history, smoking, Physical activity, menopausal status, pre-diagnosis weight        |
|                                                                                                                                                             |                                                                                                                                                                                                                                                                                              |                                                                                                                    |                                                                                                                                                                                             |                                                                                                                                                                     |                                          | Gain 10.1 to 103 kg vs. -2 to 2 kg | 1.7 (1.21 - 2.41) |                                                                                                                                                           |
|                                                                                                                                                             |                                                                                                                                                                                                                                                                                              |                                                                                                                    |                                                                                                                                                                                             |                                                                                                                                                                     |                                          | Per 5 kg decrease                  | 1.24 (1.07-1.43)  |                                                                                                                                                           |
|                                                                                                                                                             |                                                                                                                                                                                                                                                                                              |                                                                                                                    |                                                                                                                                                                                             |                                                                                                                                                                     |                                          | Per 5 kg increase                  | 1.12 (1.04-1.22)  |                                                                                                                                                           |
|                                                                                                                                                             |                                                                                                                                                                                                                                                                                              |                                                                                                                    |                                                                                                                                                                                             |                                                                                                                                                                     | Breast cancer-specific mortality (n=121) | Loss 10 to 50 kg vs -2 to 2 kg     | 0.64 (0.15-2.79)  |                                                                                                                                                           |
|                                                                                                                                                             |                                                                                                                                                                                                                                                                                              |                                                                                                                    |                                                                                                                                                                                             |                                                                                                                                                                     |                                          | Gain 10.1 to 103 Kg vs. -2 to 2 kg | 1.78 (1.01 -3.14) |                                                                                                                                                           |
|                                                                                                                                                             |                                                                                                                                                                                                                                                                                              |                                                                                                                    |                                                                                                                                                                                             |                                                                                                                                                                     |                                          | Per 5 kg decrease                  | 0.79 (0.42-1.47)  |                                                                                                                                                           |
|                                                                                                                                                             |                                                                                                                                                                                                                                                                                              |                                                                                                                    |                                                                                                                                                                                             |                                                                                                                                                                     |                                          | Per 5 kg increase                  | 1.13 (1.03-1.25)  |                                                                                                                                                           |
|                                                                                                                                                             |                                                                                                                                                                                                                                                                                              |                                                                                                                    |                                                                                                                                                                                             |                                                                                                                                                                     | CVD mortality (n=95)                     | Loss 10 to 50 kg vs -2 to 2 kg     | 1.08 (0.42, 2.78) |                                                                                                                                                           |
|                                                                                                                                                             |                                                                                                                                                                                                                                                                                              |                                                                                                                    |                                                                                                                                                                                             |                                                                                                                                                                     |                                          | Gain 10.1 to 103 Kg vs. -2 to 2 kg | 1.73 (0.83, 3.62) |                                                                                                                                                           |
|                                                                                                                                                             |                                                                                                                                                                                                                                                                                              |                                                                                                                    |                                                                                                                                                                                             |                                                                                                                                                                     |                                          | Per 5 kg decrease                  | 1.02 (0.75-1.40)  |                                                                                                                                                           |
|                                                                                                                                                             |                                                                                                                                                                                                                                                                                              |                                                                                                                    |                                                                                                                                                                                             |                                                                                                                                                                     |                                          | Per 5 kg increase                  | 1.19 (1.01-1.40)  |                                                                                                                                                           |
| Caan BJ, 2008 <sup>51</sup> , (Life After Cancer Epidemiology (LACE), United States<br><br>Pre-to-post-diagnosis weight                                     | Prospective cohort study, (n= 1692), mean age:58.3 years, Pre- and postmenopausal                                                                                                                                                                                                            | Diagnosed: 1997-2000; Entered study on average 1.9 years post-diagnosis, follow up: 83.9 months; Response rate 46% | Stage I-IIIa invasive breast cancer; 1551 ER+/PR+; 348 ER-/PR-; 343 others HR status; 793 node+; 1363 node-cases; 423 patients chemotherapy, 552 patients radiotherapy, 855 patients chemo- | Self-reported pre-diagnosis weight and weight at study entry and height, 11-39 months (average 22.7) after diagnosis                                                | All-cause mortality (n=160)              | 5-10% loss vs. ±5%                 | 1.1 (0.6-1.9)     | Tumour stage, Age at diagnosis, Tamoxifen use, Treatment, Nodal status, oestrogen receptor level, progesterone receptor level, smoking, Physical activity |
|                                                                                                                                                             |                                                                                                                                                                                                                                                                                              |                                                                                                                    |                                                                                                                                                                                             |                                                                                                                                                                     |                                          | ≥10% loss vs. ±5%                  | 2.1 (1.3-3.4)     |                                                                                                                                                           |
|                                                                                                                                                             |                                                                                                                                                                                                                                                                                              |                                                                                                                    |                                                                                                                                                                                             |                                                                                                                                                                     |                                          | 5-10% gain vs. ±5%                 | 1.2 (0.8-1.9)     |                                                                                                                                                           |
|                                                                                                                                                             |                                                                                                                                                                                                                                                                                              |                                                                                                                    |                                                                                                                                                                                             |                                                                                                                                                                     |                                          | ≥10% gain vs. ±5%                  | 0.7 (0.4-1.2)     |                                                                                                                                                           |
|                                                                                                                                                             |                                                                                                                                                                                                                                                                                              |                                                                                                                    |                                                                                                                                                                                             |                                                                                                                                                                     | Total mortality (n=98)<br>ER+/PR+        | 5-10% loss vs. ±5%                 | 1.0 (0.5-2.0)     |                                                                                                                                                           |
|                                                                                                                                                             |                                                                                                                                                                                                                                                                                              |                                                                                                                    |                                                                                                                                                                                             |                                                                                                                                                                     |                                          | ≥10% loss vs. ±5%                  | 1.8 (0.9-3.3)     |                                                                                                                                                           |

|                                             |                    |               |                                                                                        |  |  |                                                                    |                      |                |
|---------------------------------------------|--------------------|---------------|----------------------------------------------------------------------------------------|--|--|--------------------------------------------------------------------|----------------------|----------------|
| change –<br>Excluded                        |                    |               | and radiotherapy, 1610 patients current tamoxifen use, 153 patients past tamoxifen use |  |  | 5-10% gain vs. ±5%                                                 | 1.1 (0.6 -1.9)       |                |
|                                             |                    |               |                                                                                        |  |  | ≥10% gain vs. ±5%                                                  | 0.7 (0.4-1.3)        |                |
|                                             |                    |               |                                                                                        |  |  | Total mortality (n=64)<br>ER- or PR-                               | 5-10% loss vs. ±5%   | 1.1 (0.5-2.7)  |
|                                             |                    |               |                                                                                        |  |  |                                                                    | ≥10% loss vs. ±5%    | 2.5 (1.1-5.5)  |
|                                             |                    |               |                                                                                        |  |  |                                                                    | 5-10% gain vs. ±5%   | 1.3 (0.7-2.6)  |
|                                             |                    |               |                                                                                        |  |  |                                                                    | ≥10% gain vs. ±5%    | 0.8 (0.4-1.8)  |
|                                             |                    |               |                                                                                        |  |  |                                                                    | P interaction = 0.95 |                |
|                                             |                    |               |                                                                                        |  |  | Total mortality (n=110)<br>Pre-diagnosis BMI <30 kg/m <sup>2</sup> | 5-10% loss vs. ±5%   | 1.4 (0.8-2.7)  |
|                                             |                    |               |                                                                                        |  |  |                                                                    | ≥10% loss vs. ±5%    | 1.6 (0.8- 3.5) |
|                                             |                    |               |                                                                                        |  |  |                                                                    | 5-10% gain vs. ±5%   | 1.2 (0.7- 2.0) |
|                                             |                    |               |                                                                                        |  |  |                                                                    | ≥10% gain vs. ±5%    | 0.7 (0.4- 1.3) |
|                                             |                    |               |                                                                                        |  |  | Total mortality (n=52)<br>Pre-diagnosis BMI ≥30 kg/m <sup>2</sup>  | 5-10% loss vs. ±5%   | 0.4 (0.1-1.5)  |
|                                             |                    |               |                                                                                        |  |  |                                                                    | ≥10% loss vs. ±5%    | 2.8 (1.4-5.6)  |
|                                             |                    |               |                                                                                        |  |  |                                                                    | 5-10% gain vs. ±5%   | 1.1 (0.4-2.8)  |
|                                             |                    |               |                                                                                        |  |  |                                                                    | ≥10% gain vs. ±5%    | 0.8 (0.3-2.1)  |
|                                             |                    |               |                                                                                        |  |  | P interaction: 0.40                                                |                      |                |
|                                             |                    |               |                                                                                        |  |  | Breast cancer recurrence (n=207)                                   | 5-10% loss vs. ±5%   | 0.9 (0.6-1.5)  |
|                                             |                    |               |                                                                                        |  |  |                                                                    | ≥10% loss vs. ±5%    | 1.7 (1.0-2.6)  |
|                                             |                    |               |                                                                                        |  |  |                                                                    | 5-10% gain vs. ±5%   | 0.8 (0.5-1.2)  |
|                                             |                    |               |                                                                                        |  |  |                                                                    | ≥10% gain vs. ±5%    | 0.8 (0.5-1.2)  |
| Breast cancer recurrence (n=123)<br>ER+/PR+ | 5-10% loss vs. ±5% | 0.8 (0.4-1.5) |                                                                                        |  |  |                                                                    |                      |                |
|                                             | ≥10% loss vs. ±5%  | 1.3 (0.7-2.5) |                                                                                        |  |  |                                                                    |                      |                |
|                                             | 5-10% gain vs. ±5% | 0.7 (0.4-1.3) |                                                                                        |  |  |                                                                    |                      |                |
|                                             | ≥10% gain vs. ±5%  | 0.6 (0.4-1.1) |                                                                                        |  |  |                                                                    |                      |                |

|                                                                                                                                                                         |                                                                                                                                                                                 |                                                                                                 |                                                                                                                                                                                                                                      |                                                       |                                                                                  |                                                                                                                          |                                                                                           |  |
|-------------------------------------------------------------------------------------------------------------------------------------------------------------------------|---------------------------------------------------------------------------------------------------------------------------------------------------------------------------------|-------------------------------------------------------------------------------------------------|--------------------------------------------------------------------------------------------------------------------------------------------------------------------------------------------------------------------------------------|-------------------------------------------------------|----------------------------------------------------------------------------------|--------------------------------------------------------------------------------------------------------------------------|-------------------------------------------------------------------------------------------|--|
|                                                                                                                                                                         |                                                                                                                                                                                 |                                                                                                 |                                                                                                                                                                                                                                      |                                                       | Breast cancer recurrence (n=84)<br>ER- or PR-                                    | 5-10% loss vs. $\pm 5\%$<br>$\geq 10\%$ loss vs. $\pm 5\%$<br>5-10% gain vs. $\pm 5\%$<br>$\geq 10\%$ gain vs. $\pm 5\%$ | 1.1 (0.5-2.4)<br>2.1 (1.0-4.4)<br>0.8 (0.4-1.6)<br>1.2 (0.7-2.2)<br>P interaction = 0.53  |  |
|                                                                                                                                                                         |                                                                                                                                                                                 |                                                                                                 |                                                                                                                                                                                                                                      |                                                       | Breast cancer recurrence (n=149)<br>Pre-diagnosis BMI <30 kg/m <sup>2</sup>      | 5-10% loss vs. $\pm 5\%$<br>$\geq 10\%$ loss vs. $\pm 5\%$<br>5-10% gain vs. $\pm 5\%$<br>$\geq 10\%$ gain vs. $\pm 5\%$ | 1.1 (0.6-2.0)<br>1.4 (0.7-2.8)<br>0.9 (0.5-1.4)<br>0.8 (0.5-1.2)                          |  |
|                                                                                                                                                                         |                                                                                                                                                                                 |                                                                                                 |                                                                                                                                                                                                                                      |                                                       | Breast cancer recurrence (n=58)<br>Pre-diagnosis BMI $\geq 30$ kg/m <sup>2</sup> | 5-10% loss vs. $\pm 5\%$<br>$\geq 10\%$ loss vs. $\pm 5\%$<br>5-10% gain vs. $\pm 5\%$<br>$\geq 10\%$ gain vs. $\pm 5\%$ | 0.5 (0.2-1.4)<br>2.5 (1.2-5.1)<br>0.7 (0.2- 1.9)<br>1.0 (0.4-2.4)<br>P interaction = 0.47 |  |
| Makari-Judson G, 2007 <sup>406</sup> , Review of a Oncology Practise and Clinical Trials Participants, US, United States<br><br>Weight change post diagnosis - Excluded | Retrospective cohort study (n=185) Pre- and postmenopausal mean age:50.8, Cancer Diagnosis: 1997-2002 50% pre-treatment postmenopausal, 24% treatment-associated menopause, 26% | Diagnosed: 1997-2002 follow Up: Maximum 38 months, Loss to Follow-up: 12 patients lost, Unknown | Invasive breast cancer; AJCC; 34% Stage I, 34% Stage IIA, 23% Stage IIB, 6% Stage IIIA, 3% Stage IIIB 60% breast-conserving therapy, 40% mastectomy; systemic adjuvant therapy: 4% none, 27% hormonal therapy, 30% chemotherapy, 39% | At diagnosis, during treatment, 1,2 and 3 years later | Overall Survival                                                                 | $\leq 2.5$ kg gain                                                                                                       | Log-rank test: P=0.58                                                                     |  |



|                                                                                                                                                                                                      |                                                                                                                                                                                                       |                                                                                    |                                                                                                                             |                                                                                                                                                                      |                               |                                |                  |                                                                                                     |                                           |                  |                                                                                                                                                                                                           |
|------------------------------------------------------------------------------------------------------------------------------------------------------------------------------------------------------|-------------------------------------------------------------------------------------------------------------------------------------------------------------------------------------------------------|------------------------------------------------------------------------------------|-----------------------------------------------------------------------------------------------------------------------------|----------------------------------------------------------------------------------------------------------------------------------------------------------------------|-------------------------------|--------------------------------|------------------|-----------------------------------------------------------------------------------------------------|-------------------------------------------|------------------|-----------------------------------------------------------------------------------------------------------------------------------------------------------------------------------------------------------|
|                                                                                                                                                                                                      | post-treatment premenopausal                                                                                                                                                                          |                                                                                    | both hormonal and chemotherapy                                                                                              |                                                                                                                                                                      |                               | >2.5 kg gain                   |                  |                                                                                                     |                                           |                  |                                                                                                                                                                                                           |
| Abrahamson, 2006 <sup>39</sup> , Atlanta, Seattle, New Jersey, United States<br><br>Pre- to post-diagnosis weight change – Included, review<br><br>Weight change during treatment – Included, review | Follow-up of cases in case-control study (n=1254), age range: 20-54 years; Pre-(78%) and postmenopausal (22%); White 75%, Non-white 25%; 86% completed interviews at median 4.2 months post-diagnosis | Diagnosed: 1990-1992 Follow up= 9.8 years, <2% loss to follow-up                   | Invasive breast cancer<br><br>Local 57%; Regional 40%; Distant 3%; ER+ 56%; ER- 35%; Borderline 3%; Unknown 6%              | Self-reported height and weight at age 20 years. Weight measured at interview<br><br>Weight change from age 20 years to interview (median 4.2 months post-diagnosis) | Overall mortality (n=275)     | >3% loss vs. $\pm 3\%$         | 1.44 (0.78-2.67) | Tumour stage, Income, BMI                                                                           |                                           |                  |                                                                                                                                                                                                           |
|                                                                                                                                                                                                      |                                                                                                                                                                                                       |                                                                                    |                                                                                                                             |                                                                                                                                                                      |                               | 3.1-25% gain vs. $\pm 3\%$     | 1.03 (0.66-1.62) |                                                                                                     |                                           |                  |                                                                                                                                                                                                           |
|                                                                                                                                                                                                      |                                                                                                                                                                                                       |                                                                                    |                                                                                                                             |                                                                                                                                                                      |                               | >25% gain vs. $\pm 3\%$        | 1.36 (0.88-2.12) |                                                                                                     | P trend=0.16                              |                  |                                                                                                                                                                                                           |
|                                                                                                                                                                                                      |                                                                                                                                                                                                       |                                                                                    |                                                                                                                             |                                                                                                                                                                      |                               |                                |                  | Overall mortality                                                                                   | Lost >3% vs. maintenance $\pm 3\%$        | 1.27 (0.93-1.74) | Waist-hip-ratio, BMI, tumour stage, Income<br><br>(Tested other covariates, no change to estimate by >10% and not included in final model<br><br>No confounding or modifying effects of treatment status) |
|                                                                                                                                                                                                      |                                                                                                                                                                                                       |                                                                                    |                                                                                                                             |                                                                                                                                                                      |                               |                                |                  |                                                                                                     | Gained 3.1-8.0% vs. maintenance $\pm 3\%$ | 0.81 (0.57-1.14) |                                                                                                                                                                                                           |
|                                                                                                                                                                                                      |                                                                                                                                                                                                       |                                                                                    |                                                                                                                             |                                                                                                                                                                      |                               |                                |                  |                                                                                                     | Gained >8% vs. maintenance $\pm 3\%$      | 0.86 (0.63-1.18) |                                                                                                                                                                                                           |
| Caan B, 2006 <sup>146</sup> , Women's Healthy Eating and Living (WHEL) and Life After Cancer Epidemiology                                                                                            | Pooled analysis of prospective studies (n= 3215), mean age: 58.8                                                                                                                                      | Diagnosed within 39 months (LACE) or 48 months (WHEL) of enrolment (enrolled 1995- | Stage I 43.7%, II 52.7%, IIIA 3.6%; ER+ 78.2%, PR+ 69.3%; Surgery type: mastectomy 50.7%, conserving 49.3%; No radiation/no | Self-reported pre-diagnosis (1 year prior) weight (LACE, WHEL)                                                                                                       | Breast cancer relapse (n=141) | 5-10% loss vs. $\pm 5\%$       | 0.9 (0.5-1.6)    | Age, stage, tamoxifen use, treatment, number of positive nodes, progesterone and oestrogen receptor |                                           |                  |                                                                                                                                                                                                           |
|                                                                                                                                                                                                      |                                                                                                                                                                                                       |                                                                                    |                                                                                                                             |                                                                                                                                                                      | LACE                          | $\geq 10\%$ loss vs. $\pm 5\%$ | 1.4 (0.7-2.5)    |                                                                                                     |                                           |                  |                                                                                                                                                                                                           |
|                                                                                                                                                                                                      |                                                                                                                                                                                                       |                                                                                    |                                                                                                                             |                                                                                                                                                                      |                               | 5-10% gain vs. $\pm 5\%$       | 0.9 (0.5-1.4)    |                                                                                                     |                                           |                  |                                                                                                                                                                                                           |

|                                                                                                                                                                    |                                                                                                           |                                                                                                             |                                                                                                                                                                     |                                                                                                                                                               |                                                                |                                                                  |                       |                                                                                                                       |
|--------------------------------------------------------------------------------------------------------------------------------------------------------------------|-----------------------------------------------------------------------------------------------------------|-------------------------------------------------------------------------------------------------------------|---------------------------------------------------------------------------------------------------------------------------------------------------------------------|---------------------------------------------------------------------------------------------------------------------------------------------------------------|----------------------------------------------------------------|------------------------------------------------------------------|-----------------------|-----------------------------------------------------------------------------------------------------------------------|
| (LACE), United States<br><br>Pre-to-post-diagnosis weight change – Excluded                                                                                        | years, Pre- and postmenopausal                                                                            | 2002); all completed primary cancer treatment at enrolment<br><br>Follow up= 5 years (LACE), 7 years (WHEL) | chemotherapy 15.1%, Chemotherapy only 22.5%, Radiation only 23% Chemotherapy and radiation 39.4%; Tamoxifen use at diagnosis: never 28.5%, past 6.6%, current 64.9% | Self-reported post-diagnosis weight and height (LACE) or measured post-diagnosis weight and height (WHEL) at study enrolment (median 2 years since diagnosis) |                                                                | ≥10% gain vs. ±5%                                                | 0.8 (0.5-1.3)         | status, pre-diagnosis BMI<br><br>BMI, Age at diagnosis, treatment, tumor stage, Nodal status, Hormone receptor status |
|                                                                                                                                                                    |                                                                                                           |                                                                                                             |                                                                                                                                                                     |                                                                                                                                                               | Breast cancer relapse (n=192)<br><br>WHEL                      | 5-10% loss vs. ±5%                                               | 0.5 (0.2-0.9)         |                                                                                                                       |
|                                                                                                                                                                    |                                                                                                           |                                                                                                             |                                                                                                                                                                     |                                                                                                                                                               |                                                                | ≥10% loss vs. ±5%                                                | 0.7 (0.3-1.4)         |                                                                                                                       |
|                                                                                                                                                                    |                                                                                                           |                                                                                                             |                                                                                                                                                                     |                                                                                                                                                               |                                                                | 5-10% gain vs. ±5%                                               | 0.8 (0.5-1.2)         |                                                                                                                       |
|                                                                                                                                                                    |                                                                                                           |                                                                                                             |                                                                                                                                                                     |                                                                                                                                                               | ≥10% gain vs. ±5%                                              | 1.1 (0.7-1.5)                                                    |                       |                                                                                                                       |
| Costa L, 2002 <sup>407</sup> , Brazilian Breast Cancer Survivors Review Study, Brazil<br><br>Weight change during treatment - Excluded                             | Retrospective cohort study (n=106) Pre- and postmenopausal mean age:49, 47.2% premenopausal               | Follow Up: Average 4.9 months                                                                               | Adjuvant treatment: 69.8% yes; Neoadjuvant: 7.5% yes; Palliative chemotherapy: 22.6%                                                                                | Treatment                                                                                                                                                     | Patients in palliative chemotherapy<br><br>Overall survival    | Weight loss:<br><br>Weight change <0%<br><br>Weight change >= 0% | Log-rank test: P=0.12 |                                                                                                                       |
|                                                                                                                                                                    |                                                                                                           |                                                                                                             |                                                                                                                                                                     |                                                                                                                                                               | Patients in adjuvant chemotherapy<br><br>Disease free survival | Weight gain:<br><br>Weight change <0%<br><br>Weight change >= 0% |                       |                                                                                                                       |
| Marinho LA, 2001 <sup>408</sup> , Campinas Breast Cancer Survivors Follow-up Study, Brazil<br><br>Post-diagnosis weight - Excluded                                 | Prospective cohort study (n=109) Pre- and postmenopausal                                                  | Follow Up: Average 10.4 months                                                                              |                                                                                                                                                                     | After treatment, radiotherapy                                                                                                                                 | Recurrence-free (n=25)                                         | No weight loss<br><br>weight loss                                | p<0.001               |                                                                                                                       |
| Kumar NB, 1997 <sup>409</sup> , H.Lee Moffitt Cancer Center and Research Institute Follow-up Study, United States<br><br>Weight change during treatment - Excluded | Retrospective cohort study (n=200) Mixed age range: 25-85 years, Cancer Diagnosis: 1986-1997 Multi-ethnic | Diagnosed: 1986-1997 follow Up: Maximum 40 months                                                           | Stages IA-IIB All had surgery with or without radiotherapy and tamoxifen, not receiving systemic chemotherapy                                                       | Weight change was defined as observed change in weight from diagnosis to completion of treatment                                                              | Overall survival                                               | Per 1 kg                                                         | Not significant       |                                                                                                                       |
|                                                                                                                                                                    |                                                                                                           |                                                                                                             |                                                                                                                                                                     |                                                                                                                                                               | Recurrence-free survival                                       | Per 1 kg                                                         |                       |                                                                                                                       |

|                                                                                                                          |                                                                                                                                     |                                                                                                                                  |                                                                                         |                                                                           |                          |                                               |                        |                                                                                               |
|--------------------------------------------------------------------------------------------------------------------------|-------------------------------------------------------------------------------------------------------------------------------------|----------------------------------------------------------------------------------------------------------------------------------|-----------------------------------------------------------------------------------------|---------------------------------------------------------------------------|--------------------------|-----------------------------------------------|------------------------|-----------------------------------------------------------------------------------------------|
| Levine, 1991 <sup>309</sup> , United States<br>Weight change during treatment - Excluded                                 | Prospective cohort study (n=32), mean age: 46 years, Pre- and postmenopausal                                                        | Follow up: Over 2 years                                                                                                          | Treatment: CMF with/without prednisone, CAF with/without vinblastine sulfate, melphalan | Within 1 month of adjuvant chemotherapy to 2 years later                  | Breast cancer recurrence | Weight gain vs. no weight gain                | 1.36, not significant  |                                                                                               |
| Camoriano, 1990 <sup>147</sup> , United States<br>Weight change during treatment - Included, review                      | Secondary analysis of clinical trial (n= 545), age range:20-75, Pre- and postmenopausal                                             | Follow-up: 6.6 years Average<br>Weight at 60 weeks was not available in 84% participants including those with disease recurrence | Node-positive breast cancer; Treatment: CMF                                             | Measured post-surgery during and after receiving 60 weeks of chemotherapy | Overall survival         | Weight gain                                   | 1.62 (1.01-2.62)       | Age, Nodal status, estrogen receptor level, Tumor size, Nuclear grade, initial Quetelet index |
|                                                                                                                          |                                                                                                                                     |                                                                                                                                  |                                                                                         |                                                                           | Pre-menopausal           | ≥ median vs. < median at 60 weeks             | P=0.04                 |                                                                                               |
|                                                                                                                          |                                                                                                                                     |                                                                                                                                  |                                                                                         |                                                                           | Overall survival         | Weight gain ≥ median vs. < median at 60 weeks | P = 0.25               |                                                                                               |
|                                                                                                                          |                                                                                                                                     |                                                                                                                                  |                                                                                         |                                                                           | Post-menopausal          | ≥ median vs. < median at 60 weeks             |                        |                                                                                               |
| Relapse-free survival                                                                                                    | Weight gain                                                                                                                         | 1.5                                                                                                                              |                                                                                         |                                                                           |                          |                                               |                        |                                                                                               |
| Pre-menopausal                                                                                                           | ≥ median vs. < median at 60 weeks                                                                                                   | P=0.17                                                                                                                           |                                                                                         |                                                                           |                          |                                               |                        |                                                                                               |
| Relapse-free survival                                                                                                    | Weight gain                                                                                                                         | P = 0.25                                                                                                                         |                                                                                         |                                                                           |                          |                                               |                        |                                                                                               |
| Post-menopausal                                                                                                          | ≥ median vs. < median at 60 weeks                                                                                                   |                                                                                                                                  |                                                                                         |                                                                           |                          |                                               |                        |                                                                                               |
| Goodwin PJ, 1988 <sup>410</sup> , Princess Margaret Hospital, Toronto, Canada<br>Post-diagnosis weight change - Excluded | Retrospective cohort study (n=637) Pre and Post-menopausal mean age:51.3Group 1 35.2% pre, 2 43.9% pre, 3 86.9%, 3A 78.6%, 3B 98.7% |                                                                                                                                  |                                                                                         | Weight at 6 and 12 months after initial visit                             | Breast cancer survival   | Weight gain                                   | P=0.2                  | Age, menopausal status, height, weight, axillary node status                                  |
| Swenerton K, 1979 <sup>411</sup> , United States<br>Pre to post diagnosis weight change - Excluded                       | Retrospective cohort study (n=694), Cancer Diagnosis: Treatment 1973-1976 34.1% premenopausal, 16% early postmenopausal, 42.8% late | Follow-up: Minimum 1 years                                                                                                       | Metastatic breast cancer                                                                | Pre-treatment                                                             | Overall                  | <5%                                           | Breslow's test: P<0.01 |                                                                                               |
|                                                                                                                          |                                                                                                                                     |                                                                                                                                  |                                                                                         |                                                                           |                          | 5-10%                                         |                        |                                                                                               |
|                                                                                                                          |                                                                                                                                     |                                                                                                                                  |                                                                                         |                                                                           |                          | >10%                                          |                        |                                                                                               |

|  |                                 |  |  |  |  |  |  |  |
|--|---------------------------------|--|--|--|--|--|--|--|
|  | postmenopausal,<br>7.1% unknown |  |  |  |  |  |  |  |
|--|---------------------------------|--|--|--|--|--|--|--|

**Supplementary Table S8 Description of studies included in or excluded from the descriptive review of BMI change**

| Author, year, study name, country                                                                                                                              | Study description                                      | Time of diagnosis and follow-up                  | Disease characteristics treatment          | Exposure assessment | Outcome (events)                                     | Contrast                                          | RR (95% CI)     | Covariates                                                                                                                              |
|----------------------------------------------------------------------------------------------------------------------------------------------------------------|--------------------------------------------------------|--------------------------------------------------|--------------------------------------------|---------------------|------------------------------------------------------|---------------------------------------------------|-----------------|-----------------------------------------------------------------------------------------------------------------------------------------|
| Shang L, 2021 <sup>225</sup> , Chicago Multiethnic Epidemiologic Breast Cancer Cohort (ChiMEC), USA<br><br>Pre to post diagnosis BMI change - Included, review | Follow-up of Case-control Study (n=2888), multi-ethnic | Diagnosed: 2000-2017 follow Up: Median 6.4 years | Non-metastatic breast cancer. Stages 0-III | Measured            | Overall survival (n=387)                             | Loss >0.5kg/m2/year vs Stable (<=0.5 kg/m2/year)  | 2.60(1.88-3.59) | Age, charlson comorbidity index, histological grade, molecular subtype, race, tumor stage, radiotherapy, hormonal therapy, chemotherapy |
|                                                                                                                                                                |                                                        |                                                  |                                            |                     |                                                      | Gain >0.5 kg/m2/year vs Stable (<=0.5 kg/m2/year) | 1.60(1.10-2.33) |                                                                                                                                         |
|                                                                                                                                                                |                                                        |                                                  |                                            |                     | Cancer specific mortality (n=190)                    | Loss >0.5kg/m2/year vs Stable (<=0.5kg/m2/year)   | 3.05(1.91-4.86) |                                                                                                                                         |
|                                                                                                                                                                |                                                        |                                                  |                                            |                     |                                                      | Gain >0.5kg/m2/year vs Stable (<=0.5kg/m2/year)   | 1.73(1.04-2.87) |                                                                                                                                         |
|                                                                                                                                                                |                                                        |                                                  |                                            |                     | Disease free survival                                | Loss >0.5kg/m2/year vs Stable (<=0.5kg/m2/year)   | 2.12(1.52-2.96) |                                                                                                                                         |
|                                                                                                                                                                |                                                        |                                                  |                                            |                     |                                                      | Gain >0.5kg/m2/year vs Stable (<=0.5kg/m2/year)   | 1.54(1.06-0.24) |                                                                                                                                         |
|                                                                                                                                                                |                                                        |                                                  |                                            |                     | Normal weight at diagnosis Overall survival (n=47.0) | Loss >0.5kg/m2/year vs Stable (<=0.5kg/m2/year)   | 1.92(0.91-4.05) |                                                                                                                                         |
|                                                                                                                                                                |                                                        |                                                  |                                            |                     |                                                      | Gain >0.5kg/m2/year vs Stable (<=0.5kg/m2/year)   | 0.99(0.45-2.16) |                                                                                                                                         |
|                                                                                                                                                                |                                                        |                                                  |                                            |                     | Overweight at diagnosis Overall survival (n=151.0)   | Loss >0.5kg/m2/year vs Stable (<=0.5kg/m2/year)   | 3.07(1.96-4.80) |                                                                                                                                         |
|                                                                                                                                                                |                                                        |                                                  |                                            |                     |                                                      | Gain >0.5kg/m2/year vs Stable (<=0.5kg/m2/year)   | 1.96(1.14-3.37) |                                                                                                                                         |

|  |  |  |  |  |                                                               |                                                   |                 |  |
|--|--|--|--|--|---------------------------------------------------------------|---------------------------------------------------|-----------------|--|
|  |  |  |  |  | Normal weight at diagnosis Cancer specific mortality (n=24.0) | Loss >0.5kg/m2/year vs Stable (<=0.5kg/m2/year)   | 2.73(0.90-8.31) |  |
|  |  |  |  |  |                                                               | Gain >0.5kg/m2/year vs Stable (<=0.5kg/m2/year)   | 1.33(0.44-4.03) |  |
|  |  |  |  |  | Overweight at diagnosis Cancer specific mortality (n=78.0)    | Loss >0.5kg/m2/year vs Stable (<=0.5kg/m2/year)   | 3.08(1.62-5.87) |  |
|  |  |  |  |  |                                                               | Gain >0.5kg/m2/year vs Stable (<=0.5kg/m2/year)   | 1.47(0.69-3.12) |  |
|  |  |  |  |  | Normal weight at diagnosis Disease free survival (n=44.0)     | Loss >0.5kg/m2/year vs Stable (<=0.5kg/m2/year)   | 1.91(0.87-4.16) |  |
|  |  |  |  |  |                                                               | Gain >0.5kg/m2/year vs Stable (<=0.5kg/m2/year)   | 1.16(0.53-2.55) |  |
|  |  |  |  |  | Overweight at diagnosis Disease free survival (n=147.0)       | Loss >0.5kg/m2/year vs Stable (<=0.5kg/m2/year)   | 2.21(1.41-3.45) |  |
|  |  |  |  |  |                                                               | Gain >0.5kg/m2/year vs Stable (<=0.5kg/m2/year)   | 1.56(0.90-2.71) |  |
|  |  |  |  |  | Overall survival (n=229.0)                                    | Loss >0.5kg/m2/year vs Stable (<=0.5 kg/m2/year)  | 1.69(1.20-2.40) |  |
|  |  |  |  |  |                                                               | Gain >0.5 kg/m2/year vs Stable (<=0.5 kg/m2/year) | 1.10(0.74-1.63) |  |

|                                        |                                                                                    |                                                     |                                                                                                                            |                                                                                                |                                     |                                                 |                             |                                                                                              |
|----------------------------------------|------------------------------------------------------------------------------------|-----------------------------------------------------|----------------------------------------------------------------------------------------------------------------------------|------------------------------------------------------------------------------------------------|-------------------------------------|-------------------------------------------------|-----------------------------|----------------------------------------------------------------------------------------------|
|                                        |                                                                                    |                                                     |                                                                                                                            |                                                                                                | Cancer specific mortality (n=117.0) | Loss >0.5kg/m2/year vs Stable (<=0.5kg/m2/year) | 2.00(1.20-3.34)             |                                                                                              |
|                                        |                                                                                    |                                                     |                                                                                                                            |                                                                                                |                                     | Gain >0.5kg/m2/year vs Stable (<=0.5kg/m2/year) | 1.26(0.72-2.22)             |                                                                                              |
|                                        |                                                                                    |                                                     |                                                                                                                            |                                                                                                | Disease free survival (n=287.0)     | Loss >0.5kg/m2/year vs Stable (<=0.5kg/m2/year) | 1.54(1.13-2.11)             |                                                                                              |
|                                        |                                                                                    |                                                     |                                                                                                                            |                                                                                                |                                     | Gain >0.5kg/m2/year vs Stable (<=0.5kg/m2/year) | 1.16(0.83-1.63)             |                                                                                              |
|                                        |                                                                                    |                                                     |                                                                                                                            |                                                                                                | Overall survival (n=174.0)          | Loss >0.5% vs Stable (<=0.5%)                   | 1.60(1.11-2.31)             |                                                                                              |
|                                        |                                                                                    |                                                     |                                                                                                                            |                                                                                                |                                     | Gain >0.5% vs Stable (<=0.5%)                   | 1.14(0.74-1.81)             |                                                                                              |
|                                        |                                                                                    |                                                     |                                                                                                                            |                                                                                                | Cancer specific mortality (n=91.0)  | Loss >0.5% vs Stable (<=0.5%)                   | 1.63(0.99-2.69)             |                                                                                              |
|                                        |                                                                                    |                                                     |                                                                                                                            |                                                                                                |                                     | Gain >0.5% vs Stable (<=0.5%)                   | 0.95(0.49-1.84)             |                                                                                              |
|                                        |                                                                                    |                                                     |                                                                                                                            |                                                                                                | Disease free survival (n=211.0)     | Loss >0.5% vs Stable (<=0.5%)                   | 1.33(0.95-1.88)             |                                                                                              |
|                                        |                                                                                    |                                                     |                                                                                                                            |                                                                                                |                                     | Gain >0.5% vs Stable (<=0.5%)                   | 1.05(0.70-1.57)             |                                                                                              |
| Fang Q, 2019 <sup>236</sup> , China    | Retrospective cohort study (n=409), Pre/perimenopausal 53.1%, Postmenopausal 46.9% | Diagnosed: 2009-2015, follow up: 43.2 median months | AJCC stage II 65.5%, III 34.5%; ER negative 44.5%, PR negative 63.1%, positive 36.9%<br>Underwent neoadjuvant chemotherapy | Measured BMI from day 1 of the 1st cycle of neoadjuvant chemotherapy to the day before surgery | Overall survival                    | Gain vs stable/loss                             | 1.97 (1.04-3.74)<br>P=0.039 | clinical stage, stage, ER status, PR status, Tumor subtype, PCR status                       |
|                                        |                                                                                    |                                                     |                                                                                                                            |                                                                                                | Disease-free survival               |                                                 | 2.09 (1.28-3.42)<br>P=0.003 | BMI at diagnosis, clinical stage, stage, ER status, PR status, Tumor subtype, PCR status     |
| Flanagan MR, 2018 <sup>132</sup> , USA | Nested case-control study (n=1310), mostly white                                   | Diagnosed with Ductal Carcinoma in situ: 1995-2013, | Breast cancer: Ductal carcinoma in situ. Histology of DCIS (n): 494 mixed, 298 NOS,                                        | BMI change measured from initial DCIS                                                          | Any second breast cancer            | BMI loss >=3 vs BMI change +/-1                 | 1.5 (0.95-2.4)              | Age, year of diagnosis, county, histology, grade, surgery, radiation therapy, survival time, |
|                                        |                                                                                    |                                                     |                                                                                                                            |                                                                                                |                                     | BMI loss >1-<3 vs BMI change +/-1               | 1.0 (0.6-1.4)               |                                                                                              |



|                                                    |               |  |                                                       |                               |  |                                                                                       |                                      |                                                                  |                |  |
|----------------------------------------------------|---------------|--|-------------------------------------------------------|-------------------------------|--|---------------------------------------------------------------------------------------|--------------------------------------|------------------------------------------------------------------|----------------|--|
| Post diagnosis<br>BMI change -<br>Included, review |               |  | 171 Comedo, 158<br>Cribriform, 128 Solid, 61<br>other | diagnosis to<br>referent date |  | BMI gain >1-<3 vs<br>BMI change +/-1                                                  | 1.0 (0.7-1.4)                        | menopausal status at<br>diagnosis, adjuvant<br>endocrine therapy |                |  |
|                                                    |               |  |                                                       |                               |  | BMI gain >/=3 vs<br>BMI change +/-1                                                   | 1.1 (0.7-1.6)                        |                                                                  |                |  |
|                                                    |               |  |                                                       |                               |  |                                                                                       |                                      |                                                                  | P trend= 0.302 |  |
|                                                    |               |  |                                                       |                               |  | Invasive secondary<br>breast cancer                                                   | BMI loss >/3 vs BMI<br>change +/-1   |                                                                  | 1.4 (0.8-2.5)  |  |
|                                                    |               |  |                                                       |                               |  |                                                                                       | BMI loss >1-<3 vs<br>BMI change +/-1 |                                                                  | 0.8 (0.5-1.4)  |  |
|                                                    |               |  |                                                       |                               |  |                                                                                       | BMI gain >1-<3 vs<br>BMI change +/-1 |                                                                  | 1.1 (0.8-1.7)  |  |
|                                                    |               |  |                                                       |                               |  |                                                                                       | BMI gain >/=3 vs<br>BMI change +/-1  |                                                                  | 1.0 (0.6-1.7)  |  |
|                                                    |               |  |                                                       |                               |  |                                                                                       |                                      |                                                                  | P trend=0.572  |  |
|                                                    |               |  |                                                       |                               |  | In situ secondary<br>breast cancer                                                    | BMI loss >/3 vs BMI<br>change +/-1   |                                                                  | 1.7 (0.8-3.8)  |  |
|                                                    |               |  |                                                       |                               |  |                                                                                       | BMI loss >1-<3 vs<br>BMI change +/-1 |                                                                  | 1.3 (0.6-2.5)  |  |
|                                                    |               |  |                                                       |                               |  |                                                                                       | BMI gain >1-<3 vs<br>BMI change +/-1 |                                                                  | 0.7 (0.4-1.3)  |  |
|                                                    |               |  |                                                       |                               |  |                                                                                       | BMI gain >/=3 vs<br>BMI change +/-1  |                                                                  | 1.2 (0.5-2.5)  |  |
|                                                    |               |  |                                                       |                               |  |                                                                                       |                                      |                                                                  | P trend=0.326  |  |
|                                                    |               |  |                                                       |                               |  | Ipsilateral secondary<br>breast cancer<br>Without unilateral<br>mastectomy<br>(n=173) | BMI loss >/3 vs BMI<br>change +/-1   |                                                                  | 0.8 (0.4-1.9)  |  |
|                                                    |               |  |                                                       |                               |  |                                                                                       | BMI loss >1-<3 vs<br>BMI change +/-1 |                                                                  | 1.1 (0.6-2.1)  |  |
|                                                    |               |  |                                                       |                               |  |                                                                                       | BMI gain >1-<3 vs<br>BMI change +/-1 |                                                                  | 1.0 (0.6-1.7)  |  |
|                                                    |               |  |                                                       |                               |  |                                                                                       | BMI gain >/=3 vs<br>BMI change +/-1  |                                                                  | 1.3 (0.7-2.4)  |  |
|                                                    |               |  |                                                       |                               |  |                                                                                       |                                      |                                                                  | P trend=0.991  |  |
|                                                    |               |  |                                                       |                               |  | Contralateral<br>secondary breast<br>cancer                                           | BMI loss >/3 vs BMI<br>change +/-1   |                                                                  | 2.0 (1.1-3.6)  |  |
|                                                    |               |  |                                                       |                               |  |                                                                                       | BMI loss >1-<3 vs<br>BMI change +/-1 |                                                                  | 0.8 (0.5-1.4)  |  |
| BMI gain >1-<3 vs<br>BMI change +/-1               | 1.0 (0.7-1.6) |  |                                                       |                               |  |                                                                                       |                                      |                                                                  |                |  |
| BMI gain >/=3 vs<br>BMI change +/-1                | 0.9 (0.5-1.6) |  |                                                       |                               |  |                                                                                       |                                      |                                                                  |                |  |

|                                                                                                                                 |                                                                                        |                                                                                                                             |                                                                                                                                                                                                                                                                           |                                                                                                                                                 |                                              |                                          |                                   |                                                                                                                |
|---------------------------------------------------------------------------------------------------------------------------------|----------------------------------------------------------------------------------------|-----------------------------------------------------------------------------------------------------------------------------|---------------------------------------------------------------------------------------------------------------------------------------------------------------------------------------------------------------------------------------------------------------------------|-------------------------------------------------------------------------------------------------------------------------------------------------|----------------------------------------------|------------------------------------------|-----------------------------------|----------------------------------------------------------------------------------------------------------------|
| Kogawa T, 2018 <sup>177</sup> , MD Anderson Cancer Centre (MDACC), USA<br><br>BMI change - during treatment<br>Included, review | Retrospective Cohort of Cancer Survivors (n=4029) age range: 19-83 years, multi-ethnic | Follow Up: Median 3.95 years, 848 patients (21.1%) experienced recurrence and 694 (17.2%) had died by the time of analysis. | Nuclear grade: I=131 (3.3); grade II=1238 (30.7); grade III=2660 (66) Clinical stage: I=83 (2.1); II=2266 (56.2); III=1680 (41.7) Histological type: Ductal=3707 (9); Lobular 241=(6); Other 81 (2) Nuclear grade: I=131 (3.3); grade II=1238 (30.7); grade III=2660 (66) | >at time of diagnosis until the start of chemotherapy (baseline BMI) >from the completion of chemotherapy to the date of surgery (post-NAC BMI) | Overall survival                             | >=30 to >=25-<30 vs 18.5-<25 to 18.5-<25 | 1.14(0.73-1.77)<br>P trend=0.5743 | Adjuvant therapy, clinical stage, ethnicity, histological subtype, nuclear grade, PCR status, skin involvement |
|                                                                                                                                 |                                                                                        |                                                                                                                             |                                                                                                                                                                                                                                                                           |                                                                                                                                                 | >=25-<30 to 18.5-<25 vs 18.5-<25 to 18.5-<25 | 0.97(0.60-1.57)<br>P trend=0.9015        |                                   |                                                                                                                |
|                                                                                                                                 |                                                                                        |                                                                                                                             |                                                                                                                                                                                                                                                                           |                                                                                                                                                 | 18.5-<25 to <18.5 vs 18.5-<25 to 18.5-<25    | 1.83(0.67-5.03)<br>P trend=0.2388        |                                   |                                                                                                                |
|                                                                                                                                 |                                                                                        |                                                                                                                             |                                                                                                                                                                                                                                                                           |                                                                                                                                                 | >= 30 to >=30 vs 18.5-<25 to 18.5-<25        | 1.20(0.97-1.48)<br>P trend=0.0988        |                                   |                                                                                                                |
|                                                                                                                                 |                                                                                        |                                                                                                                             |                                                                                                                                                                                                                                                                           |                                                                                                                                                 | >=25-<30 to >=25-<30 vs 18.5-<25 to 18.5-<25 | 0.98(0.77-1.23)<br>P trend=0.8353        |                                   |                                                                                                                |
|                                                                                                                                 |                                                                                        |                                                                                                                             |                                                                                                                                                                                                                                                                           |                                                                                                                                                 | 18.5-<25 to >=25-<30 vs 18.5-<25 to 18.5-<25 | 1.22(0.79-1.87)                          |                                   |                                                                                                                |
|                                                                                                                                 |                                                                                        |                                                                                                                             |                                                                                                                                                                                                                                                                           |                                                                                                                                                 | >=25-<30 to >=30 vs 18.5-<25 to 18.5-<25     | 1.34(0.96-1.88)<br>P trend=0.087         |                                   |                                                                                                                |
|                                                                                                                                 |                                                                                        |                                                                                                                             |                                                                                                                                                                                                                                                                           |                                                                                                                                                 | 18.5-<25 to >=30 vs 18.5-<25 to 18.5-<25     | 1.66(1.09-2.54)<br>P trend=0.019         |                                   |                                                                                                                |
|                                                                                                                                 |                                                                                        |                                                                                                                             |                                                                                                                                                                                                                                                                           |                                                                                                                                                 | Recurrence free survival                     | >=30 to >=25-<30 vs 18.5-<25 to 18.5-<25 | 0.87(0.57-1.31)<br>P trend=0.5043 |                                                                                                                |
|                                                                                                                                 |                                                                                        |                                                                                                                             |                                                                                                                                                                                                                                                                           |                                                                                                                                                 | >=25-<30 to 18.5-<25 vs 18.5-<25 to 18.5-<25 | 1.01(0.66-1.52)<br>P trend=0.9822        |                                   |                                                                                                                |
|                                                                                                                                 |                                                                                        |                                                                                                                             |                                                                                                                                                                                                                                                                           |                                                                                                                                                 | 18.5-<25 to <18.5 vs 18.5-<25 to 18.5-<25    | 2.22(1.03-4.77)<br>P trend=0.0413        |                                   |                                                                                                                |
|                                                                                                                                 |                                                                                        |                                                                                                                             |                                                                                                                                                                                                                                                                           |                                                                                                                                                 | >=30 to >=30 vs 18.5-<25 to 18.5-<25         | 1.13(0.94-1.36)<br>P trend=0.1804        |                                   |                                                                                                                |
|                                                                                                                                 |                                                                                        |                                                                                                                             |                                                                                                                                                                                                                                                                           |                                                                                                                                                 | >=25-<30 to >=25-<30 vs 18.5-<25 to 18.5-<25 | 0.97(0.79-1.18)<br>P trend=0.7466        |                                   |                                                                                                                |
|                                                                                                                                 |                                                                                        |                                                                                                                             |                                                                                                                                                                                                                                                                           |                                                                                                                                                 | 18.5-<25 to >=25-<30 vs 18.5-<25 to 18.5-<25 | 1.02(0.70-1.49)<br>P trend=0.9304        |                                   |                                                                                                                |

|                                                                                                                                                                                           |                                                                                                                 |                                                                                                                       |                                                                                                                                                                                                                      |                                                                                         |                                                               |                                                                    |                               |                                                                                             |
|-------------------------------------------------------------------------------------------------------------------------------------------------------------------------------------------|-----------------------------------------------------------------------------------------------------------------|-----------------------------------------------------------------------------------------------------------------------|----------------------------------------------------------------------------------------------------------------------------------------------------------------------------------------------------------------------|-----------------------------------------------------------------------------------------|---------------------------------------------------------------|--------------------------------------------------------------------|-------------------------------|---------------------------------------------------------------------------------------------|
|                                                                                                                                                                                           |                                                                                                                 |                                                                                                                       |                                                                                                                                                                                                                      |                                                                                         |                                                               | >=25-<30 to >=30 vs<br>18.5-<25 to 18.5-<br><25<br>P trend=0.9596  |                               |                                                                                             |
|                                                                                                                                                                                           |                                                                                                                 |                                                                                                                       |                                                                                                                                                                                                                      |                                                                                         |                                                               | 18.5-<25 to >=30 vs<br>18.5-<25 to 18.5-<br><25<br>P trend=0.3108  |                               |                                                                                             |
| Liu LN, 2017 <sup>254</sup> ,<br>Taiwan<br><br>(Re-calculated RR<br>and 95% CI from<br>results in text)<br><br>Post-<br>diagnosis/BMI<br>change during<br>treatment -<br>Included, review | Prospective<br>Cohort of Cancer<br>Survivors (n=131),<br>pre- and<br>postmenopausal,<br>mean age: 46.9<br>years | Follow up:<br>median 7.6 years,<br>23 (17.6%)<br>patients<br>developed distant<br>organ metastasis<br>13 (9.9%) died. | AJCC stage 0/I 38.2%, II<br>42.7%, III 19.1%.<br>Chemotherapy yes<br>83.2%, no 16.8%.<br>Radiotherapy yes<br>55.0%, no 45.0%.<br>Hormone therapy yes<br>63.4%, no 36.6%. Type<br>of surgery BCT 43.5%,<br>MRM 56.5%. | BMI change,<br>Questionnaire At<br>diagnosis baseline<br>and 6 months<br>after surgery. | All-cause mortality                                           | Increased BMI                                                      | 1.42 (0.99-2.04)<br>(P=0.058) | Age, disease stage,<br>estrogen receptor level,<br>exercise, progesterone<br>receptor level |
|                                                                                                                                                                                           |                                                                                                                 |                                                                                                                       |                                                                                                                                                                                                                      |                                                                                         | Distant metastasis                                            |                                                                    | 1.12 (0.99-1.26)<br>(P=0.066) |                                                                                             |
| Schvartsman,<br>2017 <sup>200</sup><br>UTMDACC<br>United States<br><br>BMI change<br>during treatment<br>- Excluded                                                                       | Retro-spective<br>cohort study<br>(n= 1998)<br>Pre and post-<br>menopausal                                      | Follow-up: 7.1<br>median years,<br>Calendar year:<br>2004-2015<br>(treated)                                           | Invasive early-stage<br>breast cancer                                                                                                                                                                                | Measured BMI<br>before and after<br>chemotherapy                                        | Locoregional<br>recurrence-free<br>survival                   | >0.5 gain in BMI vs<br>±0.5 BMI                                    | 2.53 (1.18-5.45)              | Grade, stage, and<br>radiation delivery                                                     |
|                                                                                                                                                                                           |                                                                                                                 |                                                                                                                       |                                                                                                                                                                                                                      |                                                                                         | Locoregional<br>recurrence-free<br>survival<br>Postmenopausal |                                                                    | 3.77 (1.24-11.45)<br>P=0.019  | HER2 status                                                                                 |
|                                                                                                                                                                                           |                                                                                                                 |                                                                                                                       |                                                                                                                                                                                                                      |                                                                                         | Locoregional<br>recurrence-free<br>survival                   | >0.5 loss in BMI vs<br>±0.5 BMI<br>>0.5 gain in BMI vs<br>±0.5 BMI | 1.33 (0.55-3.22)              | Unadjusted                                                                                  |
|                                                                                                                                                                                           |                                                                                                                 |                                                                                                                       |                                                                                                                                                                                                                      |                                                                                         | Overall survival                                              |                                                                    | 2.59 (1.21-5.56)              |                                                                                             |
|                                                                                                                                                                                           |                                                                                                                 |                                                                                                                       |                                                                                                                                                                                                                      |                                                                                         | Progression-free<br>survival                                  | >0.5 loss in BMI vs<br>±0.5 BMI                                    | 1.29 (0.81-2.03)              |                                                                                             |
|                                                                                                                                                                                           |                                                                                                                 |                                                                                                                       |                                                                                                                                                                                                                      |                                                                                         |                                                               | >0.5 gain in BMI vs<br>±0.5 BMI                                    | 1.34 (0.87-2.08)              |                                                                                             |
|                                                                                                                                                                                           |                                                                                                                 |                                                                                                                       |                                                                                                                                                                                                                      |                                                                                         | Distant recurrence-<br>free survival                          | >0.5 loss in BMI vs<br>±0.5 BMI                                    | 1.06 (0.72-1.57)              |                                                                                             |
|                                                                                                                                                                                           |                                                                                                                 |                                                                                                                       |                                                                                                                                                                                                                      |                                                                                         |                                                               | >0.5 gain in BMI vs<br>±0.5 BMI                                    | 1.28 (0.90-1.84)              |                                                                                             |
|                                                                                                                                                                                           | >0.5 loss in BMI vs<br>±0.5 BMI                                                                                 | 1.06 (0.70-1.60)                                                                                                      |                                                                                                                                                                                                                      |                                                                                         |                                                               |                                                                    |                               |                                                                                             |
|                                                                                                                                                                                           | >0.5 gain in BMI vs<br>±0.5 BMI                                                                                 | 1.18 (0.80-1.73)                                                                                                      |                                                                                                                                                                                                                      |                                                                                         |                                                               |                                                                    |                               |                                                                                             |

|                                                         |                                                                                                                                                  |                                                |                                                                                                                                                                                                                                                                |                                                                        |                                           |                                                 |                      |                       |
|---------------------------------------------------------|--------------------------------------------------------------------------------------------------------------------------------------------------|------------------------------------------------|----------------------------------------------------------------------------------------------------------------------------------------------------------------------------------------------------------------------------------------------------------------|------------------------------------------------------------------------|-------------------------------------------|-------------------------------------------------|----------------------|-----------------------|
|                                                         |                                                                                                                                                  |                                                |                                                                                                                                                                                                                                                                |                                                                        | Contralateral breast cancer-free survival | >0.5 loss in BMI vs $\pm$ 0.5 BMI               | 0.21 (0.05-0.96)     |                       |
|                                                         |                                                                                                                                                  |                                                |                                                                                                                                                                                                                                                                |                                                                        |                                           | >0.5 gain in BMI vs $\pm$ 0.5 BMI               | 0.74 (0.29-1.86)     |                       |
| Yerushalmi R, 2017 <sup>211</sup> , CCTG trials, Canada | Randomized controlled trials: Adjuvant chemotherapy trials. MA.5 (n=710), premenopausal (100%), MA.21 (n=2083), premenopausal (68%) Total n=2793 | MA.5 10-year follow-up; MA.21 8-year follow-up | MA.5 Node+ 100%, T1/in situ 37%, HR+ 68%; Chemotherapy 100%, Anthracyclines 49%, Randomised to CEF or CMF; MA.21 Node+ 72%, High risk node- 28%, T1/in situ 35%, HR+ 61%, Chemotherapy 100%, Anthracyclines 100%, Randomised to CEF or dose dense EC/T or AC/T | Weight and height measured at baseline, 1, 3 and 5 years after accrual | Overall survival                          | BMI change 1 y post diagnosis<br>Per 1 log unit | 1.046 (0.983-1.113)  | Baseline risk factors |
| Post-diagnosis BMI change – Included, review            |                                                                                                                                                  |                                                |                                                                                                                                                                                                                                                                |                                                                        | Overall survival                          | BMI change 3 y post diagnosis<br>Per 1 log unit | 0.910 (0.854-0.969)  |                       |
|                                                         |                                                                                                                                                  |                                                |                                                                                                                                                                                                                                                                |                                                                        | Overall survival                          | BMI change 5 y post diagnosis<br>Per 1 log unit | 0.926 (0.859-0.999)  |                       |
|                                                         |                                                                                                                                                  |                                                |                                                                                                                                                                                                                                                                |                                                                        | Disease-specific survival                 | BMI change 1 y post diagnosis<br>Per 1 log unit | 1.064 (0.995-1.138)  |                       |
|                                                         |                                                                                                                                                  |                                                |                                                                                                                                                                                                                                                                |                                                                        | Disease-specific survival                 | BMI change 3 y post diagnosis<br>Per 1 log unit | 0.908 (0.848- 0.973) |                       |
|                                                         |                                                                                                                                                  |                                                |                                                                                                                                                                                                                                                                |                                                                        | Disease-specific survival                 | BMI change 5 y post diagnosis<br>Per 1 log unit | 0.896 (0.822-0.979)  |                       |
|                                                         |                                                                                                                                                  |                                                |                                                                                                                                                                                                                                                                |                                                                        | Breast cancer-free interval               | BMI change 1 y post diagnosis<br>Per 1 log unit | 1.069 (1.007-1.135)  |                       |
|                                                         |                                                                                                                                                  |                                                |                                                                                                                                                                                                                                                                |                                                                        | Breast cancer-free interval               | BMI change 3 y post diagnosis<br>Per 1 log unit | 1.050 (0.982-1.123)  |                       |
|                                                         |                                                                                                                                                  |                                                |                                                                                                                                                                                                                                                                |                                                                        | Breast cancer-free interval               | BMI change 5 y post diagnosis<br>Per 1 log unit | 1.008 (0.932-1.090)  |                       |

|                                                                                                     |                                                                                                    |  |                                                                                                                                                       |                                                                        |                             |                                                 |                      |                       |
|-----------------------------------------------------------------------------------------------------|----------------------------------------------------------------------------------------------------|--|-------------------------------------------------------------------------------------------------------------------------------------------------------|------------------------------------------------------------------------|-----------------------------|-------------------------------------------------|----------------------|-----------------------|
| Yerushalmi R, 2017 <sup>211</sup> , CCTG trials<br><br>Post-diagnosis BMI change – Included, review | Randomized controlled trials: Adjuvant endocrine therapy trial MA.12 (n=672), Premenopausal (100%) |  | MA.12, Node+ 75%, T1/in situ 43%, HR+ 75%, Chemotherapy 100%, Anthracyclines 55%<br><br>Women completed CMF, CEF, or AC received tamoxifen or placebo | Weight and height measured at baseline, 1, 3 and 5 years after accrual | Overall survival            | BMI change 1 y post diagnosis<br>Per 1 log unit | 1.083 (0.978-1.200)  | Baseline risk factors |
|                                                                                                     |                                                                                                    |  |                                                                                                                                                       |                                                                        | Overall survival            | BMI change 3 y post diagnosis<br>Per 1 log unit | 0.948 (0.858-1.048)  |                       |
|                                                                                                     |                                                                                                    |  |                                                                                                                                                       |                                                                        | Overall survival            | BMI change 5 y post diagnosis<br>Per 1 log unit | 0.939 (0.777-1.135)  |                       |
|                                                                                                     |                                                                                                    |  |                                                                                                                                                       |                                                                        | Disease-specific survival   | BMI change 1 y post diagnosis<br>Per 1 log unit | 1.085 (0.978-1.204)  |                       |
|                                                                                                     |                                                                                                    |  |                                                                                                                                                       |                                                                        | Disease-specific survival   | BMI change 3 y post diagnosis<br>Per 1 log unit | 0.966 (0.871-1.017)  |                       |
|                                                                                                     |                                                                                                    |  |                                                                                                                                                       |                                                                        | Disease-specific survival   | BMI change 5 y post diagnosis<br>Per 1 log unit | 0.961 (0.791-1.167)  |                       |
|                                                                                                     |                                                                                                    |  |                                                                                                                                                       |                                                                        | Breast cancer-free interval | BMI change 1 y post diagnosis<br>Per 1 log unit | 1.116 (1.027-1.213)  |                       |
|                                                                                                     |                                                                                                    |  |                                                                                                                                                       |                                                                        | Breast cancer-free interval | BMI change 3 y post diagnosis<br>Per 1 log unit | 1.003 (0.913-1.102)  |                       |
|                                                                                                     |                                                                                                    |  |                                                                                                                                                       |                                                                        | Breast cancer-free interval | BMI change 5 y post diagnosis<br>Per 1 log unit | 1.007 (0.899-1.128)  |                       |
| Yerushalmi R, 2017 <sup>211</sup> , CCTG trials                                                     | Randomized controlled trials Pre-, peri-, and early post-                                          |  | Triple-negative breast cancer                                                                                                                         | Weight and height measured at baseline, 1, 3                           | Overall survival            | BMI change 1 y post diagnosis<br>Per 1 log unit | 1.000 (0.887- 1.128) | Baseline risk factors |

|                                                         |                                                                                                       |  |                                                                                                                                    |                                                                        |                             |                                                 |                      |  |
|---------------------------------------------------------|-------------------------------------------------------------------------------------------------------|--|------------------------------------------------------------------------------------------------------------------------------------|------------------------------------------------------------------------|-----------------------------|-------------------------------------------------|----------------------|--|
| Post-diagnosis BMI change – Included, reiew             | menopausal trials: MA.5 Premenopausal (100%), MA.12 Premenopausal (100%), MA.21 Premenopausal (68%)   |  |                                                                                                                                    | and 5 years after accrual                                              | Overall survival            | BMI change 3 y post diagnosis<br>Per 1 log unit | 0.825 (0.709-0.960)  |  |
|                                                         |                                                                                                       |  |                                                                                                                                    |                                                                        | Overall survival            | BMI change 5 y post diagnosis<br>Per 1 log unit | 0.864 (0.704-1.059)  |  |
|                                                         |                                                                                                       |  |                                                                                                                                    |                                                                        | Disease-specific survival   | BMI change 1 y post diagnosis<br>Per 1 log unit | 1.022 (0.893- 1.171) |  |
|                                                         |                                                                                                       |  |                                                                                                                                    |                                                                        | Disease-specific survival   | BMI change 3 y post diagnosis<br>Per 1 log unit | 0.843 (0.712-0.997)  |  |
|                                                         |                                                                                                       |  |                                                                                                                                    |                                                                        | Disease-specific survival   | BMI change 5 y post diagnosis<br>Per 1 log unit | 0.814 (0.630-1.051)  |  |
|                                                         |                                                                                                       |  |                                                                                                                                    |                                                                        | Breast cancer-free interval | BMI change 1 y post diagnosis<br>Per 1 log unit | 1.101 (0.968- 1.252) |  |
|                                                         |                                                                                                       |  |                                                                                                                                    |                                                                        | Breast cancer-free interval | BMI change 3 y post diagnosis<br>Per 1 log unit | 1.110 (0.899-1.370)  |  |
|                                                         |                                                                                                       |  |                                                                                                                                    |                                                                        | Breast cancer-free interval | BMI change 5 y post diagnosis<br>Per 1 log unit | 1.279 (0.894-1.830)  |  |
| Yerushalmi R, 2017 <sup>211</sup> , CCTG trials, review | Randomized controlled trials: Endocrine therapy trials: MA.14 (n=665), MA.27 (n=7571), Postmenopausal |  | MA.14 Node+ 47%, T1/in situ 58%, HR+ 91%, Chemotherapy 31%, Anthracyclines 25%, Received tamoxifen +/-octreotide LAR; MA.27, Node+ | Weight and height measured at baseline, 1, 3 and 5 years after accrual | Overall survival            | BMI change 1 y post diagnosis<br>Per 1 log unit | 0.938 (0.887-0.991)  |  |
|                                                         |                                                                                                       |  |                                                                                                                                    |                                                                        | Overall survival            | BMI change 3 y post diagnosis<br>Per 1 log unit | 0.941 (0.871-1.017)  |  |

|                                                                                                     |                                                                                                              |  |                                                                      |  |                             |                                                 |                      |  |
|-----------------------------------------------------------------------------------------------------|--------------------------------------------------------------------------------------------------------------|--|----------------------------------------------------------------------|--|-----------------------------|-------------------------------------------------|----------------------|--|
| Post-diagnosis BMI change – Included, review                                                        |                                                                                                              |  | 28%, T1/in situ 72%, HR+ 100%<br>Chemotherapy 31% Anthracyclines 28% |  | Overall survival            | BMI change 5 y post diagnosis<br>Per 1 log unit | 0.925 (0.275-3.119)  |  |
|                                                                                                     |                                                                                                              |  |                                                                      |  | Disease-specific survival   | BMI change 1 y post diagnosis<br>Per 1 log unit | 0.965 (0.886-1.052)  |  |
|                                                                                                     |                                                                                                              |  |                                                                      |  | Disease-specific survival   | BMI change 3 y post diagnosis<br>Per 1 log unit | 0.947 (0.795-1.128)  |  |
|                                                                                                     |                                                                                                              |  |                                                                      |  | Disease-specific survival   | BMI change 5 y post diagnosis<br>Per 1 log unit | Low events           |  |
|                                                                                                     |                                                                                                              |  |                                                                      |  | Breast cancer-free interval | BMI change 1 y post diagnosis<br>Per 1 log unit | 0.991 (0.932- 1.053) |  |
|                                                                                                     |                                                                                                              |  |                                                                      |  | Breast cancer-free interval | BMI change 3 y post diagnosis<br>Per 1 log unit | 0.984 (0.904-1.071)  |  |
|                                                                                                     |                                                                                                              |  |                                                                      |  | Breast cancer-free interval | BMI change 5 y post diagnosis<br>Per 1 log unit | 1.087 (0.844-1.401)  |  |
| Yerushalmi R, 2017 <sup>211</sup> , CCTG trials<br><br>Post-diagnosis BMI change – Included, review | Randomized controlled trials: Adjuvant herceptin trials: MA.21, MA.27, HERA (n=1249), Pre and postmenopausal |  | Trastuzumab patients                                                 |  | Overall survival            | BMI change 1 y post diagnosis<br>Per 1 log unit | 0.976 (0.885-1.075)  |  |
|                                                                                                     |                                                                                                              |  |                                                                      |  | Disease-specific survival   | BMI change 1 y post diagnosis<br>Per 1 log unit | 0.966 (0.838-1.114)  |  |
|                                                                                                     |                                                                                                              |  |                                                                      |  | Breast cancer-free interval | BMI change 1 y post diagnosis<br>Per 1 log unit | 1.023 (0.978-1.069)  |  |

|                                                                                                                         |                                                           |                                                       |                                                                                                                                                                                                                                                                                                                                              |                                                                                                  |                                     |                                            |                     |                                                                                                            |
|-------------------------------------------------------------------------------------------------------------------------|-----------------------------------------------------------|-------------------------------------------------------|----------------------------------------------------------------------------------------------------------------------------------------------------------------------------------------------------------------------------------------------------------------------------------------------------------------------------------------------|--------------------------------------------------------------------------------------------------|-------------------------------------|--------------------------------------------|---------------------|------------------------------------------------------------------------------------------------------------|
| Kogawa T, 2015 <sup>84</sup> , MD Anderson Cancer Centre (MDACC), USA<br>BMI change during treatment - Included, review | Female, Retrospective Cohort of Cancer Survivors (n=1002) | Diagnosed: 2006-2012<br>Follow Up: Median 19.6 months | Locally advanced. Inflammatory breast cancer (IBC) or stage III non-IBC<br><br>Stage III/IIIA: 29.7%; IIIB: 25.8%; IIIC:44.4% cT stage: T1: 4.1%; T2: 22.5%; T3:32.8%; T4: 40.6%<br><br>All patients received standard NST consisting of anthracyclines and/or taxanes with or without concurrent trastuzumab followed by definitive surgery | BMI was measured at diagnosis before neoadjuvant chemotherapy and again at the last cycle of NST | Overall survival BMI <25            | Per 1 kg/m <sup>2</sup>                    | 1.00 (0.83-1.20)    | clinical stage, her2 status, hormonal receptor status, inflammatory breast cancer, lymphovascular invasion |
|                                                                                                                         |                                                           |                                                       |                                                                                                                                                                                                                                                                                                                                              |                                                                                                  | Overall survival 25<=BMI<30         | Per 1 kg/m <sup>2</sup>                    | 1.04 (0.88-1.23)    |                                                                                                            |
|                                                                                                                         |                                                           |                                                       |                                                                                                                                                                                                                                                                                                                                              |                                                                                                  | Overall survival BMI >30            | Per 1 kg/m <sup>2</sup>                    | 0.99 (0.91-1.08)    |                                                                                                            |
|                                                                                                                         |                                                           |                                                       |                                                                                                                                                                                                                                                                                                                                              |                                                                                                  | Recurrence free survival BMI <25    | Per 1 kg/m <sup>2</sup>                    | 0.97 (0.85-1.11)    |                                                                                                            |
|                                                                                                                         |                                                           |                                                       |                                                                                                                                                                                                                                                                                                                                              |                                                                                                  | Recurrence free survival 25<=BMI<30 | Per 1 kg/m <sup>2</sup>                    | 1.12 (0.99-1.28)    |                                                                                                            |
|                                                                                                                         |                                                           |                                                       |                                                                                                                                                                                                                                                                                                                                              |                                                                                                  | Recurrence free survival BMI >30    | Per 1 kg/m <sup>2</sup>                    | 1.02 (0.97-1.08)    |                                                                                                            |
| Fedele, 2014 <sup>160</sup> , Brindisi study, Italy<br>BMI change during treatment                                      | Retrospective cohort study (n=520). Mean age: 55 years    | Follow up: 66 median months                           | Early stage: stage 1 38%, 2 51%, 3A 11%; Luminal A 71%, Luminal B 9%; HER2 type 5%, TNBC 15%; Adjuvant                                                                                                                                                                                                                                       | Measured BMI from 1 month after surgery to 12 months after surgery                               | Breast cancer recurrence            | BMI variation (gain/loss) >5.71% vs <5.71% | 1.018 (1.002-1.034) | Stage, family history, menopausal status, age, smoking, stage, type of treatment, surgery, baseline BMI    |



|                                                                                                                                                            |                                                                                                                                  |                                                 |                                                                                                                                        |                                                                                                                                                                                                                                              |                                                 |                                                                |                                        |                                                                                                                                                                                                       |
|------------------------------------------------------------------------------------------------------------------------------------------------------------|----------------------------------------------------------------------------------------------------------------------------------|-------------------------------------------------|----------------------------------------------------------------------------------------------------------------------------------------|----------------------------------------------------------------------------------------------------------------------------------------------------------------------------------------------------------------------------------------------|-------------------------------------------------|----------------------------------------------------------------|----------------------------------------|-------------------------------------------------------------------------------------------------------------------------------------------------------------------------------------------------------|
| (surgery) -<br>Included, review                                                                                                                            |                                                                                                                                  |                                                 | chemotherapy 65%,<br>Adjuvant radiation 72%,<br>Mastectomy 29%,<br>Breast conserving 71%                                               |                                                                                                                                                                                                                                              |                                                 | BMI loss <1 vs loss<br>>1 kg/m2                                | 1.297 (0.658-2.554)<br><br>P=0.452     | Unadjusted                                                                                                                                                                                            |
|                                                                                                                                                            |                                                                                                                                  |                                                 |                                                                                                                                        |                                                                                                                                                                                                                                              |                                                 | No BMI loss vs loss<br>>1 kg/m2                                | 0.676 (0.360-1.268)<br><br>P=0.222     |                                                                                                                                                                                                       |
|                                                                                                                                                            |                                                                                                                                  |                                                 |                                                                                                                                        |                                                                                                                                                                                                                                              |                                                 | BMI gain <2 vs loss<br>>1 kg/m2                                | 1.142 (0.690-1.890)<br><br>P=0.607     |                                                                                                                                                                                                       |
|                                                                                                                                                            |                                                                                                                                  |                                                 |                                                                                                                                        |                                                                                                                                                                                                                                              |                                                 | BMI gain >2 vs loss<br>>1 kg/m2                                | 1.703 (1.039-2.790)<br><br>P=0.035     |                                                                                                                                                                                                       |
| Kroenke C,<br>2005 <sup>178</sup> , Nurses'<br>Health Study<br>(NHS), United<br>States<br><br>Pre-to-post<br>diagnosis BMI<br>change -<br>Included, review | Population-based<br>prospective<br>cohort study<br><br>(n= 5204).<br><br>Pre- and<br>postmenopausal;<br>Age range:30-55<br>years | Diagnosis: 1976-<br>2000; Follow up=<br>9 years | Invasive non metastatic<br>breast cancer<br><br>73.2% ER+<br><br>86.9% tumour size >2cm<br>Chemotherapy: 63.9%<br><br>Tamoxifen: 64.8% | Self-reported,<br>height in 1976,<br>weight in biennial<br>survey prior and<br>most recent to<br>the diagnosis and<br>≥12 months after<br>diagnosis<br><br>BMI change from<br>before to 1st BMI<br>reported ≥12<br>months after<br>diagnosis | Overall survival<br>(n=312)<br><br>Never smoker | ≥2 kg/m2 gain vs.<br>±0.5 kg/m2                                | 1.59 (1.12 - 2.27)<br><br>P trend=0.01 | Age, oral contraceptive,<br>Birth index, Age at<br>menopause, HRT use,<br>Tumour size, Nodal<br>status, chemotherapy,<br>Tamoxifen use, Protein<br>intake, menopausal<br>status, pre-diagnosis<br>BMI |
|                                                                                                                                                            |                                                                                                                                  |                                                 |                                                                                                                                        |                                                                                                                                                                                                                                              |                                                 | > 0.5 kg/m2 loss vs.<br>±0.5 kg/m2                             | 1.11 (0.78-1.56)                       |                                                                                                                                                                                                       |
|                                                                                                                                                            |                                                                                                                                  |                                                 |                                                                                                                                        |                                                                                                                                                                                                                                              |                                                 | ≥2 kg/m2 gain vs.<br>±0.5 kg/m2                                | 1.64 (1.07 - 2.51)<br><br>P trend=0.03 |                                                                                                                                                                                                       |
|                                                                                                                                                            |                                                                                                                                  |                                                 |                                                                                                                                        |                                                                                                                                                                                                                                              |                                                 | > 0.5 kg/m2 loss vs.<br>±0.5 kg/m2                             | 1.01(0.65-1.58)                        |                                                                                                                                                                                                       |
|                                                                                                                                                            |                                                                                                                                  |                                                 |                                                                                                                                        |                                                                                                                                                                                                                                              |                                                 | ≥2 kg/m2 gain vs.<br>±0.5 kg/m2                                | 1.53 (1.04 - 2.24)<br><br>P trend=0.04 |                                                                                                                                                                                                       |
|                                                                                                                                                            |                                                                                                                                  |                                                 |                                                                                                                                        |                                                                                                                                                                                                                                              |                                                 | > 0.5 kg/m2 loss vs.<br>±0.5 kg/m2                             | 0.99 (0.67-1.46)                       |                                                                                                                                                                                                       |
|                                                                                                                                                            |                                                                                                                                  |                                                 |                                                                                                                                        |                                                                                                                                                                                                                                              |                                                 | Breast cancer<br>specific mortality<br>(n=209) Never<br>smoker |                                        |                                                                                                                                                                                                       |
|                                                                                                                                                            |                                                                                                                                  |                                                 |                                                                                                                                        |                                                                                                                                                                                                                                              |                                                 | Breast cancer<br>recurrence (n=280)<br><br>Never smoker        |                                        |                                                                                                                                                                                                       |

|  |  |  |  |                                                                                     |                                                            |                                                                                 |
|--|--|--|--|-------------------------------------------------------------------------------------|------------------------------------------------------------|---------------------------------------------------------------------------------|
|  |  |  |  | Overall survival<br>(n=548)<br>Past/Current<br>smokers                              | ≥2 kg/m <sup>2</sup> gain vs.<br>±0.5 kg/m <sup>2</sup>    | 1.18 (0.91 - 1.54)<br><br>P trend=0.24<br><br>P interaction by<br>smoking=0.006 |
|  |  |  |  |                                                                                     | > 0.5 kg/m <sup>2</sup> loss vs.<br>±0.5 kg/m <sup>2</sup> | 1.23(0.96-1.57)                                                                 |
|  |  |  |  | Breast cancer-<br>specific mortality<br>(n=324)<br>Past/Current<br>smokers          | ≥2 kg/m <sup>2</sup> gain vs.<br>±0.5 kg/m <sup>2</sup>    | 1.05 (0.74 - 1.47)<br><br>P trend=0.84<br><br>P interaction by<br>smoking=0.006 |
|  |  |  |  |                                                                                     | > 0.5 kg/m <sup>2</sup> loss vs.<br>±0.5 kg/m <sup>2</sup> | 1.18 (0.85-1.63)                                                                |
|  |  |  |  | Breast cancer<br>recurrence (n=433)<br>Past/Current<br>smokers                      | ≥2 kg/m <sup>2</sup> gain vs.<br>±0.5 kg/m <sup>2</sup>    | 1.06 (0.78 - 1.43)<br><br>P trend=0.78<br><br>P interaction by<br>smoking=0.03  |
|  |  |  |  |                                                                                     | > 0.5 kg/m <sup>2</sup> loss vs.<br>±0.5 kg/m <sup>2</sup> | 1.13 (0.85-1-51)                                                                |
|  |  |  |  | Breast cancer-<br>specific mortality<br>(n=296) Baseline<br>BMI<25kg/m <sup>2</sup> | ≥2 kg/m <sup>2</sup> gain vs.<br>±0.5 kg/m <sup>2</sup>    | 1.9 (1.32 - 2.72)<br><br>P trend=0.01                                           |
|  |  |  |  |                                                                                     | > 0.5 kg/m <sup>2</sup> loss vs.<br>±0.5 kg/m <sup>2</sup> | 1.41 (0.95-2.09)                                                                |

|                                                          |                                                                                                              |                                                                    |                                                                                                                                                        |                                                                                                      |                                                                                  |                                                                 |                                                                          |                                                                                                                                                                                                                                                                                                       |
|----------------------------------------------------------|--------------------------------------------------------------------------------------------------------------|--------------------------------------------------------------------|--------------------------------------------------------------------------------------------------------------------------------------------------------|------------------------------------------------------------------------------------------------------|----------------------------------------------------------------------------------|-----------------------------------------------------------------|--------------------------------------------------------------------------|-------------------------------------------------------------------------------------------------------------------------------------------------------------------------------------------------------------------------------------------------------------------------------------------------------|
|                                                          |                                                                                                              |                                                                    |                                                                                                                                                        |                                                                                                      | Breast cancer-specific mortality (n=237) Baseline BMI $\geq$ 25kg/m <sup>2</sup> | $\geq$ 2 kg/m <sup>2</sup> gain vs. $\pm$ 0.5 kg/m <sup>2</sup> | 0.75 (0.51 - 1.11)<br>P trend=0.18<br>P interaction by baseline BMI<0.01 |                                                                                                                                                                                                                                                                                                       |
|                                                          |                                                                                                              |                                                                    |                                                                                                                                                        |                                                                                                      |                                                                                  | > 0.5 kg/m <sup>2</sup> loss vs. $\pm$ 0.5 kg/m <sup>2</sup>    | 0.81(0.57-1.15)                                                          |                                                                                                                                                                                                                                                                                                       |
| McLaughlin VH, 2014 <sup>312</sup> , WISC, United States | Prospective cohort study of cancer survivors (n= 162).<br>Pre and Post-menopausal.<br>Age range: 20-74 years | Enrolled median 1.3 years after diagnosis.<br>Follow up= 6.7 years | DCIS patients<br>Ipsilateral mastectomy 30.8%<br>Bilateral mastectomy 4.2%, BSC without radiation 9.1%<br>BCS with radiation 42.9%<br>Biopsy only 2.6% | Self-reported post-diagnosis weight in biennial questionnaires from weight one year before diagnosis | Second breast cancer (n=140)                                                     | Increase>0.13 vs. $\pm$ 0.13 kg/m <sup>2</sup> /year            | 0.88 (0.55 - 1.41)                                                       | Age at diagnosis, menopausal status, mode of detection, treatment type, postmenopausal hormone use, tamoxifen use, year of diagnosis, tumour size, tumour grade, physical activity, alcohol use, time since diagnosis, remaining lifestyle factors, and pre-diagnosis levels of each lifestyle factor |
| Pre-to-post BMI change – Excluded                        |                                                                                                              |                                                                    |                                                                                                                                                        |                                                                                                      |                                                                                  | Decrease >0.13 vs. $\pm$ 0.13 kg/m <sup>2</sup> /year           | 0.95 (0.55-1.63)<br>P trend=0.61                                         |                                                                                                                                                                                                                                                                                                       |
|                                                          |                                                                                                              |                                                                    |                                                                                                                                                        |                                                                                                      |                                                                                  | Per 1 kg/m <sup>2</sup> per year change                         | 0.98 (0.84 - 1.15)                                                       |                                                                                                                                                                                                                                                                                                       |
|                                                          |                                                                                                              |                                                                    |                                                                                                                                                        |                                                                                                      | Invasive second breast cancer (n=52)                                             | Increase>0.13 vs. $\pm$ 0.13 kg/m <sup>2</sup> /year            | 1.00 (0.44 - 2.26)                                                       |                                                                                                                                                                                                                                                                                                       |
|                                                          |                                                                                                              |                                                                    |                                                                                                                                                        |                                                                                                      |                                                                                  | Decrease >0.13 vs. $\pm$ 0.13 kg/m <sup>2</sup> /year           | 1.06 (0.43-2.65)<br>P trend=0.33                                         |                                                                                                                                                                                                                                                                                                       |
|                                                          |                                                                                                              |                                                                    |                                                                                                                                                        |                                                                                                      |                                                                                  | Per 1 kg/m <sup>2</sup> per year change                         | 0.93 (0.71 - 1.21)                                                       |                                                                                                                                                                                                                                                                                                       |

## REFERENCES

1. Ferlay JEM, Lam F, Colombet M, Mery L, Piñeros M, Znaor A, Soerjomataram I, Bray F. Global Cancer Observatory: Cancer Today. Lyon, France: International Agency for Research on Cancer, 2020.
2. Chan DSM, Abar L, Cariolou M, Nanu N, Greenwood DC, Bandera EV, McTiernan A, Norat T. World Cancer Research Fund International: Continuous Update Project-systematic literature review and meta-analysis of observational cohort studies on physical activity, sedentary behavior, adiposity, and weight change and breast cancer risk. *Cancer Causes Control* 2019; 30: 1183-200.
3. Kyrgiou M, Kalliala I, Markozannes G, Gunter MJ, Paraskevaidis E, Gabra H, Martin-Hirsch P, Tsilidis KK. Adiposity and cancer at major anatomical sites: umbrella review of the literature. *BMJ* 2017; 356: j477.
4. Collaboration NCDRF. Worldwide trends in body-mass index, underweight, overweight, and obesity from 1975 to 2016: a pooled analysis of 2416 population-based measurement studies in 128.9 million children, adolescents, and adults. *Lancet* 2017; 390: 2627-42.
5. World Cancer Research Fund/American Institute for Cancer Research. Diet, Nutrition, Physical Activity and Cancer: a Global Perspective. Continuous Update Project Expert Report, 2018.
6. Chan DSM, Vieira AR, Aune D, Bandera EV, Greenwood DC, McTiernan A, Navarro Rosenblatt D, Thune I, Vieira R, Norat T. Body mass index and survival in women with breast cancer-systematic literature review and meta-analysis of 82 follow-up studies. *Ann Oncol* 2014; 25: 1901-14.
7. Lee K, Kruper L, Dieli-Conwright CM, Mortimer JE. The Impact of Obesity on Breast Cancer Diagnosis and Treatment. *Curr Oncol Rep* 2019; 21: 41.
8. Buch K, Gunmalm V, Andersson M, Schwarz P, Brons C. Effect of chemotherapy and aromatase inhibitors in the adjuvant treatment of breast cancer on glucose and insulin metabolism-A systematic review. *Cancer Med* 2019; 8: 238-45.
9. Niraula S, Ocana A, Ennis M, Goodwin PJ. Body size and breast cancer prognosis in relation to hormone receptor and menopausal status: a meta-analysis. *Breast Cancer Res Treat* 2012; 134: 769-81.
10. Chan DS, Norat T. Obesity and breast cancer: not only a risk factor of the disease. *Curr Treat Options Oncol* 2015; 16: 22.
11. Mei L, He L, Song Y, Lv Y, Zhang L, Hao F, Xu M. Association between obesity with disease-free survival and overall survival in triple-negative breast cancer: A meta-analysis. *Medicine (Baltimore)* 2018; 97: e0719.
12. Pan H, Gray R, Braybrooke J, Davies C, Taylor C, McGale P, Peto R, Pritchard KI, Bergh J, Dowsett M, Hayes DF, Ebctcg. 20-Year Risks of Breast-Cancer Recurrence after Stopping Endocrine Therapy at 5 Years. *N Engl J Med* 2017; 377: 1836-46.
13. U.S. Cancer Statistics Data Visualizations Tool, based on 2019 submission data (1999-2017): U.S. Department of Health and Human Services, Centers for Disease Control and Prevention and National Cancer Institute, ed. June 2020. Available: [www.cdc.gov/cancer/dataviz](http://www.cdc.gov/cancer/dataviz). Accessed: May 2021.
14. Breast cancer burden in EU-27. Available: <https://ecis.jrc.ec.europa.eu>. Accessed: May 2021.
15. Tsilidis KK, Cariolou M, Becerra-Tomás N, Balducci K, Vieira R, Abar L, Aune D, Markozannes G, Nanu N, Greenwood DC, Giovannucci EL, Gunter MJ, Jackson AA, Kampman E, Lund V, Allen K, Brockton NT, Croker H, Katsikioti D, McGinley-Gieser D, Mitrou P, Wiseman M, Cross AJ, Riboli E, Clinton SK, McTiernan A, Norat T, Chan DSM. Post-diagnosis body fatness, recreational physical activity, dietary factors and breast cancer prognosis: Global Cancer Update Programme (CUP Global) summary of evidence grading. *Int J Cancer* 2022. In press.
16. Becerra-Tomás N, Balducci K, Abar L, Aune D, Cariolou M, Greenwood DC, Markozannes G, Nanu N, Vieira R, Giovannucci EL, Gunter MJ, Jackson AA, Kampman E, Lund V, Allen K, Brockton NT, Croker H, Katsikioti D, McGinley-Gieser D, Mitrou P, Wiseman M, Cross AJ, Riboli E, Clinton SK,

McTiernan A, Norat T, Tsilidis KK, Chan DSM. Post-diagnosis dietary factors, supplement use and breast cancer prognosis: Global Cancer Update Programme (CUP Global) systematic literature review and meta-analysis. *Int J Cancer* 2022. In press.

17. Cariolou M, Abar L, Aune D, Balducci K, Becerra-Tomás N, Greenwood DC, Markozannes G, Nanu N, Vieira R, Giovannucci EL, Gunter MJ, Jackson AA, Kampman E, Lund V, Allen K, Brockton NT, Croker H, Katsikioti D, McGinley-Gieser D, Mitrou P, Wiseman M, Cross AJ, Riboli E, Clinton SK, McTiernan A, Norat T, Tsilidis KK, Chan DSM. Post-diagnosis recreational physical activity and breast cancer prognosis: Global Cancer Update Programme (CUP Global) systematic literature review and meta-analysis. *Int J Cancer* 2022. In press.

18. World Cancer Research Fund/American Institute for Cancer Research Continuous Update Project (CUP), 2021. Available: <https://www.imperial.ac.uk/school-public-health/epidemiology-and-biostatistics/research/cancer-and-nutritional-epidemiology/global-cancer-update-programme/>. Accessed: July 2022.

19. Imperial College London CUP Global Team. Continuous Update Project on diet and cancer: Protocol for the data collection and systematic literature reviews on the role of diet, nutrition and physical activity on outcomes after diagnosis of breast cancer., ed. Version 3, 2019. Available: <https://www.imperial.ac.uk/school-public-health/epidemiology-and-biostatistics/research/cancer-and-nutritional-epidemiology/global-cancer-update-programme/>. Accessed: July 2022.

20. Chubak J, Boudreau DM, Wirtz HS, McKnight B, Weiss NS. Threats to validity of nonrandomized studies of postdiagnosis exposures on cancer recurrence and survival. *J Natl Cancer Inst* 2013; 105: 1456-62.

21. Savitz DA, Wellenius GA, Trikalinos TA. The Problem With Mechanistic Risk of Bias Assessments in Evidence Synthesis of Observational Studies and a Practical Alternative: Assessing the Impact of Specific Sources of Potential Bias. *Am J Epidemiol* 2019; 188: 1581-5.

22. DerSimonian R, Laird N. Meta-analysis in clinical trials. *Control Clin Trials* 1986; 7: 177-88.

23. Greenland S, Longnecker MP. Methods for trend estimation from summarized dose-response data, with applications to meta-analysis. *Am J Epidemiol* 1992; 135: 1301-9.

24. Orsini NBR, Greenland S. Generalized least squares for trend estimation of summarized dose-response data. *Stata J* 2006; 6: 40-57.

25. Aune D, Greenwood DC, Chan DS, Vieira R, Vieira AR, Navarro Rosenblatt DA, Cade JE, Burley VJ, Norat T. Body mass index, abdominal fatness and pancreatic cancer risk: a systematic review and non-linear dose-response meta-analysis of prospective studies. *Ann Oncol* 2012; 23: 843-52.

26. Bekkering GE, Harris RJ, Thomas S, Mayer AM, Beynon R, Ness AR, Harbord RM, Bain C, Smith GD, Sterne JA. How much of the data published in observational studies of the association between diet and prostate or bladder cancer is usable for meta-analysis? *Am J Epidemiol* 2008; 167: 1017-26.

27. Nechuta S, Chen WY, Cai H, Poole EM, Kwan ML, Flatt SW, Patterson RE, Pierce JP, Caan BJ, Ou Shu X. A pooled analysis of post-diagnosis lifestyle factors in association with late estrogen-receptor-positive breast cancer prognosis. *Int J Cancer* 2016; 138: 2088-97.

28. Playdon MC, Bracken MB, Sanft TB, Ligibel JA, Harrigan M, Irwin ML. Weight Gain After Breast Cancer Diagnosis and All-Cause Mortality: Systematic Review and Meta-Analysis. *J Natl Cancer Inst* 2015; 107: djv275.

29. Higgins JP, Thompson SG. Quantifying heterogeneity in a meta-analysis. *Stat Med* 2002; 21: 1539-58.

30. Stram DO. Meta-analysis of published data using a linear mixed-effects model. *Biometrics* 1996; 52: 536-44.

31. Verrill M. Chemotherapy for early-stage breast cancer: a brief history. *Br J Cancer* 2009; 101 Suppl 1: S2-5.

32. Giordano SH, Lin YL, Kuo YF, Hortobagyi GN, Goodwin JS. Decline in the use of anthracyclines for breast cancer. *J Clin Oncol* 2012; 30: 2232-9.
33. Pinto AC, Ades F, de Azambuja E, Piccart-Gebhart M. Trastuzumab for patients with HER2 positive breast cancer: delivery, duration and combination therapies. *Breast* 2013; 22 Suppl 2: S152-5.
34. Egger M, Davey Smith G, Schneider M, Minder C. Bias in meta-analysis detected by a simple, graphical test. *BMJ* 1997; 315: 629-34.
35. Viechtbauer W, Cheung MW. Outlier and influence diagnostics for meta-analysis. *Res Synth Methods* 2010; 1: 112-25.
36. Jackson D, White IR, Thompson SG. Extending DerSimonian and Laird's methodology to perform multivariate random effects meta-analyses. *Stat Med* 2010; 29: 1282-97.
37. Orsini N, Li R, Wolk A, Khudyakov P, Spiegelman D. Meta-analysis for linear and nonlinear dose-response relations: examples, an evaluation of approximations, and software. *Am J Epidemiol* 2012; 175: 66-73.
38. Royston P. A strategy for modelling the effect of a continuous covariate in medicine and epidemiology. *Stat Med* 2000; 19: 1831-47.
39. Abrahamson PE, Gammon MD, Lund MJ, Flagg EW, Porter PL, Stevens J, Swanson CA, Brinton LA, Eley JW, Coates RJ. General and abdominal obesity and survival among young women with breast cancer. *Cancer Epidemiol Biomarkers Prev* 2006; 15: 1871-7.
40. Abubakar M, Sung H, Bcr D, Guida J, Tang TS, Pfeiffer RM, Yang XR. Breast cancer risk factors, survival and recurrence, and tumor molecular subtype: analysis of 3012 women from an indigenous Asian population. *Breast Cancer Res* 2018; 20: 114.
41. Ademuyiwa FO, Groman A, O'Connor T, Ambrosone C, Watroba N, Edge SB. Impact of body mass index on clinical outcomes in triple-negative breast cancer. *Cancer* 2011; 117: 4132-40.
42. Bao PP, Cai H, Peng P, Gu K, Su Y, Shu XO, Zheng Y. Body mass index and weight change in relation to triple-negative breast cancer survival. *Cancer Causes Control* 2016; 27: 229-36.
43. Baumgärtner AK, Häusler A, Seifert-Klauss V, Schuster T, Schwarz-Boeger U, Kiechle M. Breast cancer after hormone replacement therapy--does prognosis differ in perimenopausal and postmenopausal women? *Breast* 2011; 20: 448-54.
44. Behrouzi B, Mohagheghi MA, Sadighi S. Demographic Characteristics, Survival and Prognostic Factors of Early Breast Cancer Patients with Type 2 Diabetes Mellitus: A Hospital-Based Cohort Study. *Asian Pac J Cancer Prev* 2017; 18: 2485-91.
45. Berclaz G, Li S, Price KN, Coates AS, Castiglione-Gertsch M, Rudenstam CM, Holmberg SB, Lindtner J, Erien D, Collins J, Snyder R, Thürlimann B, Fey MF, Mendiola C, Werner ID, Simoncini E, Crivellari D, Gelber RD, Goldhirsch A. Body mass index as a prognostic feature in operable breast cancer: the International Breast Cancer Study Group experience. *Ann Oncol* 2004; 15: 875-84.
46. Bergom C, Kelly T, Bedi M, Saeed H, Prior P, Rein LE, Szabo A, Wilson JF, Currey AD, White J. Association of Locoregional Control With High Body Mass Index in Women Undergoing Breast Conservation Therapy for Early-Stage Breast Cancer. *Int J Radiat Oncol Biol Phys* 2016; 96: 65-71.
47. Bernstein L, Deapen D, Cerhan JR, Schwartz SM, Liff J, McGann-Maloney E, Perlman JA, Ford L. Tamoxifen therapy for breast cancer and endometrial cancer risk. *J Natl Cancer Inst* 1999; 91: 1654-62.
48. Biganzoli E, Desmedt C, Fornili M, de Azambuja E, Cornez N, Ries F, Closon-Dejardin MT, Kerger J, Focan C, Di Leo A, Nogaret JM, Sotiriou C, Piccart M, Demicheli R. Recurrence dynamics of breast cancer according to baseline body mass index. *Eur J Cancer* 2017; 87: 10-20.
49. Borugian MJ, Sheps SB, Kim-Sing C, Olivotto IA, Van Patten C, Dunn BP, Coldman AJ, Potter JD, Gallagher RP, Hislop TG. Waist-to-hip ratio and breast cancer mortality. *Am J Epidemiol* 2003; 158: 963-8.

50. Bradshaw PT, Ibrahim JG, Stevens J, Cleveland R, Abrahamson PE, Satia JA, Teitelbaum SL, Neugut AI, Gammon MD. Postdiagnosis change in bodyweight and survival after breast cancer diagnosis. *Epidemiology* 2012; 23: 320-7.
51. Caan BJ, Kwan ML, Hartzell G, Castillo A, Slattery ML, Sternfeld B, Weltzien E. Pre-diagnosis body mass index, post-diagnosis weight change, and prognosis among women with early stage breast cancer. *Cancer Causes Control* 2008; 19: 1319-28.
52. Caan BJ, Kwan ML, Shu XO, Pierce JP, Patterson RE, Nechuta SJ, Poole EM, Kroenke CH, Weltzien EK, Flatt SW, Quesenberry CP, Jr., Holmes MD, Chen WY. Weight change and survival after breast cancer in the after breast cancer pooling project. *Cancer Epidemiol Biomarkers Prev* 2012; 21: 1260-71.
53. Caan BJ, Cespedes Feliciano EM, Prado CM, Alexeeff S, Kroenke CH, Bradshaw P, Quesenberry CP, Weltzien EK, Castillo AL, Olobatuyi TA, Chen WY. Association of Muscle and Adiposity Measured by Computed Tomography With Survival in Patients With Nonmetastatic Breast Cancer. *JAMA Oncol* 2018; 4: 798-804.
54. Cecchini RS, Swain SM, Costantino JP, Rastogi P, Jeong JH, Anderson SJ, Tang G, Geyer CE, Jr., Lembersky BC, Romond EH, Paterson AH, Wolmark N. Body Mass Index at Diagnosis and Breast Cancer Survival Prognosis in Clinical Trial Populations from NRG Oncology/NSABP B-30, B-31, B-34, and B-38. *Cancer Epidemiol Biomarkers Prev* 2016; 25: 51-9.
55. Chen X, Lu W, Zheng W, Gu K, Chen Z, Zheng Y, Shu XO. Obesity and weight change in relation to breast cancer survival. *Breast Cancer Res Treat* 2010; 122: 823-33.
56. Christiansen N, Chen L, Gilmore J, Pechar D, Szabo S. Association between African American race and outcomes in patients with nonmetastatic triple-negative breast cancer: a retrospective analysis by using results from the Georgia Cancer Specialist Database. *Clin Breast Cancer* 2012; 12: 270-5.
57. Connor AE, Baumgartner RN, Pinkston C, Baumgartner KB. Obesity and risk of breast cancer mortality in Hispanic and Non-Hispanic white women: the New Mexico Women's Health Study. *J Womens Health (Larchmt)* 2013; 22: 368-77.
58. Cook LS, White E, Schwartz SM, McKnight B, Daling JR, Weiss NS. A population-based study of contralateral breast cancer following a first primary breast cancer (Washington, United States). *Cancer Causes Control* 1996; 7: 382-90.
59. Crozier JA, Moreno-Aspitia A, Ballman KV, Dueck AC, Pockaj BA, Perez EA. Effect of body mass index on tumor characteristics and disease-free survival in patients from the HER2-positive adjuvant trastuzumab trial N9831. *Cancer* 2013; 119: 2447-54.
60. Dal Maso L, Zucchetto A, Talamini R, Serraino D, Stocco CF, Vercelli M, Falcini F, Franceschi S. Effect of obesity and other lifestyle factors on mortality in women with breast cancer. *Int J Cancer* 2008; 123: 2188-94.
61. Dawood S, Broglio K, Gonzalez-Angulo AM, Kau SW, Islam R, Hortobagyi GN, Cristofanilli M. Prognostic value of body mass index in locally advanced breast cancer. *Clin Cancer Res* 2008; 14: 1718-25.
62. Dawood S, Lei X, Litton JK, Buchholz TA, Hortobagyi GN, Gonzalez-Angulo AM. Impact of body mass index on survival outcome among women with early stage triple-negative breast cancer. *Clin Breast Cancer* 2012; 12: 364-72.
63. Dignam JJ, Wieand K, Johnson KA, Fisher B, Xu L, Mamounas EP. Obesity, tamoxifen use, and outcomes in women with estrogen receptor-positive early-stage breast cancer. *J Natl Cancer Inst* 2003; 95: 1467-76.
64. Dignam JJ, Wieand K, Johnson KA, Raich P, Anderson SJ, Somkin C, Wickerham DL. Effects of obesity and race on prognosis in lymph node-negative, estrogen receptor-negative breast cancer. *Breast Cancer Res Treat* 2006; 97: 245-54.

65. Elwood JM, Tin Tin S, Kuper-Hommel M, Lawrenson R, Campbell I. Obesity and breast cancer outcomes in chemotherapy patients in New Zealand - a population-based cohort study. *BMC Cancer* 2018; 18: 76.
66. Erbes T, Stickeler E, Rücker G, Buroh S, Asberger J, Dany N, Thornton S, Iborra S, Hirschfeld M, Gitsch G, Mayer S. BMI and Pathologic Complete Response to Neoadjuvant Chemotherapy in Breast Cancer: A Study and Meta-Analysis. *Clin Breast Cancer* 2016; 16: e119-32.
67. Ewertz M, Gillanders S, Meyer L, Zedeler K. Survival of breast cancer patients in relation to factors which affect the risk of developing breast cancer. *Int J Cancer* 1991; 49: 526-30.
68. Ewertz M, Gray KP, Regan MM, Ejlertsen B, Price KN, Thürlimann B, Bonnefoi H, Forbes JF, Paridaens RJ, Rabaglio M, Gelber RD, Colleoni M, Láng I, Smith IE, Coates AS, Goldhirsch A, Mouridsen HT. Obesity and risk of recurrence or death after adjuvant endocrine therapy with letrozole or tamoxifen in the breast international group 1-98 trial. *J Clin Oncol* 2012; 30: 3967-75.
69. Flatt SW, Thomson CA, Gold EB, Natarajan L, Rock CL, Al-Delaimy WK, Patterson RE, Saquib N, Caan BJ, Pierce JP. Low to moderate alcohol intake is not associated with increased mortality after breast cancer. *Cancer Epidemiol Biomarkers Prev* 2010; 19: 681-8.
70. Gennari A, Nanni O, Puntoni M, DeCensi A, Scarpi E, Conte P, Antonucci G, Amadori D, Bruzzi P. Body mass index and prognosis of metastatic breast cancer patients receiving first-line chemotherapy. *Cancer Epidemiol Biomarkers Prev* 2013; 22: 1862-7.
71. George SM, Bernstein L, Smith AW, Neuhouser ML, Baumgartner KB, Baumgartner RN, Ballard-Barbash R. Central adiposity after breast cancer diagnosis is related to mortality in the Health, Eating, Activity, and Lifestyle study. *Breast Cancer Res Treat* 2014; 146: 647-55.
72. Goodwin PJ, Ennis M, Pritchard KI, Trudeau ME, Koo J, Taylor SK, Hood N. Insulin- and obesity-related variables in early-stage breast cancer: correlations and time course of prognostic associations. *J Clin Oncol* 2012; 30: 164-71.
73. Habel LA, Daling JR, Newcomb PA, Self SG, Porter PL, Stanford JL, Seidel K, Weiss NS. Risk of recurrence after ductal carcinoma in situ of the breast. *Cancer Epidemiol Biomarkers Prev* 1998; 7: 689-96.
74. Hebert JR, Hurley TG, Ma Y. The effect of dietary exposures on recurrence and mortality in early stage breast cancer. *Breast Cancer Res Treat* 1998; 51: 17-28.
75. Hou G, Zhang S, Zhang X, Wang P, Hao X, Zhang J. Clinical pathological characteristics and prognostic analysis of 1,013 breast cancer patients with diabetes. *Breast Cancer Res Treat* 2013; 137: 807-16.
76. Imkampe AK, Bates T. Impact of a raised body mass index on breast cancer survival in relation to age and disease extent at diagnosis. *Breast J* 2010; 16: 156-61.
77. Izano M, Satariano WA, Tammemagi MC, Ragland D, Moore DH, Allen E, Naeim A, Sehl ME, Hiatt RA, Kerlikowske K, Sofrygin O, Braithwaite D. Long-term outcomes among African-American and white women with breast cancer: what is the impact of comorbidity? *J Geriatr Oncol* 2014; 5: 266-75.
78. Jeon YW, Kang SH, Park MH, Lim W, Cho SH, Suh YJ. Relationship between body mass index and the expression of hormone receptors or human epidermal growth factor receptor 2 with respect to breast cancer survival. *BMC Cancer* 2015; 15: 865.
79. Jiralerspong S, Kim ES, Dong W, Feng L, Hortobagyi GN, Giordano SH. Obesity, diabetes, and survival outcomes in a large cohort of early-stage breast cancer patients. *Ann Oncol* 2013; 24: 2506-14.
80. Jung SY, Sereika SM, Linkov F, Brufsky A, Weissfeld JL, Rosenzweig M. The effect of delays in treatment for breast cancer metastasis on survival. *Breast Cancer Res Treat* 2011; 130: 953-64.
81. Jung SY, Rosenzweig M, Sereika SM, Linkov F, Brufsky A, Weissfeld JL. Factors associated with mortality after breast cancer metastasis. *Cancer Causes Control* 2012; 23: 103-12.
82. Kawai M, Minami Y, Nishino Y, Fukamachi K, Ohuchi N, Kakugawa Y. Body mass index and survival after breast cancer diagnosis in Japanese women. *BMC Cancer* 2012; 12: 149.



83. Kim HJ, Kwon H, Lee JW, Kim HJ, Lee SB, Park HS, Sohn G, Lee Y, Koh BS, Yu JH, Son BH, Ahn SH. Metformin increases survival in hormone receptor-positive, HER2-positive breast cancer patients with diabetes. *Breast Cancer Res* 2015; 17: 64.
84. Kogawa T, Fouad TM, Wei C, Masuda H, Kai K, Fujii T, El-Zein R, Chavez-MacGregor M, Litton JK, Brewster A, Alvarez RH, Hortobagyi GN, Valero V, Theriault R, Ueno NT. Association of Body Mass Index Changes during Neoadjuvant Chemotherapy with Pathologic Complete Response and Clinical Outcomes in Patients with Locally Advanced Breast Cancer. *J Cancer* 2015; 6: 310-8.
85. Labidi SI, Mrad K, Mezlini A, Ouarda MA, Combes JD, Ben Abdallah M, Ben Romdhane K, Viens P, Ben Ayed F. Inflammatory breast cancer in Tunisia in the era of multimodality therapy. *Ann Oncol* 2008; 19: 473-80.
86. Lee KH, Keam B, Im SA, Kim TY, Han SW, Oh DY, Kim JH, Lee SH, Han W, Kim DW, Kim TY, Park IA, Noh DY, Heo DS, Bang YJ. Body mass index is not associated with treatment outcomes of breast cancer patients receiving neoadjuvant chemotherapy: korean data. *J Breast Cancer* 2012; 15: 427-33.
87. Li CI, Daling JR, Porter PL, Tang MT, Malone KE. Relationship between potentially modifiable lifestyle factors and risk of second primary contralateral breast cancer among women diagnosed with estrogen receptor-positive invasive breast cancer. *J Clin Oncol* 2009; 27: 5312-8.
88. Ligibel JA, Cirrincione CT, Liu M, Citron M, Ingle JN, Gradishar W, Martino S, Sikov W, Michaelson R, Mardis E, Perou CM, Ellis M, Winer E, Hudis CA, Berry D, Barry WT. Body Mass Index, PAM50 Subtype, and Outcomes in Node-Positive Breast Cancer: CALGB 9741 (Alliance). *J Natl Cancer Inst* 2015; 107.
89. Majed B, Moreau T, Senouci K, Salmon RJ, Fourquet A, Asselain B. Is obesity an independent prognosis factor in woman breast cancer? *Breast Cancer Res Treat* 2008; 111: 329-42.
90. Majed B, Moreau T, Asselain B. Overweight, obesity and breast cancer prognosis: optimal body size indicator cut-points. *Breast Cancer Res Treat* 2009; 115: 193-203.
91. Maliniak ML, Patel AV, McCullough ML, Campbell PT, Leach CR, Gapstur SM, Gaudet MM. Obesity, physical activity, and breast cancer survival among older breast cancer survivors in the Cancer Prevention Study-II Nutrition Cohort. *Breast Cancer Res Treat* 2018; 167: 133-45.
92. Marret H, Perrotin F, Bougnoux P, Descamps P, Hubert B, Lefranc T, Le Floch O, Lansac J, Body G. Low body mass index is an independent predictive factor of local recurrence after conservative treatment for breast cancer. *Breast Cancer Res Treat* 2001; 66: 17-23.
93. Maskarinec G, Pagano I, Lurie G, Bantum E, Gotay CC, Isell BF. Factors affecting survival among women with breast cancer in Hawaii. *J Womens Health (Larchmt)* 2011; 20: 231-7.
94. Mazzarella L, Disalvatore D, Bagnardi V, Rotmensz N, Galbiati D, Caputo S, Curigliano G, Pelicci PG. Obesity increases the incidence of distant metastases in oestrogen receptor-negative human epidermal growth factor receptor 2-positive breast cancer patients. *Eur J Cancer* 2013; 49: 3588-97.
95. Moore AH, Trentham-Dietz A, Burns M, Gangnon RE, Greenberg CC, Vanness DJ, Hampton J, Wu XC, Anderson RT, Lipscomb J, Kimmick GG, Cress R, Wilson JF, Sabatino SA, Fleming ST. Obesity and mortality after locoregional breast cancer diagnosis. *Breast Cancer Res Treat* 2018; 172: 647-57.
96. Mu L, Zhu N, Zhang J, Xing F, Li D, Wang X. Type 2 diabetes, insulin treatment and prognosis of breast cancer. *Diabetes Metab Res Rev* 2017; 33.
97. Nakamura K, Okada E, Ukawa S, Hirata M, Nagai A, Yamagata Z, Kiyohara Y, Muto K, Kamatani Y, Ninomiya T, Matsuda K, Kubo M, Nakamura Y, Tamakoshi A. Characteristics and prognosis of Japanese female breast cancer patients: The BioBank Japan project. *J Epidemiol* 2017; 27: S58-S64.
98. Nelson SH, Marinac CR, Patterson RE, Nechuta SJ, Flatt SW, Caan BJ, Kwan ML, Poole EM, Chen WY, Shu XO, Pierce JP. Impact of very low physical activity, BMI, and comorbidities on mortality among breast cancer survivors. *Breast Cancer Res Treat* 2016; 155: 551-7.

99. Newman SC, Lees AW, Jenkins HJ. The effect of body mass index and oestrogen receptor level on survival of breast cancer patients. *Int J Epidemiol* 1997; 26: 484-90.
100. Nichols HB, Trentham-Dietz A, Egan KM, Titus-Ernstoff L, Holmes MD, Bersch AJ, Holick CN, Hampton JM, Stampfer MJ, Willett WC, Newcomb PA. Body mass index before and after breast cancer diagnosis: associations with all-cause, breast cancer, and cardiovascular disease mortality. *Cancer Epidemiol Biomarkers Prev* 2009; 18: 1403-9.
101. Olsson A, Garne JP, Tengrup I, Zackrisson S, Manjer J. Body mass index and breast cancer survival in relation to the introduction of mammographic screening. *Eur J Surg Oncol* 2009; 35: 1261-7.
102. Pajares B, Pollán M, Martín M, Mackey JR, Lluch A, Gavila J, Vogel C, Ruiz-Borrego M, Calvo L, Pienkowski T, Rodríguez-Lescure Á, Seguí MA, Tredan O, Antón A, Ramos M, Cámara Mdel C, Rodríguez-Martín C, Carrasco E, Alba E. Obesity and survival in operable breast cancer patients treated with adjuvant anthracyclines and taxanes according to pathological subtypes: a pooled analysis. *Breast Cancer Res* 2013; 15: R105.
103. Panagopoulou P, Gogas H, Dessypris N, Maniadakis N, Fountzilas G, Petridou ET. Survival from breast cancer in relation to access to tertiary healthcare, body mass index, tumor characteristics and treatment: a Hellenic Cooperative Oncology Group (HeCOG) study. *Eur J Epidemiol* 2012; 27: 857-66.
104. Pfeiler G, Stöger H, Dubsy P, Mlineritsch B, Singer C, Balic M, Fitzal F, Moik M, Kwasny W, Selim U, Renner K, Ploner F, Steger GG, Seifert M, Hofbauer F, Sandbichler P, Samonigg H, Jakesz R, Greil R, Fesl C, Gnant M. Efficacy of tamoxifen ± aminoglutethimide in normal weight and overweight postmenopausal patients with hormone receptor-positive breast cancer: an analysis of 1509 patients of the ABCSG-06 trial. *Br J Cancer* 2013; 108: 1408-14.
105. Rier HN, Jager A, Sleijfer S, van Rosmalen J, Kock M, Levin MD. Low muscle attenuation is a prognostic factor for survival in metastatic breast cancer patients treated with first line palliative chemotherapy. *Breast* 2017; 31: 9-15.
106. Sestak I, Distler W, Forbes JF, Dowsett M, Howell A, Cuzick J. Effect of body mass index on recurrences in tamoxifen and anastrozole treated women: an exploratory analysis from the ATAC trial. *J Clin Oncol* 2010; 28: 3411-5.
107. Shariff-Marco S, Gomez SL, Sangaramoorthy M, Yang J, Koo J, Hertz A, John EM, Cheng I, Keegan TH. Impact of neighborhoods and body size on survival after breast cancer diagnosis. *Health Place* 2015; 36: 162-72.
108. Storm HH, Andersson M, Boice JD, Jr., Blettner M, Stovall M, Mouridsen HT, Dombernowsky P, Rose C, Jacobsen A, Pedersen M. Adjuvant radiotherapy and risk of contralateral breast cancer. *J Natl Cancer Inst* 1992; 84: 1245-50.
109. Sun X, Nichols HB, Robinson W, Sherman ME, Olshan AF, Troester MA. Post-diagnosis adiposity and survival among breast cancer patients: influence of breast cancer subtype. *Cancer Causes Control* 2015; 26: 1803-11.
110. Sun L, Zhu Y, Qian Q, Tang L. Body mass index and prognosis of breast cancer: An analysis by menstruation status when breast cancer diagnosis. *Medicine (Baltimore)* 2018; 97: e11220.
111. Tait S, Pacheco JM, Gao F, Bumb C, Ellis MJ, Ma CX. Body mass index, diabetes, and triple-negative breast cancer prognosis. *Breast Cancer Res Treat* 2014; 146: 189-97.
112. Tao MH, Shu XO, Ruan ZX, Gao YT, Zheng W. Association of overweight with breast cancer survival. *Am J Epidemiol* 2006; 163: 101-7.
113. Tichy JR, Deal AM, Anders CK, Reeder-Hayes K, Carey LA. Race, response to chemotherapy, and outcome within clinical breast cancer subtypes. *Breast Cancer Res Treat* 2015; 150: 667-74.

114. Veal CT, Hart V, Lakoski SG, Hampton JM, Gangnon RE, Newcomb PA, Higgins ST, Trentham-Dietz A, Sprague BL. Health-related behaviors and mortality outcomes in women diagnosed with ductal carcinoma in situ. *J Cancer Surviv* 2017; 11: 320-8.
115. Warren LE, Ligibel JA, Chen YH, Truong L, Catalano PJ, Bellon JR. Body Mass Index and Locoregional Recurrence in Women with Early-Stage Breast Cancer. *Ann Surg Oncol* 2016; 23: 3870-9.
116. Widschwendter P, Friedl TW, Schwentner L, DeGregorio N, Jaeger B, Schramm A, Bekes I, Deniz M, Lato K, Weissenbacher T, Kost B, Andergassen U, Jueckstock J, Neugebauer J, Trapp E, Fasching PA, Beckmann MW, Schneeweiss A, Schrader I, Rack B, Janni W, Scholz C. The influence of obesity on survival in early, high-risk breast cancer: results from the randomized SUCCESS A trial. *Breast Cancer Res* 2015; 17: 129.
117. Williams PT. Significantly greater reduction in breast cancer mortality from post-diagnosis running than walking. *Int J Cancer* 2014; 135: 1195-202.
118. Bandera EV, Qin B, Lin Y, Zeinomar N, Xu B, Chanumolu D, Llanos AAM, Omene CO, Pawlish KS, Ambrosone CB, Demissie K, Hong CC. Association of Body Mass Index, Central Obesity, and Body Composition With Mortality Among Black Breast Cancer Survivors. *JAMA Oncol* 2021; 7: 1-10.
119. Ko SM, Lee J, Bae SJ, Baik SJ, Ji J, Kim D, Ahn SG, Jeong J. Body mass index and absolute lymphocyte count predict disease-free survival in Korean breast cancer patients. *Br J Cancer* 2021; 125: 119-25.
120. Martel S, Lambertini M, Agbor-Tarh D, Ponde NF, Gombos A, Paterson V, Hilbers F, Korde L, Manukyants A, Dueck A, Maurer C, Piccart M, Moreno-Aspitia A, Desmedt C, Di Cosimo S, de Azambuja E. Body Mass Index and Weight Change in Patients With HER2-Positive Early Breast Cancer: Exploratory Analysis of the ALTO BIG 2-06 Trial. *J Natl Compr Canc Netw* 2021; 19: 181-9.
121. Polley MC, Dickler MN, Sinnwell J, Tenner K, de la Haba J, Loibl S, Goetz MP, Bergh J, Roberston J, Couch F, Ellis MJ, Martin M. A clinical calculator to predict disease outcomes in women with hormone receptor-positive advanced breast cancer treated with first-line endocrine therapy. *Breast Cancer Res Treat* 2021; 189: 15-23.
122. Tan X, Huang D, Zhang F, Zhao Y, Tan M, Li H, Zhang H, Wang K, Li H, Liu D, Guo R, Tang S. Evaluation of the body mass index in breast cancer prognosis in a cohort of small-stature overweight patients: multi-center study in China. *Gland Surg* 2021; 10: 23-34.
123. Desmedt C, Fornili M, Clatot F, Demicheli R, De Bortoli D, Di Leo A, Viale G, de Azambuja E, Crown J, Francis PA, Sotiriou C, Piccart M, Biganzoli E. Differential Benefit of Adjuvant Docetaxel-Based Chemotherapy in Patients With Early Breast Cancer According to Baseline Body Mass Index. *J Clin Oncol* 2020; 38: 2883-91.
124. Fadelu T, Damuse R, Lormil J, Pecan E, Greenberg L, Dubuisson C, Pierre V, Triedman SA, Shulman LN, Rebbeck TR. Body Mass Index, Chemotherapy-Related Weight Changes, and Disease-Free Survival in Haitian Women With Nonmetastatic Breast Cancer. *JCO Glob Oncol* 2020; 6: 1656-65.
125. Gondo N, Sawaki M, Hattori M, Yoshimura A, Kotani H, Adachi Y, Kataoka A, Sugino K, Mori M, Horisawa N, Terada M, Ozaki Y, Iwata H. Impact of BMI for clinical outcomes in Japanese breast cancer patients. *Jpn J Clin Oncol* 2020; 50: 230-40.
126. Oudanoh T, Nabi H, Ennour-Idrissi K, Lemieux J, Diorio C. Progesterone receptor status modifies the association between body mass index and prognosis in women diagnosed with estrogen receptor positive breast cancer. *Int J Cancer* 2020; 146: 2736-45.
127. Walsh SM, Zabor EC, Flynn J, Stempel M, Morrow M, Gemignani ML. Breast cancer in young black women. *Br J Surg* 2020; 107: 677-86.
128. Blair CK, Wiggins CL, Nibbe AM, Storlie CB, Prossnitz ER, Royce M, Lomo LC, Hill DA. Obesity and survival among a cohort of breast cancer patients is partially mediated by tumor characteristics. *NPJ Breast Cancer* 2019; 5: 33.

129. Kim JY, Kang D, Nam SJ, Kim SW, Lee JE, Yu JH, Lee SK, Im YH, Ahn JS, Guallar E, Cho J, Park YH. Clinical Features and Outcomes of Invasive Breast Cancer: Age-Specific Analysis of a Modern Hospital-Based Registry. *J Glob Oncol* 2019; 5: 1-9.
130. Vernaci G, Dieci MV, Manfrin S, Mantiero M, Falci C, Faggioni G, Mioranza E, Menichetti A, Tasca G, Griguolo G, Miglietta F, Di Liso E, Saibene T, Michieletto S, Ghiotto C, Conte P, Guarneri V. BMI is an independent prognostic factor for late outcome in patients diagnosed with early breast cancer: A landmark survival analysis. *Breast* 2019; 47: 77-84.
131. Zhang JY, Liao YH, Lin Y, Liu Q, Xie XM, Tang LY, Ren ZF. Effects of tea consumption and the interactions with lipids on breast cancer survival. *Breast Cancer Res Treat* 2019; 176: 679-86.
132. Flanagan MR, Tang MC, Baglia ML, Porter PL, Malone KE, Li CI. Relationship Between Anthropometric Factors and Risk of Second Breast Cancer Among Women With a History of Ductal Carcinoma In Situ. *JNCI Cancer Spectr* 2018; 2: pky020.
133. Hamy AS, Pierga JY, Sabaila A, Laas E, Bonsang-Kitzis H, Laurent C, Vincent-Salomon A, Cottu P, Lerebours F, Rouzier R, Lae M, Reyat F. Stromal lymphocyte infiltration after neoadjuvant chemotherapy is associated with aggressive residual disease and lower disease-free survival in HER2-positive breast cancer. *Ann Oncol* 2017; 28: 2233-40.
134. Xiao Y, Zhang S, Hou G, Zhang X, Hao X, Zhang J. Clinical pathological characteristics and prognostic analysis of diabetic women with luminal subtype breast cancer. *Tumour Biol* 2014; 35: 2035-45.
135. Hartog H, Boezen HM, de Jong MM, Schaapveld M, Wesseling J, van der Graaf WT. Prognostic value of insulin-like growth factor 1 and insulin-like growth factor binding protein 3 blood levels in breast cancer. *Breast* 2013; 22: 1155-60.
136. Barba M, Sperati F, Stranges S, Carlomagno C, Nasti G, Iaffaioli V, Caolo G, Mottotese M, Botti G, Terrenato I, Vici P, Serpico D, Giordano A, D'Aiuto G, Crispo A, Montella M, Capurso G, Delle Fave G, Fuhrman B, Botti C, De Placido S. Fasting glucose and treatment outcome in breast and colorectal cancer patients treated with targeted agents: results from a historic cohort. *Ann Oncol* 2012; 23: 1838-45.
137. Andersson TM, Crowther MJ, Czene K, Hall P, Humphreys K. Mammographic Density Reduction as a Prognostic Marker for Postmenopausal Breast Cancer: Results Using a Joint Longitudinal-Survival Modeling Approach. *Am J Epidemiol* 2017; 186: 1065-73.
138. Brooks JD, John EM, Mellemejaer L, Lynch CF, Knight JA, Malone KE, Reiner AS, Bernstein L, Liang X, Shore RE, Stovall M, Bernstein JL. Body mass index, weight change, and risk of second primary breast cancer in the WECARE study: influence of estrogen receptor status of the first breast cancer. *Cancer Med* 2016; 5: 3282-91.
139. Al Jarroudi O, Abda N, Seddik Y, Brahmi SA, Afqir S. Overweight: Is It a Prognostic Factor in Women with Triple-Negative Breast Cancer? *Asian Pac J Cancer Prev* 2017; 18: 1519-23.
140. Arce-Salinas C, Aguilar-Ponce JL, Villarreal-Garza C, Lara-Medina FU, Olvera-Caraza D, Alvarado Miranda A, Flores-Díaz D, Mohar A. Overweight and obesity as poor prognostic factors in locally advanced breast cancer patients. *Breast Cancer Res Treat* 2014; 146: 183-8.
141. Barba M, Pizzuti L, Sperduti I, Natoli C, Gamucci T, Sergi D, Di Lauro L, Moscetti L, Izzo F, Rinaldi M, Mentuccia L, Vaccaro A, Iezzi L, Grassadonia A, Michelotti A, Landucci E, Perracchio L, Pescarmona E, Di Filippo F, Giordano A, Maugeri-Saccà M, Vici P. Body Mass Index and Treatment Outcomes in Metastatic Breast Cancer Patients Treated With Eribulin. *J Cell Physiol* 2016; 231: 986-91.
142. Barnett GC, Shah M, Redman K, Easton DF, Ponder BA, Pharoah PD. Risk factors for the incidence of breast cancer: do they affect survival from the disease? *J Clin Oncol* 2008; 26: 3310-6.
143. Berrino F, Villarini A, Traina A, Bonanni B, Panico S, Mano MP, Mercandino A, Galasso R, Barbero M, Simeoni M, Bassi MC, Consolaro E, Johansson H, Zarccone M, Bruno E, Gargano G, Venturelli E, Pasanisi P. Metabolic syndrome and breast cancer prognosis. *Breast Cancer Res Treat* 2014; 147: 159-65.

144. Bonsang-Kitzis H, Chaltier L, Belin L, Savignoni A, Rouzier R, Sablin MP, Lerebours F, Bidard FC, Cottu P, Sastre-Garau X, Laé M, Pierga JY, Reyal F. Beyond Axillary Lymph Node Metastasis, BMI and Menopausal Status Are Prognostic Determinants for Triple-Negative Breast Cancer Treated by Neoadjuvant Chemotherapy. *PLoS One* 2015; 10: e0144359.
145. Buono G, Crispo A, Giuliano M, De Angelis C, Schettini F, Forestieri V, Lauria R, Pensabene M, De Laurentiis M, Augustin LSA, Amore A, D'Aiuto M, Tortoriello R, Accurso A, Cavalcanti E, Botti G, Montella M, De Placido S, Arpino G. Combined effect of obesity and diabetes on early breast cancer outcome: a prospective observational study. *Oncotarget* 2017; 8: 115709-17.
146. Caan BJ, Emond JA, Natarajan L, Castillo A, Gunderson EP, Habel L, Jones L, Newman VA, Rock CL, Slattery ML, Stefanick ML, Sternfeld B, Thomson CA, Pierce JP. Post-diagnosis weight gain and breast cancer recurrence in women with early stage breast cancer. *Breast Cancer Res Treat* 2006; 99: 47-57.
147. Camoriano JK, Loprinzi CL, Ingle JN, Therneau TM, Krook JE, Veeder MH. Weight change in women treated with adjuvant therapy or observed following mastectomy for node-positive breast cancer. *J Clin Oncol* 1990; 8: 1327-34.
148. Carmichael AR, Bendall S, Lockerbie L, Prescott RJ, Bates T. Does obesity compromise survival in women with breast cancer? *Breast* 2004; 13: 93-6.
149. Cespedes Feliciano EM, Kroenke CH, Bradshaw PT, Chen WY, Prado CM, Weltzien EK, Castillo AL, Caan BJ. Postdiagnosis Weight Change and Survival Following a Diagnosis of Early-Stage Breast Cancer. *Cancer Epidemiol Biomarkers Prev* 2017; 26: 44-50.
150. Chang S, Alderfer JR, Asmar L, Buzdar AU. Inflammatory breast cancer survival: the role of obesity and menopausal status at diagnosis. *Breast Cancer Res Treat* 2000; 64: 157-63.
151. Chen HL, Ding A, Wang ML. Impact of central obesity on prognostic outcome of triple negative breast cancer in Chinese women. *Springerplus* 2016; 5: 594.
152. Cho WK, Choi DH, Park W, Cha H, Nam SJ, Kim SW, Lee JE, Yu J, Im YH, Ahn JS, Park YH, Kim JY, Ahn S. Effect of Body Mass Index on Survival in Breast Cancer Patients According to Subtype, Metabolic Syndrome, and Treatment. *Clin Breast Cancer* 2018; 18: e1141-e7.
153. Chung IY, Lee JW, Lee JS, Park YR, Min YH, Lee Y, Yoon TI, Sohn G, Lee SB, Kim J, Kim HJ, Ko BS, Son BH, Ahn SH. Interaction between body mass index and hormone-receptor status as a prognostic factor in lymph-node-positive breast cancer. *PLoS One* 2017; 12: e0170311.
154. Clough-Gorr KM, Stuck AE, Thwin SS, Silliman RA. Older breast cancer survivors: geriatric assessment domains are associated with poor tolerance of treatment adverse effects and predict mortality over 7 years of follow-up. *J Clin Oncol* 2010; 28: 380-6.
155. Contiero P, Berrino F, Tagliabue G, Mastroianni A, Di Mauro MG, Fabiano S, Annuli M, Muti P. Fasting blood glucose and long-term prognosis of non-metastatic breast cancer: a cohort study. *Breast Cancer Res Treat* 2013; 138: 951-9.
156. Copson ER, Cutress RI, Maishman T, Eccles BK, Gerty S, Stanton L, Altman DG, Durcan L, Wong C, Simmonds PD, Jones L, Eccles DM. Obesity and the outcome of young breast cancer patients in the UK: the POSH study. *Ann Oncol* 2015; 26: 101-12.
157. Crispo A, Grimaldi M, D'Aiuto M, Rinaldo M, Capasso I, Amore A, D'Aiuto G, Giudice A, Ciliberto G, Montella M. BMI and breast cancer prognosis benefit: mammography screening reveals differences between normal weight and overweight women. *Breast* 2015; 24: 86-9.
158. Deluche E, Leobon S, Desport JC, Venat-Bouvet L, Usseglio J, Tubiana-Mathieu N. Impact of body composition on outcome in patients with early breast cancer. *Support Care Cancer* 2018; 26: 861-8.
159. Ewertz M, Jensen MB, Gunnarsdóttir K, Højris I, Jakobsen EH, Nielsen D, Stenbygaard LE, Tange UB, Cold S. Effect of obesity on prognosis after early-stage breast cancer. *J Clin Oncol* 2011; 29: 25-31.

160. Fedele P, Orlando L, Schiavone P, Quaranta A, Lapolla AM, De Pasquale M, Ardizzone A, Bria E, Sperduti I, Calvani N, Marino A, Caliolo C, Mazzoni E, Cinieri S. BMI variation increases recurrence risk in women with early-stage breast cancer. *Future Oncol* 2014; 10: 2459-68.
161. Fontanella C, Lederer B, Gade S, Vanoppen M, Blohmer JU, Costa SD, Denkert C, Eidtmann H, Gerber B, Hanusch C, Hilfrich J, Huober J, Schneeweiss A, Paepke S, Jackisch C, Mehta K, Nekljudova V, Untch M, Neven P, von Minckwitz G, Loibl S. Impact of body mass index on neoadjuvant treatment outcome: a pooled analysis of eight prospective neoadjuvant breast cancer trials. *Breast Cancer Res Treat* 2015; 150: 127-39.
162. Furlanetto J, Eiermann W, Marmé F, Reimer T, Reinisch M, Schmatloch S, Stickeler E, Thomssen C, Untch M, Denkert C, von Minckwitz G, Lederer B, Nekljudova V, Weber K, Loibl S, Möbus V. Higher rate of severe toxicities in obese patients receiving dose-dense (dd) chemotherapy according to unadjusted body surface area: results of the prospectively randomized GAIN study. *Ann Oncol* 2016; 27: 2053-9.
163. Gao YC, S.; Ren, X.B.; Zhou, L. The effect of obesity on the overall survival in node-positive breast cancer patients. *Tumor* 2010; 30: 5.
164. Gennari A, Amadori D, Scarpi E, Farolfi A, Paradiso A, Mangia A, Biglia N, Gianni L, Tienghi A, Rocca A, Maltoni R, Antonucci G, Bruzzi P, Nanni O. Impact of body mass index (BMI) on the prognosis of high-risk early breast cancer (EBC) patients treated with adjuvant chemotherapy. *Breast Cancer Res Treat* 2016; 159: 79-86.
165. Gonzalez-Angulo AM, Broglio K, Kau SW, Eralp Y, Erlichman J, Valero V, Theriault R, Booser D, Buzdar AU, Hortobagyi GN, Arun B. Women age < or = 35 years with primary breast carcinoma: disease features at presentation. *Cancer* 2005; 103: 2466-72.
166. Haakinson DJ, Leeds SG, Dueck AC, Gray RJ, Wasif N, Stucky CC, Northfelt DW, Apsey HA, Pockaj B. The impact of obesity on breast cancer: a retrospective review. *Ann Surg Oncol* 2012; 19: 3012-8.
167. Hao S, Liu Y, Yu KD, Chen S, Yang WT, Shao ZM. Overweight as a Prognostic Factor for Triple-Negative Breast Cancers in Chinese Women. *PLoS One* 2015; 10: e0129741.
168. He X, Esteva FJ, Ensor J, Hortobagyi GN, Lee MH, Yeung SC. Metformin and thiazolidinediones are associated with improved breast cancer-specific survival of diabetic women with HER2+ breast cancer. *Ann Oncol* 2012; 23: 1771-80.
169. He Y, Peng L, Huang Y, Liu C, Zheng S, Wu K. Blood cadmium levels associated with short distant metastasis-free survival time in invasive breast cancer. *Environ Sci Pollut Res Int* 2017; 24: 28055-64.
170. Herlevic VC, Mowad R, Miller JK, Darensburg NA, Li BD, Kim RH. Breast cancer outcomes in a population with high prevalence of obesity. *J Surg Res* 2015; 198: 371-6.
171. Horn PL, Thompson WD. Risk of contralateral breast cancer: associations with factors related to initial breast cancer. *Am J Epidemiol* 1988; 128: 309-23.
172. Jeon YW, Lim ST, Choi HJ, Suh YJ. Weight change and its impact on prognosis after adjuvant TAC (docetaxel-doxorubicin-cyclophosphamide) chemotherapy in Korean women with node-positive breast cancer. *Med Oncol* 2014; 31: 849.
173. Karpińska A, Safranow K, Kładny J, Sulżyc-Bielicka V. The Influence Of Obesity On Results Of AT (Doxorubicin Plus Docetaxel) Neoadjuvant Chemotherapy In Locally Advanced Breast Cancer Patients. *Pol Przegl Chir* 2015; 87: 231-7.
174. Katoh A, Watzlaf VJ, D'Amico F. An examination of obesity and breast cancer survival in post-menopausal women. *Br J Cancer* 1994; 70: 928-33.
175. Kmet LM, Cook LS, Weiss NS, Schwartz SM, White E. Risk factors for colorectal cancer following breast cancer. *Breast Cancer Res Treat* 2003; 79: 143-7.
176. Kobayashi T, Tomomatsu J, Fukada I, Shibayama T, Teruya N, Ito Y, Iwase T, Ohno S, Takahashi S. Eribulin-induced liver dysfunction as a prognostic indicator of survival of metastatic breast cancer patients: a retrospective study. *BMC Cancer* 2016; 16: 404.

177. Kogawa T, Fujii T, Fouad TM, Liu DD, Harano K, Masuda H, Iwase T, Barnett C, Park YS, Lim B, Tripathy D, Litton JK, Ueno NT. Impact of change in body mass index during neoadjuvant chemotherapy and survival among breast cancer subtypes. *Breast Cancer Res Treat* 2018; 171: 501-11.
178. Kroenke CH, Chen WY, Rosner B, Holmes MD. Weight, weight gain, and survival after breast cancer diagnosis. *J Clin Oncol* 2005; 23: 1370-8.
179. Kumar NB, Cantor A, Allen K, Cox CE. Android obesity at diagnosis and breast carcinoma survival: Evaluation of the effects of anthropometric variables at diagnosis, including body composition and body fat distribution and weight gain during life span, and survival from breast carcinoma. *Cancer* 2000; 88: 2751-7.
180. Kwak M, Kim C. Disparities by Age, Sex, Tumor Stage, Diagnosis Path, and Area-level Socioeconomic Status in Survival Time for Major Cancers: Results from the Busan Cancer Registry. *J Korean Med Sci* 2017; 32: 1974-83.
181. Ladoire S, Dalban C, Roché H, Spielmann M, Fumoleau P, Levy C, Martin AL, Ecarnot F, Bonnetain F, Ghiringhelli F. Effect of obesity on disease-free and overall survival in node-positive breast cancer patients in a large French population: a pooled analysis of two randomised trials. *Eur J Cancer* 2014; 50: 506-16.
182. Larsen SB, Kroman N, Ibfelt EH, Christensen J, Tjønneland A, Dalton SO. Influence of metabolic indicators, smoking, alcohol and socioeconomic position on mortality after breast cancer. *Acta Oncol* 2015; 54: 780-8.
183. Litton JK, Gonzalez-Angulo AM, Warneke CL, Buzdar AU, Kau SW, Bondy M, Mahabir S, Hortobagyi GN, Brewster AM. Relationship between obesity and pathologic response to neoadjuvant chemotherapy among women with operable breast cancer. *J Clin Oncol* 2008; 26: 4072-7.
184. Liu YL, Saraf A, Catanese B, Lee SM, Zhang Y, Connolly EP, Kalinsky K. Obesity and survival in the neoadjuvant breast cancer setting: role of tumor subtype in an ethnically diverse population. *Breast Cancer Res Treat* 2018; 167: 277-88.
185. Loi S, Milne RL, Friedlander ML, McCredie MR, Giles GG, Hopper JL, Phillips KA. Obesity and outcomes in premenopausal and postmenopausal breast cancer. *Cancer Epidemiol Biomarkers Prev* 2005; 14: 1686-91.
186. Majed B, Dozol A, Ribassin-Majed L, Senouci K, Asselain B. Increased risk of contralateral breast cancers among overweight and obese women: a time-dependent association. *Breast Cancer Res Treat* 2011; 126: 729-38.
187. Martel S, Poletto E, Ferreira AR, Lambertini M, Sottotetti F, Bertolini I, Montemurro F, Bernardo A, Risi E, Zanardi E, Ziliani S, Mura S, Dellepiane C, Del Mastro L, Minisini AM, Puglisi F. Impact of body mass index on the clinical outcomes of patients with HER2-positive metastatic breast cancer. *Breast* 2018; 37: 142-7.
188. Mason BH, Holdaway IM, Stewart AW, Neave LM, Kay RG. Season of tumour detection influences factors predicting survival of patients with breast cancer. *Breast Cancer Res Treat* 1990; 15: 27-37.
189. Moon HG, Han W, Noh DY. Underweight and breast cancer recurrence and death: a report from the Korean Breast Cancer Society. *J Clin Oncol* 2009; 27: 5899-905.
190. Mowad R, Chu QD, Li BD, Burton GV, Ampil FL, Kim RH. Does obesity have an effect on outcomes in triple-negative breast cancer? *J Surg Res* 2013; 184: 253-9.
191. Mutschler NS, Scholz C, Friedl TWP, Zwingers T, Fasching PA, Beckmann MW, Fehm T, Mohrmann S, Salmen J, Ziegler C, Jäger B, Widschwendter P, de Gregorio N, Schochter F, Mahner S, Harbeck N, Weissenbacher T, Jückstock J, Janni W, Rack B. Prognostic Impact of Weight Change During Adjuvant Chemotherapy in Patients With High-Risk Early Breast Cancer: Results From the ADEBAR Study. *Clin Breast Cancer* 2018; 18: 175-83.

192. Nomura AM, Marchand LL, Kolonel LN, Hankin JH. The effect of dietary fat on breast cancer survival among Caucasian and Japanese women in Hawaii. *Breast Cancer Res Treat* 1991; 18 Suppl 1: S135-41.
193. Pfeiler G, Königsberg R, Fesl C, Mlineritsch B, Stoeger H, Singer CF, Pöstlberger S, Steger GG, Seifert M, Dubsy P, Taucher S, Samonigg H, Bjelic-Radisic V, Greil R, Marth C, Gnant M. Impact of body mass index on the efficacy of endocrine therapy in premenopausal patients with breast cancer: an analysis of the prospective ABCSG-12 trial. *J Clin Oncol* 2011; 29: 2653-9.
194. Pizzuti L, Natoli C, Gamucci T, Mauri M, Sergi D, Di Lauro L, Paoletti G, Ruggeri E, Iezzi L, Sperduti I, Mentuccia L, Fabbri A, Maugeri-Saccà M, Moscetti L, Barba M, Vici P. Anthropometric, clinical and molecular determinants of treatment outcomes in postmenopausal, hormone receptor positive metastatic breast cancer patients treated with fulvestrant: Results from a real world setting. *Oncotarget* 2017; 8: 69025-37.
195. Pukkala E, Kyrrönen P, Sankila R, Holli K. Tamoxifen and toremifene treatment of breast cancer and risk of subsequent endometrial cancer: a population-based case-control study. *Int J Cancer* 2002; 100: 337-41.
196. Robinson PJ, Bell RJ, Davis SR. Obesity is associated with a poorer prognosis in women with hormone receptor positive breast cancer. *Maturitas* 2014; 79: 279-86.
197. Sahin S, Erdem GU, Karatas F, Aytekin A, Sever AR, Ozisik Y, Altundag K. The association between body mass index and immunohistochemical subtypes in breast cancer. *Breast* 2017; 32: 227-36.
198. Sánchez L, Lana A, Hidalgo A, Rodríguez JM, Del Valle Mdel O, Cueto A, Folgueras MV, Belyakova E, Comendador MA, López ML. Risk factors for second primary tumours in breast cancer survivors. *Eur J Cancer Prev* 2008; 17: 406-13.
199. Scholz C, Andergassen U, Hepp P, Schindlbeck C, Friedl TW, Harbeck N, Kiechle M, Sommer H, Hauner H, Friese K, Rack B, Janni W. Obesity as an independent risk factor for decreased survival in node-positive high-risk breast cancer. *Breast Cancer Res Treat* 2015; 151: 569-76.
200. Schvartsman G, Gutierrez-Barrera AM, Song J, Ueno NT, Peterson SK, Arun B. Association between weight gain during adjuvant chemotherapy for early-stage breast cancer and survival outcomes. *Cancer Med* 2017; 6: 2515-22.
201. Senie RT, Rosen PP, Rhodes P, Lesser ML, Kinne DW. Obesity at diagnosis of breast carcinoma influences duration of disease-free survival. *Ann Intern Med* 1992; 116: 26-32.
202. Song EJ, Lee CW, Jung SY, Kim BN, Lee KS, Lee S, Kang HS, Park IH, Lee MH, Kim YJ, Ko K, Kim S, Nam BH, Lee ES. Prognostic impact of skeletal muscle volume derived from cross-sectional computed tomography images in breast cancer. *Breast Cancer Res Treat* 2018; 172: 425-36.
203. Sparano JA, Wang M, Zhao F, Stearns V, Martino S, Ligibel JA, Perez EA, Saphner T, Wolff AC, Sledge GW, Jr., Wood WC, Fetting J, Davidson NE. Obesity at diagnosis is associated with inferior outcomes in hormone receptor-positive operable breast cancer. *Cancer* 2012; 118: 5937-46.
204. Thivat E, Théronnel S, Lapirot O, Abrial C, Gimbergues P, Gadéa E, Planchat E, Kwiatkowski F, Mouret-Reynier MA, Chollet P, Durando X. Weight change during chemotherapy changes the prognosis in non metastatic breast cancer for the worse. *BMC Cancer* 2010; 10: 648.
205. Tomiguchi M, Yamamoto Y, Yamamoto-Ibusuki M, Goto-Yamaguchi L, Fujiki Y, Fujiwara S, Sueta A, Hayashi M, Takeshita T, Inao T, Iwase H. Fibroblast growth factor receptor-1 protein expression is associated with prognosis in estrogen receptor-positive/human epidermal growth factor receptor-2-negative primary breast cancer. *Cancer Sci* 2016; 107: 491-8.
206. Turkoz FP, Solak M, Petekkaya I, Keskin O, Kertmen N, Sarici F, Arik Z, Babacan T, Ozisik Y, Altundag K. The prognostic impact of obesity on molecular subtypes of breast cancer in premenopausal women. *J buon* 2013; 18: 335-41.
207. Wisse A, Tryggvadottir H, Simonsson M, Isaksson K, Rose C, Ingvar C, Jernström H. Increasing preoperative body size in breast cancer patients between 2002 and 2016: implications for prognosis. *Cancer Causes Control* 2018; 29: 643-56.



208. Wolters R, Schwentner L, Regierer A, Wischnewsky M, Kreienberg R, Wöckel A. Endocrine therapy in obese patients with primary breast cancer: another piece of evidence in an unfinished puzzle. *Breast Cancer Res Treat* 2012; 131: 925-31.
209. Wu SY, Tan Y, Guan YS. [Clinical features and prognosis of patients with first-episode liver metastasis of different molecular subtypes of breast cancer]. *Zhonghua Gan Zang Bing Za Zhi* 2016; 24: 422-8.
210. Yan M, Wang J, Xuan Q, Dong T, He J, Zhang Q. The Relationship Between Tamoxifen-associated Nonalcoholic Fatty Liver Disease and the Prognosis of Patients With Early-stage Breast Cancer. *Clin Breast Cancer* 2017; 17: 195-203.
211. Yerushalmi R, Dong B, Chapman JW, Goss PE, Pollak MN, Burnell MJ, Levine MN, Bramwell VHC, Pritchard KI, Whelan TJ, Ingle JN, Shepherd LE, Parulekar WR, Han L, Ding K, Gelmon KA. Impact of baseline BMI and weight change in CCTG adjuvant breast cancer trials. *Ann Oncol* 2017; 28: 1560-8.
212. Zewenghiel L, Lindman H, Valachis A. Impact of body mass index on the efficacy of endocrine therapy in patients with metastatic breast cancer - A retrospective two-center cohort study. *Breast* 2018; 40: 136-40.
213. Zhang Y, Qu Q, Mao Y, Shen K. [Effect of body mass index on disease-free and overall survival in Chinese women with breast cancer]. *Zhonghua Zhong Liu Za Zhi* 2015; 37: 395-9.
214. Zhang M, Cai H, Bao P, Xu W, Qin G, Shu XO, Zheng Y. Body mass index, waist-to-hip ratio and late outcomes: a report from the Shanghai Breast Cancer Survival Study. *Sci Rep* 2017; 7: 6996.
215. Almeida NR, Brenelli FP, Dos Santos CC, Torresan RZ, Shinzato JY, Cardoso-Filho C, Duarte GM, de Azevedo NS, Zeferino LC. Comparative study of surgical and oncological outcomes in oncoplastic versus non oncoplastic breast-conserving surgery for breast cancer treatment. *JPRAS Open* 2021; 29: 184-94.
216. Anwar SL, Cahyono R, Prabowo D, Avanti WS, Choridah L, Dwianingsih EK, Harahap WA, Aryandono T. Metabolic comorbidities and the association with risks of recurrent metastatic disease in breast cancer survivors. *BMC Cancer* 2021; 21: 590.
217. Cárdenas-Cárdenas E, Tenorio-Torres A, Méndez JP, Orozco-Arguelles L, Leal-García M, Tejeda ME, Morales A, Canto P. Different body mass indexes and their relation to prognosis of early-stage breast cancer in postmenopausal Mexican-Mestizo women. *Women Health* 2021; 61: 210-7.
218. Jung AY, Hüsing A, Behrens S, Krzykalla J, Obi N, Becher H, Chang-Claude J. Postdiagnosis weight change is associated with poorer survival in breast cancer survivors: A prospective population-based patient cohort study. *Int J Cancer* 2021; 148: 18-27.
219. Ligorio F, Zambelli L, Bottiglieri A, Castagnoli L, Zattarin E, Lobefaro R, Ottini A, Vingiani A, Pupa SM, Bianchi GV, Capri G, Pruneri G, de Braud F, Vernieri C. Hormone receptor status influences the impact of body mass index and hyperglycemia on the risk of tumor relapse in early-stage HER2-positive breast cancer patients. *Ther Adv Med Oncol* 2021; 13: 17588359211006960.
220. Lin YC, Cheng HH, Chen SC, Shen WC, Huang YT. Pre-treatment high body mass index is associated with poor survival in Asian premenopausal women with localized breast cancer. *J Cancer* 2021; 12: 4488-96.
221. Modi ND, Tan JQE, Rowland A, Koczwarra B, Abuhelwa AY, Kichenadasse G, McKinnon RA, Wiese MD, Sorich MJ, Hopkins AM. The obesity paradox in early and advanced HER2 positive breast cancer: pooled analysis of clinical trial data. *NPJ Breast Cancer* 2021; 7: 30.
222. Nakatsukasa K, Niikura N, Kashiwabara K, Amemiya T, Watanabe KI, Hata H, Kikawa Y, Taniike N, Yamanaka T, Mitsunaga S, Nakagami K, Adachi M, Kondo N, Shibuya Y, Hayashi N, Naito M, Yamashita T, Umeda M, Mukai H, Ota Y. Secondary endpoints analysis in patients with estrogen receptor-positive metastatic breast cancer treated with everolimus and exemestane enrolled in Oral Care-BC. *BMC Cancer* 2021; 21: 34.

223. Orlandini LF, Pimentel FF, Andrade JM, Reis F, Mattos-Arruda L, Tiezzi DG. Obesity and high neutrophil-to-lymphocyte ratio are prognostic factors in non-metastatic breast cancer patients. *Braz J Med Biol Res* 2021; 54: e11409.
224. Saleh K, Carton M, Dieras V, Heudel PE, Brain E, D'Hondt V, Mailliez A, Patsouris A, Mouret-Reynier MA, Goncalves A, Ferrero JM, Petit T, Emile G, Uwer L, Debled M, Dalenc F, Jouannaud C, Ladoire S, Leheurteur M, Cottu P, Veron L, Savignoni A, Courtinard C, Robain M, Delaloge S, Deluche E. Impact of body mass index on overall survival in patients with metastatic breast cancer. *Breast* 2021; 55: 16-24.
225. Shang L, Hattori M, Fleming G, Jaskowiak N, Hedeker D, Olopade OI, Huo D. Impact of post-diagnosis weight change on survival outcomes in Black and White breast cancer patients. *Breast Cancer Res* 2021; 23: 18.
226. Ahn HR, Kang SY, Youn HJ, Jung SH. Hyperglycemia during Adjuvant Chemotherapy as a Prognostic Factor in Breast Cancer Patients without Diabetes. *J Breast Cancer* 2020; 23: 398-409.
227. Chen B, Lai J, Guo L, Dai D, Chen R, Wei G, Liao N. Adverse effects of being underweight on young female breast cancer patients with lymph node metastases. *J Cancer* 2020; 11: 1976-84.
228. Engkakul T, Thnogtang N, Nimmannit A, Chuthapisith S, Akewanlop C. Impact of Obesity on Outcomes of Operable Breast Cancer: A Retrospective Cohort Study. *Asian Pac J Cancer Prev* 2020; 21: 953-60.
229. Godina C, Ottander E, Tryggvadottir H, Borgquist S, Isaksson K, Jernström H. Prognostic Impact of Menopausal Hormone Therapy in Breast Cancer Differs According to Tumor Characteristics and Treatment. *Front Oncol* 2020; 10: 80.
230. Krasniqi E, Pizzuti L, Barchiesi G, Sergi D, Carpano S, Botti C, Kayal R, Sanguineti G, Marchetti P, Botticelli A, Marinelli D, Gamucci T, Natoli C, Grassadonia A, Tinari N, Tomao S, Tonini G, Santini D, Michelotti A, Mentuccia L, Vaccaro A, Magnolfi E, Gelibter A, Magri V, Cortesi E, D'Onofrio L, Cassano A, Cazzaniga M, Moschetti L, Fabbri A, Scinto AF, Corsi D, Carbognin L, Bria E, La Verde N, Garufi C, Di Stefano P, Mirabelli R, Veltri E, Paris I, Giotta F, Lorusso V, Landucci E, Ficorella C, Roselli M, Adamo V, Ricciardi G, Russo A, Valerio MR, Berardi R, Pistelli M, Cannita K, Zamagni C, Garrone O, Baldini E, Livi L, Meattini I, Del Medico P, Generali D, De Maria R, Risi E, Ciliberto G, Villa A, Sperduti I, Mazzotta M, Barba M, Giordano A, Vici P. Impact of BMI on HER2+ metastatic breast cancer patients treated with pertuzumab and/or trastuzumab emtansine. Real-world evidence. *J Cell Physiol* 2020; 235: 7900-10.
231. Liu G, Luo J. TIMP-2 gene rs4789936 polymorphism is associated with increased risk of breast cancer and poor prognosis in Southern Chinese women. *Aging (Albany NY)* 2020; 12: 19325-34.
232. Tiainen S, Masarwah A, Oikari S, Rilla K, Hämäläinen K, Sudah M, Sutela A, Vanninen R, Ikonen J, Tammi R, Tammi M, Auvinen P. Tumor microenvironment and breast cancer survival: combined effects of breast fat, M2 macrophages and hyaluronan create a dismal prognosis. *Breast Cancer Res Treat* 2020; 179: 565-75.
233. Al-Saleh K, Abd El-Aziz N, Ali A, Abo Zeed W, Salah T, Elsamany S, Rasmy A, El Farargy O, Husain S, Al-Rikabi A, Alsaeed E, Aldiab A, Abd El-Warith A. A Multicenter Study of the Impact of Body Mass Index (BMI) on the incidence of Pathologic Complete Response (pCR) Among Saudi Patients with locally advanced Breast cancer (LABC) post Neoadjuvant Chemotherapy (NAC). *Gulf J Oncolog* 2019; 1: 33-42.
234. Ayoub NM, Yaghan RJ, Abdo NM, Matalaka, II, Akhu-Zaheya LM, Al-Mohtaseb AH. Impact of Obesity on Clinicopathologic Characteristics and Disease Prognosis in Pre- and Postmenopausal Breast Cancer Patients: A Retrospective Institutional Study. *J Obes* 2019; 2019: 3820759.
235. Cacho-Díaz B, Spínola-Maróño H, Reynoso N, González-Aguilar A, Mohar-Betancourt A. Role of Overweight, Obesity, and Comorbidities in the Prognosis of Patients With Breast Cancer With Brain Metastases. *Clin Breast Cancer* 2019; 19: e394-e8.

236. Fang Q, Huang J, Gan L, Shen K, Chen X, Wu B. Weight Gain during Neoadjuvant Chemotherapy is Associated with Worse Outcome among the Patients with Operable Breast Cancer. *J Breast Cancer* 2019; 22: 399-411.
237. Fasching PA, Gass P, Häberle L, Volz B, Hein A, Hack CC, Lux MP, Jud SM, Hartmann A, Beckmann MW, Slamon DJ, Erber R. Prognostic effect of Ki-67 in common clinical subgroups of patients with HER2-negative, hormone receptor-positive early breast cancer. *Breast Cancer Res Treat* 2019; 175: 617-25.
238. Franzoi MA, Eiger D, Ameye L, Ponde N, Caparica R, De Angelis C, Brandão M, Desmedt C, Di Cosimo S, Kotecki N, Lambertini M, Awada A, Piccart M, Azambuja E. Clinical Implications of Body Mass Index in Metastatic Breast Cancer Patients Treated With Abemaciclib and Endocrine Therapy. *J Natl Cancer Inst* 2021; 113: 462-70.
239. Kim JY, Lee DW, Lee KH, Min A, Ryu HS, Lee HB, Moon HG, Kim TY, Han SW, Oh DY, Han W, Park IA, Noh DY, Im SA, Kim S. Prognostic role of body mass index is different according to menopausal status and tumor subtype in breast cancer patients. *Breast Cancer Res Treat* 2019; 176: 453-60.
240. Tryggvadottir H, Ygland Rödström M, Markkula A, Kenéz X, Isaksson K, Borgquist S, Jernström H. The impact of body size changes on recurrence risk depends on age and estrogen receptor status in primary breast cancer. *Cancer Causes Control* 2019; 30: 1157-70.
241. Wang K, Wu YT, Zhang X, Chen L, Zhu WM, Zhang AJ, Zheng K, Yin XD, Li F, Kong LQ, Ma BL, Li H, Liu JP, Jiang J, Li ZY, Shi Y, Ren GS, Li HY. Clinicopathologic and Prognostic Significance of Body Mass Index (BMI) among Breast Cancer Patients in Western China: A Retrospective Multicenter Cohort Based on Western China Clinical Cooperation Group (WCCCG). *Biomed Res Int* 2019; 2019: 3692093.
242. Wang X, Hui TL, Wang MQ, Liu H, Li RY, Song ZC. Body Mass Index at Diagnosis as a Prognostic Factor for Early-Stage Invasive Breast Cancer after Surgical Resection. *Oncol Res Treat* 2019; 42: 195-201.
243. Bouvard B, Chatelais J, Soulié P, Hoppé E, Saulnier P, Capitain O, Mege M, Mesgouez-Nebout N, Jadaud E, Abadie-Lacourtoisie S, Campone M, Legrand E. Osteoporosis treatment and 10 years' oestrogen receptor+ breast cancer outcome in postmenopausal women treated with aromatase inhibitors. *Eur J Cancer* 2018; 101: 87-94.
244. Hwang KT, Chu AJ, Kim J, Lee JY, Chang JH, Oh S, Kim YA, Jung J, Oh B. Prognostic Influence of Preoperative Mammographic Breast Density in Operable Invasive Female Breast Cancer. *Sci Rep* 2018; 8: 16075.
245. Strand F, Humphreys K, Holm J, Eriksson M, Törnberg S, Hall P, Azavedo E, Czene K. Long-term prognostic implications of risk factors associated with tumor size: a case study of women regularly attending screening. *Breast Cancer Res* 2018; 20: 31.
246. Pizzuti L, Marchetti P, Natoli C, Gamucci T, Santini D, Scinto AF, Iezzi L, Mentuccia L, D'Onofrio L, Botticelli A, Moscetti L, Sperati F, Botti C, Ferranti F, Buglioni S, Sanguineti G, Di Filippo S, di Lauro L, Sergi D, Catenaro T, Tomao S, Giordano A, Maugeri-Saccà M, Barba M, Vici P. Fasting glucose and body mass index as predictors of activity in breast cancer patients treated with everolimus-exemestane: The EverExt study. *Sci Rep* 2017; 7: 10597.
247. Ohara M, Akimoto E, Noma M, Matsuura K, Doi M, Kagawa N, Itamoto T. Prognostic impact of progesterone receptor status combined with body mass index in breast cancer patients treated with adjuvant aromatase inhibitor. *Oncol Lett* 2015; 10: 3286-92.
248. Zeichner SB, Koru-Sengul T, Shah N, Liu Q, Markward NJ, Montero AJ, Glück S, Silva O, Ahn ER. Improved clinical outcomes associated with vitamin D supplementation during adjuvant chemotherapy in patients with HER2+ nonmetastatic breast cancer. *Clin Breast Cancer* 2015; 15: e1-11.

249. Kaviani A, Neishaboury M, Mohammadzadeh N, Ansari-Damavandi M, Jamei K. Effects of obesity on presentation of breast cancer, lymph node metastasis and patient survival: a retrospective review. *Asian Pac J Cancer Prev* 2013; 14: 2225-9.
250. Xing P, Li JG, Jin F, Zhao TT, Liu Q, Dong HT, Wei XL. Prognostic significance of body mass index in breast cancer patients with hormone receptor-positive tumours after curative surgery. *Clin Invest Med* 2013; 36: E297-305.
251. Zheng Z, Cao H, Qu S, Liu Y, Piao Y, Xie X. Clinical features and prognosis of obese breast cancer patients: a retrospective study\*. *Chinese-German J Clin Oncol* 2013; 12: 5.
252. Greenlee H, Unger JM, LeBlanc M, Ramsey S, Hershman DL. Association between Body Mass Index and Cancer Survival in a Pooled Analysis of 22 Clinical Trials. *Cancer Epidemiol Biomarkers Prev* 2017; 26: 21-9.
253. Rosner GL, Hargis JB, Hollis DR, Budman DR, Weiss RB, Henderson IC, Schilsky RL. Relationship between toxicity and obesity in women receiving adjuvant chemotherapy for breast cancer: results from cancer and leukemia group B study 8541. *J Clin Oncol* 1996; 14: 3000-8.
254. Liu LN, Lin YC, Miaskowski C, Chen SC, Chen ML. Association between changes in body fat and disease progression after breast cancer surgery is moderated by menopausal status. *BMC Cancer* 2017; 17: 863.
255. Buono G, Crispo A, Giuliano M, De Angelis C, Schettini F, Forestieri V, Lauria R, De Laurentiis M, De Placido P, Rea CG, Pacilio C, Esposito E, Grimaldi M, Nocerino F, Porciello G, Giudice A, Amore A, Minopoli A, Botti G, De Placido S, Trivedi MV, Arpino G. Metabolic syndrome and early stage breast cancer outcome: results from a prospective observational study. *Breast Cancer Res Treat* 2020; 182: 401-9.
256. Goodwin PJ, Segal RJ, Vallis M, Ligibel JA, Pond GR, Robidoux A, Findlay B, Gralow JR, Mukherjee SD, Levine M, Pritchard KI. The LISA randomized trial of a weight loss intervention in postmenopausal breast cancer. *NPJ Breast Cancer* 2020; 6: 6.
257. Raghavendra A, Sinha AK, Valle-Goffin J, Shen Y, Tripathy D, Barcenas CH. Determinants of Weight Gain During Adjuvant Endocrine Therapy and Association of Such Weight Gain With Recurrence in Long-term Breast Cancer Survivors. *Clin Breast Cancer* 2018; 18: e7-e13.
258. Abe R, Kumagai N, Kimura M, Hirosaki A, Nakamura T. Biological characteristics of breast cancer in obesity. *Tohoku J Exp Med* 1976; 120: 351-9.
259. Al Saeed EF, Ghabbban AJ, Tunio MA. Impact of BMI on Locoregional Control among Saudi Patients with Breast Cancer after Breast Conserving Surgery and Modified Radical Mastectomy. *Gulf J Oncolog* 2015; 1: 7-14.
260. Albain KS, Green S, LeBlanc M, Rivkin S, O'Sullivan J, Osborne CK. Proportional hazards and recursive partitioning and amalgamation analyses of the Southwest Oncology Group node-positive adjuvant CMFVP breast cancer data base: a pilot study. *Breast Cancer Res Treat* 1992; 22: 273-84.
261. Allin KH, Nordestgaard BG, Flyger H, Bojesen SE. Elevated pre-treatment levels of plasma C-reactive protein are associated with poor prognosis after breast cancer: a cohort study. *Breast Cancer Res* 2011; 13: R55.
262. Anderson SJ, Wapnir I, Dignam JJ, Fisher B, Mamounas EP, Jeong JH, Geyer CE, Jr., Wickerham DL, Costantino JP, Wolmark N. Prognosis after ipsilateral breast tumor recurrence and locoregional recurrences in patients treated by breast-conserving therapy in five National Surgical Adjuvant Breast and Bowel Project protocols of node-negative breast cancer. *J Clin Oncol* 2009; 27: 2466-73.
263. Artac M, Bozcuk H, Afacan B, Ozdogan M, Samur M. The impact of waist-to-hip ratio on clinical outcomes in metastatic breast cancer patients treated with aromatase inhibitors. *Breast* 2008; 17: 418-22.

264. Artac M, Bozcuk H, Kiyici A, Eren OO, Boruban MC, Ozdogan M. Serum leptin level and waist-to-hip ratio (WHR) predict the overall survival of metastatic breast cancer (MBC) patients treated with aromatase inhibitors (AIs). *Breast Cancer* 2013; 20: 174-80.
265. Bastarrachea J, Hortobagyi GN, Smith TL, Kau SW, Buzdar AU. Obesity as an adverse prognostic factor for patients receiving adjuvant chemotherapy for breast cancer. *Ann Intern Med* 1994; 120: 18-25.
266. Bayraktar S, Hernandez-Aya LF, Lei X, Meric-Bernstam F, Litton JK, Hsu L, Hortobagyi GN, Gonzalez-Angulo AM. Effect of metformin on survival outcomes in diabetic patients with triple receptor-negative breast cancer. *Cancer* 2012; 118: 1202-11.
267. Bergmann A, Bourrus NS, de Carvalho CM, Dias Rde A, Fabro EA, Sales NS, de Aguiar SS. Arm symptoms and overall survival in Brazilian patients with advanced breast cancer. *Asian Pac J Cancer Prev* 2011; 12: 2939-42.
268. Biglia N, Peano E, Sgandurra P, Moggio G, Pecchio S, Maggiorotto F, Sismondi P. Body mass index (BMI) and breast cancer: impact on tumor histopathologic features, cancer subtypes and recurrence rate in pre and postmenopausal women. *Gynecol Endocrinol* 2013; 29: 263-7.
269. Björner S, Rosendahl AH, Simonsson M, Markkula A, Jirström K, Borgquist S, Rose C, Ingvar C, Jernström H. Body Mass Index Influences the Prognostic Impact of Combined Nuclear Insulin Receptor and Estrogen Receptor Expression in Primary Breast Cancer. *Front Endocrinol (Lausanne)* 2017; 8: 332.
270. Boivin L, Diguisto C, Chas M, Bédouet L, Etienne C, Arbion F, Body G, Ouldamer L. [Outcomes of patients with breast cancer in function of their body mass index]. *Gynecol Obstet Fertil Senol* 2017; 45: 215-23.
271. Borgquist S, Hjertberg M, Henningson M, Ingvar C, Rose C, Jernström H. Given breast cancer, is fat better than thin? Impact of the estrogen receptor beta gene polymorphisms. *Breast Cancer Res Treat* 2013; 137: 849-62.
272. Boyd NF, Campbell JE, Germanson T, Thomson DB, Sutherland DJ, Meakin JW. Body weight and prognosis in breast cancer. *J Natl Cancer Inst* 1981; 67: 785-9.
273. Bradshaw PT, Ibrahim JG, Gammon MD. A Bayesian proportional hazards regression model with non-ignorably missing time-varying covariates. *Stat Med* 2010; 29: 3017-29.
274. Brewster AM, Do KA, Thompson PA, Hahn KM, Sahin AA, Cao Y, Stewart MM, Murray JL, Hortobagyi GN, Bondy ML. Relationship between epidemiologic risk factors and breast cancer recurrence. *J Clin Oncol* 2007; 25: 4438-44.
275. Brooks JD, John EM, Mellemejkær L, Reiner AS, Malone KE, Lynch CF, Figueiredo JC, Haile RW, Shore RE, Bernstein JL, Bernstein L. Body mass index and risk of second primary breast cancer: the WECARE Study. *Breast Cancer Res Treat* 2012; 131: 571-80.
276. Burkheimer E, Starks L, Khan M, Oostendorp L, Melnik MK, Chung MH, Wright GP. The impact of obesity on treatment choices and outcomes in operable breast cancer. *Am J Surg* 2019; 217: 474-7.
277. Cakar B, Muslu U, Erdogan AP, Ozisik M, Ozisik H, Tunakan Dalgic C, Durusoy R, Karaca B, Sezgin C, Karabulut B, Uslu R. The Role of Body Mass Index in Triple Negative Breast Cancer. *Oncol Res Treat* 2015; 38: 518-22.
278. Cespedes Feliciano EM, Kwan ML, Kushi LH, Chen WY, Weltzien EK, Castillo AL, Sweeney C, Bernard PS, Caan BJ. Body mass index, PAM50 subtype, recurrence, and survival among patients with nonmetastatic breast cancer. *Cancer* 2017; 123: 2535-42.
279. Chapman JA, Pritchard KI, Goss PE, Ingle JN, Muss HB, Dent SF, Vandenberg TA, Findlay B, Gelmon KA, Wilson CF, Shepherd LE, Pollak MN. Competing risks of death in younger and older postmenopausal breast cancer patients. *World J Clin Oncol* 2014; 5: 1088-96.
280. Chen CH, Lo YF, Tsai HP, Shen SC, Chao TC, Chen MF, Chen SC. Low body mass index is an independent risk factor of locoregional recurrence in women with breast cancer undergoing breast conserving therapy. *Chang Gung Med J* 2009; 32: 553-62.

281. Coates RJ, Clark WS, Eley JW, Greenberg RS, Huguley CM, Jr., Brown RL. Race, nutritional status, and survival from breast cancer. *J Natl Cancer Inst* 1990; 82: 1684-92.
282. Crujeiras AB, Cueva J, Vieito M, Curiel T, López-López R, Pollán M, Casanueva FF. Association of breast cancer and obesity in a homogeneous population from Spain. *J Endocrinol Invest* 2012; 35: 681-5.
283. de Azambuja E, McCaskill-Stevens W, Francis P, Quinaux E, Crown JP, Vicente M, Giuliani R, Nordenskjöld B, Gutiérrez J, Andersson M, Vila MM, Jakesz R, Demol J, Dewar J, Santoro A, Lluch A, Olsen S, Gelber RD, Di Leo A, Piccart-Gebhart M. The effect of body mass index on overall and disease-free survival in node-positive breast cancer patients treated with docetaxel and doxorubicin-containing adjuvant chemotherapy: the experience of the BIG 02-98 trial. *Breast Cancer Res Treat* 2010; 119: 145-53.
284. Demirkan B, Alacacioglu A, Yilmaz U. Relation of body mass index (BMI) to disease free (DFS) and distant disease free survivals (DDFS) among Turkish women with operable breast carcinoma. *Jpn J Clin Oncol* 2007; 37: 256-65.
285. Donegan WLJ, S.; Koehler, M.R. The prognostic implications of obesity for the surgical cure of breast cancer. *Breast Dis Breast* 1978: 4.
286. Eralp Y, Smith TL, Altundağ K, Kau SW, Litton J, Valero V, Buzdar A, Hortobagyi GN, Arun B. Clinical features associated with a favorable outcome following neoadjuvant chemotherapy in women with localized breast cancer aged 35 years or younger. *J Cancer Res Clin Oncol* 2009; 135: 141-8.
287. Ewertz M, Machado SG, Boice JD, Jr., Jensen OM. Endometrial cancer following treatment for breast cancer: a case-control study in Denmark. *Br J Cancer* 1984; 50: 687-92.
288. Ewertz M. Breast cancer in Denmark. Incidence, risk factors, and characteristics of survival. *Acta Oncol* 1993; 32: 595-615.
289. Fan Y, Ding X, Xu B, Ma F, Yuan P, Wang J, Zhang P, Li Q, Luo Y. Prognostic Significance of Single Progesterone Receptor Positivity: A Comparison Study of Estrogen Receptor Negative/Progesterone Receptor Positive/Her2 Negative Primary Breast Cancer With Triple Negative Breast Cancer. *Medicine (Baltimore)* 2015; 94: e2066.
290. Farr A, Stolz M, Baumann L, Bago-Horvath Z, Oppolzer E, Pfeiler G, Seifert M, Singer CF. The effect of obesity on pathological complete response and survival in breast cancer patients receiving uncapped doses of neoadjuvant anthracycline-taxane-based chemotherapy. *Breast* 2017; 33: 153-8.
291. Gnant M, Pfeiler G, Stöger H, Mlineritsch B, Fitzal F, Balic M, Kwasny W, Seifert M, Stierer M, Dubsy P, Greil R, Steger G, Samonigg H, Fesl C, Jakesz R. The predictive impact of body mass index on the efficacy of extended adjuvant endocrine treatment with anastrozole in postmenopausal patients with breast cancer: an analysis of the randomised ABCSG-6a trial. *Br J Cancer* 2013; 109: 589-96.
292. Goodwin PJ, Ennis M, Pritchard KI, Trudeau ME, Koo J, Madarnas Y, Hartwick W, Hoffman B, Hood N. Fasting insulin and outcome in early-stage breast cancer: results of a prospective cohort study. *J Clin Oncol* 2002; 20: 42-51.
293. Gordon NH, Crowe JP, Brumberg DJ, Berger NA. Socioeconomic factors and race in breast cancer recurrence and survival. *Am J Epidemiol* 1992; 135: 609-18.
294. Guo Q, Burgess S, Turman C, Bolla MK, Wang Q, Lush M, Abraham J, Aittomäki K, Andrulis IL, Apicella C, Arndt V, Barrdahl M, Benitez J, Berg CD, Blomqvist C, Bojesen SE, Bonanni B, Brand JS, Brenner H, Broeks A, Burwinkel B, Caldas C, Campa D, Canzian F, Chang-Claude J, Chanock SJ, Chin SF, Couch FJ, Cox A, Cross SS, Cybulski C, Czene K, Darabi H, Devilee P, Diver WR, Dunning AM, Earl HM, Eccles DM, Ekici AB, Eriksson M, Evans DG, Fasching PA, Figueroa J, Flesch-Janys D, Flyger H, Gapstur SM, Gaudet MM, Giles GG, Glendon G, Grip M, Gronwald J, Haeberle L, Haiman CA, Hall P, Hamann U, Hankinson S, Hartikainen JM, Hein A, Hiller L, Hogervorst FB, Holleccek B, Hooning MJ, Hoover RN, Humphreys K, Hunter DJ, Hüsing A, Jakubowska A, Jukkola-Vuorinen A, Kaaks R,

Kabisch M, Kataja V, Knight JA, Koppert LB, Kosma VM, Kristensen VN, Lambrechts D, Le Marchand L, Li J, Lindblom A, Lindström S, Lissowska J, Lubinski J, Machiela MJ, Mannermaa A, Manoukian S, Margolin S, Marme F, Martens JWM, McLean C, Menéndez P, Milne RL, Marie Mulligan A, Muranen TA, Nevanlinna H, Neven P, Nielsen SF, Nordestgaard BG, Olson JE, Perez JIA, Peterlongo P, Phillips KA, Poole CJ, Pylkäs K, Radice P, Rahman N, Rüdiger T, Rudolph A, Sawyer EJ, Schumacher F, Seibold P, Seynaeve C, Shah M, Smeets A, Southey MC, Tollenaar R, Tomlinson I, Tsimiklis H, Ulmer HU, Vachon C, van den Ouweland AMW, Van't Veer LJ, Wildiers H, Willett W, Winqvist R, Zamora MP, Chenevix-Trench G, Dörk T, Easton DF, García-Closas M, Kraft P, Hopper JL, Zheng W, Schmidt MK, Pharoah PDP. Body mass index and breast cancer survival: a Mendelian randomization analysis. *Int J Epidemiol* 2017; 46: 1814-22.

295. Hebert JR, Augustine A, Barone J, Kabat GC, Kinne DW, Wynder EL. Weight, height and body mass index in the prognosis of breast cancer: early results of a prospective study. *Int J Cancer* 1988; 42: 315-8.

296. Hyun SH, Ahn HK, Lee JH, Choi JY, Kim BT, Park YH, Im YH, Lee JE, Nam SJ, Lee KH. Body Mass Index with Tumor 18F-FDG Uptake Improves Risk Stratification in Patients with Breast Cancer. *PLoS One* 2016; 11: e0165814.

297. Iwase T, Nakamura R, Yamamoto N, Yoshi A, Itami M, Miyazaki M. The effect of molecular subtype and body mass index on neo-adjuvant chemotherapy in breast cancer patients. *Breast* 2014; 23: 264-72.

298. Jeon SJ, Lee JI, Jeon MJ, Lee M. Prognostic Effects of Adjuvant Chemotherapy-Induced Amenorrhea and Subsequent Resumption of Menstruation for Premenopausal Breast Cancer Patients. *Medicine (Baltimore)* 2016; 95: e3301.

299. Kamby C, Ejlersen B, Andersen J, Birkler NE, Rytter L, Zedeler K, Rose C. Body size and menopausal status in relation to the pattern of spread in recurrent breast cancer. *Acta Oncol* 1989; 28: 795-9.

300. Karatas F, Erdem GU, Sahin S, AYTEKIN A, YUCE D, SEVER AR, BABACAN T, ATEŞ O, OZISIK Y, ALTUNDAG K. Obesity is an independent prognostic factor of decreased pathological complete response to neoadjuvant chemotherapy in breast cancer patients. *Breast* 2017; 32: 237-44.

301. Kawai M, Tomotaki A, Miyata H, Iwamoto T, Niikura N, Anan K, Hayashi N, Aogi K, Ishida T, Masuoka H, Iijima K, Masuda S, Tsugawa K, Kinoshita T, Nakamura S, Tokuda Y. Body mass index and survival after diagnosis of invasive breast cancer: a study based on the Japanese National Clinical Database-Breast Cancer Registry. *Cancer Med* 2016; 5: 1328-40.

302. Kimura M. Obesity as prognostic factors in breast cancer. *Diabetes Res Clin Pract* 1990; 10 Suppl 1: S247-51.

303. Kneubil MC, Brollo J, Botteri E, Curigliano G, Rotmensz N, Goldhirsch A, Lohsiriwat V, Manconi A, Martella S, Santillo B, Petit JY, Rietjens M. Breast cancer subtype approximations and loco-regional recurrence after immediate breast reconstruction. *Eur J Surg Oncol* 2013; 39: 260-5.

304. Kwan ML, John EM, Caan BJ, Lee VS, Bernstein L, Cheng I, Gomez SL, Henderson BE, Keegan TH, Kurian AW, Lu Y, Monroe KR, Roh JM, Shariff-Marco S, Spoto R, Vigen C, Wu AH. Obesity and mortality after breast cancer by race/ethnicity: The California Breast Cancer Survivorship Consortium. *Am J Epidemiol* 2014; 179: 95-111.

305. Kyogoku S, Hirohata T, Takeshita S, Nomura Y, Shigematsu T, Horie A. Survival of breast-cancer patients and body size indicators. *Int J Cancer* 1990; 46: 824-31.

306. Lara-Medina F, Pérez-Sánchez V, Saavedra-Pérez D, Blake-Cerda M, Arce C, Motola-Kuba D, Villarreal-Garza C, González-Angulo AM, Bargalló E, Aguilar JL, Mohar A, Arrieta Ó. Triple-negative breast cancer in Hispanic patients: high prevalence, poor prognosis, and association with menopausal status, body mass index, and parity. *Cancer* 2011; 117: 3658-69.

307. Lee Y, Lee SA, Choi JY, Song M, Sung H, Jeon S, Park SK, Yoo KY, Noh DY, Ahn SH, Kang D. Prognosis of breast cancer is associated with one-carbon metabolism related nutrients among Korean women. *Nutr J* 2012; 11: 59.

308. Lethaby AE, Mason BH, Harvey VJ, Holdaway IM. Survival of women with node negative breast cancer in the Auckland region. *N Z Med J* 1996; 109: 330-3.
309. Levine EG, Raczynski JM, Carpenter JT. Weight gain with breast cancer adjuvant treatment. *Cancer* 1991; 67: 1954-9.
310. Loehberg CR, Almstedt K, Jud SM, Haeberle L, Fasching PA, Hack CC, Lux MP, Thiel FC, Schrauder MG, Brunner M, Bayer CM, Hein A, Heusinger K, Heimrich J, Bani MR, Renner SP, Hartmann A, Beckmann MW, Wachter DL. Prognostic relevance of Ki-67 in the primary tumor for survival after a diagnosis of distant metastasis. *Breast Cancer Res Treat* 2013; 138: 899-908.
311. Markkula A, Bromée A, Henningson M, Hietala M, Ringberg A, Ingvar C, Rose C, Jernström H. Given breast cancer, does breast size matter? Data from a prospective breast cancer cohort. *Cancer Causes Control* 2012; 23: 1307-16.
312. McLaughlin VH, Trentham-Dietz A, Hampton JM, Newcomb PA, Sprague BL. Lifestyle factors and the risk of a second breast cancer after ductal carcinoma in situ. *Cancer Epidemiol Biomarkers Prev* 2014; 23: 450-60.
313. McNee RK, Mason BH, Neave LM, Kay RG. Influence of height, weight, and obesity on breast cancer incidence and recurrence in Auckland, New Zealand. *Breast Cancer Res Treat* 1987; 9: 145-50.
314. Menon KV, Hodge A, Houghton J, Bates T. Body mass index, height and cumulative menstrual cycles at the time of diagnosis are not risk factors for poor outcome in breast cancer. *Breast* 1999; 8: 328-33.
315. Mohle-Boetani JC, Grosser S, Whittemore AS, Malec M, Kampert JB, Paffenbarger RS, Jr. Body size, reproductive factors, and breast cancer survival. *Prev Med* 1988; 17: 634-42.
316. Morrison VA, McCall L, Muss HB, Jatoi A, Cohen HJ, Cirrincione CT, Ligibel JA, Lafky JM, Hurria A. The impact of actual body weight-based chemotherapy dosing and body size on adverse events and outcome in older patients with breast cancer: Results from Cancer and Leukemia Group B (CALGB) trial 49907 (Alliance A151436). *J Geriatr Oncol* 2018; 9: 228-34.
317. Mousa U, Onur H, Utkan G. Is obesity always a risk factor for all breast cancer patients? c-erbB2 expression is significantly lower in obese patients with early stage breast cancer. *Clin Transl Oncol* 2012; 14: 923-30.
318. Papatestas AE, Miller SR, Pertsemlidis D, Fagerstrom R, Lesnick G, Aufses AH. Association between prognosis and hormone receptors in women with breast cancer. *Cancer Detect Prev* 1986; 9: 303-10.
319. Perez CA, Zumsteg ZS, Gupta G, Morrow M, Arnold B, Patil SM, Traina TA, Robson ME, Wen YH, McCormick B, Powell SN, Ho AY. Black race as a prognostic factor in triple-negative breast cancer patients treated with breast-conserving therapy: a large, single-institution retrospective analysis. *Breast Cancer Res Treat* 2013; 139: 497-506.
320. Pierce JP, Stefanick ML, Flatt SW, Natarajan L, Sternfeld B, Madlensky L, Al-Delaimy WK, Thomson CA, Kealey S, Hajek R, Parker BA, Newman VA, Caan B, Rock CL. Greater survival after breast cancer in physically active women with high vegetable-fruit intake regardless of obesity. *J Clin Oncol* 2007; 25: 2345-51.
321. Pizzuti L, Sergi D, Sperduti I, Lauro LD, Mazzotta M, Botti C, Izzo F, Marchetti L, Tomao S, Marchetti P, Natoli C, Grassadonia A, Gamucci T, Mentuccia L, Magnolfi E, Vaccaro A, Cassano A, Rossi E, Botticelli A, Sini V, Sarobba MG, Fabbri MA, Moschetti L, Astone A, Michelotti A, De Angelis C, Bertolini I, Angelini F, Ciliberto G, Maugeri-Saccà M, Giordano A, Barba M, Vici P. Body mass index in HER2-negative metastatic breast cancer treated with first-line paclitaxel and bevacizumab. *Cancer Biol Ther* 2018; 19: 328-34.
322. Prado CM, Baracos VE, McCargar LJ, Reiman T, Mourtzakis M, Tonkin K, Mackey JR, Koski S, Pituskin E, Sawyer MB. Sarcopenia as a determinant of chemotherapy toxicity and time to tumor progression in metastatic breast cancer patients receiving capecitabine treatment. *Clin Cancer Res* 2009; 15: 2920-6.



323. Pritchard KI, Shepherd LE, Chapman JA, Norris BD, Cantin J, Goss PE, Dent SF, Walde D, Vandenberg TA, Findlay B, O'Reilly SE, Wilson CF, Han L, Piura E, Whelan TJ, Pollak MN. Randomized trial of tamoxifen versus combined tamoxifen and octreotide LAR Therapy in the adjuvant treatment of early-stage breast cancer in postmenopausal women: NCIC CTG MA.14. *J Clin Oncol* 2011; 29: 3869-76.
324. Rier HN, Jager A, Sleijfer S, van Rosmalen J, Kock M, Levin MD. Changes in body composition and muscle attenuation during taxane-based chemotherapy in patients with metastatic breast cancer. *Breast Cancer Res Treat* 2018; 168: 95-105.
325. Robinson B, Currie M, Phillips E, Dachs G, Strother M, Morrin H, Davey V, Frampton C. Body mass index (BMI): association with clinicopathological factors and outcome of women with newly diagnosed breast cancer in New Zealand. *N Z Med J* 2017; 130: 46-56.
326. Rohan TE, Hiller JE, McMichael AJ. Dietary factors and survival from breast cancer. *Nutr Cancer* 1993; 20: 167-77.
327. Rossi L, Stevens D, Pierga JY, Lerebours F, Reyat F, Robain M, Asselain B, Rouzier R. Impact of Adjuvant Chemotherapy on Breast Cancer Survival: A Real-World Population. *PLoS One* 2015; 10: e0132853.
328. Sarkissyan M, Wu Y, Vadgama JV. Obesity is associated with breast cancer in African-American women but not Hispanic women in South Los Angeles. *Cancer* 2011; 117: 3814-23.
329. Saxe GA, Rock CL, Wicha MS, Schottenfeld D. Diet and risk for breast cancer recurrence and survival. *Breast Cancer Res Treat* 1999; 53: 241-53.
330. Schuetz F, Diel IJ, Poeschel M, von Holst T, Solomayer EF, Lange S, Sinn P, Bastert G, Sohn C. Reduced incidence of distant metastases and lower mortality in 1072 patients with breast cancer with a history of hormone replacement therapy. *Am J Obstet Gynecol* 2007; 196: 342.e1-9.
331. Sendur MA, Aksoy S, Zengin N, Altundag K. Efficacy of adjuvant aromatase inhibitor in hormone receptor-positive postmenopausal breast cancer patients according to the body mass index. *Br J Cancer* 2012; 107: 1815-9.
332. Sendur MA, Aksoy S, Ozdemir NY, Zengin N, Yazici O, Sever AR, Altundag K. Effect of body mass index on the efficacy of adjuvant tamoxifen in premenopausal patients with hormone receptor-positive breast cancer. *J buon* 2016; 21: 27-34.
333. Sestak I, Dowsett M, Ferree S, Baehner FL, Cuzick J. Retrospective analysis of molecular scores for the prediction of distant recurrence according to baseline risk factors. *Breast Cancer Res Treat* 2016; 159: 71-8.
334. Shachar SS, Deal AM, Weinberg M, Nyrop KA, Williams GR, Nishijima TF, Benbow JM, Muss HB. Skeletal Muscle Measures as Predictors of Toxicity, Hospitalization, and Survival in Patients with Metastatic Breast Cancer Receiving Taxane-Based Chemotherapy. *Clin Cancer Res* 2017; 23: 658-65.
335. Shu XO, Zheng Y, Cai H, Gu K, Chen Z, Zheng W, Lu W. Soy food intake and breast cancer survival. *Jama* 2009; 302: 2437-43.
336. Singh AK, Pandey A, Tewari M, Pratyush DD, Singh HK, Pandey HP, Shukla HS. Obesity augmented breast cancer risk: a potential risk factor for Indian women. *J Surg Oncol* 2011; 103: 217-22.
337. Slaoui M, Mouh FZ, Ghanname I, Razine R, El Mzibri M, Amrani M. Outcome of Breast Cancer in Moroccan Young Women Correlated to Clinic-Pathological Features, Risk Factors and Treatment: A Comparative Study of 716 Cases in a Single Institution. *PLoS One* 2016; 11: e0164841.
338. Sohrabi A, Sandoz J, Spratt JS, Polk HC, Jr. Recurrence of breast cancer. Obesity, tumor size, and axillary lymph node metastases. *Jama* 1980; 244: 264-5.
339. Sparano JA, Wang M, Zhao F, Stearns V, Martino S, Ligibel JA, Perez EA, Saphner T, Wolff AC, Sledge GW, Jr., Wood WC, Davidson NE. Race and hormone receptor-positive breast cancer outcomes in a randomized chemotherapy trial. *J Natl Cancer Inst* 2012; 104: 406-14.

340. Su Y, Cai H, Zheng Y, Qiu Q, Lu W, Shu XO, Cai Q. Associations of the Transforming Growth Factor  $\beta$ /Smad Pathway, Body Mass Index, and Physical Activity With Breast Cancer Outcomes: Results From the Shanghai Breast Cancer Study. *Am J Epidemiol* 2016; 184: 501-9.
341. Suissa S, Pollak M, Spitzer WO, Margolese R. Body size and breast cancer prognosis: a statistical explanation of the discrepancies. *Cancer Res* 1989; 49: 3113-6.
342. Tammemagi CM, Nerenz D, Neslund-Dudas C, Feldkamp C, Nathanson D. Comorbidity and survival disparities among black and white patients with breast cancer. *Jama* 2005; 294: 1765-72.
343. Tamura N, Tsuda H, Yoshida M, Hojo T, Akashi-Tanaka S, Kinoshita T, Sugihara K. Clinicopathological predictive factors for ipsilateral and contralateral events following initial surgery to treat ductal carcinoma in situ. *Breast Cancer* 2016; 23: 510-8.
344. Tartter PI, Papatestas AE, Ioannovich J, Mulvihill MN, Lesnick G, Aufses AH, Jr. Cholesterol and obesity as prognostic factors in breast cancer. *Cancer* 1981; 47: 2222-7.
345. Taylor SG, Knuiman MW, Sleeper LA, Olson JE, Tormey DC, Gilchrist KW, Falkson G, Rosenthal SN, Carbone PP, Cummings FJ. Six-year results of the Eastern Cooperative Oncology Group trial of observation versus CMFP versus CMFPT in postmenopausal patients with node-positive breast cancer. *J Clin Oncol* 1989; 7: 879-89.
346. Venturelli E, Orenti A, Fabricio ASC, Garrone G, Agresti R, Paolini B, Bonini C, Gion M, Berrino F, Desmedt C, Coradini D, Biganzoli E. Observational study on the prognostic value of testosterone and adiposity in postmenopausal estrogen receptor positive breast cancer patients. *BMC Cancer* 2018; 18: 651.
347. Villaseñor A, Ballard-Barbash R, Baumgartner K, Baumgartner R, Bernstein L, McTiernan A, Neuhaus ML. Prevalence and prognostic effect of sarcopenia in breast cancer survivors: the HEAL Study. *J Cancer Surviv* 2012; 6: 398-406.
348. Vitolins MZ, Kimmick GG, Case LD. BMI influences prognosis following surgery and adjuvant chemotherapy for lymph node positive breast cancer. *Breast J* 2008; 14: 357-65.
349. von Drygalski A, Tran TB, Messer K, Pu M, Corringham S, Nelson C, Ball ED. Obesity is an independent predictor of poor survival in metastatic breast cancer: retrospective analysis of a patient cohort whose treatment included high-dose chemotherapy and autologous stem cell support. *Int J Breast Cancer* 2011; 2011: 523276.
350. Wu X, Ye Y, Barcenas CH, Chow WH, Meng QH, Chavez-MacGregor M, Hildebrandt MA, Zhao H, Gu X, Deng Y, Wagar E, Esteva FJ, Tripathy D, Hortobagyi GN. Personalized Prognostic Prediction Models for Breast Cancer Recurrence and Survival Incorporating Multidimensional Data. *J Natl Cancer Inst* 2017; 109.
351. Zekri J, Farag K, Allithy A. Obesity and outcome of post-menopausal women receiving adjuvant letrozole for breast cancer. *Ecancermedscience* 2018; 12: 821.
352. Zhou P, Jiang YZ, Hu X, Sun W, Liu YR, Liu F, Luo RC, Shao ZM. Clinicopathological characteristics of patients with HER2-positive breast cancer and the efficacy of trastuzumab in the People's Republic of China. *Onco Targets Ther* 2016; 9: 2287-95.
353. Ballinger TJ, Jiang G, Kassem N, Radovich M, Schneider BP. Impact of Body Mass Index on Presence of ctDNA and Disease Recurrence after Neoadjuvant Chemotherapy for Triple-Negative Breast Cancer: Analysis from BRE12-158. *Clin Cancer Res* 2021; 27: 1195-9.
354. Behrouzi B, Zokaasadi M, Mohagheghi MA, Emami AH, Sadighi S. The Effect of Metformin on Survival Outcomes of Non-Metastatic Breast Cancer Patients with Type 2 Diabetes. *Asian Pac J Cancer Prev* 2021; 22: 611-6.
355. Iwase T, Parikh A, Dibaj SS, Shen Y, Shrimanker TV, Chainitkun S, Kida K, Sapon ME, Sahin O, James A, Medrano AYD, Klopp AH, Ueno NT. The Prognostic Impact of Body Composition for Locally Advanced Breast Cancer Patients Who Received Neoadjuvant Chemotherapy. *Cancers (Basel)* 2021; 13.

356. Jeon YW, Park HS, Ko Y, Sung YS, Shim BY, Suh YJ, Kim HA. Intermuscular fat density as a novel prognostic factor in breast cancer patients treated with adjuvant chemotherapy. *Breast Cancer Res Treat* 2021; 189: 759-68.
357. Kennard K, Buckley ME, Sizer LM, Larson S, Carter WB, Frazier TG, Carp NZ. Metabolic Syndrome: does this influence breast cancer outcomes in the triple-negative population? *Breast Cancer Res Treat* 2021; 186: 53-63.
358. Kim SW, Chun M, Jung YS, Oh YT, Noh OK, Cho O. Impact of Body Mass Index on Local Recurrence according to Intrinsic Subtype Approximation in Korean Women with Early Stage Invasive Breast Cancer Receiving Contemporary Treatments. *J Cancer* 2021; 12: 4648-54.
359. Kreklau A, Nel I, Kasimir-Bauer S, Kimmig R, Frackenpohl AC, Aktas B. An Observational Study on Breast Cancer Survival and Lifestyle Related Risk Factors. *In Vivo* 2021; 35: 1007-15.
360. Liu YS, Wu PE, Chou WC, Vikram R, Chen WT, Yang SL, Bolla MK, Wang Q, Dennis J, Chan TL, Choi JY, Hou MF, Ito H, Kang D, Kim SW, Kwong A, Matsuo K, Park SK, Shu XO, Zheng W, Dunning AM, Easton DF, Shen CY. Body mass index and type 2 diabetes and breast cancer survival: a Mendelian randomization study. *Am J Cancer Res* 2021; 11: 3921-34.
361. Tong Y, Gao W, Wu J, Zhu S, Huang O, He J, Zhu L, Chen W, Li Y, Shen K, Chen X. Comprehensive Association Analysis of 21-Gene Recurrence Score and Obesity in Chinese Breast Cancer Patients. *Front Oncol* 2021; 11: 619840.
362. Bayraktar S, Zhou JZ, Bassett R, Gutierrez Barrera AM, Layman RM, Valero V, Arun B. Clinical outcome and toxicity from taxanes in breast cancer patients with BRCA1 and BRCA2 pathogenic germline mutations. *Breast J* 2020; 26: 1572-82.
363. Caleffi M, Crivelatti I, Burchardt NA, Ribeiro RA, Acevedo Y, Job LG, Nonnemacher N, Rosa DD. Breast cancer survival in Brazil: How much health care access impact on cancer outcomes? *Breast* 2020; 54: 155-9.
364. Cantini L, Pistelli M, Merloni F, Fontana A, Bertolini I, De Angelis C, Bastianelli L, Della Mora A, Santinelli A, Savini A, Maccaroni E, Diodati L, Falcone A, Berardi R. Body Mass Index and Hormone Receptor Status Influence Recurrence Risk in HER2-Positive Early Breast Cancer Patients. *Clin Breast Cancer* 2020; 20: e89-e98.
365. Corona SP, Giudici F, Jerusalem G, Ciruelos E, Strina C, Sirico M, Bernocchi O, Milani M, Dester M, Ziglioli N, Barbieri G, Cervoni V, Montemurro F, Generali D. Impact of BMI on the outcome of metastatic breast cancer patients treated with everolimus: a retrospective exploratory analysis of the BALLETT study. *Oncotarget* 2020; 11: 2172-81.
366. da Silva JL, de Paula BHR, Small IA, Thuler LCS, de Melo AC. Sociodemographic, Clinical, and Pathological Factors Influencing Outcomes in Locally Advanced Triple Negative Breast Cancer: A Brazilian Cohort. *Breast Cancer (Auckl)* 2020; 14: 1178223420962488.
367. Di Cosimo S, Porcu L, Agbor-Tarh D, Cinieri S, Franzoi MA, De Santis MC, Saura C, Huober J, Fumagalli D, Izquierdo M, Piccart M, Daidone MG, de Azambuja E. Effect of body mass index on response to neo-adjuvant therapy in HER2-positive breast cancer: an exploratory analysis of the NeoALTTO trial. *Breast Cancer Res* 2020; 22: 115.
368. Huh J, Park B, Lee H, An YS, Jung Y, Kim JY, Kang DK, Kim KW, Kim TH. Prognostic Value of Skeletal Muscle Depletion Measured on Computed Tomography for Overall Survival in Patients with Non-Metastatic Breast Cancer. *J Breast Cancer* 2020; 23: 80-92.
369. Patel V, James M, Frampton C, Robinson B, Davey V, Timmings L. Body Mass Index and Outcomes in Breast Cancer Treated With Breast Conservation. *Int J Radiat Oncol Biol Phys* 2020; 106: 369-76.
370. Schmidt G, Schneider C, Gerlinger C, Endrikat J, Gabriel L, Ströder R, Müller C, Juhasz-Böss I, Solomayer EF. Impact of body mass index, smoking habit, alcohol consumption, physical activity and parity on disease course of women with triple-negative breast cancer. *Arch Gynecol Obstet* 2020; 301: 603-9.

371. Tong Y, Wu J, Huang O, He J, Zhu L, Chen W, Li Y, Chen X, Shen K. IGF-1 Interacted With Obesity in Prognosis Prediction in HER2-Positive Breast Cancer Patients. *Front Oncol* 2020; 10: 550.
372. Abdel-Rahman O. Outcomes of metastatic breast cancer patients in relationship to disease-free interval following primary treatment of localized disease; a pooled analysis of two clinical trials. *Breast J* 2019; 25: 823-8.
373. Kus T, Cinkir HY, Aktas G, Abali H. Hepatosteatosi may predict late recurrence of breast cancer: A single-center observational study. *Curr Probl Cancer* 2019; 43: 100461.
374. Lee JW, Kim SY, Lee HJ, Han SW, Lee JE, Lee SM. Prognostic Significance of Abdominal-to-Gluteofemoral Adipose Tissue Distribution in Patients with Breast Cancer. *J Clin Med* 2019; 8.
375. Omarini C, Palumbo P, Pecchi A, Draisci S, Balduzzi S, Nasso C, Barbolini M, Isca C, Bocconi A, Moscetti L, Galetti S, Tazzioli G, Torricelli P, Cascinu S, Piacentini F. Predictive Role Of Body Composition Parameters In Operable Breast Cancer Patients Treated With Neoadjuvant Chemotherapy. *Cancer Manag Res* 2019; 11: 9563-9.
376. Yao D, Wang Z, Cai H, Li Y, Li B. Relationship between red cell distribution width and prognosis in patients with breast cancer after operation: a retrospective cohort study. *Biosci Rep* 2019; 39.
377. Zhang M, Zhang X, Liu J, Su W, Li J, Zhang S, Zhang J. Body mass index and diabetes are important prognostic signatures for bilateral breast cancer prognosis. *J Cell Biochem* 2019.
378. Desmedt C, Demicheli R, Fornili M, Bachir I, Duca M, Viglietti G, Berlière M, Piccart M, Sotiriou C, Sosnowski M, Forget P, Biganzoli E. Potential Benefit of Intra-operative Administration of Ketorolac on Breast Cancer Recurrence According to the Patient's Body Mass Index. *J Natl Cancer Inst* 2018; 110: 1115-22.
379. Espelund U, Renehan AG, Cold S, Oxvig C, Lancashire L, Su Z, Flyvbjerg A, Frystyk J. Prognostic relevance and performance characteristics of serum IGFBP-2 and PAPP-A in women with breast cancer: a long-term Danish cohort study. *Cancer Med* 2018; 7: 2391-404.
380. Wu R, Liu T, Yang P, Liu X, Liu F, Wang Y, Xiong H, Yu S, Huang X, Zhuang L. Association of 15-hydroxyprostaglandin dehydrogenase and poor prognosis of obese breast cancer patients. *Oncotarget* 2017; 8: 22842-53.
381. Yue CF, Feng PN, Yao ZR, Yu XG, Lin WB, Qian YM, Guo YM, Li LS, Liu M. High serum uric acid concentration predicts poor survival in patients with breast cancer. *Clin Chim Acta* 2017; 473: 160-5.
382. Zhang S, Lei R, Wu J, Shan J, Hu Z, Chen L, Ren X, Yao L, Wang J, Wang X. Role of high mobility group A1 and body mass index in the prognosis of patients with breast cancer. *Oncol Lett* 2017; 14: 5719-26.
383. Asaga S, Kinoshita T, Hojo T, Suzuki J, Jimbo K, Tsuda H. Prognostic factors for triple-negative breast cancer patients receiving preoperative systemic chemotherapy. *Clin Breast Cancer* 2013; 13: 40-6.
384. Fei F, Messina C, Slaets L, Chakiba C, Cameron D, Bogaerts J, Bonnefoi H. Tumour size is the only predictive factor of distant recurrence after pathological complete response to neoadjuvant chemotherapy in patients with large operable or locally advanced breast cancers: a sub-study of EORTC 10994/BIG 1-00 phase III trial. *Eur J Cancer* 2015; 51: 301-9.
385. Osman MA, Hennessy BT. Obesity Correlation With Metastases Development and Response to First-Line Metastatic Chemotherapy in Breast Cancer. *Clin Med Insights Oncol* 2015; 9: 105-12.
386. Huober J, Cole BF, Rabaglio M, Giobbie-Hurder A, Wu J, Ejlersen B, Bonnefoi H, Forbes JF, Neven P, Láng I, Smith I, Wardley A, Price KN, Goldhirsch A, Coates AS, Colleoni M, Gelber RD, Thürlimann B. Symptoms of endocrine treatment and outcome in the BIG 1-98 study. *Breast Cancer Res Treat* 2014; 143: 159-69.
387. Lee SA, Sung H, Han W, Noh DY, Ahn SH, Kang D. Serum adiponectin but not leptin at diagnosis as a predictor of breast cancer survival. *Asian Pac J Cancer Prev* 2014; 15: 6137-43.

388. Vici P, Sperati F, Maugeri-Saccà M, Melucci E, Di Benedetto A, Di Lauro L, Pizzuti L, Sergi D, Terrenato I, Esposito L, Iannuzzi CA, Pasquale R, Botti C, Fuhrman B, Giordano A, Mottolese M, Barba M. p53 status as effect modifier of the association between pre-treatment fasting glucose and breast cancer outcomes in non diabetic, HER2 positive patients treated with trastuzumab. *Oncotarget* 2014; 5: 10382-92.
389. Ampil F, Caldito G, Li B, Devarakonda S, Burton G, Kim RH, Chu Q. Morbid obesity does not disadvantage patients with in situ or early-stage carcinoma undergoing breast-conserving surgery. *Anticancer Res* 2013; 33: 3867-9.
390. Pande M, Thompson PA, Do KA, Sahin AA, Amos CI, Frazier ML, Bondy ML, Brewster AM. Genetic variants in the vitamin D pathway and breast cancer disease-free survival. *Carcinogenesis* 2013; 34: 587-94.
391. Natori A, Hayashi N, Soejima K, Deshpande GA, Takahashi O, Cristofanilli M, Ueno NT, Yamauchi H. A comparison of epidemiology, biology, and prognosis of inflammatory breast cancer in Japanese and US populations. *Clin Breast Cancer* 2013; 13: 460-4.
392. Del Fabbro E, Parsons H, Warneke CL, Pulivarthi K, Litton JK, Dev R, Palla SL, Brewster A, Bruera E. The relationship between body composition and response to neoadjuvant chemotherapy in women with operable breast cancer. *Oncologist* 2012; 17: 1240-5.
393. Melhem-Bertrandt A, Chavez-Macgregor M, Lei X, Brown EN, Lee RT, Meric-Bernstam F, Sood AK, Conzen SD, Hortobagyi GN, Gonzalez-Angulo AM. Beta-blocker use is associated with improved relapse-free survival in patients with triple-negative breast cancer. *J Clin Oncol* 2011; 29: 2645-52.
394. Eberlein T, Simon R, Fisher S, Lippman ME. Height, weight, and risk of breast cancer relapse. *Breast Cancer Res Treat* 1985; 5: 81-6.
395. Heasman KZ, Sutherland HJ, Campbell JA, Elhakim T, Boyd NF. Weight gain during adjuvant chemotherapy for breast cancer. *Breast Cancer Res Treat* 1985; 5: 195-200.
396. Bao PP, Zhao ZG, Gao YT, Zheng Y, Zhang B, Cai H, Zheng W, Shu XO, Lu W. Association of type 2 diabetes genetic variants with breast cancer survival among Chinese women. *PLoS One* 2015; 10: e0117419.
397. Chen Y, Dorjgochoo T, Bao PP, Zheng Y, Cai H, Lu W, Shu XO. Menopausal symptoms among breast cancer patients: a potential indicator of favorable prognosis. *PLoS One* 2013; 8: e75926.
398. Kim JY, Han W, Moon HG, Ahn SK, Kim J, Lee JW, Kim MK, Kim T, Noh DY. Prognostic effect of preoperative serum estradiol level in postmenopausal breast cancer. *BMC Cancer* 2013; 13: 503.
399. Fowble B, Hanlon A, Freedman G, Nicolaou N, Anderson P. Second cancers after conservative surgery and radiation for stages I-II breast cancer: identifying a subset of women at increased risk. *Int J Radiat Oncol Biol Phys* 2001; 51: 679-90.
400. Chen CM, Chang HT, Mok KT, Liu CI, Tsai CC, Jou NW, Wang BW, Chen IS. Analysis of prognostic factors in Chinese women with breast cancer in southern Taiwan. *Zhonghua Yi Xue Za Zhi (Taipei)* 1999; 62: 717-23.
401. Sheean P, Gomez-Perez S, Joyce C, O'Connor P, Bojko M, Smith A, Vasilopoulos V, Rao R, Sclamborg J, Robinson P. Myosteatorrhea at diagnosis is adversely associated with 2-year survival in women with estrogen receptor-negative metastatic breast cancer. *Breast Cancer Res Treat* 2021; 190: 121-32.
402. Cespedes Feliciano EM, Popuri K, Cobzas D, Baracos VE, Beg MF, Khan AD, Ma C, Chow V, Prado CM, Xiao J, Liu V, Chen WY, Meyerhardt J, Albers KB, Caan BJ. Evaluation of automated computed tomography segmentation to assess body composition and mortality associations in cancer patients. *J Cachexia Sarcopenia Muscle* 2020; 11: 1258-69.
403. Iwase T, Sangai T, Fujimoto H, Sawabe Y, Matsushita K, Nagashima K, Sato Y, Nakagawa A, Masuda T, Nagashima T, Ohtsuka M. Quality and quantity of visceral fat tissue are associated with

insulin resistance and survival outcomes after chemotherapy in patients with breast cancer. *Breast Cancer Res Treat* 2020; 179: 435-43.

404. Bradshaw PT, Cespedes Feliciano EM, Prado CM, Alexeeff S, Albers KB, Chen WY, Caan BJ. Adipose Tissue Distribution and Survival Among Women with Nonmetastatic Breast Cancer. *Obesity (Silver Spring)* 2019; 27: 997-1004.

405. Iwase T, Sangai T, Nagashima T, Sakakibara M, Sakakibara J, Hayama S, Ishigami E, Masuda T, Miyazaki M. Impact of body fat distribution on neoadjuvant chemotherapy outcomes in advanced breast cancer patients. *Cancer Med* 2016; 5: 41-8.

406. Makari-Judson G, Judson CH, Mertens WC. Longitudinal patterns of weight gain after breast cancer diagnosis: observations beyond the first year. *Breast J* 2007; 13: 258-65.

407. Costa LJ, Varella PC, del Giglio A. Weight changes during chemotherapy for breast cancer. *Sao Paulo Med J* 2002; 120: 113-7.

408. Marinho LA, Rettori O, Vieira-Matos AN. Body weight loss as an indicator of breast cancer recurrence. *Acta Oncol* 2001; 40: 832-7.

409. Kumar NB, Allen K, Cantor A, Cox CE, Greenberg H, Shah S, Lyman GH. Weight gain associated with adjuvant tamoxifen therapy in stage I and II breast cancer: fact or artifact? *Breast Cancer Res Treat* 1997; 44: 135-43.

410. Goodwin PJ, Panzarella T, Boyd NF. Weight gain in women with localized breast cancer-- a descriptive study. *Breast Cancer Res Treat* 1988; 11: 59-66.

411. Swenerton KD, Legha SS, Smith T, Hortobagyi GN, Gehan EA, Yap HY, Gutterman JU, Blumenschein GR. Prognostic factors in metastatic breast cancer treated with combination chemotherapy. *Cancer Res* 1979; 39: 1552-62.

412. Feigelson HS, Bodelon C, Powers JD, Curtis RE, Buist DSM, Veiga LHS, Bowles EJA, Berrington de Gonzalez A, Gierach GL. Body Mass Index and Risk of Second Cancer Among Women With Breast Cancer. *J Natl Cancer Inst* 2021; 113: 1156-60.

413. Minicozzi P, Berrino F, Sebastiani F, Falcini F, Vattiato R, Cioccoloni F, Calagreti G, Fusco M, Vitale MF, Tumino R, Sigona A, Budroni M, Cesaraccio R, Candela G, Scuderi T, Zarcione M, Campisi I, Sant M. High fasting blood glucose and obesity significantly and independently increase risk of breast cancer death in hormone receptor-positive disease. *Eur J Cancer* 2013; 49: 3881-8.

414. Iyengar NM, Hudis CA, Dannenberg AJ. Obesity and cancer: local and systemic mechanisms. *Annu Rev Med* 2015; 66: 297-309.

415. Hursting SD, Digiovanni J, Dannenberg AJ, Azrad M, Leroith D, Demark-Wahnefried W, Kakarala M, Brodie A, Berger NA. Obesity, energy balance, and cancer: new opportunities for prevention. *Cancer Prev Res (Phila)* 2012; 5: 1260-72.

416. Lohmann AE, Goodwin PJ, Chlebowski RT, Pan K, Stambolic V, Dowling RJ. Association of Obesity-Related Metabolic Disruptions With Cancer Risk and Outcome. *J Clin Oncol* 2016; 34: 4249-55.

417. Picon-Ruiz M, Morata-Tarifa C, Valle-Goffin JJ, Friedman ER, Slingerland JM. Obesity and adverse breast cancer risk and outcome: Mechanistic insights and strategies for intervention. *CA Cancer J Clin* 2017; 67: 378-97.

418. Bhardwaj P, Au CC, Benito-Martin A, Ladumor H, Oshchepkova S, Moges R, Brown KA. Estrogens and breast cancer: Mechanisms involved in obesity-related development, growth and progression. *J Steroid Biochem Mol Biol* 2019; 189: 161-70.

419. Rose DP, Vona-Davis L. The cellular and molecular mechanisms by which insulin influences breast cancer risk and progression. *Endocr Relat Cancer* 2012; 19: R225-41.

420. Iyengar NM, Hudis CA, Dannenberg AJ. Obesity and inflammation: new insights into breast cancer development and progression. *Am Soc Clin Oncol Educ Book* 2013: 46-51.

421. Yoon YS, Kwon AR, Lee YK, Oh SW. Circulating adipokines and risk of obesity related cancers: A systematic review and meta-analysis. *Obes Res Clin Pract* 2019; 13: 329-39.

422. Himbert C, Delphan M, Scherer D, Bowers LW, Hursting S, Ulrich CM. Signals from the Adipose Microenvironment and the Obesity-Cancer Link-A Systematic Review. *Cancer Prev Res (Phila)* 2017; 10: 494-506.
423. Lee DH, Giovannucci EL. The Obesity Paradox in Cancer: Epidemiologic Insights and Perspectives. *Curr Nutr Rep* 2019; 8: 175-81.
424. Karampela I, Chrysanthopoulou E, Christodoulatos GS, Dalamaga M. Is There an Obesity Paradox in Critical Illness? Epidemiologic and Metabolic Considerations. *Curr Obes Rep* 2020; 9: 231-44.
425. James FR, Wootton S, Jackson A, Wiseman M, Copson ER, Cutress RI. Obesity in breast cancer--what is the risk factor? *Eur J Cancer* 2015; 51: 705-20.
426. Bandera EV, Fay SH, Giovannucci E, Leitzmann MF, Marklew R, McTiernan A, Mullee A, Romieu I, Thune I, Uauy R, Wiseman MJ, World Cancer Research Fund International Continuous Update Project P. The use and interpretation of anthropometric measures in cancer epidemiology: A perspective from the world cancer research fund international continuous update project. *Int J Cancer* 2016; 139: 2391-7.
427. Aleixo GFP, Williams GR, Nyrop KA, Muss HB, Shachar SS. Muscle composition and outcomes in patients with breast cancer: meta-analysis and systematic review. *Breast Cancer Res Treat* 2019; 177: 569-79.
428. Christakoudi S, Tsilidis KK, Evangelou E, Riboli E. A Body Shape Index (ABSI), hip index, and risk of cancer in the UK Biobank cohort. *Cancer Med* 2021; 10: 5614-28.
429. Hudis CA, Barlow WE, Costantino JP, Gray RJ, Pritchard KI, Chapman JA, Sparano JA, Hunsberger S, Enos RA, Gelber RD, Zujewski JA. Proposal for standardized definitions for efficacy end points in adjuvant breast cancer trials: the STEEP system. *J Clin Oncol* 2007; 25: 2127-32.
430. Warren JL, Yabroff KR. Challenges and opportunities in measuring cancer recurrence in the United States. *J Natl Cancer Inst* 2015; 107.
431. Care DoHaS, Improving outcomes: a strategy for cancer, 2011.
432. Afifi AM, Saad AM, Al-Husseini MJ, Elmehrath AO, Northfelt DW, Sonbol MB. Causes of death after breast cancer diagnosis: A US population-based analysis. *Cancer* 2020; 126: 1559-67.
433. Riihimaki M, Thomsen H, Brandt A, Sundquist J, Hemminki K. Death causes in breast cancer patients. *Ann Oncol* 2012; 23: 604-10.
434. Dwivedi AK, Dubey P, Cistola DP, Reddy SY. Association Between Obesity and Cardiovascular Outcomes: Updated Evidence from Meta-analysis Studies. *Curr Cardiol Rep* 2020; 22: 25.
435. Baracos VE, Martin L, Korc M, Guttridge DC, Fearon KCH. Cancer-associated cachexia. *Nat Rev Dis Primers* 2018; 4: 17105.
436. Pang Y, Wei Y, Kartsonaki C. Associations of adiposity and weight change with recurrence and survival in breast cancer patients: a systematic review and meta-analysis. *Breast Cancer* 2022; 29: 575-88.
437. van den Berg MM, Winkels RM, de Kruif JT, van Laarhoven HW, Visser M, de Vries JH, de Vries YC, Kampman E. Weight change during chemotherapy in breast cancer patients: a meta-analysis. *BMC Cancer* 2017; 17: 259.
438. Harborg S, Zachariae R, Olsen J, Johannsen M, Cronin-Fenton D, Boggild H, Borgquist S. Overweight and prognosis in triple-negative breast cancer patients: a systematic review and meta-analysis. *NPJ Breast Cancer* 2021; 7: 119.
439. Lohmann AE, Soldera SV, Pimentel I, Ribnikar D, Ennis M, Amir E, Goodwin PJ. Association of Obesity with Breast Cancer Outcome in Relation to Cancer Subtypes: A Meta-Analysis. *J Natl Cancer Inst* 2021.
440. Vance V, Mourtzakis M, McCargar L, Hanning R. Weight gain in breast cancer survivors: prevalence, pattern and health consequences. *Obes Rev* 2011; 12: 282-94.

441. Pedersen B, Delmar C, Lorincz T, Falkmer U, Gronkjaer M. Investigating Changes in Weight and Body Composition Among Women in Adjuvant Treatment for Breast Cancer: A Scoping Review. *Cancer Nurs* 2019; 42: 91-105.
442. Trestini I, Carbognin L, Monteverdi S, Zanelli S, De Toma A, Bonaiuto C, Nortilli R, Fiorio E, Pilotto S, Di Maio M, Gasbarrini A, Scambia G, Tortora G, Bria E. Clinical implication of changes in body composition and weight in patients with early-stage and metastatic breast cancer. *Crit Rev Oncol Hematol* 2018; 129: 54-66.
443. Makari-Judson G, Braun B, Jerry DJ, Mertens WC. Weight gain following breast cancer diagnosis: Implication and proposed mechanisms. *World J Clin Oncol* 2014; 5: 272-82.
444. Calle EE, Kaaks R. Overweight, obesity and cancer: epidemiological evidence and proposed mechanisms. *Nat Rev Cancer* 2004; 4: 579-91.
445. Chlebowski RT, Reeves MM. Weight Loss Randomized Intervention Trials in Female Cancer Survivors. *J Clin Oncol* 2016; 34: 4238-48.
446. Rock CL, Thomson CA, Sullivan KR, Howe CL, Kushi LH, Caan BJ, Neuhauser ML, Bandera EV, Wang Y, Robien K, Basen-Engquist KM, Brown JC, Courneya KS, Crane TE, Garcia DO, Grant BL, Hamilton KK, Hartman SJ, Kenfield SA, Martinez ME, Meyerhardt JA, Nekhlyudov L, Overholser L, Patel AV, Pinto BM, Platek ME, Rees-Punia E, Spees CK, Gapstur SM, McCullough ML. American Cancer Society nutrition and physical activity guideline for cancer survivors. *CA Cancer J Clin* 2022; 72: 230-62.
447. Inoue-Choi M, Robien K, Lazovich D. Adherence to the WCRF/AICR guidelines for cancer prevention is associated with lower mortality among older female cancer survivors. *Cancer Epidemiol Biomarkers Prev* 2013; 22: 792-802.
